# Supplementary material for: Mapping and analysis of Caenorhabditis elegans transcription factor sequence specificities
Source: eLife. 2015 Apr 23;4:e06967. doi: 10.7554/eLife.06967 (PMC4434323; doi:10.7554/eLife.06967)
Supplement: Figure 1—source data 1. — The number of unique C. elegans TFs by DNA-binding domain family for which a motif has been derived using PBM (this study), previous literature (including PBMs), or by homology-based prediction rules and the list of C. elegans TFs by DNA-binding domain family type. DOI: http://dx.doi.org/10.7554/eLife.06967.004 [file elife06967s001.xlsx]

## Sheet: celegans_motif_coverage
Figure 1- Source data 1: The number of unique C. elegans Transcription Factors by DNA-binding domain family for which a motif has been derived using PBM (this study), previous literature (including PBMs), or by homology-based prediction rules (see main text)
Domain	Source	Motif_coverage%	Total Number of TFs	Number of TFs with motifs
Nuclear receptor	new PBM motifs	7.4	271	20
C2H2 ZF	new PBM motifs	42.9	98	42
Homeodomain	new PBM motifs	10.3	87	9
bHLH	new PBM motifs	5.1	39	2
bZIP	new PBM motifs	45.7	35	16
T-box	new PBM motifs	18.2	22	4
Sox	new PBM motifs	17.6	17	3
Forkhead	new PBM motifs	18.8	16	3
MADF	new PBM motifs	8.3	12	1
DM	new PBM motifs	81.8	11	9
GATA	new PBM motifs	45.5	11	5
Myb/SANT	new PBM motifs	0	11	0
Ets	new PBM motifs	0	10	0
Paired box	new PBM motifs	12.5	8	1
SMAD	new PBM motifs	0	7	0
THAP finger	new PBM motifs	0	7	0
CUT,Homeodomain	new PBM motifs	0	6	0
AP-2	new PBM motifs	0	5	0
CSD	new PBM motifs	0	5	0
ARID/BRIGHT	new PBM motifs	0	4	0
SAND	new PBM motifs	0	4	0
Brinker	new PBM motifs	33.3	3	1
E2F	new PBM motifs	33.3	3	1
GATA,Myb/SANT	new PBM motifs	0	3	0
Homeodomain,Paired box	new PBM motifs	33.3	3	1
Homeodomain,POU	new PBM motifs	33.3	3	1
Unknown	new PBM motifs	0	3	0
AT hook	new PBM motifs	0	2	0
CBF/NF-Y	new PBM motifs	0	2	0
HSF	new PBM motifs	50	2	1
MADS box	new PBM motifs	50	2	1
MBD	new PBM motifs	0	2	0
mTERF	new PBM motifs	0	2	0
Ndt80/PhoG	new PBM motifs	0	2	0
Pipsqueak	new PBM motifs	50	2	1
STAT	new PBM motifs	0	2	0
TBP	new PBM motifs	0	2	0
ARID/BRIGHT,RFX	new PBM motifs	0	1	0
BED ZF	new PBM motifs	100	1	1
bHLH,Rap1	new PBM motifs	0	1	0
C2H2 ZF,Homeodomain	new PBM motifs	0	1	0
C2HC ZF	new PBM motifs	100	1	1
CCCH ZF	new PBM motifs	100	1	1
CENPB	new PBM motifs	100	1	1
CG-1	new PBM motifs	0	1	0
CSL	new PBM motifs	0	1	0
CxC	new PBM motifs	0	1	0
CxxC	new PBM motifs	100	1	1
DP,E2F	new PBM motifs	0	1	0
Grainyhead	new PBM motifs	0	1	0
Homeodomain,THAP finger	new PBM motifs	0	1	0
NFX	new PBM motifs	0	1	0
Prospero	new PBM motifs	100	1	1
RFX	new PBM motifs	100	1	1
Runt	new PBM motifs	0	1	0
SART-1	new PBM motifs	0	1	0
TEA	new PBM motifs	0	1	0
Nuclear receptor	previous	3	271	8
C2H2 ZF	previous	5.1	98	5
Homeodomain	previous	17.2	87	15
bHLH	previous	28.2	39	11
bZIP	previous	5.7	35	2
T-box	previous	4.5	22	1
Sox	previous	5.9	17	1
Forkhead	previous	12.5	16	2
MADF	previous	16.7	12	2
DM	previous	0	11	0
GATA	previous	18.2	11	2
Myb/SANT	previous	9.1	11	1
Ets	previous	10	10	1
Paired box	previous	25	8	2
SMAD	previous	14.3	7	1
THAP finger	previous	0	7	0
CUT,Homeodomain	previous	16.7	6	1
AP-2	previous	0	5	0
CSD	previous	20	5	1
ARID/BRIGHT	previous	25	4	1
SAND	previous	25	4	1
Brinker	previous	0	3	0
E2F	previous	33.3	3	1
GATA,Myb/SANT	previous	33.3	3	1
Homeodomain,Paired box	previous	0	3	0
Homeodomain,POU	previous	33.3	3	1
Unknown	previous	100	3	3
AT hook	previous	100	2	2
CBF/NF-Y	previous	0	2	0
HSF	previous	0	2	0
MADS box	previous	0	2	0
MBD	previous	0	2	0
mTERF	previous	0	2	0
Ndt80/PhoG	previous	0	2	0
Pipsqueak	previous	0	2	0
STAT	previous	0	2	0
TBP	previous	0	2	0
ARID/BRIGHT,RFX	previous	0	1	0
BED ZF	previous	0	1	0
bHLH,Rap1	previous	0	1	0
C2H2 ZF,Homeodomain	previous	0	1	0
C2HC ZF	previous	0	1	0
CCCH ZF	previous	0	1	0
CENPB	previous	0	1	0
CG-1	previous	0	1	0
CSL	previous	0	1	0
CxC	previous	0	1	0
CxxC	previous	0	1	0
DP,E2F	previous	0	1	0
Grainyhead	previous	0	1	0
Homeodomain,THAP finger	previous	0	1	0
NFX	previous	0	1	0
Prospero	previous	0	1	0
RFX	previous	0	1	0
Runt	previous	0	1	0
SART-1	previous	0	1	0
TEA	previous	0	1	0
Nuclear receptor	predicted	7.7	271	21
C2H2 ZF	predicted	6.1	98	6
Homeodomain	predicted	42.5	87	37
bHLH	predicted	20.5	39	8
bZIP	predicted	2.9	35	1
T-box	predicted	13.6	22	3
Sox	predicted	5.9	17	1
Forkhead	predicted	31.3	16	5
MADF	predicted	0	12	0
DM	predicted	0	11	0
GATA	predicted	18.2	11	2
Myb/SANT	predicted	9.1	11	1
Ets	predicted	70	10	7
Paired box	predicted	12.5	8	1
SMAD	predicted	0	7	0
THAP finger	predicted	0	7	0
CUT,Homeodomain	predicted	0	6	0
AP-2	predicted	0	5	0
CSD	predicted	0	5	0
ARID/BRIGHT	predicted	0	4	0
SAND	predicted	0	4	0
Brinker	predicted	0	3	0
E2F	predicted	0	3	0
GATA,Myb/SANT	predicted	0	3	0
Homeodomain,Paired box	predicted	33.3	3	1
Homeodomain,POU	predicted	33.3	3	1
Unknown	predicted	0	3	0
AT hook	predicted	0	2	0
CBF/NF-Y	predicted	0	2	0
HSF	predicted	0	2	0
MADS box	predicted	50	2	1
MBD	predicted	0	2	0
mTERF	predicted	0	2	0
Ndt80/PhoG	predicted	0	2	0
Pipsqueak	predicted	0	2	0
STAT	predicted	0	2	0
TBP	predicted	50	2	1
ARID/BRIGHT,RFX	predicted	0	1	0
BED ZF	predicted	0	1	0
bHLH,Rap1	predicted	0	1	0
C2H2 ZF,Homeodomain	predicted	0	1	0
C2HC ZF	predicted	0	1	0
CCCH ZF	predicted	0	1	0
CENPB	predicted	0	1	0
CG-1	predicted	0	1	0
CSL	predicted	0	1	0
CxC	predicted	0	1	0
CxxC	predicted	0	1	0
DP,E2F	predicted	0	1	0
Grainyhead	predicted	0	1	0
Homeodomain,THAP finger	predicted	0	1	0
NFX	predicted	0	1	0
Prospero	predicted	0	1	0
RFX	predicted	0	1	0
Runt	predicted	0	1	0
SART-1	predicted	0	1	0
TEA	predicted	0	1	0
Nuclear receptor	no motifs	81.9	271	222
C2H2 ZF	no motifs	45.9	98	45
Homeodomain	no motifs	29.9	87	26
bHLH	no motifs	46.2	39	18
bZIP	no motifs	45.7	35	16
T-box	no motifs	63.6	22	14
Sox	no motifs	70.6	17	12
Forkhead	no motifs	37.5	16	6
MADF	no motifs	75	12	9
DM	no motifs	18.2	11	2
GATA	no motifs	18.2	11	2
Myb/SANT	no motifs	81.8	11	9
Ets	no motifs	20	10	2
Paired box	no motifs	50	8	4
SMAD	no motifs	85.7	7	6
THAP finger	no motifs	100	7	7
CUT,Homeodomain	no motifs	83.3	6	5
AP-2	no motifs	100	5	5
CSD	no motifs	80	5	4
ARID/BRIGHT	no motifs	75	4	3
SAND	no motifs	75	4	3
Brinker	no motifs	66.7	3	2
E2F	no motifs	33.3	3	1
GATA,Myb/SANT	no motifs	66.7	3	2
Homeodomain,Paired box	no motifs	33.3	3	1
Homeodomain,POU	no motifs	0	3	0
Unknown	no motifs	0	3	0
AT hook	no motifs	0	2	0
CBF/NF-Y	no motifs	100	2	2
HSF	no motifs	50	2	1
MADS box	no motifs	0	2	0
MBD	no motifs	100	2	2
mTERF	no motifs	100	2	2
Ndt80/PhoG	no motifs	100	2	2
Pipsqueak	no motifs	50	2	1
STAT	no motifs	100	2	2
TBP	no motifs	50	2	1
ARID/BRIGHT,RFX	no motifs	100	1	1
BED ZF	no motifs	0	1	0
bHLH,Rap1	no motifs	100	1	1
C2H2 ZF,Homeodomain	no motifs	100	1	1
C2HC ZF	no motifs	0	1	0
CCCH ZF	no motifs	0	1	0
CENPB	no motifs	0	1	0
CG-1	no motifs	100	1	1
CSL	no motifs	100	1	1
CxC	no motifs	100	1	1
CxxC	no motifs	0	1	0
DP,E2F	no motifs	100	1	1
Grainyhead	no motifs	100	1	1
Homeodomain,THAP finger	no motifs	100	1	1
NFX	no motifs	100	1	1
Prospero	no motifs	0	1	0
RFX	no motifs	0	1	0
Runt	no motifs	100	1	1
SART-1	no motifs	100	1	1
TEA	no motifs	100	1	1

## Sheet: DBD family types abbreviation
Figure 1- Source data 1: The list of C. elegans Transcription Factors by DNA-binding domain family type
DNA Binding Domain (DBD) Abbreviation	DBD Full Name	PFAM Family ID
AP-2	Transcription factor AP-2	TF_AP-2
ARID/BRIGHT	ARID/BRIGHT DNA binding domain	ARID
AT hook	AT hook	AT_hook
BED ZF	BED zinc finger	zf-BED
bHLH	Basic helix-loop-helix	HLH
Rap1	Rap1, DNA-binding	Rap1-DNA-bind
Brinker	Brinker DNA-binding domain	BrkDBD
bZIP	Basic Leucine Zipper (bZIP) transcription factor	bZIP_1
C2H2 ZF	Zinc finger, C2H2 type	zf-C2H2
C2HC ZF	Zinc finger, C2HC type	zf-C2HC
CBF/NF-Y	CCAAT-binding transcription factor (CBF-B/NF-YA) subunit B	CBFB_NFYA
CCCH ZF	Zinc finger C-x8-C-x5-C-x3-H type (and similar)	zf-CCCH
CENPB	CENP-B N-terminal DNA-binding domain	CENP-B_N
CG-1	CG-1 domain	CG-1
CSD	'Cold-shock' DNA-binding domain	CSD
CSL	LAG1, DNA binding domain	LAG1-DNAbind
CUT	CUT domain	CUT
CxC	CxC domain	CXC
CxxC	CXXC zinc finger domain	zf-CXXC
DM	DM DNA binding domain	DM
DP	Transcription factor DP	DP
E2F	E2F/DP family winged-helix DNA-binding domain	E2F_TDP
Ets	Ets-domain	Ets
Forkhead	Fork head domain	Fork_head
GATA	GATA zinc finger	GATA
Grainyhead	CP2 transcription factor	CP2
Homeodomain	Homeobox domain	Homeobox
HSF	Heat shock factors (HSF)-type DNA-binding	HSF_DNA-bind
MADF	Alcohol dehydrogenase transcription factor Myb/SANT-like	MADF_DNA_bdg
MADS box	SRF-type transcription factor	SRF-TF
MBD	Methyl-CpG binding domain	MBD
mTERF	mitochondrial transcription termination factor (mTERF)	mTERF
Myb/SANT	Myb-like DNA-binding domain	Myb_DNA-binding
Ndt80/PhoG	NDT80 / PhoG like DNA-binding family	NDT80_PhoG
NFX	NF-X1 type zinc finger	zf-NF-X1
Nuclear receptor	Zinc finger, C4 type (two domains)	zf-C4
Paired box	'Paired box' domain	PAX
Pipsqueak	helix-turn-helix, Pipsqueak domain	HTH_psq
POU	POU domain	Pou
Prospero	Homeo-prospero domain	Prox1
RFX	RFX DNA-binding domain	RFX_DNA_binding
Runt	Runt domain	Runt
SAND	SAND DNA-binding protein domain	SAND
SART-1	SART-1 family	SART-1
SMAD	MH1 (MAD homology 1) domain	MH1
Sox	HMG (high mobility group) box	HMG_box
STAT	STAT protein (Signal Transducer and Activator of Transcription, or Signal Transduction And transcription) DNA binding domain	STAT_bind
T-box	T-box DNA-binding domain	T-box
TBP	Transcription factor TFIID (or TATA-binding protein, TBP)	TBP
TEA	TEA/ATTS domain family	TEA
THAP finger	THAP domain	THAP
Unknown	TF with unidentified DBD	N/A
