# Supplementary material for: Mapping and analysis of Caenorhabditis elegans transcription factor sequence specificities
Source: eLife. 2015 Apr 23;4:e06967. doi: 10.7554/eLife.06967 (PMC4434323; doi:10.7554/eLife.06967)
Supplement: Figure 4—source data 1. — 8-mers bound by at least one NHR with an E-score ≥0.45 for all the C. elegans NHRs that have been analyzed by PBMs (center panel) and a table of pullouts (top and bottom panel) showing average (ME and HK) E-scores of the union of the top ten highly scoring 8-mers bound by at least one NHR within the selected motif cluster. DOI: http://dx.doi.org/10.7554/eLife.06967.015 [file elife06967s003.xlsx]

## Sheet: centre-heatmap
Figure 4- Source data 1: Table showing 8-mers bound by atleast one NHR with an E-score >=0.45 for all the C. elegans NHRs that have been analyzed by PBMs
	nhr-182_HK	nhr-182_ME	nhr-65_HK	nhr-65_ME	nhr-177_HK	nhr-177_ME	nhr-42_HK	nhr-42_ME	odr-7_HK	odr-7_ME	nhr-145_HK	nhr-145_ME	nhr-216_HK	nhr-216_ME	nhr-232_HK	nhr-232_ME	nhr-84_HK	nhr-84_ME	nhr-142_HK	nhr-142_ME	nhr-66_HK	nhr-66_ME	nhr-122_HK	nhr-122_ME	nhr-86_HK	nhr-86_ME	nhr-70_HK	nhr-70_ME	nhr-5_HK	nhr-5_ME	nhr-204_HK	nhr-204_ME	nhr-168_HK	nhr-168_ME	nhr-154_HK	nhr-154_ME	daf-12_HK	daf-12_ME	sex-1_HK	sex-1_ME	nhr-36_HK	nhr-36_ME	nhr-7_HK	nhr-7_ME	nhr-3_HK	nhr-3_ME	nhr-1_HK	nhr-1_ME	nhr-49_HK
	0.428488	0.365271	0.290304	0.252605	0.0326511	0.233366	0.328669	0.267761	0.164073	0.0843915	0.454831	0.308992	0.29274	0.137659	0.372524	0.36075	0.429712	0.321628	0.350676	0.39027	0.133052	-0.03897	0.227165	0.281978	0.434124	0.106182	0.409947	0.29739	0.388075	0.36039	-0.090308	0.0720808	0.326904	0.298327	0.104101	0.141755	0.11443	0.0476045	0.093031	0.0976283	0.171093	0.29277	0.143806	0.152129	0.282081	0.238256	0.203297	0.114806	0.248081
GAGCACAA	0.388381	0.451192	0.324094	0.3867	0.0994686	0.0910363	0.301969	0.288427	0.142653	0.0593044	0.401856	0.424211	0.0457881	0.0693098	0.271856	0.358443	0.27896	0.26925	0.229126	0.390855	0.269296	0.28125	0.198553	0.101034	0.302346	0.123163	0.333449	0.238558	0.27376	0.183727	-0.0529065	-0.0252538	0.242651	0.269163	-0.145223	0.15007	0.232339	0.0341624	0.262382	0.212478	0.111238	-0.0039879	-0.110292	0.0953714	0.16011	0.160872	-0.00554803	0.0787413	0.175009
ACACATAT	0.384885	0.452796	0.126286	0.426038	0.134949	0.0528947	0.302519	0.319653	0.114194	0.0534714	0.220291	0.261751	-0.0493265	0.160984	-0.000395702	0.343712	0.174785	0.296011	-0.127984	0.327811	0.117085	0.197959	0.014953	0.273771	0.138102	0.171134	0.329335	0.167764	0.2379	0.245488	0.085631	0.0185129	0.14783	0.153147	0.0569647	0.093631	0.202529	0.0107289	0.2501	0.122303	0.154016	-0.00486105	0.120224	0.143514	-0.0311716	0.146815	0.0623971	0.157082	0.0976528
ACACACGA	0.392747	0.450286	0.254986	0.384965	-0.0265709	-0.0625092	0.317738	0.377886	0.0573521	0.153777	0.195759	0.371803	-0.119997	0.291016	0.165965	0.344834	0.320614	0.356126	0.148895	0.410021	0.158372	0.31663	0.163705	0.27124	0.315493	0.293311	0.423855	0.144554	-0.0881249	0.245709	-0.0858858	0.157648	-0.026135	0.252164	0.152511	0.196764	-0.207212	-0.0448761	-0.093717	0.191779	0.0442716	0.00168851	0.0523333	0.154132	-0.0363325	0.157401	-0.178781	0.235923	-0.0674628
AATGTGTG	0.415877	0.451793	0.362331	0.400737	0.0190645	0.0150531	0.322514	0.396614	0.0434387	0.0712771	0.269841	0.357055	0.194903	0.25028	0.34886	0.425027	0.21005	0.132721	0.329594	0.388693	0.324425	0.379258	0.153265	0.339414	0.40231	0.264046	0.427488	0.259692	0.187638	0.241778	0.231758	0.0934276	0.162823	0.156025	0.146273	0.225329	0.0207329	0.235339	0.0858558	0.198369	0.200097	0.044608	0.165264	0.308775	0.164634	0.179935	0.224486	0.159899	0.0577478
ACACACTA	0.427457	0.461702	0.358728	0.457308	0.0538092	0.0861441	0.274493	0.256909	0.184011	0.0319263	0.201323	0.310024	0.206602	0.19805	0.282925	0.388034	0.144433	0.0913103	0.32101	0.419385	0.250478	0.288928	0.209106	0.305721	0.269102	0.106562	0.340145	0.240159	0.255267	0.340358	0.000572818	0.112674	0.106502	0.156731	0.0898993	0.221996	0.19355	0.0857619	-0.0251376	0.140778	0.22243	0.119281	0.193537	0.251841	0.124204	0.233411	0.157818	0.228677	-0.0536616
AAACACAC	0.396998	0.455707	0.345814	0.42909	-0.0276571	0.089519	0.241176	0.196198	0.17573	0.0376142	0.155543	0.366686	0.210777	0.313643	0.329491	0.4135	0.0574666	0.202384	0.330567	0.450342	0.0948935	0.300871	0.0882046	0.297559	0.266391	0.0334036	0.350677	0.197837	0.187916	0.357505	0.142777	0.013823	0.0699101	0.173215	-0.0151274	0.211621	0.0505909	0.113084	0.0586724	-1.0989e-05	0.118476	0.170149	0.0579484	0.277514	0.108953	0.188237	0.127991	0.151219	0.051604
AAAACACA	0.367679	0.432178	0.305038	0.396537	-0.123958	-0.0740982	0.378633	0.385105	0.0680109	0.0156233	0.15418	0.282013	0.147511	0.193343	0.299055	0.410101	0.304974	0.334213	0.192179	0.453885	0.189943	0.174432	0.176982	0.218769	0.302623	0.207951	0.372093	0.159564	0.0679481	0.141294	0.0572155	0.125003	0.0833376	0.221116	0.151311	0.183254	-0.0137114	0.081628	0.174422	0.248958	0.0632388	0.0877268	-0.0294001	0.262832	0.0619322	0.141612	0.0237097	0.206879	0.0559221
ATGTGTGA	0.221793	0.409192	0.0935009	0.359547	-0.166154	0.0643717	0.257734	0.366035	-0.027057	0.232997	0.061014	0.265322	0.217742	0.342237	0.267628	0.446802	0.0732502	0.266072	0.164114	0.468033	-0.0842184	0.136523	-0.0728656	0.248792	0.00166055	0.16942	0.210014	-0.087206	-0.100305	0.0998809	-0.00741369	0.110049	-0.0772196	0.114269	-0.000253279	0.259046	-0.219382	-0.00535065	-0.123958	0.062855	0.133126	0.367503	0.0737801	0.234807	-0.0191167	0.120397	-0.0118005	0.256547	0.140574
AAATCACA	0.347045	0.412748	0.309192	0.416864	0.0307179	0.0667811	0.0753861	0.293217	0.109913	0.291302	0.21549	0.36009	0.160633	0.273713	0.386009	0.454135	0.327946	0.37334	0.33067	0.457378	0.130345	0.275445	0.0490835	0.312729	0.259092	0.0198769	0.372634	0.264649	0.147871	0.234108	-0.0235793	0.0792032	0.0849817	0.284982	0.248101	0.245197	0.0816285	0.0298442	0.117431	-0.0403632	0.0702507	0.246345	0.19068	0.222466	0.0702541	0.28885	0.154522	0.25187	0.00861889
CACAAAAA	0.422231	0.421593	0.339368	0.4246	-0.151428	0.103837	0.171109	0.25594	0.204998	0.11876	0.345907	0.402326	0.331642	0.361748	0.356541	0.442455	0.183151	0.291182	0.353476	0.453611	0.280999	0.289836	0.106505	0.302769	0.414697	0.0990876	0.357374	0.269351	0.0986675	0.289133	0.0427742	0.171422	0.14352	0.222142	0.0502058	0.234642	0.0551557	0.0573606	0.261472	0.157911	0.062172	0.072089	-0.0959441	0.223766	0.120328	0.283543	0.0635043	0.267254	0.0987144
AAACACAA	0.434069	0.42902	0.329206	0.454719	-0.115927	0.0323261	0.332615	0.334597	0.169854	0.315113	0.423209	0.465973	0.312882	0.288812	0.319913	0.434133	0.308909	0.31279	0.386962	0.46335	0.253316	0.269355	0.192989	0.296179	0.348703	0.246081	0.432582	0.348155	0.185391	0.217502	0.0895962	0.065255	0.214569	0.196861	0.136638	0.182298	0.175626	0.0188064	-0.00194572	0.263631	0.0955398	0.198169	0.19227	0.254632	0.133276	0.227311	0.136741	0.134626	-0.0803998
ACACAAAC	0.450692	0.464176	0.369724	0.394795	0.200337	0.0781329	0.255395	0.295964	0.161018	0.248008	0.380765	0.451023	0.249009	0.200626	0.355939	0.404046	0.392984	0.318171	0.32531	0.438097	0.209325	0.220079	0.182324	0.311404	0.243628	0.150811	0.337384	0.215414	0.235228	0.126682	0.110622	-0.0140769	0.250409	0.239909	0.139488	0.193931	0.199454	0.0810171	0.207294	0.220408	0.131301	0.116959	-0.05906	0.17013	0.163054	0.185864	0.0891371	0.10182	0.148715
GACACATA	0.455026	0.445553	0.411946	0.37838	0.0635687	-0.0198907	0.131156	0.210331	0.116029	0.0390022	0.440296	0.433445	0.386694	0.319818	0.396288	0.359539	0.377106	0.348056	0.412679	0.443216	0.27155	0.130865	0.234977	0.180878	0.406647	0.0262904	0.346144	0.289587	0.263418	0.24267	0.187353	-0.103433	0.307876	0.224275	0.165111	-0.0581366	0.126271	-0.0113916	0.102671	0.0323855	0.116925	-0.0308802	0.0586038	0.110156	0.258446	0.121917	0.209116	0.0991926	0.191633
GAACACAA	0.463658	0.434087	0.253954	0.317116	-0.10716	-0.0141777	0.166526	0.127431	-0.177469	0.0725803	0.454635	0.424567	0.333987	0.240302	0.225786	0.358035	0.399994	0.257947	0.337073	0.430667	0.0813251	0.0794008	-0.0344546	-0.0940467	0.352934	0.0427589	0.338279	0.148573	-0.0372668	-0.131876	-0.237572	-0.176955	-0.132422	-0.180134	-0.0843942	0.0251419	0.0163759	0.0734484	-0.0491845	0.0372218	-0.117134	-0.0506305	-0.202457	-0.148149	-0.0800568	-0.0343861	-0.21261	-0.125337	-0.176195
CTTGTGTC	0.466202	0.434113	0.254051	0.352577	-0.0343533	0.0277759	0.265593	0.241888	-0.057833	0.152498	0.413044	0.382967	0.133388	0.116199	0.268084	0.319578	0.430837	0.281003	0.3303	0.406096	0.120423	0.0853849	-0.0618535	0.220256	0.266738	0.134505	0.328881	0.125829	0.0922454	0.137502	-0.0627581	0.0776372	0.215357	0.104486	0.134991	0.121015	0.251947	0.174918	0.0510872	0.24482	0.0195872	-0.13019	-0.131247	0.157708	-0.132239	0.105683	-0.0629698	0.0289294	-0.0431021
ATGTGTCC	0.474099	0.434782	0.350702	0.375628	-0.0335105	-0.0973696	0.342007	0.256688	-0.0368294	0.125944	0.300035	0.206931	0.196182	0.172918	0.312891	0.285477	0.33693	0.198962	0.363757	0.378967	0.227694	0.310388	0.149434	0.137503	0.382265	0.182891	0.401496	0.252531	0.128552	0.0984407	-0.0981	-0.00564911	0.235011	0.143798	0.203771	0.0626715	0.134625	0.242069	-0.0803255	0.152468	0.111367	0.0591629	0.153805	-0.0084328	0.0649552	0.157509	0.195768	0.00652151	0.00916339
AAGTGTGT	0.473974	0.451514	0.353915	0.307754	0.163785	0.140147	0.283365	-0.0344601	0.034751	0.00447596	0.349158	0.336456	0.165	0.0304288	0.389402	0.257624	0.410533	0.191	0.452969	0.437139	0.122268	0.0257744	0.0218497	0.0425558	0.302424	0.0534987	0.237991	0.252005	0.106656	-0.0531969	0.0383345	-0.0039126	0.111897	-0.0432309	0.199606	-0.0636473	0.132205	0.062537	0.016704	-0.0402952	0.0522147	-0.331069	-0.0825908	-0.154212	-0.0248306	0.0250034	0.0633802	-0.114691	-0.150864
GGGACACA	0.464534	0.457952	0.367937	0.357415	-0.00114103	0.118545	0.255278	0.2382	0.177215	0.0374597	0.417153	0.390404	0.278036	0.132084	0.356627	0.354866	0.430882	0.140401	0.38216	0.436977	0.216293	0.201075	0.178701	0.0564543	0.295655	0.163511	0.258883	0.277472	0.15217	0.0351586	0.189472	0.113614	0.328248	0.140393	0.355791	0.231303	0.200547	0.0609371	0.11086	0.327364	0.246588	0.0316747	0.0820864	0.130837	0.123244	0.0513952	0.131468	0.0635264	0.120733
AATGTGTC	0.449404	0.458842	0.328159	0.382466	-0.101547	0.0380297	0.303412	0.29047	0.228282	0.2714	0.376543	0.412336	0.183958	0.152087	0.382221	0.433215	0.437475	0.338156	0.296841	0.425573	0.330698	0.321748	0.179357	0.237524	0.435293	0.289726	0.429156	0.386065	0.17457	0.0911903	0.0490504	0.154334	0.335047	0.272042	0.127288	0.283342	0.169339	0.0863321	0.178737	0.125098	0.124324	0.0865791	0.0725298	0.220631	0.199294	0.144605	0.139914	0.123837	0.113942
AATTGTGT	0.455035	0.435528	0.462756	0.430737	-0.0748807	0.0556637	0.147009	0.199627	0.19822	0.157113	0.401497	0.453871	0.359764	0.354156	0.43975	0.436484	0.405331	0.321493	0.449443	0.453827	0.319128	0.246973	0.329128	0.288782	0.443003	0.104324	0.353861	0.26705	0.246531	0.239767	0.184827	0.0794953	0.290656	0.250742	0.231645	0.18905	0.244884	0.00323826	0.210739	0.259467	0.0370408	0.107464	0.141849	0.273519	0.305181	0.215081	0.282329	0.158825	0.220412
AACACAAA	0.459381	0.442027	0.436996	0.451412	-0.0755948	0.00932788	0.356923	0.287279	0.306801	0.162343	0.402396	0.441861	0.292598	0.286103	0.428893	0.429396	0.454836	0.365826	0.414412	0.439399	0.37774	0.353951	0.318187	0.193413	0.431573	0.200578	0.416892	0.384564	0.195293	0.152885	0.290446	0.0661513	0.335386	0.309307	0.242335	0.330348	0.237087	0.0567178	0.185887	0.27283	0.269136	0.133896	0.166534	0.256424	0.258621	0.239482	0.261798	0.191972	0.31032
ACACAAAT	0.458252	0.459691	0.347395	0.375406	-0.249621	-0.0489227	0.297891	0.223833	-0.0239535	0.25089	0.279908	0.434799	0.220288	0.121522	0.32977	0.382728	0.46464	0.210235	0.390959	0.456065	0.261821	0.19981	0.0924732	0.101752	0.398919	0.0899438	0.368057	0.337969	-0.0101547	0.0330699	-0.0149953	-0.152433	0.115013	-0.031405	-0.0257199	-0.0293231	0.104435	-0.117718	0.0815624	0.0297314	-0.0705424	-0.169897	-0.120621	-0.102	-0.0750535	0.0201735	-0.0905487	0.0581988	0.144455
TAGACACA	0.417599	0.441327	0.130194	0.250967	-0.00679328	0.0101457	0.360089	0.302057	0.0545711	0.0602401	0.435724	0.448317	0.10631	0.206072	0.272773	0.315081	0.476235	0.35731	0.377575	0.466385	-0.0520107	0.0725812	-0.0373146	0.0154545	0.427525	0.140947	0.459044	0.270034	-0.201457	0.0188149	-0.300305	-0.0831137	0.00573713	0.209083	0.0101093	-0.0215702	0.0463287	0.197968	-0.26216	-0.0310874	-0.114448	0.0468424	-0.0969097	-0.154363	-0.273049	0.0540517	-0.103433	-0.00741786	-0.259176
GGGCACAA	0.434816	0.409976	0.179935	0.25796	-0.0891506	0.168291	0.375947	0.28895	-0.086282	0.127121	0.39378	0.415059	0.0323577	0.0076905	0.327658	0.379506	0.469969	0.37368	0.322195	0.466997	-0.0417239	0.07459	0.0309022	0.170907	0.40578	0.106215	0.375058	0.24627	-0.118575	0.0697628	-0.137986	-0.0336327	0.136799	0.174842	-0.103339	0.0315814	0.00857632	0.210685	-0.0956775	0.0496526	-0.0191755	0.0943736	-0.001183	-0.0852815	-0.27122	0.0455018	-0.125181	-0.0927802	-0.092495
GGCACAAA	0.409605	0.461382	0.287512	0.320544	0.0942692	-0.0428495	0.294224	0.280003	0.280118	0.170646	0.216816	0.368323	0.153265	0.11252	0.38572	0.402634	0.464295	0.337433	0.281516	0.440001	0.169375	0.27791	0.0623833	0.118908	0.348242	0.177299	0.400302	0.238664	0.0274034	0.0900075	0.101219	0.189634	0.22516	0.314304	0.193479	0.196961	0.0445776	0.0417764	0.0194588	-0.0898236	0.151969	0.195501	0.122019	0.194368	0.0124498	0.129606	-0.000490867	0.129812	0.062889
AAATTGTG	0.365504	0.450992	0.0607858	0.20821	-0.0440492	-0.120831	0.310097	0.325555	-0.182102	0.0818488	0.393975	0.421233	0.0533942	0.216087	0.170826	0.343645	0.435029	0.354003	0.192505	0.432492	-0.125026	-0.0354263	-0.019576	0.124927	0.304727	0.121853	0.415262	-0.0127343	-0.0614982	0.0224093	-0.0689676	-0.209909	0.187206	0.124976	-0.0220879	-0.099091	0.0417781	-0.0313295	-0.180967	-0.0113362	-0.180134	0.053961	-0.0700506	0.00485669	-0.118509	-0.0478623	-0.0386073	-0.218111	-0.136552
TGGGCACA	0.390402	0.391535	-0.0703447	0.208281	-0.0347556	-0.00954922	0.323271	0.312311	-0.19393	-0.038282	0.322538	0.43264	-0.0553491	0.117641	0.198119	0.366356	0.440682	0.348605	0.140253	0.456114	-0.294692	0.0103511	-0.148812	0.197994	0.233654	0.132537	0.409273	-0.0291081	-0.223359	0.020788	-0.253165	-0.135067	-0.211407	0.0742071	-0.218442	-0.1266	-0.159346	0.0854285	-0.273518	-0.00418965	-0.0669978	-0.0831158	-0.132698	0.119897	-0.242946	0.0575465	-0.119044	-0.156067	-0.0676948
AGGCACAA	0.225565	0.26047	0.179912	0.0736958	0.022317	-0.0808085	0.194211	0.0774207	-0.0508347	-0.0985618	0.176267	0.0580056	0.3185	0.310342	0.256928	0.222302	0.344984	0.132804	0.293383	0.456437	-0.0628286	-0.234486	0.115246	-0.000158372	-0.038759	-0.0488646	-0.0658006	-0.0248849	-0.0149106	-0.00225471	0.182153	0.0409876	-0.067643	-0.0586536	0.124832	0.128611	0.175064	0.291827	0.173616	0.318561	0.0698182	-0.00215004	0.156981	-0.0231372	0.170397	0.183145	-0.0138997	-0.030449	0.173744
CTATGACC	0.362121	0.30349	0.290469	0.318385	0.249116	-0.0364811	0.397129	0.255164	0.234177	0.0786193	0.333008	0.229438	0.214579	0.310389	0.392961	0.363101	0.409065	0.340882	0.378236	0.45569	0.175458	0.153945	0.0261447	0.267135	0.185671	0.169111	0.216604	0.133065	0.227866	0.0372481	0.170393	0.176292	0.212053	0.168294	0.0608257	0.103222	0.099238	-0.115243	0.180953	0.106901	0.218359	0.0471533	0.120583	0.130058	0.176695	0.166048	0.146533	0.201874	0.218284
GATTGTGA	0.331147	0.412705	0.306023	0.262444	0.0248542	-0.0293972	0.339347	0.407289	0.111385	0.165188	0.278456	0.337017	0.255528	0.288045	0.296632	0.438387	0.417678	0.434749	0.329542	0.45458	0.0759071	0.244143	0.119404	0.153393	0.270433	0.230246	0.3139	0.164657	0.0908688	0.111465	0.0902893	0.0999274	0.0624417	0.181839	-0.017652	0.29529	-0.0239564	0.0513431	0.16479	0.243408	0.252116	0.158783	-0.0166121	0.215561	0.0818019	0.196131	0.108679	0.0948557	0.199183
TATTGTGA	0.368072	0.334071	0.232501	0.366358	-0.0981807	-0.0494579	0.384116	0.291045	0.164394	0.0744091	0.23816	0.210495	0.190023	0.225691	0.337468	0.425309	0.457158	0.376988	0.384838	0.464341	0.213846	0.111274	0.060675	0.200094	0.295106	0.0572385	0.13272	0.297417	0.0444094	0.115692	0.0653532	0.125845	0.0867245	0.22114	0.158562	0.233436	-0.0248224	-0.0147676	0.13916	-0.0382119	0.154076	0.227857	0.172731	0.175932	-0.0392004	0.156968	0.0974639	0.144961	0.266259
TCACAAAA	0.362182	0.40504	0.317275	0.328425	0.0822737	-0.0229759	0.393014	0.337055	0.205105	0.184143	0.325561	0.377907	0.228709	0.197028	0.422513	0.396276	0.460318	0.371745	0.414129	0.40986	0.221272	0.12991	0.25644	0.149462	0.290526	0.138662	0.326604	0.150387	0.120565	-0.118575	0.131476	0.091937	0.336757	0.218466	0.26656	0.246895	0.0903314	-0.0852515	0.177021	0.171913	0.271446	0.168662	0.16103	0.210319	0.0635415	0.0165676	0.103781	0.00730317	0.133013
AATTGTGA	0.427507	0.417397	0.356863	0.14531	0.0645644	-0.101637	0.454736	0.433779	0.125675	0.0754231	0.387489	0.195158	0.218867	0.0121671	0.391718	0.349393	0.400219	0.305509	0.340241	0.427833	0.193439	0.171143	0.227579	0.0546409	0.167364	0.0588192	0.229458	0.228719	0.12648	-0.150307	0.152606	-0.140671	0.241864	0.10641	0.345851	0.335951	0.19141	0.066949	0.353345	0.145246	0.274589	-0.0431058	0.036687	0.05904	0.298661	0.00588961	0.068828	-0.150585	0.136121
ATGTGACA	0.438915	0.441191	0.198742	0.116694	-0.0390889	-0.0560926	0.456649	0.425515	0.0167382	-0.0916214	0.32784	0.197508	0.18796	0.0478433	0.350707	0.386708	0.379734	0.249731	0.31162	0.454801	0.0179951	0.0399852	-0.0994669	0.0692764	0.0462172	-0.0201289	0.0958625	0.132646	0.0603045	-0.109044	-0.070666	0.0232606	-0.0350335	-0.141005	-0.013372	0.0487659	0.0619337	-0.0964638	0.0057714	0.204604	-0.017363	-0.216749	-0.0813216	-0.0237752	-0.0860149	-0.0892407	-0.115243	-0.132057	0.102993
GGTGTGAC	0.434403	0.413802	0.351635	0.311998	0.00318123	-0.161261	0.476582	0.44911	-0.0493763	0.131054	0.320883	0.372508	0.144425	0.125971	0.429064	0.390865	0.418781	0.365014	0.415703	0.462878	0.13623	0.189576	0.0237418	0.0873963	0.198611	0.222274	0.274312	0.100053	0.0932527	-0.0280824	0.092025	0.021282	0.131731	-0.0255439	0.217942	0.126973	0.00141823	0.0451053	0.133675	0.257508	0.0639074	0.0103789	0.135002	0.0308116	0.154098	0.0531982	0.0370729	-0.111976	0.0425589
GTCACATA	0.446613	0.46355	0.130778	0.357442	-0.255909	-0.0888697	0.472275	0.471243	-0.304191	0.00716538	0.281046	0.278272	0.113341	0.147808	0.379381	0.442076	0.407505	0.393411	0.407162	0.486789	-0.244977	-0.0320338	-0.170115	0.0352285	0.100857	-0.0506981	0.15259	-0.116685	-0.142946	0.0163039	0.0962485	0.157951	-0.164782	-0.120343	-0.0775506	0.0324595	-0.00493533	0.151134	0.0494558	0.426096	-0.265561	0.0333103	-0.0130875	0.0370398	0.0758472	0.193565	-0.128651	-0.0112091	0.164891
GGTCACAC	0.448196	0.410039	0.244233	0.256175	0.00757192	-0.283565	0.483204	0.454414	-0.09892	-0.0351705	0.34418	0.377186	0.257602	0.0992557	0.348588	0.353703	0.462916	0.340795	0.4279	0.457708	-0.15784	0.0641507	0.0349371	0.0805287	0.184488	0.158994	0.122682	-0.0170501	0.0809061	0.120661	0.187183	0.193701	0.043072	0.0972524	0.322861	0.17097	0.00468376	0.193286	0.16162	0.440018	0.0480299	0.0117428	0.203249	0.126242	0.144012	0.214463	0.10271	0.068027	0.182087
ATGTGACC	0.404957	0.398958	0.192509	0.207457	-0.242946	-0.135655	0.449525	0.42761	-0.254516	-0.039621	0.282954	0.17883	0.230434	0.139971	0.400291	0.380713	0.458421	0.279789	0.410663	0.469802	-0.118575	-0.0579912	-0.0325904	0.121716	0.190379	-0.0289296	0.103652	-0.19431	-0.0499405	-0.155284	-0.0871791	-0.237986	-0.0416312	-0.0119986	0.0602627	0.0287943	-0.163451	-0.0306554	0.243046	0.470017	-0.1451	-0.00748623	0.09211	0.0649703	0.00739858	-0.0440327	0.0394596	0.0435184	-0.0397519
GGGTCACA	0.440147	0.417558	0.209711	0.119224	-0.130452	-0.217005	0.457823	0.397063	-0.0198222	-0.0417592	0.26296	0.188238	0.274262	0.179367	0.425861	0.360636	0.480322	0.310706	0.450192	0.483234	0.049041	-0.163264	-0.18962	-0.0601819	0.16646	-0.0649049	0.0918299	0.0380501	0.00273936	0.0821891	0.239739	0.175282	0.0208368	-0.0506779	0.0882893	-0.0336948	0.0684907	0.0870511	0.265988	0.436543	-0.131966	-0.184466	0.133007	0.0565266	0.192687	0.0549661	0.172375	-0.0417109	0.167555
CTGTGACC	0.440521	0.436848	0.321122	0.357084	0.0409803	-0.231336	0.473557	0.453083	-0.0490479	0.0203654	0.318261	0.297339	0.238287	0.0987961	0.411269	0.414683	0.489168	0.407589	0.42127	0.470596	0.129325	0.14786	0.0159493	0.152761	0.22254	0.0231207	0.183684	0.058125	0.0176439	-0.0787394	0.0895141	0.0613927	0.226856	0.0994314	0.279958	0.259995	0.0486493	0.0430278	0.0272541	0.195268	0.0406259	0.116103	0.0426801	0.0428522	0.179505	0.142828	0.0063378	-0.0634235	0.116478
AATGTGAC	0.449115	0.454911	0.148376	0.336738	0.0210384	-0.0228451	0.467609	0.423017	0.0508936	-0.0298752	0.305416	0.366079	0.226678	0.277148	0.385256	0.422603	0.469125	0.395942	0.429299	0.491019	0.00629436	0.0693199	-0.23279	-0.0342479	0.2179	0.034482	0.167258	0.149992	0.155182	0.181045	0.122447	0.0581712	-0.0940452	-0.0633327	0.147683	-0.00760279	0.0352077	0.12606	-0.0401892	0.303766	0.0481817	-0.0708367	0.217979	-0.0351107	-0.0460629	0.069118	0.0167172	-0.064411	0.222291
CGGTCACA	0.458209	0.458439	0.404075	0.320853	-0.0549765	-0.110791	0.469253	0.436545	0.246686	0.122675	0.245842	0.250373	0.278748	0.2079	0.415428	0.434359	0.4704	0.380075	0.465268	0.488787	0.185399	0.0208287	0.0965221	0.0718188	0.368941	0.0992184	0.106828	0.298753	0.136867	0.101543	-0.000758302	0.23051	0.0969027	-0.0220679	0.174491	0.170978	0.168349	0.208439	0.214036	0.272653	0.183088	0.0645868	0.185672	0.119804	0.137183	0.0680023	0.0182965	0.0750525	0.0583876
ACTGTGAC	0.467782	0.470943	0.397456	0.333086	0.0975475	-0.056472	0.478838	0.457738	0.0687511	0.0780094	0.320854	0.278014	0.289067	0.205446	0.448489	0.455625	0.462164	0.35312	0.460693	0.486059	0.112695	0.0111199	0.110703	0.0339744	0.37232	0.0142045	0.181922	0.186173	0.136186	-0.132514	0.0920513	0.086149	0.0496741	-0.023697	0.0757786	0.134241	0.0328949	0.134502	0.140364	0.114286	0.093352	-0.0427451	0.0289359	0.0217719	0.0555689	0.012256	-0.0318541	-0.0802204	0.146673
AGTGTGAC	0.46866	0.475169	0.36554	0.375961	0.117593	-0.129243	0.441462	0.4145	0.106827	0.000807743	0.353426	0.323307	0.205526	0.244678	0.431631	0.459037	0.402793	0.301215	0.441721	0.486161	0.229159	0.0393866	0.0948538	-0.00613627	0.120896	0.0999782	0.258224	0.236826	0.139099	-0.202641	0.0543091	-0.0700172	0.246956	0.0220229	0.329005	0.389518	0.221898	0.0626662	0.222935	0.259691	0.210973	0.227753	0.133398	0.0095579	0.16087	-0.0849855	0.0408756	-0.0324379	-0.0035004
GTGTCACA	0.407321	0.441785	0.0326387	0.250055	-0.141567	0.0951887	0.448886	0.444944	-0.0877352	0.11704	0.225265	0.326958	0.204767	0.292012	0.426537	0.474108	0.4382	0.405108	0.478004	0.491973	-0.0926381	0.0395069	-0.138405	0.174592	0.0410948	-0.0737575	0.227178	-0.0182378	-0.106449	-0.0322439	-0.332331	-0.0731548	-0.167366	-0.0392503	-0.00712801	0.136647	-0.107314	-0.150031	-0.104866	-0.062408	-0.133348	0.0213561	-0.198716	0.0396743	-0.274715	-0.119111	-0.18962	-0.142022	-0.224642
GAGTCACA	0.410734	0.452668	0.2786	0.280123	0.0666382	-0.0510213	0.462706	0.456811	0.254534	0.0655972	0.423514	0.458101	0.398298	0.43219	0.427736	0.475239	0.476615	0.412484	0.47242	0.493035	0.248582	0.0910218	0.192181	0.081596	0.342407	0.158301	0.326577	0.270194	0.182494	-0.0179565	0.217688	-0.0317213	0.195262	0.150011	0.260879	0.275027	0.195055	-0.00948239	0.25875	0.274207	0.27756	0.0231604	0.133983	0.0130214	0.0884885	0.0214069	0.147159	0.050928	0.215838
GTCACAAC	0.454731	0.452095	0.306746	0.332215	-0.0444764	-0.178781	0.465139	0.463546	-0.107988	-0.0772278	0.353054	0.429982	0.340215	0.303121	0.395999	0.438968	0.483752	0.394648	0.477271	0.488919	0.0313051	-0.0120393	-0.0164179	0.0592323	0.209009	0.0439463	0.232927	0.0165382	-0.161261	0.0494727	-0.185699	0.0212146	-0.130803	0.0388698	-0.101592	0.0944771	-0.147756	0.027946	-0.0403491	0.110236	-0.0875127	-0.0254084	-0.101457	0.134937	-0.258838	0.0137683	-0.224336	-0.117198	-0.0225422
CAGTCACA	0.452062	0.429807	0.301134	0.271726	0.067278	-0.241567	0.43349	0.376795	0.128283	-0.0699857	0.229906	0.229598	0.287705	0.253262	0.444065	0.410129	0.487326	0.368005	0.468405	0.483063	0.171037	-0.14828	-0.0579849	0.0153494	0.19248	0.0390045	0.196553	0.206643	0.0148198	0.0623117	0.107444	-0.119246	-0.00703594	-0.0536763	0.170247	-0.0486467	-0.0456917	0.0349411	0.104599	0.217696	0.0359547	0.00249152	0.106696	0.0913109	0.0861068	0.0824023	0.152235	-0.107212	0.14647
GTCACAGA	0.428093	0.389079	0.336258	0.268184	0.231132	-0.00463587	0.467212	0.398386	0.143467	-0.0927239	0.406195	0.263295	0.41387	0.350123	0.427324	0.443916	0.467538	0.303533	0.450183	0.47625	0.111202	0.106102	0.109709	-0.00161988	0.29223	-0.031989	0.163013	0.189905	0.0294964	-0.0196766	0.0955074	0.049809	0.100918	0.0584211	0.201309	0.20721	0.215048	0.144543	0.206009	-0.0384597	0.156331	-0.0368279	0.16704	0.122313	0.235162	0.118157	0.0609089	0.0836111	0.155504
CTTGTGAC	0.445642	0.403285	0.371933	0.0340738	0.120189	-0.00382231	0.477414	0.426773	0.261973	0.0714919	0.394262	0.0889544	0.3215	0.18755	0.459966	0.412362	0.475615	0.325334	0.476097	0.469288	0.218627	0.00635308	0.246125	-0.0223544	0.198033	0.140196	0.118442	0.315455	0.282933	-0.0582641	0.18003	-0.0614807	0.266893	0.0816803	0.270519	0.107209	0.22445	0.0676492	0.312623	0.146722	0.363956	0.0291575	-0.0078721	0.0185667	0.279558	-0.0310199	0.180436	-0.0104493	0.229618
ATGTCACA	0.449807	0.421174	0.268451	0.292964	-0.176195	-0.186967	0.488923	0.473662	-0.232239	-0.0794049	0.257659	0.39872	0.203072	0.235472	0.454172	0.431092	0.480132	0.444651	0.475391	0.479006	-0.0474553	0.176192	-0.13363	0.14704	0.158278	0.192569	0.240391	0.0168289	-0.132148	0.0221584	-0.114086	0.102207	-0.0247196	0.0993625	0.0962479	0.119603	-0.15391	-0.0414737	0.0724465	0.135201	-0.183565	0.145936	0.0367025	0.124885	-0.141794	0.0366871	-0.239041	-0.121681	-0.0213942
AGTCACAT	0.469811	0.458505	0.372336	0.27616	-0.0895793	-0.231785	0.481881	0.457599	-0.0109901	-0.0804804	0.405748	0.40131	0.365603	0.301801	0.455391	0.440807	0.484751	0.447627	0.474135	0.488587	0.0336569	-0.104915	0.113512	0.0262883	0.310442	0.115963	0.175798	0.183478	0.0668358	-0.0406912	0.40644	0.438407	0.0596943	0.0722255	0.20575	0.217996	-0.120761	-0.105453	-0.0152325	0.184721	-0.030003	0.0468714	0.234742	0.208662	0.298626	0.145124	0.31727	0.167152	0.422907
TGGTCACA	0.456695	0.445816	0.374332	0.259816	0.214607	0.0960059	0.467444	0.402173	0.334275	0.0431936	0.443988	0.364942	0.395067	0.333408	0.480565	0.467841	0.484097	0.417697	0.489485	0.490546	0.327072	0.164284	0.267787	-0.017468	0.341613	0.18401	0.224657	0.326791	0.290281	-0.0352346	0.158264	-0.0457654	0.314545	0.12838	0.307375	0.264483	0.312082	0.0658096	0.260805	0.0612752	0.347691	0.230401	0.277858	0.0348724	0.239183	-0.0373904	0.186603	0.0420572	0.239304
TGTCACAA	0.475063	0.467312	0.369346	0.32957	-0.103292	-0.124033	0.493283	0.484545	0.0920673	0.0749022	0.321276	0.364905	0.287385	0.231157	0.476001	0.483209	0.487398	0.349238	0.489984	0.490028	0.183066	-0.0119783	0.0555638	0.131162	0.409669	0.0402002	0.328405	0.175177	-0.00293542	0.0260994	-0.03466	-0.0327532	0.00653134	-0.0822469	0.0381828	-0.0283425	-0.0865507	-0.118243	0.102648	0.0410806	0.00242529	-0.068611	-0.12652	0.142782	-0.0196145	-0.0714497	-0.277728	-0.147625	0.0808674
AGTCACAC	0.468676	0.478998	0.38334	0.425597	-0.0902333	-0.127491	0.481639	0.472133	-0.155284	0.00694291	0.363098	0.389618	0.210729	0.239435	0.443138	0.477793	0.477712	0.376144	0.47511	0.488014	0.0869637	0.0783098	0.143016	0.0595441	0.367299	0.108275	0.31714	0.120032	0.0157177	0.0299929	0.0165559	-0.150864	0.0842339	0.00909011	0.2548	0.103798	-0.00303684	-0.111464	0.012933	0.245686	-0.0710797	0.099201	0.011682	0.161841	-0.0211895	0.078981	0.0881657	0.0303343	0.135758
GTCACACA	0.450115	0.454687	0.239726	0.283984	-0.184771	-0.144249	0.466289	0.477575	-0.0513548	0.118408	0.151762	0.343828	0.287974	0.331738	0.452062	0.477313	0.478229	0.408561	0.4902	0.493567	-0.125104	0.0740648	-0.0644156	0.150381	0.158536	0.125988	0.278345	-0.00791997	-0.250864	0.2064	-0.167985	0.0145287	-0.206753	-0.0049884	-0.0830637	-0.075134	-0.160206	0.0213546	-0.164782	0.035512	-0.0381525	0.0501082	0.0292234	0.117162	-0.139903	-0.00157919	-0.155596	-0.0457876	-0.0112752
AGTCACAG	0.44615	0.45096	0.239814	0.247023	-0.128567	-0.263078	0.489189	0.482145	-0.176447	-0.0784294	0.259395	0.334632	0.284393	0.315135	0.428343	0.481849	0.479454	0.445669	0.477838	0.49334	-0.234008	-0.0137449	-0.155596	0.00535356	0.154536	-0.0633605	0.193563	-0.150031	-0.21707	0.0853297	-0.00952169	0.0241323	0.0833772	0.21244	0.150965	0.204537	0.31119	0.410682	0.428796	0.466487	-0.157512	0.016235	-0.0838719	0.122271	0.277107	0.404174	-0.188941	-0.0720506	0.000332092
AGGTCACA	0.4723	0.446604	0.346362	0.362136	-0.219654	-0.269897	0.495318	0.492192	-0.0102503	0.120261	0.2925	0.416351	0.343444	0.33778	0.483372	0.480123	0.494074	0.44518	0.495844	0.490321	0.242048	0.181977	0.0374383	0.137176	0.389405	0.234467	0.388941	0.220741	-0.0600456	0.0774866	0.135771	0.0773288	0.0516288	0.087045	-0.00900676	-0.0104887	-0.12668	-0.0781412	0.0713744	0.113158	-0.118177	0.0988002	-0.0420834	0.249289	0.0443562	0.0710457	-0.234294	-0.0667867	0.179594
TAGTCACA	0.463948	0.475215	0.27423	0.399932	-0.0840231	-0.177469	0.49513	0.493736	-0.113787	0.112176	0.191286	0.436071	0.393766	0.425478	0.497623	0.498326	0.49007	0.463131	0.495323	0.496865	-0.244491	0.105593	-0.0827064	0.24935	0.314641	0.172227	0.323343	0.12811	-0.265758	0.20653	-0.248678	0.0677015	-0.139469	0.143215	-0.0151807	0.0547455	-0.0531179	0.024789	0.0382846	0.0967879	-0.0193122	0.0552162	0.0101367	0.200751	-0.0409584	0.148096	-0.190658	0.0341885	-0.152143
AAGTCACA	0.453926	0.463465	0.340543	0.418606	0.00432345	-0.064145	0.481913	0.477453	0.0283962	-0.146597	0.428802	0.468843	0.416412	0.426355	0.475306	0.494174	0.494022	0.484804	0.492775	0.49733	-0.021949	0.134911	0.0407446	0.121902	0.343891	0.128937	0.287532	0.0944388	-0.0214833	-0.0719422	0.185757	0.17465	0.140015	0.227796	0.301589	0.30883	0.174062	0.212002	0.268948	0.384276	0.0733971	0.0924687	0.177911	0.166452	0.24255	0.276744	0.0888878	0.103822	0.293656
GGTCACAA	0.454342	0.46256	0.390345	0.431036	0.106062	-0.00822467	0.476478	0.46037	0.127098	0.141688	0.43194	0.457537	0.383242	0.401547	0.484515	0.49357	0.493582	0.482867	0.490868	0.49618	0.205034	0.15817	0.144586	0.161697	0.310647	0.170015	0.310871	0.240406	0.132404	-0.0355002	0.0425683	0.064233	0.149931	0.0957856	0.145963	0.302932	0.148563	-0.100745	0.21603	0.182537	0.136884	0.168997	-0.0194437	0.139331	0.0770684	0.0738833	0.0310538	-0.0438456	0.16299
ATTGTGAC	0.449453	0.467025	0.277165	0.465574	-0.00375767	-0.0604459	0.487239	0.48992	-0.0460837	0.172629	0.402651	0.481682	0.4255	0.451958	0.495623	0.49885	0.495083	0.479053	0.496842	0.498998	0.0479843	0.152964	-0.0445622	0.227996	0.305224	0.132209	0.360112	0.198427	-0.13536	0.104075	-0.145842	0.0522624	-0.06002	0.204349	-0.0988252	0.240952	2.79162e-05	-0.000987968	0.0464683	0.0956497	-0.115243	0.0462798	-0.268825	0.203335	-0.123882	0.13751	-0.204624	0.0580144	-0.0216828
AGTCACAA	0.466637	0.473774	0.39057	0.481946	-0.135952	-0.00877051	0.481183	0.478589	0.0639584	0.0251831	0.421803	0.472734	0.396871	0.421142	0.496648	0.498097	0.496905	0.490595	0.496762	0.498274	0.106496	0.196032	0.0678693	0.232535	0.386005	0.0960019	0.357853	0.230745	0.015523	0.0919123	-0.000479537	0.128768	0.260867	0.298187	0.27672	0.333859	0.195723	0.15568	0.283019	0.276747	0.15797	0.239764	0.159476	0.202436	0.183204	0.198775	0.0729079	0.0926474	0.224464
GTCACAAA	0.490902	0.490178	0.405815	0.478809	-0.0105173	0.0318832	0.319461	0.176781	0.0805245	0.199963	0.483644	0.490579	0.41133	0.355155	0.457735	0.48762	0.488511	0.403274	0.492815	0.493186	0.193848	0.161222	0.0378671	0.143686	0.451049	0.0758098	0.444225	0.388808	0.091317	0.0822603	-0.0272761	-0.00495573	0.155533	0.127412	0.216561	0.121614	0.264247	0.147948	-0.0253929	0.11871	-0.0552492	-0.230016	0.00652614	-0.00860305	-0.0843405	0.154957	0.04421	-0.0185418	-0.188273
GGACACAA	0.477465	0.488532	0.379304	0.491216	0.0324663	-0.0674051	0.256751	0.284757	0.246419	0.233118	0.397542	0.490981	0.361994	0.379145	0.454525	0.495674	0.48643	0.438707	0.468497	0.495755	0.173341	0.291222	0.0407474	0.304361	0.379508	0.185921	0.44637	0.377125	0.152327	0.0681839	0.182076	0.132505	0.145637	0.294142	0.205309	0.340347	0.159872	0.0279226	0.112312	0.261019	0.161124	0.178207	0.1538	0.260098	0.196358	0.208887	0.0807915	0.0845438	0.107277
GACACAAA	0.454812	0.461794	0.439399	0.453448	0.203888	0.107365	0.2046	0.302246	0.212343	0.235044	0.358178	0.445051	0.327905	0.242376	0.460398	0.469829	0.481527	0.424592	0.448198	0.475782	0.336771	0.33877	0.300724	0.317098	0.435026	0.195306	0.402189	0.390756	0.248991	0.221402	0.0923803	0.102714	0.244976	0.319933	0.221656	0.256992	0.157829	0.0869009	0.164171	0.108095	0.195869	0.140714	0.283453	0.224999	0.25829	0.241342	0.225155	0.221786	0.061181
ACACAAAA	0.476878	0.490795	0.378529	0.414579	-0.00928064	-0.0926135	0.28262	0.167087	0.124986	-0.0321458	0.440635	0.475936	0.347968	0.209761	0.417708	0.410511	0.477857	0.272966	0.436103	0.480663	0.21049	0.134698	0.0945822	-0.0195865	0.375975	-0.0593509	0.412388	0.348677	0.183342	-0.0570964	0.177744	-0.126841	0.215594	-0.0466971	0.194488	0.12185	0.173641	-0.0464037	0.068166	0.00452498	0.0682253	-0.249621	0.176029	-0.0455308	0.107878	-0.149485	0.101811	-0.176447	0.0644405
TGGACACA	0.455513	0.467521	0.252959	0.448452	-0.183863	-0.0193386	0.10108	0.221889	-0.052677	0.178695	0.281155	0.489069	0.334906	0.357385	0.329475	0.478194	0.477665	0.382022	0.360437	0.488997	0.00347074	0.284481	-0.0674722	0.246874	0.327347	0.148921	0.41191	0.184965	-0.28962	0.0486467	-0.120273	-0.0592419	-0.131605	0.114284	-0.0913957	0.146107	-0.153018	-0.0613819	-0.0515091	0.113162	-0.110073	0.0150836	-0.186012	0.0014775	-0.0863454	0.11712	-0.201773	0.0961976	-0.012843
AGACACAA	0.462305	0.47475	0.361094	0.395573	-0.0517594	0.101684	0.207416	0.259213	0.133085	0.232014	0.362183	0.46509	0.287421	0.315414	0.334696	0.463121	0.451935	0.375162	0.358808	0.482782	0.213899	0.17504	0.0458735	0.155629	0.384262	0.194601	0.393082	0.327679	0.0211585	0.139372	-0.0835314	-0.087194	0.186819	0.246117	0.179179	0.215024	0.0816531	0.0546472	0.162711	0.117955	0.119295	-0.0492958	0.0150942	0.0428961	-0.0293027	0.11662	0.0779509	-0.016909	0.0589839
ATTGTGTC	0.448935	0.430095	0.374472	0.373996	-0.0251425	0.15688	0.348118	0.33788	0.242733	0.0490061	0.297351	0.350784	0.280268	0.122711	0.441568	0.447519	0.491156	0.392229	0.411956	0.475518	0.370501	0.303989	0.244153	0.280986	0.462742	0.106507	0.354371	0.42399	0.198633	0.158505	0.0937646	0.148451	0.389815	0.339318	0.245662	0.239532	0.0326123	0.049716	0.154065	0.0901414	0.178971	0.19442	0.10453	0.210601	0.135534	0.23845	0.17143	0.136406	0.243485
ATTTTGTG	0.379789	0.419388	0.380318	0.391662	0.0141174	-0.0542259	0.400628	0.383504	0.0944236	0.0872183	0.399707	0.387598	0.305428	0.257175	0.38921	0.43082	0.480032	0.425225	0.39554	0.464279	0.0942775	0.167857	0.134555	0.133987	0.321916	0.0248776	0.314897	0.198223	0.0586882	0.0582627	0.0482163	0.0436462	0.127164	0.0848474	0.16812	0.27464	0.151847	-0.0317856	0.199518	0.113403	0.197654	0.0610928	0.0495041	0.1127	0.0557045	-0.00922958	0.113509	-0.0455145	0.0906457
CGTCACAA	0.433391	0.407792	0.363926	0.259392	0.135473	-0.0948516	0.416782	0.203218	0.057843	-0.0804956	0.417027	0.255615	0.419617	0.377799	0.408783	0.40122	0.465514	0.169982	0.456767	0.481073	0.0571853	-0.132239	0.100904	-0.207212	0.345129	-0.0152651	0.0233951	0.0948706	0.231103	0.00873696	0.364504	0.345071	0.36198	0.213589	0.361081	0.301681	0.0455805	-0.162709	0.16293	-0.16925	0.305127	0.157899	0.213168	-0.0669899	0.274116	0.151355	0.363257	0.282479	0.457142
GATCACAA	0.301918	0.34484	0.120838	0.260157	-0.00379031	0.202337	0.27911	0.24683	0.0424543	0.108389	0.117917	0.339047	0.448127	0.445205	0.416065	0.466292	0.465392	0.414035	0.477148	0.490678	-0.0673277	0.119177	-0.0749165	0.123469	0.00987212	0.140618	0.125493	0.145617	-0.0223378	0.0828531	0.0738686	0.143046	-0.0579906	0.193226	0.131532	0.257094	0.177441	0.169027	0.220861	0.180138	0.056984	0.233274	0.122334	0.139936	0.0594217	0.149943	-0.0894432	0.144616	0.0876869
GTCATAAA	0.253497	0.295281	0.180981	0.258348	0.00261495	0.0342927	0.387976	0.29173	0.0914491	0.194192	0.327562	0.375634	0.470404	0.462057	0.477117	0.482115	0.473894	0.36663	0.491144	0.491076	-0.0123179	0.096462	0.0869978	0.178497	0.0766217	0.216152	0.219261	0.0550661	-0.0195983	0.0653939	0.195722	0.126043	0.00297477	0.0536743	0.012473	0.212163	0.203421	-0.0842199	0.0950939	0.0769446	0.129895	0.144668	0.145813	0.157309	0.188714	0.0977683	-0.113966	0.190287	0.195619
AGTCATAA	0.317741	0.340957	0.219856	0.298294	0.0278556	0.0117607	0.343968	0.296672	0.0328248	0.19597	0.380262	0.396633	0.447662	0.447117	0.439651	0.468679	0.437587	0.366054	0.460232	0.484615	0.0035583	0.125283	0.0147931	0.207856	0.0537952	0.246087	0.25556	-0.0540142	0.0701437	0.0912232	0.107463	0.200523	0.125932	0.268853	0.193691	0.376608	0.214409	0.132283	0.140312	0.327658	0.097965	0.241303	0.0277184	0.146784	0.0797815	0.246918	0.0532258	0.1825	0.149722
ATTATGAC	0.291272	0.254608	0.162726	0.197126	0.0359657	0.0143667	0.389802	0.271011	0.177822	0.192395	0.27446	0.178419	0.437	0.404713	0.427228	0.456803	0.388111	0.299465	0.460762	0.467173	0.0246404	0.071258	0.162413	0.132046	0.19017	0.155324	0.0602807	0.269985	0.0436015	0.0710139	0.127098	0.0253236	0.081474	0.165688	0.105386	0.139204	0.187613	0.0861549	0.232027	0.17685	0.156996	0.0209449	0.150775	0.13002	0.12775	0.189127	0.12455	0.153072	0.187779
AAGTCATA	0.23778	0.270017	-0.00308572	0.192653	-0.209151	-0.0533379	0.251848	0.2385	-0.0161259	-0.0307817	0.149727	0.314313	0.455719	0.458572	0.367126	0.442583	0.393632	0.317024	0.450501	0.486431	-0.134199	-0.128233	-0.130452	0.18417	-0.0743352	0.13795	0.157244	-0.140561	-0.034762	0.0482022	0.0849486	0.21373	0.0736342	0.253586	0.0291848	0.245064	0.158758	0.22311	0.213474	0.416247	-0.0480033	0.151568	-0.0332054	0.110233	0.0876345	0.295951	-0.0722762	0.154974	0.136463
GGTCATAA	0.0509383	0.224681	0.07544	0.244075	-0.0924614	-0.195861	0.149555	0.239797	0.0965081	-0.114448	0.222666	0.337238	0.45471	0.456204	0.379985	0.375773	0.258391	0.241652	0.439648	0.468581	0.0984419	0.0798975	0.0283578	0.15933	-0.0574155	0.14516	0.178882	0.0382933	0.088863	-0.034431	0.0738984	0.0610099	0.151234	0.0332472	0.172642	0.0784924	0.0609993	0.134737	0.115956	0.193986	-0.0432984	-0.00791689	-0.11463	0.231385	0.0545557	0.15407	-0.0105916	-0.0215485	0.144183
CTTATGAC	0.307014	0.382893	0.150785	0.32355	-0.0447736	-0.00338066	0.191487	0.292164	0.0291008	0.092261	0.131268	0.363513	0.444386	0.451666	0.349345	0.448382	0.317561	0.396611	0.379728	0.481881	0.112239	0.20429	-0.0141987	0.223022	0.0563695	0.313325	0.216595	0.107526	0.0400932	0.0505557	0.0121517	0.0725684	0.0917986	0.313438	0.289471	0.336671	0.150435	0.10831	0.10836	0.158335	0.0580285	0.262919	-0.0741076	0.152331	0.0399364	0.139371	0.0220586	-0.098464	0.0532945
TGTCATAA	0.406539	0.410125	0.300753	0.365014	-0.254821	0.062239	0.372219	0.305451	0.149713	-0.0785747	0.246049	0.411505	0.362139	0.381268	0.385562	0.4475	0.436793	0.377245	0.417511	0.476442	0.178465	0.1166	0.111159	0.245054	0.37589	0.310867	0.251854	0.0556258	-0.0380778	-0.0782227	0.0596403	0.177201	0.0656504	0.287756	0.143865	0.271473	-0.0340321	-0.0679021	-0.068532	0.128358	0.0197769	0.264421	0.127592	0.328103	0.0241652	0.158838	0.00776553	0.192629	0.184372
AATCACAA	0.34254	0.420035	0.358721	0.407216	0.13897	-0.0447677	0.389148	0.32989	0.144104	0.211782	0.357734	0.378375	0.218779	0.352964	0.400493	0.444373	0.42996	0.348073	0.330832	0.468887	0.122132	0.215006	0.147899	0.219341	0.353749	0.308284	0.295171	0.0671098	0.079421	-0.0172752	0.274846	0.342035	0.197171	0.32511	0.175512	0.328495	0.0478426	0.031835	0.17626	0.162653	0.287429	0.263366	-0.0554798	0.253368	0.105003	0.215469	0.109541	0.245522	0.276515
ATCACAAT	0.406314	0.436844	0.055328	0.159498	-0.264397	-0.161979	0.411243	0.348878	-0.11831	-0.060359	0.129766	0.326932	0.154227	0.30797	0.284203	0.42245	0.360111	0.253017	0.302794	0.482465	-0.117005	-0.0265439	-0.186012	0.0215057	0.0217842	0.0334738	0.0758677	-0.0813402	-0.0991528	-0.0900803	-0.103905	0.0367658	-0.113136	-0.0630628	-0.127737	0.0071463	0.000381756	-0.188941	0.0344978	0.145465	0.0246411	0.0126988	-0.110458	0.0117414	-0.119246	-0.0379353	-0.16968	0.015125	-0.0499216
GCTGTGAC	0.433561	0.455377	0.33419	0.0972785	0.0653905	0.0514978	0.456489	0.399391	0.223708	-0.0149868	0.381238	0.304097	0.270636	0.13284	0.387074	0.443145	0.451081	0.367394	0.411529	0.482725	0.262023	0.234444	0.133561	-0.0783673	0.224959	0.0808678	0.129587	0.233212	0.265243	-0.149757	0.0425575	-0.250724	0.21883	0.00859121	0.111336	0.268897	0.2168	0.0759224	0.27239	0.0724495	0.205209	0.107043	0.110588	0.0781852	0.121395	-0.169897	0.0696167	-0.125337	0.0434932
TGTGACAA	0.457832	0.435792	0.276755	0.204832	-0.131426	-0.202411	0.430933	0.355425	0.0835157	0.0587828	0.247343	0.22357	0.273287	0.244521	0.318659	0.408321	0.458234	0.252673	0.425762	0.475043	0.0509821	0.0191442	-0.0731567	-0.00799137	0.0305256	0.0358858	0.150464	0.127379	0.0795727	-0.0929275	-0.181248	-0.0840866	0.0558623	-0.0351976	0.11013	0.18674	0.0789289	0.135645	0.147952	0.172438	0.0858689	0.0724165	-0.211748	0.0628074	-0.052637	-0.0536636	-0.09791	-0.0138766	-0.131515
CTGTGACA	0.453899	0.465145	0.373485	0.148034	0.0708188	-0.0182705	0.440718	0.397497	0.015419	-0.122695	0.336986	0.229088	0.140321	0.11972	0.392733	0.383849	0.423179	0.205778	0.403817	0.465673	0.11558	0.0430041	0.178265	-0.115243	0.172124	0.0806023	0.0460462	0.152963	0.148138	-0.218977	-0.0608557	-0.319044	0.146076	-0.15784	0.200895	0.0905845	0.0994424	-0.0165909	0.087651	0.0133294	0.0968889	-0.0450351	-0.00998935	-0.138616	-0.0514289	-0.292812	0.0638159	-0.191009	0.0549323
GTGTGACA	0.461294	0.460801	0.363968	0.366349	0.0568593	0.0475891	0.265666	0.227895	0.0222148	0.165865	0.40769	0.422841	0.387842	0.251028	0.386324	0.403642	0.403804	0.170426	0.416643	0.475425	0.0903389	0.112416	0.141039	0.143433	0.399088	0.15278	0.382219	0.293527	-0.000689767	0.0920794	0.0294891	-0.0171944	0.119362	0.142634	0.285167	0.240973	0.0863828	0.0454477	-0.00466047	0.273768	0.197805	0.0135589	0.101255	-0.0123894	0.0390262	0.0764546	0.119538	0.153755	-0.0015102
GACACAAC	0.465933	0.480849	0.331217	0.377498	-0.0585267	-0.160555	0.279079	0.243893	-0.0762808	-0.00640879	0.442342	0.442321	0.297004	0.330141	0.303317	0.427744	0.414846	0.298254	0.392124	0.48028	0.0105298	0.0551669	0.012245	0.225803	0.34426	-0.0762698	0.349479	0.0331488	0.0140788	0.154979	-0.16925	-0.123136	0.0619994	0.0546671	0.0765697	0.0613674	0.355078	0.393002	-0.0382545	0.0963433	-0.0313248	-0.102136	0.0059688	0.0464675	-0.0653229	0.0803713	0.0110604	-0.0335246	-0.0425343
AGGACACA	0.460188	0.465523	0.263128	0.374543	-0.0798442	0.0840359	0.24489	0.334568	-0.0387459	0.142868	0.344176	0.43931	0.330516	0.31004	0.310213	0.462838	0.327902	0.376732	0.293158	0.482124	0.122026	0.203399	0.000822618	0.208761	0.287771	0.246037	0.365694	0.16101	0.0228134	0.0945163	-0.0824004	0.100275	0.1012	0.246169	0.243819	0.39148	-0.0454363	0.173069	0.0721787	0.32349	0.135631	0.236753	-0.038074	0.109976	0.0944352	0.102878	-0.0564316	0.0543247	-0.0350189
TGACACAA	0.472406	0.47161	0.236634	0.430754	-0.117134	0.209395	0.221907	0.366154	-0.0657591	0.208282	0.270977	0.471026	0.183911	0.314712	0.303753	0.449858	0.432293	0.366724	0.368798	0.482372	-0.0461573	0.239532	0.0253831	0.296876	0.308537	0.117117	0.361308	0.084704	-0.0807494	0.191288	-0.107263	-0.0729084	-0.0645803	0.133077	-0.197469	0.155726	-0.233348	0.068056	0.0155551	0.191628	-0.138828	0.0173594	-0.100922	0.177489	-0.134872	0.20925	-0.158503	0.123833	-0.0619583
AAGACACA	0.448699	0.467097	0.243109	0.396067	0.0409648	0.0692357	0.237483	0.312122	0.0918323	0.168325	0.34977	0.465406	0.149481	0.163118	0.295677	0.404305	0.39557	0.291463	0.331398	0.456777	0.115807	0.287047	0.090336	0.256608	0.2169	0.196157	0.338894	0.12791	0.0966862	0.179055	0.160515	0.0331716	0.263237	0.177457	0.0782019	0.137383	0.00673488	0.0255851	0.0631541	0.18858	0.0649234	-0.0716968	0.0360131	0.0844595	-0.0271038	0.18412	-0.0464777	0.0664492	0.0868645
AGACACAT	0.449434	0.468871	0.273699	0.418349	-0.248017	-0.0191762	0.145149	0.109895	-0.0965953	-0.016117	0.325977	0.449346	0.392165	0.305326	0.196305	0.398906	0.331666	0.171417	0.202279	0.466281	0.0701762	0.245302	-0.00583226	0.13594	0.286365	0.0138635	0.3331	0.0237	-0.0831093	0.0396661	0.0767875	0.0685059	0.0496736	0.0692181	0.0707636	0.0569922	-0.136856	-0.0914492	0.00573823	0.136795	0.0227461	-0.0729981	-0.0518686	-0.108513	-0.0725339	0.034655	-0.11891	0.0610206	0.0776052
CAGACACA	0.450121	0.472327	0.196661	0.388491	-0.0786998	0.0656862	0.340833	0.3867	-0.00584438	-0.0667964	0.291015	0.326824	-0.0137634	0.0242486	0.227533	0.391909	0.340698	0.302749	0.309289	0.466112	0.092733	0.206205	0.00679326	0.0782081	0.0956322	0.131921	0.32088	0.0732977	0.0377853	0.0467247	-0.163451	-0.118046	0.10308	0.0593959	0.245957	0.318665	0.120493	0.0705083	0.210574	0.284993	0.0539222	0.0542777	-0.0455652	-0.0208112	-0.0491383	-0.103668	-0.11891	-0.0371834	-0.0400572
GTGACACA	0.463978	0.482749	0.235971	0.414265	-0.0248111	-0.110735	0.220551	0.238279	-0.0610953	-0.093767	0.0585732	0.357431	0.0269624	0.11406	0.160262	0.32876	0.288384	0.244769	0.204552	0.472348	-0.0974731	0.0776691	-0.0726552	-0.0106913	0.17718	0.142522	0.286853	-0.0148758	-0.106098	-0.0119926	-0.178252	-0.239577	-0.207935	-0.109745	-0.112784	0.00235874	0.0414575	0.0962782	-0.0991962	0.070394	-0.013104	-0.0861224	-0.097354	-0.10942	-0.113847	-0.145967	-0.202228	-0.208092	-0.197469
ACTGTGTC	0.471889	0.480135	0.23719	0.383361	-0.269037	0.188501	0.2911	0.161616	-0.305651	0.101389	0.184489	0.378669	0.192584	0.213741	0.262243	0.396433	0.334333	0.205008	0.322664	0.459676	0.0708739	0.170568	-0.0409749	0.116473	0.362823	-0.0218268	0.336892	0.105284	-0.0430015	0.00594918	-0.077654	-0.111805	-0.120482	-0.137675	-0.0161677	-0.0188626	-0.208513	-0.093404	0.103912	0.0130969	-0.23439	-0.118243	-0.107572	-0.020585	-0.0950708	0.00255545	-0.123062	-0.00478549	0.0225198
AGACACAC	0.476336	0.480606	0.299673	0.373721	-0.0709732	-0.0649849	0.174766	0.0842691	0.0227126	-0.164397	0.252878	0.383852	0.179344	0.231661	0.328788	0.328162	0.420396	0.141595	0.343415	0.471426	-0.00621082	0.0133469	-0.0263374	0.0950048	0.244479	-0.0324081	0.218638	0.0799902	-0.0153318	0.0661609	-0.0629185	-0.15986	-0.0252294	-0.108092	0.00796988	-0.120135	0.0957928	0.199881	-0.0943415	0.0812463	-0.053712	-0.186967	-0.00754799	-0.0648395	0.00184155	-0.0532453	-0.0862023	-0.088866	-0.067062
CTGTGTCC	0.48205	0.473394	0.304606	0.435348	-0.202273	-0.0784807	0.102239	0.0369779	-0.123508	0.0321009	0.274996	0.348852	0.256334	0.263859	0.264297	0.364789	0.439966	0.237751	0.401091	0.462521	0.0549849	0.0238316	-0.0671349	0.112375	0.290927	-0.0376607	0.244992	0.0719802	-0.120343	0.0908096	-0.0894497	-0.189963	0.111632	-0.0794928	0.0375853	-0.0165006	-0.221183	0.143889	0.154008	0.0204974	-0.0837498	0.0463106	-0.0914585	0.0620865	-0.127654	0.0878082	-0.0114344	-0.00676272	-0.113371
GACACAGA	0.48506	0.478836	0.305001	0.420023	-0.134679	-0.106651	0.282501	0.187998	0.0317227	0.085559	0.356879	0.39066	0.198328	0.248915	0.297597	0.377329	0.438069	0.278091	0.339976	0.452812	0.0321971	0.101727	-0.100656	0.0858663	0.380579	0.167828	0.40379	0.207081	-0.119314	0.152443	-0.274232	-0.0958351	-0.0903813	0.00297757	-0.011453	-0.0233583	0.170991	0.139902	0.00161091	0.216574	-0.173049	-0.198716	-0.224949	-0.00971343	-0.318509	0.0335188	-0.207676	-0.0124359	-0.089622
CGGACACA	0.48234	0.489293	0.36058	0.418716	-0.0808292	-0.0101719	0.385287	0.212164	-0.0902482	0.0806924	0.321248	0.402076	0.198606	0.214525	0.353555	0.395495	0.334325	0.128324	0.378271	0.461257	0.253404	0.225908	0.10589	0.123643	0.423634	0.223958	0.424333	0.273992	0.108871	0.061286	-0.0333507	-0.144733	0.0386378	-0.00733222	0.102361	0.0858149	0.0768965	0.191735	0.00512911	0.0693112	0.0535453	0.103382	0.0514026	-0.028835	0.00840784	-0.108302	0.0100049	-0.187943	-0.0100297
AGTGTGTC	0.47811	0.489275	0.409987	0.266929	0.0506657	-0.1767	0.305249	0.0419668	0.0786558	-0.191364	0.355478	0.367192	0.223827	0.0428414	0.33695	0.282449	0.347636	0.0328491	0.411258	0.436336	0.0925954	0.0250011	0.142328	-0.117328	0.393618	-0.0456322	0.342006	0.251269	-0.0310681	-0.129843	-0.0792541	-0.268194	0.00012546	-0.262893	0.0224756	-0.0850325	0.122419	0.251205	-0.00872085	-0.173755	-0.00468557	-0.340894	0.014247	-0.293181	-0.102091	-0.273993	-0.0122733	-0.270553	-0.0138796
GGACACAC	0.469415	0.481506	0.345646	0.410042	0.0228863	-0.110624	0.343087	0.313775	0.165067	0.181661	0.31726	0.343395	0.237618	0.115344	0.331484	0.375847	0.295248	0.168281	0.35136	0.429865	0.263745	0.247362	0.202692	0.182693	0.251753	0.178276	0.350723	0.216508	0.217513	0.168316	0.0613057	-0.0298185	0.112884	0.186072	0.304004	0.227282	0.270253	0.202646	0.155221	0.233811	0.240601	0.202253	0.188058	0.104546	0.0553949	0.0672439	0.109813	0.165551	0.0517553
GTGTGTCA	0.479142	0.466395	0.393953	0.342013	-0.0103187	0.0490033	0.325385	0.245874	0.0611731	0.0683654	0.329478	0.336094	0.242606	0.140453	0.366575	0.331977	0.251022	0.128477	0.36787	0.418002	0.161204	0.112511	0.198558	0.207734	0.388405	-0.102733	0.375325	0.245683	0.1128	0.153954	0.0110151	-0.15986	0.0586345	0.150655	0.181738	0.123238	0.0741845	0.0351999	0.130504	0.15468	-0.00674659	0.143562	0.0322759	0.0350379	-0.0882878	0.0114009	0.026352	0.18251	0.035651
GACACACA	0.477659	0.461307	0.389054	0.264811	0.220602	-0.0272336	0.391173	0.329584	0.319986	0.0930619	0.402209	0.212527	0.1668	-0.026581	0.325436	0.220036	0.282808	0.170965	0.321494	0.181764	0.360853	0.234653	0.304308	0.153633	0.310649	0.0960891	0.270478	0.292244	0.307768	0.266743	0.247918	0.183303	0.369638	0.279045	0.262262	0.207899	0.280784	0.0953429	0.244861	0.197153	0.309978	0.0454075	0.168844	0.17431	0.166682	0.178927	0.192982	0.12995	0.219454
ACACGAAT	0.475824	0.46717	0.309948	0.329394	-0.165956	0.0378285	0.34533	0.226122	-0.164975	-0.130627	0.234751	0.274129	-0.107007	0.102917	0.23368	0.247386	0.0513861	0.0825588	0.10279	0.31438	0.0937342	0.178998	-0.0197667	0.167916	0.335639	-0.0166378	0.311108	-0.0441447	0.0635691	0.0123668	-0.182681	-0.0650596	-0.104672	0.159833	0.157547	0.154446	-0.170115	0.0205529	-0.0675002	0.0520895	-0.150446	0.169066	-0.0529318	-0.0213256	-0.224949	-0.0505788	-0.057076	-0.0444155	-0.235458
CGACACAC	0.479291	0.475282	0.321998	0.142789	0.126058	-0.110568	0.346184	0.144002	0.175817	0.0173216	0.341233	0.0437	0.236815	0.185062	0.213316	0.189509	0.320448	0.0094446	0.133671	0.290152	0.271351	-0.173755	0.190788	-0.0286737	0.153491	0.0987477	-0.0374777	0.183106	0.187502	-0.116241	0.0964964	0.077996	0.167905	-0.0999839	0.204202	0.191504	0.185543	0.0351416	0.162404	0.215654	0.312879	0.100599	0.0189507	-0.0313193	0.160734	-0.105306	0.107709	-0.127246	0.0567017
TCGTGTCA	0.480103	0.476279	0.301801	0.216659	0.233549	0.0844145	0.275903	0.0689597	0.179211	-0.0616127	0.28079	0.160898	0.110908	0.0413711	0.253366	0.094584	0.270898	0.134202	0.197448	0.177658	0.187948	-0.0293827	0.0120807	-0.0406529	0.190868	-0.099012	0.115102	0.247495	0.239539	-0.0516838	0.102499	-0.181816	0.220009	-0.0574464	0.128226	-0.0667485	0.218815	0.207899	0.077653	0.0803757	0.123451	-0.0422661	0.0148135	-0.00537821	0.0727918	0.0832014	0.0634285	-0.124489	0.10456
GGACACGA	0.487378	0.485126	0.360534	0.30179	0.105489	-0.0085032	0.277359	0.230716	0.160722	0.0584429	0.272843	0.27161	0.163013	0.191959	0.251155	0.282607	0.339579	0.078952	0.144268	0.305465	0.209454	-0.0194427	0.143213	0.0194848	0.196125	0.079382	0.107313	0.0916461	0.142979	0.0390496	0.146013	0.097045	-0.0611306	0.0580172	0.018435	0.0649601	0.203374	0.111433	0.0885147	0.0461421	0.228745	0.11707	-0.00991546	0.00578908	-0.0278309	0.0328794	0.0021016	-0.0718901	0.0172159
GACACGAA	0.472328	0.483027	0.362964	0.248496	0.111632	-0.121681	0.28804	0.141304	0.0805391	-0.0885306	0.367766	0.235949	0.239485	0.0796409	0.330412	0.286402	0.292136	0.0512497	0.298699	0.378126	0.0529324	0.195386	0.124131	-0.02418	0.261274	-0.0289276	0.284191	0.136047	0.12983	-0.072596	0.0856996	-0.122257	0.0422611	-0.0736231	0.188757	0.110966	0.0866208	0.0153097	-0.0573311	-0.15544	0.105874	-0.202919	0.144481	-0.18962	0.0156077	-0.105601	0.188103	-0.105601	-0.0156901
GACACACC	0.46078	0.476427	0.0703933	0.17378	0.0215696	-0.0121061	0.120449	0.164402	0.00197733	-0.0241788	0.0610489	0.147373	0.14384	-0.208302	0.176181	0.093567	0.0400247	-0.0276859	0.0937695	-0.0236936	-0.0357868	-0.0506748	-0.0491856	0.0282786	-0.11296	-0.0129425	0.0749742	4.89174e-05	-0.036566	-0.0271715	-0.183863	-0.117198	-0.150446	-0.0582395	0.0139435	0.134797	0.00482254	0.067379	-0.0437662	0.169606	-0.000869328	0.0182253	0.0670723	-0.128651	-0.240012	-0.112901	-0.0301504	-0.0643355	-0.275945
GACACGCA	0.443903	0.486265	-0.0178374	0.262532	0.0131758	0.171129	-0.0163401	0.130535	-0.254668	-0.0913982	-0.104287	-0.0700482	-0.234008	-0.198716	-0.17122	0.0310517	0.00266795	0.0669169	-0.0367599	-0.0346742	-0.277211	0.0039161	-0.159007	-0.0652305	-0.152143	0.0172136	0.080246	-0.327165	-0.305552	-0.0836955	-0.352288	0.0614887	-0.254668	-0.00817662	-0.017025	0.0644677	-0.270774	-0.233255	-0.159688	-0.0557985	-0.062142	0.121792	-0.186967	-0.0946814	-0.299568	-0.119586	-0.308566	-0.0936723	-0.254363
CGTGTCGA	0.458962	0.484191	0.274649	0.250951	0.171484	0.0377188	0.140812	0.178032	0.0408108	0.0572443	0.141746	0.300616	0.158868	0.23985	0.175348	0.172872	0.23423	0.155264	0.0689229	0.199779	0.0892035	0.0579243	-0.0682716	-0.00459665	0.0369764	0.117173	0.0316229	0.0624592	-0.0356845	0.0252308	0.0618621	0.00616421	-0.190658	0.00481309	-0.029452	-0.113136	0.0240888	-0.15376	0.140511	-0.102	-0.00712146	-0.0799653	-0.0954204	-0.106803	-0.152288	0.0279084	-0.0638017	-0.0687116	0.0721341
AGACACGA	0.471566	0.483595	0.235001	0.268787	0.148596	-0.245967	0.232064	0.148965	0.137952	-0.0984435	0.213533	0.254679	0.0291198	-0.196257	0.27304	-0.0650051	0.178836	-0.0107884	0.142009	0.132332	-0.00403277	-0.00617986	0.0148632	-0.0849584	0.00471451	0.0995438	0.11506	0.140671	0.128602	-0.0812561	0.151698	-0.109528	-0.0636719	-0.0494332	0.0934498	-0.156543	0.0825464	-0.159517	0.012326	-0.0258177	0.160667	-0.141229	0.0991927	-0.0892319	-0.0305665	-0.0877515	0.0318395	-0.16216	-0.0337343
CGTGTCCA	0.476871	0.480312	0.164581	0.195876	-0.0578389	-0.0178604	0.208503	0.212944	-0.131336	0.0048176	0.0620008	0.0857497	-0.0923039	0.0482489	0.091863	0.0964964	0.321642	0.0221289	0.0437793	0.197283	-0.123136	-0.0770671	-0.0963124	-0.0134018	0.0144676	0.0112187	-0.0406622	-0.00465003	-0.0115742	-0.146597	-0.0430129	-0.000751894	-0.0612763	-0.0302541	-0.169465	0.0357417	-0.0113231	-0.0894367	-0.0265244	0.0814013	-0.0248644	-0.1007	-0.0473498	0.0548778	-0.131605	-0.047119	-0.116877	0.0881537	-0.145717
GACACGGA	0.476847	0.475546	0.254284	0.311741	0.234146	-0.0333899	0.19344	0.11152	0.194775	0.0459889	0.16044	0.176126	0.0378758	0.0766812	0.150354	0.191634	0.212827	0.0948896	0.013834	0.110797	0.109089	0.0616644	0.0660241	-0.105948	0.130849	0.135404	0.0270355	0.216603	0.101375	-0.107469	0.0282614	-0.0670267	0.105582	0.00686348	0.0128209	-0.167572	0.165193	-0.0434752	0.0793012	0.0792169	0.148587	-0.0153928	-0.0654738	-0.0893598	-0.00793925	-0.0178352	0.00970854	-0.0985832	0.149593
ATCGTGTC	0.471858	0.468695	0.103688	0.0366202	0.0552565	-0.192082	0.18316	0.102778	0.229107	-0.0606846	0.0709437	0.104918	0.142201	-0.0392917	0.196122	0.0351805	0.105165	-0.0294321	0.162061	0.0407973	0.0535426	-0.0300248	-0.0492989	-0.0950999	-0.0250483	-0.133348	0.039529	0.282558	0.140576	-0.0860622	0.064392	-0.000463424	0.164837	0.0400549	0.321099	0.190102	0.0872003	-0.0382767	0.175035	0.190814	0.20384	0.254377	0.164399	-0.0159618	-0.0342146	-0.143297	0.0497033	-0.146344	0.0086531
GCGTGTCA	0.466259	0.46716	0.173609	0.174472	0.0230697	0.0409322	0.39098	0.321043	0.0682384	-0.0806711	0.145469	0.097952	0.0216014	-0.0714308	0.119105	0.166116	0.170003	0.100106	0.103999	0.289197	0.0429544	-0.017039	-0.0180452	-0.0484078	-0.0125867	0.0806777	0.113805	0.0129205	0.0675252	-0.143297	-0.0492646	-0.108145	-0.0309072	-0.102595	0.190674	0.276593	0.102552	0.0686098	0.0908633	0.341141	0.236339	0.0354418	0.00608795	-0.0586037	-0.0618077	-0.115802	-0.0137767	-0.185699	-0.109745
CGTGTCAC	0.467277	0.473683	0.264494	0.0734204	0.120516	-0.208197	0.233366	0.119209	0.0218645	-0.0672813	0.244563	0.159028	0.0263242	-0.0119838	0.048588	-0.0263588	0.266242	0.127244	0.0626329	0.0576904	0.168974	0.039977	0.109127	-0.155909	0.180119	-0.13019	0.0243366	0.147346	0.0677992	-0.0977028	-0.0219951	-0.232975	-0.00576035	-0.263264	0.0603337	-0.169897	0.161748	0.17329	-0.158004	-0.00655374	-0.0230531	-0.237263	0.0865828	-0.131785	-0.100349	-0.183863	-0.0999805	-0.201011	-0.0542419
CGGACACG	0.464049	0.474621	0.216627	0.12332	0.148908	-0.0768773	0.252833	0.133027	0.0294785	-0.12204	0.318459	0.168439	0.089977	-0.172584	0.0782366	-0.104624	0.113717	0.0443849	0.118248	-0.0977654	0.0621379	-0.0032299	0.0827425	-0.24828	0.055277	-0.123359	-0.00924736	0.0876179	0.0861399	-0.0417572	-0.130803	-0.203012	-0.145842	-0.179588	-0.0538764	-0.234679	0.24113	0.0766318	-0.177728	-0.22426	0.0294937	-0.316494	0.0876358	-0.253462	-0.173049	-0.256067	0.0352029	-0.17122	-0.162342
GCGTGTCC	0.461131	0.473463	0.108322	0.092431	-0.0171726	-0.156067	0.120671	-0.122185	-0.259176	-0.0138088	0.0260149	-0.0544782	-0.2007	-0.062984	-0.00818013	-0.191009	0.228444	-0.159517	0.0570783	-0.0307338	-0.219179	-0.229158	-0.146471	-0.114448	-0.00688525	-0.204866	-0.261261	-0.137469	-0.150307	-0.17986	-0.210237	-0.2266	-0.261083	-0.280134	-0.0742413	-0.236051	0.039359	0.159631	-0.221396	-0.0969372	-0.161083	-0.198716	-0.00483711	-0.210237	-0.212668	-0.246725	-0.163451	-0.0645196	-0.244612
CCGTGTCC	0.461499	0.467804	0.143898	0.0779559	0.0392772	-0.101278	0.315522	0.142094	-0.0926751	-0.192082	0.230409	0.15317	-0.0297913	0.0651757	-0.0114428	-0.00238193	0.239112	0.125755	0.0804256	0.0696763	-0.044064	-0.053061	-0.0921398	-0.0562895	0.0501733	-0.0951294	0.0135843	0.0862572	0.117497	-0.0105019	-0.260906	-0.208672	-0.0223758	-0.0525647	-0.181816	-0.0644435	0.322491	0.37208	0.0278731	-0.019704	-0.0646511	-0.203292	-0.00250869	-0.0443687	-0.156703	-0.112552	-0.104191	-0.232606	-0.173755
AGGACACG	0.457475	0.465377	-0.031378	0.139809	-0.0631113	-0.0935583	0.060868	-0.0162931	-0.158503	-0.104287	-0.130016	0.0590821	-0.175696	-0.0373614	-0.173518	-0.067241	-0.0950735	-0.0698631	-0.0770805	0.0603431	-0.0939631	0.0712057	-0.292445	-0.00811742	-0.0801887	-0.00694544	-0.0140441	-0.20942	-0.24437	0.0467087	-0.266756	-0.137986	-0.164207	-0.164207	-0.025866	-0.109909	-0.229073	-0.112494	-0.112552	-0.069275	-0.0782579	0.118416	-0.122768	-0.211126	-0.352871	-0.207727	-0.235952	-0.0523564	-0.254212
CGACACGC	0.457035	0.463676	0.173229	0.333122	0.0380072	0.0306428	0.166761	0.183769	-0.102687	-0.105552	0.313357	0.269206	0.0567747	0.102538	0.0718459	0.242629	0.308819	0.213923	0.0192806	0.358338	-0.137882	0.0277037	-0.180967	0.0323196	0.199484	0.114366	0.267374	-0.0444976	-0.062354	-0.0675064	-0.0604838	-0.0942783	-0.0701688	0.000343037	-0.0271023	-0.0472923	-0.0585396	0.172668	-0.050788	0.0168912	0.034962	0.123605	-0.103858	0.00906854	-0.22652	-0.116178	-0.191364	-0.0899192	-0.120343
TCGACACA	0.469443	0.461123	0.251305	0.310489	-0.138934	-0.0478526	0.241944	0.129547	-0.131336	-0.0804358	0.223486	0.298355	0.184008	0.050884	0.11028	0.286499	0.319972	0.273893	0.227476	0.363828	-0.0133581	0.126162	-0.00320357	0.125793	0.289532	-0.0221594	0.298742	-0.0551819	0.248079	0.363243	0.000784674	0.00535644	0.169793	0.0863205	0.108452	0.0663853	0.0407409	0.0743176	-0.0319398	-0.00462422	0.0186968	-0.141229	-0.10942	0.010755	-0.0498005	0.130314	0.0672401	0.0676231	0.120835
GAACACAC	0.462659	0.462297	0.354163	0.3868	-0.0482286	0.0992242	0.236041	0.17259	-0.0504178	0.0440356	0.289392	0.341772	0.105695	0.103824	0.306594	0.266398	0.200173	-0.222403	0.185012	0.343665	-0.0773568	0.0668299	0.00858006	0.221988	0.236268	0.134635	0.278272	0.115367	-0.0626908	0.0128848	-0.101547	-0.166154	-0.136151	-0.0464484	0.107185	-0.195468	-0.0924544	-0.219246	-0.043922	0.148769	0.00202403	-0.136653	0.165971	-0.0610113	-0.109205	0.0431624	-0.0483147	-0.0389683	-0.107624
CCGACACA	0.461717	0.460586	0.373634	0.392203	0.00573991	0.127786	0.254564	0.322184	0.293968	0.123415	0.176076	0.216865	0.164989	0.167148	0.34506	0.30298	0.269475	0.255996	0.244353	0.328925	0.178111	0.283697	0.191995	0.230501	0.280908	0.218353	0.331526	0.301323	0.184312	0.224004	0.20404	0.176455	0.100394	0.272775	0.150407	0.114271	0.187354	0.185331	0.209569	0.105099	0.246286	0.175377	0.229095	0.311227	0.197506	0.222451	0.247545	0.118548	0.17259
ACACGAAA	0.46161	0.45745	0.205503	0.407051	-0.0477252	0.0833525	0.170174	0.0928423	0.0559791	-0.0469142	0.31187	0.389526	0.183884	0.23051	0.135447	0.235664	0.3472	0.0681217	0.102912	0.379362	0.096692	0.129781	-0.0347282	-0.0224184	0.251956	0.0268694	0.289131	0.193183	0.221673	0.331849	-0.0729787	-0.0906358	0.286869	0.217296	0.0464946	0.0763505	-0.0470742	0.0426327	0.0472175	0.0553113	0.0261213	0.0583081	-0.129585	0.167089	-0.100877	0.0696873	-0.0895649	0.130836	0.152092
CGAACACA	0.460909	0.459659	0.209198	0.385244	-0.160906	-0.0714497	0.085577	0.197526	-0.0511953	-0.0301995	0.243086	0.360322	0.372939	0.393272	0.218606	0.365326	0.192299	0.202532	0.140249	0.422737	0.00422982	0.126833	0.0148165	0.204157	0.184757	0.172893	0.291271	0.118316	-0.0145099	0.17813	-0.0500917	0.118628	-0.028625	0.214552	0.00653392	0.268005	0.00491447	-0.012514	0.118426	0.297644	0.0525441	0.232925	-0.00945944	0.0752898	-0.0776985	0.152153	-0.10348	0.120757	-0.0580287
CTGACACA	0.459172	0.455235	0.349508	0.30186	0.0468158	-0.0113093	0.262125	0.191258	0.12155	0.0984201	0.282784	0.397978	0.184265	0.216065	0.257858	0.325191	0.38395	0.32948	0.318388	0.394369	0.183487	0.217708	0.193434	0.146613	0.349487	0.11326	0.302487	0.318321	0.339472	0.380799	0.31455	0.173099	0.255906	0.206643	0.17081	0.0787531	0.135766	0.135309	0.189513	0.019066	0.19104	0.0753708	0.186286	0.137797	0.219632	0.162318	0.22766	0.108276	0.335469
TGAACACA	0.458529	0.453503	0.378455	0.394804	0.128531	0.0531351	0.181709	0.130132	0.170285	0.144475	0.39127	0.383774	0.264148	0.120669	0.346065	0.334177	0.35593	0.160349	0.326376	0.410614	0.163669	0.10484	0.13732	0.00458571	0.373816	0.144298	0.350617	0.338912	0.192775	-0.120551	0.118224	-0.245717	0.13042	0.0563816	0.213551	0.056077	0.158974	-0.115927	0.143532	0.0373151	0.229037	0.0604637	0.231661	0.0559452	0.155694	-0.0693292	0.192399	-0.0121037	0.152317
CGACACAA	0.450033	0.459387	0.385702	0.357776	0.0204689	-0.127984	0.351656	0.31564	0.181757	0.116165	0.30883	0.376987	0.108209	-0.11891	0.312915	0.319497	0.277517	0.121246	0.317567	0.383912	0.273862	0.256112	0.264061	0.20359	0.399072	0.0612745	0.415298	0.311639	0.226584	0.135397	0.116239	-0.154363	0.170638	0.0344358	0.149999	0.0186333	0.131807	0.0321483	0.203656	0.00709399	0.165239	-0.124949	0.0633979	-0.0407556	0.044664	-0.0229155	0.0863769	0.0937423	0.227688
ACACACAT	0.453429	0.455995	0.308033	0.124362	0.174355	0.0460246	0.249719	0.151713	0.19534	0.115597	0.327415	0.264561	0.259351	0.135734	0.349122	0.346322	0.311575	0.144564	0.26823	0.384512	0.295704	0.138085	0.190299	0.119937	0.248052	-0.0526494	0.172899	0.306979	0.258005	-0.0566835	0.159193	0.00758213	0.21478	0.103396	0.332142	0.222089	0.261506	0.260689	0.208325	0.173722	0.288381	0.177441	0.120405	0.0289372	0.140806	-0.020371	0.116061	-0.0629611	-0.00462543
TGTGTCAA	0.446457	0.457123	0.115173	0.211071	-0.215614	-0.20048	0.0824675	0.244643	-0.138405	-0.0863298	0.111999	0.168728	0.191881	0.139215	0.167972	0.161647	0.20005	0.169474	0.17873	0.348759	-0.0457084	-0.0125881	-0.0730123	-0.0657216	0.0469296	-0.0069458	0.0974829	0.0354256	-0.14698	0.0435767	-0.217328	-0.120761	-0.128988	-0.0986855	0.011089	0.0484149	-0.0678319	0.173629	-0.0229812	0.0948896	-0.119997	0.104237	-0.201502	-0.0237917	-0.230364	-0.0431349	-0.173518	-0.0424584	-0.273518
CTGTGTCA	0.449473	0.457779	0.301998	0.247771	-0.232148	0.0501547	0.0245797	0.210569	-0.142481	-0.0392588	-0.00691874	-0.0466157	-0.133913	0.0589775	-0.00762908	0.0470675	0.225966	0.0637412	0.107791	0.0306001	0.0803682	0.0928697	0.158868	-0.074425	0.165855	-0.0394723	0.157551	-0.0548994	-0.0474693	0.0264103	-0.0441615	5.52072e-05	0.0559692	0.0236747	-0.0852203	0.0325033	-0.183863	-0.0301614	0.0359878	-0.0348032	-0.116052	-0.148413	-0.129843	-0.0243488	-0.154821	-0.112668	-0.123732	-0.0616914	-0.0728705
AACCGTGT	0.446734	0.46394	0.0340511	0.326706	0.0515339	0.145094	-0.0874324	0.14873	-0.0922429	0.0491562	0.061341	0.117651	-0.1098	-0.0329368	-0.106298	0.206028	0.0443487	0.052342	-0.164782	0.0995206	-0.149485	-0.0496292	-0.0761074	-0.0403906	-0.00695094	0.0613186	0.084711	-0.122621	-0.0745399	-0.119928	-0.0794779	0.0262013	-0.151713	-0.0525121	-0.0859989	-0.0360354	-0.066363	-0.187615	-0.0979825	0.104904	0.0102122	0.143343	-0.143533	-0.0448516	-0.210679	-0.092088	-0.0605657	0.00634895	-0.125104
CGACACGA	0.450756	0.456624	0.0385419	0.260133	0.0502209	-0.0410959	-0.0194717	0.0363647	0.00581773	0.0554938	-0.0337587	0.0470318	0.088524	0.0919902	-0.08348	0.0678061	0.0221294	-0.0185725	-0.239794	0.0889962	-0.0983937	-0.162893	-0.198297	-0.130103	0.0120434	-0.058485	-0.113371	-0.0767164	-0.163827	-0.129328	-0.0999241	-0.187615	-0.16968	-0.0909516	-0.120971	-0.105159	-0.155284	-0.130715	-0.145842	-0.0280961	-0.0788583	-0.0476116	-0.167778	-0.129073	-0.179317	-0.214813	-0.200174	-0.0628526	-0.263078
CCGACACG	0.456443	0.457573	0.12086	0.24364	-0.0750225	-0.0578057	0.198379	0.134042	-0.163827	-0.028059	0.164297	0.180745	0.0143541	0.105503	0.0251062	0.159326	0.332163	0.22751	0.1701	0.314536	-0.205651	0.127625	-0.162525	-0.0375895	0.0905485	0.0633411	0.185106	-0.0704752	-0.227084	0.0608795	-0.256864	0.0183658	-0.0991545	-0.0778886	0.0270826	0.0269421	-0.0420095	0.0466846	-0.154516	0.15433	-0.117522	-0.139903	-0.203105	-0.0181632	-0.367572	-0.154061	-0.15784	0.0406074	-0.0690019
CCGGACAC	0.460713	0.455976	0.191697	0.203207	0.0847831	0.0871561	0.209219	0.103254	-0.13851	-0.0473834	0.258717	0.155182	0.0874635	0.159965	0.0702093	0.130366	0.196716	0.132563	0.0128227	0.123087	0.171473	-0.0670954	-0.0290235	0.100211	0.0444398	0.103733	0.156376	-0.0384068	0.0387674	0.0124591	0.00852506	-0.0589059	-0.0375228	-0.115243	0.163862	0.138307	0.0263776	-0.0285352	0.101883	0.228655	0.00135795	0.0452905	-0.0643036	0.0510961	0.00965836	0.0151917	-0.0350461	-0.122988	-0.0515336
GACACGAC	0.460275	0.455019	0.196348	-0.0542954	0.180693	0.109534	0.253127	0.00830104	0.281129	0.076299	0.112449	-0.0583556	0.210723	0.0204716	0.218615	-0.0217224	0.177519	-0.182102	0.0809522	-0.0290952	0.16655	-0.270333	0.141093	-0.240894	0.057325	-0.210347	-0.261261	0.311864	0.240366	-0.227084	0.297318	-0.111862	0.258236	-0.122475	0.37089	0.285634	0.24421	0.00674826	0.286221	0.147313	0.278891	0.240507	0.202374	-0.0368143	0.241176	-0.212901	0.215768	-0.26968	0.221078
CGTGTCAA	0.463539	0.446305	0.227058	0.207141	-0.0612582	0.0876183	0.316538	0.309561	-0.0189376	0.0374645	0.0935743	0.1907	-0.110073	0.0844411	-0.0123685	0.164988	0.294166	0.221523	0.0684279	0.204956	0.179029	0.203648	0.145932	0.134377	0.215014	0.286606	0.238592	0.0715536	0.0353453	0.173821	0.0572708	0.0694288	0.09132	0.117895	0.00404536	0.0881266	-0.0267168	0.0872465	-0.00498709	0.229461	-0.0181186	-0.0130636	-0.113312	0.174916	0.000187514	0.0693807	-0.00764674	0.0270256	0.0765628
ACACGGAT	0.456867	0.439125	0.266551	0.288989	0.140966	0.0280113	0.245986	0.29067	0.0695151	0.237364	0.111483	0.178669	-0.0257386	0.0819723	0.0717795	0.225023	0.236615	0.196134	0.043882	0.112202	0.203954	0.295206	0.116249	0.109077	0.262926	0.269151	0.316164	0.0556028	0.0651103	0.101464	0.157071	0.0780047	0.127947	0.201762	0.132767	-0.0190563	-0.0026832	0.0474118	0.136059	0.208332	0.0717826	0.101581	-0.0988408	0.122263	0.15718	0.0835152	0.0456997	0.0127235	0.179632
AATCGTGT	0.456052	0.432486	0.347987	0.356024	-0.00786325	0.0354786	0.335425	0.300453	0.215291	0.222313	0.209757	0.258944	0.218111	0.0280984	0.294373	0.227217	0.287198	0.186543	0.372945	0.37907	0.309706	0.207158	0.156486	0.19333	0.377302	0.115673	0.306997	0.27076	0.235661	0.213146	0.0124946	-0.0378147	0.190376	0.148988	0.109552	0.133368	0.14468	-0.025097	0.225301	0.198435	0.15974	0.0962227	0.0943285	0.179675	0.250845	0.223654	0.161065	0.0584153	0.188962
ACACAGAT	0.453131	0.404874	0.263358	0.344884	-0.11343	-0.168825	0.263812	0.241709	-0.0768997	0.021975	0.0561207	0.198712	0.00975235	0.159574	0.189389	0.193437	0.226689	0.231879	0.174744	0.413173	0.202643	0.174161	0.119419	0.118137	0.352336	0.119949	0.299087	0.113909	0.0581454	-0.00360876	0.0307461	0.00890756	0.0691058	0.0155025	0.0357562	-0.0070048	0.0131873	0.0125799	0.137018	0.0762338	-0.0601498	0.0300074	-0.0671663	0.0818679	-0.0311942	0.0296412	-0.0805169	-0.0152205	-0.0129669
AACTGTGT	0.450127	0.39496	-0.0140984	-0.131515	-0.100436	-0.129414	0.135423	0.0748935	-0.136251	0.00251768	-0.081044	-0.113253	-0.0917161	-0.0222466	-0.101412	-0.128067	0.0180566	-0.0726978	-0.0633762	0.00948528	-0.141454	-0.154212	-0.223882	-0.108725	-0.0284854	-0.162709	-0.149757	-0.137779	-0.12652	0.0518051	-0.000243495	0.11189	-0.0893153	-0.0982679	-0.00334997	-0.0529063	-0.0752289	-0.101368	-0.116941	0.00925863	-0.243297	-0.00179419	0.160257	0.0644386	0.183494	0.0351953	0.283427	0.0408104	0.349061
CCGTGGTC	0.456896	0.383971	0.274005	0.141799	-0.0148115	-0.0978298	0.25971	-0.0137709	-0.144129	-0.150169	0.144016	-0.0121149	0.0610928	0.128532	0.275894	0.134021	0.261085	0.156466	0.332785	0.264833	0.0942968	0.00894642	0.0448865	-0.0454922	0.327122	0.0509479	0.191363	0.195008	0.0617105	0.0669691	-0.144977	-0.104001	0.195806	0.0575232	0.0287905	-0.020079	-0.0828279	0.243943	0.0144449	0.00151476	-0.0247427	0.0311835	0.022324	-0.165365	-0.125026	0.00140768	0.054538	-0.0636364	-0.0169218
AAAGTGTG	0.452906	0.412459	0.313006	0.28782	0.115071	0.176097	0.364368	0.25494	0.0396583	0.0756933	0.306179	0.26058	0.209339	0.0888048	0.329418	0.233381	0.149225	0.0171793	0.283797	0.294702	0.219606	0.121798	0.119118	0.208983	0.384455	0.156124	0.35975	0.253182	0.238385	0.230188	-0.137675	-0.132975	-0.0883084	0.10641	0.0377634	-0.0666192	0.136512	0.033006	0.0836879	0.0696367	0.0386393	-0.124872	0.241346	-0.0654381	0.0865653	0.091292	0.066773	-0.044934	-0.127327
ACACACTC	0.453362	0.415079	0.330842	0.268869	0.0468099	-0.0747545	0.253278	0.190016	-0.0132778	-0.0682219	0.299406	0.369956	0.364439	0.26668	0.29093	0.299443	0.325434	0.201092	0.289742	0.341082	0.227615	-0.0278628	0.0763699	0.107346	0.413803	0.106055	0.297128	0.158155	0.324792	0.300011	-0.0723773	-0.14168	0.281216	0.205252	0.0558637	-0.0282437	0.0504098	0.0536105	-0.0781772	0.104812	-0.0821334	-0.15867	0.0854251	0.0890015	0.192135	0.25583	-0.0448377	0.163077	0.0609702
AGAACACA	0.457213	0.435597	0.27882	0.330784	-0.0239927	-0.135262	0.265509	0.175695	-0.0810771	0.0285064	0.33387	0.334067	0.157269	0.177347	0.176856	0.268798	0.189362	0.183283	0.170884	0.292085	0.22981	0.14238	0.11866	0.0796477	0.328789	-0.0106026	0.258365	0.128262	0.0514881	-0.0106067	-0.101189	-0.115927	-0.0488546	0.145069	0.0658193	0.200641	-0.117783	-0.0232799	-0.00702149	0.121122	0.0877944	0.0573393	-0.0396306	0.0895766	-0.0347758	-0.00367875	0.0991515	-0.137986	-0.11152
ACGACACA	0.451536	0.441469	0.315551	0.273492	0.0679068	0.0630536	0.130098	0.213037	0.265468	0.089593	0.259418	0.138394	0.174861	0.105774	0.246818	0.0441738	0.116953	0.173792	0.154634	0.0460445	0.0628714	0.105771	0.145174	0.103801	0.206825	0.0393183	0.125706	0.264871	0.132489	0.176316	0.126787	0.200042	0.193346	0.211141	0.116931	0.000664315	0.176293	-0.103574	0.144777	0.0204996	0.201784	-0.0140724	0.117339	0.0627754	0.127271	0.0374841	0.286719	0.0485145	0.0904417
AACACGAA	0.45137	0.448855	0.150957	0.213259	0.0915502	0.126293	0.0461302	0.161118	-0.15376	-0.0329391	0.00700563	0.276985	-0.0868673	0.145558	-0.0956976	0.210007	0.103739	0.306749	-0.0743718	0.18972	-0.0683128	0.141529	0.00180061	0.152888	-0.15544	0.0655187	0.207315	-0.134775	-0.0998041	0.0159153	-0.219518	0.0917117	-0.241005	0.0974397	-0.222695	-0.0166755	-0.127819	-0.13279	-0.114327	0.15241	-0.084146	0.019383	-0.158336	0.170506	-0.175203	0.057589	-0.0824558	0.0443797	-0.298716
AGACACGG	0.44521	0.453938	0.0434208	0.0890546	0.0545601	-0.1383	0.22937	0.00217019	0.0972446	-0.09444	0.204644	0.194636	0.0541768	-0.136957	0.0173907	-0.0535707	0.12128	-0.132514	0.0763918	-0.0892014	0.0408659	-0.076262	-0.0959595	-0.137675	0.0678626	-0.167985	0.00709709	0.0342505	-0.00589708	-0.113727	-0.0677808	-0.0257384	-0.143063	-0.145967	-0.0470567	-0.142481	0.0564683	-0.064775	-0.0546471	-0.0722258	0.130427	0.103937	-0.0748296	-0.229243	-0.188273	-0.172125	-0.0780591	-0.16968	-0.0725759
AGCGTGTC	0.444347	0.460478	0.176315	0.146508	0.101398	0.0962082	0.229309	0.299041	0.0569384	-0.00622284	0.130147	0.289246	-0.0176601	0.139237	0.0957652	0.248138	0.161744	0.252752	-0.00861147	0.176585	0.00537424	0.126967	0.0444025	-0.00626587	-0.027216	0.090214	0.168525	0.0736439	-0.0275882	-0.0504307	-0.101144	0.0318407	-0.0955468	0.0920997	-0.0309745	0.0809859	0.0691366	-0.160206	-0.127572	0.0564802	-0.0329075	0.00413031	-0.0522562	0.0624003	0.00582814	0.0125318	0.0240199	0.0122746	0.00735585
AAGACACG	0.441854	0.464575	-0.157187	0.123582	0.104586	0.106416	-0.03745	-0.0731808	-0.0521673	-0.23536	-0.107212	-0.291364	-0.142597	-0.111919	-0.200922	-0.162709	-0.0556792	-0.15391	-0.030252	-0.188606	-0.11343	0.0102494	-0.245717	-0.248017	-0.0909157	-0.0587945	-0.0674624	-0.132606	-0.20048	-0.0943743	-0.324109	-0.239577	-0.0269379	-0.15817	-0.160206	-0.132975	-0.0624814	-0.086774	-0.0570799	-0.188941	-0.035043	-0.0430616	-0.205453	-0.136856	-0.212843	-0.231069	-0.306148	-0.206399	-0.35986
CCGTGTCG	0.430807	0.465894	-0.0391794	0.0324292	-0.232148	-0.186646	0.25863	0.236523	-0.370115	-0.12321	0.00296272	0.0685209	-0.168613	-0.127737	-0.129671	-0.0329477	0.178775	0.043931	-0.143063	0.261333	-0.203152	-0.0422474	-0.0355526	-0.0931714	0.0920148	-0.0655323	0.0756163	-0.310292	-0.255596	0.00359114	-0.126043	-0.005554	-0.203012	-0.080103	-0.320761	-0.20752	-0.309583	-0.0448491	-0.292812	-0.0048342	-0.369465	0.0639621	-0.250724	-0.127984	-0.140671	-0.159346	-0.233913	-0.111238	-0.336653
GGCACGAA	0.432991	0.458462	0.172684	0.137713	0.0538293	-0.332148	0.116939	-0.0752596	0.144671	0.00458434	0.176528	0.0544153	0.296256	0.192313	0.135713	-0.0146456	0.1197	0.0290017	-0.018689	0.0173632	0.102434	-0.235655	-0.0569026	0.0113951	0.0218469	-0.0061692	-0.103012	0.118455	0.0499315	0.0392681	0.0598133	-0.0664285	-0.0385204	-0.111976	0.114195	0.0513966	0.0539396	-0.0695982	0.11374	0.0768719	0.0871519	0.0709675	-0.0464068	-0.137572	-0.137161	-0.133536	0.0185879	-0.014398	-0.00342077
CGTGTCAG	0.431316	0.457334	0.0506474	0.15485	-0.027791	-0.101728	0.325458	0.251756	0.0145273	-0.106098	0.251216	0.118039	-0.00767581	0.175592	0.0919284	0.196617	0.232539	-0.0176787	0.0950071	0.276389	0.190901	0.0098328	0.0512057	-0.000388296	0.019561	0.0640354	0.128068	0.0944006	0.0971847	0.15867	-0.109098	0.113908	0.134126	0.126817	0.109766	0.185564	0.147294	0.0358954	0.0575012	0.109215	0.153606	0.179129	-0.0523054	0.0341638	-0.0330406	0.0158785	-0.130103	0.0723095	-0.0647567
ATGACACG	0.433909	0.463143	-0.0202186	0.235704	-0.0727119	-0.173049	-0.0295019	0.00990947	-0.221325	-0.0432046	0.0296302	0.225175	0.0938225	0.251515	-0.123062	0.149321	-0.0193817	0.0163163	-0.237161	0.0519039	-0.18729	0.0322127	-0.208991	0.0446864	-0.168194	0.142994	0.0990412	-0.246092	-0.211691	-0.0703772	-0.217134	-0.141567	-0.259007	-0.112378	-0.0595854	0.0145381	-0.199568	-0.139362	-0.148149	0.00955501	-0.216115	-0.152288	-0.257349	-0.0312016	-0.287615	0.00469639	-0.161798	-0.075579	-0.339254
CAGACACG	0.443017	0.46425	0.235544	0.190885	-0.0434277	-0.00557503	0.201881	0.0873455	0.0914868	0.0211421	0.123566	0.28423	0.0904472	0.0157948	0.0342863	0.0658233	0.220721	0.134726	0.0585889	0.017527	0.0642006	0.0953341	0.0193679	-0.0982578	-0.0662549	0.153519	0.0721421	-0.000259221	0.00125057	0.0302776	-0.0079501	0.0237617	-0.0785318	-0.0208584	-0.0754969	-0.0228742	-0.00448931	-0.296257	0.0356403	0.0375237	0.105989	0.0303313	-0.105404	0.0985395	-0.102457	-0.0741696	-0.0588923	-0.0492738	-0.0345811
CGTGTCTA	0.445283	0.464697	-0.0667594	0.158981	-0.0438604	-0.0477992	0.0592768	0.11994	-0.124949	-0.037493	-0.0375957	0.156636	-0.158004	-0.116241	-0.24698	-0.0198822	-0.0462433	0.0447211	-0.0627526	0.0961286	-0.090743	-0.0566806	-0.312263	-0.0606894	-0.0551688	-0.0138258	0.0497418	-0.181248	-0.151428	0.0414993	-0.270774	-0.165956	-0.0584462	-0.0388307	-0.0805358	-0.11209	-0.132422	0.0536647	-0.100656	0.0544331	-0.14908	0.0297701	-0.15986	-0.0328792	-0.309313	-0.177469	-0.249757	-0.146597	-0.312378
GACACGGC	0.442538	0.468254	0.00913862	0.208173	-0.0950728	0.0536099	-0.0110317	0.124114	-0.124565	-0.156384	-0.183268	0.0668607	0.0667803	0.103922	-0.0586895	0.0612774	0.0530848	0.113515	0.0145731	-0.0560454	-0.0441006	0.0469275	-0.163639	-0.0781252	-0.0940838	-0.0460356	0.117132	-0.137059	-0.223882	0.0868735	-0.220831	-0.123062	-0.265561	-0.0800442	-0.0448876	-0.0092565	-0.164397	0.175693	-0.00792116	0.0984187	-0.106753	-0.107883	-0.113727	-0.0843842	-0.197881	-0.039269	-0.261618	-0.0308816	-0.247625
ACCGTGTC	0.438034	0.469988	0.0215618	0.145921	-0.0449427	-0.00437417	0.185733	0.151208	-0.0670799	-0.0362755	0.00733579	0.111847	-0.104964	-0.095606	-0.155284	0.0036307	-0.105453	0.0918736	-0.0902059	0.0149386	-0.0391931	0.133666	-0.140894	-0.233068	-0.0839228	0.115153	0.0554677	0.00322588	-0.0182336	0.0148033	-0.226922	-0.206349	-0.20278	-0.0714641	-0.0647117	-0.0290292	-0.0121073	-0.191009	-0.0699646	-0.162709	-0.127003	0.0169224	-0.106148	0.0108235	-0.133255	-0.232422	-0.145842	-0.158503	-0.101773
CGCGTGTC	0.437131	0.472159	0.0833814	0.181195	-0.0178263	0.165858	0.182638	0.232835	0.0724225	0.0242486	0.00211591	0.0473043	0.192288	0.0863379	0.144544	0.0952595	0.109045	-0.0585896	0.0729261	0.115109	0.128399	-0.16517	-0.0978885	-0.060725	0.0489164	-0.0284108	-0.0669816	0.0380145	0.0471603	0.126435	-0.0137931	-0.0936509	-0.0290673	0.0628492	0.0387838	0.222088	0.0923155	0.0809219	0.158472	0.27552	0.0560068	0.106015	-0.0285768	-0.123136	-0.133913	0.0208214	-0.0343971	0.0927215	0.00193793
CCGTGTCA	0.434543	0.471414	0.203458	0.292809	-0.197062	-0.0949477	0.239486	0.25271	-0.0777598	0.123862	0.18439	0.237278	0.131269	0.157076	0.146986	0.341061	0.240277	0.129606	0.0942582	0.410357	0.0242934	0.0756137	0.124134	0.223461	0.34085	0.100378	0.350501	0.16866	0.0630865	0.196428	0.389713	0.35917	0.0764415	0.164594	0.216091	0.217262	-0.110182	-0.00242333	-0.170333	0.00432495	-0.0683468	-0.138195	0.30355	0.181477	0.235912	0.353104	0.181442	0.418191	0.413365
GACCACAC	0.453496	0.475343	0.15454	0.327156	-0.327409	0.0292607	0.278806	0.124023	-0.316115	-0.142366	0.0944181	0.344836	-0.211126	0.0314152	-0.0290869	0.279519	0.209422	0.237902	0.0994176	0.395764	0.0267747	0.112715	-0.0886668	-0.00456031	0.195286	-0.0754107	0.197758	-0.13098	-0.0790997	-0.113253	-0.29431	-0.125885	-0.219723	-0.12636	-0.127327	-0.0502809	-0.0564683	0.160865	0.0695337	0.00752111	-0.227737	-0.131426	-0.186328	-0.0964758	-0.18729	-0.125571	-0.354668	-0.0505791	-0.0760753
CGTGTGTC	0.447584	0.470811	0.318331	0.291559	-0.0833546	-0.105502	0.246725	0.249056	0.0745897	0.114255	0.318692	0.426628	0.256959	0.158988	0.327263	0.398684	0.283458	0.333708	0.325154	0.418458	0.127293	0.105268	0.172245	0.0935554	0.227326	0.259958	0.292309	0.142088	0.0945891	0.0971235	-0.112843	-0.0674503	0.0505698	0.109805	0.259106	0.325624	0.0680612	0.217641	-0.00829616	0.212057	0.135793	0.226715	0.0320417	0.164065	0.0531399	-0.0400898	0.045387	0.0386123	-0.037361
ATGACACA	0.438658	0.462907	0.161951	0.30367	0.191714	0.161038	0.0584731	-6.53671e-05	-0.167366	0.0733747	0.123491	0.356313	0.0381235	0.160875	0.15784	0.297469	0.277615	0.288837	0.262317	0.441836	-0.185387	0.0648686	-0.131247	0.0422515	0.18522	0.130529	0.258745	-0.0995391	-0.0661263	-0.146218	-0.128067	-0.154821	-0.0971701	-0.139794	0.0811114	0.0261807	-0.197469	-0.197881	-0.106905	-0.183863	-0.131966	-0.127327	-0.0635284	-0.0216775	-0.0711968	-0.0578952	-0.0853178	-0.202549	-0.0956386
GAGACACA	0.43336	0.449521	0.277993	0.328655	-0.0398373	0.0484172	0.166934	0.0368007	-0.0494343	0.0789723	0.256109	0.303943	0.205446	0.232333	0.136939	0.305574	0.34685	0.199066	0.31111	0.456387	0.0136804	0.0175919	0.00635762	0.0662342	0.242969	-0.00640974	0.24919	0.0906871	0.0321051	-0.0818082	-0.109474	-0.152143	-0.00429058	-0.17167	-0.0164986	-0.0169947	-0.0704272	-0.197881	-0.0719649	-0.135853	-0.0221949	-0.186967	-0.0623516	-0.0568056	-0.0792086	-0.0975112	-0.020688	-0.0590241	0.0414554
AGACACAG	0.430779	0.456541	0.228354	0.156578	0.00373201	-0.116368	0.356394	0.208201	-0.132148	-0.0945762	0.268668	0.316335	-0.0449629	-0.0248098	0.216285	0.235471	0.320256	0.108978	0.241001	0.418108	-0.110735	-0.174473	-0.0149454	0.0559485	0.346337	0.0128022	0.389538	0.138512	0.0141202	0.0355977	-0.165758	-0.338828	-0.104001	-0.211182	-0.0931625	-0.29431	0.147005	0.165399	-0.168613	0.13976	-0.172354	-0.247108	0.00580196	-0.173283	-0.0239681	-0.227654	-0.0169122	-0.320343	-0.246597
GGGCACAC	0.430343	0.457011	0.327379	0.241781	0.136061	0.143579	0.216546	0.193017	0.240158	-0.0230507	0.326348	0.337011	0.227118	0.182187	0.322807	0.343782	0.31055	0.247338	0.250643	0.388498	0.18689	0.144441	0.25054	0.176143	0.128007	0.0566697	0.207968	0.232483	0.213694	-0.0155204	0.109042	0.00431814	0.19864	0.091215	0.367479	0.385365	0.230946	0.0838328	0.195528	0.303338	0.241451	0.234379	0.192761	0.0956497	0.218389	-0.0731314	0.149449	0.0265332	0.0794661
ATGTGTCA	0.422393	0.455015	0.176706	0.148096	0.110233	0.0725867	0.135421	0.0704159	0.18609	-0.113371	0.17307	0.134654	0.00523611	0.0126101	0.10921	0.0172531	0.0743622	-0.0558437	0.0531592	0.0305619	-0.0301445	0.0651359	-0.0894459	-0.00455529	-0.0122422	-0.0721315	-0.0473011	0.141421	0.283185	0.26896	0.0184169	-0.055745	0.186348	0.186574	0.0212678	0.0686074	0.0977051	-0.127984	0.163873	-0.140561	0.218461	-0.0825952	0.106227	-0.0558107	0.0491635	-0.0910759	0.199731	-0.125885	0.171004
CGAACACG	0.412441	0.456492	0.228911	0.244339	-0.0191142	0.0145555	0.164262	0.272475	0.0333309	0.115677	0.106204	0.104053	-0.0349923	-0.0838096	0.237921	0.199473	0.259161	0.321054	0.175217	0.283011	0.0113984	0.0269856	0.122744	0.269054	0.156044	0.156644	0.235438	0.0535094	0.169838	0.113996	0.104533	0.0950779	0.0281907	0.111192	0.0550068	0.116954	0.10502	0.0756599	-0.0705408	0.0564453	0.0705595	0.171977	0.156029	0.186344	0.197108	0.170912	0.0150398	0.123656	0.0197902
CACGAAAA	0.425648	0.4714	0.120931	0.0750527	-0.0313811	-0.0663612	0.11548	0.205159	-0.040918	-0.0191445	0.125964	0.267036	-0.00993675	-0.0789475	0.0173134	0.215323	0.00232183	0.227843	-0.0575484	0.201816	-0.0177493	0.0543068	-0.0978654	-0.00877631	-0.0480771	0.107633	0.150506	0.0735568	0.00784064	-0.0395809	-0.184771	-0.177989	-0.0757968	0.029496	-0.138828	0.0503639	0.0171609	0.0267793	-0.0770776	0.17037	0.0181527	-0.0720367	-0.14908	0.116969	-0.159346	-0.124718	-0.16925	-0.157512	-0.189963
AACGTGTC	0.419751	0.472089	0.0785907	0.256793	0.169773	0.0319907	-0.00907018	0.128989	-0.0519138	0.0453035	-0.104672	0.14643	-0.119518	0.0153113	-0.114935	0.106005	0.0220325	0.030104	0.0745125	0.062492	-0.182391	0.0361646	-0.203105	0.0463448	-0.113194	0.110289	0.113915	-0.116622	0.143447	0.31576	-0.180967	0.0976335	-0.0995489	0.116224	-0.243771	0.0838015	-0.167572	-0.0451049	-0.057199	0.0296802	-0.0272289	-0.113608	-0.231966	0.0691724	-0.271444	-0.0038493	-0.0633146	-0.0851944	-0.0550802
CCGTGTTC	0.405881	0.471443	-0.127003	0.0972702	-0.183565	0.0696386	0.335243	0.25317	-0.118442	-0.166555	-0.0785967	0.124715	-0.258838	-0.00277999	-0.104479	0.0758839	0.086923	0.182183	-0.150864	0.18473	0.00668062	0.0628495	-0.315552	-0.266154	-0.179048	-0.0938385	-0.0150057	-0.233068	-0.157349	-0.16517	-0.0741576	-0.0705324	-0.146597	-0.194692	0.234373	0.220308	-0.0740891	-0.0598174	-0.0304114	0.059414	-0.0913313	-0.0490159	-0.249621	-0.18729	-0.238195	-0.147237	-0.305404	-0.114026	-0.229158
CGTGACAC	0.396803	0.467016	0.173614	0.109766	0.240486	0.157689	0.0633623	0.0220207	0.0841544	0.0145526	0.233546	0.0450569	0.184963	0.0539131	0.142396	0.0306567	0.181654	0.0400137	0.143488	0.248905	0.0435215	-0.166154	0.00927603	-0.0884589	-0.0199731	-0.072071	-0.0407784	0.11051	0.106465	-0.179048	0.0240888	-0.0375586	0.0918618	-0.154516	0.0529041	-0.0447677	0.0808756	-0.0439833	0.0611672	-0.0521457	0.0966904	0.00677435	-0.0165923	-0.0876992	-0.0371074	-0.0963279	0.121134	-0.0319206	-0.0167812
CTCGTGTC	0.393596	0.455492	0.084568	0.206201	0.0101244	-0.152433	0.194863	0.210743	-0.135655	-0.00623537	0.153836	0.200121	0.0764111	0.00246831	0.133347	0.0994392	0.246898	0.108075	0.216364	0.0999201	-0.0577655	0.168034	-0.0728035	-0.0156887	0.0729421	0.0772464	0.19812	0.038391	-0.0201955	0.029175	-0.132422	-0.224872	-0.017416	0.0125553	0.0578195	-0.0192916	0.125987	0.221561	-0.178516	0.0741374	-0.044418	-0.133255	-0.0636821	-0.0730436	-0.188941	-0.023111	-0.104479	-0.104576	-0.208092
ACGGACAC	0.345907	0.450625	-0.12426	0.112372	-0.0651892	-0.207109	0.291296	0.293491	-0.197881	-0.0936652	0.0782208	0.127407	-0.187615	0.105241	-0.136051	0.0243895	-0.0324434	0.0791122	-0.220204	0.137219	-0.168825	-0.112901	-0.133348	-0.0952787	-0.196658	0.0875423	0.0971307	-0.225414	-0.164782	-0.0819269	-0.291721	-0.291009	-0.198716	-0.1451	-0.0423093	0.18638	-0.0545326	0.0915825	-0.109259	0.042898	-0.144249	0.0325554	-0.313906	-0.0559426	-0.0542251	-0.270115	-0.196658	-0.227572	-0.244855
GACACGTC	0.364313	0.45078	0.255673	0.224382	-0.0042398	0.0377141	0.260816	0.326222	-0.032618	0.0220728	0.088845	0.0597646	0.0378519	0.0251627	0.140641	0.169747	0.00144084	0.226303	0.0772081	0.0831152	0.0876896	-0.0117559	0.0640581	0.191604	0.0611562	-0.00224771	0.232297	-0.00523526	0.0443874	0.124486	0.18196	0.0549053	0.180595	0.0799562	0.0743733	0.0613688	0.0128875	-0.0785132	0.168801	0.117724	0.156916	0.265915	0.0811955	0.206071	0.146186	0.0715855	-0.0016394	0.0576262	0.177259
CACGAATC	0.397115	0.454327	0.092841	0.119332	-0.191364	-0.128067	0.143097	-0.0106069	0.0770034	-0.0846511	0.114762	0.264572	-0.0105129	-0.0116063	-0.07991	0.109118	0.233399	0.0494864	0.0912863	0.263946	0.31083	0.172427	-0.0930917	-0.120273	0.278901	0.118311	0.202808	0.131093	0.0184894	-0.122475	0.0858295	-0.122841	0.107492	-0.132057	-0.018901	-0.224949	0.0184076	-0.069872	-0.0101377	-0.018478	0.0590637	-0.232975	-0.207263	-0.0645475	-0.148149	-0.144733	-0.00179777	-0.115243	0.0664431
CTAGACAC	0.413722	0.454571	0.252886	0.364064	0.0166558	0.152309	0.0656259	0.204277	0.0866897	0.15775	0.181974	0.248598	0.113444	0.229909	0.125396	0.166612	0.0611244	0.223479	0.074877	0.223368	0.0961094	0.0587252	0.0382304	0.232667	0.115331	0.125867	0.255565	0.18292	0.319001	0.341882	0.0197099	0.188745	0.206195	0.272372	0.012652	0.0590436	0.0859125	0.0824634	0.084196	0.213243	0.0671751	-0.003982	0.0870437	0.207491	0.141564	0.223478	0.211695	0.184609	0.14223
GAACACGA	0.43382	0.452764	0.164998	0.176827	0.0174344	0.0574303	0.193811	0.106729	-0.0909379	-0.0565557	0.076054	0.186604	0.105782	0.207329	-0.0188708	0.150868	0.10708	0.164513	-0.0169972	0.0204873	-0.0486659	0.0267415	-0.0107499	0.0817776	0.152527	0.177517	0.1283	-0.000469965	0.378685	0.400867	-0.150169	0.0290573	0.185851	0.201213	-0.0731382	0.0947351	-0.160555	0.116045	-0.0560759	0.0350253	-0.0903298	-0.0894163	-0.0589785	0.101592	0.0449258	0.133769	-0.116494	0.0651345	0.125329
AGAACACG	0.41992	0.45365	0.164248	0.201366	0.144843	0.0382215	0.0553267	0.157655	0.155795	0.0762178	0.150038	0.152614	0.0277123	0.045208	0.00125884	-0.0495838	0.155363	0.0537547	0.0574335	0.138887	0.0716047	-0.00130318	0.0301252	0.0254195	-0.0798114	-0.00705913	0.117076	0.246504	0.326388	0.326476	0.156772	0.300834	0.163677	0.116329	0.0804441	-0.128819	0.173983	-0.108831	0.213598	0.0129612	0.124834	-0.224795	0.00484507	0.0310098	-0.0595899	0.0464559	0.197502	0.0846325	0.262349
CGTGTTCA	0.418812	0.451162	0.157544	0.210813	0.085087	-0.140121	0.267793	0.309675	0.0253881	-0.184771	0.235979	0.287536	-0.00819461	0.0722244	0.192958	0.102504	0.0379185	0.211213	0.00196043	0.198111	0.0410421	0.176343	-0.0290038	-0.0152185	-0.0944457	0.186884	0.249086	-0.0159549	0.159689	0.152518	-0.0647704	-0.18041	-0.0172825	0.0126883	-0.0665293	-0.0704323	0.224579	0.270176	-0.0171374	0.192641	0.0703569	-0.172816	-0.018176	0.044695	-0.0472275	-0.0203544	0.0203737	-0.182391	-0.177989
ACGTGTCC	0.427619	0.451329	-0.187615	0.0650822	-0.0359532	-0.193554	0.0294848	0.106227	-0.0262645	-0.0567082	-0.0446055	0.0574564	-0.168825	0.0792483	-0.330364	-0.0973732	-0.0598009	0.0157032	-0.241794	-0.048208	0.0491515	0.15407	-0.357025	-0.130103	-0.0465287	-0.028604	-0.00188426	-0.00171009	-0.198297	0.0132895	-0.288941	-0.192812	0.0805712	-0.156384	-0.0963978	-0.134104	-0.0288906	-0.186967	-0.0322175	-0.0782995	-0.0438546	0.0649078	-0.3065	-0.146725	-0.25784	-0.202549	-0.145593	-0.194692	-0.226761
ACGACACG	0.425267	0.452241	0.0462876	0.263336	-0.0579538	-0.11945	0.230537	0.178964	0.061528	0.0209074	-0.0251872	0.0948841	-0.0161555	0.042221	0.115714	0.114268	0.0864455	0.0648889	0.0894199	0.209531	0.00665618	0.106374	-0.0636757	0.055594	0.0474319	-0.213787	0.195907	0.0536564	0.144635	-0.0706629	0.0539725	-0.00931598	0.123873	-0.0209362	0.0158903	0.0504292	-0.0683338	-0.0307388	-0.0233923	-0.0971612	-0.0138303	0.0962343	0.0359719	0.00485715	-0.1266	0.0928053	-0.0152463	0.0835227	-0.145717
ACACGGAA	0.425383	0.454121	0.286445	0.36794	-0.166354	0.0644059	0.266792	0.348153	0.0994727	0.0999185	0.160382	0.277513	0.114252	0.0750305	0.20425	0.316435	0.326358	0.234812	0.0768813	0.334349	0.0557155	0.159188	0.209621	0.191085	0.242055	0.239515	0.268499	0.101413	-0.120135	0.26741	0.0345704	0.133071	0.0819925	0.233778	-0.149621	0.0968476	-0.102872	0.0965855	0.0866555	0.159765	0.0291875	0.16558	0.015135	0.221769	0.0282969	0.204107	0.0290925	0.0851295	0.134334
ATTTCGTG	0.427904	0.468068	-0.016076	0.198743	-0.107883	-0.112321	0.349108	0.391692	0.0215819	-0.0292033	-0.13363	0.160998	-0.195861	0.0164261	-0.160206	0.180065	0.156212	0.198425	-0.071032	0.341649	0.0348196	0.0980471	-0.220066	-0.152433	-0.122113	0.0360133	0.0236189	-0.154516	-0.0465287	-0.152433	-0.212436	-0.113549	0.0433252	-0.0522896	0.166932	0.170129	-0.0662207	0.0481268	0.00546567	0.121229	-0.109745	-0.0152406	-0.257512	-0.0480688	-0.280967	-0.0082041	-0.3011	-0.100789	-0.221681
CCGTGACA	0.413514	0.460693	0.0133596	0.241565	-0.288606	-0.111238	0.360984	0.450973	-0.18962	0.00861255	-0.0729817	0.206058	-0.216115	-0.00253161	-0.0779275	0.297852	0.348549	0.193009	-0.148812	0.360592	-0.105257	0.041159	-0.0956225	0.142451	-0.182102	0.0777185	0.202293	-0.250864	-0.220831	0.0897948	-0.134294	0.147731	-0.211351	0.116097	-0.249485	0.20198	-0.0786958	0.0745296	0.0234388	0.286281	-0.270115	0.141235	-0.216241	0.12105	-0.081178	0.089803	-0.262342	0.0916774	0.105115
GTCACGGA	0.430816	0.466887	0.0098925	0.148735	-0.299568	-0.0854164	0.392954	0.461034	-0.214691	0.0448391	-0.0566302	0.191158	-0.0125056	0.120969	0.103717	0.207736	0.422527	0.196305	0.124198	0.357214	-0.222113	-0.162709	-0.110568	0.0231344	-0.133724	0.0554348	0.0548832	-0.245223	-0.274473	0.0246246	-0.0319533	0.0318119	-0.0355515	0.0228655	0.0296556	-0.0547982	-0.114997	-0.11107	0.099311	0.124942	-0.292082	0.117247	-0.186328	0.111682	-0.200393	-0.00782126	-0.0964494	-0.066578	0.112969
GTCACGAA	0.206184	0.411581	0.13374	0.351704	-0.0975252	0.0674384	0.359176	0.45318	-0.0444858	0.123268	0.0859358	0.304815	0.0893373	-0.0279836	0.0877006	0.289208	0.245613	0.304537	0.0884107	0.373721	0.139535	0.219017	0.0291157	0.210394	0.259873	0.180748	0.373024	0.0923899	0.0200793	0.291851	0.0828914	0.271751	0.244257	0.247585	0.060078	0.196387	-0.0423599	0.0281812	0.102636	0.288785	0.00966664	0.0151238	-0.0879689	0.225204	0.13223	0.154806	0.000876917	0.274244	0.211337
ACATGTGA	0.0352691	0.244402	-0.0445058	0.199095	-0.184466	-0.121824	0.446591	0.468931	-0.0707686	0.138832	-0.103386	0.154086	-0.138934	-0.0151838	-0.0560363	0.0916143	0.0605	0.116539	-0.114448	0.0179275	0.3817	0.432463	-0.0333785	0.0536167	0.392417	0.21917	0.348108	0.0530202	-0.0123463	0.179703	-0.0480017	0.0988901	0.0597241	0.0846396	-0.00864436	0.186656	-0.112726	0.170594	-0.088594	0.0981375	-0.136754	0.104187	-0.0390481	0.0922653	-0.0545041	0.182109	-0.0782303	0.156461	0.0456423
ACTACGGA	0.0312571	0.163696	-0.185699	0.171416	-0.126922	-0.041926	0.451522	0.475713	-0.216431	0.207568	-0.23363	0.207061	-0.179317	-0.0374418	-0.283863	0.142129	-0.00583644	0.111926	-0.110735	0.0206632	0.173235	0.400061	-0.0294523	0.259147	0.291342	0.195957	0.301154	-0.286328	-0.180134	0.123115	-0.0476315	0.077949	-0.192445	0.172973	0.168159	0.373441	-0.17167	0.158749	-0.173518	0.227579	-0.165956	0.0640052	-0.177469	0.203649	-0.242713	0.119494	-0.146344	0.28055	0.0813251
CGTAGTGA	-0.0919929	0.257555	-0.0798666	0.139568	-0.0438	-0.0965528	0.464678	0.478048	-0.18729	0.227472	-0.154363	0.248297	-0.140782	-0.0416983	-0.191009	0.0737324	-0.0648209	0.190424	-0.0965448	0.132449	0.256056	0.352211	-0.0776888	0.123834	0.343709	0.316955	0.308432	-0.100789	0.0513392	0.140341	-0.23439	0.0358652	-0.15986	0.110156	0.113429	0.191426	0.1086	0.179365	-0.123359	0.203517	-0.148812	-0.0313728	-0.0493606	0.0629844	-0.125181	0.106104	-0.229757	0.156867	-0.108407
CACTACGG	-0.0905316	0.0947656	-0.21209	0.0466114	-0.0684342	-0.239041	0.463058	0.454324	-0.308938	-0.0524618	-0.197062	0.0621993	-0.282681	-0.0717197	-0.262893	0.0230398	-0.0680359	-0.120901	-0.153165	-0.0416524	0.22405	0.302069	-0.185078	0.0959641	0.281679	0.125552	0.178151	-0.243533	-0.224949	0.113017	-0.342829	0.0998286	-0.251713	0.00242134	-0.159176	0.252747	-0.118046	0.125595	-0.326122	-0.0795731	-0.197062	-0.0270062	-0.203339	0.10512	-0.263451	-0.0819392	-0.204239	0.0332322	-0.26073
ACGTAGTG	0.337215	0.332203	0.0895929	-0.0111545	0.0725349	-0.360206	0.465464	0.438471	0.18302	-0.0864759	0.0763158	0.1454	0.261662	0.0271657	0.24696	0.188828	0.282868	0.187667	0.19889	0.259017	0.173312	0.00355626	-0.00446197	-0.180688	0.260291	0.166622	0.0874769	0.209878	0.0603089	-0.0129008	0.211122	0.0793297	0.127684	0.0359319	-0.0700774	-0.094505	-0.0126223	-0.0576975	0.111956	0.0579853	0.0900177	-0.107058	0.0969504	0.123644	0.0716678	-0.0311987	0.0168106	-0.136856	0.144408
CTAGTCAC	0.34493	0.342297	0.304425	0.237485	-0.227819	0.0546439	0.466529	0.451468	0.128032	0.265185	0.117188	0.287628	0.129541	0.199064	0.299018	0.322023	0.390332	0.388065	0.370828	0.35726	0.0118121	0.179726	0.0491432	0.20671	0.120748	0.24561	0.181624	0.102067	-0.0562743	-0.0456104	0.202898	0.317954	-0.11986	0.103937	-0.0351036	0.257246	-0.0874528	0.0364898	0.113395	0.175365	-0.0171595	0.0998751	0.00896551	0.266493	-0.0289753	0.141031	0.0171344	0.180307	0.194985
GTGACTAA	0.299674	0.369653	0.0624081	0.195039	-0.137161	0.0465634	0.450854	0.449876	-0.155129	-0.0123162	0.0638577	0.222194	0.0274382	0.170149	0.168187	0.374624	0.272469	0.129662	0.337817	0.354408	-0.254668	0.110963	-0.0177624	0.0403048	-0.00631883	0.0873171	0.0800735	-0.161979	-0.167572	0.132577	-0.175449	-0.0723911	-0.182681	0.0455944	0.012262	0.0461654	-0.0768342	-0.0605886	-0.0855759	0.0981027	-0.213966	-0.0181207	-0.0482043	0.0904058	-0.164397	0.0630424	-0.0554541	0.0473305	-0.123882
GTGACTTA	0.36548	0.386796	0.233139	0.119684	0.00299484	-0.110846	0.452235	0.421294	0.00393788	-0.023249	0.296991	0.264619	0.0628152	-0.0328273	0.16405	0.175464	0.318401	0.333127	0.199986	0.3471	0.0492157	0.0395755	0.0811041	-0.114086	0.0877813	0.09083	0.19303	0.123356	0.0650723	0.152344	0.0911373	0.0408278	0.0889783	0.0443886	0.232531	0.14266	0.112563	0.11005	0.226899	0.246122	0.18714	-0.0234089	0.0477194	0.0674265	0.117343	0.00307555	-0.0275271	-0.0887757	0.029619
CATGTGAC	0.407345	0.355165	0.0858514	0.00893313	-0.150031	-0.040904	0.466436	0.418844	-0.188606	-0.0040495	-0.114267	-0.0638934	-0.300656	-0.173049	-0.0139084	0.0249638	0.191902	0.037679	-0.195861	0.0415426	-0.170774	-0.007768	-0.0711789	-0.0676152	-0.0211068	0.01752	-0.0457429	-0.138828	-0.1383	-0.105159	-0.0601744	-0.179317	-0.224565	-0.174232	-0.106905	-0.104287	-0.228988	-0.173283	-0.15784	-0.0360825	-0.134486	-0.170997	-0.192812	-0.00421419	-0.123062	-0.152578	-0.347108	-0.337366	-0.0678495
AGTCACGC	0.41919	0.37303	0.185846	0.14852	-0.0696536	-0.230103	0.458865	0.444016	-0.214388	0.0195751	0.287672	0.225756	0.170923	0.178474	0.294402	0.309114	0.40519	0.31462	0.401389	0.418512	-0.15784	0.107209	-0.112843	0.0525193	0.104521	0.0760472	0.13598	-0.102965	-0.0827639	0.0152116	-0.0617673	-0.0180273	0.0649993	0.139375	0.358937	0.30249	-0.131515	0.00184417	0.227583	0.227815	-0.0662503	0.0454538	-0.090099	0.0737379	-0.0460435	0.0472225	-0.168403	-0.0617659	0.0444158
GATGTGAC	0.437648	0.445111	0.164724	0.186034	-0.197881	-0.130103	0.457282	0.439137	-0.206098	-0.095411	0.173401	0.230262	-0.0344532	-0.0704261	0.370507	0.347172	0.338839	0.310751	0.284538	0.432821	-0.175203	0.0429837	-0.170553	-0.0598391	0.088448	-0.0596067	0.16863	-0.171444	-0.142251	0.0266908	-0.165365	-0.127984	-0.113787	-0.120482	-0.00262369	-0.0756295	-0.176955	0.0171284	0.115691	0.0595979	-0.103858	-0.0189033	-0.0269346	-0.10381	-0.0704684	-0.11296	-0.249349	-0.195861	-0.066798
CGTGTGAC	0.465866	0.432853	0.15774	0.0727581	-0.0474216	0.00498028	0.46885	0.377613	-0.164397	-0.11463	0.0714313	0.0201148	-0.0300001	0.0829618	0.0443691	0.121634	0.289679	0.159443	0.207478	0.22061	-0.167778	-0.0687205	-0.153462	0.0033007	-0.0374203	-0.0526237	0.0454634	-0.16968	-0.123062	-0.0901221	-0.0730027	-0.12815	-0.0597338	-0.0882255	-0.00255542	-0.0389881	-0.0235126	0.0321372	-0.023101	0.169352	0.0310263	-0.0835421	0.00276855	0.0218165	-0.219586	-0.0415367	-0.112436	-0.0983205	0.122496
ATCGTGAC	0.451331	0.437639	0.219925	0.0184211	-0.0733754	-0.0744236	0.473527	0.411713	-0.00521156	-0.204431	0.0467478	0.0333981	-0.152143	0.0500903	-0.00224465	0.0482043	0.371847	0.171263	0.175782	0.191903	-0.0767896	-0.209963	0.0164708	-0.0192869	0.0149723	-0.0791572	-0.181816	-0.0711983	0.03019	-0.0475645	0.104867	0.187101	0.0644212	-0.110237	0.0430885	-0.0757742	0.18137	0.169872	0.364118	0.436223	-0.0543796	0.0734813	0.0626384	-0.0676581	-0.0142305	0.0146449	0.00134431	-0.0999713	0.287087
GGTCACGA	0.441776	0.432669	0.0293632	0.0515928	-0.0750425	0.0163395	0.475746	0.45672	-0.026179	0.012514	-0.0129383	0.176351	-0.00743698	-0.00453861	0.141191	0.16756	0.255486	0.110697	0.235453	0.314982	-0.109909	-0.0613808	-0.198297	-0.0642359	0.0463667	0.0264359	-0.00697873	-0.109313	-0.16925	-0.0962076	-0.127737	-0.0817406	-0.2	0.0313124	-0.0756315	-0.0996014	-0.286967	-0.156067	-0.0416186	-0.03752	-0.14908	0.0613762	-0.14318	0.00836463	-0.211919	-0.120343	-0.119314	-0.159688	-0.0615138
AGTCACGA	0.402048	0.415047	0.0876276	0.0377944	-0.130539	0.117367	0.481805	0.466156	0.00376922	-0.0299812	-0.0529704	0.0294365	0.0230272	-0.102411	0.223779	0.284272	0.241979	-0.0769314	0.100515	0.246667	-0.0339279	-0.0458275	-0.078063	-0.0945636	0.0378947	0.00297676	-0.0481935	0.0274889	0.0743916	-0.0296791	-0.00243633	-0.156543	-0.102136	-0.18041	-0.106399	-0.100745	0.0342367	-0.0451106	0.112249	0.0502477	-0.0779777	-0.136754	0.0574279	0.113703	0.0202465	-0.160555	-0.166154	-0.15784	-0.0742946
AAGTCACG	0.436737	0.38432	0.190874	0.0967365	-0.144009	-0.18729	0.486538	0.47293	0.0196222	0.102211	-0.0565251	0.077938	-0.0172929	-0.0814342	0.156259	0.0183827	0.330772	0.164027	0.0698926	0.17631	0.0938746	0.215084	-0.00768814	-0.0803503	0.24301	0.0871205	0.14553	0.0680737	-0.0695641	0.0066412	0.0536799	0.10913	-0.0862355	-0.0435012	-0.155596	-0.024593	-0.187615	-0.16216	-0.0422801	-0.00283731	-0.0390169	-0.0197497	-0.0395634	-0.00721956	-0.0670958	-0.0827476	-0.0792078	-0.18962	0.116038
CGTGACTA	0.401488	0.384561	0.175407	0.210029	-0.134775	-0.122403	0.481113	0.467805	-0.0556232	0.108988	-0.0549876	0.221794	0.0853126	0.166298	0.325292	0.400311	0.368946	0.29266	0.314146	0.408352	-0.136351	0.0100792	0.0129882	0.164721	0.140515	0.176887	0.212246	0.0485844	-0.047427	-0.00238936	-0.0174133	0.040153	-0.0641812	-0.0644989	-0.131695	0.0702762	-0.0256882	-0.0488151	0.105556	0.170915	0.0545187	0.0933394	-0.0362829	0.112744	0.157735	0.0767744	-0.185699	0.0223022	0.123944
CAAGTCAC	-0.0387166	0.0621548	0.117699	0.142727	0.452351	0.4208	0.0303139	0.0638226	0.140887	-0.120831	0.182384	0.0255851	0.0131537	-0.0165718	0.0627789	0.113579	0.0655774	-0.0901408	-0.0162982	-0.0240628	0.134808	-0.0418622	0.079942	0.0941569	0.137296	-0.111351	0.0394825	0.0929286	0.180985	-0.0643978	0.0340769	-0.0819886	0.0497325	0.0845597	-0.124949	0.0473761	0.230695	0.0205178	-0.00751296	-0.103152	0.105541	-0.0681955	0.08425	0.0490477	0.0706284	0.125626	0.131341	0.0304883	0.00542104
AAACGAGA	-0.0946802	0.0363721	0.0594272	0.0656429	0.450775	0.42809	0.0467457	0.0211138	-0.0413993	-0.0681046	0.0452727	0.0877065	0.040029	0.00581089	0.021409	0.0286331	-0.164589	0.0760179	0.12523	-0.0497072	0.0350671	-0.0256319	0.0717262	0.0286374	-0.0723162	-0.0416763	-0.0963411	-0.0648615	0.0793085	0.0123211	-0.0190816	0.0786391	0.0129956	-0.0701324	-0.029403	-0.153462	0.0316774	-0.0597197	-0.188606	0.0215231	0.0649205	-0.0766648	0.122089	0.170795	-0.00890385	0.138509	0.0448873	-0.0922883	0.0209068
ACGCGAGA	0.142491	-0.0265471	0.139652	-0.029246	0.45154	0.431804	-0.154516	0.00127748	-1.97214e-05	0.0269244	0.152907	-0.138828	0.114335	0.0197282	0.171998	0.0234733	0.0843128	-0.127084	0.198605	-0.0150722	-0.0549192	-0.00961051	0.026825	-0.0141496	-0.0228207	0.0859102	-0.017875	-0.070203	0.0199434	-0.0442133	-0.0671673	-0.0843981	-0.0384096	-0.0512703	-0.0255564	-0.156703	-0.0558828	-0.0639138	-0.0983899	-0.118442	0.0962716	-0.0168665	0.0523582	-0.00438263	-0.114206	-0.0676249	0.114111	-0.0625618	-0.0820399
GACGAGAA	0.206519	-0.0663772	0.0253666	-0.00956665	0.450127	0.436225	0.0504741	0.0595165	0.0135085	-0.0614281	0.11597	-0.0360957	0.208344	-0.234872	-0.00902825	-0.0643445	0.15877	0.0467596	0.0409268	-0.0709293	0.0621906	-0.0382443	-0.00838009	-0.116813	0.126573	0.00428719	0.0638284	-0.0155507	0.0867448	-0.0616998	0.0893564	-0.139362	0.158889	-0.0201787	-0.089384	-0.156067	-0.0307358	-0.086588	0.0263315	0.0351154	0.0622578	-0.0602515	0.0874339	0.0265644	-0.114448	0.00980731	0.00219922	-0.153165	-0.0182077
GACGAGAC	0.154439	0.0939948	0.169976	0.0303131	0.451458	0.437421	-0.00915332	0.0138462	0.0161482	0.046805	0.140285	-0.0146419	0.00885595	-0.0346722	0.0407051	-0.00282748	0.0900795	0.0589079	0.161661	0.102887	-0.000856259	-0.0309411	0.0995867	-0.0406469	0.0805162	-0.0624141	0.0476539	0.110694	0.152073	0.0546297	0.0609411	-0.0820127	0.217983	0.196891	-0.00304038	-0.00665988	-0.126841	0.0872699	0.0838486	-0.0893707	0.0562124	-0.0846094	-0.0719784	0.0528604	-0.0496173	-0.0683847	0.0918692	-0.0436824	0.0539568
ACGAGAAC	-0.082136	0.103968	-0.179588	0.160774	0.453764	0.435432	-0.0999293	0.00865755	-0.0991327	-0.0251096	-0.0613305	0.0201408	-0.204576	0.0797027	-0.130539	0.155369	0.0035807	0.043191	-0.0667537	0.0557217	-0.14828	0.129239	-0.0654811	0.134878	-0.0852212	0.0316744	0.0252004	-0.0547876	-0.0943846	0.10144	-0.192812	-0.0301716	-0.0158592	0.198638	-0.260906	0.0946812	-0.158838	0.153203	-0.02584	-0.0399996	0.00534891	-0.112726	-0.331426	0.069538	-0.275696	0.0881253	-0.227246	0.164365	-0.103433
AGTTCTCG	-0.0977403	-0.253313	-0.161261	-0.21463	0.454773	0.429524	-0.195468	-0.342022	-0.117134	-0.222113	-0.219518	-0.23363	-0.122621	-0.173755	-0.0406811	-0.220482	-0.0443498	-0.201055	-0.133913	-0.164016	-0.104383	-0.148678	-0.108145	-0.376955	-0.177211	-0.231426	-0.360906	-0.185078	-0.091771	-0.234872	-0.234872	-0.198716	-0.209583	-0.246597	-0.288606	-0.172816	-0.110679	-0.203433	-0.130803	-0.236552	-0.221681	-0.0600363	0.064617	-0.257512	-0.182102	-0.245469	-0.0397906	-0.202595	-0.258503
CCCGGGAG	0.0828197	-0.281816	-0.0282472	-0.242022	0.456701	0.433289	-0.0548842	-0.307831	-0.156384	-0.195078	-0.0981029	-0.297881	-0.0520858	-0.0153475	-0.0366386	-0.283863	0.0378464	-0.383863	-0.0780211	-0.219791	-0.190658	-0.15157	-0.118442	-0.260206	-0.181816	-0.3011	-0.297881	-0.236856	-0.0653383	-0.0178009	-0.00743785	-0.0248794	-0.12993	-0.247886	-0.144491	-0.158838	-0.151145	-0.267162	-0.24168	-0.346471	-0.0791553	-0.121325	0.195163	-0.0723313	0.0408632	-0.0224459	-0.00712212	-0.107212	-0.0147986
CGGGACCG	-0.0465222	-0.169897	-0.315181	0.0833176	0.454626	0.442435	-0.161798	-0.221753	-0.131605	-0.00518331	-0.386967	-0.177469	-0.259176	-0.150585	-0.337572	-0.105799	-0.261439	-0.124718	-0.258004	-0.03864	-0.260555	-0.10511	-0.284164	-0.158838	-0.0756461	-0.177469	-0.301547	-0.182681	-0.277989	0.00390491	-0.266959	-0.248678	-0.336957	-0.0711143	-0.288941	-0.160033	-0.319997	-0.125964	-0.228819	-0.166154	-0.352143	-0.15986	-0.201592	-0.162342	-0.242597	-0.0174301	-0.318111	-0.0710188	-0.24023
CGCCGAGA	-0.0913651	-0.16517	-0.282974	-0.125181	0.454456	0.442995	-0.114997	-0.138722	-0.0847498	-0.0945383	-0.395861	-0.382974	-0.360206	-0.163827	-0.200966	-0.194692	-0.226201	-0.217328	-0.261798	0.0311011	-0.284164	-0.16216	-0.19431	-0.286967	-0.205453	-0.228651	-0.266154	-0.192082	-0.32636	-0.0991034	-0.115181	-0.136856	-0.210458	-0.0358774	-0.00413339	-0.190658	-0.346092	-0.266154	-0.293554	-0.278516	-0.264589	-0.232606	-0.192445	-0.120343	-0.230892	-0.121896	-0.331695	0.026595	-0.276447
CGGGATCC	0.0713203	-0.0575612	-0.150724	-0.0847553	0.455861	0.443856	-0.178781	-0.111126	-0.181816	-0.0357694	-0.155752	0.00410218	-0.044091	0.0589847	-0.128988	-0.0434186	-0.144612	0.0333098	-0.0544362	0.0748888	-0.20048	-0.231158	-0.0345411	-0.154668	-0.343652	0.00134419	-0.118642	-0.16925	0.00768886	-0.164397	0.119315	-0.00115173	0.20909	-0.0682093	0.0178412	-0.0770108	-0.151286	-0.188941	-0.224033	-0.084464	-0.0584987	0.106044	0.169562	0.0433613	0.221085	0.014322	0.0615118	-0.213253	0.139499
CCGAGATC	-0.0226863	-0.148017	-0.0491992	-0.146092	0.455756	0.444974	-0.0988396	-0.130364	-0.125026	-0.0924252	-0.00599474	-0.125181	0.0714284	-0.0447321	0.0626125	-0.09057	-0.0551621	0.0892802	-0.00366892	-0.046277	-0.0964166	-0.0194653	0.060446	-0.0474077	-0.0704664	0.15748	0.0159252	-0.299568	0.00968277	0.0181178	0.00762832	-0.0788575	0.0800588	-0.0248647	0.0124764	-0.156384	0.00590573	-0.123958	-0.278516	0.0550286	0.11984	-0.00542823	0.17667	0.0726429	0.0102053	-0.14168	0.0338715	-0.136856	-0.102273
CGACGAGA	-0.133068	0.040654	-0.0736158	-0.0947218	0.451683	0.443259	0.204059	0.0439911	0.0359686	-0.178781	-0.111805	-0.0811916	-0.0585849	-0.0556283	-0.0952725	-0.0315983	0.0645351	0.0411398	-0.186012	-0.069096	0.00482545	-0.00288973	-0.0442866	-0.0856342	0.10515	0.0469385	-0.0494116	-0.0628951	-0.204001	-0.0101155	-0.0581835	0.167926	-0.249621	-0.220971	-0.170997	-0.122988	-0.173993	0.0751389	-0.19393	-0.123732	-0.137161	-0.244855	0.0554491	-0.0997307	-0.0389878	-0.0628829	-0.163264	-0.00993473	-0.290658
CGGGACTA	-0.0799108	0.0637692	-0.0443548	-0.0889697	0.451445	0.443402	0.0261377	0.130782	0.0308421	-0.0544441	0.105906	-0.0543289	0.00543242	-0.0912432	-0.120066	-0.00974635	0.0108883	0.0637857	-0.130715	-0.0406677	-0.0256014	-0.176955	-0.0133701	-0.0381384	0.134858	0.101745	0.0119761	-0.0195499	0.123032	0.085065	0.115562	0.129158	0.107666	0.29611	0.0176775	0.106775	-0.00117885	-0.182974	-0.0567164	0.0883702	0.0501617	0.189743	0.227056	0.138477	0.162204	0.150328	0.212973	0.245049	0.253773
ACGAGATC	-0.177211	-0.0626351	-0.0158892	-0.156225	0.452608	0.446895	-0.166555	-0.140121	-0.343771	0.00850611	-0.0746398	-0.2	0.030946	-0.204287	-0.137263	-0.1011	0.107466	-0.118111	0.0252602	0.0156073	-0.323284	-0.188941	-0.0942235	-0.122185	-0.213727	-0.125337	-0.258503	-0.320761	-0.273993	-0.226201	-0.211407	0.00467608	-0.202919	-0.0878286	-0.144249	-0.00048955	-0.307883	-0.170115	-0.26517	-0.164975	-0.295078	-0.0656186	-0.197881	-0.142366	-0.208407	-0.0788266	-0.237263	0.00918129	-0.205257
AATCCCGG	-0.131605	-0.12161	-0.192082	-0.211182	0.450381	0.44944	-0.139362	-0.156543	-0.154363	-0.00366396	-0.114997	-0.108938	-0.0532792	-0.246092	-0.154363	-0.182102	-0.216178	-0.0521439	-0.168403	-0.19393	-0.300833	-0.206198	-0.24908	-0.146218	-0.345593	-0.042965	-0.164782	-0.211862	-0.265561	-0.266555	-0.138934	-0.147886	-0.0885302	-0.0452951	-0.272125	-0.0720623	-0.234008	-0.35867	-0.260555	-0.224872	-0.252143	-0.102641	-0.214997	-0.286646	-0.183863	-0.324949	-0.132422	-0.266354	-0.170115
AGATCCCG	-0.145842	-0.107263	-0.0944171	-0.0506145	0.440179	0.450111	-0.110073	-0.0067043	-0.0674255	-0.0364717	-0.115552	-0.0850978	-0.0078899	0.0250225	-0.124642	-0.0368788	-0.217393	0.028516	-0.134294	-0.00327395	-0.0609761	0.0229588	-0.19914	0.00518345	-0.118442	0.142336	0.0970857	-0.121467	-0.0992957	-0.0946987	0.104762	-0.0387495	-0.103668	0.0449859	-0.132422	-0.117718	-0.0527151	-0.154363	-0.0292162	0.0458884	0.000336487	-0.0271247	-0.0352096	0.0557504	0.0342788	-0.0586477	-0.092901	0.0722258	0.0541849
ATCTCGTC	-0.0994305	-0.31986	-0.191721	0.00803393	0.441247	0.451945	-0.204287	-0.268403	-0.0848339	0.134657	-0.204769	-0.170333	-0.117328	0.0275967	-0.0601074	-0.177728	-0.256225	-0.133068	-0.0950294	-0.182102	-0.212378	0.0163442	-0.0743455	-0.165956	-0.267162	-0.199568	-0.273049	-0.161979	-0.071811	-0.157675	-0.212148	-0.264782	-0.172354	-0.21463	-0.109909	-0.269897	-0.0698486	-0.133255	-0.185387	-0.103858	-0.128233	-0.201323	-0.00552041	-0.0994532	-0.152724	-0.0288878	-0.186646	-0.0388963	-0.320621
GGCCGAGA	-0.153165	-0.2383	-0.408884	-0.0359748	0.440731	0.453726	-0.285699	-0.292445	-0.287615	0.00671739	-0.352871	-0.101055	-0.25376	-0.0123795	-0.29393	-0.114997	-0.249894	-0.149894	-0.392445	-0.0432525	-0.4	0.0328257	-0.301457	-0.11986	-0.270553	0.0216775	-0.261083	-0.316115	-0.281248	-0.0853754	-0.243063	-0.126122	-0.300656	-0.127984	-0.355284	-0.226201	-0.258838	-0.328067	-0.195468	-0.148545	-0.355752	-0.144249	-0.244009	-0.0914442	-0.154668	-0.0771484	-0.265758	-0.0066654	-0.238722
GCCGAGAC	-0.0522521	-0.186967	-0.202503	-0.179048	0.450112	0.452194	-0.0845552	-0.249621	-0.105799	-0.165365	-0.216052	-0.276955	-0.0838797	-0.0896651	-0.0736845	-0.284771	-0.120551	-0.283565	-0.142366	-0.172354	-0.160206	-0.227737	-0.175203	-0.141229	0.0162142	-0.138934	-0.207935	-0.208831	-0.260555	-0.211805	-0.180967	-0.239577	-0.0983113	-0.234486	-0.13279	-0.208991	-0.253018	-0.261618	-0.115366	-0.345346	-0.269037	-0.236552	-0.0399846	-0.150724	-0.185387	-0.325806	-0.183863	-0.189963	-0.225727
CGGGACTC	-0.0603863	-0.201011	-0.0280074	-0.0464976	0.450839	0.456709	-0.17986	-0.14828	-0.157349	-0.04259	-0.0754907	-0.173993	-0.0463837	-0.0482914	0.0681068	-0.152724	-0.164975	-0.0314332	0.0743873	-0.0336561	-0.11891	-0.169897	-0.0910597	-0.0575903	-0.0783855	-0.0259213	-0.0692928	-0.214267	0.0999912	0.0486372	-0.0933745	-0.0699513	0.0588476	-0.0504113	-0.10942	-0.184771	0.150028	-0.0432124	-0.161083	-0.0701332	-0.0175098	-0.103763	-0.0528945	-0.0502535	0.0610169	0.0583904	-0.0448033	0.0623052	-0.131966
CTCTCGTC	-0.166555	-0.101011	-0.076376	-0.0143747	0.451161	0.454476	-0.236151	-0.0609503	-0.0205115	0.108518	-0.133724	-0.0867516	-0.207058	0.0142852	-0.135067	-0.0778372	-0.207212	-0.00194481	-0.195861	0.00488522	-0.146852	-0.203198	-0.161439	-0.115677	-0.325493	0.134474	-0.138405	-0.113608	-0.0685551	-0.186328	-0.0181985	0.00179948	-0.163264	-0.16073	-0.0140458	-0.159517	-0.192445	-0.236251	-0.108831	0.0535075	0.0926947	-0.198716	-0.120204	-0.16073	-0.104431	-0.115428	-0.0135573	-0.17986	-0.0292651
TATCCCGA	0.0565061	0.0437828	0.176576	0.145811	0.450994	0.451305	0.135623	0.0747592	0.134652	0.14282	0.140122	0.0130629	0.0128545	0.096429	0.169042	0.0608313	0.131918	-0.0197047	0.156899	-0.0034344	0.0598987	0.0280403	0.0762487	-0.00551917	-0.0297227	0.0476777	-0.0445179	0.115518	0.0225892	-0.0847485	0.145701	0.0282118	0.179975	0.085536	0.0946965	-0.0155754	-0.0394665	-0.0762793	0.0973519	0.0111327	0.129386	0.10129	0.0449282	-0.0356094	0.0752786	0.0304838	0.16826	0.078782	-0.00275676
ACGGGAAT	-0.0885653	-0.0823099	-0.0336465	0.144325	0.452705	0.450599	-0.0539827	0.149883	0.0265826	0.191208	-0.0675921	0.043976	-0.11986	-0.0242079	-0.125414	0.0681853	-0.00311016	0.157263	-0.1284	0.0345125	0.0892411	-0.0405053	0.0367284	0.163589	0.196261	0.209485	0.121905	0.0922016	-0.0273915	0.15296	0.13248	0.151225	-0.0992508	0.100279	-0.259007	0.0628376	0.0366722	0.0358128	0.160235	0.27204	-0.00259629	0.0193207	0.0301547	0.193213	0.119306	0.0540613	-0.0749287	0.160908	0.175952
AGTCTTGA	-0.0704312	-0.208938	-0.275449	-0.103763	0.456363	0.451631	-0.175203	-0.203198	-0.295861	-0.00878082	-0.136653	-0.138616	-0.126122	-0.197469	-0.159176	-0.00472356	-0.167366	-0.0749058	-0.0357807	-0.103716	-0.0896408	-0.13536	-0.261439	-0.0383247	-0.147625	-0.117653	-0.146852	-0.208197	-0.145717	-0.214935	-0.177728	-0.145223	-0.140012	-0.198297	-0.284164	-0.124033	-0.180967	-0.302965	-0.187943	-0.22233	-0.241454	-0.132057	-0.0577397	-0.134199	-0.0143661	-0.160555	-0.178781	0.0217781	-0.147496
AGCCGAGA	-0.0477251	-0.107624	-0.262525	-0.144129	0.459163	0.451233	-0.174473	-0.161979	-0.285078	-0.0311406	0.0090531	-0.0297488	-0.164207	0.0449536	-0.182974	-0.12636	-0.175449	-0.0874421	-0.0582505	-0.136856	-0.224642	-0.25986	-0.238722	-0.0597866	-0.312148	0.107498	-0.078333	-0.333913	-0.278516	-0.0454577	-0.30348	0.0133759	-0.221396	0.00363889	-0.170333	0.02673	-0.145717	0.0191144	-0.285699	0.12253	-0.272816	0.0504308	-0.222113	0.192897	-0.257025	-0.0405779	-0.121254	-0.12644	-0.208092
ATCTCGGG	-0.0791473	-0.0432825	0.0970806	-0.181816	0.460561	0.452116	-0.0431406	-0.127165	-0.0876828	-0.0807229	0.0593252	-0.0194778	0.0599374	-0.089432	0.0795782	-0.0664881	0.0939493	-0.137675	0.181775	-0.0550418	-0.121042	0.0296904	0.0745691	-0.032418	-0.000463292	-0.000818979	-0.0806861	-0.0710951	-0.145967	-0.0836764	-0.0430213	0.0483013	-0.015438	-0.046635	-0.00467962	0.11028	-0.144733	-0.145593	-0.173993	-0.0391175	-0.0330758	-0.0784378	0.0443556	-0.139794	-0.0625004	-0.141567	-0.122768	0.0218525	-0.0921032
CAATCCCG	-0.10348	-0.174715	-0.00158004	-0.239254	0.462062	0.448271	0.0626955	-0.201909	-0.0857016	-0.137161	-0.148149	-0.321824	-0.0440582	-0.295078	0.0224367	-0.299568	-0.0194904	-0.178516	0.051866	-0.0588261	-0.012864	-0.249349	0.0296293	-0.275203	-0.0619789	-0.139903	-0.250446	-0.0444493	0.0401997	-0.169465	0.186445	0.0210209	-0.00549122	-0.077073	-0.0575004	-0.194692	-0.0805844	-0.219314	-0.126201	-0.205849	0.11306	-0.113966	0.0619069	-0.118509	0.0139275	-0.181531	0.0177834	-0.0768311	0.0810865
CGGGATTA	0.0654511	-0.19914	-0.0611691	0.0329329	0.462748	0.446324	0.0198812	-0.233913	-0.150724	-0.0819309	-0.0675911	-0.0822894	-0.159517	0.0228808	0.0170997	-0.12321	-0.185078	0.0804107	0.0249576	-0.0859699	-0.219723	-0.122915	-0.106651	-0.195861	-0.0723145	-0.242251	-0.243415	-0.0557541	0.00836649	-0.105061	-0.00975484	-0.203245	0.0115627	-0.232239	-0.092991	-0.239794	-0.0885626	-0.0868259	-0.139577	-0.161439	0.0363707	-0.125649	0.164152	-0.14023	0.226288	-0.0264238	-0.157025	0.0073873	-0.0921467
CTCTCGGC	-0.041486	-0.0885219	-0.125104	-0.054414	0.463376	0.454047	-0.0801184	-0.233536	-0.210018	-0.0818391	-0.202965	-0.262525	-0.107417	-0.113018	0.0248092	-0.0990821	-0.280688	-0.185699	-0.175203	-0.127003	-0.139254	-0.0257582	-0.173518	-0.104144	-0.147625	-0.0842758	-0.102228	-0.202365	-0.0142865	-0.127246	-0.0142719	-0.0712467	-0.154212	-0.117457	-0.267572	-0.245346	-0.103245	-0.0797599	-0.0813205	-0.221042	-0.0480679	-0.155909	0.131791	-0.186967	0.0198499	-0.0904193	-0.027041	-0.237263	-0.159007
ATCGGGAG	-0.197881	-0.102872	-0.219654	0.0267432	0.471053	0.453108	-0.200966	-0.0947045	-0.213253	-0.0163519	-0.299568	-0.159346	0.01301	-0.0248086	-0.0374567	-0.0445037	-0.230277	-0.0908583	-0.137161	-0.0378475	-0.163639	-0.0884682	-0.179588	-0.0619653	-0.144612	-0.0451872	-0.0991051	-0.213371	-0.180134	-0.0675366	0.093344	-0.0762768	-0.108145	0.0297839	-0.123433	-0.06568	-0.0599127	-0.00647286	-0.163451	-0.0160361	-0.160906	0.195641	-0.0128604	-0.0892661	-0.109098	-0.124642	-0.0095457	0.00136376	-0.00359422
AATCGGGA	-0.0628594	0.050528	-0.159007	0.0961012	0.470993	0.453948	-0.083714	-0.0944312	-0.128067	0.158209	-0.222113	-0.00538652	-0.110902	0.113242	-0.251428	0.046745	-0.182391	-0.0616445	-0.347625	0.0991528	-0.203058	-0.132975	-0.168825	-0.0095172	-0.192082	-0.114206	-0.0492718	-0.218709	-0.16073	0.0658961	0.0516003	0.0488458	0.00861693	0.0279232	-0.287615	-0.0407226	-0.075572	-0.0968976	-0.0976061	-0.024176	-0.173283	0.00606763	0.0021482	0.00561152	-0.101011	0.0521869	-0.137366	0.176295	0.136709
ATCGGGAC	-0.105948	-0.15157	-0.228067	-0.0219862	0.463412	0.455551	-0.291009	-0.12644	-0.00082823	0.0258995	-0.181816	-0.0349771	-0.0142412	-0.115428	-0.196257	-0.11549	-0.140561	0.0666151	-0.0120201	-0.103905	-0.233255	-0.17122	-0.118977	-0.00114161	-0.0863083	0.1339	-0.092835	-0.152871	-0.13279	-0.122548	0.0039612	-0.126761	-0.0958848	-0.0632227	-0.0618315	-0.125964	-0.212843	-0.207109	-0.275696	0.063385	0.0326699	-0.130277	0.0833251	0.0237793	-0.0215276	-0.16038	0.00179915	-0.125649	0.0587265
CGAGATCC	-0.122257	0.0120818	-0.0880019	0.116619	0.461852	0.45981	0.070344	-0.00487388	-0.0292045	0.0934735	-0.131069	0.0728419	-0.22815	-0.0666672	-0.153462	0.0613808	-0.120273	0.0392105	0.0510726	-0.0264004	-0.0306364	0.0113971	-0.0254746	0.110999	-0.0182324	0.00129258	0.120991	-0.0251199	0.00260358	0.118924	-0.173049	-0.0553278	-0.145223	0.0809897	-0.260906	0.0329261	-0.0541543	-0.157349	0.131047	0.027185	-0.0631935	-0.0225869	-0.186646	0.0903423	-0.0405759	0.0790316	-0.164589	0.0918901	-0.05362
TCGAGAGA	-0.00919334	0.00162413	-0.0922556	-0.12321	0.463884	0.460929	0.0163418	-0.15867	-0.175449	-0.0525728	-0.117198	-0.118046	-0.0507943	-0.065343	-0.0416235	-0.208884	-0.174958	-0.216749	-0.19393	-0.0145635	-0.125806	-0.0567334	-0.166154	-0.0491445	-0.15391	-0.0922218	-0.0791397	-0.120343	-0.267366	-0.140561	-0.0735437	-0.0937629	-0.0643812	-0.0476669	-0.0451713	-0.122768	-0.14034	-0.135556	0.041667	-0.138722	-0.114752	-0.147625	-0.0279462	-0.183565	0.00788485	-0.0563802	-0.168194	-0.130016	-0.0747115
CATCGGGA	0.0415385	0.0357294	-0.132331	-0.109366	0.463939	0.461212	-0.189963	-0.030644	-0.0721914	-0.017494	-0.0743554	-0.0122862	-0.0139713	-0.0891844	-0.0558025	-0.051456	0.0673847	0.0529128	-0.109044	-0.105651	-0.221681	-0.306349	-0.164782	-0.130103	-0.0595045	-0.147756	-0.098818	0.0740502	-0.186012	-0.10278	-0.103058	-0.0267117	-0.0176208	-0.0740411	-0.0923797	-0.147237	-0.298297	-0.0970405	-0.0497432	-0.000515911	-0.12815	-0.011706	0.0101041	0.0169776	-0.198297	-0.101592	0.0179682	0.0203846	0.0598929
CGAGAACC	0.117329	-0.114026	-0.266354	-0.151004	0.463266	0.465209	-0.0463288	-0.174958	-0.216622	-0.208566	-0.122113	-0.171444	-0.261439	0.0162771	-0.100966	-0.0870894	-0.230892	-0.0295716	-0.168194	0.00977438	-0.19393	-0.329585	-0.262525	-0.0316244	-0.116813	-0.183863	-0.14828	-0.189963	-0.348812	-0.160206	-0.370115	-0.155752	-0.0987488	-0.292445	-0.241908	-0.217718	-0.19393	-0.138934	-0.199568	-0.0630688	-0.268613	-0.244491	-0.235952	-0.141794	-0.332057	-0.208355	-0.421325	-0.283268	-0.361261
CGGGAGTC	0.233375	0.103729	0.198956	0.0885626	0.466405	0.464659	0.0912578	0.159123	0.0330781	0.13713	0.180164	0.116948	0.115529	-0.173755	0.0706002	0.099205	0.111351	0.105258	0.119137	0.0223402	0.133422	0.153612	0.133806	0.0953753	0.111311	0.0914071	0.122338	0.178783	0.159901	0.0602017	0.184418	0.104297	0.104647	0.138551	0.0345153	-0.0819501	0.0706943	0.0533848	0.030748	0.0386136	0.103712	0.0103872	0.114839	-0.0107714	0.0776254	0.0815605	0.0166485	0.0720145	0.096496
ACGAGAAT	0.113731	0.258238	0.0857786	0.276485	0.466631	0.466685	-0.0675625	0.137017	-0.0356478	0.152158	-0.0726895	0.165861	0.0651188	0.19202	-0.00744337	0.20532	0.0489639	-0.087432	-0.092484	0.203648	0.0323864	0.116861	0.0099056	0.179014	0.0133536	0.016912	0.126046	-0.031428	0.103686	0.381446	0.00573933	0.0626807	0.390987	0.462628	0.0422709	0.157661	-0.0263721	0.102955	-0.0334717	0.0881539	0.0468415	0.075718	-0.0653399	0.187937	0.0535039	0.202707	0.0555404	0.216752	0.0147999
CGAGAACA	0.0148398	-0.032191	-0.00197002	0.132727	0.465542	0.467298	-0.0664332	0.126621	-0.101457	0.278734	-0.107314	-0.163451	0.0920104	-0.0757692	0.0691671	0.056993	0.0484391	-0.0841038	-0.0110029	0.0751297	-0.1284	-0.13279	0.0205536	0.116897	-0.0175703	-0.0580216	-0.0102175	0.0312789	-0.251145	-0.0704031	0.0100049	-0.0862902	-0.0528528	-0.0372172	-0.0676888	-0.197062	-0.201637	-0.184466	-0.218977	-0.164589	-0.142022	-0.173283	-0.0307708	-0.0386234	-0.0503091	0.10935	0.0485749	0.0651461	-0.160555
AAATCCCG	-0.159176	-0.0691427	-0.160555	0.00680129	0.464903	0.467536	-0.173283	0.0431261	-0.186646	0.0935322	-0.252288	-0.039083	-0.190309	-0.0132887	-0.108778	-0.0204281	-0.24828	-0.108938	-0.195078	0.0432162	-0.225649	-0.10716	-0.27986	0.0157068	-0.0850852	-0.0954712	-0.00780296	-0.152143	-0.19393	0.08603	0.00980831	-0.044236	-0.174232	-0.130016	-0.231876	-0.0194573	-0.0586273	0.0733035	-0.127084	-0.0673549	-0.153611	-0.0540039	-0.0256082	-0.0575553	-0.0498029	0.100153	-0.106148	-0.0360823	-0.0503667
ACTCTCGC	0.154156	-0.100524	-0.0630883	0.0672512	0.469139	0.469523	0.0559221	0.0463397	0.0937914	-0.0260606	-0.0747203	-0.0835228	-0.110958	0.0540758	-0.129414	0.113181	-0.145842	-0.00122319	-0.0939125	0.109735	0.0285681	0.0797888	-0.177989	-0.00515161	-0.216622	0.0107095	-0.0990434	-0.0655378	0.0257826	0.220707	-0.130364	-0.107988	-0.0471074	0.0049613	-0.148812	-0.110127	0.107769	0.181618	-0.023545	-0.0131066	0.131821	-0.094918	0.134903	0.100819	-0.107263	0.0756657	-0.0782598	0.133541	-0.130016
CGGGAGTA	-0.134679	-0.114448	-0.0383528	0.0198742	0.467021	0.472928	-0.0802973	-0.0993324	-0.112436	0.06462	-0.0579849	-0.0861378	-0.01602	0.132283	0.184951	-0.141005	-0.0594009	-0.201909	0.0681817	0.071762	-0.165956	-0.1284	-0.0579323	-0.0712458	-0.134104	-0.188941	-0.111577	-0.0405135	0.0323558	0.0401504	0.00906185	0.0528195	0.0587629	0.0645486	0.0465004	-0.0243859	0.1032	-0.00618702	0.0622899	-0.0820517	0.00282535	0.0411487	0.140779	0.0115008	0.12924	0.00359502	0.0279578	0.0716522	-0.0640254
CTTCTCGA	-0.00842715	-0.0527836	-0.0317986	-0.0760788	0.460156	0.47348	-0.148149	-0.086263	-0.216304	-0.131966	-0.116368	-0.00252968	-0.221325	-0.0678953	-0.236754	-0.107469	-0.136754	-0.1383	-0.0833188	-0.077398	-0.0994095	-0.0836451	-0.121968	-0.181816	-0.107727	-0.246092	-0.123882	-0.173283	0.205041	0.275083	-0.202641	-0.0468984	0.15558	0.249803	-0.218243	-0.0915839	-0.191364	-0.00113875	-0.132698	-0.0211579	-0.157349	0.0667534	-0.228067	-0.129757	-0.216368	-0.0635659	-0.220273	-0.0925396	-0.118111
CGAGAACG	-0.172354	-0.123359	-0.249757	-0.0192211	0.455254	0.474613	-0.161439	-0.223958	-0.242366	-0.109528	-0.259346	-0.154061	-0.238195	0.0916678	-0.225493	0.0230109	-0.116494	-0.309205	-0.3057	-0.0572499	-0.297881	-0.301278	-0.232057	-0.148945	-0.190658	-0.290309	-0.210735	-0.242136	-0.366555	-0.21945	-0.213371	-0.186328	-0.206098	-0.126043	-0.173049	-0.161618	-0.405453	-0.204048	-0.211295	-0.14318	-0.182391	-0.00859976	-0.254061	-0.0731055	-0.261798	-0.0747043	-0.238722	0.0299828	-0.188606
CGGGAATC	-0.120066	-0.104479	-0.222257	0.0617906	0.460129	0.474887	-0.369037	-0.0505036	-0.161261	-0.0599025	-0.252578	-0.231247	-0.167366	-0.0758013	-0.0572155	-0.100261	-0.262893	-0.128067	-0.0734925	-0.126043	-0.3011	-0.0561167	-0.166555	-0.0870965	-0.261798	-0.113253	-0.169897	-0.174715	-0.0720561	0.198459	-0.138722	0.0393779	-0.0742809	-0.0683988	-0.331158	-0.177211	-0.251856	0.0781109	-0.121112	-0.0515186	-0.222403	-0.0347754	-0.280967	-0.0809036	-0.181248	-0.0577315	-0.100524	0.0964504	-0.164397
GTTCGGGA	0.0141615	0.0637843	-0.309151	0.175688	0.463225	0.475759	-0.237469	-0.214569	-0.303012	-0.190309	-0.247496	0.0850973	-0.0212485	-0.0574101	-0.216368	0.14962	-0.106399	-0.0784608	-0.125649	0.201533	-0.152143	-0.234486	-0.264016	-0.12652	-0.295468	-0.161261	-0.0517314	-0.206956	-0.274232	0.126981	-0.25544	-0.205061	-0.295861	0.0200354	-0.218376	-0.0626235	-0.278516	-0.109583	-0.156703	-0.0536669	-0.277728	0.0462343	-0.305502	0.0729113	-0.228988	0.0164921	-0.251713	0.124857	-0.254061
CCCGAGAA	-0.164207	-0.16517	-0.328233	-0.107935	0.46582	0.475875	-0.209637	-0.252578	-0.173755	-0.206702	-0.267985	-0.191009	-0.25391	-0.0521852	-0.366756	-0.146725	-0.154363	-0.161439	-0.136151	-0.231966	-0.336653	-0.253611	-0.32815	-0.187615	-0.147237	-0.177989	-0.252288	-0.286328	-0.208619	-0.0287403	-0.159517	0.133817	-0.270997	-0.116431	-0.0448317	-0.092344	-0.236856	-0.140121	-0.296257	0.0478304	-0.300436	0.0668496	-0.0667628	-0.0898143	-0.230803	0.117082	-0.123582	0.000364274	0.000559744
GGTCGGGA	0.091149	-0.0932003	-0.106601	0.0875292	0.466799	0.473748	-0.0163483	-0.113549	-0.0267417	-0.0552529	-0.0525016	0.0768867	-0.0254898	0.0835835	-0.0676872	0.0980184	0.017802	-0.0138706	-0.00785596	0.121636	-0.0577256	-0.0519911	-0.00842399	0.0527988	-0.215802	-0.0599407	-0.0380937	-0.0715578	-0.0587434	0.0414612	-0.150446	-0.0175378	-0.0942928	-0.0289817	-0.00518096	-0.0618174	-0.144129	-0.127572	-0.16038	-0.096292	-0.0700824	0.020754	-0.0336193	0.040838	-0.19914	-0.000871676	-0.133724	0.00262652	-0.192082
ATTCTCGG	0.0571219	-0.156384	0.058807	-0.105799	0.468539	0.47599	-0.0656729	-0.094445	0.0792726	0.0962809	-0.0450726	-0.271897	-0.103152	-0.105799	0.113138	-0.0712178	-0.0268501	-0.0663352	0.0668243	-0.0162792	-0.0804026	-0.0538955	0.0298924	-0.100436	-0.139254	0.100134	-0.105601	0.044788	0.0918012	-0.0472494	0.138958	-0.0739039	0.0945523	-0.000974242	0.00145289	-0.0911017	-0.00685213	-0.10348	-0.00162957	-0.0986906	0.163838	0.0599958	0.0752218	0.0293818	0.0329766	-0.142366	0.0727699	-0.0773034	0.141325
ATCCCGAA	-0.0205357	-0.261083	-0.0277399	-0.156703	0.466244	0.479501	-0.262525	-0.246092	-0.366555	-0.124109	-0.407263	-0.264589	-0.113194	-0.131966	-0.0693601	-0.173049	-0.203105	-0.0904231	-0.0857276	-0.19393	-0.26925	-0.146725	-0.0477579	-0.345717	-0.255909	-0.29431	-0.220621	-0.402503	-0.292445	-0.169465	-0.197469	-0.178252	-0.244612	-0.286646	-0.0505235	-0.281816	-0.263078	-0.272125	-0.310347	-0.138091	-0.26968	-0.172354	-0.0746347	-0.352288	-0.127737	-0.215243	-0.114206	-0.0264352	-0.132239
GCTCGGGA	-0.118046	0.000521699	0.153094	-0.06814	0.469396	0.477397	-0.0259158	-0.0803153	0.0187083	-0.0787245	0.0293855	-0.0487565	0.0403263	0.0131702	0.223848	-0.0965761	-0.0557456	-0.0317254	0.182243	-0.184466	0.0608534	0.0915459	0.130831	0.065462	0.111703	-0.0776727	0.0361815	-0.030105	-0.0232907	-0.0263668	-0.0251026	-0.1383	0.036347	0.0820687	-0.0225998	0.046185	-0.100922	-0.117457	0.105404	-0.162893	0.00539185	0.111562	-0.0407161	0.0586412	0.0307125	0.0141479	0.0890397	0.0110439	-0.0898641
AAATCTCG	0.140783	0.00393673	-0.0216572	0.0301047	0.471964	0.477437	-0.194692	-0.158004	-0.199568	-0.0474692	-0.232148	-0.119586	-0.0857661	-0.0330497	0.0462336	-0.099834	-0.0153335	-0.119044	-0.0627362	-0.0659492	-0.165561	-0.225026	-0.11107	-0.0950418	-0.128567	-0.15817	-0.226122	-0.0982362	-0.171897	-0.0700046	-0.10942	0.0131124	-0.145223	-0.140121	-0.110127	-0.237469	-0.188941	-0.120204	-0.0529815	-0.107109	0.0275772	0.103978	-0.144129	-0.102365	-0.0353011	-0.0570952	-0.0638283	-0.0348509	-0.226841
CTCCCGAA	-0.00465588	-0.28041	-0.023698	-0.137882	0.475101	0.477744	-0.133348	-0.0483847	-0.0324622	-0.0544208	-0.279588	-0.0177671	-0.109528	-0.202872	-0.05582	-0.0735352	-0.126043	-0.022512	-0.288941	-0.117457	0.175854	-0.141454	0.0473039	-0.0808636	0.107115	-0.0922607	-0.186967	0.0562594	-0.0418626	-0.141794	0.101378	-0.178781	0.0768969	-0.0511651	0.00239044	-0.0827365	-0.161083	-0.0649785	0.0269797	-0.0891892	-0.0564917	-0.203245	-0.00475829	-0.147108	-0.0408247	-0.11107	-0.181248	-0.158336	-0.0517806
AAGTCTCG	0.0928587	0.00849446	-0.0521037	-0.0180637	0.476354	0.481834	0.0907367	0.0457092	0.168627	-0.0200165	-0.00287478	0.0671161	0.0581036	0.088443	0.165773	0.131988	0.07031	0.160393	0.13583	-0.101144	0.218578	0.0720221	-0.0940028	0.121795	0.125005	0.112479	0.0547194	0.215429	0.123515	0.0160054	-0.0532929	-0.0058199	-0.0241054	0.0645722	-0.0912875	-0.0898824	0.0265183	-0.0278196	0.0684838	0.0261081	0.146451	-0.0528512	0.184268	0.134754	-0.0815377	0.0254326	-0.0289779	0.0729679	-0.0304476
CGAGAATA	-0.232057	-0.139469	-0.10348	-0.0996729	0.475215	0.483427	-0.0463834	-0.0278311	0.0136041	0.0231851	-0.0158135	-0.117718	-0.142022	-0.206198	-0.095124	-0.0435889	-0.014353	0.0425828	-0.0550306	-0.0911272	0.025298	-0.122548	-0.0751203	-0.0555159	0.031346	0.101566	-0.0241091	-0.0421691	-0.0896484	-0.122475	-0.0153055	-0.0526872	-0.125337	0.0340346	-0.115677	0.0574826	-0.0452099	-0.0168231	-0.031565	0.103678	-0.0419764	0.0539988	-0.177989	-0.00122614	-0.0806236	-0.00199157	-0.0956708	-0.00621502	-0.0394334
TATCGAGA	-0.107058	-0.198297	-0.22426	0.0838534	0.469573	0.483512	-0.220551	-0.234775	-0.239577	-0.044467	-0.164589	-9.60418e-05	-0.181248	0.0456665	-0.134872	-0.0692853	-0.202457	-0.0199857	-0.0616774	0.0909309	-0.327901	-0.0429044	-0.147756	0.0384641	-0.250169	-0.113787	-0.249894	-0.313312	-0.220901	0.0912314	-0.056821	-0.105306	-0.220204	-0.121753	-0.267778	-0.126922	-0.245717	0.0110721	-0.236754	-0.105012	-0.143652	0.113864	-0.158838	0.0479525	-0.137675	0.00849771	-0.131247	0.0941074	-0.172125
CTCCCGAC	-0.135262	-0.221396	-0.250169	-0.0793636	0.473945	0.484287	-0.254821	-0.189963	-0.234199	-0.0581452	-0.31891	-0.184771	-0.260206	0.0879781	-0.261439	-0.0208586	-0.167366	-0.309098	-0.214026	-0.077875	-0.281816	-0.0548215	-0.288606	-0.0429193	-0.297881	-0.24023	-0.209691	-0.207058	-0.283268	-0.154363	-0.414206	-0.0612277	-0.262525	-0.00165763	-0.20575	-0.0341697	-0.268613	0.0401334	-0.422621	-0.0533671	-0.3007	-0.0166569	-0.167778	-0.0740241	-0.320971	0.0433513	-0.173049	0.11484	-0.298716
GTCGGGAA	-0.0393867	-0.208249	-0.127901	-0.0372757	0.475125	0.484426	-0.286646	-0.0611231	-0.104001	-0.0614354	-0.201547	-0.127901	-0.166756	-0.0554779	-0.120691	-0.0289077	-0.0698035	-0.169037	-0.036262	0.0208752	-0.305601	-0.154668	-0.1451	-0.0386137	-0.145842	-0.168613	-0.087487	-0.131069	-0.274232	0.0226127	-0.14318	-0.181816	0.00771589	-0.062396	-0.168613	-0.113847	-0.335655	-0.0920522	-0.234294	-0.141341	-0.211976	-0.131966	-0.238195	-0.0812265	-0.257025	0.00711287	-0.14023	0.110555	-0.259346
TTCCCGAA	-0.0522617	-0.184164	-0.000129613	-0.0550552	0.476232	0.484072	-0.045905	-0.0802105	-0.125337	-0.0806475	-0.0807633	-0.108407	-0.0732502	-0.258336	0.000296434	-0.156384	-0.0248251	-0.0274404	-0.119586	-0.108725	-0.0885212	0.00937294	-0.0603977	-0.0306931	0.0399697	-0.0114067	-0.0965905	-0.0534918	-0.0249285	0.0094417	-0.178516	0.00227215	-0.049801	-0.113966	-0.315989	-0.131876	-0.074069	-0.12636	0.0371735	-0.152871	-0.247237	-0.0825318	0.0950827	-0.0598972	-0.0558024	-0.0467491	-0.168825	-0.124336	-0.143771
CAGTCTCG	-0.218977	0.0879384	0.0140683	0.183511	0.476768	0.486535	-0.145469	0.0441607	-0.124185	-0.0954755	0.0287928	0.148162	-0.134969	0.0719062	-0.244977	0.132367	0.0208912	0.148436	-0.0420519	0.198508	-0.0328117	0.133248	0.173455	0.160923	-0.182391	0.127811	0.100827	-0.111238	-0.0628387	0.00934395	-0.0638	0.00473722	-0.0423182	-0.0342481	0.0262295	-0.0257892	-0.182974	-0.0904405	-0.0716394	-0.137263	-0.0485986	-0.0947045	-0.153462	0.152545	-0.151286	0.0445635	-0.185387	0.136395	0.0882163
AATTCTCG	-0.184466	-0.175449	-0.154516	-0.196257	0.47875	0.486669	-0.173993	-0.265956	-0.325806	-0.199568	-0.261439	-0.18962	-0.225493	-0.111577	-0.204769	-0.099134	-0.157025	-0.125727	-0.127984	-0.0225938	-0.370553	-0.219586	-0.181531	-0.296257	-0.326922	-0.226122	-0.280134	-0.342136	-0.346344	-0.241117	-0.3767	-0.352288	-0.275203	-0.275945	-0.136452	-0.338616	-0.301278	-0.182102	-0.310292	-0.267366	-0.172125	-0.0726166	-0.121325	-0.255909	-0.24437	-0.263264	-0.0965167	-0.236957	-0.261618
CTCCCGAG	0.0193127	0.0783099	-0.0381327	0.0223441	0.477178	0.483315	-0.176955	0.0733413	-0.256543	0.0467271	-0.228067	0.0314839	-0.129158	-0.12233	-0.0674464	-0.0149228	0.0169825	0.0279822	0.0178016	-0.0159457	-0.311748	0.0108916	0.013901	0.08675	-0.198716	0.0583136	-0.173049	-0.247366	-0.307779	-0.0880253	-0.124565	0.0913549	-0.0430374	0.137391	-0.0544073	-0.0221712	-0.350724	-0.0694795	-0.0649626	0.119514	-0.205849	0.184055	-0.065317	0.0564269	-0.113312	-4.25383e-05	-0.127654	0.00220781	-0.138828
TCTCGAAA	-0.188273	-0.0702428	0.0955694	-0.161261	0.478	0.482752	-0.094523	-0.110237	-0.0462245	0.115809	-0.011002	-0.0149434	-0.0962717	0.124224	0.00426779	-0.122621	-0.0953427	0.00677146	-0.0426525	-0.164207	0.0741436	-0.0882643	-0.0329868	-0.0597911	0.0367926	0.0136999	-0.0423294	-0.00140641	0.0846297	-0.117653	0.0819332	-0.0579475	0.0932994	-0.142251	-0.118977	-0.0912566	-0.00291745	-0.0443799	-0.03315	0.156214	-0.0686055	-0.112436	0.0194061	-0.0305406	-0.0160486	-0.19393	-0.0450842	-0.306905	0.112637
AACTCTCG	-0.00211095	-0.359346	-0.0439707	-0.232422	0.479837	0.481465	-0.0278888	-0.323062	-0.0415236	-0.148413	0.036065	-0.306449	-0.0547602	-0.26038	0.0660192	-0.300087	0.0433167	-0.111014	0.059754	-0.13536	-0.0678926	-0.336552	0.0585515	-0.30846	-0.0637469	-0.384466	-0.286646	-0.0929135	0.171021	-0.0928129	-0.108672	-0.246725	0.0555335	-0.130803	0.0182378	-0.232239	-0.015976	-0.398297	-0.159517	-0.276447	0.233069	0.0469475	0.0740065	-0.209259	0.0128737	-0.152871	-0.0762549	-0.186328	-0.0543256
CGAGAGCG	-0.00536996	-0.127901	-0.13279	-0.046623	0.480672	0.482038	-0.152288	-0.0950693	-0.212726	-0.0499576	-0.0544873	-0.199568	-0.0989513	-0.11152	-0.0377125	-0.120204	-0.0620227	-0.115864	-0.0960574	-0.00685574	-0.29431	-0.15391	-0.177728	-0.119791	-0.358838	-0.0987011	-0.203105	-0.172125	-0.148413	-0.0371842	-0.181816	-0.187943	-0.0370492	-0.104866	-0.132883	-0.103152	-0.198716	-0.141229	-0.141005	-0.236754	-0.03527	0.0170514	-0.00995236	-0.0672135	0.034343	-0.0808175	-0.0753696	0.111635	-0.216431
CGTCGGGA	-0.087142	-0.234679	0.00557551	-0.161261	0.480987	0.482456	0.003774	-0.253313	-0.147625	-0.14023	-0.0779581	-0.103668	-0.221753	0.120233	-0.00815382	-0.146852	-0.124109	0.0561431	0.000146717	-0.146597	-0.008828	-0.127984	-0.0117155	-0.201682	-0.0971986	-0.0270323	-0.214327	0.0400207	0.0633877	-0.179048	-0.0918804	-0.2	-0.0785201	-0.137161	-0.129499	-0.167985	0.132726	0.0631829	-0.158503	-0.136351	-0.0181066	-0.0831511	0.0627161	-0.112668	0.10047	-0.191364	-0.104431	-0.160555	-0.0410177
ACTCTCGG	-0.0290103	-0.043487	0.191252	0.0975609	0.48217	0.481787	0.280384	0.247336	0.2707	0.0789075	0.27119	0.013762	0.114349	-0.151713	0.227694	-0.0733324	0.142201	-0.0225867	0.165743	0.0991755	0.296872	0.255121	0.204179	0.130405	0.285119	0.154586	0.154117	0.290391	0.228964	0.132625	0.195624	0.122759	0.194557	-0.0302745	0.094168	-0.052566	0.190264	-0.073443	0.249489	-0.0748605	0.258706	-0.131069	0.223089	0.119	0.264722	0.105177	0.261713	-0.0553628	0.23807
CGAGACTA	-0.139147	0.104586	0.057579	0.0956634	0.482003	0.483717	-0.0728598	0.0860677	-0.0210295	0.109208	0.136341	0.103336	0.00756699	0.0746139	0.117804	0.182459	0.0326042	-0.0240713	0.0303738	0.113018	0.0805756	0.0575291	0.0434071	0.133851	0.0846923	-0.148812	0.0847195	0.0205302	0.144583	0.173773	0.150002	0.180374	0.153085	0.319505	0.00720351	0.213611	0.0896703	-0.0165784	0.112741	0.0958392	0.154095	0.109937	0.124697	0.0741142	0.180016	0.226701	0.126554	0.287608	0.251824
ATCGAGAA	0.0873095	0.0592176	0.155821	-0.0806825	0.482973	0.483295	-0.0815084	-0.0342883	-0.0944346	0.141862	0.0315594	0.0118417	-0.00766808	0.0174364	0.0274431	-0.0749083	0.186838	-0.0905068	0.156876	-0.0141948	-0.0985186	0.0936958	0.0670134	-0.092533	-0.0862883	-0.0296795	-0.0559177	-0.0680523	-0.0127708	-0.23536	-0.212321	-0.0671859	-0.0246548	-0.093799	-0.183863	-0.144129	-0.178252	-0.125414	-0.225885	-0.0745222	-0.118243	-0.22644	-0.148678	-0.0811409	-0.156543	-0.172125	0.0268615	0.00322867	-0.0388614
TCGAGACA	-0.0538287	-0.239362	-0.0500347	0.0353275	0.483031	0.483537	-0.22993	-0.158336	-0.251004	-0.120691	-0.191721	-0.257675	-0.121396	0.118568	0.111195	-0.0369143	-0.0802174	-0.221753	0.0638925	0.022621	-0.234872	-0.175203	-0.103905	-0.0948446	-0.172125	-0.0515297	-0.15376	-0.312033	-0.0718619	0.0114367	-0.209044	-0.18962	-0.103574	0.0446174	-0.0486455	-0.0515407	-0.0729233	-0.132975	-0.0388661	-0.143533	-0.103905	0.0562958	0.11549	-0.0418856	-0.0430041	-0.0295571	-0.0264834	0.110329	-0.269897
CTCGGGAA	0.037328	0.0163134	-0.154212	0.125358	0.482081	0.485173	-0.127654	0.137755	-0.0544663	0.126575	-0.0781872	0.0513881	-0.117198	-0.0263583	-0.0787567	0.0403092	-0.112843	0.0647233	0.0725312	0.150607	-0.0766986	0.0552133	0.0129592	0.0427716	-0.170333	-0.0200558	0.026172	-0.136754	-0.0922988	0.176917	-0.0331718	0.176489	-0.0254374	0.270773	0.027238	0.150758	-0.253462	0.152022	-0.132514	0.0312786	-0.0539341	0.25551	0.109532	-0.00793081	-0.126922	0.12599	-0.0893289	0.204955	-0.0400745
CATTCTCG	-0.0892193	-0.131605	0.0598402	-0.155752	0.483577	0.484695	-0.0808588	-0.197062	0.0246177	-0.0608731	0.0683934	-0.157675	-0.120901	-0.0930832	-0.0142938	-0.116178	0.0057679	-0.0973312	0.125531	-0.197881	-0.128988	-0.181248	0.0741757	-0.091705	-0.155596	0.110772	-0.12652	0.0504288	0.0144508	-0.187943	0.0510609	0.0653648	0.0266323	-0.0122771	-0.0417227	-0.100789	-0.0748281	-0.270774	-0.13439	0.0228934	0.0569878	-0.1767	-0.0323198	-0.0500932	-0.0547476	0.0478551	0.0888951	0.0162115	0.120855
ATCGAGAC	-0.0956909	0.0338712	-0.0309008	-0.105651	0.486456	0.484109	-0.102687	-0.146092	0.0634636	-0.200656	-0.176447	-0.184466	-0.0765242	-0.0384249	0.018092	-0.168825	0.0504507	-0.0315807	-0.0674078	-0.0132103	-0.110073	-0.243652	0.0193448	-0.128819	0.00642685	-0.0920283	-0.225026	-0.0733406	-0.176195	-0.0563383	0.0181653	0.0491	-0.0389969	-0.0869863	-0.00247061	-0.0825408	-0.0716161	-0.113371	-0.0215212	-0.109366	-0.173993	-0.167366	0.0366291	-0.246725	0.075929	-0.152143	-0.0438282	-0.00693316	-0.0426567
AGTCCCGA	-0.234969	-0.245842	-0.0888748	-0.0741554	0.486672	0.487125	-0.0771931	-0.2767	-0.0359591	-0.0280273	0.045718	-0.120761	-0.154821	-0.0498559	-0.0799215	-0.107935	-0.0489345	-0.244129	0.0309709	-0.145223	0.00726627	-0.213549	0.128869	-0.051926	0.00943411	-0.100524	-0.167985	-0.0428489	-0.0275096	-0.0587494	-0.0511076	-0.147886	-0.0487062	-0.0390162	-0.0139493	-0.261979	-0.173518	-0.0923174	-0.116304	-0.0507762	0.00538311	-0.199568	-0.103763	-0.116813	-0.0903726	-0.0621382	-0.0955339	-0.045728	0.0359938
AGTCGGGA	-0.0377994	-0.191364	-0.235952	-0.0452997	0.483865	0.487711	-0.129671	-0.204001	-0.111464	-0.159688	-0.0765007	0.141145	-0.149485	0.0649699	-0.0157552	-0.0097376	-0.107727	0.00122115	-0.17986	0.0163052	-0.23536	-0.0789363	-0.254363	-0.0540134	-0.147756	-0.0843896	-0.112494	-0.114086	-0.155284	0.00695919	-0.101011	0.0306016	-0.175696	-0.00430262	-0.268613	-0.0436657	-0.0638559	0.017967	-0.0152272	0.241715	-0.100568	-0.145469	0.0458227	-0.00842921	-0.0445211	0.0864481	-0.072623	0.00360429	0.0867534
GGTCGAGA	-0.00920638	-0.058854	-0.147625	-0.0694709	0.485586	0.489238	-0.203339	-0.0989441	-0.0493684	-0.115614	-0.284771	0.0461102	0.0301898	-0.0952122	-0.0102384	-0.0118754	0.0392422	0.133908	0.058944	-0.0828584	-0.212784	0.0670187	-0.0702693	0.0210756	-0.12644	0.201817	-0.0101652	-0.0938521	-0.138934	0.00153849	0.00199338	-0.00117533	-0.0485573	0.053162	-0.0348099	-0.0583702	-0.270115	-0.157675	0.00216126	0.0303169	-0.0438596	0.1456	0.137236	0.075689	0.0319095	-0.0226141	-0.0518923	0.00765796	0.0807187
ATTCGAGA	-0.161798	-0.159176	0.0367061	-0.171897	0.486728	0.490368	-0.0472047	-0.142022	-0.0201455	-0.0548372	0.00934588	-0.139041	0.0144828	-0.165561	-0.0804471	-0.215864	0.0703486	-0.205502	0.0219589	-0.0648523	-0.0512364	-0.177989	-0.0307506	-0.21209	0.053409	-0.305502	-0.280967	-0.0564157	-0.0503868	-0.227984	-0.213312	-0.0991715	-0.0111668	-0.366154	-0.231876	-0.174473	-0.163264	-0.224949	0.00218518	-0.243533	-0.207263	-0.20655	0.0540279	-0.11463	-0.022244	-0.269037	-0.0675837	-0.155129	0.0869947
GTCGAGAC	-0.00800787	0.0240483	-0.161979	0.0130112	0.486056	0.489688	-0.0769053	0.0291125	-0.258838	-0.00398004	-0.0552814	-0.128735	-0.317783	-0.00318889	-0.122403	-0.0360536	-0.122988	-0.0434632	-0.00556555	-0.00422615	-0.18729	0.00948528	-0.103012	0.00412738	-0.157349	0.0709994	0.0783432	-0.166154	-0.0779787	0.0312597	-0.25391	-0.0699668	-0.134486	-0.0323682	-0.235556	-0.0116732	-0.0514277	0.209923	-0.203339	-0.0718203	-0.161618	-0.0362511	-0.163827	-0.0514317	-0.188273	-0.0740203	-0.157025	-0.0127316	-0.205257
CACTCTCG	-0.192812	-0.135458	-0.268403	-0.209637	0.485134	0.489339	-0.306854	-0.103339	-0.241794	-0.073284	-0.18041	-0.179317	-0.203386	-0.0701241	-0.245469	-0.121753	-0.314086	-0.0746437	-0.337059	-0.109259	-0.267778	-0.0874681	-0.292812	-0.100261	-0.364016	-0.123062	-0.21152	-0.263827	-0.256864	-0.12652	-0.191364	-0.121968	-0.338195	-0.110958	-0.230803	0.0195715	-0.104721	0.172509	-0.209044	-0.0847693	-0.295861	-0.029807	-0.113194	-0.116304	-0.165758	-0.0582135	-0.258336	-0.19431	-0.298297
CGAGAGTC	-0.0967107	-0.0966918	-0.0915796	-0.235067	0.484412	0.489975	-0.331336	-0.203058	-0.282974	-0.163827	-0.227572	-0.0648583	-0.179048	-0.103152	-0.134969	-0.129757	-0.118977	-0.090421	-0.175696	-0.135458	-0.366354	-0.214267	-0.133913	-0.108355	-0.295078	-0.0798994	-0.282102	-0.268825	-0.172584	-0.168403	-0.227491	-0.106702	-0.259176	-0.0625754	-0.175203	-0.203198	-0.281531	-0.185699	-0.223732	-0.181248	-0.228735	-0.0396852	-0.042502	-0.0176527	-0.15784	-0.226122	-0.141005	-0.166959	-0.0906992
GTCTCGAA	-0.125259	-0.00966685	0.0357685	0.128702	0.482655	0.488784	-0.0329702	-0.02284	-0.162342	0.031078	-0.129757	-0.0206025	-0.098761	-0.0299537	-0.0784154	0.116844	0.00792135	0.125112	-0.116241	0.059502	-0.111014	-0.0456337	-0.103953	0.168081	-0.061509	0.0226635	0.0291169	-0.103245	0.0299101	0.146306	0.229914	0.0123211	0.0556714	0.170693	0.0638435	0.0151047	-0.129671	-0.0319512	-0.189963	0.103126	-0.137059	0.0663388	0.019827	0.153134	0.038329	0.0810512	-0.0588867	0.036338	0.213016
GTTCGAGA	0.0551426	-0.036979	0.0349562	0.0370709	0.480357	0.48764	0.11099	0.115458	-0.0511803	0.010001	0.0450887	0.0647785	0.137274	-0.0515871	0.0707641	0.0495896	0.0792413	0.126272	0.158158	-0.0291576	-0.167572	0.0661412	0.0109217	0.101944	0.00924139	0.0466186	0.000175794	-0.0724532	-0.084313	0.0565121	0.189235	0.0853704	0.172933	0.162734	0.145468	-0.0979278	0.0425764	-0.145842	0.011145	-0.0409934	0.101034	0.0907079	0.149176	-0.0197623	0.136428	-0.0153357	0.0539455	-0.0131971	0.170617
ATCTCGAA	-0.112726	-0.303339	-0.144491	-0.223958	0.478415	0.488625	-0.0626917	-0.451286	-0.277211	-0.165561	-0.263827	-0.238828	-0.133913	-0.127409	-0.0328064	-0.271444	-0.184164	-0.139686	-0.0811859	-0.156384	-0.180688	-0.264016	-0.144249	-0.240671	-0.0743383	-0.127737	-0.372125	-0.165365	-0.114935	-0.100218	-0.00942063	-0.219723	-0.150307	-0.292812	-0.241567	-0.319997	-0.18962	-0.216241	-0.239903	-0.295468	0.0141993	0.263779	0.0285966	-0.227409	-0.000955414	-0.231069	-0.00733808	-0.293181	-0.00689064
GCTCCCGA	-0.257512	-0.000219351	-0.155284	0.0981317	0.481504	0.489781	-0.218642	-0.0128072	-0.0542528	0.121304	-0.19393	0.0178403	-0.158838	0.15748	-0.195468	0.0953612	-0.0503033	0.222123	0.0203146	0.14197	-0.164975	0.0403507	-0.0374276	0.236301	-0.192082	0.0711752	0.00142071	-0.119179	-0.12644	0.112186	-0.0996531	0.0938024	0.0675175	0.159198	-0.0155558	0.0580928	-0.27986	-0.015385	0.0049656	0.118785	-0.109528	0.20805	-0.0631972	0.244107	-0.252578	0.113142	-0.145469	0.203289	-0.00188068
TTCGAGAA	-0.0908157	-0.0516002	-0.126201	0.159673	0.479781	0.490115	-0.0899502	0.00540873	0.00180623	0.142006	-0.151999	0.0551015	-0.192082	0.102627	-0.0465645	0.189501	0.0199028	0.147557	0.160306	0.138134	-0.116877	0.119351	-0.144129	0.287398	-0.0511477	0.00586784	0.101133	-0.0149764	-0.117587	0.0597228	-0.0945084	0.0044499	-0.0055248	0.0751021	-0.165956	0.0639301	-0.0958142	0.00840731	0.0071035	0.0443348	-0.0936689	0.0686168	-0.0805233	0.252078	-0.0512293	0.188446	-0.0442854	0.141033	0.00340699
TCGAGAAA	-0.00294221	0.113915	-0.25391	0.202871	0.481334	0.491641	-0.233913	0.132191	-0.0606959	0.0616637	-0.213966	0.207586	-0.169037	0.278298	-0.0995137	0.257561	-0.0366267	0.109092	-0.0830155	0.133583	-0.209474	0.147041	-0.28729	0.29606	-0.142136	0.0303895	0.189832	-0.0913897	-0.27122	0.136544	-0.270774	0.0559601	-0.123284	0.242039	-0.24698	0.105544	-0.207007	0.01525	-0.0478637	0.217545	-0.225806	0.217115	-0.201011	0.239154	-0.284466	0.197872	-0.108092	0.208256	-0.161979
GTCGAGAA	-0.161618	-0.152288	-0.225964	-0.197469	0.481303	0.492629	-0.174715	-0.0917182	-0.186646	-0.102549	-0.0442792	-0.0990643	-0.225727	0.218064	-0.236051	-0.0804062	-0.249757	0.0403716	-0.0912439	-0.138722	-0.280134	-0.0948246	-0.121183	-0.017084	-0.21549	0.0121235	-0.0876949	-0.249757	-0.26216	-0.0279534	-0.300966	-0.11798	-0.16968	-0.0382589	-0.200043	-0.0305769	-0.0605597	-0.0141103	-0.0968709	-0.103716	-0.0277786	0.0901472	-0.174715	-0.0798343	-0.189963	-0.151713	-0.242946	-0.0968939	-0.209745
CTTCGAGA	0.0694611	0.198726	-0.104001	0.0694903	0.484278	0.491065	-0.239577	0.0801723	-0.0357023	-0.0388787	-0.191721	0.0542923	-0.120204	0.0162798	-0.123284	0.0478782	-0.0282555	-0.0657431	-0.0895718	0.0864237	-0.15391	0.0435155	-0.212843	0.0729701	0.0385048	-0.108778	0.114368	-0.101368	-0.20942	-0.0169759	-0.189963	-0.197469	-0.0508792	0.0813462	-0.179048	-0.00278499	-0.236957	-0.114569	0.0634391	0.0221333	-0.173283	-0.035682	-0.0433908	0.113043	-0.0762828	0.0210731	-0.162342	0.0883748	-0.146218
TCTCGACA	-0.0205404	-0.0446702	-0.0836678	0.0367462	0.483811	0.492091	-0.145717	0.0123809	-0.225806	0.0236713	-0.28041	-0.023057	-0.247237	-0.10942	-0.0662423	0.036527	-0.0886133	0.1174	-0.151856	-0.0789205	-0.14828	0.0922991	-0.0501938	0.0569927	-0.127572	0.18223	0.0716978	-0.201773	-0.280688	0.154657	0.0148946	0.0192538	-0.203198	0.118483	-0.128651	0.151209	-0.248945	0.118727	-0.17986	0.172374	-0.0699964	0.185271	-0.102457	-0.0207263	0.0660139	0.0376139	-0.20575	-0.0260597	-0.0382928
CTCTCGAA	0.153203	0.0496216	-0.0983084	0.0888222	0.488552	0.493901	-0.114327	0.0540104	-0.136552	-0.0547648	-0.0311047	0.0599712	-0.0782695	0.117404	-0.0999705	0.00708927	-0.0755946	0.0175372	-0.0573754	0.0937385	-0.0954161	0.00353172	-0.170553	0.0898276	-0.181816	0.0511615	0.0221013	-0.168825	-0.129757	0.122213	-0.122257	0.0701161	-0.0517022	0.0224166	-0.242136	-0.173283	-0.0120714	0.0290835	-0.057459	0.0167316	-0.111919	0.00688187	-0.145717	0.0555301	-0.228483	0.0475441	-0.0485037	-0.000284743	-0.137263
ACTCCCGA	-0.212726	-0.275449	-0.0296234	-0.137263	0.489256	0.494535	-0.236351	-0.145469	-0.187615	-0.156067	-0.191009	-0.212033	-0.187615	-0.000916718	-0.152724	-0.0806544	-0.0326991	-0.220761	-0.14908	-0.137469	-0.313668	-0.079566	-0.139903	-0.0561549	-0.165365	0.00947656	-0.100966	-0.170115	-0.283565	-0.209909	-0.308991	-0.010708	-0.173049	-0.0113158	-0.0710391	-0.0733559	-0.184466	-0.142946	-0.201055	-0.00718224	-0.0663518	-0.142022	-0.186967	-0.161083	-0.155909	-0.0340549	-0.0752405	0.031052	-0.291009
ATTCCCGA	-0.143297	-0.133068	-0.110292	-0.203527	0.491834	0.494076	-0.250031	-0.33536	-0.073551	-0.0300655	0.0300702	-0.286646	-0.00956941	-0.0703831	0.00566046	-0.0467294	0.0703437	-0.160906	0.101944	-0.140671	-0.152433	-0.289963	-0.0175644	-0.0854142	-0.154668	-0.0725533	-0.303433	-0.134775	0.00384735	-0.00207021	0.0339489	0.21801	0.0409736	-0.0193149	0.0581323	-0.117849	-0.0780588	-0.328483	-0.15986	-0.0238653	-0.195078	0.0200878	0.290132	0.0920576	0.0249681	0.0744323	-0.000898536	0.00836663	0.137973
GGTCTCGA	-0.0665995	0.00500486	0.0911228	0.00831868	0.493863	0.495938	0.113752	0.0117487	0.277529	0.0559775	0.113211	-0.00174479	-0.0825388	-0.0524446	0.228505	0.00203828	0.0296336	0.148544	0.118535	0.0129575	0.00778887	0.120386	0.11941	0.0998707	0.149376	0.156516	0.117128	0.256176	0.146816	0.100799	0.211892	0.0718638	0.245699	0.204392	0.196449	0.0224035	0.0668708	0.0325408	0.171736	0.12436	0.186833	-0.0107492	0.0787348	0.140603	0.0485559	0.122174	0.131601	0.072211	0.242601
AATCTCGA	-0.199568	0.110451	-0.226761	0.15473	0.49443	0.497411	-0.071281	0.125141	0.132954	-0.11261	-0.111577	0.0648429	-0.181816	0.00878279	-0.0272394	0.127445	-0.117134	0.230249	-0.0396898	0.0864527	0.0319093	0.0621271	-0.0631085	0.183737	-0.0083505	0.192565	0.183559	-0.00148763	-0.0974113	-0.0875704	-0.147496	0.0547364	-0.0301318	0.142987	-0.0919608	0.116764	-0.224033	-0.140894	0.00277552	0.047441	-0.161979	0.218961	0.0358381	0.242829	-0.175696	0.0689507	-0.0966878	0.197191	0.0927884
ATTCTCGA	-0.214691	-0.136754	-0.00398895	-0.117718	0.495422	0.497188	-0.161618	-0.0460554	-0.00122247	-0.0111868	-0.204624	-0.0019231	-0.117914	-0.264016	-0.0799029	-0.172816	-0.187943	0.0272911	-0.145717	-0.0706489	-0.00106628	-0.128067	-0.0345372	-0.020695	0.00792424	0.0639941	-0.123657	0.0192105	-0.068188	-0.0965015	0.0985986	-0.111805	-0.0448851	-0.1	-0.14168	-0.091157	-0.191721	-0.20942	-0.0726832	-0.148149	-0.0298379	-0.0498913	0.0105976	-0.0202571	-0.00285613	-0.0502149	-0.0714751	-0.0999141	-0.0183011
AGTCTCGA	-0.0638027	-0.16038	-0.0348103	-0.0782474	0.495519	0.498005	-0.0994759	-0.0179532	0.0814796	0.118309	0.0542926	-0.0743326	-0.0994656	-0.103953	0.0493069	-0.0311683	-0.0344435	0.0369108	-0.052416	-0.105948	0.0233801	0.00326844	0.0414395	-0.0403672	-0.114267	0.111814	-0.0996776	-0.0663104	0.0652098	0.0468314	0.120406	0.0513376	0.0997761	0.00776498	-0.0782642	-0.0362934	-0.0234436	0.199803	-0.0355521	0.152218	0.115883	-0.047641	-0.0736674	0.00893267	-0.0126973	0.0425352	0.0291901	-0.151286	0.120276
ACTCTCGA	-0.138828	-0.147625	-0.0933954	0.0793023	0.496832	0.496955	0.00796912	-0.128904	0.0212908	-0.126122	-0.143533	-0.195861	-0.154212	-0.139903	0.0961723	-0.172816	-0.00575827	0.0152762	0.177476	0.00402739	-0.102919	-0.221325	-0.115366	-0.0565236	-0.0929297	-0.0334368	-0.0690804	0.0124589	0.0509372	0.00572259	-0.119723	-0.113847	0.09466	-0.125337	-0.0503312	-0.18041	-0.101773	-0.0706043	-0.104576	-0.201954	-0.182681	-0.11831	0.142177	0.132658	0.0487894	-0.11707	-0.16517	-0.0600818	-0.185387
CTCGAGAA	0.0641195	-0.139686	0.111374	-0.0580411	0.499719	0.49923	0.300793	-0.14168	0.253569	-0.15391	0.0335544	-0.12652	-0.144977	-0.231515	0.0645936	-0.188941	0.0832293	0.102449	0.215881	-0.0361523	0.171047	-0.0355379	5.65084e-05	-0.14045	0.100264	0.0700453	0.0775679	0.199608	0.16275	0.0846708	-0.309366	-0.121824	0.0744834	-0.031698	-0.102228	-0.105899	0.0409469	-0.148678	0.107449	-0.246218	0.0694255	-0.00774484	0.0335913	0.213259	0.00557471	-0.0537102	-0.0968567	-0.00528345	-0.181816
TCTCGAGA	-0.0248221	-0.0829331	-0.13019	-0.172816	0.497366	0.496688	-0.204915	-0.110127	-0.0761472	0.0335737	-0.00853776	-0.166555	-0.156543	-0.0879857	-0.101278	-0.158503	-0.00487922	0.052811	0.0319446	-0.0541695	-0.04629	-0.0681513	-0.105799	-0.125337	-0.18729	0.0355085	-0.126122	-0.130539	-0.0306686	-0.0560374	-0.0627843	-0.0374406	0.0354671	-0.0974756	-0.0762486	-0.134582	-0.198716	-0.291009	-0.148812	-0.0719704	-0.129499	0.00546648	-0.0308804	0.0985019	-0.168613	-0.0493004	-0.1057	0.0237483	-0.26517
CTCGAGAC	0.0583248	-0.157187	-0.0418936	-0.0977456	0.497202	0.496116	0.217991	-0.206854	-0.0974088	-0.151286	-0.0827482	-0.136856	-0.191009	-0.146725	-0.0251058	-0.139469	-0.0762806	-0.17122	0.0888248	-0.177989	-0.101682	-0.146852	-0.103198	-0.296257	-0.141567	-0.175449	-0.148413	-0.104769	0.0109333	0.0156948	-0.368825	-0.197062	-0.227327	-0.0296356	-0.166555	-0.186646	0.00592475	0.0226576	-0.185078	-0.176195	-0.118509	-0.0454101	-0.156864	-0.0220184	-0.221896	-0.101909	-0.226281	-0.187943	-0.261083
CTCGAGAG	-0.0321877	-0.1451	0.0680294	-0.0621433	0.497406	0.495197	0.164068	-0.24168	0.274194	-0.131966	0.0347923	-0.14908	0.0049776	-0.286967	0.105384	-0.161798	0.0154566	0.0698396	0.103942	0.0232812	0.0820511	-0.158838	-0.0264516	-0.168613	0.0289728	0.0638488	-0.0105847	0.223518	0.180348	0.0438078	0.0146141	-0.10804	0.12101	-0.0531053	0.154461	-0.120204	-0.0275698	-0.0647389	0.157868	-0.118977	0.254212	-0.0585413	0.153838	0.119764	0.055041	-0.0569578	0.125447	-0.029501	0.0828897
ATCTCGAG	-0.210568	-0.035697	-0.0935726	-0.0795902	0.495807	0.493729	-0.193554	-0.101592	0.00803122	-0.0206275	-0.083513	-0.230892	-0.228233	-0.142713	-0.0232251	-0.0667438	-0.131158	0.153048	-0.102687	-0.0359142	-0.167985	-0.160206	-0.0891303	-0.130103	-0.06483	0.017741	-0.14034	-0.0113932	-0.00334809	-0.0517204	-0.18041	-0.150307	-0.0388797	-0.175945	-0.190658	-0.140671	-0.147886	-0.190658	0.0555747	-0.0469123	-0.0817046	-0.0837009	0.0520799	0.0253052	-0.13536	-0.154821	-0.0700347	-0.192445	-0.0241976
ACTCGAGA	0.00081533	-0.0625881	-0.0794144	-0.0170229	0.494061	0.495541	-0.0733961	-0.164782	-0.154821	-0.173049	-0.238405	-0.105998	-0.212436	-0.186646	-0.0913793	-0.182102	-0.0870574	-0.131966	-0.116558	-0.10048	-0.249349	-0.186967	-0.226841	-0.14437	-0.153313	-0.174232	-0.0788444	-0.0895213	-0.138934	0.103968	-0.0720789	-0.13851	-0.197881	0.0305468	-0.0417221	-0.0219709	-0.104048	-0.121681	-0.062206	-0.0470212	0.0806603	0.174567	-0.0132311	-0.0335559	0.110968	0.00727923	-0.192445	-0.0406375	-0.0502915
GCTCTCGA	0.0373555	-0.096431	0.0642819	-0.0794284	0.493914	0.492875	0.0841241	-0.227737	0.0783745	-0.130715	-0.0501452	-0.175696	-0.019623	-0.0811102	0.102341	-0.123958	0.0265651	-0.0203066	0.085285	0.0210983	0.0161994	-0.17167	-0.0599001	-0.139469	-0.0958852	-0.105306	-0.186967	0.0755094	0.13738	0.039869	0.156752	0.0400708	0.145006	-0.0520262	0.165635	-0.0991634	-0.0122836	0.0306095	-0.0342254	-0.0553542	0.066459	0.00535908	0.138535	0.105252	0.0636766	-0.0627793	0.0193348	0.020484	-0.0793865
CCTCGAGA	0.0872645	-0.125026	-0.0233176	-0.143652	0.496047	0.491222	-0.0400802	-0.227654	0.0748706	-0.191721	-0.0578403	-0.113787	0.196926	-0.23363	-0.0267317	-0.175449	-0.0759698	0.00462668	0.0681832	-0.2	-0.101323	-0.266959	-0.100745	-0.246218	-0.134199	-0.0574169	-0.135853	0.0402378	0.207587	-0.153313	0.137326	-0.0240619	0.212155	0.112713	0.0939111	-0.143415	-0.0224411	-0.04845	0.133109	-0.0500863	0.243538	0.13922	0.222656	-0.0610834	0.181452	-0.0772743	0.220008	-0.124033	0.254084
GATCTCGA	0.0304161	-0.141794	-0.170997	0.0359348	0.492491	0.49151	-0.147237	-0.1383	-0.073378	-0.0105778	-0.177989	-0.0357686	-0.0426642	-0.110347	-0.0391503	-0.123284	-0.0411849	-0.134679	0.00837197	-0.13019	-0.225259	-0.233819	-0.110846	-0.117393	-0.202319	-0.0865157	-0.0687969	-0.0971388	-0.0872675	0.0347929	-0.169897	-0.168613	-0.0986388	0.000745289	0.0558829	-0.216749	-0.201323	-0.0153712	-0.264207	-0.0992278	-0.00389555	-0.120901	0.0209652	-0.0167127	-0.114569	-0.0534574	-0.099987	-0.0818459	-0.241908
GCTCGAGA	-0.102411	0.0995148	-0.106753	0.126006	0.490902	0.491905	-0.296658	0.0631165	-0.218177	-0.0185605	-0.0856093	0.120885	-0.115304	0.100312	-0.181816	0.149954	0.0490473	0.055071	-0.0910317	0.0521668	-0.191721	0.040514	-0.164207	0.0727123	-0.182681	-0.0891841	0.00611915	-0.197062	-0.0582535	0.34916	-0.114146	0.115946	0.199437	0.32522	-0.16073	0.0468976	-0.297469	0.00300582	-0.132239	0.155433	-0.144009	0.0494167	-0.125181	0.143315	-0.182102	0.11458	-0.256384	0.179851	-0.058052
GTTCTCGA	-0.00579885	-0.2007	0.0621381	-0.19393	0.491416	0.48986	-0.0841101	-0.192082	0.161291	-0.160033	0.0632869	-0.120551	-0.148413	-0.115243	0.0528437	-0.206449	-0.0659409	-0.0373294	0.038978	-0.186646	0.00544679	-0.0373466	0.0438786	-0.208991	0.0215354	-0.0234379	-0.154212	0.153437	0.00482254	-0.151713	0.0584038	0.0119858	0.068735	-0.0115628	-0.0100735	-0.101773	-0.00477409	-0.00969643	0.149523	0.181144	0.188845	-0.170774	0.170353	-0.0703736	0.120262	-0.0413371	0.14217	-0.11986	0.163013
ATCTCGAC	-0.257349	-0.227246	-0.32993	-0.080994	0.490158	0.490118	-0.319928	-0.129671	-0.149757	0.0961849	-0.158503	-0.196257	-0.379048	-0.225571	-0.303292	-0.17986	-0.0980111	-0.0447984	-0.261798	-0.0250228	-0.225806	-0.0659494	-0.261439	-0.0972447	-0.231426	-0.113906	-0.209691	-0.214874	-0.261979	-0.0689271	-0.338405	-0.0643689	-0.212263	-0.180967	-0.244855	-0.215181	-0.318509	-0.243415	-0.099604	-0.159517	-0.113966	-0.116877	-0.22815	0.00548309	-0.320343	-0.154516	-0.321896	-0.0697325	-0.123732
CGTCGAGA	-0.15391	-0.276195	0.16955	-0.0335433	0.490064	0.48983	-0.0940365	-0.205998	0.00982653	-0.0490186	0.0451894	-0.119314	0.0576275	0.0115148	0.0763479	-0.0985841	-0.00336301	-0.120971	0.181819	-0.120621	0.101865	-0.033212	0.154163	-0.00673482	0.0344004	-0.201323	-0.117522	0.103777	0.123481	-0.102641	-0.048878	0.118308	0.15496	-0.0469287	-0.166354	-0.117783	0.0202977	-0.132883	0.111905	-0.152288	0.00275694	-0.0622284	0.0336506	0.0339154	0.0716426	-0.0358404	0.163008	-0.140121	0.0739835
AGTCGAGA	-0.22204	-0.182681	-0.304431	0.03481	0.489138	0.490368	-0.429073	-0.25544	-0.333068	0.0128954	-0.267778	-0.0442186	-0.285387	-0.15544	-0.275203	-0.0177333	-0.220412	-0.114146	-0.288606	0.106723	-0.280688	-0.182681	-0.309691	0.0236645	-0.232239	-0.212378	-0.102045	-0.253611	-0.204721	0.0704187	-0.244612	-0.0922541	-0.206905	-0.0697258	-0.355284	-0.148017	-0.28962	-0.15544	-0.01389	-0.0941806	-0.178781	-0.201592	-0.225885	-0.0349212	-0.17167	-0.000938547	-0.278252	-0.0189247	-0.266154
CTCTCGAC	-0.0556945	-0.159517	0.00840638	-0.03679	0.487819	0.487382	0.189344	0.0145448	0.226603	0.111023	0.0989883	-0.11707	-0.0291447	-0.072621	0.0908425	-0.0473076	-0.0645191	0.0630502	0.0792238	-0.085161	0.224511	0.0715191	-0.0178675	-0.120412	-0.000370071	0.0924965	-0.0448939	0.104482	0.260379	0.109541	0.0888966	-0.12426	0.141068	-0.044518	-0.18962	-0.134679	0.337598	0.133068	0.132271	-0.112436	0.211078	-0.237059	0.0909622	0.0024383	0.212508	0.0690218	0.0455311	-0.00169048	0.158626
CGAGAGTA	0.106572	-0.150307	0.0142029	-0.0790228	0.48913	0.487574	0.0613161	-0.0624938	-0.0134177	0.0266513	0.0157361	-0.0815002	0.142501	-0.250585	0.162141	-0.0657354	0.0939631	-0.0265498	0.145225	-0.18729	-0.0929541	-0.180688	0.00765778	-0.0322229	0.0571439	-0.0971331	-0.0554074	0.131863	-0.0206957	-0.0345367	0.126035	-0.0698527	0.105465	0.043023	-0.0953587	-0.0773844	-0.0403772	-0.148545	-0.0590997	0.0547597	0.00918962	-0.0489421	0.0568213	-0.00582615	0.00840924	-0.0601081	-0.00996667	0.0880535	0.0953971
AATCCCGA	0.0839752	-0.121254	-0.119044	0.0222081	0.490649	0.485978	-0.0371611	-0.284466	-0.22204	-0.0899319	-0.00750749	-0.105552	-0.0115543	0.0550056	0.0111304	0.0894397	0.116484	-0.189279	0.0700715	-0.0654083	-0.281816	-0.24698	-0.156703	-0.0966331	-0.240012	-0.188273	-0.132057	-0.135262	-0.246597	-0.0908966	-0.231966	-0.184771	-0.224413	0.0862827	-0.0577269	-0.00258744	-0.159176	-0.210403	-0.134679	-0.0176093	0.0105381	-0.042588	-0.080924	0.00689206	-0.0399987	0.0262011	-0.0699729	0.0152151	-0.203668
TCCCGAGA	-0.191721	-0.108092	0.031763	-0.0760145	0.491326	0.486091	-0.093985	-0.0378757	0.0439611	-0.0360524	-0.0183648	-0.23363	0.0411929	-0.0885606	0.00767602	-0.225493	-0.0378451	-0.30655	-0.112552	-0.120831	-0.208778	-0.137469	-0.0356191	-0.0768416	-0.205948	-0.0844713	-0.1057	-0.031486	-0.0251401	0.0524559	0.245036	0.126319	0.293332	0.300221	0.315018	0.111682	-0.125806	-0.230627	0.127876	-0.171897	0.0372977	0.331299	-0.0253492	-0.0969578	0.0143213	-0.0430593	0.11628	0.0408046	0.317494
GATCCCGA	-0.0576035	-0.0490214	-0.0968891	-0.110127	0.488092	0.484679	-0.0366642	-0.198297	0.00459485	-0.0528967	0.00554976	0.0343421	-0.0758205	0.0496677	-0.0247352	-0.191364	-0.168825	-0.0483518	-0.0317444	-0.150585	0.0891312	-0.198297	-0.0425099	-0.0691899	-0.0823961	-0.122548	-0.116941	0.0391932	0.140062	0.161156	0.201046	0.190885	0.210015	0.183432	0.0352495	0.0769556	0.00214287	-0.179588	0.0699549	-0.0686945	0.175051	0.0135952	0.075487	-0.00475311	0.217045	0.138652	0.0581703	0.207065	0.277302
GATCGAGA	0.109516	-0.164782	-0.00708039	-0.101412	0.488463	0.482324	0.0646043	-0.0957842	-0.0773903	-0.0354543	0.0817428	-0.214997	0.000387309	-0.254212	-0.0448484	-0.071704	-0.0158498	-0.270997	-0.0264843	-0.177211	-0.145717	-0.186328	-0.0604747	-0.18041	-0.0796853	-0.144977	-0.129414	-0.0550384	-0.0631583	-0.0378279	0.0929847	-0.0578424	0.0884049	0.0514685	0.148968	-0.106449	-0.242946	-0.307988	0.00441327	-0.0942224	0.0134424	-0.0182413	-0.0539437	-0.164016	-0.00632963	0.0262606	-0.00542567	-0.0858625	0.100502
ATCCCGAC	-0.0480186	-0.0849597	0.162558	0.0467058	0.486441	0.481704	-0.147886	0.0549141	0.167409	0.079998	0.177068	-0.0710879	0.0384408	0.00330802	0.237435	0.0736362	0.0976993	-0.111238	0.206463	0.0831999	0.0474785	0.0220025	0.163447	0.103738	0.035927	-0.0675584	0.0675301	0.227768	0.230777	-0.117134	0.154545	-0.0109323	0.166571	0.108877	0.0314847	0.0266863	0.00486923	-0.129414	0.141269	-0.0218688	0.215244	-0.0738454	0.122938	0.00174482	0.120194	0.113034	0.265884	0.0863859	0.225559
AATCGAGA	-0.0573484	-0.153462	-0.0472031	-0.125806	0.488383	0.47706	0.0133216	-0.127654	0.170133	-0.0327546	0.15924	-0.0944408	-0.108513	-0.0817662	-0.00216565	-0.0253024	-0.092746	0.0738655	-0.105355	-0.166959	0.0446435	-0.103574	0.0192062	-0.149894	0.0471836	-0.0698315	-0.0478559	0.160847	0.238982	-0.114086	0.178956	-0.0226459	0.21353	0.0755052	0.0700386	-0.0845363	0.137371	0.0126899	0.267812	-0.0551906	0.118884	0.0119459	0.0184806	-0.09494	0.0920294	0.0226693	0.135313	0.0208045	0.261456
ATCGAGAT	-0.0177031	-0.220551	-0.0038503	-0.0954309	0.486806	0.480724	0.108306	-0.218776	-0.139469	-0.0351314	-0.0513836	-0.0478078	0.0528653	-0.124413	0.00979712	-0.112263	-0.0295811	-0.161261	0.1483	-0.00500779	-0.116178	-0.294692	-0.0637365	-0.118442	-0.172584	-0.0730594	-0.183863	-0.00812611	-0.191009	-0.132975	-0.0140173	-0.109366	-0.120831	-0.079648	-0.0601248	-0.0432692	-0.0918671	-0.19431	-0.0934854	0.0594381	-0.0789888	0.0287406	-0.0789582	-0.197881	-0.0720365	-0.0782716	-0.132422	0.00371459	0.014215
ATCCCGAG	0.0648472	-0.234294	-0.124185	-0.207831	0.484933	0.482967	-0.0498254	-0.232514	-0.136856	-0.20348	-0.161083	-0.280688	-0.109691	-0.0524031	-0.0882457	-0.110073	-0.156864	-0.302641	-0.0622328	-0.116941	-0.272816	-0.333442	-0.119044	-0.29393	-0.282974	-0.31152	-0.297881	-0.141341	-0.132422	-0.108355	-0.173993	-0.182974	0.0486975	0.0677742	-0.0248722	-0.0783607	-0.197881	-0.267778	-0.184771	-0.259007	-0.113906	-0.0463534	-0.0186849	-0.200966	-0.166555	-0.20348	-0.0585735	-0.108884	-0.177989
GTTCCCGA	-0.00104123	-0.0671044	-0.000977928	0.0575887	0.483241	0.482607	0.0475043	-0.102319	0.22111	-0.0702671	0.027057	-0.100966	-0.0446055	0.00873853	0.100401	-0.132975	-0.0439252	-0.107676	0.0200042	0.0113201	0.0271662	-0.131605	-0.0221003	0.0403702	-0.0442937	-0.193181	-0.0247401	0.16779	0.0781156	0.0200761	0.129846	-0.0918581	-0.00127329	-0.0210001	-0.0441845	0.137566	-0.00153638	-0.049934	0.114465	0.0574768	0.188451	-0.0378278	0.0444836	0.0291227	0.152899	0.0911583	0.0911539	0.0304897	0.128899
ATCGAGAG	-0.0596813	0.100061	0.0859186	0.0453649	0.485084	0.478382	0.0930425	-0.0384742	0.193845	-0.013479	0.177814	-0.0345329	-0.0815897	-0.000605834	0.0182018	0.0921506	-0.0636373	0.0483707	-0.0537986	0.00360437	-0.060084	-0.0771156	0.0525018	0.0106112	-0.053556	-0.166354	0.0311232	0.0992219	0.159222	0.038576	0.0785435	-0.0148693	0.0336511	0.161656	-0.0335985	0.0602923	0.135707	0.117524	0.203723	0.119549	0.190453	-0.0555737	0.0471238	0.0386704	0.0562871	0.137639	0.129103	0.120702	0.18902
CATCGAGA	0.0311066	-0.321968	0.144966	-0.0247293	0.487299	0.471386	0.115459	-0.337572	0.0394414	-0.0170811	0.128141	-0.398297	0.0144401	0.0604325	0.245119	-0.0570067	0.15384	-0.147886	0.166705	0.0288695	0.110851	-0.286646	-0.00422941	-0.257025	-0.0543218	-0.337986	-0.374232	-0.0699372	-0.0453451	-0.215428	-0.332975	-0.208778	-0.278781	-0.246471	-0.27986	-0.109909	0.0117766	-0.190309	-0.142829	-0.35817	-0.0946096	-0.0904984	0.0782378	-0.123882	-0.149214	-0.16073	0.0171533	-0.0032724	-0.268194
TCCCGGGA	-0.241117	-0.112901	-0.0866809	-0.0458644	0.482377	0.474122	-0.0215389	-0.110292	-0.183863	-0.232698	-0.159176	-0.0686852	-0.141229	0.169781	0.0502643	0.00744397	-0.119654	-0.205208	0.0600402	0.0754478	-0.269037	-0.0533855	-0.141229	0.036265	-0.212148	0.0291366	-0.0797272	-0.154975	-0.138405	-0.00563907	-0.0398382	-0.056632	-0.141794	-0.114569	-0.0101499	0.00371742	-0.148678	0.0974359	-0.0866445	-0.0587988	-0.00754509	-0.0321204	0.00753926	-0.0196537	-0.125727	-0.086454	-0.0358349	-0.0502335	-0.0874047
ACTCGGGA	-0.0692876	-0.302091	0.147771	-0.160555	0.48137	0.475634	0.130893	-0.134969	0.120217	-0.102045	0.159167	-0.0737741	-0.210073	-0.125649	0.0820997	-0.229243	0.0326584	0.144389	0.0440224	-0.115802	0.129249	-0.0720789	0.148781	-0.226043	0.062357	0.0321663	-0.148678	-0.00662395	0.0182908	-0.179588	-0.0410801	0.00369154	-0.00854363	-0.197062	-0.1284	-0.219111	0.0714342	-0.118709	0.123522	-0.0313889	0.149173	-0.221183	0.037362	-0.0159806	0.137449	-0.195078	0.0310482	-0.116241	0.0850105
TATCTCGA	-0.152288	-0.207469	-0.0687892	-0.172354	0.481692	0.477357	-0.184164	-0.231785	-0.318709	-0.0800415	-0.273993	-0.163264	-0.202965	-0.0422985	-0.241908	-0.164397	-0.195078	-0.189279	-0.203905	0.138339	-0.221467	-0.285699	-0.175449	-0.245469	-0.238405	-0.154363	-0.24828	-0.275449	-0.252143	-0.200524	-0.173049	-0.204096	-0.195078	-0.148812	-0.193554	-0.208619	-0.275945	-0.113608	-0.298297	-0.234486	-0.254212	-0.0575803	-0.0879485	-0.139577	-0.272816	-0.171897	-0.182391	-0.115739	-0.24023
CCTCGGGA	-0.0396276	-0.170997	-0.0857567	-0.162893	0.481212	0.478166	-0.0690327	-0.272584	0.0116612	-0.152724	-0.159688	-0.130892	-0.220135	-0.157025	-0.182102	-0.124949	-0.205453	0.0357921	-0.149214	-0.23019	-0.129243	-0.297062	-0.0594447	-0.106651	-0.00722063	-0.0567398	-0.161979	-0.0650305	-0.211919	-0.216178	-0.0965035	-0.178781	-0.211238	-0.234486	-0.350169	-0.290658	-0.119654	-0.13439	-0.0128428	-0.224109	-0.116685	-0.152288	-0.100043	-0.0104887	-0.195468	-0.209583	-0.158004	-0.0828051	-0.0817009
CGAGACTC	-0.0703743	-0.095388	-0.234582	-0.0255403	0.480316	0.479992	-0.0997324	-0.170553	-0.205012	-0.133068	-0.15391	-0.212552	-0.100966	-0.0869901	-0.166354	-0.152288	-0.22161	-0.226201	-0.263639	-0.144491	-0.191009	-0.0950445	-0.20048	-0.137675	-0.256543	-0.137059	-0.200305	-0.34389	-0.0992265	-0.0255619	0.086955	0.16206	-0.0235582	-0.194692	-0.0898979	-0.158336	-0.127246	-0.208991	-0.137986	-0.152288	-0.227737	-0.115614	0.119722	0.0548008	-0.150169	-0.0117386	-0.0624605	0.0201212	0.129436
GGTCCCGA	0.141205	-0.0171221	0.0574418	-0.046135	0.480465	0.476884	-0.0778549	-0.133724	-0.0565281	0.107799	-0.212148	-0.122257	0.043626	-0.170774	0.0613629	-0.175449	0.0362303	-0.116749	0.00492886	-0.0130458	-0.314752	-0.0923505	-0.0292366	0.00120075	-0.16968	0.0351983	-0.110182	-0.0625802	-0.216558	-0.108725	-0.013764	-0.0776102	-0.105404	-0.161979	-0.0803976	-0.199568	-0.0913003	-0.158004	-0.027012	-0.0989141	0.0373415	-0.0759069	0.0239827	0.0129161	-0.0291884	-0.141341	-0.053433	-0.176955	-0.124872
ATTCGGGA	0.16088	-0.15867	0.174252	-0.146597	0.480322	0.474615	0.0570988	-0.0353438	0.0695928	0.0222497	0.180851	-0.098083	0.035162	-0.173755	0.198153	-0.0502429	0.0623687	0.0902078	0.207482	-0.114388	0.167599	0.0508052	0.138948	-0.00779241	0.0260689	0.13921	0.060531	0.0642752	0.114627	0.0567466	0.108324	-0.0144645	0.121753	0.0859802	0.251004	-0.0934764	0.130139	-0.0271659	-0.0957031	-0.00297178	0.053839	-0.153611	0.181268	0.0669581	-0.00983603	0.0159189	0.12043	-0.0660044	-0.0705364
CAATCTCG	0.184429	-0.189279	-0.0413385	-0.187615	0.479332	0.474396	0.0656372	-0.224565	-0.0354379	-0.177989	-0.0446544	-0.134775	-0.0557719	-0.132606	-0.0670226	-0.211351	-0.0314963	-0.286967	-0.0662361	-0.0903545	0.00341233	-0.2	0.031546	-0.236251	-0.0898222	-0.173049	-0.191364	0.0580476	0.0835259	0.0324392	-0.19393	-0.13363	-0.106248	-0.284771	-0.0219981	-0.235655	0.0467819	0.193932	-0.213727	-0.184771	-0.0930295	-0.0244614	0.115804	-0.198297	-0.0968192	-0.2284	-0.0197565	-0.10655	-0.14389
CACTCCCG	-0.146725	0.0361738	-0.163639	-0.138091	0.477098	0.474714	-0.0331387	0.045191	-0.0775048	0.144064	0.0277068	-0.197469	-0.162525	-0.0710741	-0.181816	-0.0928409	-0.168825	-0.0418509	-0.0347448	-0.112668	0.0275675	0.0781049	-0.190658	-0.0790464	-0.162709	-0.0119802	0.053844	-0.111014	0.120907	-0.0344898	-0.200218	-0.195078	-0.0388931	-0.0674702	-0.331515	-0.0254464	0.178339	0.131066	0.0149956	-0.115739	-0.168194	-0.178516	-0.120482	0.0219858	-0.09672	-0.18041	-0.170997	-0.0884503	-0.18962
ACGAGAGT	-0.127165	0.0374428	-0.136552	0.0769369	0.476941	0.473237	-0.280134	-0.0602225	-0.0896788	-0.0572837	-0.0231319	-0.111862	-0.114327	0.0207415	-0.193181	-0.0862522	0.0935651	-0.118243	0.0122005	-0.124109	-0.298716	-0.242597	-0.0639632	-0.0445412	-0.117393	0.127318	-0.126281	-0.192812	-0.204866	-0.134486	-0.0880121	-0.0368926	-0.119044	-0.150031	0.0326904	-0.22161	-0.259346	-0.0353334	-0.0301957	0.0742565	-0.140561	-0.211976	-0.0687655	-0.101144	0.0290935	-0.0886973	-0.124872	0.0457731	0.00292153
GTCCCGAC	0.124115	-0.157025	-0.0323693	-0.0958797	0.475898	0.472746	-0.0302629	-0.266959	-0.218442	-0.104915	-0.162525	-0.175449	-0.00800787	-0.180967	0.0086896	-0.190658	-0.00405298	-0.260555	-0.0881623	-0.116877	-0.216813	-0.24023	-0.0461446	-0.132331	-0.189963	-0.119044	-0.27167	-0.175449	-0.0371378	0.198811	0.00305321	0.0315018	0.136061	0.0180191	0.00201673	-0.10348	-0.157187	-0.209474	-0.137469	-0.22161	-0.0831895	0.0141578	0.294482	0.0609547	0.156028	-0.0478696	0.00562342	-0.0541601	0.0576506
CGAGACCG	-0.0576959	-0.11549	-0.147496	-0.054896	0.475332	0.469515	-0.223807	-0.216368	-0.344491	-0.18729	-0.322988	-0.195468	-0.144249	0.103355	-0.145967	-0.0547023	-0.165956	-0.194692	-0.204431	-0.0616457	-0.297062	-0.0801406	-0.153462	-0.0775643	-0.311464	-0.221538	-0.0624441	-0.31831	-0.294692	-0.118575	0.00277108	0.00656141	-0.286328	-0.180134	-0.00244423	-0.0909386	-0.298297	-0.0651076	-0.363451	-0.123582	-0.128988	-0.280134	-0.14023	-0.0240439	-0.202411	-0.0768569	-0.18962	-0.0171305	-0.114691
CTCGGGAC	-0.087061	0.100856	-0.110624	-0.15986	0.473897	0.470847	-0.0478591	-0.0653655	-0.0689513	-0.177469	-0.0680215	-0.126841	-0.0993213	-0.30846	-0.00813679	-0.0460302	-0.100393	0.0040698	-0.155752	-0.079939	-0.13098	-0.221824	-0.0719169	-0.148413	-0.120621	-0.0438249	-0.0712707	-0.0566488	0.108898	0.136929	-0.224413	-0.011194	0.117452	0.134391	-0.057137	-0.0654199	-0.0590439	-0.136151	-0.0652943	-0.102182	0.00728966	0.139125	0.134756	0.0201363	0.0821193	-0.0162408	0.0171122	-0.105453	-0.0943789
CGAGATCG	0.205764	0.0864536	-0.0071121	0.217029	0.4758	0.473051	-0.227084	-0.0203641	-0.134294	0.0432294	-0.0994451	-0.00554759	-0.0416865	0.0945205	-0.10381	0.145855	-0.0117371	-0.100305	-0.0794254	0.141426	-0.365758	0.0758935	-0.177469	0.0945877	-0.193181	0.0294161	-0.090404	-0.200043	-0.347756	0.027528	-0.0679463	-0.0630832	-0.133724	0.0875678	-0.0940618	-0.0517301	-0.402503	0.126515	-0.199568	0.0092922	-0.145346	-0.00155051	-0.182102	-0.00168638	-0.100174	0.00918515	-0.0956268	0.147089	-0.15157
TCCCGACA	0.0107182	-0.242829	-0.230277	-0.17167	0.474491	0.475496	-0.21107	-0.229499	-0.187615	-0.0595774	-0.11261	-0.142136	-0.0601744	-0.319044	-0.0362945	-0.176195	-0.0312263	-0.175696	-0.097574	-0.300966	-0.25986	-0.303858	-0.132698	-0.215552	-0.180967	-0.24045	-0.20575	-0.143652	-0.189963	-0.269897	-0.197469	-0.246344	-0.136251	-0.191009	-0.124565	-0.244491	-0.131426	-0.342481	-0.130103	-0.236452	-0.253611	0.0305138	-0.133913	-0.239254	-0.130715	-0.225649	-0.173993	-0.158336	-0.0588491
CGAGAATC	0.0416891	-0.20846	-0.017388	-0.22636	0.473083	0.475276	0.028046	-0.182391	0.0235767	-0.0805605	-0.169897	-0.264207	-0.115243	-0.18041	-0.0124223	-0.215366	-0.0327391	-0.311634	-0.0995068	-0.111351	0.0632963	-0.299568	-0.0252194	-0.241005	0.0590117	-0.197469	-0.296257	-0.0394603	-0.100087	-0.167366	-0.0851715	-0.114509	-0.115366	-0.163078	-0.110958	-0.18729	0.063253	-0.15986	-0.114569	-0.254061	0.0233169	-0.0529626	-0.186646	-0.263451	-0.0915917	-0.0690704	0.0114825	-0.0772759	-0.123433
CTTCGGGA	0.0400704	-0.200789	0.00980734	0.114517	0.472609	0.474522	-0.132057	-0.0670616	-0.00302371	0.110889	0.0143277	-0.0614101	0.0142167	0.0426971	-0.0804319	-0.0417942	0.117267	-0.0833718	-0.111295	0.0244544	-0.175945	0.0613707	-0.0112661	0.0698616	-0.225026	0.0854011	0.0271027	-0.130016	-0.103716	-0.117457	-0.122915	0.14623	0.0388308	0.0211393	-0.0762361	0.0225129	-0.0736059	-0.0870816	-0.0844385	-0.0225295	-0.0775669	0.0234363	-0.00585651	0.102468	0.00698837	0.0563843	0.0538294	0.0484643	-0.120135
AATTCCCG	0.173965	-0.324949	-0.0843115	-0.270774	0.473254	0.471967	0.0113929	-0.203292	-0.038935	-0.258838	0.0572735	-0.198297	0.0784021	-0.15376	-0.0925718	-0.300043	0.066459	-0.139794	0.0482538	-0.202733	-0.0719169	-0.463078	-0.0677477	-0.274473	-0.0825908	-0.308355	-0.249214	-0.0120093	0.0355562	-0.277469	0.0350985	-0.265365	0.228232	-0.165365	0.133845	-0.308938	-0.0674312	-0.141794	0.0981381	-0.267985	0.0276571	-0.129585	0.152866	-0.139903	0.0529841	-0.251004	0.0929869	-0.148812	0.17211
AGATCTCG	-0.0996221	-0.210127	-0.248017	-0.282681	0.47177	0.473663	-0.177211	-0.178252	-0.170115	-0.249349	-0.0146523	-0.236957	-0.317849	-0.195078	-0.298297	-0.311862	-0.149894	-0.0923167	-0.130892	-0.201278	-0.291009	-0.328651	-0.230892	-0.270115	-0.322403	-0.18041	-0.303012	-0.17167	-0.121968	-0.203152	-0.35817	-0.257675	-0.146471	-0.272584	-0.223062	-0.211351	-0.236552	-0.277211	-0.0573604	-0.210902	-0.151145	-0.105552	-0.264782	-0.0651574	-0.25544	-0.281531	-0.179317	-0.191364	-0.225649
CGTCTCGA	0.0861454	0.039067	-0.0329429	-0.0596442	0.471454	0.473521	-0.0584933	-0.161083	-0.136151	-0.188273	-0.0543837	-0.0723012	-0.0665973	-0.0833718	0.022193	-0.198716	-0.170997	-0.0077681	0.159914	-0.0554053	-0.189963	-0.123136	-0.201547	-0.0484202	-0.192812	-0.120691	-0.167572	-0.119246	-0.00416531	0.146725	0.065463	0.0182224	0.0805172	0.0204103	0.0412479	0.112259	0.0317907	-0.136151	0.0542251	-0.210018	0.357304	0.438715	0.0756762	-0.0359246	0.195157	0.0301207	0.0784393	-0.0484579	0.236011
CGAGAGCA	0.0874295	-0.175203	-0.149349	0.0294161	0.470535	0.474329	-0.197469	-0.0802595	-0.00960781	0.004932	-0.116685	-0.0969704	-0.0623425	0.0232171	-0.135655	0.0638691	-0.100789	0.0304302	-0.0479851	0.0829123	-0.175203	-0.20381	-0.210846	-0.0744817	-0.206449	0.109388	-0.105998	-0.132883	-0.0929283	-0.0994005	-0.0353515	-0.241341	0.0574871	0.00627865	-0.0212317	-0.0668476	-0.167572	-0.177989	0.00744438	0.0146688	-0.0510273	0.144005	0.083396	-0.0449435	-0.0841583	-0.0551581	-0.100436	-0.0628928	-0.178516
TCCCGAAA	-0.143297	-0.418977	-0.0567595	-0.392445	0.469736	0.47312	-0.156543	-0.436351	-0.107779	-0.267366	-0.116622	-0.447108	-0.064447	-0.0419394	-0.060776	-0.339362	-0.026628	-0.257675	-0.0359405	-0.242022	0.138897	-0.344129	0.0139171	-0.380134	-0.0233105	-0.32644	-0.436957	-0.0634581	-0.0794606	-0.332331	-0.071191	-0.179317	-0.0034597	-0.365561	-0.10511	-0.328651	-0.095988	-0.164016	-0.0660797	-0.373283	0.0636816	-0.150724	-0.0624229	-0.392445	-0.0511262	-0.32815	-0.0155557	-0.28729	-0.107935
CCCGAGAG	-0.0972039	-0.299568	-0.210624	-0.0952764	0.47017	0.473634	-0.0775231	-0.0885422	-0.193181	-0.00786189	-0.172584	0.00859121	-0.0793692	-0.173283	-0.235067	-0.139147	-0.161261	-0.0912439	-0.282391	-0.0615122	-0.207263	-0.112033	-0.160033	-0.0333754	-0.231515	1.85404e-05	-0.114752	-0.21891	-0.237882	-0.0982783	-0.305061	0.0719494	-0.254975	-0.205799	-0.304818	-0.176195	-0.122185	-0.327327	-0.0656343	-0.184771	-0.31891	-0.0819361	-0.113253	0.0955868	-0.134969	-0.0648352	-0.217849	-0.131247	-0.236653
AGTCTCGG	-0.197062	0.17644	-0.0407894	0.285988	0.472052	0.477781	0.0267416	0.293	0.168349	0.260095	0.0473104	0.236205	-0.00893415	0.0206979	-0.061444	0.29856	-0.0556699	0.206584	-0.0374406	0.311085	-0.0457634	-0.0169004	-0.0715087	0.254586	-0.0462419	0.216319	0.235508	0.160193	0.0350254	0.142613	0.224722	0.11193	0.132158	0.302557	-0.139147	0.120917	0.0274034	0.00617291	0.226465	0.236129	0.106783	0.0724318	-0.0900212	0.229673	0.107525	0.236888	-0.00659062	0.211877	0.15787
CGAGATTA	0.140961	0.0398813	0.0052872	-0.204144	0.468375	0.47309	0.0353383	-0.210347	0.120976	-0.117263	0.0788011	-0.155909	0.119944	-0.0575546	0.0383441	-0.185699	0.152648	-0.0928593	0.0318022	-0.173755	-0.0606994	-0.306148	-0.00904365	-0.167985	0.0978467	-0.172816	-0.204672	0.0662516	0.0934733	-0.0740578	0.410726	0.415956	0.28904	0.203516	0.209098	0.0112244	-0.0263419	-0.203292	-0.0118448	-0.0804784	0.107202	0.215681	0.445439	0.23015	0.314933	0.255279	0.0837271	0.0168212	0.417675
CGAGACCA	0.113381	0.115252	-0.0536539	-0.014044	0.455473	0.450751	0.0797406	-0.00348802	-0.199568	-0.0421689	0.0529324	-0.0491232	0.0823347	0.0742058	-0.0341211	-0.0056022	-0.00824415	-0.094974	-0.0142267	0.0372909	-0.174958	-0.179588	-0.0597658	-0.0774326	-0.129158	-0.0758085	-0.229843	-0.186646	-0.0368791	-0.0658289	0.372274	0.417935	0.342529	0.376819	0.362894	0.269715	-0.139362	-0.195468	-0.155752	-0.0392889	0.242429	0.419175	0.241241	-0.051354	0.0302176	0.221317	0.188385	0.187684	0.452477
CGGGATCA	-0.0407669	-0.177989	-0.0987876	-0.228988	0.456532	0.456621	-0.109637	-0.231158	-0.046161	-0.123433	-0.0718892	-0.141117	0.0874538	-0.0930029	-0.137675	-0.241117	-0.223136	-0.264782	-0.0423964	-0.14828	-0.0321699	-0.134775	-0.192812	-0.189963	-0.0283093	-0.201011	-0.174232	-0.0820491	-0.10381	-0.0531323	0.0298218	-0.0347496	-0.0757327	-0.119179	-0.130103	-0.33851	-0.151286	-0.163451	-0.00428804	-0.339794	-0.0572459	-0.296257	-0.0963651	-0.173283	-0.124872	-0.0382443	-0.000402628	-0.166154	-0.0864899
AACTCCCG	-0.0624413	-0.334969	-0.207058	-0.374473	0.457004	0.459332	-0.228819	-0.29914	-0.199568	-0.111464	-0.103339	-0.277211	-0.0367296	-0.156384	-0.146852	-0.27122	-0.25784	-0.262709	-0.0478206	-0.215366	-0.235952	-0.28962	-0.183863	-0.246092	-0.292445	-0.201233	-0.286967	-0.232239	-0.131158	-0.20942	-0.0350481	-0.217393	-0.204479	-0.290658	-0.0460268	-0.304866	-0.110791	-0.119997	-0.20348	-0.0591419	-0.249757	-0.178516	0.0637952	-0.132331	-0.0851043	-0.159346	-0.00727174	-0.286967	-0.135164
AGGTCTCG	-0.147886	-0.0923742	-0.310292	-0.108884	0.459087	0.461845	-0.205849	-0.226043	-0.273755	-0.150864	-0.167985	-0.170774	-0.170997	-0.0418648	-0.26216	-0.0812649	-0.248413	-0.0356151	-0.234582	-0.0542812	-0.395861	-0.163451	-0.246092	-0.0943442	-0.350169	-0.237572	-0.187943	-0.344855	-0.335262	-0.104191	-0.185699	-0.0867587	-0.306349	-0.134294	-0.347625	-0.129243	-0.349485	-0.114935	-0.272816	-0.197062	-0.373755	-0.114509	-0.222988	0.0155336	-0.239903	-0.10846	-0.315739	-0.0758391	-0.296658
CGGGATTC	-0.156703	-0.184164	-0.100568	-0.136351	0.458686	0.466295	-0.154821	-0.110679	-0.211862	-0.0470153	-0.277989	-0.270997	-0.179317	-0.169465	-0.163078	-0.186012	-0.110292	-0.240561	-0.153313	-0.0717446	-0.322113	-0.364207	-0.259688	-0.14045	-0.303058	-0.141229	-0.192812	-0.22204	-0.264782	0.00508911	0.0500183	-0.0266602	0.0181876	0.135704	0.0526867	-0.00536372	-0.32636	-0.159517	-0.268613	-0.196257	-0.0240061	0.177434	-0.0485051	-0.183565	0.0301525	-0.0166446	0.050898	-0.0518095	-0.0547766
CGATCCCG	-0.0268433	-0.151713	0.0694174	-0.157025	0.461098	0.465543	-0.00725357	-0.116368	0.0441053	-0.0705737	-0.0149717	-0.27167	-0.0048577	-0.18729	0.103814	-0.209151	0.055488	-0.0652196	0.17611	-0.0742233	0.0709172	0.00871039	-0.0145792	-0.00878587	0.0896422	0.00297071	-0.165561	0.0470064	-0.00168272	-0.0803023	-0.0287802	-0.0295465	-0.0767413	-0.0601647	-0.00880029	-0.200568	-0.0700375	-0.154061	0.0596446	-0.195078	0.11771	-0.25986	0.0878152	-0.0345562	-0.0871672	-0.169037	0.0177579	0.00332544	-0.0765101
CGGGAATA	0.0364715	-0.237469	-0.167778	-0.0810591	0.462807	0.466234	-0.0585368	-0.273755	-0.225727	-0.154821	-0.192812	-0.15817	-0.262525	-0.102919	-0.134969	-0.0961956	-0.22233	-0.146471	-0.281816	0.0957637	-0.164782	-0.126122	-0.267366	-0.144612	-0.12644	-0.239469	-0.100393	-0.0543343	-0.205453	-0.0588076	-0.386328	-0.328316	-0.336351	-0.151286	-0.300524	-0.0902427	-0.236552	-0.00626702	-0.20048	-0.105651	-0.18041	-0.173049	-0.170553	-0.17986	-0.191009	-0.101055	-0.251999	-0.107779	-0.307831
CCTCTCGA	0.100993	-0.093322	0.0992146	0.104875	0.464264	0.459379	-0.00381088	0.065575	0.236504	0.169917	0.146317	0.106121	0.143427	0.218839	0.195934	0.11137	0.103337	-0.0198495	0.148517	0.159253	0.0858208	0.116635	0.00565024	0.0470016	0.0109187	0.063986	-0.00535413	0.185471	0.0503485	0.0772794	-0.000283956	-0.230803	0.0541105	0.000965992	-0.127901	-0.130364	-0.0186398	0.0229917	0.0934177	0.127914	0.133188	0.18538	0.036801	0.0624122	-0.0178447	0.0716459	0.172597	0.128091	-0.0190797
ATTTCTCG	-0.0079232	-0.0659011	-0.18729	-0.120761	0.469647	0.462167	-0.0426859	-0.122548	0.0361999	-0.0658425	-0.17986	-0.195861	-0.0635862	-0.124336	-0.132057	-0.197469	-0.205552	-0.135164	-0.154821	-0.0932141	-0.132698	-0.192082	-0.163451	-0.150307	-0.157512	0.0652553	-0.253462	-0.16073	-0.0900061	0.0289496	-0.210902	-0.0796095	-0.142251	-0.120901	-0.248413	-0.127737	0.0872645	-0.0253793	-0.0123976	-0.061475	-0.215552	-0.0510935	-0.0491602	-0.186012	-0.160033	-0.105601	-0.117587	-0.246725	-0.252143
GTCCCGAA	0.173552	0.043838	-0.0107359	0.210161	0.471332	0.467013	-0.154975	0.0230994	-0.233161	0.0109148	-0.0613663	-0.070321	-0.131069	-0.0400331	0.0224168	0.0741577	-0.113371	-0.0420195	0.205823	0.096198	-0.301728	0.090182	-0.0845296	0.0877123	-0.0935183	0.0401043	0.0980387	-0.14389	-0.233724	0.0428922	-0.19431	-0.00265133	-0.153611	0.123338	0.0470646	0.00178548	-0.192082	-0.0042465	-0.253462	0.0313556	-0.169897	0.0679601	-0.132422	-0.0174465	0.00550881	0.0703965	0.0591545	0.0663054	-0.273518
CATTCCCG	-0.00807168	-0.166756	0.0273534	0.0317304	0.470068	0.46563	0.0216405	-0.11986	-0.0701184	-0.135067	-0.132331	-0.0296587	-0.0856108	0.144705	-0.0193711	0.0355396	-0.00716262	-0.162893	-0.049672	-0.0344249	-0.176955	-0.124336	-0.128988	0.0461189	-0.0696741	-0.0293943	-0.0914949	-0.12321	-0.0722985	1.30703e-05	-0.192812	0.0346621	-0.0159916	0.158751	0.038578	0.147495	-0.0405632	-0.114813	0.0277388	-0.0492182	0.0490697	0.148029	0.0642779	0.0418099	0.173207	0.0714512	-0.011343	0.145231	-0.0148121
ATCGGGAA	0.0556973	-0.131247	0.0483865	-0.21798	0.469507	0.461514	-0.0523503	-0.201457	0.119905	-0.136151	-0.0343003	-0.2007	0.050877	-0.266354	0.0614257	-0.154363	-0.138405	-0.267366	-0.0221331	-0.113312	0.0438202	-0.208672	-0.0261199	-0.223958	-0.0478494	-0.255752	-0.320551	0.082723	0.0563367	-0.195078	-0.110679	-0.310018	0.0313825	-0.261798	-0.0947183	-0.318376	0.00593725	0.0266243	-0.0186164	-0.304576	0.0210003	-0.32161	0.0639526	-0.174473	-0.0162588	-0.361083	0.0172842	-0.291364	-0.164207
ACTCCCGG	0.142385	-0.338934	-0.0605074	-0.19393	0.471522	0.458747	-0.0864594	-0.296658	-0.215428	-0.0743429	-0.166154	-0.277989	0.0390749	-0.142251	-0.0924376	-0.209691	0.0957537	-0.290309	-0.0416938	-0.107417	-0.126281	-0.162893	-0.0981612	-0.182681	0.00955086	-0.119997	-0.247366	-0.143533	-0.147496	-0.204048	-0.212784	-0.204479	-0.0504346	-0.200568	-0.0755532	-0.11549	-0.14045	-0.154975	-0.225337	-0.114874	-0.208884	-0.178781	0.105826	-0.158004	-0.0044119	-0.145469	-0.177211	-0.26517	-0.182974
CCCGAGAC	-0.0321401	-0.111126	0.0384007	0.0469775	0.472297	0.454458	0.0654746	0.0377915	-0.0542086	-0.0288017	0.126588	0.054162	0.12197	-0.0505978	-0.0072779	0.0682914	0.0537907	0.086075	0.0440523	-0.247625	-0.097595	-0.0389968	-0.073815	0.150912	-0.10804	0.202837	0.078227	-0.114935	-0.136051	0.042792	-0.0973258	0.0219241	-0.065872	0.165562	-0.195468	0.0433034	-0.0849566	-0.053957	-0.0447267	0.132624	-0.0975301	-0.0656739	-0.074206	0.205397	-0.0433036	0.139504	-0.0876707	0.0357459	-0.252433
AATCTCGG	-0.211691	-0.0811176	-0.0584162	0.0464596	0.478091	0.457044	-0.0349185	-0.154061	0.0969349	0.0612609	-0.111691	0.0199967	-0.157025	0.0700653	-0.0781262	0.0167978	-0.17986	0.0242939	-0.265956	-0.00376757	-0.185699	-0.219723	-0.137263	0.0522734	-0.173993	-0.0442573	-0.0488403	-0.101728	0.0872025	0.114849	0.0414237	0.166219	0.0984565	0.268046	-0.114267	0.0594854	-0.0860971	-0.0986826	-0.0517005	-0.221325	0.0707683	0.139608	0.151691	0.120256	0.00796276	0.171005	0.0620425	0.2391	0.165077
GATCGGGA	-0.0147128	-0.161439	-0.200261	-0.0476682	0.477373	0.463695	-0.0332993	-0.155909	0.0463384	-0.0228495	0.0551718	-0.136351	-0.122403	-0.167162	-0.120831	-0.024057	-0.0678621	-0.146471	-0.151713	-0.063433	-0.169037	-0.10716	-0.227819	-0.100789	-0.0951562	-0.208619	-0.117198	0.122281	0.00026787	-0.00723453	0.0486099	-0.0922447	0.0847171	-0.00636612	0.0738896	-0.14168	-0.00166191	-0.127984	0.15552	-0.0802477	0.114934	-0.00599569	0.0043902	-0.272354	-0.0603469	-0.0748651	-0.0908776	-0.0439426	0.0708882
CATCTCGA	0.24607	0.052202	0.178865	0.117922	0.475014	0.462719	0.303079	0.174614	0.305246	0.0239485	0.225362	-0.0501097	0.150907	-0.0421277	0.17792	0.0637555	0.246736	0.127486	0.0235897	-0.0158268	0.351882	0.12051	0.229224	0.0884021	0.251637	0.130173	0.101794	0.332459	0.298427	0.107055	0.2712	-0.0482695	0.255721	0.0815139	0.0538086	-0.0868263	0.219571	0.14564	0.211199	0.0682754	0.255348	-0.153018	0.234423	0.00956386	0.226014	0.0641617	0.188249	-0.0585274	0.21038
ACGAGACT	-0.254975	0.00181398	-0.0644485	0.107848	0.473877	0.459941	-0.140782	0.117387	0.0271125	0.122371	-0.0209344	0.0552372	0.0502825	0.0648711	0.0490896	-0.0685088	-0.114026	0.00173715	-0.167985	-0.0372689	-0.0617509	-0.0118416	-0.0647115	0.0945932	-0.209474	0.0370878	0.0582395	-0.0431113	-0.0358577	0.00221181	0.0988094	0.134948	0.0813797	0.246246	0.0341966	0.0403329	-0.0493747	-0.0789636	-0.141005	0.00574382	-0.0410847	0.176362	0.025869	-0.000824644	-0.0507175	0.00442794	0.0994289	0.200951	0.126883
ATCCCGAT	-0.114752	-0.4266	-0.0557872	-0.351999	0.468576	0.459124	-0.227491	-0.356543	-0.193181	-0.105799	-0.132057	-0.447108	-0.165365	-0.314874	-0.0597926	-0.375449	-0.000162687	-0.210347	0.048441	-0.12668	-0.196658	-0.306349	-0.101323	-0.386328	-0.299568	-0.305453	-0.430364	-0.19393	-0.0551419	-0.0294299	-0.109691	-0.306956	-0.008187	-0.372354	-0.197469	-0.322621	-0.119791	-0.222475	-0.278781	-0.398297	0.0223736	0.266537	-0.00903108	-0.275945	-0.0197878	-0.347625	0.0492834	-0.278252	-0.115989
CGCTCCCG	0.0935286	-0.227409	-0.0461946	-0.205012	0.465163	0.458909	0.115988	-0.30575	-0.057366	-0.112901	0.0451778	-0.352578	-0.0153537	-0.150307	0.0469092	-0.262342	0.0083436	-0.236957	0.0973344	-0.182974	-0.0578274	-0.288606	-0.132148	-0.243415	-0.184466	-0.215181	-0.31343	-0.119044	0.00618745	0.121321	-0.158503	-0.149485	0.106306	0.0077579	-0.0708407	-0.220901	-0.0427764	-0.251428	-0.264016	-0.270333	-0.225104	-0.107314	0.00811589	-0.199568	-0.145346	-0.31945	-0.00363566	-0.221396	-0.185387
CGGGAACG	-0.206048	-0.0342529	-0.0534833	0.0764959	0.465026	0.461887	-0.221325	-0.175449	-0.0784889	-0.205799	-0.0683288	0.044979	0.161316	-0.0116358	-0.142366	-0.0609577	0.0229444	0.151801	-0.00324979	-0.0607138	-0.131605	-0.14034	-0.141341	-0.0171488	-0.24437	0.164877	0.105853	-0.0818036	-0.183863	-0.1383	-0.221968	-0.071028	-0.168613	-0.132148	-0.282102	-0.193554	-0.122475	-0.0843387	-0.0909601	0.0470898	-0.106349	0.00662409	-0.246725	0.071436	-0.19431	-0.0621571	-0.152871	-0.0273579	-0.173283
CGAGATTC	-0.0453314	-0.0820724	-0.0137928	0.126671	0.464112	0.463158	-0.112726	0.0793678	-0.0885252	0.129248	-0.1383	-0.0123701	-0.130452	0.224001	-0.067106	0.101739	-0.0855444	-0.135655	-0.202503	-0.0607008	-0.120412	0.0626743	-0.0908611	0.0483929	-0.176955	0.0131521	0.0286477	-0.147756	-0.0521924	0.0464116	-0.15986	0.088885	-0.09809	0.141049	-0.210846	0.0081478	-0.0356072	-0.131966	-0.15986	0.060251	-0.0630935	0.0118499	0.0138964	-0.00406547	0.0207304	0.0447526	-0.0351813	0.177666	-0.0798101
TATCGGGA	0.0732049	-0.0152022	-0.201412	0.136696	0.461427	0.461232	-0.152578	-0.215243	-0.236653	-0.0420535	-0.14828	-0.135754	-0.14168	-0.0243723	-0.0685511	0.0414906	-0.0558137	-0.0973708	-0.159346	0.119876	-0.184771	-0.0678818	-0.14318	-0.0144273	-0.182391	-0.174232	-0.142136	-0.163827	-0.286646	-0.066214	-0.320412	-0.108355	-0.211295	-0.109151	-0.0715734	-0.133068	-0.298716	-0.0967192	-0.255909	-0.0808843	-0.234199	-0.0542797	-0.129499	0.140431	-0.20348	-0.048751	-0.194692	0.0287234	-0.213371
ATTCCCGG	0.0939257	-0.180688	-0.0755537	0.136234	0.457373	0.464234	-0.0787794	0.0153481	-0.118376	0.0296904	-0.284466	-0.00776462	-0.201323	0.127569	0.00484589	0.0617316	0.020355	-0.0507631	-0.0625927	0.118427	-0.174715	-0.0443325	-0.187943	0.146414	-0.0782374	-0.094505	0.024298	-0.136452	-0.0013904	0.0673835	-0.193554	-0.111182	-0.0133143	-0.0371481	0.00309101	-0.0625457	-0.118046	-0.0291225	-0.101323	-0.00296108	-0.086974	0.11413	-0.0282483	0.11811	0.0153025	0.187923	-0.0893547	0.216426	-0.175203
TCGGGAAA	-0.173518	-0.278781	-0.184466	-0.244249	0.458474	0.459461	-0.243415	-0.286012	-0.151004	-0.134486	-0.177728	-0.282974	-0.062672	-0.109151	-0.157349	-0.268613	-0.123062	-0.141454	-0.0206931	-0.167778	-0.0981395	-0.19431	-0.1451	-0.238091	-0.188606	-0.123882	-0.161083	-0.120066	0.00608674	0.0135737	-0.0422346	-0.298297	0.0895418	-0.190658	-0.13851	-0.210735	-0.185387	-0.239686	0.0141128	-0.354975	0.280186	0.0819421	0.0408816	-0.0757344	0.164656	-0.337161	-0.118442	-0.161979	0.104213
CCGAGAGC	0.0032943	-0.249214	0.0333477	-0.0981096	0.454783	0.46041	-0.107883	-0.100877	0.0509421	-0.137779	-0.0457943	-0.13536	-0.140561	-0.247886	0.09566	-0.149485	-0.0372174	-0.0870703	0.0735399	-0.180134	0.0329025	-0.0367444	0.111854	-0.073145	0.254687	-0.10716	-0.09961	-0.00862841	-0.110791	-0.0801901	-0.0806775	-0.121254	0.0922525	-0.170333	-0.142366	-0.163827	-0.0339072	-0.0448588	0.147477	-0.250031	-0.0513795	-0.208513	0.144131	-0.144009	-0.0502472	-0.140671	-0.00772543	-0.101457	0.0284357
AGTCTCGC	-0.0784302	-0.197062	-0.252433	-0.145346	0.454921	0.460998	-0.152288	-0.22636	-0.2767	-0.118376	-0.253313	-0.124642	-0.256067	-0.137469	-0.252143	-0.0862602	-0.120971	-0.274473	-0.177728	-0.0272834	-0.222695	-0.139686	-0.186646	-0.252143	-0.203763	-0.144612	-0.250031	-0.299568	-0.25784	-0.122548	-0.0994108	0.0265718	-0.241567	-0.118842	-0.118177	-0.108513	-0.227327	-0.125337	-0.336251	-0.173993	-0.439577	-0.136552	-0.137366	-0.242946	-0.116368	-0.0423473	-0.331876	-0.0883389	-0.103058
CAGTCCCG	-0.0511619	-0.0477856	-0.208355	-0.0794861	0.4549	0.462283	-0.205306	-0.184771	-0.104964	-0.172354	-0.0612786	-0.0260828	-0.0666432	-0.0522248	-0.260555	-0.146471	-0.078013	-0.0845938	-0.0855784	-0.0512905	-0.0143422	-0.189963	-0.085687	-0.114388	-0.145717	-0.014354	-0.0581074	-0.139362	-0.0685941	-0.056589	-0.102136	0.0157933	0.0588715	-0.0388773	-0.132422	-0.0017655	-0.110127	-0.157349	-0.0663819	-0.0638922	-0.130277	0.0704923	-0.0130055	0.0270856	0.0767131	-0.0139209	-0.158503	-0.175203	-0.0346248
ACCCGAGA	-0.0553087	-0.117718	-0.215058	-0.0789331	0.454947	0.463294	-0.172816	-0.157187	-0.128567	-0.0225647	-0.162525	0.0517386	-0.165561	0.0357808	-0.136452	-0.0815908	-0.0603337	0.0168196	-0.0203621	-0.0709596	-0.0785493	-0.0674661	-0.0521384	-0.105651	-0.119314	-0.188273	-0.19393	-0.090527	-0.0731991	0.022174	-0.232883	-0.198716	-0.128567	-0.0844874	-0.0744156	-0.111748	-0.17986	-0.122113	-0.0239598	-0.225885	-0.12204	-0.10655	0.00869144	-0.179048	-0.125727	-0.1383	-0.0870307	0.0686212	-0.0999831
ATTCTCGC	-0.0749536	-0.0425844	0.0268717	-0.0540484	0.454235	0.467443	0.114537	-0.0575365	-0.234872	-0.0665898	-0.0906232	-0.0327503	0.138809	-0.0111807	0.0307636	0.0529746	0.118233	-0.00248574	0.0999606	0.0455871	-0.0454683	-0.236452	0.102974	0.139471	0.0732473	0.0118562	-0.1065	-0.0159011	-0.0415712	-0.00918508	0.063005	0.0716081	-0.0249904	0.0303299	0.10605	0.0204015	-0.000762678	0.249239	0.0455603	0.163923	0.0216025	0.085151	-0.0488989	0.0359769	0.0186539	0.167001	0.0199803	-0.0123641	0.107375
ACTCTTGA	-0.0121844	-0.142829	-0.256384	-0.186328	0.448149	0.468729	-0.247108	-0.226122	-0.288606	-0.156384	-0.163264	-0.201863	-0.139254	-0.0615553	-0.0961682	-0.0929977	-0.0622279	-0.131158	-0.146092	-0.116622	-0.204001	-0.0608814	-0.146471	-0.122915	-0.0543657	-0.0625851	-0.25986	-0.265365	-0.108619	-0.223657	-0.207883	-0.172584	-0.239147	-0.214448	-0.0649074	-0.214146	-0.319246	-0.229243	-0.191364	-0.0717661	-0.213966	-0.190658	-0.0711845	-0.160906	-0.162342	-0.195861	-0.16925	-0.229158	-0.239469
CGAGACCC	0.161177	0.0293144	0.144557	0.182434	0.453365	0.46277	0.163365	0.235454	0.0444144	0.017096	0.0606286	-0.0201866	0.00568088	0.134101	0.117198	0.118442	0.123357	0.137059	0.0302322	0.0814914	0.1511	0.114828	-0.0481938	0.236198	0.234864	0.173991	0.23354	0.142291	0.147266	0.0873398	0.140782	0.123281	0.174801	0.0295321	-0.111805	-0.0255452	0.104514	-0.000740893	0.250611	0.202182	0.00907936	0.0293299	0.0192324	0.230016	0.0514638	0.238116	0.0746838	0.22203	0.109156
AGACGAGA	-0.0574828	-0.146344	-0.107417	-0.241794	0.452781	0.462573	-0.197881	-0.182102	-0.0973855	-0.0389471	-0.347108	0.013076	-0.0180077	0.0225538	-0.0586462	-0.12644	-0.140671	-0.0800983	-0.0692754	-0.184164	-0.183863	-0.186967	-0.265758	-0.207366	0.0707393	0.0188108	-0.135952	0.0518025	-0.223284	0.0498802	0.0277434	-0.260206	-0.00595039	-0.0898982	-0.138722	-0.226201	-0.248945	-0.0405915	-0.0219087	-0.149485	-0.147496	-0.215428	-0.0503157	-0.0448717	-0.0301955	-0.160906	-0.151004	0.00559369	-0.114874
CGAGAGCC	-0.133348	0.0115219	-0.0222615	-0.0930184	0.449157	0.461068	-0.0294673	-0.132239	0.182143	-0.167572	-0.0610621	-0.0327706	-0.0683476	-0.066147	-0.0345151	-0.173049	-0.0438093	-0.0755199	-0.108197	-0.119111	-0.0263288	-0.114206	-0.0519211	-0.266959	-0.0150471	-0.21891	-0.134679	0.115858	0.21937	-0.0690532	-0.0573907	-0.185699	0.091679	-0.058553	0.0554477	-0.196658	0.0130588	-0.208778	0.156326	-0.264589	0.215075	-0.0256138	0.110968	-0.0925582	0.104136	-0.213787	0.000529165	-0.16968	0.0364335
TCGCGAGA	0.0237207	-0.0896936	-0.257025	0.185479	0.447225	0.458072	0.024442	-0.103245	0.025476	0.000827987	-0.122841	-0.138405	-0.0994481	-0.025681	-0.135556	0.153224	-0.0187612	-0.18729	0.0289352	0.0748682	0.151022	0.0593102	-0.160906	0.00716191	0.0178139	-0.0844145	-0.0565166	-0.0216504	-0.0289642	-0.0847372	-0.228483	-0.255909	-0.0974031	0.000260057	-0.242481	-0.14828	-0.106349	-0.16216	-0.118243	-0.0549305	-0.185699	-0.170333	-0.277728	0.012924	-0.336957	0.0200572	-0.193554	0.00616711	-0.177211
GCCGAGAA	-0.0279826	0.133188	0.0739889	0.137086	0.444895	0.460987	-0.0951407	0.0191744	0.030022	0.0288618	-0.0508554	0.0383214	0.0945315	0.0255192	0.0309387	-0.0107645	-0.0279901	0.120722	0.118229	0.180745	0.139853	-0.0308486	0.0606578	0.0860022	-0.00124437	-0.0415898	0.175122	0.035296	-0.0319372	0.0382089	-0.0872092	-0.2011	-0.04926	0.0128721	-0.107935	-0.136251	0.0182179	-0.102319	0.0355051	-0.00734338	-0.0620417	0.0801006	-0.0792172	-0.058799	0.0278294	0.0183397	-0.0536565	0.0417408	-0.118977
AATCTCGT	0.0380284	0.270099	-0.160033	0.175124	0.443329	0.461946	-0.0554039	0.0193468	-0.141229	0.0171929	-0.268403	-0.00753853	-0.230892	0.151744	-0.211295	0.177229	-0.0134342	-0.0195991	-0.251145	0.173967	-0.111634	-0.16073	-0.205355	-0.0627451	-0.0799757	-0.0696396	0.0121235	-0.0548138	-0.0272959	0.227468	-0.117005	-0.0664125	0.19689	0.293736	-0.169465	-0.00185665	-0.0771338	0.0187948	-0.0426955	0.0188267	-0.0518443	0.0160228	-0.306048	0.0477198	-0.209691	0.146207	-0.134679	0.211166	0.00861701
CCGAGAAC	-0.0277068	-0.0761982	0.0663487	0.214981	0.442259	0.460809	-0.182681	0.0550753	0.0351302	0.060986	-0.149894	-0.0427952	-0.0319576	-0.0607352	0.0316487	0.170768	0.00647065	-0.00511925	0.113094	0.031602	0.162561	-0.00698424	-0.0502968	0.289792	0.213435	0.0817032	0.0483202	0.0188439	0.0328124	-0.0332307	-0.0813363	-0.0930946	0.167421	0.0467217	-0.0464725	0.0636375	0.079279	-0.116877	0.0403268	-0.0691948	-0.0874987	0.0819804	0.105785	0.229851	0.0756004	0.111757	-0.00463137	0.19392	0.071555
CGAGAAAA	0.12572	-0.25157	-0.259346	-0.226761	0.439924	0.458041	-0.187943	-0.303386	-0.324033	-0.130364	-0.194692	-0.185078	-0.112552	-0.184164	-0.22233	-0.227084	-0.136856	-0.222695	-0.188941	-0.175203	-0.276955	-0.15391	-0.186328	-0.160033	-0.232331	-0.148413	-0.257187	-0.253018	-0.138405	-0.111295	0.107935	-0.00109589	-0.113136	-0.161618	0.108413	-0.145593	-0.168194	-0.16968	-0.298297	-0.0535897	-0.266756	-0.0903667	0.18573	-0.0453335	0.0566909	-0.108249	0.0552043	-0.115927	0.0208923
CCGAGACC	-0.1767	-0.141005	-0.254363	0.10333	0.440103	0.455811	-0.130016	-0.073882	0.045353	-0.0582995	-0.277211	-0.131695	-0.174958	-0.076972	-0.243297	-0.0505944	-0.00913997	-0.313253	-0.203668	-0.0300033	-0.184164	-0.09438	-0.208938	-0.049739	-0.173993	-0.233348	0.00873743	-0.0916093	-0.0813668	-0.0331577	-0.00330065	-0.231426	-0.141117	-0.0288838	-0.233348	-0.113549	-0.286328	-0.121254	-0.0238054	-0.184164	-0.071113	-0.18962	-0.0693091	-0.0787301	0.01115	-0.133348	-0.0843678	0.0294696	0.0249713
AGCTCTCG	-0.0500829	-0.237882	-0.102091	-0.150864	0.438379	0.452796	-0.217587	-0.249214	-0.0730529	-0.054486	-0.208725	-0.136653	-0.0349204	-0.114813	-0.111919	-0.0972349	-0.140782	0.0146921	-0.00628554	-0.166555	-0.196658	0.0379832	-0.071987	0.107819	-0.174473	0.073273	-0.0680763	-0.116813	0.0774965	-0.117198	-0.0482726	-0.120831	-0.107727	-0.0486215	-0.197881	-0.138195	-0.134872	-0.280967	-0.0536997	-0.213608	-0.178781	-0.0987766	0.0805162	0.135811	0.0153059	-0.0767001	0.0355501	-0.109637	-0.0738742
CGAGAAAC	-0.172125	-0.166756	-0.0743263	-0.209963	0.435158	0.453108	-0.141229	-0.197881	-0.208249	-0.164782	-0.20278	-0.155752	-0.0115696	-0.158503	-0.0884346	-0.275945	-0.00625664	-0.084356	-0.0934745	-0.184164	-0.192812	-0.248945	-0.0976706	-0.0752199	-0.108831	-0.1767	-0.192082	-0.157675	-0.0419662	0.0304566	-0.00486115	0.131483	0.151949	0.253053	0.0311124	-0.155752	-0.189963	-0.3	-0.202641	-0.182974	0.0687568	0.283778	0.175764	0.111537	0.0865452	0.198428	-0.0486078	0.07275	0.0935688
GATCTCGC	-0.250864	0.0897016	0.0585798	-0.000790266	0.434469	0.452843	-0.217587	0.0888231	-0.106854	0.0948768	-0.0115417	0.15859	0.157353	-0.0474614	0.046878	0.156719	-0.0218372	0.168305	0.0735929	0.0398404	-0.0352873	-0.0897583	-0.0211157	0.0603051	-0.155909	0.147486	0.0908019	-0.0817072	-0.0523998	-0.0874437	0.000224038	0.0268757	0.0273804	0.104524	-0.0150272	-0.0604749	-0.031298	-0.131515	-0.0534944	0.0499327	-0.0555897	0.0560728	-0.0837612	0.156278	0.00152637	-0.00813276	0.0579279	0.0924874	-0.0143141
AATCTCGC	0.0171666	-0.0262001	-0.0466926	-0.117393	0.416238	0.451398	-0.139147	-0.150031	-0.0982462	-0.174958	-0.0339863	-0.11512	0.0404093	-0.148017	-0.0563275	-0.0598055	-0.130539	-0.115304	0.00351194	-0.00149631	-0.154212	-0.273283	-0.0745399	-0.16517	-0.202182	-0.0290012	-0.137572	0.00954567	0.0192109	-0.00958051	0.118617	0.0770741	-0.107263	0.00909867	-0.0179373	-0.0624739	-0.158838	0.129873	0.019527	-0.105998	0.0557033	0.103015	-0.0671072	-0.123882	-0.0938559	0.00505309	0.0397196	-0.0297749	0.207353
GCTCTTGA	0.343189	0.347979	0.192848	0.0847206	-0.139041	-0.0621964	0.33853	0.302008	0.0481301	-0.0174433	0.363234	0.326321	-0.0334548	0.0609762	0.118371	0.207688	0.454069	0.204977	0.155986	0.293991	0.106106	-0.0616522	0.150529	0.0446786	0.338803	0.0855201	0.314337	0.286377	0.100181	0.022291	-0.00225037	-0.0326563	0.242177	0.0527304	0.00133539	-0.138616	-0.0169181	0.00811326	-0.0745392	0.00174311	0.0399875	-0.0718548	-0.267778	0.0756727	-0.113136	0.00545089	-0.086153	-0.129499	0.121997
TAGGCACA	-0.0569469	0.0759185	-0.132606	-0.0686808	-0.113608	0.0323726	0.480395	0.468681	0.174963	-0.0292432	-0.0601161	-0.0835823	-0.0359928	-0.121325	-0.113018	-0.211634	-0.201368	-0.129073	-0.146218	0.0700798	0.332208	0.307671	-0.0202353	-0.0644095	0.375054	0.0047579	0.267077	0.0805128	-0.00215542	0.0651737	-0.113668	-0.21152	-0.247756	-0.176955	-0.176447	-0.326841	0.0339314	0.181157	-0.0511215	-0.166354	-0.151145	-0.376195	0.0277417	-0.0708587	-0.08043	-0.225259	-0.0136166	-0.231876	-0.055766
CGTAGTCC	0.0384904	-0.0599426	0.0827901	-0.130627	-0.0830105	0.00794909	0.472134	0.454769	0.0151275	-0.0479292	0.0430433	0.0588851	-0.167366	-0.163078	-0.025152	-0.116304	0.121443	-0.0700223	0.0324495	-0.117457	0.294067	0.309876	0.115354	-0.125259	0.382957	-0.0500797	0.116372	0.0865134	0.0940885	-0.0204192	0.107665	-0.133348	-0.0297487	-0.183565	0.284476	0.00959044	0.113921	0.1298	-0.0803164	-0.138722	-0.0546806	-0.121183	0.0289554	-0.137366	-0.13536	-0.168194	0.0413418	-0.147756	0.0908346
CACTACGC	-0.02366	0.177334	-0.0404159	-0.0615057	0.00923655	-0.0830961	0.479501	0.45911	0.0630619	-0.0401881	-0.0506653	0.0239342	-0.114813	0.0468872	-0.065977	-0.106349	0.146265	-0.0782611	-0.0386486	0.0478684	0.399474	0.362653	0.0352146	-0.0931421	0.399167	0.0538627	0.304538	0.249605	0.0501967	-0.0653858	-0.0596169	-0.0756977	0.0349223	-0.148945	-0.10278	-0.104528	-0.101011	-0.0380834	-0.0438319	-0.133724	0.00411889	-0.101682	0.0677569	-0.0639229	0.143301	-0.0265342	-0.0466906	-0.0193	0.123227
CCGTAGTC	-0.00205026	-0.130452	0.142183	-0.0998249	0.0237085	-0.0520288	0.482169	0.427218	0.180836	0.0320264	0.164215	0.0161978	0.142507	-0.121183	0.13112	0.052023	0.135412	-0.10511	0.0725767	-0.0747011	0.393546	0.323015	0.0877062	-0.0332497	0.431684	-0.118177	0.170675	0.266556	0.246727	-0.0797247	0.0553998	-0.114026	-0.0343222	-0.10752	0.0283603	-0.127003	0.182167	0.0405018	0.0984083	-0.0762288	0.107117	-0.010261	-0.00583584	-0.144612	-0.0103909	-0.0852921	0.222666	-0.159688	0.147648
ACTACGCT	-0.260906	-0.0470686	-0.191721	-0.295468	-0.0694313	-0.160033	0.484488	0.430147	0.103017	0.0178782	-0.0920085	-0.216877	-0.220621	-0.166354	-0.150031	-0.280967	-0.123433	-0.130364	-0.190658	-0.168194	0.410218	0.351959	-0.0708482	-0.267366	0.413033	-0.0762494	0.160533	0.279422	0.0488829	0.00868081	-0.080856	-0.262525	-0.244491	-0.119314	-0.234679	-0.295078	0.0283461	0.0276269	-0.0464786	-0.270997	-0.0394042	-0.269897	-0.0805416	-0.20942	-0.0446639	-0.24023	-0.0396601	-0.222257	0.133193
ACGTAGTC	-0.198716	-0.103621	-0.0620843	-0.105502	-0.131247	0.00606763	0.479564	0.415138	-0.11798	0.0763217	-0.25867	0.0942008	-0.201368	-0.053334	-0.121254	-0.089033	0.0710901	-0.107007	-0.132148	0.0472788	0.298046	0.23135	-0.0170723	0.0253312	0.383155	0.0802213	0.187307	0.0111888	0.0642759	0.196719	-0.20278	-0.163639	-0.0582229	-0.151713	-0.0152819	-0.0388052	0.285902	0.344456	-0.100922	-0.100218	-0.183268	-0.0105815	-0.234775	0.0479172	-0.012205	-0.160555	-0.116052	-0.186012	0.016549
CGTAGTGC	-0.0107445	0.0265648	0.0717539	-0.0735815	0.0379926	-0.105012	0.475895	0.416604	0.122588	-0.0320898	-0.102136	-0.0208347	-0.0919265	-0.156384	-0.124033	-0.0668328	0.0224528	0.0223386	-0.0250607	-0.0816332	0.37536	0.360686	0.0778341	-0.0414279	0.390148	0.149452	0.247884	0.177038	0.113571	0.0621556	-0.0629511	-0.0451694	-0.0755115	-0.00783224	-0.107883	-0.0845792	0.224856	0.106704	0.0972701	0.0684565	0.109454	-0.246852	0.0727787	-0.0630296	0.0434903	0.0901941	-0.192812	-0.0720363	0.00820346
ACCGTAGT	0.113185	-0.147756	-0.0355251	-0.21891	-0.0240483	-0.0867683	0.470115	0.384922	0.120588	0.0852003	-0.041987	-0.159176	-0.108355	-0.184466	-0.0107906	-0.0902559	0.0242231	0.0033293	-0.0747851	-0.219928	0.379229	0.371152	-0.132239	-0.213906	0.362803	0.160275	0.143222	0.174632	-0.163078	-0.16038	-0.124109	-0.0981741	-0.128316	-0.231605	-0.00402662	-0.117328	-0.0976657	-0.128651	0.0067881	-0.149485	-0.122403	-0.314874	-0.0681338	-0.0836091	-0.139147	-0.0845284	-0.0997234	-0.104721	-0.143533
CGTAGTTA	0.00362255	-0.209044	0.0842106	-0.192082	0.050842	-0.11296	0.4629	0.366885	0.0328978	0.0602675	0.0567776	-0.015154	0.0245068	-0.0635158	0.131011	-0.205453	-0.026056	-0.147237	0.00253792	-0.237986	0.375393	0.371935	0.0140048	-0.166555	0.372023	-0.0287534	0.105922	0.207399	0.0827829	0.00419052	0.113039	-0.0679976	0.1231	-0.122915	0.0211404	-0.157187	0.0254907	0.0374898	-0.0511413	-0.16925	-0.00174086	-0.144129	0.0861229	-0.154668	0.0409093	-0.119654	0.0613118	-0.0925286	-0.00506339
AACTACGC	0.368844	0.317578	0.116763	-0.105849	-0.119044	-0.0355746	0.461697	0.383068	0.07197	-0.133348	-0.125259	-0.0214768	-0.040543	-0.101457	0.105915	-0.045484	0.173733	-0.029874	-0.0499407	0.140449	0.0340102	-0.262893	-0.0837684	-0.124565	0.149784	-0.110403	-0.0159663	0.0392685	-0.0413458	0.0302723	0.00728085	-0.100568	-0.0780643	-0.174715	-0.0546521	-0.139254	-0.142136	-0.157349	0.113086	-0.0770073	-0.0277636	-0.233913	0.0265521	0.0294738	0.0126728	-0.253018	-0.181816	-0.21209	0.0314468
ACGTGACT	0.012945	-0.096611	0.0594622	-0.126043	-0.0359672	-0.0878112	0.457274	0.418408	0.110461	-0.0514797	0.200958	-0.0906725	-0.077783	-0.139041	-0.045699	-0.21798	0.0394271	-0.0456947	0.0633964	-0.200436	0.327928	0.331284	0.0402612	-0.204479	0.271414	-0.0276816	0.154756	0.0866733	0.161572	-0.00785633	0.0536302	-0.242829	0.101603	-0.163078	0.165174	-0.139469	0.199148	0.0886857	-0.0181843	-0.224565	0.0135172	-0.210073	0.053486	-0.143771	-0.0268396	-0.115304	0.0811128	-0.0835475	-0.0967958
ACTACGCC	-0.0510876	-0.225649	0.0863258	-0.0974015	-0.0824584	-0.00568618	0.456334	0.418286	0.0562304	0.0681876	0.102966	-0.158336	0.0367171	-0.0771156	0.0560639	-0.0302353	-0.0033671	-0.097415	0.0284366	-0.100612	0.34184	0.37098	0.100688	-0.103953	0.302594	0.0489339	0.121734	0.0823201	0.113343	0.104204	-0.103763	-0.0550478	-0.0848449	0.0654927	0.128422	-0.0154044	0.0715481	0.161955	-0.0541148	-0.138828	-0.0380818	-0.200524	0.0970001	-0.14828	-0.0551765	-0.0266211	0.0346771	0.0237587	-0.244855
GCGTAGTA	-0.00513621	-0.146092	-0.27122	-0.253462	-0.173283	-0.286967	0.452966	0.41411	-0.11296	-0.0287752	-0.314691	-0.0757396	-0.104818	-0.107417	-0.239577	-0.291009	0.140142	-0.152724	-0.32204	-0.188941	0.206675	0.132279	-0.0634965	-0.186967	0.301055	0.098419	0.079913	-0.0430755	-0.286646	-0.255284	-0.145469	-0.29393	-0.110958	-0.214813	-0.21463	-0.214448	-0.244009	0.0575886	-0.159688	-0.100612	-0.177728	-0.232148	-0.113549	-0.152143	-0.19431	-0.146725	-0.311407	-0.227491	0.0462336
CTACGTAG	0.0221568	0.0826798	-0.0974362	-0.17986	-0.105948	-0.232698	0.450512	0.408721	-0.0974096	0.0390496	0.039249	0.0485838	-0.173755	-0.171444	-0.131069	-0.0615616	0.048696	0.0406012	-0.00901804	-0.085667	0.335227	0.334794	-0.0625714	-0.00366646	0.357749	0.161177	0.224652	-0.0655329	-0.146597	-0.0922044	-0.00827671	0.072482	-0.206298	-0.0301366	0.14284	0.144028	-0.244612	-0.087448	-0.295468	-0.066618	-0.155909	-0.0519133	0.00944191	-0.105552	-0.107727	-0.0747516	-0.14908	-0.0734989	-0.208249
CCACTACG	-0.0334729	-0.241794	-0.0737373	-0.277211	-0.01495	-0.0881656	0.452867	0.365027	-0.0187557	-0.181248	-0.0651224	-0.2284	-0.102411	-0.160906	-0.0121296	-0.251286	-0.128567	-0.212436	-0.166354	-0.321325	0.321141	0.317416	-0.0886043	-0.158336	0.26711	-0.142829	0.192743	0.165477	-0.091959	-0.233536	-0.322475	-0.266959	-0.229671	-0.159688	-0.13851	-0.184466	0.0374603	-0.1266	-0.255752	-0.305899	-0.0775319	-0.2	-0.0818837	-0.239362	-0.356225	-0.231247	-0.171897	-0.229414	-0.266756
GCGTAGCC	0.0687257	-0.138828	-0.00797206	-0.146218	-0.000336532	-0.178516	0.451101	0.33494	0.156175	-0.132239	0.0338859	-0.0770956	-0.136151	-0.250169	-0.00719039	-0.16038	0.0202714	-0.0183987	0.0155284	-0.186646	0.290903	0.269877	0.0788489	-0.120971	0.301131	0.0071017	0.202128	0.275031	0.00612764	-0.240782	-0.0438246	-0.242366	-0.0178859	-0.17122	-0.0147515	-0.173755	-0.0279301	-0.106349	0.0900594	-0.0820977	-0.0835516	0.0112738	-0.00293756	-0.0998729	-0.0568082	-0.21261	0.158078	-0.125259	-0.0747171
AAGCTACG	0.0580287	-0.0944725	-0.0273038	0.0526706	0.102525	-0.121396	0.455864	0.297799	0.16258	0.177804	0.0726867	0.00895565	-0.0582432	-0.0604841	0.0294001	-0.192445	0.116359	-0.164975	0.0855843	-0.13279	0.25404	0.19888	-0.0250016	0.0636516	0.410709	-0.0836651	0.128178	0.301382	0.169663	0.16092	-0.132514	-0.264207	0.0460012	-0.17167	-0.0382685	-0.252143	0.22285	0.267847	-0.00197725	-0.182391	0.183297	-0.0686806	0.111127	-0.16968	0.0402349	-0.0882838	0.0588053	-0.0628951	-0.0366127
CGCACTAC	0.147586	-0.0883196	-0.328735	-0.220273	-0.268403	-0.00101841	0.451125	0.318279	0.251512	0.205377	-0.231158	-0.265758	-0.28041	-0.175449	-0.165758	-0.144977	-0.170333	0.00685573	-0.253018	-0.0770633	0.385988	0.347695	-0.270774	0.0035913	0.413906	0.0405082	0.319235	0.120127	-0.156864	0.00936132	-0.224565	-0.0770482	-0.0678319	0.0121788	-0.265561	-0.00112003	-0.046228	-0.204144	-0.104624	-0.0600221	-0.080583	-0.0318146	-0.215739	-0.0881438	-0.214026	0.0122049	-0.291721	-0.031219	-0.179588
ATCGTAGC	7.81027e-05	0.0198698	-0.0899664	-0.0844889	0.0506157	-0.14168	0.454404	0.377896	0.132551	0.0227493	-0.198297	-0.194692	-0.1266	0.0190452	-0.144249	-0.253165	-0.0655568	-0.076051	-0.139041	-0.0972434	0.395264	0.333313	-0.0558186	-0.0619017	0.401012	0.0305653	0.339731	0.2873	0.0117085	-0.13536	-0.0805655	-0.117328	-0.0968369	-0.122257	-0.0266457	-0.229414	0.0221214	0.0302776	-0.0248761	-0.0621384	-0.00191893	-0.0157817	0.093698	-0.133724	0.0739772	-0.0647077	-0.00718962	-0.128988	0.0546492
CGACTACG	-0.132698	0.00986576	-0.0784794	-0.0131273	0.0966021	0.154378	0.453383	0.407986	0.11679	-0.0919294	-0.130892	0.0790907	-0.0153032	-0.0222101	-0.0236407	0.0930193	-0.017684	0.0653225	0.0112112	0.0409353	0.39452	0.394638	-0.0557872	0.0592453	0.436192	0.123023	0.342252	0.197167	0.0748862	0.066766	-0.0227684	-0.0807235	-0.0216539	-0.0285858	-0.187615	-0.0257771	0.0593031	0.136662	0.041474	-0.0223688	-0.118509	-0.189963	-0.0412341	0.0518178	-0.0430569	0.0254644	0.0657545	-0.0977316	0.120152
ACTACGAG	0.290748	0.0176115	-0.177211	-0.26517	0.0282585	-0.224565	0.474392	0.362014	0.268221	0.0628921	0.0202839	-0.227165	-0.0858328	-0.239903	-0.141341	-0.188273	0.0403097	-0.116304	0.0539412	-0.134104	0.414098	0.393302	-0.168403	-0.103292	0.45013	0.0672896	0.380563	0.319093	-0.0203068	-0.272125	-0.0801904	-0.21107	-0.0573134	-0.234294	-0.179588	-0.21798	-0.0805128	-0.254516	0.00344155	-0.142713	-0.191721	-0.297881	-0.0193346	-0.248812	-0.194692	-0.205502	-0.174232	-0.130539	-0.137779
GGCTACGA	0.00516907	0.0277788	0.100118	-0.0569959	0.0851719	-0.0933052	0.458565	0.428587	0.207206	0.0426751	0.200803	0.0893743	0.186739	0.270712	0.065833	0.0549562	0.0526797	0.165053	-0.0761064	-0.014695	0.345322	0.414027	0.101511	0.0608516	0.443395	0.320168	0.383143	0.340997	0.0125759	0.188286	0.236196	-0.061732	-0.000870037	-0.0327817	-0.0944664	-0.145223	-0.0563993	-0.0475717	0.0637373	-0.0930876	0.0742905	-0.170997	-0.00180347	0.0537649	0.212429	0.0644647	0.0558892	-0.00227182	0.197505
CAGACTAC	-0.106651	-0.0794387	-0.129757	0.0746212	0.12	0.272388	0.450401	0.432059	0.116751	0.23015	-0.25817	0.0981215	-0.0600943	-0.101055	-0.166154	0.139317	-0.049585	0.0692124	-0.104383	-0.0120713	0.342891	0.396988	-0.0591687	0.0559935	0.416288	0.274887	0.386694	0.247648	-0.235262	0.194715	-0.100656	0.0389479	-0.16968	0.0870179	-0.254975	0.00918164	-0.305453	-0.0834883	-0.136856	0.103777	-0.164397	-0.186646	0.212304	0.108285	0.178403	0.200443	-0.123657	0.0400883	0.0303665
AAGACTAC	0.0440316	0.166702	0.231683	0.245494	0.0701321	0.107247	0.452694	0.374583	0.343962	0.216618	0.321237	0.132141	0.0766304	0.0627264	0.251109	0.29639	0.17899	0.189387	0.136354	0.13264	0.411462	0.410621	0.210261	0.226794	0.416597	0.300168	0.380052	0.410423	0.266436	0.261625	0.0726084	0.115472	0.125135	0.211819	0.0901301	0.112974	0.240983	0.148143	0.22387	0.289235	0.28926	0.0655997	0.138146	0.342807	0.229316	0.25781	0.11916	0.19206	0.0995665
GTAGTATA	0.161124	0.144095	0.0502434	0.0906731	0.0109246	0.0233449	0.456947	0.382954	0.413652	0.327853	0.107588	0.0875496	0.120042	-0.0573432	0.102184	0.232878	0.0307139	0.215721	-0.135164	0.107114	0.406355	0.35013	0.0579936	0.232585	0.389743	0.351124	0.369275	0.357686	-0.0528667	0.0961269	-0.00841808	0.172024	-0.104479	0.231582	0.0686075	0.240563	0.0152369	0.045285	-0.040248	0.23087	0.126811	0.106668	-0.0601525	0.191651	-0.0234659	0.211123	0.0170637	0.138345	-0.0948408
AATCGTAG	0.303005	0.312857	0.296891	0.18596	0.181342	-0.0945084	0.456025	0.419774	0.321863	0.128662	0.321546	0.234206	0.166529	0.182455	0.290817	0.260576	0.202945	0.292806	0.264994	0.20143	0.383432	0.346762	0.284934	0.240504	0.288665	0.253644	0.267298	0.32081	0.329799	0.192586	0.169424	0.039882	0.292095	0.232451	0.186443	0.233546	0.29678	0.0111066	0.274132	0.251494	0.321574	0.170966	0.142053	0.226329	0.203858	0.120541	0.256426	0.0403687	0.218614
ATGTTACA	-0.112668	0.108166	0.0293359	-0.00149397	-0.035762	-0.0528802	0.469817	0.441829	0.0515865	0.029988	-0.0298687	0.051777	-0.170333	-0.112033	-0.128233	-0.00594845	0.00137735	0.0470126	0.0201477	0.000115239	0.41413	0.38907	0.107006	0.0189548	0.374052	0.10714	0.187861	0.114572	0.0890105	0.029988	-0.220135	0.132604	0.062894	0.0605502	0.000875172	0.00897663	-0.0236367	-0.166354	-0.119111	-0.0994266	-0.0165956	-0.0132275	0.0604812	0.115217	-0.116241	-0.10804	-0.0449983	0.01296	0.032892
AACGTAGT	-0.0249809	-0.127901	0.049653	-0.0495456	0.0562973	0.0260584	0.471112	0.429452	0.0270395	0.0566941	0.0298163	0.0792061	-0.0557362	-0.034134	0.104802	-0.140012	0.0346624	-0.13851	0.0651459	-0.082401	0.399792	0.377603	0.0836732	-0.0594292	0.406085	0.117978	0.182895	0.169463	0.124633	0.0867291	0.0763146	0.070061	0.0995251	0.0491593	0.0678468	0.0683982	0.0542843	-0.0772965	-0.0573892	-0.112668	-0.0943946	-0.118111	0.234189	-0.0686204	-0.0339568	-0.0701737	-0.120621	0.0774121	-0.0056103
ACTACGCG	0.189402	0.0330045	-0.021507	-0.0946879	0.0921624	-0.180967	0.47428	0.445605	0.0966945	0.140016	0.0679509	0.126294	-0.0973728	-0.0718755	-0.055812	-0.0152652	-0.103058	0.222194	-0.0417014	-0.100745	0.414046	0.402715	-0.0595678	0.0787733	0.425355	0.199795	0.341713	0.175112	0.157379	-0.0168741	-0.0743407	-0.0485973	-0.0836746	-0.0663286	-0.0813914	0.129739	0.0792114	0.0147734	0.086104	0.135887	0.00101472	-0.056919	-0.0434909	0.030975	-0.0618677	-0.200393	-0.00978529	-0.0288931	-0.152871
ACTACGAC	0.147271	0.0163634	-0.0021384	-0.166756	-0.14437	0.0144186	0.479641	0.452419	-0.17122	0.070265	-0.103386	-0.0603299	-0.0569328	0.00372464	0.0468076	-0.179048	0.0843061	-0.00256316	0.0331158	-0.128735	0.272872	0.388834	0.110131	-0.107883	0.391448	0.0788409	0.213402	0.112556	-0.227984	0.0955674	-0.0893765	-0.0691515	-0.135067	-0.0701195	0.170432	-0.114509	-0.108513	0.173431	-0.119654	-0.0429029	-0.20013	-0.188606	0.00767849	-0.0767774	-0.0636418	-0.120412	-0.180134	-0.101323	-0.0584399
ACTACGCA	0.120436	0.0076199	-0.13098	-0.150724	-0.298716	-0.282681	0.474807	0.469573	0.038447	0.0547993	-0.273518	0.0780701	-0.242713	-0.104528	-0.123958	-0.201818	0.00307883	-0.0183967	-0.145346	-0.173755	0.316047	0.402192	-0.19431	-0.229158	0.370181	0.125569	0.369231	0.120385	-0.185699	-0.102045	-0.268825	-0.167985	-0.234582	-0.0572386	-0.166354	-0.153018	-0.244009	-0.0578314	-0.058572	-0.186967	-0.195468	-0.194692	-0.128819	-0.149349	-0.268825	-0.0996548	-0.0768288	-0.246218	-0.185387
AGGCTACG	0.379196	0.371466	0.143182	0.1276	-0.117783	-0.338828	0.484274	0.470427	0.109367	0.0782909	0.0343498	0.189948	-0.0713198	0.0865675	0.280564	0.197375	0.415229	0.24573	0.297232	0.240379	0.35408	0.392008	0.0340795	0.0854271	0.400722	0.275974	0.437222	0.303012	-0.0677132	0.0520637	0.130275	0.00799616	-0.0287188	-0.040405	-0.0519516	-0.212668	-0.0675179	-0.196257	0.0923568	-0.000169968	-0.0910784	-0.242597	0.0456559	0.0756701	0.0142126	-0.0518632	0.0279605	-0.0178911	0.230416
GTAGTCAC	-0.0153405	0.202676	0.0959957	-0.0775902	0.142387	-0.257675	0.488383	0.472204	-0.0289446	0.0923165	0.0691627	0.131777	0.24107	0.114413	0.189924	0.109582	0.349142	-0.0128453	0.192417	0.0435264	0.404682	0.38461	0.0992409	-0.0256268	0.440328	0.168527	0.405904	0.214757	0.026098	-0.0750528	-0.100043	-0.0763967	0.0698313	-0.0780738	-0.103198	-0.0781181	-0.036508	-0.127246	0.103004	-0.026464	-0.108778	-0.207417	0.0393502	0.0533843	0.0798837	-0.043052	0.0182719	-0.0504685	0.160736
CGTAGTCA	0.0960629	0.139483	0.211411	0.121284	0.184719	-0.149757	0.472409	0.473515	0.240936	0.192035	0.221083	0.199889	-0.0680546	-0.110624	0.127602	0.198705	0.232383	0.136024	0.167772	0.105741	0.42246	0.451854	0.196302	0.228541	0.457519	0.357804	0.413867	0.371498	0.224724	0.244179	0.100438	0.0675564	0.240257	0.236062	0.134475	0.200161	0.266335	0.240299	0.164134	0.145569	0.1271	-0.0887231	0.128223	0.258909	0.021174	0.0514638	0.131776	0.112678	0.0894105
GTAGTGTA	-0.0298059	0.0343019	0.0759523	0.115876	0.117807	0.0323115	0.478882	0.45417	0.151605	0.198613	0.0785757	0.175269	0.0627875	0.0110863	0.0678854	0.108476	0.0589673	0.09597	0.060506	0.094274	0.445823	0.404749	0.173581	0.121077	0.468249	0.285449	0.427041	0.306778	0.0629921	0.192101	0.240584	0.0592463	0.0100511	0.0909288	-0.0479657	-0.0886943	0.0246119	0.109121	0.100216	0.115266	0.012726	-0.0904925	0.0856923	0.19967	0.242245	0.297241	-0.0292308	0.00603926	0.175838
GTAGTCTA	0.337863	0.391558	0.20505	0.261273	0.00510521	-0.107988	0.4813	0.469985	0.229699	0.0705237	0.171704	0.318049	0.144377	0.0244113	0.212306	0.36204	0.0409444	0.225789	0.145354	0.266993	0.411228	0.380758	0.18135	0.234613	0.469983	0.307098	0.442429	0.341126	0.146192	0.218504	0.0230061	-0.0452718	0.106928	0.0533029	0.1169	0.118477	0.137474	0.0578429	0.0583951	0.134219	0.216301	0.00593756	0.130303	0.132516	0.0579922	0.0598666	0.100282	-0.00438162	-0.0223827
CACACTAC	0.19134	0.0998595	0.0856311	-0.0774701	0.237884	0.0408763	0.49192	0.482596	0.327632	0.109297	-0.0760891	-0.0318284	0.156759	-0.106148	0.0138968	-0.0314744	0.00206956	-0.0462579	-0.0182207	-0.016743	0.441269	0.424946	0.0846756	0.0302079	0.471489	0.197924	0.437479	0.292409	0.0923637	-0.0712926	0.0286939	-0.144855	0.0324222	-0.0264098	-0.0280487	-0.11152	0.0668451	-0.0915924	0.116462	-0.0587472	-0.0149171	-0.149485	0.23377	0.0529704	0.101149	0.0724385	0.127457	-0.152143	0.0353039
GACTACGA	0.0652679	0.147715	0.0766356	0.051532	0.0885608	-0.000588398	0.486094	0.486274	0.402855	0.200787	-0.110958	0.171166	-0.0283462	-0.12426	0.015582	0.132037	0.0347793	-0.00645184	0.0226681	-0.0192902	0.463496	0.47523	0.0350248	0.215442	0.471183	0.226898	0.444768	0.2719	0.0374915	0.127984	0.119678	-0.0615156	0.322728	0.132606	0.200272	0.0278021	0.0703247	0.081843	0.0754867	0.194815	0.0395342	-0.052822	0.0664445	0.222168	0.18517	0.134152	-0.0153625	0.0536705	0.169981
ACTACGAA	0.107899	-0.0470169	-0.0490371	-0.188606	0.233577	0.137399	0.497565	0.486594	0.202728	0.0126149	0.00919816	-0.075662	-0.218442	-0.136552	-0.0814427	-0.112726	0.0429969	-0.11707	-0.0581601	-0.190309	0.455043	0.445106	0.0425239	-0.156225	0.471309	0.114802	0.285042	0.308282	0.170711	0.0445358	0.135153	-0.130016	0.0493267	-0.00155037	-0.135556	-0.0350313	0.06645	-0.221396	0.0177522	-0.151145	0.0872908	-0.130539	0.162317	-0.0783388	0.157905	0.0462839	-0.0162169	-0.0276337	0.165788
AGACTACG	0.217825	0.138848	0.140167	0.116398	-0.0125932	-0.00163728	0.490958	0.472536	0.41049	0.266484	0.00466485	-0.00149928	0.0203588	-0.101011	-0.020878	0.140812	-0.078285	0.0364607	-0.141908	-0.040299	0.447995	0.420898	0.069316	0.21578	0.461467	0.236655	0.347097	0.272672	-3.7235e-05	0.0277251	-0.0272702	0.0701568	-0.0333281	0.0891389	0.0106306	0.181464	0.0196222	0.132819	0.0599308	0.0720919	-0.0389517	-0.0306321	0.00596819	0.101945	0.1164	0.196403	-0.0548072	0.159643	0.0140515
ACTACGAT	-0.0269209	0.0889065	0.0276764	-0.0123737	-0.165365	0.00672498	0.487806	0.482503	0.135396	0.0784444	-0.0590136	0.118918	-0.123284	-0.127246	-0.0376215	0.147888	0.116501	0.110495	-0.0251022	-0.0412749	0.428565	0.43839	0.0191128	0.245904	0.46598	0.186896	0.396492	0.173686	-0.00976778	0.149131	0.0292097	0.0152325	0.0595816	0.0195241	0.116076	0.194838	-0.0927541	0.142442	-0.0353752	0.0482777	-0.00358899	0.00120147	-0.125493	0.17077	0.0696578	-0.0368236	-0.0850547	0.10941	0.0829576
CACTACGA	0.0408604	0.1952	0.139751	0.156583	-0.0207963	-0.0934536	0.493718	0.493003	0.0394306	-0.063696	0.0391535	0.175741	-0.192082	-0.0815575	-0.0273773	0.107926	0.140351	0.180986	-0.0129041	0.0868886	0.406286	0.416848	0.0398237	0.056948	0.459444	0.242051	0.345374	0.150575	0.119074	0.171861	-0.195861	0.038945	0.100398	-0.0138756	0.117947	0.110803	0.108396	0.0171793	-0.0427025	-0.0118455	0.00442178	-0.133255	0.0395488	0.0820144	-0.105948	-0.031912	-0.158336	0.0332108	-0.0896833
ACACTACG	0.115915	0.0881852	-0.0143698	-0.0490628	0.0372948	0.00675886	0.491694	0.476698	-0.0267024	0.0347785	0.0633612	-0.0351616	0.0904775	-0.0346745	0.0824036	-0.126761	0.156806	-0.0144158	0.134088	-0.0535056	0.398726	0.38536	0.0156456	-0.0401224	0.444658	0.137336	0.334574	0.189633	0.0095801	-0.012267	-0.0441954	-0.0817446	-0.05856	-0.13019	-0.0811052	-0.173993	0.108876	-0.0464422	0.0462771	-0.0151545	-0.0892644	-0.113727	0.0434523	-0.0552058	0.0264294	-0.094292	-0.101055	-0.0713541	0.0760531
GACTACGC	-0.202919	-0.0233953	-0.249214	-0.0179619	-0.256225	-0.242136	0.474109	0.471706	-0.15867	0.091241	-0.225181	-0.0567162	-0.227491	-0.13851	-0.177469	-0.0605692	-0.0874252	-0.0351201	-0.233819	-0.0980942	0.422761	0.40878	-0.106651	-0.0564267	0.395091	0.157174	0.223718	0.0163828	-0.0685954	0.0309173	-0.105651	0.00636234	-0.156864	0.118781	-0.163451	0.0580747	-0.0382831	0.294362	-0.0699759	0.0112236	-0.245717	-0.154516	-0.0867695	0.102947	0.00348806	0.0622722	-0.130892	-0.115739	-0.0974379
ACTACGTA	0.142482	-0.0146613	0.11386	-0.0179477	0.0101129	-0.02404	0.477189	0.461396	0.116731	0.14778	0.154101	0.027679	-0.0667834	-0.0700571	0.0812822	0.0899869	0.104858	0.174735	-0.00629196	-0.0698493	0.425739	0.428635	0.0827902	0.065435	0.413216	0.31324	0.31052	0.220832	0.063449	0.0552043	-0.0242769	0.0390184	0.0297796	0.0212505	-0.105208	-0.042512	0.0552973	-0.00918239	0.138186	0.26216	-0.0316001	-0.0477234	0.00667648	0.164622	0.0395838	-0.0522407	-0.0293154	-0.0838944	0.0288278
ATACTACG	0.0507836	0.0729393	0.166585	0.0166593	0.0413035	-0.161439	0.478184	0.448388	0.193325	0.0452274	0.0513908	-0.0509492	0.0187959	-0.197469	0.0954964	-0.045892	0.119681	0.136328	-0.0333679	-0.0107069	0.441368	0.445882	0.198052	0.130251	0.442209	0.164957	0.282907	0.272236	0.11988	-0.00225581	0.160139	0.0146161	0.0967475	-0.07768	-0.0510862	0.0442984	-0.0276746	-0.0521526	0.0356365	-0.0574189	0.0358408	-0.125571	0.126198	-0.0183456	0.144046	-0.00585224	-0.0012197	-0.00881795	0.1179
AAACTACG	0.0596377	0.0673094	0.0868265	-0.0425928	-0.103858	-0.000924836	0.460713	0.455534	0.393694	0.205302	0.0766428	0.02349	0.0310309	-0.179317	-0.00655515	-0.106601	0.10209	-0.0173439	0.00165997	-0.208302	0.440767	0.449011	0.120513	0.0306233	0.40678	0.105011	0.382878	0.245651	-0.0424184	-0.0549971	0.108653	-0.00248909	0.191099	-0.0609229	0.0852216	-0.0684979	0.0700666	-0.113847	0.0735019	-0.0146593	0.0847362	0.0377643	-0.00348919	0.0196217	0.161386	0.0308624	-0.0238522	-0.0953954	0.15115
ATTCGTAG	0.0779084	0.0486569	-0.08693	0.0201787	0.00561942	-0.109963	0.457936	0.441644	0.32202	0.0523357	0.00810642	0.0283251	-0.089242	0.0213633	-0.022011	0.072628	-0.074102	0.162363	-0.0994206	0.0210466	0.450202	0.434825	-0.0671245	0.0331295	0.44228	0.114784	0.368886	0.222824	-0.00687034	-0.0605625	-0.0618457	-0.0220316	0.016121	0.0170543	-0.16968	0.0681258	0.00926929	0.0268432	0.079384	0.105707	-0.0305592	-0.254516	-0.0481187	0.0479959	-0.0519693	0.126821	-0.128988	0.0808842	0.0293281
AACTACGA	-0.0527555	0.0682972	0.0996423	0.0658957	0.0695254	-0.000849881	0.451279	0.425835	0.314455	0.288883	-0.0300011	0.246793	-0.11261	-0.0835228	-0.00232741	0.100437	-0.190658	0.100395	-0.012201	-0.134872	0.430537	0.4361	-0.0519941	0.130763	0.3976	0.232105	0.33233	0.189129	0.142742	0.15493	-0.040058	-0.0377072	0.0701624	0.133099	-0.100043	0.0281391	0.198679	0.156883	0.109907	0.201245	-0.108145	0.0226592	-0.109745	0.158876	0.0370191	-0.00263365	0.0446424	0.0324318	0.0693379
TACTACGA	0.272086	0.218122	0.182304	0.091215	-0.0394849	-0.0453207	0.45013	0.40398	0.295967	0.32171	0.121898	0.131408	0.024611	-0.0613282	0.0998756	0.119289	0.21774	0.185204	0.0373353	-0.109583	0.4166	0.434922	0.144583	0.188912	0.40145	0.122022	0.423773	0.299514	-0.0656221	0.004218	-0.00264598	-0.00895789	-0.0324559	0.114536	0.0270259	0.0258513	-0.17986	-0.00654243	0.0622782	0.0527289	-0.0294053	0.0579184	-0.0156339	0.107379	-0.0665307	-0.103058	-0.00736406	0.107446	-0.0200604
GCTACGAA	0.302444	0.227678	0.0707408	0.0803091	-0.066303	-0.191009	0.459379	0.437117	0.203186	0.249454	0.25691	0.134659	-0.0162097	-0.058039	0.167714	0.123038	0.169511	0.278414	0.0832179	0.11691	0.482736	0.486084	0.239104	0.244467	0.488602	0.357565	0.486482	0.432231	0.141698	0.0415102	0.18848	0.0931936	0.204453	0.0201733	0.209358	-0.00341255	0.0869288	0.0872687	0.146957	0.0920328	0.162759	-0.159346	0.167061	0.0680174	0.00145327	0.144294	0.118684	0.0480664	0.00931586
ACTACACA	0.0551127	0.273774	0.140533	0.184566	-0.103905	0.164498	0.444084	0.431513	0.0136688	0.248458	0.00434586	0.210916	-0.187943	-0.0431058	0.17394	0.150381	0.177578	0.317268	0.0130748	0.159489	0.479378	0.481747	0.199264	0.297266	0.485694	0.44783	0.48302	0.457857	0.127488	0.244498	-0.0359642	0.17658	0.0335819	0.142032	-0.164016	0.178217	0.15463	0.219934	0.0426117	0.204511	-0.0487373	-0.0584037	-0.0704472	0.254365	-0.0638231	0.213559	-0.0132811	0.0679311	-0.0112323
ACTACACG	0.1763	0.248079	0.0739417	0.177068	-0.0485019	0.0111473	0.431553	0.457672	0.101127	0.26573	-0.131336	0.176442	-0.0422799	0.0651318	0.0603432	0.207137	0.178898	0.0803009	0.0400631	0.232711	0.483899	0.490142	0.25463	0.3632	0.49165	0.463756	0.488702	0.434859	0.0559332	0.230422	-0.0320543	0.136446	0.0789082	0.14067	0.0576967	0.164537	0.09833	0.25354	0.00278305	0.182548	-0.0889905	0.0572159	0.0744433	0.201846	0.106459	0.192145	-0.00864304	0.0462538	0.044255
ACTACACT	0.205994	0.27822	-0.095499	0.198848	0.0657162	0.158022	0.469498	0.469467	0.339899	0.257969	0.0445335	0.286131	-0.00305128	0.0723205	0.0567055	0.283148	0.0138389	0.0411247	0.102341	0.204316	0.453463	0.485897	0.112891	0.295657	0.488076	0.434549	0.486797	0.443889	0.124638	0.26118	0.043527	0.10781	0.0757383	0.299515	0.142434	0.286579	0.139527	0.205658	-0.0426335	0.236429	0.0930774	0.00123495	0.190079	0.149202	-0.0619883	0.133598	0.137578	0.231059	0.0639662
ACACTACA	-0.146344	0.0546076	0.141126	-0.0482819	-0.0596403	-0.0568373	0.478871	0.454594	0.325008	0.247232	0.124117	0.130139	0.132518	-0.0999713	-0.0282982	0.0183351	0.240537	0.161154	-0.138091	0.0594032	0.485898	0.488893	0.265559	0.155178	0.497402	0.438224	0.493427	0.479547	-0.196257	0.152411	0.113655	-0.0128557	-0.0639276	-0.0790254	-0.197881	-0.182681	-0.150031	0.064234	-0.0558905	0.0683004	-0.1266	-0.302228	0.0129027	0.135014	0.110917	0.1388	-0.00722074	-0.0743583	0.131858
AGACTACA	0.208904	0.247593	0.0339822	0.109389	-0.0795961	-0.062985	0.478777	0.461338	0.113836	0.299135	0.142311	0.140308	0.0416202	-0.0615036	0.0693306	-0.000668195	0.299709	0.0465411	-0.0697059	0.0729076	0.475069	0.493159	0.201607	0.267946	0.491556	0.461622	0.495871	0.484097	-0.0677301	0.125427	-0.00082699	0.0209806	-0.0210124	-0.0135186	-0.0630721	-0.123807	0.208284	0.220374	-0.0241292	0.125123	0.0991664	-0.134199	0.0242776	-0.0481882	-0.0237432	0.137715	-0.078745	-0.0831815	0.0434465
GACTACAC	0.218654	0.30387	0.162908	0.0981215	-0.125649	-0.0339938	0.466074	0.462047	0.314889	0.335914	0.103253	0.260173	0.188733	0.245323	0.153006	0.243463	0.295015	0.353004	0.123454	0.162854	0.472667	0.480791	0.208163	0.337883	0.488948	0.459211	0.494023	0.487563	0.0374796	0.258424	0.0575879	0.0799166	0.0314833	0.208279	-0.0780104	0.0517906	0.1397	0.138377	0.0450533	0.23314	0.1867	0.124599	0.128778	0.298145	0.16974	0.184722	-0.00547737	0.147018	0.210656
TGACTACA	-0.115428	0.136474	0.261815	0.00747824	0.122516	0.116141	0.455213	0.408361	0.49264	0.458976	0.145707	0.0865413	-0.0155829	0.0762323	0.179868	0.172337	0.205104	0.203735	0.12102	0.0991705	0.486088	0.489037	0.292927	0.222781	0.496508	0.464642	0.495816	0.493845	0.104838	0.132851	0.121261	0.0361585	0.0444742	0.0874043	-0.0446435	-0.0720621	0.0878747	0.179177	0.14391	0.0904203	0.0787537	-0.142946	0.079545	0.0924063	0.194953	0.0805849	0.063205	0.104919	0.246102
GACTACAA	-0.0774166	0.213573	0.203426	0.233956	0.0377789	0.0871631	0.445334	0.393722	0.498576	0.483273	0.244081	0.162569	0.121119	0.138599	0.158681	0.326534	0.224437	0.177508	0.223005	0.277989	0.490862	0.492873	0.274444	0.264755	0.495992	0.414765	0.492184	0.494243	0.125056	0.00958407	0.022573	0.0531998	0.0744503	0.115199	0.132442	0.216726	0.176378	0.165469	0.177051	0.187005	0.180522	-0.0108567	0.130041	0.0604593	0.104936	0.0403266	0.163277	0.217435	0.170757
ACTACAAA	0.0058371	0.213178	0.206196	0.159855	0.0630402	0.0860009	0.442279	0.406713	0.498674	0.481611	0.124344	0.282691	0.136744	0.0647901	0.23822	0.279388	0.184267	0.238004	0.109579	0.168833	0.488421	0.488296	0.305595	0.326647	0.495656	0.437457	0.488357	0.491527	0.193102	0.0963796	0.143409	0.148491	0.257962	0.221172	0.18928	0.171867	0.161704	0.138525	0.140674	0.271955	0.0771246	0.0594642	0.0334263	0.261139	0.208246	0.252457	0.173524	0.15834	0.14169
ACTACAAT	-0.235952	0.196036	-0.023364	0.0939332	-0.238616	-0.159688	0.337093	0.31617	0.493002	0.481199	0.0557559	0.167863	-0.168613	0.0210968	-0.0338227	0.174705	0.0487106	0.0685073	0.0165783	0.166015	0.470071	0.470202	0.121979	0.174101	0.480681	0.284202	0.489451	0.468231	-0.0368904	0.0604953	-0.149214	-0.0668085	0.0190967	0.0203243	0.092987	0.156013	-0.117198	-0.120971	-0.0392787	-0.0558602	-0.0275242	0.0290182	-0.0850501	0.113235	-0.12993	-0.0306881	-0.0881097	-0.0458517	0.0187463
ATTGTAGC	0.0293578	0.251626	0.235391	0.128774	-0.0503617	-0.157675	0.348117	0.357032	0.493667	0.46497	0.185829	0.275808	0.0988876	-0.0925978	0.115449	0.142401	0.115851	0.0337219	-0.0509362	0.183531	0.476246	0.478735	0.237606	0.187238	0.477641	0.294533	0.47939	0.46274	0.0175215	-0.0833049	0.0710605	-0.0294692	0.132753	0.165277	0.151638	0.130932	0.0688708	-0.129414	0.275284	0.142112	0.244114	0.0402075	0.100848	0.156417	0.187195	0.0709056	0.134077	0.0117884	0.119538
ATTTGTAG	0.0106072	0.0862148	0.138441	0.176708	0.0523581	0.0483027	0.307749	0.302504	0.492667	0.45518	0.160908	0.18763	-0.105552	-0.0917387	0.0607986	0.101392	-0.0316603	0.187765	-0.0240651	0.0905728	0.472786	0.48183	0.112623	0.272201	0.474251	0.341179	0.479821	0.452866	0.179359	0.125228	-0.0373167	0.0324115	0.0369537	-0.00608683	0.00129506	0.0146408	0.223677	0.12424	0.166334	0.0654748	0.221257	-0.136051	-0.00122216	0.193646	0.129641	0.052851	0.0716865	-0.026278	0.0854902
TACTACAA	-0.0915953	-0.0206369	-0.0121333	0.0620574	0.0388232	0.0512327	0.314182	0.212507	0.490748	0.409971	0.167382	0.148333	-0.0709407	0.0484782	0.0273242	0.120476	0.226426	0.0820653	0.0904922	-0.0270045	0.476328	0.472042	0.117524	0.168615	0.474634	0.229615	0.47471	0.46829	0.0575075	0.0339503	-0.0567952	-0.110791	0.0565645	0.0543649	0.045372	0.0122979	0.0515865	-0.0194936	0.0544623	0.163902	0.0576418	-0.145469	-0.0446602	0.0934973	-0.111238	0.0336016	0.113617	0.0188462	-0.0015832
CTACAAAC	0.171763	0.157339	0.0681301	0.0742223	-0.0410087	-0.142366	0.389942	0.375231	0.490092	0.444741	0.0347717	0.176151	-0.0389784	0.107678	0.132411	0.205445	0.234514	-0.057183	0.073648	0.276692	0.476627	0.477316	0.234608	0.257464	0.488595	0.320965	0.495414	0.489447	-0.0283382	-0.0221168	0.0276061	-0.238195	0.035326	0.128765	0.0247948	0.0905673	0.141471	0.0665547	0.0896778	0.103474	-0.0173879	-0.154061	0.0392086	0.00554074	-0.0417566	0.107173	-0.0831176	0.0901241	0.0332109
GGCTACAA	0.0903231	0.0743844	-0.017483	0.101308	-0.151428	-0.114509	0.34988	0.242853	0.493727	0.429505	0.0805061	0.222649	-0.112494	0.0236764	-0.11945	0.191065	0.263091	-0.0259601	-0.128067	0.212628	0.478419	0.48569	0.127826	0.167048	0.480978	0.272173	0.493189	0.484378	-0.188273	-0.0553809	-0.287615	-0.14034	0.0594162	0.133437	-0.150864	0.0929278	-0.137469	-0.110958	-0.0220899	0.0283599	0.0454564	0.0375474	-0.166154	0.15122	-0.06439	0.0925835	-0.237161	0.0625292	-0.0756481
GCTACAAA	-0.0399622	0.233029	0.207509	0.242685	-0.0320334	0.0721284	0.411837	0.385286	0.495665	0.323539	0.22569	0.223268	0.174293	0.0980661	0.158117	0.258768	0.194543	0.176796	0.170399	0.272801	0.487183	0.491778	0.231131	0.308506	0.491807	0.412594	0.486476	0.488073	0.155686	0.0978177	0.168241	0.140275	0.138837	0.184658	0.0969758	0.208457	0.20463	0.214041	0.164742	0.275607	-0.00835961	0.00579596	0.0872636	0.257736	0.261963	0.201674	0.134276	0.157616	0.0617325
AACTACAA	0.0938074	0.110699	0.0360875	0.173914	-0.0360029	0.0482612	0.423167	0.380793	0.482558	0.395113	-0.0522478	0.217192	-0.0884862	0.0642344	0.0732707	0.239978	0.151024	0.10798	0.0626826	0.130746	0.467729	0.485667	0.105031	0.255897	0.493609	0.438218	0.484555	0.464713	-0.0358247	0.0344135	-0.0570682	0.0439801	0.0615892	0.166776	0.191621	0.214245	-0.0270103	0.15991	-0.0327809	0.268557	0.0542521	0.0930427	0.0301198	0.111053	-0.0677297	0.0506748	0.0720123	0.124918	0.014942
CACTACAA	0.0472842	0.113906	0.196828	0.142063	0.148687	-0.0380058	0.424503	0.363762	0.477697	0.357969	0.179183	0.159726	0.151333	0.101872	0.165946	0.23952	0.332356	0.213624	0.221385	0.133573	0.484422	0.475793	0.320835	0.241542	0.485925	0.404809	0.454148	0.439137	0.134961	0.0734223	0.145149	0.187202	0.2126	0.250799	0.146627	0.256199	0.222262	0.20467	0.155634	0.187383	0.069513	0.0177026	0.104152	0.199863	0.184893	0.219225	0.173552	0.10036	0.208598
AATGTAGT	0.254455	0.15837	0.179306	0.213669	-0.02179	-0.018571	0.403474	0.38434	0.474987	0.418507	0.133033	0.259406	0.059287	0.0536649	0.191211	0.231329	0.184349	0.176555	0.11496	0.237624	0.474079	0.490746	0.0500624	0.369905	0.486684	0.432898	0.49332	0.447473	0.0658256	0.243268	0.0504478	0.0166577	0.00163425	0.120603	0.116467	0.146423	0.134259	0.158797	0.153048	0.183155	0.129421	0.00915695	0.0633745	0.223144	0.0249432	0.154818	-0.000212411	-0.00292576	0.011053
ACTACAAC	-0.149485	0.0153923	-0.0020489	0.0737597	-0.210902	-0.0751115	0.335356	0.226913	0.460095	0.380177	-0.116368	0.112981	-0.119654	-0.0562524	-0.0195278	0.0165952	-0.0121182	0.0691761	-0.145346	-0.0159429	0.472289	0.45793	-0.0648716	0.0314834	0.470513	0.171713	0.488683	0.461375	-0.158004	-0.1451	-0.324489	-0.133819	-0.0669085	0.0179202	-0.182681	-0.0525431	-0.228483	-0.244009	0.0506167	0.0475281	-0.106753	-0.146597	-0.216304	0.158338	-0.244249	-0.00951725	-0.105998	-0.00244795	-0.194692
AGCTACAA	0.11534	0.088459	0.0669121	-0.029775	0.0995555	-0.00817484	0.384504	0.276218	0.398725	0.2994	0.120171	-0.0287333	-0.193181	-0.22815	0.125535	0.0212543	0.256178	-0.0256577	-0.0149598	-0.0256606	0.463459	0.479617	0.200003	0.14945	0.485876	0.378305	0.493573	0.480201	0.0839172	-0.0715181	0.0981677	-0.0468584	0.0610321	0.0338704	0.0758379	-0.0401203	0.027442	0.223714	0.0557265	0.117044	0.177195	-0.0231502	0.0174582	-0.0862595	0.0453194	0.0430666	0.0200131	-0.0465393	0.0560836
CGACTACA	0.110536	-0.123582	0.00563098	-0.170333	-0.174232	-0.400218	0.44465	0.339616	0.409576	0.213766	-0.0395555	-0.0267676	-0.254212	-0.0229853	-0.0119742	-0.0407734	-0.0395941	0.0563383	-0.0429161	0.00231063	0.47551	0.467645	0.190625	0.11099	0.487202	0.33774	0.493672	0.482867	-0.0854117	-0.274473	-0.155752	-0.416052	-0.0721585	-0.227491	-0.14034	-0.298716	-0.0297473	-0.2057	0.147976	-0.0496355	-0.0560023	-0.334008	-0.102826	-0.226761	-0.0123114	-0.18041	0.00205303	-0.230627	-0.0793976
AGGCTACA	0.246022	0.175903	-0.127901	-0.0226689	-0.00346017	-0.164975	0.339931	0.111233	0.234161	0.192566	0.0936761	0.0278224	-0.179588	-0.0136752	-0.0390383	0.0456453	0.164555	-0.00671043	0.0642058	0.106992	0.472123	0.471107	-0.137882	0.0946813	0.475104	0.290066	0.490304	0.485694	-0.0943316	-0.122185	-0.262709	-0.172584	-0.0403521	-0.119111	-0.186646	-0.0980091	-0.00113046	0.0278574	0.0308074	-0.0461858	-0.176955	-0.28041	-0.10575	0.0171153	-0.171444	-0.108302	-0.0509446	-0.0326268	-0.165365
CGGCTACA	0.237982	0.0921665	0.0958658	-0.133724	-0.145967	-0.227491	0.404023	0.268367	-0.00607359	-0.0231183	0.117062	-0.134008	-0.123958	-0.100789	0.03822	-0.167366	0.119786	-0.0287493	-0.0314189	-0.118842	0.450311	0.461452	0.116332	0.0104383	0.473995	0.244477	0.493085	0.481673	-0.0969271	-0.20716	-0.103858	-0.313018	-0.0415312	-0.251004	-0.120135	-0.274232	0.011672	-0.249757	-0.024444	-0.176447	-0.0771456	-0.358838	-0.0626735	-0.20575	-0.0581135	-0.175203	-0.102503	-0.125181	-0.0752341
GGCTACAC	-0.0697537	-0.0879173	0.0925798	-0.0526796	-0.049466	-0.0764002	0.355271	0.251663	0.408589	0.39082	0.145876	0.0674429	-0.0533036	-0.0959299	0.0526531	-0.0661615	0.031716	0.0308878	-0.147496	-0.200877	0.415157	0.438599	0.173755	-0.0197362	0.455424	0.253702	0.449751	0.366875	0.0955516	0.0670943	0.0850856	-0.0561795	0.13001	-0.0236994	0.172477	-0.0183938	0.0402996	-0.01807	0.129853	0.0594293	-0.0206377	0.0386951	-0.0805985	-0.0499725	0.0427645	0.0191285	0.0045648	-0.0114465	0.159352
CATTGTAG	0.0850602	0.132001	0.0361208	0.115981	0.105664	0.0295012	0.291351	0.251221	0.435893	0.348373	0.013418	0.153644	0.00873732	-0.0267267	0.135684	0.183725	-0.00628965	0.137635	0.092368	0.203136	0.438641	0.449653	0.0143523	0.248908	0.459122	0.299963	0.472606	0.396412	-0.0524762	0.0156535	-0.0877551	0.0439664	-0.00593023	0.089755	-0.051913	0.122365	0.0919564	0.0631188	0.0419137	0.143299	-0.0746822	-0.058953	0.0420261	0.233007	-0.107469	0.166509	-0.00241369	-0.0125648	-0.18041
AGTTGTAG	-0.000854709	0.0153328	-0.0453034	-0.0927897	-0.0693431	-0.0805297	0.280054	0.231425	0.482222	0.32563	-0.000158372	-0.0883704	-0.198716	-0.156864	-0.0990086	-0.129843	0.0724824	-0.00925865	0.0919549	-0.0698384	0.461064	0.434842	0.0960848	0.049899	0.468617	0.119828	0.473202	0.436906	-0.160555	-0.01942	-0.220343	-0.199568	-0.092352	0.0304316	-0.178516	0.0727747	-0.192812	-0.145842	0.0588272	-0.211805	-0.00446779	-0.0587029	-0.19393	-0.0323202	-0.0137946	-0.0793641	-0.113787	-0.00113746	-0.0613945
CGCTACAA	0.0130851	0.120292	-0.0260673	0.200064	-0.0342803	-0.0281696	0.288235	0.230394	0.482056	0.449472	0.0378349	0.112772	-0.0883957	0.00579018	0.197036	0.197164	0.0735072	-0.0116206	-0.0664727	0.22225	0.422627	0.450431	0.0591279	0.222319	0.454144	0.256755	0.463834	0.419335	0.133053	0.0431143	-0.0761159	0.0797742	0.00520499	0.241621	-0.0519967	0.130947	-0.0352204	-0.0444039	0.0643862	0.121501	-0.0495943	0.139025	0.0578127	0.139085	-0.0600169	0.130982	0.0286819	0.207404	-0.100174
CTACAATC	0.0216893	0.198729	0.112476	0.210257	-0.173993	-0.129843	0.303152	0.295162	0.496409	0.48236	-0.0151179	0.252781	-0.192445	-0.0160256	0.00465174	0.229907	0.175657	0.0864295	0.0644679	0.197238	0.443315	0.464183	0.136939	0.246935	0.46744	0.322658	0.464575	0.410373	-0.0271009	0.0791989	0.0936877	0.211362	0.226237	0.19999	-0.00646484	0.290464	-0.0524141	0.0197226	0.130396	0.112543	0.104482	-0.00281696	-0.125414	0.191237	0.00998104	0.146316	-0.128483	0.152796	-0.108672
AATTGTAG	0.0602447	0.00288152	-0.0487218	0.0933418	-0.150724	-0.0711259	0.229597	0.143672	0.481174	0.413947	0.0638402	0.10742	-0.0195161	-0.198716	-0.0411955	0.212295	0.19723	0.0997333	0.0131566	0.0479717	0.459834	0.475219	0.0367547	-0.00194295	0.454681	0.378499	0.452159	0.429858	0.030492	-0.222475	-0.0577031	0.0462661	0.0956118	0.1578	0.0302993	0.164833	0.00796113	-0.104383	-0.0961535	0.0101264	-0.027479	0.0248524	-0.0299578	0.142981	-0.0658647	0.0402451	-0.0155814	0.118002	0.0104457
CTACAAAA	-0.0502653	0.234462	0.227041	0.24267	0.0117012	-0.0349651	0.3082	0.355337	0.49212	0.404614	0.0813026	0.260738	-0.00206784	0.172261	0.0848295	0.306184	0.119579	0.1826	0.0292249	0.193566	0.466226	0.456591	0.169175	0.265288	0.438073	0.269564	0.389586	0.411933	0.195075	0.163714	0.0940352	0.134723	0.377375	0.345707	0.21994	0.30914	0.241045	0.164979	0.274206	0.182551	0.229673	0.119245	0.202815	0.314901	0.220251	0.164254	0.141955	0.129735	0.123164
AATTTGTA	-0.00526192	0.0490186	0.311029	0.232043	0.12637	0.118872	0.107839	0.255486	0.483974	0.299147	0.191928	0.142522	0.17742	0.119393	0.279438	0.337551	0.152253	0.159537	0.171473	0.192006	0.467697	0.446964	0.257548	0.28398	0.412446	0.248672	0.282385	0.286063	0.272939	0.119649	0.147964	0.0784485	0.310991	0.263099	0.170366	0.313259	0.197615	0.103553	0.311639	0.17884	0.143306	0.126633	-0.0431589	0.245048	0.271862	0.223568	0.28239	0.263015	0.123416
AATACAAA	0.0796664	0.205894	0.287465	0.15598	0.153218	0.00612643	0.289754	0.280992	0.478298	0.30301	0.275792	0.238088	0.0507987	0.133227	0.268311	0.234876	0.281241	0.266981	0.205044	0.194943	0.472744	0.465232	0.293168	0.260751	0.419145	0.277987	0.388094	0.354819	0.305817	0.228232	0.0816795	0.156734	0.325379	0.247967	0.224576	0.114656	0.383299	0.161348	0.16595	0.228191	0.0732454	0.0827437	0.0887609	0.204101	0.197574	0.162442	0.22807	0.194398	0.117965
AGTTTGTA	0.0813289	0.169272	0.263862	0.193711	0.101086	0.0971438	0.159178	0.301212	0.477408	0.423572	0.218213	0.206391	0.0283563	0.045285	0.180046	0.240205	0.23707	0.137046	0.185191	0.212359	0.460883	0.455992	0.205374	0.261773	0.399112	0.161145	0.402413	0.271846	0.134563	0.126958	-0.0200339	0.137871	0.234838	0.367564	-0.0371328	0.120441	0.183347	0.166217	0.0789786	0.242208	0.202809	0.222863	0.101606	0.242981	0.228126	0.184611	0.118843	0.132018	0.00571303
GATACAAA	0.164759	0.164934	0.294545	0.306601	-0.0366919	0.163914	0.263424	0.320801	0.462704	0.459551	0.0745582	0.218574	0.0758706	0.0908065	0.157724	0.250597	0.0883623	0.230606	0.0647015	0.196973	0.460894	0.459486	0.230475	0.289752	0.395526	0.359111	0.397983	0.301777	0.126934	0.160982	0.0637001	0.0505378	0.197931	0.322289	0.127021	0.169015	0.206377	0.223961	0.230823	0.250463	0.0905491	0.103394	0.155587	0.327447	0.283612	0.248944	0.0562813	0.214207	0.132934
TACAAATA	0.0522069	0.193903	0.227783	0.271839	-0.0419531	0.00593464	0.230362	0.307293	0.470973	0.380737	0.025006	0.138682	0.0919257	0.0248579	0.171436	0.290021	0.2867	0.148889	0.108423	0.193468	0.470944	0.452421	0.141009	0.154594	0.42164	0.302246	0.377437	0.295803	0.190632	0.183098	0.143999	0.171021	0.369778	0.392601	0.140825	0.283287	0.108467	0.224902	0.195043	0.0913443	0.102549	0.166117	0.0282249	0.17055	0.203966	0.222475	0.120702	0.152797	0.172314
ATTTTGTA	-0.0206349	0.101292	0.265405	0.196238	0.110768	-0.00183988	0.159795	0.246465	0.475753	0.334585	0.284531	0.274514	0.127542	0.102716	0.195912	0.253606	0.208256	0.27569	0.0825619	0.293493	0.462599	0.449805	0.245321	0.317101	0.336487	0.272291	0.335427	0.256515	0.27333	0.193501	0.116377	0.202386	0.274516	0.332522	0.0936777	0.22554	0.253933	0.0689982	0.197378	0.31125	0.194623	0.0713968	0.0169425	0.282536	0.153676	0.248472	0.224097	0.234648	0.0406674
ATACAAAC	0.0481349	0.169677	0.29912	0.0411023	0.1754	-0.0598298	0.2986	0.199925	0.476385	0.305616	0.21394	0.0453145	0.14664	-0.0805047	0.256117	0.0299072	0.121127	0.0311528	0.0969013	0.0718532	0.444462	0.430625	0.278514	0.0955405	0.385569	0.219772	0.3163	0.314054	0.279992	0.0574527	0.247129	0.058799	0.367515	0.27582	0.224499	0.128748	0.251843	-0.0493678	0.282644	0.0157114	0.337477	0.0253816	0.245476	0.136379	0.292674	0.192839	0.29035	0.123845	0.262264
GATTTGTA	0.206804	0.102037	0.39021	0.151302	0.0784851	0.112631	0.154288	0.221613	0.48106	0.370324	0.22379	0.09049	0.177668	0.0244607	0.364293	0.272738	0.263906	0.163513	0.302253	0.119463	0.453038	0.426736	0.343198	0.216351	0.414577	0.251032	0.293268	0.270328	0.182033	0.0816483	0.208266	0.0542719	0.355904	0.198031	0.249692	0.19376	0.20177	0.0675592	0.273231	0.192432	0.2316	0.184221	0.216089	0.259233	0.358432	0.186289	0.344609	0.0347319	0.242257
ATACAAAT	0.0974087	0.273739	0.342542	0.338678	0.137632	0.186769	0.186811	0.327545	0.476671	0.382499	0.169449	0.320336	0.16413	0.201749	0.295191	0.371349	0.345587	0.116863	0.282983	0.245241	0.449423	0.437855	0.313672	0.316256	0.383876	0.134041	0.360804	0.369346	0.294745	0.216474	0.0692497	0.101718	0.333349	0.370736	0.175891	0.271906	0.241808	0.156712	0.195944	0.126345	0.202628	0.247164	0.174821	0.34755	0.290441	0.231517	0.24994	0.277752	0.268854
ATACAAAA	-0.139686	0.0358277	0.0471325	0.0938408	-0.0112676	0.0265463	0.163324	0.218798	0.48483	0.435318	0.112362	0.113739	0.0305708	0.06157	-0.00353642	0.113718	-0.0807909	0.202967	0.0139274	0.133028	0.451814	0.436469	0.0751801	0.0935728	0.29338	0.218086	0.249042	0.136796	0.31662	0.322317	0.0430377	0.102389	0.420574	0.417721	0.300301	0.27151	0.377433	0.380741	0.062849	0.170529	0.0955797	0.0443731	0.104052	0.262415	0.310573	0.260268	-0.0781945	0.131374	-0.0363952
AATTGTAC	-0.133724	0.123809	0.243106	0.195867	0.218456	0.0693264	0.268651	0.359009	0.483852	0.416439	0.217327	0.25306	0.0904009	0.17705	0.0961433	0.20824	0.115931	0.17812	-0.0530842	0.190607	0.469697	0.454856	0.243118	0.259531	0.377544	0.300583	0.341865	0.265596	0.319286	0.372714	0.233237	0.178253	0.435754	0.435152	0.243519	0.309285	0.379283	0.369446	0.270108	0.256232	0.244119	0.182375	0.243637	0.358062	0.311145	0.28207	0.172564	0.19543	0.187027
ATTTGTAC	0.197364	0.137637	0.184331	0.196539	-0.00838304	0.155659	0.193586	0.282674	0.463811	0.379921	0.0306147	0.32183	-0.0931095	0.0767423	0.195281	0.172873	0.235361	0.276363	0.175895	0.123188	0.460094	0.441284	0.223507	0.175519	0.359692	0.160673	0.278467	0.26384	0.247792	0.282956	0.281754	0.206368	0.467373	0.452613	0.342684	0.235781	0.366882	0.381807	0.144673	0.11198	0.21725	0.11848	0.301855	0.264357	0.324157	0.279745	0.162371	0.119123	0.210938
GTACAAAA	0.0143156	0.0107656	0.0140364	0.135869	0.183072	0.0336481	0.32781	0.258578	0.457349	0.378189	0.0174641	0.0927172	-0.172816	0.0519431	0.0196428	0.144438	0.0695306	0.118801	0.041526	-0.011013	0.459684	0.441147	-0.0468645	0.0975477	0.429136	0.205182	0.248557	0.293646	0.0945759	0.0404806	0.217491	0.197947	0.45165	0.445087	0.312539	0.205606	0.321702	0.372108	0.112777	0.0436143	0.187917	-0.031806	-0.00573244	-0.00580768	0.226275	0.0763544	0.0170996	0.0160424	0.164683
GGTACAAA	0.121844	0.229011	0.310006	0.314593	0.0695572	-0.0290459	0.320578	0.331896	0.459119	0.402601	0.283933	0.236542	0.136434	0.146301	0.207852	0.297827	0.168489	0.194872	0.193734	0.240287	0.459566	0.411538	0.262939	0.322257	0.397931	0.184987	0.387715	0.365682	0.251688	0.179332	0.092372	0.0547577	0.322241	0.334171	0.215299	0.150791	0.267839	0.214666	0.28754	0.265414	0.258894	-0.0705479	0.111836	0.238217	0.222221	0.284979	0.255968	0.261366	0.237244
TACAAACA	-0.014618	0.179899	0.196157	0.269234	0.00951683	0.00817486	0.0889959	0.296615	0.472547	0.388661	0.145382	0.228348	0.0959534	-0.0545175	0.110639	0.255978	0.0182996	0.211685	0.0166229	0.170777	0.440527	0.426056	0.172577	0.281265	0.421304	0.31002	0.370484	0.256937	0.242301	0.219701	0.0946016	0.0558845	0.21984	0.268259	0.0585017	0.161779	0.199446	0.139621	0.201577	0.239846	0.131407	0.182521	0.0646805	0.224671	0.203551	0.164058	0.160299	0.188295	-0.00212039
GAATACAA	-0.0947198	0.12039	0.166472	-0.0334541	-0.0293286	0.057622	0.253154	0.238715	0.473773	0.357966	0.173917	0.209716	0.0682533	-0.0457831	0.0467617	0.143767	0.148927	0.067839	0.163572	0.0302353	0.42491	0.43653	0.161619	0.169847	0.435073	0.200468	0.413118	0.426605	0.0131114	-0.0585468	-0.0757056	-0.046969	0.0561528	0.0377053	-0.0531586	0.147503	0.104096	-0.0455334	0.214707	0.0654487	0.0638198	-0.0760143	-0.0489456	0.153434	0.112728	0.0584906	0.0897477	-0.0499547	0.116957
CTACAATA	-0.0307567	0.122316	0.239412	0.224182	0.0611558	-0.064721	0.295867	0.229382	0.448101	0.263906	0.145866	0.134014	0.0830792	-0.058847	0.183521	0.250218	0.242797	0.0676085	0.159628	0.0771079	0.433617	0.456294	0.234803	0.187746	0.430918	0.279655	0.396145	0.344001	0.0707596	-0.154516	0.123554	0.0794694	0.136753	0.173755	0.125668	0.238367	0.0246712	0.109643	-0.0379836	0.180564	-0.0156029	0.0483765	0.075	0.125947	0.0956104	0.0209843	0.174683	-0.00982459	-0.0495524
AAATGTAG	-0.219928	0.0279068	0.224705	0.0827337	-0.0201726	0.0734786	-0.141567	0.129196	0.462558	0.261848	0.112636	0.236456	-0.030149	0.0702225	0.0973665	0.298736	0.111658	0.1988	-0.0131683	0.161945	0.42954	0.46282	0.0660124	0.272215	0.340735	0.224486	0.204919	0.112592	0.0108749	0.205273	0.0487632	0.182446	0.123375	0.257684	-0.111295	0.259849	-0.0602242	0.08192	0.264496	0.00346605	0.020612	0.179362	-0.0147405	0.250241	0.195551	0.330199	0.0841595	0.230397	0.118759
AAATACAA	0.179281	-0.0604225	0.309216	-0.0140861	0.0751288	0.111794	0.212746	0.146112	0.482192	0.410553	0.264812	-0.0273418	-0.0169136	-0.0922066	0.244175	0.0481885	0.161149	0.0686432	0.199595	-0.0266768	0.430352	0.452901	0.306082	0.142814	0.305199	0.236967	0.28121	0.347116	0.20259	0.121197	0.0677275	0.0318689	0.330354	0.26955	0.188599	0.234994	0.23744	0.123836	0.17401	-0.0408105	0.229608	-0.00207759	0.0134322	0.0915428	0.204396	0.122399	0.11471	0.189048	0.116625
GAATTGTA	-0.258004	0.049716	-0.0691572	0.0875844	-0.0102137	0.159562	-0.157349	0.146539	0.4749	0.423075	-0.109474	0.117402	-0.143063	0.115767	-0.134104	0.0666682	0.0493734	0.129893	-0.220621	0.00990076	0.4122	0.446343	-0.0364752	0.0743568	0.273024	0.329262	0.226715	0.140647	-0.0702555	0.0742159	0.0714459	0.210643	0.127234	0.311744	-0.0947479	0.245782	-0.162709	-0.0554022	-0.005805	0.213129	-0.010602	0.206045	-0.168403	0.0585867	0.0179361	0.106447	-0.127327	0.140866	0.0636037
ATTGTATC	-0.123882	0.120887	0.213762	0.0597475	0.115095	0.125537	0.0307723	0.217141	0.4773	0.398769	0.192249	0.161845	0.090482	-0.0150792	0.174203	0.136804	0.102385	0.125656	0.141806	0.0442418	0.411322	0.440898	0.216812	0.117837	0.345237	0.250224	0.261042	0.178302	0.189925	0.171309	0.19062	0.0113681	0.274349	0.205855	0.225078	0.21883	0.124259	-0.067289	0.263077	0.0848968	0.050112	0.112047	0.207932	0.107488	0.261415	0.0518011	0.142976	0.13475	0.196827
AATACAAT	0.0828914	0.0474956	0.171031	0.0348265	0.129351	0.0779957	0.341778	0.164403	0.478303	0.352063	0.259189	0.11621	0.179172	-0.0926931	0.186816	0.0686788	0.217009	0.00330963	0.118259	0.00335492	0.41492	0.418382	0.125143	0.105393	0.319734	0.284048	0.357266	0.383942	0.252502	-0.017687	0.139667	0.00874609	0.309655	0.234659	0.0969192	0.0809074	0.263256	-0.0614036	0.273399	0.102362	0.203924	-0.0488602	0.0479612	0.132518	0.102029	0.0552921	0.0635139	-0.000529669	0.20077
AGATTGTA	0.162423	0.0776609	0.214289	0.193009	0.252528	0.125189	0.267445	0.271768	0.467431	0.351594	0.355194	0.199442	0.174832	0.0361287	0.32923	0.0762654	0.124578	0.10256	0.318365	0.0520511	0.422396	0.410725	0.255135	0.151423	0.332684	0.204656	0.284474	0.311448	0.408893	0.362807	0.151161	0.0357664	0.430124	0.349566	0.349122	0.235247	0.431315	0.381702	0.272951	0.286034	0.296802	0.0202035	0.247982	0.162388	0.288708	0.292106	0.363693	0.133483	0.152011
GTACAATA	0.0208251	0.113482	0.267622	0.142143	0.134135	-0.0167957	0.243142	0.316887	0.465224	0.368883	0.359686	0.24073	0.158439	0.14276	0.263881	0.224327	0.158449	0.198825	0.262977	0.251324	0.432017	0.353518	0.303134	0.227933	0.343607	0.312267	0.328353	0.37324	0.329866	0.276459	0.155861	0.176135	0.313665	0.215607	0.336408	0.222309	0.391791	0.138464	0.361081	0.300657	0.237601	0.0306553	0.228569	0.340725	0.310172	0.252501	0.309426	0.259886	0.291728
CTATTGTA	0.0767793	-0.142481	-0.0488983	-0.0449559	-0.0154135	-0.0743807	0.0678102	-0.0760906	0.457191	0.217972	-0.128567	-0.0150691	-0.207417	-0.0898287	-0.101189	-0.133536	0.000514275	0.033761	-0.0981229	-0.0874597	0.414507	0.423383	-0.0825577	0.0497082	0.366007	0.219809	0.204432	0.269067	-0.0176457	-0.0609835	-0.110073	-0.114086	0.145431	0.0700216	-0.00653683	-0.0717419	-0.0183894	-0.0992893	0.149542	-0.070203	-0.034689	-0.0546298	-0.10846	0.0334489	0.0625943	-0.0867103	0.0383359	0.0124402	0.0308697
GGATACAA	0.0759178	0.0440607	-0.0862269	0.153793	-0.126761	-0.162709	0.0981277	0.231533	0.456479	0.391469	-0.178252	0.248935	-0.158336	-0.0393957	-0.224185	0.144065	-0.0472864	0.113721	-0.262709	0.0852627	0.403644	0.411528	-0.17122	0.14903	0.343307	0.239957	0.334141	0.218859	-0.01296	0.137117	0.219557	0.230475	0.310709	0.292926	0.277148	0.334414	0.0813336	0.185703	0.0952956	0.196085	0.0734143	0.215646	0.0522433	0.281063	0.141029	0.111529	-0.104769	0.154415	0.102681
CAATTGTA	0.026373	-0.0681296	0.232724	-0.0205952	-0.0775115	0.109501	-0.102826	-0.00522571	0.470071	0.378593	-0.0727977	-0.0253541	0.0252513	-0.156384	0.14877	0.00884519	0.17408	0.085581	0.115954	-0.0223893	0.412586	0.418376	0.117392	0.017432	0.345379	0.0968126	0.218917	0.135408	-0.100305	-0.16968	0.101104	0.0150408	0.242663	0.151317	0.154743	0.0060654	-0.052055	-0.196658	0.171996	-0.071218	-0.0194894	0.0490056	-0.0566422	-0.00609158	0.238102	-0.118243	-0.0989696	-0.142481	0.0442611
AATTGTAT	-0.148812	0.0419537	0.0361897	0.150762	-0.10348	0.0880406	0.119801	0.227288	0.474453	0.437584	-0.255909	0.130154	0.0261272	0.0177807	-0.0249432	0.153469	0.132218	0.121407	-0.00677577	0.0396888	0.359948	0.436429	-0.0485369	0.126371	0.370885	0.0953191	0.321388	0.140228	-0.0579149	-0.015499	0.159818	0.127356	0.326594	0.341989	0.141944	0.164103	-0.107935	0.102163	0.194234	0.181769	-0.126201	0.0103395	-0.0202178	0.197615	0.136776	0.184898	-0.0304831	-0.00528379	0.0159785
AAATTGTA	-0.109259	0.144718	0.247222	0.182014	0.233688	0.182927	0.115906	0.30639	0.466372	0.455444	0.309	0.23499	0.0362218	0.111977	0.135355	0.197174	0.127737	0.27733	0.0151931	0.142168	0.430171	0.414957	0.195318	0.145714	0.288571	0.396798	0.320638	0.269354	0.255783	0.282749	0.112496	0.205114	0.238274	0.357093	0.176083	0.222198	0.143147	0.128705	0.27569	0.339766	0.198453	0.147764	0.0722838	0.244975	0.195231	0.249955	0.0929768	0.285676	0.172171
ATACAATA	-0.120343	0.242461	0.160104	0.225309	0.0756969	0.0611036	0.161444	0.380172	0.450998	0.436781	0.163178	0.301532	-0.136552	0.0575456	0.0994852	0.19789	-0.0012864	0.210203	-0.0506946	0.0201408	0.398744	0.406556	0.101188	0.143673	0.281157	0.261352	0.370778	0.167309	0.187029	0.192806	0.0652264	-0.0108056	0.245707	0.344466	0.101413	0.148271	0.194769	0.199696	0.141973	0.298786	0.0865893	0.202834	0.111823	0.280896	0.138947	0.235411	0.152344	0.0934033	0.0550399
ATATTGTA	-0.0577354	0.0128419	0.0882645	0.122409	0.105784	0.00333156	-0.0170485	0.171428	0.452119	0.365713	0.0391809	0.0747656	0.163076	-0.00259735	0.0172193	0.18146	0.0103085	0.0845985	0.0109377	0.109808	0.414489	0.423344	0.064065	0.14111	0.30119	0.147852	0.262627	0.197377	-0.077777	-0.0352848	-0.0746456	-0.104001	-0.0465457	0.169565	-0.232883	0.00210486	-0.006894	-0.0185679	-0.0479413	0.156466	0.00345904	0.031739	-0.0495938	-0.0021625	-0.00150427	0.108798	-0.141567	0.0844214	-0.0995176
AGATACAA	0.150273	0.13621	0.190866	0.12746	0.0383345	0.0848345	0.22799	0.266493	0.453929	0.225013	0.191537	0.241312	-0.0225652	0.110702	0.140419	0.270046	0.293951	0.184645	0.128287	0.109412	0.436763	0.426716	0.238637	0.140744	0.37801	0.0831797	0.298582	0.317244	0.287796	0.210059	0.0855649	-0.0287754	0.266621	0.234415	0.239202	0.248123	0.345192	0.242028	0.145999	0.0847549	0.241681	0.166351	0.227513	0.312729	0.261264	0.162037	0.186171	0.0958103	0.139505
CTTTTGTA	-0.059157	0.0557175	0.233413	0.135013	-0.00149842	-0.0215784	0.103623	0.237202	0.446086	0.229001	0.253398	0.259635	0.131642	0.0447128	0.138529	0.247201	0.177192	0.221488	0.0712911	0.135409	0.453765	0.445388	0.257446	0.185593	0.353888	0.236465	0.317518	0.109992	0.061376	0.198295	0.244902	0.209577	0.371617	0.299875	0.271836	0.329209	0.0938804	0.17457	0.163835	0.261007	0.0860762	0.258565	0.037124	0.284053	0.22384	0.191374	0.205487	0.0564735	0.116435
CATTTGTA	0.0180295	0.0533231	0.114122	0.0387605	-0.161618	-0.0778408	0.155199	0.171938	0.436083	0.0858411	0.151243	0.112428	-0.158004	0.0861956	0.0545587	0.132862	0.0620621	0.160769	0.0333752	0.107298	0.454527	0.43639	0.00633198	0.143879	0.265694	0.195402	0.290105	0.282676	0.0600213	0.157685	-0.0698723	0.0331936	0.0831274	0.250022	-0.0155245	0.206434	0.143342	0.155003	0.123924	0.0665465	0.180401	-0.0932539	-0.0466654	0.172336	0.0272279	0.0456459	0.106336	0.0638365	-0.110182
CGTTTGTA	-0.149349	-0.1057	-0.194692	-0.117393	-0.148945	-0.19393	-0.145717	-0.128651	-0.0563548	0.00290346	0.257404	0.132495	0.452582	0.395626	-0.114388	-0.0428939	0.152422	0.0432144	0.0945519	-0.021461	-0.12668	-0.196658	-0.0601366	-0.0289427	0.0315387	-0.034375	0.0272509	-0.0730261	-0.111407	-0.185078	-0.119044	-0.145223	-0.16968	-0.168403	-0.233442	-0.00822561	-0.133536	-0.102826	-0.0136743	-0.1	-0.00780749	-0.136151	-0.0743172	-0.0753575	-0.0810782	-0.0230265	-0.218709	0.048124	-0.223359
CAGAAGCC	0.186473	0.210711	0.251354	0.115052	0.0608637	0.0508927	-0.0060687	0.236098	0.140198	0.0065245	0.356993	0.324256	0.461551	0.370263	0.269031	0.239388	0.133639	-0.0333121	0.146143	0.270072	0.161464	0.143691	0.121746	0.138779	0.202278	0.012157	0.0972629	0.211877	0.165183	0.124016	0.164522	0.132758	0.116733	0.237324	-0.00742384	0.145513	-0.00031951	-0.16038	0.11722	0.0150422	-0.0400589	0.275579	0.129596	0.0515726	0.130705	0.162406	0.175106	0.215366	0.217619
CAGAAAAC	0.126551	-0.0679611	0.0484172	0.0425915	-0.263078	-0.0130114	-0.0934282	-0.0564948	-0.233255	0.122379	0.242099	0.328132	0.457172	0.387685	0.142714	0.0614168	0.234969	0.0288597	0.0782326	0.0578284	-0.313727	0.0247977	-0.127737	0.176588	-0.039049	-0.0764217	-0.0191928	-0.135458	-0.0691922	-0.0292752	0.160235	0.101316	-0.183863	-0.00672787	0.01585	0.173122	-0.158503	0.0287319	-0.035016	-0.0958884	-0.141005	0.150403	0.193553	0.00538549	0.0986774	0.0659553	0.138176	-0.0164587	0.19198
CAGAAACC	0.0413085	-0.050863	0.188981	-0.100612	-0.195861	0.0870203	-0.067601	-0.113847	-0.0461453	-0.13536	0.125758	0.0930152	0.457644	0.422699	0.127082	0.182935	0.127333	-0.0801502	0.127015	0.020327	0.024133	-0.113312	0.159629	0.0185624	0.115867	0.0323114	-0.03008	-0.132239	-0.00675744	0.0656024	0.14494	0.00501933	-0.0152467	0.00673967	0.106971	0.0348855	-0.0480467	-0.159007	0.0969909	0.0945712	-0.00828806	-0.0803603	0.00909127	0.122243	0.147033	0.109003	0.123113	0.0824607	0.213519
GTCTCTGA	0.382437	0.411291	0.0358177	-0.00794749	-0.197469	-0.215181	0.00931708	-0.121183	-0.080128	-0.18729	0.100595	0.324686	0.451748	0.42504	0.0865212	0.131341	0.137069	0.00688546	0.0876289	0.0333514	-0.118376	-0.0671749	-0.0869727	-0.134775	0.222354	0.0503071	0.0830315	-0.0302948	0.128469	0.183503	-0.0305664	-0.101055	0.125723	0.249333	0.198934	0.186046	-0.246471	-0.137263	-0.100305	-0.0625004	-0.0482046	0.0195155	-0.0722962	-0.000784871	-0.0385975	-0.0185176	-0.0983531	0.130959	-0.063511
CAGAACAC	-0.138616	-0.0335572	-0.074172	0.0845504	-0.0899226	0.00610882	-0.148678	-0.0387134	0.0704284	0.0511016	-0.102182	0.0751855	0.45142	0.437298	-0.00120215	-0.00510088	0.0533996	0.124352	0.0169449	0.0141784	-0.0825961	-0.0340671	-0.0748778	0.0363729	-0.200656	0.0500615	-0.0383514	0.0681817	0.0815858	0.112744	0.0901345	0.124433	0.169873	0.121262	0.278725	0.396724	0.0164456	0.24511	0.240277	0.134202	0.310658	0.344708	0.0925432	0.138554	0.0825872	0.205043	0.0644227	0.063842	0.167292
CTTTTGAC	-0.129414	-0.0160281	-0.0125304	-0.0356265	0.0576009	0.111567	-0.121042	-0.0155724	0.246781	0.0308185	0.054255	-0.00976968	0.455289	0.447658	0.0418772	0.142813	-0.0351066	0.158497	-0.00990657	0.110602	0.0221097	0.100573	0.140352	0.111335	-0.0239611	0.13525	-0.0182798	0.123833	0.132963	0.0467326	0.34673	0.271543	0.326115	0.206659	0.369378	0.378126	0.1872	0.295259	0.324366	0.303624	0.284516	0.384731	0.239495	0.140699	0.314606	0.346605	0.168655	0.138962	0.33572
GGTCAAAA	-0.0111706	0.132954	0.0121388	-0.0416035	0.00175246	-0.0188944	0.0781125	-0.00681136	0.0159154	-0.158838	0.332323	0.343578	0.454472	0.438643	0.0495702	0.109327	0.148536	0.0866649	0.0454725	0.0651565	0.148305	0.118186	-0.029837	0.041996	0.155472	0.00618609	0.125074	0.0796182	-0.0339349	-0.17122	0.0583228	-0.0635402	0.145337	0.0110403	0.167994	0.129245	-0.181816	-0.249757	-0.0749331	-0.0344841	-0.0554798	0.201519	-0.102045	0.0590899	-0.121824	-0.170997	0.0722146	-0.0147355	0.055073
ACAGAATC	-0.121538	-0.0188437	0.0448534	0.19291	-0.116622	0.00900908	-0.132975	0.109308	-0.184466	0.198144	0.319905	0.366515	0.458046	0.4407	0.0145283	0.178213	-0.1098	0.120326	-0.0601869	0.129225	-0.128988	-0.0419061	0.00914	0.141348	0.11794	0.0530363	0.173881	-0.0954204	-0.0481549	0.104102	-0.119723	0.0982829	-0.191721	0.253312	0.0315701	0.180893	-0.0672418	-0.0326214	-0.110791	0.150132	0.19919	0.355279	0.0114426	0.118657	0.0217214	0.206798	-0.0378285	0.184455	0.0147379
AGCAGAAA	-0.0871565	-0.0970503	0.0655073	-0.141454	0.00561903	-0.0431058	-0.161439	-0.149349	-0.0119202	-0.00749314	0.253068	0.130631	0.460194	0.442626	0.0826413	-0.0881395	0.0562551	-0.171897	0.0832062	-0.000382074	-0.00912127	0.0418709	-0.0798071	-0.00779636	-0.0629278	-0.192812	-0.0629916	-0.104335	-0.0553166	-0.0548983	-0.0223232	-0.181248	0.00924726	-0.112205	0.0559675	-0.0233609	-0.0124121	-0.0518772	-0.0875946	-0.0585301	0.0320219	-0.124185	0.0991986	-0.268825	0.0690985	-0.063466	0.124218	-0.160555	0.000787532
GACAGAGA	0.0838538	0.123439	-0.088197	0.148467	-0.235655	-0.0688744	-0.0450291	0.171117	-0.183863	0.108205	-0.0411617	0.0508637	0.455755	0.445523	0.00855264	0.108037	-0.129671	-0.0421585	-0.0060319	0.0929409	-0.307676	-0.0196112	-0.115304	0.0557788	-0.220273	0.037591	0.121904	-0.157675	-0.117914	0.0349324	-0.0238574	0.208346	-0.170774	0.095383	0.0665142	0.100061	-0.0811491	-0.119314	-0.0873748	0.158536	0.0119858	0.213974	-0.1451	0.0786614	0.0805337	0.110935	0.00666922	0.0497203	-0.124949
AATCAGAC	-0.0766953	0.0368266	-0.209474	-0.0276845	-0.111748	-0.19393	-0.281816	0.00886045	-0.101412	0.057202	0.224678	0.240417	0.454681	0.445202	0.0080677	0.112588	-0.0557077	0.0671612	-0.172584	0.0986822	-0.0981691	0.0278889	-0.255752	0.0716616	0.00554047	-0.146597	0.056184	-0.0404772	-0.20942	0.0307169	-0.210073	-0.036287	-0.108092	-0.0499374	0.0497325	0.0314099	-0.193554	-0.021046	-0.208619	-0.00816703	-0.256543	-0.0951791	0.0903331	0.0508054	-0.0827123	0.0327751	-0.144009	0.0374999	-0.247886
GGCCAGAA	0.0247719	-0.2011	0.00321177	-0.28962	-0.0632594	-0.14023	-0.165561	-0.151856	-0.199568	-0.0560216	0.101025	0.0207219	0.453038	0.443169	0.0685948	-0.174958	0.0764804	0.0503645	-0.0538458	-0.24318	-0.259346	-0.190658	-0.111634	-0.257675	-0.0897573	-0.166354	-0.185078	-0.119791	-0.115802	-0.149485	-0.0477845	-0.287943	-0.00779039	-0.31463	0.0474676	-0.27122	-0.1266	-0.0411606	-0.0578163	-0.249894	0.0287545	-0.0242411	0.0336281	-0.205948	0.0508141	-0.362525	-0.101909	-0.27986	0.0176485
CCGTCAGA	0.0433263	0.00945913	0.0578333	-0.00170701	-0.068723	-0.0489518	-0.0712418	0.0627853	0.052092	0.0274738	0.201181	0.170309	0.455068	0.447589	0.000482589	0.0713262	-0.0514771	0.0618758	-0.147625	0.0170506	-0.0442357	0.131252	0.0145214	-0.0581729	0.0531771	0.251782	0.077396	0.0023343	0.0567661	0.253947	0.0420889	0.045038	0.3547	0.35237	0.11424	0.146164	-0.186646	0.0741519	-0.00136086	0.174615	0.172571	0.0237226	-0.0781443	0.0843767	0.105047	0.113123	-0.0150081	-0.0264103	0.0928187
CAGAACAA	-0.103245	0.0532682	0.0512157	0.0489047	-0.113312	-0.0811426	-0.104528	-0.0743605	0.0765699	-0.0497352	0.0977645	0.0714586	0.457166	0.448944	0.193472	0.110218	-0.0151216	0.0887243	0.0593586	0.0707393	0.04855	0.0161575	0.0650253	-0.0347013	-0.0709496	0.0767806	-0.105849	-0.0160675	0.0734079	-0.0732387	0.0544492	-0.0527511	-0.0882076	0.0923948	0.138882	0.199436	-0.0153347	-0.10804	0.121696	-0.142136	0.218444	0.235457	0.136411	0.069239	0.0695452	-0.00288485	0.110449	-0.0657877	0.0206703
AAGTCAAA	0.0307271	-0.0974854	0.168632	-0.0334339	0.0504741	0.118177	-0.0329197	-0.0416111	-0.00522688	-0.0757009	0.233457	0.217262	0.458126	0.450625	0.147034	0.123829	0.124551	-0.133348	0.154273	0.138213	0.0818486	0.0932385	0.115337	0.151455	0.0517573	-0.241454	-0.0144618	-0.0434552	-0.0115129	-0.0893133	-0.109963	-0.103339	0.0339927	-0.0676608	-0.0403024	-0.0937527	0.0622432	-0.0138734	-0.172125	-0.180134	-0.030508	-0.0974879	-0.0242256	-0.0305593	-0.0678787	0.146176	0.0119955	0.0293406	-0.0772579
AGACAGAG	0.0837712	-0.0420537	-0.082017	0.00648625	0.0595629	-0.0285159	-0.0854692	0.148414	-0.106956	-0.122768	0.336856	0.296005	0.457186	0.449442	-0.00374223	0.10652	0.126907	0.0400805	-0.0932605	0.0623463	-0.0343727	0.259056	-0.0540146	0.127899	-0.0761427	0.0756767	0.181456	-0.0623067	0.0240232	0.0402012	-0.101909	-0.0481693	-0.0166311	0.144194	-0.0395974	0.137761	0.114791	-0.0173989	-0.152288	0.093984	-0.0355533	0.0209962	-0.00904926	-0.0404325	0.143745	0.138426	-0.0363788	0.146396	0.0230458
TAGACAGA	0.0627599	-0.0275493	-0.0304336	-0.0265192	-0.0588754	-0.091411	-0.0219203	0.0376142	-0.0672339	0.0990063	0.304401	0.272054	0.456559	0.452218	0.201526	0.0787675	0.0335547	-0.0143202	-0.0103801	-0.0719408	0.077072	0.0292432	0.0560215	0.135277	0.221384	-0.0112148	0.119851	0.032873	0.00197878	-0.143771	0.0452129	0.0126378	0.125287	-0.0237546	0.0655409	0.0610463	0.187765	0.071874	-0.0469907	0.0689974	0.134767	-0.114086	0.056452	0.0869321	0.0124092	0.147621	0.133913	-0.00316707	-0.00615503
CAGACAGA	0.16799	0.0989642	0.179175	-0.0527794	-0.183565	-0.227901	0.238239	0.147425	0.140966	0.0268476	0.184039	0.218989	0.453487	0.452683	0.345396	0.312462	0.355361	0.228595	0.416011	0.443533	0.101028	-0.224413	0.0616446	0.00374675	0.0961359	0.0976872	-0.0419197	0.205253	0.0157362	-0.121467	0.0815303	-0.125259	0.0874163	-0.0607366	0.109825	0.121982	0.127307	-0.059871	0.144078	0.0990441	0.105445	0.0204742	-0.0277651	-0.116115	0.117448	-0.0608033	0.0496683	-0.0481273	0.0768268
GTCATAAC	-0.130452	-0.000950797	-0.272816	0.0275394	-0.201323	-0.1057	-0.0361694	-0.0444717	-0.157025	0.00297282	-0.0826543	-0.0220336	0.451596	0.453022	0.0139651	-0.0912698	-0.269897	-0.095454	-0.165365	-0.113194	-0.185078	-0.262893	-0.289963	-0.0818079	-0.0589957	0.0350131	-0.0502012	-0.150307	-0.0332906	-0.105306	0.0674821	0.0235077	0.069895	0.0683314	0.0504058	-0.0455152	-0.121753	-0.0822469	-0.191721	-0.0826616	0.00278199	0.223973	0.0295268	-0.0403656	0.088754	-0.0372805	0.0624343	0.0293654	0.164783
ATCAGAGC	0.0506781	-0.0727768	-0.00421716	0.0588923	-0.119791	-0.035863	-0.0925838	0.131916	0.0381364	0.0832724	0.257295	0.254641	0.451717	0.454071	0.0216341	0.152789	0.0231245	0.0229152	0.124227	0.0960108	0.0133744	0.0842777	-0.0802667	0.0958873	0.218524	0.0747406	0.221591	0.140357	-0.0962231	0.0363218	0.199178	0.181358	0.165225	0.142493	0.10569	0.0590406	0.0283157	0.11093	0.0961917	0.11814	0.021361	0.0010992	-0.0442237	0.0385869	0.134574	0.0610458	0.0785934	0.0203201	0.233175
CAGAACTA	-0.000437358	0.197904	0.0315889	0.262967	-0.0313733	0.181455	-0.0731258	0.195559	0.164407	0.0870571	0.269874	0.372076	0.456904	0.454827	0.0515718	0.220477	0.0567381	0.166923	0.0186366	0.270802	0.118717	0.0848445	0.104584	0.185696	0.205442	0.0846876	0.174932	-0.0288437	0.161215	0.295711	0.203198	0.0890009	0.237975	0.247301	0.122795	0.228502	0.018117	-0.039621	0.0754802	0.119851	0.162376	0.138993	0.037295	0.223756	0.195719	0.161706	0.0653243	0.192928	0.222935
CGAACAGA	0.0137383	0.0728082	-0.0219103	-0.0317319	-0.0326677	-0.053019	0.0476909	0.0272093	0.0409431	-0.130627	0.300597	0.396849	0.458347	0.447623	-0.0449279	0.0538044	0.122471	-0.00230089	-0.0367819	0.0153247	-6.90583e-06	-0.0021719	0.109201	-0.103198	0.165599	0.0591606	0.0751326	0.0461991	0.000638388	-0.0487655	-0.0842163	-0.1011	0.0176195	0.0686236	-0.122915	-0.0839778	0.0508153	-0.0613105	0.000299195	0.0301875	0.281258	0.304332	0.0894738	-0.109366	-0.0684554	0.0194926	-0.0446066	-0.0209842	0.0844853
ACAGAAGC	-0.168403	0.0268621	-0.182102	-0.0649409	-0.0884017	-0.045173	-0.12204	0.0069516	-0.145593	-0.113253	0.0212893	0.319357	0.465177	0.444483	-0.150864	0.081814	-0.0181775	0.0419232	-0.102733	0.118116	-0.0897577	-0.0722831	-0.122841	-0.0479857	-0.103716	-0.093546	-0.0133323	-0.17122	-0.0581339	-0.0177807	-0.244491	-0.09494	0.00376249	-0.113966	-0.071449	-0.0222641	-0.221753	-0.00234336	-0.111126	-0.242946	-0.120482	0.180502	-0.177728	-0.0227899	-0.234008	-0.0785758	-0.19914	-0.0795994	-0.155129
GACAGAGC	-0.0169045	-0.0370274	0.164612	-0.00770422	0.043516	0.0792334	0.0604613	-0.133068	0.210315	0.101834	0.343356	0.205814	0.464129	0.447592	0.183758	0.00850046	0.092747	-0.080799	0.0917115	-0.0302555	0.277621	0.0490296	0.118262	-0.0143458	0.259649	0.01143	-0.00432228	0.287901	0.241441	-0.0778601	0.187445	-0.0806644	0.354634	0.0253614	0.168848	-0.182681	0.134894	0.042339	0.120163	-0.177211	0.0423992	0.0763244	0.0767448	-0.0111413	0.212153	-0.174232	0.262013	-0.0156864	0.315011
AACAGAAT	0.213849	-0.104335	0.193368	0.0830895	0.0977679	0.144519	0.166951	-0.122988	0.25056	0.0149042	0.390571	0.219414	0.461124	0.453569	0.226359	0.0585954	0.15589	-0.0160671	0.259166	0.163997	0.258009	0.0396045	0.106498	-0.00438887	0.229857	-0.0852865	-0.0240771	0.237149	0.324712	0.186104	0.0976665	-0.106956	0.372018	0.219066	0.11665	-0.0575407	0.221294	-0.0496781	0.290008	-0.0799262	0.283969	-0.257512	0.106641	-0.00674354	0.181963	0.0611451	0.254385	0.112033	0.20396
AGAACAGA	0.14551	-0.147237	0.0433881	-0.155596	0.0687978	-0.133348	-0.0742012	-0.0136223	0.106309	0.00758501	0.307555	0.243579	0.461277	0.456047	0.0274235	-0.0616434	0.131602	-0.045884	0.0217441	-0.0539743	-0.0633336	-0.0884969	-0.0155536	-0.11261	-0.0136851	0.102744	-0.0462031	0.0666124	-0.0270995	-0.0744286	-0.0831688	-0.216749	-0.0144676	-0.123508	0.154027	-0.138934	0.00775968	0.0801876	-0.0515324	-0.0779874	0.132081	0.0990295	-0.0499164	-0.139362	-0.15784	-0.181248	-0.111295	-0.199568	-0.107727
ATTCTGCC	-0.0757797	-0.133348	0.0393906	-0.0980705	0.00485195	-0.0322299	-0.0361697	-0.0665637	-0.0547008	-0.0593422	0.237928	0.220779	0.462337	0.45295	0.0746697	-0.00325714	0.0536253	0.0627795	0.0927263	0.0431559	-0.077225	-0.111238	0.0612224	-0.164016	-0.0977535	-0.0842	-0.0937467	-0.129499	0.189885	-0.151999	-0.134104	-0.246725	-0.0470898	-0.134008	0.134534	0.218013	0.103019	-0.180688	-0.0391259	-0.0671351	-0.0829246	-0.0861205	-0.0391102	-0.142481	-0.0223656	-0.250031	-0.046053	-0.0140674	-0.1007
ACGTCAGA	-0.228651	-0.0541121	-0.265956	0.0581059	-0.0971461	-0.218442	-0.200305	-0.110403	-0.173518	-0.0280679	0.249754	0.239528	0.460632	0.454016	-0.054017	0.0111574	-0.129671	-0.200833	-0.165365	0.0478143	-0.180688	-0.0552772	-0.16073	-0.0467755	-0.156225	-0.188273	-0.119723	-0.166756	-0.0998046	-0.113077	-0.133255	-0.00537969	-0.104721	-0.0572996	-0.149621	-0.0360306	-0.177469	-0.244733	-0.16968	-0.255129	-0.158004	-0.202641	-0.195468	-0.223807	-0.281531	-0.0594977	-0.146597	-0.153018	-0.274958
CAGAACCC	0.0400732	-0.0189372	0.166736	0.108178	-0.159517	-0.0819886	0.124543	0.0939651	0.156571	-0.0241764	0.0284921	0.17255	0.459782	0.454188	0.0668664	0.172541	0.160562	-0.00161113	0.00282096	0.130543	0.108339	0.213588	0.1275	0.114939	0.149929	0.0368181	0.112683	0.124364	0.0639804	0.115652	0.024044	0.0783316	-0.0115859	0.12882	0.152676	0.211666	-0.0130808	0.150976	0.190959	-0.00805574	0.2842	0.322518	0.0634928	0.151217	0.126617	-0.0062249	-0.0624549	0.0309937	-0.0547615
AGTCAAAA	0.221471	0.191819	0.0058576	0.0328839	-0.0721926	-0.295468	0.0439131	0.00611481	-0.0340582	-0.0708163	0.0808591	0.192322	0.459133	0.459342	0.0684031	0.0970116	0.16804	0.0561838	-0.117522	0.19718	-0.0817968	-0.0878053	0.0186169	-0.140012	0.123227	0.0325265	-0.00794676	0.1225	-0.0520069	0.00410123	0.191922	-0.0776842	0.0201376	-0.186646	0.0750737	0.0994363	-0.0877391	0.040636	0.192053	0.144176	-0.0665307	0.108098	0.0104057	-0.0797441	0.0331557	-0.12652	-0.0560574	-0.266555	0.213496
GTCTGACA	-0.186328	-0.113018	-0.0900523	-0.195861	0.0980906	-0.0770111	-0.162709	-0.133255	0.0201185	-0.0384637	0.0267096	0.118785	0.46589	0.460597	0.00287367	0.113002	-0.144491	0.020204	-0.137675	-0.0580462	-0.142597	-0.0225546	-0.0697715	-0.0794614	-0.128567	0.0573257	-0.0902285	0.0664475	-0.0858867	-0.16073	0.0531485	-0.0154221	-0.0820807	-0.0867011	-0.0588214	0.0203405	-0.0536791	-0.215366	0.0761348	-0.0133264	-0.0213667	-0.0480444	-0.0866458	0.0200108	-0.00348971	-0.12644	0.029114	-0.0426307	0.0231667
TCGTCAGA	-0.0184179	0.101533	0.164545	0.0680647	-0.14318	-0.211862	-0.19431	-0.0196635	0.122864	0.0487048	0.159894	0.193682	0.466238	0.456245	0.158459	0.200995	0.0969427	0.185139	0.033934	0.0846948	-0.0389882	-0.02262	0.00105772	0.101055	-0.0335136	0.119732	0.0261866	0.0234005	-0.00305855	-0.122988	0.0817524	0.110027	-0.0336687	0.126168	0.195498	0.279237	-0.0217603	-0.0796695	0.143112	0.0947641	0.0608265	0.146123	-0.032386	0.15782	0.0398448	-0.0686342	0.124721	-0.0425873	0.159317
ATCTGACA	-0.119791	0.215726	0.0341744	0.0805384	-0.0333044	-0.20804	-0.0660086	0.11338	-0.0018373	0.127914	0.306354	0.210841	0.463724	0.458874	0.0979473	0.27881	0.137683	0.179197	-0.0172227	0.17454	-0.0197321	-0.010597	0.0144181	0.0536545	-0.130803	0.144054	0.116395	0.145183	0.0803216	-0.0705322	0.122635	0.075012	0.0470544	-0.0176326	0.155694	0.171094	0.0299773	0.0390263	0.218367	0.258473	0.0692286	0.0943719	0.0747372	0.0878053	-0.0562755	0.0866823	-0.011705	0.0212863	0.0697642
AATCTGAC	0.12849	-0.0308389	0.0925257	-0.0966022	0.0417794	-0.0858867	-0.0982341	-0.0227859	0.237974	0.1094	0.285345	0.226863	0.461344	0.458534	0.25317	0.214376	0.119711	0.108284	-0.0303505	0.150411	-0.00559479	0.172915	0.0737407	0.114124	-0.0372159	0.156005	-0.0447925	0.129915	0.0745107	-0.0528167	0.225924	0.134885	0.227586	0.129155	0.185259	0.163659	-0.0778083	-0.224109	-0.0276147	0.092255	0.119966	0.0520195	0.0206017	0.158504	0.085577	0.0633535	0.135945	0.0774729	0.130189
AATTCTGA	-0.109909	-0.240012	-0.19393	-0.181816	-0.282102	-0.19914	-0.128067	-0.31152	-0.216304	-0.16925	0.249925	0.34436	0.456336	0.461716	-0.134582	-0.119654	-0.134008	-0.259007	0.0078389	-0.0096979	-0.0958004	-0.268613	-0.181816	-0.284164	0.0940977	-0.272816	-0.337366	-0.0624999	-0.227409	-0.239041	-0.247756	-0.287943	-0.125571	-0.265758	-0.123359	-0.348017	-0.0154258	-0.111351	-0.170997	-0.281816	0.0301113	0.0925559	-0.191364	-0.182681	-0.228067	-0.197881	-0.182391	-0.150031	-0.27122
CTTCTGCC	-0.0139688	-0.093537	-0.195078	-0.117457	-0.257349	-0.180134	-0.0674127	0.0703812	-0.208884	-0.0498957	-0.0561801	-0.0196054	0.452161	0.462832	-0.215677	0.0274314	-0.14698	-0.0490467	-0.216052	-0.0220582	-0.245967	-0.167985	-0.180967	-0.143063	-0.0127631	-0.0149752	-0.060509	-0.168825	-0.153165	-0.0284346	0.236333	0.156392	-0.0410315	-0.18041	0.104036	-0.0461065	-0.122621	-0.129158	-0.0433851	0.197184	-0.0602615	-0.101728	-0.0854344	-0.0199422	0.0643196	0.0621681	-0.258838	-0.211919	0.176678
GGTCTGAC	-0.100612	-0.0774742	-0.211014	0.0728584	-0.161439	-0.132606	-0.0941012	0.0433132	-0.245346	-0.0694363	0.167089	0.262211	0.456223	0.462296	0.00764952	0.0213822	0.0415023	-0.0316802	-0.0975453	0.069417	-0.372584	-0.121538	-0.210568	0.0693635	-0.125259	0.0301214	-0.0130423	-0.208831	-0.112494	-0.0854161	0.271861	0.370573	-0.0968636	0.0147698	0.042981	0.18346	-0.243652	-0.0167339	-0.149621	0.0443182	0.0194588	0.0946042	0.107817	0.0490104	-0.0032562	0.143197	-0.00413181	0.118334	0.084739
ACCAGAAG	-0.017745	0.156949	-0.0162441	0.118254	0.111339	-0.184466	0.0927525	0.0975244	-0.0614292	-0.000746681	0.336567	0.358245	0.457235	0.466786	0.189302	0.141399	0.0601304	0.121469	0.143768	0.222729	0.0566751	0.116788	-0.0225969	0.0966891	0.0912938	-0.059008	0.178067	0.0310446	0.207266	0.271918	-0.00376411	0.0852614	0.302053	0.300747	0.0109311	0.161212	0.143048	-0.0392007	-0.0653892	0.0550041	0.105588	0.0197187	-0.0344394	0.0924135	0.0933675	0.172859	0.175862	0.161033	0.0633843
CAGAACAG	-0.186012	-0.151428	-0.208831	-0.229499	-0.234486	-0.319314	-0.331695	-0.122185	-0.176447	-0.115058	-0.049121	0.14779	0.453309	0.472329	-0.145842	-0.0749648	-0.198716	-0.119246	-0.108145	-0.122475	-0.291721	-0.288273	-0.157025	-0.199568	-0.258838	-0.168825	-0.159517	-0.335067	-0.18041	-0.218642	0.0784504	-0.00679938	-0.139469	-0.0877001	0.0794527	-0.0187069	-0.158838	0.0369831	-0.16517	-0.198716	-0.0986404	-0.0404345	-0.18041	-0.208355	-0.133255	-0.165561	-0.237675	-0.120621	-0.204001
CCTTCTGA	0.297606	0.277978	0.0725309	-0.138091	-0.088596	-0.263827	0.0978844	-0.00879821	-0.0248871	-0.0603137	0.100427	0.318865	0.463481	0.475241	0.144394	0.206271	0.189908	0.0505253	0.0543643	0.237035	-0.0695572	-0.00735747	-0.0613241	-0.0776242	0.143634	0.0447705	0.0166551	0.157214	-0.0822464	-0.102	0.0379994	-0.0999922	0.0362517	-0.174958	0.0467065	0.0502275	-0.0525256	0.0404674	0.144419	0.139281	-0.0177676	0.115804	0.0266713	-0.0133716	-0.00291587	-0.165561	-0.0412927	-0.15784	0.112778
GTCAGACA	0.127596	-0.0299702	0.225225	-0.106349	-0.113906	-0.029353	0.102566	-0.0778348	0.057963	0.0385533	0.325452	0.0360779	0.466392	0.475598	0.366455	0.292924	0.393053	0.210186	0.292913	0.245886	0.0854339	-0.207212	0.127681	-0.0245922	0.121865	-0.162525	-0.179588	0.0096487	0.193052	-0.0149996	0.0264337	0.203665	0.0509179	0.0873592	0.137339	0.0454346	0.0759363	0.098641	0.0705787	0.0815495	0.204348	0.115754	0.140241	0.0568468	0.163578	0.151802	0.181855	0.0402643	0.146983
TCAGAAAA	-0.00941205	0.014878	0.119613	0.0536811	-0.173755	-0.0620979	-0.0717729	-0.0200911	0.0154011	0.0416588	0.329259	0.351603	0.467359	0.476988	0.179794	0.114784	0.141871	0.0721151	0.0998657	-0.0102828	0.0542926	-0.0802361	0.130666	-0.00393937	0.0556645	-0.0782303	0.123329	-0.0135839	0.0296178	-0.16517	0.27566	0.279443	0.124015	0.180447	0.149178	0.1549	-0.00437489	-0.12636	0.188143	0.0585548	0.234932	0.291713	0.054964	0.0418099	0.0219682	0.0521131	0.124685	0.107711	0.140875
AACCAGAA	0.00998153	0.183541	-0.19393	-0.111805	-0.325571	-0.0258379	-0.182974	-0.0652951	-0.17167	-0.0526376	0.251071	0.359945	0.466085	0.472685	-0.120971	0.00744847	0.0206266	-0.0322243	-0.0450865	0.0688216	-0.111126	0.0191986	-0.0444144	-0.0524275	-0.172584	0.0522467	0.0175744	-0.1451	-0.164397	0.0318379	-0.112901	-0.0425595	-0.077281	-0.0138589	-0.109366	-0.0865036	-0.314691	-0.0745331	-0.266756	-0.0486312	-0.0205288	-0.191364	-0.121325	-0.00426662	-0.155752	-0.1266	-0.0494084	-0.111862	-0.0479312
ACAGAACC	-0.0513697	-0.0810911	-0.130892	-0.074114	-0.243771	0.0822788	-0.250031	-0.0850889	-0.16968	-0.113077	0.209402	0.369937	0.468051	0.47181	-0.0792748	0.0597054	0.0567799	-0.178516	0.00798318	0.116319	-0.194692	-0.0575407	-0.0495666	0.0319132	-0.0407542	-0.0396307	-0.00166056	-0.22993	-0.112784	0.0741258	0.00433906	-0.0447359	-0.124109	-0.0661765	-0.0379898	0.0613514	-0.0752105	0.158344	-0.0992491	0.00589397	-0.0345824	-0.14389	0.0852257	0.074396	-0.0400215	-0.105998	-0.147625	-0.0943431	-0.0584534
CGGACAGA	-0.0748522	0.14963	0.105129	0.0864571	-0.0309923	-0.212494	-0.0288317	0.10521	0.00698242	-0.0684706	0.386748	0.387792	0.468592	0.469555	0.0974274	0.140114	0.110066	0.0303735	0.171103	0.200606	0.0432596	0.0753636	0.14027	0.0770412	0.155317	-0.0187139	0.165806	-0.0260977	0.0499086	-0.00687461	0.0496477	0.13117	0.150234	0.14128	0.191236	0.191748	0.111521	-0.0269479	0.126086	0.111111	0.0727503	-0.057885	0.00831133	0.0768599	0.0216824	0.174926	0.200312	0.102275	0.10715
AACAGAAG	-0.0312599	0.155001	0.00151455	0.114515	-0.0169055	-0.0503801	-0.00584876	-0.000216819	0.152624	-0.140561	0.357273	0.405168	0.468047	0.469868	0.0762677	0.15564	0.0335577	0.069889	0.0607571	0.0391762	0.27423	0.167114	0.0856193	0.0309319	0.175874	-0.0819765	0.0818349	0.074186	0.133056	0.134318	-0.0546272	-0.0790941	0.144676	0.100164	0.15747	0.0802789	0.108435	0.0661069	0.15399	0.0430154	0.268113	0.077595	0.0771888	-0.017741	0.0567426	0.0066776	0.180454	0.0616602	0.0297767
CGACAGAA	0.176154	0.137912	-0.0403228	-0.0252892	-0.0862969	-0.139903	0.0872263	0.0205874	0.0065906	0.0042709	0.336528	0.422361	0.470952	0.472825	0.0780395	0.172065	0.180705	0.0197601	0.046803	0.182468	-0.0722036	-0.0911368	0.00750025	-0.026621	0.198138	-0.0456077	0.0928825	0.0434043	0.0805006	0.228863	-0.211805	0.0574157	0.00779174	0.163145	-0.0740108	-0.0795557	-0.0719857	0.0121413	-0.0268299	0.115473	-0.0157224	0.0844457	0.0332964	0.0835875	0.00244044	0.0934845	0.0791011	0.0895069	-0.198297
GGCAGAAC	0.0378155	0.142764	0.179487	0.207204	0.135592	0.143148	0.0807234	0.0928319	0.169134	-0.146471	0.347361	0.435458	0.475049	0.466205	0.138432	0.243726	0.129421	0.120131	0.132388	0.179247	0.150361	0.0140819	0.118388	0.157051	0.181111	-0.0192931	0.0478535	0.0409809	0.0390125	0.10345	-0.0338728	0.0279502	0.102593	0.170091	0.0516638	0.109856	0.175922	-0.0662469	-0.00215542	0.152571	0.083484	0.127452	0.107978	0.156278	0.063938	0.27206	0.119546	0.223153	-0.120273
AAGACAGA	0.00759537	0.0256743	-0.115428	-0.0371738	-0.299568	-0.235952	-0.197881	-0.0515632	-0.0738176	0.0141921	0.250525	0.414957	0.474164	0.472661	-0.163078	0.167067	0.132616	0.109629	-0.184164	0.0124097	0.0012092	0.0946261	-0.123433	-0.0524192	0.0825219	0.114297	0.0895684	-0.0641256	-0.00228464	-0.0670041	0.180631	0.143826	-0.0310407	-0.0484479	0.0848369	0.0799976	-0.0173679	-0.0326144	0.00263764	0.0117291	-0.111407	-0.0906095	0.0673883	-0.0600491	0.127437	0.0382171	-0.110073	-0.123732	0.0604282
TCTGTCCA	-0.132883	0.0106141	0.153783	-0.106399	-0.132331	-0.0877964	-0.088403	-0.0256027	0.0298053	-0.0782914	0.301951	0.415436	0.473235	0.476447	0.164218	0.0819571	0.189122	0.181879	0.0583338	0.127296	0.156894	-0.0579785	0.0938831	-0.00677272	0.190106	0.1269	-0.0225805	0.152369	-0.0675306	-0.0885169	-0.111407	-0.0269867	0.0481377	0.00873679	0.128054	0.12354	-0.158503	0.0549847	0.00877325	-0.0585342	-0.0298685	0.0712244	-0.0101575	0.0242071	-0.0143697	-0.105998	-0.0404635	-0.147108	0.0723106
TGACAGAA	0.0509725	-0.202273	-0.125493	-0.0375886	-0.00520881	-0.231158	-0.0324461	-0.0860896	-0.0675911	-0.00979389	0.361776	0.370027	0.474989	0.469503	0.100732	0.0149955	0.0497249	-0.0037679	0.0746863	-0.091906	-0.110958	-0.208991	-0.0671567	-0.0419822	0.0193361	-0.11152	-0.0836517	0.116134	-0.0432124	0.0417929	-0.282391	-0.0834198	-0.112726	-0.0396188	-0.0979465	-0.12815	-0.0061684	0.0607011	-0.143652	-0.111351	0.0142029	0.0581791	-0.000324017	-0.0822492	-0.157025	0.0184367	0.105533	0.00385025	-0.254821
AGGCAGAA	-0.059757	-0.0811358	-0.0236945	0.0605567	-0.128819	0.126101	-0.230277	-0.143533	-0.196658	0.0593726	0.339382	0.371752	0.473633	0.469256	-0.117849	0.157058	0.0814165	0.00592013	0.0261682	0.18717	-0.24168	-0.153018	0.0549353	0.0365159	0.143602	-0.161083	0.0158587	-0.188941	-0.123508	0.040453	-0.17986	-0.185699	-0.131515	0.121054	-0.0525645	0.062085	-0.0762107	-0.0678149	-0.350169	-0.0484966	0.133941	0.368662	-0.0220455	0.0110616	0.0106394	0.159139	-0.0657723	0.159756	0.0752765
GAGCAGAA	-0.152724	0.121004	-0.175945	0.217054	-0.0723934	0.0127772	-0.246852	0.152382	-0.328988	0.0560256	-0.266959	0.121095	0.476795	0.470525	-0.107469	0.152144	-0.166555	0.0275239	-0.123284	0.0495311	-0.339469	-0.117914	-0.225104	0.188641	-0.200789	0.0395109	0.122166	-0.289279	-0.312843	0.0705726	-0.0451429	0.220933	-0.0567109	0.144717	0.0272021	0.16502	-0.191721	-0.282391	-0.247625	0.230502	0.0870526	0.398634	-0.241794	0.158496	-0.112378	0.0832526	-0.146471	0.201256	-0.0568377
GAATCAGA	0.0639395	-0.00771697	-0.0586593	0.0753131	-0.0638675	-0.0250966	0.0646548	-0.118842	-0.144249	0.0489089	0.309292	0.30028	0.478946	0.47144	0.179413	0.138853	0.0958804	0.01817	0.0662416	0.151196	-0.0678503	-0.0748369	-0.0712366	-0.028859	-0.140121	-0.0877132	-0.0924599	-0.0348321	0.099092	-0.0796671	0.247375	0.223268	0.0763888	0.0246904	0.307032	0.276257	0.167817	0.141935	0.191367	0.403382	0.17201	0.213534	0.196983	0.0839755	0.22427	0.207951	0.153548	0.121544	0.241433
ATCTGACC	0.0568564	-0.028203	-0.0608199	0.0019322	-0.227165	-0.0102494	-0.24034	0.0685732	-0.272816	0.151801	0.0670139	0.181127	0.481338	0.470909	0.073348	0.169282	0.133748	0.103843	-0.0558054	0.193242	-0.227572	0.0252713	-0.0519743	0.11148	-0.00499162	-0.051657	0.0165546	-0.223062	-0.0811161	0.104605	-0.103292	0.0559543	-0.153018	-0.00332544	0.00520938	0.0647553	-0.0471921	0.158042	-0.0191769	0.197142	-0.15544	-0.00918309	-0.225493	0.0422864	0.0113859	0.16004	-0.222841	0.115702	0.0810807
ACTCTGAC	-0.0482377	-0.174958	0.0554625	-0.144129	-0.19431	-0.16073	-0.0567878	-0.059422	-0.123136	0.0496608	0.124528	0.030544	0.482529	0.469294	0.135923	-0.0538417	0.169388	-0.00990553	0.073094	-0.141117	-0.163078	0.0805616	0.0174558	-0.067239	-0.0472206	0.0280961	-0.0932676	-0.0490668	-0.0741078	-0.138091	-0.0265709	-0.124642	0.0064546	-0.115864	0.0564024	-0.0612388	-0.00125326	0.0492409	-0.0176616	-0.030102	0.0094317	0.00815331	0.0913141	-0.0726106	0.11526	-0.16925	0.0352175	-0.147237	0.040994
TCTGACAA	-0.238828	0.00830204	-0.0304891	0.0379557	-0.0629041	-0.137779	-0.12204	0.0791152	0.0684873	0.0139635	0.1115	0.3411	0.487705	0.463489	0.010943	0.127886	-0.15391	0.0179898	-0.0390174	0.148901	-0.14168	-0.0930029	0.000553999	0.156264	-0.0712606	-0.0340879	0.0077265	0.0115932	-0.167366	0.176499	-0.0352321	0.157287	-0.176955	0.135105	-0.237779	0.151628	-0.138195	-0.0169515	0.00263862	0.0384423	-0.111634	0.175109	-0.0949686	0.0810864	0.078345	0.185248	0.0103202	0.206076	-0.0710853
TCAGAAGA	-0.115677	-0.00859516	0.214482	-0.0707848	-0.00212914	-0.236856	-0.16216	-0.175696	0.13425	0.0703432	0.281616	0.292914	0.489019	0.471155	0.263658	0.130806	0.160889	-0.154363	0.0923885	0.0446525	0.0937111	-0.0738235	0.138179	-0.113727	0.0714167	0.057268	-0.143771	0.146129	0.148908	-0.0444055	0.219755	0.0684483	0.222415	0.0677622	0.18791	0.141672	0.219329	0.0670157	0.268116	-0.0591589	0.202623	0.136334	0.29192	-0.0205469	0.27298	0.0892747	0.282454	0.00505449	0.306597
CTTTCTGA	0.0643278	0.149589	0.166968	0.182236	-0.0123625	0.0421661	-0.114146	0.0735591	0.0876499	0.0159279	0.360602	0.37157	0.483548	0.475993	0.251408	0.229094	-0.105159	0.0955015	0.115029	0.241078	0.145327	0.185885	0.102215	0.121667	0.16067	-0.12815	0.13135	0.161737	0.152279	0.080965	0.0901929	0.105126	0.131322	0.210361	0.0339693	0.0784087	0.17653	0.10835	0.125207	0.0173714	0.18775	0.039098	0.2112	0.123311	0.220228	0.0684359	0.298305	0.16995	0.158635
AAACAGAA	-0.212726	0.121933	-0.126922	0.116793	-0.213787	-0.0964682	0.0357892	0.267524	-0.0820546	0.203944	0.145119	0.299035	0.482379	0.476331	0.083858	0.221729	-0.117005	0.204781	-0.0539963	0.173155	-0.080887	0.146757	-0.0335294	0.0530385	0.0105031	0.286201	0.277493	-0.0420324	-0.109637	0.0600482	0.173817	-0.00702425	-0.0165535	0.188937	-0.123433	0.0703253	-0.0901678	-0.0707064	0.0848217	0.238062	-0.0359299	0.175127	-0.0823029	0.0162335	0.0119941	0.177794	0.0589998	0.053794	0.126795
AGTCAGAT	-0.0574885	0.0735005	-0.0203564	0.0184133	-0.0831452	-0.138091	-0.141117	0.065446	-0.0858406	0.19597	0.210793	0.291159	0.483024	0.477461	-0.033474	0.291086	0.124928	0.217642	0.0562587	0.178224	-0.141005	-0.0468428	0.0576017	0.168821	-0.040542	0.236561	0.172295	-0.0433868	-0.0733181	0.0314798	0.202893	0.275119	-0.0540499	0.135681	-0.117005	0.0946124	-0.23363	0.0140481	-0.13098	0.235255	-0.0820724	0.0684977	-0.122988	0.2919	-0.0242171	0.175201	0.00372826	0.146717	0.192545
TAATCAGA	0.0237317	-0.0566401	0.0784517	-0.0222872	-0.0488795	-0.154821	-0.0118314	-0.0141148	-0.0130792	-0.0813419	0.258524	0.269667	0.482117	0.478653	0.232702	0.133388	0.0827977	-0.170115	0.0611465	-0.0550566	-0.0101672	-0.0984468	0.030201	-0.154061	0.0257075	0.0323169	-0.0762321	0.139244	0.180452	-0.0729251	0.328512	0.208123	0.272833	0.159021	0.327108	0.267205	0.0819428	-0.198716	0.0910787	0.0027266	0.233334	0.0952552	0.0854256	-0.0670993	0.288822	0.173892	0.155824	0.0828019	0.36353
CAATCAGA	-0.0791363	-0.0828133	-0.0321573	-0.105208	-0.147496	-0.173518	-0.149757	-0.0142182	-0.107417	-0.0230823	0.165397	0.234948	0.483641	0.478883	0.0548888	0.018771	0.067919	0.202525	-0.119997	-0.131336	-0.1383	-0.0724988	-0.0777224	-0.16216	-0.0932104	0.0983337	-0.0676936	-0.0900685	-0.0353127	0.0928972	0.0118927	0.0895135	-0.11798	0.167622	0.018866	0.14696	-0.157187	0.128587	0.184937	0.0243035	-0.188606	0.186837	-0.167778	0.0509081	-0.0575674	0.023343	-0.0821138	-0.14698	0.230228
CTGTCAGA	-0.0530462	-0.0798991	-0.176955	-0.0184708	-0.181531	-0.167572	-0.00905729	-0.0152035	-0.130539	-0.0603023	-0.0149473	-0.0267241	0.482536	0.481105	0.0495923	0.104772	-0.178516	-0.133724	-0.0908717	0.0720468	-0.116115	-0.0998297	-0.12233	0.070135	0.0417125	-0.0159435	-0.0676173	-0.10804	-0.0748354	-0.0753625	0.109822	0.154947	0.0435794	0.0971177	0.0757052	0.181384	0.0281232	-0.201547	-0.0609245	0.0089826	-0.062229	0.125389	-0.0492	0.103774	-0.0740217	0.0614763	-0.047569	0.0929714	0.0529552
GGTTCTGA	0.224951	-0.111862	-0.157675	0.0600944	-0.181816	-0.103574	0.078693	-0.182102	-0.0279081	-0.0192595	0.0722168	0.322996	0.484381	0.48124	-0.0728279	0.141182	0.0191867	-0.109691	-0.0952772	0.0122958	-0.274958	-0.0984623	-0.244855	-0.0775628	-0.164975	-0.0203133	-0.135556	-0.0945548	0.075405	0.226171	-0.0933581	0.0884899	0.249358	0.277975	0.146509	0.130854	-0.064559	-0.0794584	-0.0554536	-0.0429345	0.0315412	0.100241	-0.0199221	-0.0139657	-0.00374148	0.0502508	-0.179588	-0.0202776	-0.0132219
CGTTCTGA	-0.144491	0.0246726	0.052931	-0.00906617	0.107798	-0.0854934	-0.0374014	0.138513	0.0621804	0.104492	0.303435	0.20525	0.48544	0.48043	0.114629	0.118014	0.160051	0.026412	0.00829691	0.0843254	0.0540682	0.0296074	0.00736846	0.0931316	-0.0690051	0.0547285	0.125867	0.118735	0.0854748	0.188196	0.163699	0.205915	0.193867	0.164497	0.207025	0.205148	0.124773	0.149888	0.201046	0.159693	0.192938	0.131842	0.134234	0.203454	0.0936848	0.129071	0.0459778	0.175514	0.253226
ACTTCTGA	-0.0933033	0.0671434	-0.115366	0.0393615	-0.250585	-0.0127823	-0.146725	0.0470839	-0.0038344	0.0290196	0.0276627	0.296181	0.488953	0.484753	0.0483152	0.126876	-0.00892764	0.144161	0.00130986	0.106694	-0.200043	-0.113787	-0.18962	0.14282	-0.0424844	0.0335202	0.0886463	0.00603911	-0.098346	-0.0336983	0.0753894	0.0924801	-0.0171353	0.0133462	-0.0463067	0.243304	-0.162342	-0.0728851	-0.000445343	0.103891	0.306688	0.407512	-0.0867532	-0.00157523	-0.0297249	0.00224894	-0.0168002	0.224979	0.0656703
GCTTCTGA	-0.0869567	-0.202182	0.00661082	-0.190309	-0.0868516	-0.103339	-0.0612607	-0.0285351	-0.000819687	0.0423404	0.191071	0.243109	0.489518	0.484506	0.0718678	-0.0270272	0.176425	-0.0607333	-0.0461414	0.00640932	-0.00261963	0.00954421	-0.0184543	-0.0674768	0.0370963	0.082757	-0.0260326	0.0513908	0.0476187	-0.0787091	0.151397	-0.105306	-0.0970868	-0.165561	-0.0144661	-0.120621	-0.0472861	-0.234008	0.0391137	-0.0861091	0.0319986	-0.0918883	0.0547134	-0.0803614	0.0591396	-0.188273	-0.0315034	-0.177989	-0.00949249
CAGTCAGA	-0.0809806	-0.104479	-0.133536	0.033764	0.0323613	-0.174715	-0.13098	0.0630669	-0.104191	0.043035	0.131157	0.217513	0.49103	0.486106	0.112552	0.216891	-0.099792	0.183596	-0.154668	0.0446287	-0.100656	0.151005	-0.0845032	0.107734	-0.153462	0.177789	0.0805083	-0.0305024	-0.0550178	0.00912955	0.198204	0.308225	0.0886451	0.199156	-0.0644309	0.22468	-0.181248	-0.199568	0.00933303	0.0879137	0.0852216	0.217088	-0.250169	0.173036	0.0284996	0.117902	0.0869837	0.209153	0.182189
ATCAGAAT	-0.0164145	-0.00528835	-0.165758	0.0205629	-0.170115	0.0199016	0.231473	0.225082	0.124221	-0.000396491	0.315725	0.319033	0.492789	0.486324	0.313305	0.308252	0.246129	0.0896073	0.172496	0.126289	0.0467827	0.11619	-0.116685	-0.0463132	0.251305	0.111437	0.198529	0.11847	-0.116558	0.0179421	0.210405	0.122952	-0.0186454	0.0134875	-0.154212	-0.0756538	-0.120135	-0.129585	0.0635001	0.0362759	-0.0797313	-0.0181206	-0.0944251	0.0885816	-0.0190948	0.0256957	-0.103198	-0.000310717	0.19978
TAGTCAGA	0.0818413	-0.198716	0.181931	-0.196658	0.112213	-0.181248	0.0876966	-0.0390279	0.10722	0.0269749	0.387223	0.349697	0.493723	0.491846	0.185394	0.102434	0.185076	0.0993391	0.0984935	-0.00458506	0.0363926	-0.00570049	0.119424	-0.070721	0.118003	-0.00742708	-0.030408	0.0919301	0.189461	-0.118177	0.101565	-0.0923327	0.20391	-0.00251808	0.21906	0.271084	0.204097	-0.0565685	0.0589994	-0.0436149	0.165	0.188386	0.164717	-0.0659603	0.208722	-0.172354	0.0679554	-0.0545114	0.0772793
CGTCAGAA	-0.281816	0.0609751	0.0413925	0.0146071	0.00949394	0.00856419	-0.238091	0.0649993	-0.00364152	-0.0158085	0.129523	0.352492	0.495188	0.493096	0.131722	0.190163	-0.0370014	-0.00648672	-0.0595366	0.0525475	-0.0464835	-0.181816	-0.0785463	0.0929917	-0.0637512	0.0688115	0.107261	0.0616738	-0.0604723	0.0115831	0.283926	0.307276	0.0955271	0.184834	0.033772	0.24174	-0.019287	-0.0563338	0.144122	0.120659	0.249369	0.225844	-0.00298461	0.129888	0.0895272	0.0928871	0.117554	0.212051	0.307371
ATCAGAAG	0.0707884	-0.037697	0.0871808	0.0909131	0.0201483	-0.0597242	0.0490918	0.0377204	0.14066	0.0352464	0.180985	0.383592	0.492461	0.494602	0.130253	0.164319	0.0670161	-0.0770523	-0.00011167	0.105476	-0.025691	-0.0912865	-0.0583904	0.07848	0.170541	0.0336338	0.0861627	0.177878	0.160007	0.0769748	0.327638	0.34391	0.376096	0.3333	0.317123	0.343487	0.0638807	0.0227145	0.157219	-0.0040753	0.148439	0.182932	0.0561084	0.185622	0.200417	0.204825	0.227041	0.234732	0.302968
ATCAGAAC	-0.00479577	-0.0710893	0.134209	0.00576463	0.0660942	-0.140894	-0.182974	0.0448953	-0.15784	0.0436343	0.30963	0.366774	0.496625	0.496407	0.221262	0.259106	0.204605	0.0653832	-0.0235666	0.11213	0.00940492	0.0297816	0.104185	0.0958317	0.0846179	0.156395	0.133001	-0.00223121	-0.0467944	0.0217268	0.0959037	0.226	0.187581	0.172399	-0.0250148	0.277779	-0.0173639	-0.12321	-0.102411	0.118699	0.211417	0.284911	-0.094372	0.229385	0.103225	0.11331	0.0415242	0.151087	0.27509
AATCAGAA	-0.0223681	0.240575	0.0367429	0.120014	-0.0634617	-0.0514695	-0.0926051	0.078243	0.0372834	0.067655	0.276002	0.406882	0.49577	0.495944	0.249223	0.364704	0.221636	0.27335	0.00348281	0.311582	0.0340906	0.11789	0.0771309	0.0740473	0.0657558	0.20529	0.130116	0.14066	0.107417	0.188036	0.119416	0.167662	0.0858696	0.247978	0.0779085	0.272969	0.138364	0.170042	0.148955	0.17284	-0.0912048	0.156761	0.0497343	0.166641	0.0104195	0.100305	0.0806661	0.108073	0.105018
TGTCAGAA	0.106557	0.016898	0.200957	0.0684634	0.126807	-0.0114289	0.0200077	0.0179148	0.157375	0.0973979	0.352473	0.31527	0.495337	0.493949	0.301596	0.375744	0.280484	0.188163	0.143141	0.300871	-0.0676243	-0.00367459	0.0935804	0.10097	-0.104866	0.105513	0.0443177	0.09218	0.0379255	0.0210817	0.139726	0.138554	0.156995	0.0347181	0.120094	0.155936	0.0657669	0.00357034	-0.0030482	0.230812	0.199361	0.110153	0.0805841	0.0631573	0.240553	0.109915	0.0883226	0.0481116	0.143504
ATTCTGAC	-0.0147777	0.0691456	0.16121	0.21413	-0.170333	-0.16925	0.155602	0.27978	-0.129328	0.162717	0.27129	0.344176	0.494026	0.492629	0.342003	0.437844	0.160553	0.206094	0.291273	0.400138	0.029781	0.0423968	0.150939	0.144883	0.0456158	0.200588	0.247804	-0.102273	-0.035785	0.0867622	-0.109637	-0.0166766	-0.0637329	0.190663	-0.0547574	0.115867	-0.0983468	0.0675534	-0.15391	0.230141	-0.134104	0.226256	0.0213934	0.167104	0.0329445	0.191302	0.139148	0.107467	-0.0546564
AAGTCAGA	-0.0844968	0.143757	0.135383	0.143425	-0.102965	-0.0360108	0.200614	0.244904	0.145057	0.185066	0.438524	0.429546	0.498473	0.497958	0.410687	0.430925	0.329598	0.219837	0.248097	0.410102	-0.0259146	0.202861	0.117481	0.232357	0.154224	0.229768	0.236833	0.107207	0.084593	0.101234	0.124925	0.0909076	0.0286059	0.111407	0.0834573	0.101078	0.0618519	-0.0152226	-0.0198456	0.213759	0.153158	0.173116	0.0454041	0.171552	0.117372	0.12558	0.0282104	-0.0141853	0.150615
AGTCAGAA	-0.098651	0.0428733	0.111846	0.0666294	-0.0812231	-0.139469	0.0399196	0.0761219	0.0731232	0.190414	0.415538	0.446357	0.496254	0.496046	0.425923	0.422434	0.415082	0.142689	0.359095	0.407155	0.011418	0.0113536	0.118134	0.113688	0.156297	0.0661006	0.0482806	0.103734	0.103918	-0.0801753	0.214719	0.0845597	0.101565	0.0969085	0.222638	0.211441	0.129356	0.110443	0.148072	0.119953	0.078526	0.201701	0.0939301	0.108006	0.205968	0.121597	0.193455	0.0842154	0.246111
GTCAGAAA	0.142592	0.112878	-0.098493	0.0751279	-0.176195	-0.105849	-0.106148	-0.0232744	-0.00386302	0.0532723	0.353358	0.448097	0.498105	0.497805	0.308666	0.390824	0.320246	0.098523	0.200945	0.405731	-0.309909	-0.201368	-0.161439	0.119042	0.0446085	-0.193181	-0.0644928	-0.114752	-0.170333	0.0730752	0.263684	0.186338	0.0516741	0.0818843	0.309032	0.205599	-0.113966	0.11789	0.139479	0.262945	-0.0903298	0.142371	0.0417035	0.0611923	0.212844	0.203077	-0.0238177	0.193901	0.267888
GGTCAGAA	-0.0894343	0.129777	-0.107007	0.0738998	-0.148812	-0.135164	-0.129158	0.0621501	-0.0845594	-0.0384737	0.366837	0.439271	0.498274	0.49789	0.167021	0.238097	0.0286223	0.0539666	-0.0346682	0.251384	-0.17986	0.0180612	-0.0570939	0.0417778	-0.0640405	-0.0511012	0.106377	-0.0663638	0.00867946	0.13261	0.027005	0.0729354	-0.0583889	0.0731017	0.0771074	0.219374	0.0111144	0.115178	-0.0605771	0.168618	0.0190507	0.217368	-0.0499938	0.00889337	0.0171508	0.153733	-0.0324856	0.16401	0.00922271
CTTCTGAC	0.199303	0.172825	-0.077673	0.0905399	-0.173993	-0.127572	0.139522	0.195314	0.0220908	0.141016	0.344179	0.421036	0.497822	0.497448	0.202897	0.338808	0.165137	0.237006	0.048115	0.338369	-0.112033	0.145118	-0.106449	0.1742	0.206783	0.203424	0.244997	0.0747655	0.0263565	0.208948	0.197925	0.0686733	0.118221	0.275006	0.232453	0.288732	0.122067	0.0224648	0.144989	0.268189	-0.119791	0.1598	0.0543776	0.271312	-0.00760931	0.0329258	-0.0959592	0.0302943	0.133322
GTCAGAAC	0.0192612	0.131087	0.327833	0.0978993	-0.100393	-0.0698536	0.00759325	-0.0115151	0.198331	-0.0146993	0.384496	0.425698	0.48993	0.491158	0.282206	0.370731	0.259045	0.0329624	0.190862	0.266105	0.129719	0.0189633	0.213087	0.0479272	0.143698	0.0296093	-0.0577297	0.172076	0.170912	0.0892261	0.237198	0.340219	0.212672	0.202343	0.118621	0.344121	0.139868	0.0177982	0.0422144	0.0966179	0.278119	0.223112	0.211084	0.140117	0.149552	0.212574	0.20672	0.27535	0.285232
ATCAGAAA	0.0432774	0.260888	0.193906	0.284448	-0.225964	0.0449626	-0.0864645	0.0928332	0.0675207	0.145208	0.341806	0.445477	0.485881	0.485747	0.266374	0.38779	0.289624	0.120104	0.195337	0.367841	-0.0480495	0.0999611	0.181624	0.239331	0.140783	0.144544	0.150326	0.163802	0.0831562	0.0782161	0.232465	0.301115	0.170949	0.242211	0.138326	0.369783	-0.0688679	0.0644726	0.150904	0.0803122	0.120177	0.262271	0.0265955	0.21819	0.12712	0.0997913	0.133598	0.212213	0.177588
GTTTCTGA	0.0244668	0.0957753	-0.0671635	0.0796221	-0.0123253	0.00503221	-0.0790764	0.094337	0.0212264	0.0981491	0.415974	0.459249	0.488402	0.486007	0.0235171	0.182279	0.116746	0.0326747	0.108791	-0.00352592	0.0149061	0.10747	-0.0253107	0.0541688	0.165809	-0.0725277	0.16695	-0.080044	-0.0339842	0.00759588	-0.166959	-0.0549751	0.0239289	0.0982276	0.0679233	0.0130185	0.131693	0.08293	-0.0213233	0.150804	0.0129477	0.0316607	-0.0165523	0.0126538	-0.0241473	0.059778	0.151154	0.045577	-0.0829465
AGACAGAA	0.0839672	-0.0471594	-0.176955	0.0780533	-0.318177	-0.100393	-0.29393	-0.156543	-0.115739	-0.0809747	0.301831	0.487137	0.492614	0.493274	-0.00818454	0.197304	0.0927488	-0.134294	0.106078	0.113484	-0.0842096	0.139641	-0.154061	0.0875568	-0.0355315	-0.107676	-0.00126511	-0.096885	-0.15817	0.137525	0.0801393	0.0363858	-0.218376	0.121207	0.0855911	0.0613351	0.0844076	0.174938	-0.0920323	-0.0720297	0.0161441	-0.132239	0.001143	0.0874621	-0.178781	0.0364251	-0.0711313	-0.0401981	-0.134008
GGACAGAA	-0.0278673	0.21724	-0.267162	0.158138	-0.108884	-0.125259	-0.220551	0.0772783	-0.0709042	-0.00340682	0.226488	0.466763	0.486211	0.486925	-0.205012	0.230217	-0.0196032	0.212045	-0.132883	0.130233	-0.201818	0.126682	-0.18962	0.0177371	0.0550404	0.11746	0.155973	-0.074521	-0.119586	0.213197	-0.0335662	-0.0191144	0.105366	0.242013	0.0230265	0.1221	-0.180967	0.0117603	-0.0319751	0.155604	0.0860032	-0.00476566	-0.0987673	0.10829	-0.0241038	0.146508	-0.0404656	-0.0856995	0.0233389
GACAGAAC	-0.0479836	0.0929425	0.0279184	0.0938646	-0.0825751	-0.0341467	-0.0153456	0.176793	0.0206412	-0.036329	0.345475	0.449595	0.483323	0.482865	0.095422	0.223977	0.0972059	0.214994	0.205709	0.100371	0.29364	0.205548	0.01361	0.0262026	0.167848	0.169899	0.168815	0.0528813	-0.0116442	-0.0278272	0.0124223	-0.0114514	0.0224309	0.162778	0.219359	0.110483	0.0503106	0.136663	0.0731305	0.103625	0.054229	0.0983254	-0.122403	0.0936684	-0.0858296	-0.0436961	0.0605773	-0.0607653	-0.0850664
ATTCTGTC	0.135376	-0.095798	-0.137469	0.0270862	-0.107263	-0.0470472	-0.236957	-0.0641156	-0.0293477	0.0879835	0.412205	0.447441	0.484106	0.479338	-0.0795799	0.21804	0.0988163	-0.132331	-0.0571289	0.231949	-0.158503	0.0530143	-0.209691	-0.0338948	0.12531	0.0976256	0.0189356	-0.0463868	-0.183268	0.0733894	-0.204096	-0.0426345	-0.151856	0.114805	0.00491195	-0.0688051	0.0869202	0.0723561	-0.15376	0.0184389	-0.126841	0.126309	-0.226922	0.0283184	-0.184771	0.0790591	-0.100877	0.061121	-0.272354
GGGCAGAA	0.129964	0.258375	0.345809	0.351426	0.139713	0.07215	0.11435	0.276206	0.261684	0.128231	0.412557	0.453098	0.477831	0.472644	0.348619	0.387968	0.0921608	0.271839	0.320116	0.354369	0.25731	0.108606	0.301682	0.328556	0.225085	0.0942615	0.258717	0.21487	0.238417	0.120743	0.237892	0.21586	0.216473	0.28277	0.113106	0.22416	0.309163	0.137921	0.260869	0.169568	0.166235	0.225393	0.294606	0.249269	0.320424	0.29265	0.335668	0.259336	0.158802
AACAGAAA	0.0455785	0.0738902	0.149278	0.0355447	-0.0773568	0.193651	-0.0161694	-0.146725	0.00822973	-0.0625116	0.462751	0.470287	0.485939	0.481347	0.23435	0.210644	0.206935	-0.0883691	0.0421969	0.0554677	0.19203	0.0749962	0.129027	0.165102	0.160193	-0.172816	-0.0253807	0.126975	0.0496283	-0.00395706	-0.0694298	0.0564831	-0.0326845	0.0218721	0.0810136	0.107974	-0.00534077	0.111215	0.117565	-0.135655	0.0917997	0.00245891	0.0546903	0.0113079	0.0479865	0.137189	0.156257	0.15914	0.0227316
GACAGAAA	-0.0644271	0.13724	0.254925	0.21901	-0.0108339	0.105952	0.0495456	0.0526301	0.0747451	0.12423	0.431683	0.422306	0.48567	0.482928	0.170194	0.163025	0.141456	0.0463567	0.229526	0.250692	0.239016	0.0886106	0.275243	0.13008	0.286126	0.108855	0.233647	0.108086	0.265772	0.153277	0.211609	0.190736	0.30087	0.2715	0.0249914	0.0968216	0.146253	0.0505856	0.197341	0.0347209	0.052317	-0.00926752	0.0897681	0.149192	0.241851	0.149283	0.228269	0.122397	0.259232
GAACAGAA	-0.0835528	-0.155752	-0.166959	-0.110237	-0.164975	-0.348812	-0.234294	-0.152143	-0.0486829	-0.103716	0.337405	0.410212	0.480669	0.484708	-0.110403	-0.0370265	0.00771472	-0.146597	-0.0571867	0.0673456	-0.138722	-0.0647331	-0.0613408	-0.0407907	-0.0724673	-0.221753	-0.0865456	-0.180967	-0.12815	-0.0532038	-0.257025	-0.167985	-0.232975	-0.165365	-0.0115143	-0.122475	0.166419	0.165326	-0.186967	-0.0290138	-0.0115369	-0.0678236	0.0438531	-0.0194447	-0.0694371	-0.259007	-0.117134	-0.0843163	-0.133255
CTTCTGTC	0.0433545	0.0662182	0.116619	0.071319	0.0382145	0.0493266	-0.0111421	0.0918179	0.0904221	-0.0673113	0.0966804	0.291394	0.485927	0.488909	0.1389	0.252173	0.200249	0.127859	0.0478829	0.253772	-0.0842154	0.00405474	0.0407429	0.168583	0.190956	0.198589	0.162211	0.20531	0.0358321	0.119813	0.33608	0.307621	0.278081	0.28712	0.279158	0.278144	0.120659	0.1946	0.248519	0.193972	0.0574082	0.103699	0.100945	0.217197	0.126107	0.187766	0.151927	0.180554	0.360873
AGTTCTGA	-0.0229462	-0.111748	-0.156703	-0.155909	-0.353018	-0.327572	-0.213608	-0.0834459	-0.142251	-0.106449	0.226219	0.318477	0.489259	0.492072	0.180658	0.259075	0.0398242	-0.0206193	0.0758487	0.223092	-0.246092	-0.191364	-0.156703	-0.163827	-0.190658	-0.0548886	-0.0747135	-0.264397	-0.23279	0.00962699	-0.0370277	0.0155437	-0.114026	0.00242582	0.0278468	0.157073	0.251559	0.374531	0.251363	0.439892	-0.293554	0.0919394	-0.0669643	0.075191	0.248978	0.342454	-0.109151	0.0417847	0.0684766
AGGTCAGA	0.00399571	-0.0654021	-0.118509	0.0282334	-0.227901	-0.0521806	-0.184771	-0.2098	-0.346344	0.0444558	0.2069	0.19095	0.480341	0.480207	0.0413237	0.157598	0.0225614	-0.118046	0.0635379	0.0857104	-0.251713	-0.210624	-0.0506304	-0.0886525	-0.190658	-0.23439	-0.291009	-0.340671	-0.121896	-0.159346	-0.060029	-0.0982858	-0.0507291	-0.115864	0.278409	0.0666535	-0.152578	0.0233524	0.0787027	0.433314	-0.11891	0.0987501	0.102781	-0.103621	0.0224315	0.0387313	0.0382157	0.104037	-0.110624
GGGTCAGA	0.0678971	0.182449	-0.0149959	-0.112436	-0.0254396	-0.258503	0.0446144	0.118257	-0.0285666	-0.0173604	0.265153	0.259272	0.470479	0.478386	0.0624183	0.262165	0.028422	-0.0201476	0.00176126	0.207915	-0.204721	-0.121042	-0.0192266	-0.0421832	0.0479719	0.0503222	-0.0542438	0.0487851	-0.0899082	0.142616	0.0624505	0.27848	0.0191901	0.0349898	-0.00952607	0.208007	-0.0117406	0.194905	0.182121	0.419532	-0.0342187	0.0388318	-0.00160509	0.0240592	0.156895	0.261673	-0.0446355	0.0576014	0.265699
GGTCAGAC	-0.13851	-0.101954	-0.358336	-0.162525	-0.179317	-0.04605	-0.257025	-0.196257	-0.364975	-0.126922	-0.0321382	-0.0305028	0.472637	0.480445	-0.211126	0.0264364	-0.193181	-0.220273	-0.210679	-0.0606291	-0.293554	-0.322915	-0.325964	-0.26073	-0.297881	-0.248945	-0.32668	-0.347756	-0.347496	-0.348812	-0.264207	-0.0605401	-0.366154	-0.19431	-0.161798	-0.0631747	-0.308831	-0.102503	-0.226122	-0.00319726	-0.335952	-0.155909	-0.32426	-0.295468	-0.319791	-0.146092	-0.19393	-0.109583	-0.29431
CCTCTGAC	0.149422	0.151216	0.0588962	0.0819283	-0.223732	-0.220135	0.053093	0.100425	-0.00783213	0.0245203	0.222284	0.338537	0.475174	0.484149	0.0343153	0.239148	0.138622	0.116106	0.0229362	0.157373	-0.0977844	0.085065	0.0336187	0.0636897	0.140175	0.202788	0.148922	0.0399898	0.0558479	0.264435	0.130686	0.247975	0.314407	0.372999	0.0298755	0.29241	-0.00188757	0.0715082	-0.0153583	0.133946	-0.0762632	0.102472	-0.182102	0.207724	-0.00726758	0.144586	-0.0409619	0.092196	0.184403
TCAGAACA	-0.0797011	-0.240121	-0.323508	-0.150724	-0.177469	-0.0762132	-0.281531	-0.198716	-0.324489	-0.151856	0.00387366	0.0498656	0.4792	0.485327	-0.0831579	-0.0370999	-0.066323	-0.0674236	-0.0538129	3.34278e-05	-0.300833	-0.308407	-0.263264	-0.110018	-0.335754	-0.206449	-0.197062	-0.330627	-0.192445	-0.136351	-0.268194	-0.116558	-0.297881	-0.166959	-0.106803	-0.0321634	-0.266555	-0.146852	-0.144977	0.08533	-0.204576	0.00921506	-0.174715	-0.110958	-0.274958	-0.101818	-0.216178	-0.0702005	-0.180688
GCTCTGAC	-0.171897	-0.213549	-0.2284	-0.227901	-0.377469	-0.140894	-0.379588	-0.29431	-0.351999	-0.137675	0.0669963	0.170484	0.48231	0.489821	0.0285432	0.097402	0.0230797	-0.219314	-0.00530135	0.178062	-0.226281	-0.261618	-0.14698	-0.258503	-0.150307	-0.185078	-0.334008	-0.311577	-0.142829	-0.0187984	0.12805	0.226001	-0.216941	-0.111919	-0.0647497	-0.015766	-0.0285052	0.0864728	0.0552959	0.306511	-0.327409	-0.188941	-0.276195	-0.186967	-0.0384885	0.258119	-0.0248644	0.0935943	0.167105
CTCTGACC	-0.0139027	-0.0154413	0.0261322	-0.286328	-0.27986	-0.0276845	-0.317783	-0.130539	-0.264207	-0.17167	0.0961008	0.269285	0.483977	0.489695	0.216914	0.256267	0.270741	-0.124489	0.172105	0.258011	-0.103953	-0.3266	0.0887302	-0.283565	0.0103348	0.027314	-0.28729	-0.316304	-0.170997	-0.0646018	0.0128223	-0.132975	-0.0997238	-0.149349	0.0452289	0.0385416	-0.161618	-0.109691	0.0910951	-0.0113263	-0.123508	0.0667815	-0.202273	-0.114569	0.0666562	-0.116115	0.0734743	-0.0537749	0.0998774
GTCAGAGA	0.0220911	-0.0360501	-0.0700652	-0.0666458	-0.106098	-0.0706547	-0.150585	-0.0515934	-0.219179	-0.15867	0.0648533	0.236322	0.487869	0.487983	0.230727	0.210929	0.189216	-0.0807483	0.207208	0.219168	-0.0594096	-0.210902	-0.0611086	-0.0112544	0.009511	-0.0345123	-0.0873352	-0.212784	-0.0868093	-0.0812606	-0.175203	-0.118709	-0.0850624	-0.0858412	-0.0376936	0.043471	-0.198716	0.00749743	-0.0234183	0.0234916	-0.218575	0.0213468	-0.100218	0.0153426	-0.0148464	-0.000307349	-0.105404	0.0190874	-0.161618
AGTCAGAG	0.00584294	0.168958	-0.119179	0.0302689	-0.0735846	-0.113727	-0.148017	0.0308704	0.0879083	-0.0350512	0.210234	0.308635	0.485235	0.488238	0.163971	0.3796	0.201043	0.171239	0.0423837	0.348102	0.00668494	-0.07809	-0.0680163	0.00497001	0.00528528	0.074951	0.100439	0.0315239	-0.00633053	0.0833278	0.109817	0.0379397	0.0948585	0.087015	0.147292	0.263433	-0.0461563	0.136236	0.179303	0.0773452	0.030549	0.140022	-0.105601	0.232572	-0.133913	-0.0266325	0.0455837	-0.103574	0.112642
ATGTCAGA	-0.186012	0.0834321	-0.0551003	-0.0285188	-0.220343	-0.0667939	-0.217005	0.044293	-0.09577	0.0175059	0.208617	0.188978	0.486323	0.485732	0.0992273	0.236185	-0.0155602	-0.108725	0.067184	0.244682	-0.121396	-0.117783	0.0155843	0.101197	-0.021814	-0.0477988	-0.0138766	-0.0459649	-0.163827	-0.0716622	-0.154061	-0.203198	-0.105061	-0.0519197	-0.077712	0.0556681	-0.20846	-0.0184371	-0.0169499	0.0724184	-0.0514172	0.15188	-0.211862	0.0319436	-0.132239	0.0859171	-0.14034	-0.0403727	-0.0285195
GAGTCAGA	-0.0295033	-0.0202955	0.0140926	-0.0248664	0.123826	-0.208566	-0.0316633	0.0329101	0.00719037	0.141274	0.00425472	0.15834	0.481345	0.484592	0.139816	0.194584	-0.0638146	0.0412985	-0.0187984	0.0587494	-0.0622872	-0.0172548	0.0227569	0.120403	-0.037515	0.0329711	0.0265846	-0.0662134	-0.0290467	-0.0925293	0.0923306	0.00808767	0.0637373	0.142782	-0.0515723	0.176269	0.00589758	-0.149485	-0.0946361	0.00874726	0.144239	0.309972	-0.0386999	0.0463673	0.1392	-0.00859765	0.0747966	0.0639054	-0.00722074
AAATCAGA	-0.087707	0.0731146	-0.190309	-0.0922967	-0.0136589	0.114072	-0.103953	-0.118442	-0.0862339	-0.0912353	-0.0209507	0.235681	0.480885	0.482192	-0.0119026	0.171485	-0.278781	0.00274723	-0.153313	-0.0119698	-0.209366	-0.102549	-0.288273	-0.0378579	-0.184466	-0.105306	-0.117522	-0.241341	0.0609702	0.157545	0.203008	0.327705	0.139234	0.277807	0.180944	0.289883	-0.293554	-0.157675	-0.185387	0.103341	0.140843	0.153155	0.0436479	0.110844	0.177797	0.310464	0.307441	0.362641	0.287453
CGATCAGA	0.028079	0.163231	-0.105159	0.00435658	-0.0286085	0.0289798	-0.101055	0.0824442	0.043789	0.050922	0.295415	0.36919	0.487158	0.49065	0.161808	0.325043	0.159199	0.134056	0.0012547	0.347219	-0.184771	-0.0986724	-0.17986	0.107508	-0.0528961	0.0693539	-0.0155292	0.0142319	0.0470677	0.279411	0.0279315	0.236619	-0.0961678	0.0600137	0.12906	0.230934	-0.0639856	0.0538431	0.0340685	0.289817	0.0880922	0.101437	-0.00318085	0.114775	0.0183007	0.219121	-0.0617533	0.118732	0.101643
CGGTCAGA	-0.0967409	0.230975	0.0227928	0.207324	0.0971481	0.063718	0.0691683	0.197848	0.0936653	0.0326907	0.269061	0.43391	0.496746	0.496845	0.22948	0.408247	0.123952	0.0321023	0.0745911	0.362859	-0.0548373	-0.023034	-0.0823067	0.281686	0.0142401	0.0614022	0.184775	0.134608	0.181782	0.183559	0.402936	0.425225	0.290168	0.350737	0.256305	0.36118	0.0455336	-0.055122	0.105768	0.0829413	0.228511	0.273158	0.0876522	0.326368	0.20985	0.334382	0.237217	0.395065	0.402062
GATCAGAA	-0.225493	0.14741	0.0431239	0.183658	-0.0554863	0.150145	-0.0347635	0.122963	0.0339109	0.123271	0.0977782	0.291402	0.485145	0.48349	0.0282468	0.337569	-0.0220878	0.101787	-0.0402143	0.181776	-0.0465843	-0.0712442	-0.0549922	0.193734	-0.0352081	0.232474	0.153352	0.0741232	0.134389	0.127905	0.31309	0.349407	0.351536	0.349189	0.156232	0.287881	-0.0813281	0.0250389	0.110157	0.209439	0.05242	0.321487	0.347219	0.374363	0.381956	0.437158	0.343171	0.333658	0.375066
AGATCAGA	-0.0166907	0.0709674	-0.0600022	0.0818198	-0.0558537	-0.119518	0.0282965	-0.0783707	-0.0272074	0.068489	-0.0105114	0.210435	0.479854	0.47661	0.0830471	0.176774	-0.133348	-0.0446878	0.0922921	0.0720468	-0.289279	-0.131876	-0.168403	0.00536515	-0.14908	-0.0115163	-0.0859863	-0.115366	0.051712	0.176257	0.222885	0.37114	0.101425	0.231088	0.234055	0.179195	-0.0294804	0.0188418	-0.205849	0.0732744	-0.0159654	0.17753	0.250131	0.159224	0.255147	0.29496	0.30689	0.331845	0.366347
CTCTGATC	-0.250585	-0.0761272	-0.139041	-0.00573284	0.0260743	-0.0149839	-0.0982641	-0.0228907	0.0322595	-0.0213877	0.0125952	0.10433	0.464675	0.475878	-0.130627	0.1298	-0.175696	-0.0274992	-0.155129	-0.067835	-0.0589471	-0.0981187	-0.128483	-0.0401903	-0.150307	0.0705504	-0.0816334	-0.092422	0.12358	0.100897	0.418784	0.442032	0.298054	0.377445	0.276884	0.338429	-0.188941	-0.280688	0.0114908	0.0275843	0.195607	0.307584	0.171883	0.178665	0.297726	0.382585	0.443439	0.449672	0.432616
ATCTGATC	0.166984	0.0400491	0.0413402	-0.058562	0.0292288	-0.207058	0.195122	-0.0609199	-0.0772826	0.0150349	0.340127	0.327407	0.489667	0.491864	0.27495	0.157301	0.299838	-0.160206	0.187342	0.28165	-0.0155713	-0.220691	0.0794419	-0.0745172	0.196227	-0.115428	-0.183863	0.208649	0.0401269	-0.025713	0.452997	0.450344	0.160501	0.0732483	0.165729	0.104036	0.025702	-0.219997	0.15511	0.011493	0.0692345	-0.0141516	0.0804027	-0.153611	0.302585	0.210217	0.242495	0.203787	0.456177
TCTGACCA	0.0258622	0.222765	0.143277	0.149767	0.132266	-0.0534205	0.106307	0.0158166	0.0306133	-0.0389818	0.397079	0.392448	0.47409	0.475233	0.140126	0.146995	0.190975	0.0355832	0.113203	0.255683	-0.078063	-0.0720527	0.191981	0.164934	0.124285	0.0929307	0.0904552	0.145735	0.149567	0.20157	0.415185	0.423665	0.285681	0.280913	0.220719	0.304829	-0.00620039	0.0138814	-0.00742755	0.106453	0.193026	0.152117	0.350913	0.200402	0.301667	0.346742	0.184397	0.35346	0.417777
GACCAGAA	0.0182106	-0.103668	0.17168	0.0166606	-0.122621	-0.0753162	0.0243053	-0.159346	0.183732	-0.0998712	0.22511	0.256752	0.476263	0.474123	0.146238	0.0702599	0.0517908	0.0477315	-0.0847042	-0.035512	0.132718	-0.0884563	0.0350788	-0.147366	0.12534	0.145972	-0.0952219	0.147459	0.116943	-0.0711098	0.30632	0.375504	0.18309	0.13814	-0.0382082	0.235123	-0.0155507	0.002869	0.218549	0.153477	0.172454	0.232079	-0.000783191	0.0222902	0.0815858	0.0400491	0.256178	0.0822934	0.122367
TATCAGAA	-0.080047	-0.183565	-0.200524	0.0147197	-0.14908	-0.0807237	-0.0722898	-0.19393	-0.144249	-0.128233	0.0511577	0.0805081	0.472349	0.472412	0.0355455	-0.0411885	0.0370933	-0.202965	0.0353376	-0.0844075	-0.19431	-0.0211224	-0.128067	-0.0244538	-0.210568	-0.0809128	-0.13439	-0.127003	-0.0391216	0.0507832	0.334076	0.299364	0.200911	0.190586	0.362381	0.222162	0.0398417	0.0105381	-0.0739311	-0.132883	0.129293	0.214862	-0.00518184	0.0277613	-0.0707726	0.198206	0.164463	0.246476	0.381235
GGATCAGA	-0.000295061	-0.0713373	-0.0978017	0.0128165	-0.079271	-0.0660469	0.00864086	-0.0947722	0.00462723	0.106571	0.0801752	0.239846	0.472546	0.472257	0.157072	0.0390714	-0.14168	-0.050176	0.0205578	0.0927564	-0.216052	-0.104287	-0.277989	-0.0500181	-0.227409	0.0313672	-0.0667941	-0.0441916	-0.00662233	-0.0214393	0.212619	0.182597	0.114361	0.120624	0.131394	0.269744	0.036475	-0.0940868	0.176103	0.086245	0.137384	0.210787	0.139602	-0.0366017	0.172171	0.154021	0.0440564	0.107523	0.198997
GATCTGAC	-0.0772965	-0.140782	-0.0088477	-0.126201	-0.3	-0.119791	0.0135549	0.0996641	-0.0813626	-0.0251796	0.14876	0.0412891	0.475427	0.471957	0.0380863	0.163785	0.156817	-0.0991042	0.0452584	0.114661	0.0743163	-0.0823605	-0.0366303	-0.0493335	0.135437	-0.180688	0.0245195	0.0737349	-0.14698	-0.0880213	0.00129329	-0.170553	-0.208725	-0.254975	-0.200524	-0.118842	-0.282102	-0.133819	-0.156864	-0.092953	-0.0737594	-0.0638949	-0.050224	-0.022684	-0.136151	-0.136653	-0.191721	-0.206198	0.00786322
AGTCAGAC	0.0855507	0.0241817	-0.131966	-0.0880754	-0.174473	-0.119654	-0.168194	0.00420003	-0.214448	-0.00939231	0.0581148	0.085674	0.476812	0.475218	0.0654197	0.118741	0.0885667	-0.0966588	-0.0814398	0.0764052	-0.279317	-0.117134	-0.0858704	-0.0683591	-0.152871	-0.206298	-0.140121	-0.234486	-0.198716	0.0264569	-0.120831	-0.066897	-0.201011	-0.0331367	0.0714707	0.071412	-0.225649	0.0819186	0.00725021	-0.0691707	-0.0323879	0.140501	-0.177211	-0.0939355	-0.124642	-0.0678903	-0.122113	-0.127165	0.0178062
CTCTGACA	0.345384	0.40904	0.19725	0.211124	0.0272045	-0.229757	0.0274717	0.0679762	0.112636	0.0414307	0.122245	0.263332	0.475011	0.477703	0.21033	0.301956	0.22758	-0.0278588	-0.118575	0.321847	-0.0186777	-0.0374487	0.110708	0.116969	0.160302	-0.0291774	0.0257744	0.210641	0.0689642	0.0310435	0.170209	0.101116	0.0087582	0.0667688	0.271192	0.306947	0.0909155	-0.0332005	0.161736	0.228957	0.0888995	0.156905	0.141802	-0.0931158	0.115512	0.0137489	0.0397259	0.0337837	0.138641
GTGTCAGA	-0.00394517	0.212223	-0.0596519	-0.0282878	-0.272125	-0.073038	-0.0426329	0.00989685	-0.0159571	-0.109637	0.328956	0.349578	0.47699	0.475799	-0.0025744	0.0774199	-0.012818	0.00649867	-0.003116	0.0894435	0.0945432	-0.0372773	-0.0386816	-0.0660046	0.0555616	-0.104818	0.0843111	0.0507329	0.1782	0.175527	-0.0243739	0.17796	0.141895	0.32766	-0.0199769	0.0876287	-0.0472096	-0.0128296	-0.210679	0.0611903	-0.0307884	0.0602209	0.00680934	0.0591706	0.0395488	0.0623711	0.0655555	0.147669	0.0341387
AACAGAAC	-0.108991	0.106715	0.091757	-0.087185	-0.0432788	-0.248545	0.0975673	0.11311	0.138505	0.0309401	0.249074	0.182289	0.476704	0.472426	0.190913	0.227048	0.201349	0.081535	0.00710078	0.206917	0.14031	-0.152433	0.140517	-0.0785424	0.259266	-0.0477024	-0.0547517	0.206995	0.101293	0.125226	0.140119	0.0490201	-0.0484685	-0.0048678	-0.0129813	0.119122	-0.130627	0.14963	0.107139	0.109769	-0.0866088	-0.0372063	0.0543505	0.00299071	0.0891429	0.101139	-0.0475655	-0.212552	0.228875
AGTCTGAC	-0.16517	-0.0154824	-0.00801289	0.0485944	-0.0397079	-0.138616	-0.174473	0.0784871	0.101884	0.0457868	0.0536156	0.127295	0.477346	0.470892	0.0786034	0.105426	-0.119246	0.0214422	0.061414	0.0301149	-0.0974264	-0.0204887	-0.0783227	0.0982203	-0.174958	-0.0329043	-0.00745136	0.125326	0.0749962	0.0286854	0.139895	0.191209	0.16899	0.209493	0.275941	0.276122	0.0535777	-0.101189	0.0358613	-0.0570206	0.144539	0.0512676	0.0342496	0.0766072	0.0712824	0.112555	0.0946293	0.144665	0.213046
CATCAGAA	-0.202641	-0.0545788	-0.180967	0.03648	-0.0739394	-0.193181	-0.114874	-0.101502	-0.151999	0.0570718	-0.130016	-0.06222	0.476886	0.470356	-0.0165082	0.191433	-0.11986	-0.0761259	-0.0781601	0.000118011	-0.18729	-0.10511	-0.231785	0.0518096	-0.137469	0.0466585	0.0115521	-0.0406708	-0.146092	-0.1065	0.246192	0.0925679	0.0180608	0.0846808	0.0615423	0.117846	-0.227491	-0.195468	-0.0779173	-0.00868397	0.0421234	0.160989	-0.134199	0.0502961	0.0594437	0.110806	0.00427424	0.0583053	0.0952426
AATCAGAG	0.00774151	0.000865807	-0.0477962	0.210088	0.0536157	0.0498847	-0.295468	0.0405585	-0.267985	0.0474241	0.0822903	0.152345	0.478334	0.467009	0.107557	0.239949	-0.0251562	0.173707	0.0777954	0.173731	-0.228904	-0.0921703	-0.0184174	0.214636	-0.225964	0.0591303	0.0433509	-0.184771	-0.112552	0.03026	0.0874194	0.203606	0.000475674	0.20669	-0.0145358	0.183743	-0.0931295	-0.103292	-0.106098	0.294286	-0.0262342	0.274391	0.00792941	0.0877223	-0.031181	0.176439	0.011091	0.10852	0.142621
GATTCTGA	-0.11986	-0.0172737	0.0908539	0.0681911	-0.131785	-0.156864	0.0303099	0.00927897	0.161725	0.053733	0.113663	0.195897	0.477369	0.465069	0.173234	0.164771	-0.0150397	0.125444	0.21955	0.154847	0.177896	0.131549	0.0494475	0.10251	-0.0113543	0.247784	0.167133	0.152256	0.0371818	-0.0382128	0.20788	0.192642	0.207693	0.100427	0.0880564	0.201302	-0.0824944	-0.018571	-0.0127	0.0459242	0.200673	0.207786	-0.147886	0.0819883	0.0740065	4.93946e-05	0.0231299	0.109885	0.104996
CATTCTGA	-0.0493311	0.158299	0.0384374	0.0881565	0.0262877	-0.25817	0.0619278	0.180495	0.0320774	0.11802	0.146673	0.21488	0.476801	0.462885	0.151079	0.281055	0.236181	0.332943	0.000454749	0.04141	0.0257301	0.154547	0.0209229	0.00138711	-0.0231608	0.162615	0.122903	0.122953	0.0814807	0.178181	0.0203813	0.205614	0.0948731	0.213594	-0.112901	0.172955	-0.0268673	0.0580409	0.113527	0.132999	0.184036	0.0971473	0.0348277	0.0991935	0.205611	0.130275	0.0330978	0.171538	0.116359
TATTCTGA	-0.0237952	-0.000633941	-0.0274836	0.00706521	-0.12668	-0.0535633	-0.0468816	0.0770818	0.0745806	0.0874278	0.243973	0.245273	0.475234	0.465979	0.181871	0.0921727	0.00596198	0.0901982	-0.0404853	0.000751948	0.0412081	0.0993902	0.0454469	0.0719322	-0.0759543	0.185729	0.0961657	-0.048037	0.0744885	-0.0867001	0.132646	0.0649109	-0.0151686	0.0665465	0.173344	0.145994	0.0389731	-0.0941604	0.0304335	0.229025	-0.000539737	0.17182	-0.0486473	0.1275	0.0835856	0.0266897	0.256815	0.0339305	0.135649
GTCAGATA	0.212095	0.0308442	-0.073505	0.0938024	-0.364589	-0.177989	-0.172584	-0.212321	-0.204528	-0.143533	0.218196	0.37352	0.468547	0.463686	-0.00291893	0.132136	-0.00352422	0.00578938	-0.036954	0.0707524	-0.156864	0.0211396	-0.223136	0.071595	0.0095655	-0.134104	-0.0518879	-0.175945	-0.234104	0.0542545	-0.207883	-0.248678	-0.191364	0.0719379	-0.0547543	-0.0178679	0.275593	0.367029	-0.172584	-0.0345953	-0.128483	-0.197881	-0.113847	0.0773617	0.0560126	-0.0210088	-0.0903678	-0.0457329	-0.188606
AGGACAGA	-0.0104392	0.37914	0.0116527	0.0675658	-0.173993	-0.189963	-0.122548	0.0734157	-0.0730247	0.0397486	0.227679	0.378677	0.465091	0.465598	0.00333691	0.091143	0.18809	0.267516	0.0328629	0.189817	0.0864455	0.21203	-0.0433706	-0.0270521	0.232872	0.192973	0.176016	0.0134424	0.190248	0.329652	-0.0539334	0.0309892	0.305079	0.426455	0.0924962	0.215541	-0.151004	-0.00774224	0.012157	0.126902	0.0762985	-0.0531741	-0.160906	0.0315711	0.083053	0.201268	0.0586281	0.11984	0.0377549
ACAGAACA	-0.0988793	0.0860022	0.0816051	0.075604	0.0773494	-0.0409491	-0.00731443	0.0865387	-0.0654856	0.125294	0.296983	0.35604	0.465688	0.465112	0.051912	0.176302	-0.0361383	0.0292981	0.0252381	0.195202	-0.297062	0.0118279	-0.0123093	0.0679845	0.0747203	-0.112843	0.161472	-0.00168814	0.00922243	0.0913933	-0.0548537	0.135804	0.0870017	0.125917	-0.0807346	0.206917	-0.0801761	-0.0201088	-0.16517	0.0917967	0.189855	0.364594	0.0758794	0.0176266	0.0855069	0.132943	0.110581	0.20215	0.0377152
AGCAGAAC	0.0842898	0.0589391	-0.190658	-0.0346423	-0.132239	-0.0594188	0.0135184	-0.0558094	-0.111577	-0.128316	0.199069	0.317509	0.466471	0.466497	-0.051612	0.0535897	0.0356633	-0.116052	-0.111634	0.0884516	-0.274473	-0.0535701	-0.125414	-0.00803446	-0.000666916	0.0611123	0.073386	-0.0327892	-0.165561	-0.146218	0.242865	0.27137	0.0427513	-0.0531177	0.107936	0.0351146	-0.243415	-0.237675	-0.12321	-0.0482004	-0.029751	0.251485	-0.0712738	0.187791	-0.196658	-0.0471189	-0.00855521	0.0800315	0.238727
CAGAACCA	-0.190309	0.0707219	-0.233161	-0.0679559	-0.226841	0.0539465	-0.233442	-0.0672735	-0.167572	-0.015531	0.0701451	0.341271	0.468679	0.460937	-0.203105	0.072856	-0.0588146	-0.0972809	-0.234582	0.10933	-0.144129	-0.144733	-0.275945	0.0552776	0.000810727	-0.0818225	-0.00101259	-0.156703	-0.0998214	0.0100722	-0.156225	-0.18729	-0.045151	-0.228067	-0.083833	-0.118442	0.0453709	0.211926	-0.238828	0.0352953	-0.229499	-0.111126	-0.00327446	-0.0335116	0.0610128	-0.142136	-0.130539	-0.0582425	-0.0698406
CTCTGTCC	-0.112436	0.0524429	-0.125649	0.0878152	-0.0137289	-0.155129	-0.189279	-0.0399897	-0.00512737	0.0505625	-0.0163975	0.364294	0.472208	0.451913	0.0108977	-3.70611e-05	-0.216431	-0.107727	0.0235053	0.143153	-0.0841143	-0.21549	-0.2451	0.0382692	-0.0128005	-0.19393	-0.0226855	-0.0608065	-0.00680832	0.0999117	0.111798	0.104703	-0.163264	0.050439	-0.222257	0.0564679	-0.155129	-0.0256656	0.0364656	-0.0682938	-0.0100993	0.0326653	0.0166777	0.000410546	0.0666504	0.0640559	-0.052244	0.0396591	0.0616213
CAGAAGAC	0.153662	-0.0552599	0.0777684	0.0285677	0.0498585	-0.0695059	-0.0667317	0.039776	-0.0218148	-0.19914	0.256145	0.193967	0.480409	0.42037	0.113286	0.0771563	0.121894	-0.0352345	0.144802	0.065332	0.0425502	-0.132057	0.00512764	0.0309895	0.0490172	0.065842	0.0875903	0.0206572	-0.0836898	-0.054452	0.051785	0.0517049	0.0358291	0.0658943	0.019231	0.144066	-0.105355	-0.140894	-0.108407	0.107912	0.240584	0.390245	-0.0611746	0.17495	0.0419992	0.0870803	0.0739597	0.0268461	0.171715
CAGAATCA	-0.0865437	-0.00998924	0.0262508	0.089353	-0.160906	-0.200833	-0.0943617	0.0465872	-0.120343	0.0644183	0.124241	0.159973	0.463898	0.440561	0.0432057	0.0929027	0.050529	0.0792169	0.116474	0.0460507	-0.0340437	-0.08799	0.138932	-0.0722134	0.0888974	-0.0851006	0.0293667	-0.162893	-0.0923436	-0.107007	0.0750323	0.0549546	-0.0220013	0.0434422	0.178902	0.178344	-0.0954536	-0.0773991	0.0474869	0.237887	0.000776271	0.193975	-0.0737027	-0.0398061	-0.00548181	0.0118101	0.119465	0.0435781	0.215479
CATCTGAC	-0.121183	0.0660613	0.0440721	0.0448803	0.195011	-0.0916343	-0.0598129	0.107921	0.105816	0.0241904	0.190447	0.155821	0.460075	0.444213	0.113316	0.0789776	0.055429	0.210427	0.0593531	-0.103433	-0.0318738	-0.231605	0.0885433	0.128487	-0.0256391	0.145576	0.0538652	0.0312189	0.0927528	-0.00150184	0.232111	0.114996	0.158521	0.17651	0.13621	0.10949	0.0122765	-0.0970896	-0.128819	0.249826	0.146864	0.321065	0.0242192	0.0744555	0.108693	0.0484404	-0.033644	0.166472	0.259805
AATCAGAT	-0.223136	-0.214813	-0.224185	-0.0552211	-0.236957	-0.0865272	-0.201682	-0.0459907	-0.125649	-0.1011	0.0222119	0.170135	0.459017	0.441888	-0.259007	-0.0581656	-0.296658	-0.0700153	-0.234104	-0.0996811	-0.242597	-0.235853	-0.203198	0.00318308	-0.0229403	-0.0991017	-0.0613162	-0.15867	-0.196257	-0.14168	-0.164397	-0.198716	-0.216368	-0.11831	-0.0303271	-0.197469	-0.221538	-0.153611	-0.108831	-0.08051	0.0392772	0.203523	-0.155284	-0.0367251	-0.0825295	-0.0322373	-0.204576	-0.0763319	-0.0134428
AGCAGAAG	0.157062	0.143801	0.304311	0.165284	0.0615045	-0.0198476	0.125947	0.0755989	0.226082	-0.0329121	0.31714	0.232294	0.455954	0.437254	0.26843	0.129092	0.173001	0.0134409	0.25244	0.168997	0.281876	0.107527	0.280078	0.105944	0.233991	-0.0256976	0.0546664	0.191484	0.362545	-0.0143355	0.305922	-0.0924114	0.252245	0.0525506	0.0863667	0.0660923	0.354485	-0.0788332	0.249862	0.200924	0.352488	0.0827159	0.307703	0.122714	0.343627	0.0632516	0.324472	0.0245316	0.327919
CAAACAGA	0.202766	0.219407	0.351886	0.239407	0.233585	-0.0224703	0.153867	0.308025	0.222235	0.133038	0.432206	0.363356	0.458597	0.44077	0.415135	0.319115	0.189691	0.205702	0.354238	0.299429	0.182597	0.174493	0.333957	0.195904	0.23906	0.0957472	0.292973	0.206211	0.214795	0.0401422	0.115655	-0.034516	0.107352	0.182106	0.15732	0.123021	0.178629	0.00626248	0.066319	0.0444768	0.136268	0.119815	0.299042	0.102486	0.295785	0.193456	0.387216	0.295245	0.111699
ACAGAAAA	-0.119997	-0.111862	-0.101863	0.153974	-0.133724	0.0608719	-0.247237	0.107647	-0.196658	0.074165	0.389258	0.405072	0.465624	0.449887	0.0107188	0.191774	0.0645698	0.013434	-0.0629074	0.144928	-0.208991	0.0638168	-0.0617943	0.121728	-0.10846	0.058854	0.0939477	-0.0743326	-0.0634388	0.110812	-0.240012	0.097937	-0.164016	0.189963	-0.0262353	0.136567	-0.138405	0.0256839	-0.184466	0.109153	-0.146725	0.225379	-0.0566158	-0.025373	-0.154363	0.268922	-0.00605576	0.0312568	-0.145967
GGCAGAAA	-0.0807006	0.294706	0.0191211	0.354483	-0.197062	0.133286	-0.0247258	0.255434	0.127665	0.148881	0.213474	0.450155	0.469452	0.450907	0.0637924	0.316745	-0.0679469	0.168206	0.0249699	0.241723	-0.0697171	0.147753	-0.105453	0.290754	0.225922	0.0270989	0.311666	0.176539	-0.0469987	0.0653364	0.00944334	0.127815	0.245147	0.284632	-0.0279908	0.231353	-0.176447	0.0234292	0.14781	0.197944	0.11829	0.289505	-0.0388184	0.17915	0.0440179	0.262495	0.0408094	0.185375	0.141919
CAGAAACA	0.0925981	0.336709	0.173403	0.270907	0.00121473	0.0846259	0.148036	0.238737	0.156659	0.0714286	0.353997	0.445383	0.462582	0.460844	0.256766	0.308238	0.217277	0.17253	0.203689	0.279011	0.168316	0.236547	0.0694827	0.243908	0.160499	-0.0234967	0.202032	0.124023	-0.02169	0.0972908	0.0972874	0.0859898	0.182371	0.188961	0.116073	0.125612	0.0317545	0.0371468	0.144876	0.0628499	0.100104	0.0931003	0.140075	0.169625	0.0613065	0.166274	0.169736	0.0270287	0.0308449
ACAGAAAC	0.148955	0.184901	0.0945469	0.305026	-0.0217996	0.197048	0.103266	0.239834	0.0588885	0.120298	0.392759	0.414702	0.447843	0.465438	0.197509	0.234725	0.090771	0.252934	0.194287	0.188389	0.243588	0.113961	0.0645526	0.292854	0.200741	0.0491091	0.250383	0.178785	0.182112	0.257103	-0.0417408	0.127016	0.143844	0.285223	0.0342642	0.232121	0.25414	0.247885	-0.16073	0.221646	0.170215	0.213511	0.0838383	0.268785	0.157489	0.290908	0.0945534	0.232061	0.0359745
ACAGAAAG	0.135313	0.163381	0.00378753	0.20532	-0.0582065	-0.0551145	-0.000881026	0.236193	0.0783194	0.144467	0.120053	0.39879	0.447157	0.465156	-0.0351253	0.26915	0.142779	0.135512	0.00646654	0.204546	0.175918	0.218292	-0.0466817	0.225972	0.160862	-0.0292432	0.233018	0.0436042	0.0422365	0.166339	0.174109	0.193008	0.170196	0.334945	0.163556	0.238826	-0.0554232	0.124869	0.10114	0.0531794	-0.0168088	0.218493	-0.0708216	0.226451	0.0354473	0.200923	0.110842	0.235015	0.219047
ACAGAACT	0.110061	-0.081033	0.298353	0.110603	-0.0152573	-0.151428	0.0457764	-0.0033351	0.0924177	-0.0978302	0.295467	0.388141	0.461137	0.46592	0.265944	0.0494501	0.164502	-0.114327	0.18246	0.0541371	0.152092	-0.0375561	0.194573	0.00356262	0.182953	-0.104964	-0.0343595	0.139113	0.127566	0.0777432	0.105673	0.0137507	0.142907	0.175321	0.149682	0.21749	0.165809	0.151969	0.134726	-0.0448498	0.145377	0.0118969	0.313949	0.126374	0.224812	0.217688	0.19795	0.0880857	0.125751
CAGAAAGA	-0.0352184	-0.0941756	0.061703	-0.0473727	0.083539	-0.149894	0.0470406	-0.00550236	0.234943	0.0353973	0.289403	0.371348	0.457397	0.458508	0.0696649	0.0648788	0.0327239	0.209503	-0.103339	-0.0402592	0.192655	0.0374312	0.183201	-0.0129066	0.228088	0.212408	0.0864803	0.133862	0.252464	0.144301	0.287278	0.270781	0.165883	0.145513	-0.0725496	0.0249691	0.0329153	0.0173812	0.205802	0.111579	0.0419779	-0.127572	0.0620621	0.0232926	0.105083	0.0790609	0.177873	0.144474	0.311607
TCTGTTCA	-0.195078	-0.0860927	-0.0359273	0.101201	0.0142598	-0.0626784	-0.042729	0.00940195	0.00656996	0.138588	-0.0379413	0.00954647	0.453661	0.461418	0.0954262	0.0884597	0.0123026	0.0373334	-0.0535153	-0.0482963	-0.277728	0.0697573	-0.104769	0.0858581	-0.134872	0.0642358	0.0528524	-0.11209	-0.0153075	0.0741784	0.25481	0.153026	0.0307794	0.175196	0.067038	0.12916	-0.100218	-0.159688	-0.0255725	0.220482	-0.0972614	0.0711541	-0.0231941	0.0264729	0.280314	0.174565	0.266774	0.214629	0.363065
ATCAGAGA	-0.0626779	0.00725348	-0.203152	-0.035009	-0.192082	0.0215235	-0.106449	-0.0342958	-0.17167	-0.152871	-0.0122632	-0.0461193	0.463145	0.461879	0.0143333	0.126182	-0.101547	0.00543372	-0.22993	0.013716	-0.145593	-0.0728602	-0.138195	-0.0674899	-0.0697966	0.0525396	-0.0329349	-0.1266	0.102669	0.096141	0.349603	0.392915	0.237363	0.186942	0.276399	0.190929	-0.189963	-0.0555089	-0.0419577	0.0860145	-0.011472	0.205647	0.255478	0.145711	0.246467	0.377212	0.287248	0.29507	0.431558
GATCAGAC	0.0459282	0.142327	-0.131785	0.0915389	-0.218977	-0.191009	0.094079	0.0427774	-0.150031	-0.0745653	0.199974	0.260336	0.453035	0.454443	-0.16073	0.171525	0.124653	0.18806	-0.0923913	0.182324	0.0233316	-0.0487731	-0.0482139	-0.0666889	0.0450859	0.0772972	0.00277759	-0.164589	-0.0530988	-0.00397919	0.333796	0.421468	-0.013545	0.0541092	-0.0204017	0.0871166	0.013707	-0.159176	-0.110513	0.198726	-0.105849	-0.148545	0.0421764	-0.0147938	0.157605	0.230453	0.165705	0.336796	0.388344
TCTGGTCA	-0.311182	0.131255	-0.088974	-0.030179	0.014034	-0.0816853	-0.120273	0.119148	0.00767354	-0.054172	0.0575542	0.235762	0.436784	0.451128	-0.161798	0.0445295	-0.216431	0.0648282	-0.221538	0.015037	-0.121254	-0.198716	-0.134486	0.0981873	-0.129414	-0.0170651	0.0233336	0.00879616	0.113976	0.129421	0.294993	0.379964	0.386502	0.312697	0.240698	0.308032	-0.239362	-0.203763	-0.181816	0.0788408	0.103763	0.280535	-0.0977114	0.21487	0.211808	0.20237	0.311673	0.329706	0.308649
ATCAGATC	-0.0089903	0.00161329	-0.157187	0.140107	-0.0772566	-0.141005	-0.0541696	-0.0600283	-0.107831	-0.0700155	0.215355	0.253903	0.447911	0.450704	-0.0151413	0.199398	0.0770341	0.168785	-0.0471793	0.17891	-0.25544	-0.0645459	-0.247886	0.0839497	-0.167985	0.00672227	0.03234	-0.064307	-0.0654238	-0.0196299	-0.0625664	0.0476565	0.0498151	0.149364	0.0931476	0.136555	-0.121681	0.0105052	0.0134296	0.109502	0.0321528	0.0538341	-0.0371635	0.0881552	0.0427983	0.10686	0.00498895	0.0604923	-0.107935
GCCAGAAC	-0.130539	-0.0103858	0.0919812	0.0554499	0.00342401	-0.0768683	0.0189098	0.0100963	0.0929315	0.112706	0.146659	0.0950885	0.449662	0.450433	0.106314	0.148777	0.0940031	-0.135952	-0.0559048	0.0892953	0.082523	-0.00445672	0.153897	0.0366103	0.100931	-0.0277284	0.0422786	0.105433	0.193105	0.0495785	0.243117	0.232354	0.116981	0.139295	0.302165	0.235028	0.0837405	-0.023051	0.130972	-0.147366	0.0563455	0.113589	0.1828	0.0161796	0.174203	0.212749	0.205713	0.221768	0.227723
ACTCTGAT	0.0740423	-0.0887117	-0.0563879	0.0555911	-0.006472	-0.0722279	-0.0258273	-0.080391	-0.000884971	0.00103271	0.173031	0.233076	0.448274	0.451372	-0.00278134	-0.035478	-0.146597	-0.0103618	-0.0240429	-0.0276409	-0.0417447	-0.0154766	-0.158336	-0.00127119	-0.00284166	0.0979399	0.0455639	0.000476104	0.029559	-0.161083	-0.223508	-0.11152	-0.1266	0.00277324	-0.185699	-0.0334593	0.0798787	-0.162342	-0.0736416	-0.191364	0.123032	-0.116749	0.00924525	0.0272747	-0.0676016	0.0369648	-0.173993	0.0567142	-0.227572
AGCCAGAA	-0.101682	0.00702426	-0.146344	0.0474996	-0.116241	0.184215	-0.354516	-0.0730922	-0.186328	-0.0639819	0.210109	0.319832	0.445841	0.45331	-0.127165	0.172497	-0.131158	-0.155284	0.00299484	0.132669	-0.181816	0.0538652	-0.217393	0.0430055	-0.209151	-0.26968	0.0321895	-0.243415	-0.186967	0.0134398	-0.123062	-0.0764514	-0.264975	0.0180282	0.0942702	0.0418302	-0.170553	-0.00845669	-0.267572	-0.0216132	-0.172584	-0.0916487	-0.121896	0.0667002	-0.214874	0.098832	-0.0810844	0.158072	-0.172354
GGGACAGA	-0.0947483	0.0747142	-0.0307136	0.0482719	-0.195468	-0.00894482	-0.21296	0.0141458	-0.15157	0.0177793	0.148844	0.314705	0.450661	0.45854	-0.114813	0.0148359	0.0560464	0.181237	-0.148945	0.0347592	-0.00306503	-0.075532	-0.139041	-0.0930317	0.0493524	0.14411	0.00975984	-0.0230855	-0.103621	-0.0265091	-0.219654	-0.126841	-0.0246707	-0.034546	-0.0450957	-0.0199832	-0.146218	-0.0632967	0.0950551	0.0399067	-0.147496	0.14619	-0.174232	0.0288713	-0.101954	-0.0170921	-0.15817	-0.0928052	0.0657641
CTGACAGA	-0.111351	-0.0884533	0.0662228	-0.0702986	-0.089059	-0.170553	-0.100218	0.0196752	0.0808141	0.18858	0.0998636	0.3035	0.448558	0.459572	0.286849	0.251515	0.208591	0.0931748	0.174349	0.137216	-0.0303836	0.0478419	0.053625	0.0609722	0.0810845	0.144595	0.0447082	0.161192	0.0303666	-0.0514158	0.152615	0.0804222	0.259121	0.153945	0.113375	0.134042	0.0515363	0.0856639	0.143768	0.0411765	0.0948005	0.184454	-0.0641776	0.10456	0.040148	0.0974126	0.136485	0.00143101	0.227229
ATTTCTGA	0.0649048	-0.0455631	-0.221467	-0.108884	0.0261773	-0.0226915	0.0218862	-0.0209225	-0.116241	0.079719	0.154566	0.208741	0.439096	0.459557	-0.107469	0.0644851	0.0236967	0.0124672	-0.122768	-0.0299725	-0.106601	-0.209151	-0.0958734	-0.150031	-0.0764671	0.0208664	-0.0841475	-0.115614	-0.00090838	-0.19431	0.0553193	0.0785045	0.0345685	-0.0748666	0.148932	0.29826	-0.0218498	-0.154975	-0.111407	0.000841066	0.0485475	0.227346	-0.0334007	-0.0149296	-0.0647137	-0.0189697	-0.0780709	-0.00513709	0.028206
GCGTCAGA	-0.0829976	-0.0860637	-0.127084	-0.0984506	-0.163639	-0.0502939	-0.0333791	-0.0876995	-0.104239	-0.0794671	0.147725	0.228936	0.439366	0.461675	-0.0500252	0.00951578	-0.00455963	0.00762187	-0.061665	-0.0183802	-0.0771682	0.196367	-0.0151494	-0.0619628	0.0457703	0.123827	0.108139	-0.0671235	-0.00728967	0.151332	0.243212	0.372046	0.169984	0.198215	0.119238	0.186543	-0.0681964	0.0954726	-0.0702073	0.00735948	-0.0905225	0.108972	-0.00742064	-0.0433388	-0.0923618	0.0150323	-0.113371	0.0402657	0.196793
ACCAGAAC	0.0399788	0.16564	0.258202	0.177957	0.0931242	-0.152724	0.0568529	0.102628	0.144262	0.158889	0.316609	0.364964	0.445911	0.460438	0.282191	0.223384	0.0740905	0.0821945	0.0847396	0.266045	0.0962603	-0.102641	0.25549	0.220665	0.15959	-0.0167608	0.189952	0.122556	0.104142	0.136946	0.394338	0.350611	0.276792	0.265673	0.311416	0.241902	-0.00602217	-0.018106	0.000508738	0.101498	0.168195	0.242766	0.239743	0.191036	0.178031	0.30079	0.226213	0.198855	0.293719
ACCAGAAA	-0.0463603	-0.189963	-0.0951395	-0.0483081	-0.215927	-0.0139458	-0.0199137	-0.06525	-0.0867244	-0.0976488	0.133918	0.294993	0.437286	0.455266	-0.15867	-0.0159321	-0.0764995	-0.188606	-0.0117771	-0.0571512	-0.149214	-0.164782	-0.145593	-0.0941358	-0.17167	-0.0364846	-0.110846	-0.0307256	-0.0330248	-0.0860886	-0.134969	-0.0853395	-0.0703491	-0.00707666	-0.0791338	0.181213	-0.116431	-0.187943	-0.0601716	-0.14023	0.289899	0.400388	-0.131605	-0.232239	-0.172354	-0.0520144	-0.0451324	0.0229571	-0.0725145
CAGAAGCG	0.0891827	-0.16216	-0.0317381	-0.231426	-0.192445	-0.16216	-0.0834189	-0.281531	-0.286646	-0.110679	0.317178	0.318495	0.437931	0.455007	-0.0507771	-0.0176316	0.181651	-0.146344	0.0984176	-0.0416255	-0.04875	-0.264975	-0.0254767	-0.138195	-0.0334786	-0.106803	-0.0596723	-0.216178	-0.134008	-0.141567	-0.135458	-0.0490882	-0.0542892	-0.28041	0.0120589	-0.266756	0.357083	0.415437	-0.251286	-0.0588202	-0.179588	-0.166555	0.0426509	-0.0292064	0.00867206	-0.0516568	-0.0115304	-0.166555	-0.198297
AGGGCAGA	-0.00540762	0.132755	0.102073	0.11645	-0.0233498	0.0164935	-0.0158835	0.18563	0.16226	0.135968	0.261591	0.364718	0.438848	0.450187	0.190499	0.128404	0.0582387	0.225937	0.0147793	0.173872	0.15166	0.152103	0.0270106	0.154706	0.170654	0.226439	0.16412	0.180587	0.154451	0.216987	0.281956	0.0978295	0.208601	0.135455	0.276697	0.188721	0.302977	0.342477	0.0454077	0.188725	0.0952978	0.0834498	0.246636	0.136195	0.241278	0.217904	0.13658	0.121022	0.244146
ACTTTCTG	-0.0692166	0.20976	-0.0689574	0.187584	-0.124185	-0.155129	-0.0122533	0.189582	0.028694	0.0527791	0.245208	0.373088	0.434667	0.457811	-0.0805958	0.319297	-0.0392525	0.312055	-0.173049	0.327432	-0.0253974	0.115959	-0.0881494	0.152219	0.0811859	0.141291	0.242513	0.0324057	0.116981	0.318663	-0.0041984	0.276773	0.361793	0.414073	0.034285	0.190215	0.0257213	0.0898334	-0.0765384	0.215787	-0.0237776	0.14112	-0.192445	0.21089	0.0275854	0.260916	0.0422985	0.110402	0.0643853
ATGTTCTG	-0.0358891	0.026396	0.0219103	0.151116	-0.0757163	-0.0372465	0.0272766	0.0493068	0.130548	0.0999446	0.085194	0.324434	0.429855	0.450231	0.073608	0.218841	0.0492286	0.119876	-0.0279494	0.121054	0.0872319	0.0373032	-0.0290332	0.178449	0.144281	0.122684	0.153063	0.14462	0.0903672	0.0381439	0.161095	0.201064	0.221617	0.315205	0.169435	0.132533	0.142709	0.194587	0.131963	0.0385052	0.0611231	-0.0332371	0.0298149	0.193758	-0.00961431	0.152735	0.0725119	0.0767264	0.087637
AAGTTCTG	-0.117914	-0.17122	-0.114086	-0.176195	-0.0378596	-0.208197	-0.0749563	-0.21986	-0.0515669	-0.157187	0.228274	0.316666	0.407227	0.457578	-0.0936141	-0.117393	-0.0719217	-0.132883	-0.0167867	-0.115802	-0.229328	-0.161618	-0.141341	-0.130452	-0.00240322	-0.0145882	-0.09828	-0.12161	-0.0848848	-0.0648088	-0.180967	0.0821336	-0.0798947	-0.131966	-0.0527387	0.00649254	-0.110958	-0.179588	-0.202503	-0.213608	-0.0646151	0.221032	-0.0496433	-0.117653	-0.226761	-0.119179	-0.00319604	0.00453707	-0.248413
GCAGAACC	-0.232883	-0.16216	-0.119654	-0.104001	-0.190309	-0.203858	-0.0797141	-0.0214456	0.0254876	-0.148017	0.0960314	0.132579	0.388056	0.464848	0.000810513	0.0949833	-0.0601208	-0.0156204	-0.0981266	0.106215	-0.0704596	-0.161798	-0.0646045	0.0288838	-0.131247	0.0933456	0.0485868	0.00423672	0.0567899	-0.073493	-0.0750767	0.103307	0.038271	0.108364	-0.0210488	0.124741	0.0513484	-0.201278	-0.0984368	0.0228471	0.0880234	0.0433481	-0.00970099	-0.088942	-0.107212	-0.0317701	0.0788285	0.0430131	-0.191009
AGGTTCTG	0.127646	0.259957	-0.13851	0.0881903	-0.0572326	-0.100612	-0.0107709	0.149793	0.0545288	-0.0928954	0.178732	0.3235	0.421734	0.452194	-0.083432	0.185747	0.0790976	0.0954629	-0.022881	0.123561	0.169868	0.0819186	-0.140121	0.00506658	0.0683665	0.0432235	0.184044	0.183914	0.294874	0.34719	-0.0591741	-0.0616474	0.299701	0.207955	0.0902899	0.00717535	0.0167969	-0.0315532	-0.044346	0.152847	0.00438976	-0.0029968	0.0703285	0.0588105	0.0285508	0.0360162	-0.0747795	0.00720877	-0.0516002
ACAGAACG	0.0417817	0.0388922	-0.347756	-0.025473	-0.289963	0.0504374	-0.137161	-0.191364	-0.279588	-0.036469	-0.0749661	0.1867	0.399769	0.450139	-0.270997	0.0977738	-0.118977	-0.00934161	-0.114146	-0.0972606	-0.305404	0.0202454	-0.25867	-0.0574707	-0.0522536	0.148829	-0.122257	-0.354061	-0.375696	0.103422	-0.302319	0.124909	-0.210347	0.038143	0.00411743	0.0944862	-0.325964	0.018395	-0.233442	-0.0418958	-0.114997	0.0496087	-0.078323	0.0947126	-0.137161	0.00652256	-0.188273	0.174824	-0.195468
CAGAACCG	-0.0593162	0.0955977	0.0324205	0.0823402	-0.109691	-0.272816	-0.0264602	0.150486	-0.0948793	-0.0507557	-0.060741	0.305984	0.347668	0.451289	-0.0762683	0.116637	0.170007	-0.0273739	-0.00402838	0.109686	-0.104479	0.079015	-0.023752	0.0125703	0.0764881	-0.0120886	0.158094	0.0773056	-0.0834346	0.173639	0.168407	0.135757	0.188944	0.219698	0.249652	0.228276	-0.151856	0.0982575	-1.24226e-05	0.0103048	0.00303864	0.216177	-0.0208558	0.0840875	0.0457296	0.0909931	0.0893185	0.0577536	0.309946
CAGAACTG	-0.201818	-0.0909855	0.0433712	-0.073692	0.0252029	-0.15544	-0.181248	-0.0648082	0.0811073	-0.0263899	0.178061	-0.0368947	0.128757	0.193611	0.0394403	-0.128904	-0.000983081	-0.0967438	0.0479819	-0.0104596	-0.00852783	-0.128904	0.0510469	-0.11209	-0.137469	-0.0284558	-0.0384879	0.00786735	0.264693	0.159422	0.404604	0.406025	0.334485	0.246723	0.227609	0.167558	0.0545159	-0.121183	0.173729	0.0133497	0.0771943	-0.0838506	0.482136	0.378518	0.441614	0.420692	0.459155	0.343835	0.408181
AGAGACCA	0.0845784	0.00317788	-0.170553	-0.230103	-0.23439	-0.154668	-0.146725	-0.0353411	-0.0382136	0.0421236	-0.109259	0.00525258	-0.0921822	-0.104287	-0.0588943	-0.147108	0.00571855	-0.0606009	-0.0509686	-0.206298	-0.121968	-0.21152	-0.0775143	-0.0130821	-0.00685503	0.08529	-0.130277	-0.104769	-0.0226251	0.0627127	0.441782	0.449842	0.306124	0.248924	0.266872	0.177597	-0.20381	-0.139686	-0.240782	-0.0458544	0.0106998	0.118776	0.467439	0.347236	0.316527	0.398067	0.058433	0.174294	0.426559
TGAGACCA	-0.156384	-0.399568	-0.088415	-0.16517	0.21793	0.174377	-0.137882	-0.242713	-0.155284	0.00325281	-0.102919	-0.316115	-0.0387371	-0.105355	-0.0631074	-0.335556	-0.156225	-0.160033	-0.0485865	-0.205948	-0.261083	-0.302136	-0.0221725	-0.218575	-0.191721	-0.314935	-0.293181	-0.137366	-0.111805	-0.246597	0.43952	0.463169	0.0966716	-0.0508259	0.205577	0.0278079	-0.188941	-0.248017	-0.15817	-0.334969	0.117912	0.0623494	0.459215	0.182375	0.315864	0.218785	0.166042	0.0627025	0.441324
GGGACCAA	-0.0555957	-0.247886	-0.0474441	-0.0847433	0.212742	0.243321	-0.123582	-0.115614	0.0354583	-0.0181555	0.048986	0.0151671	0.0745801	0.197208	0.00897571	-0.116813	0.0183658	0.0425211	-0.0477238	0.00284309	-0.182391	-0.181531	-0.0982399	-0.0673339	0.0126102	0.0659186	-0.129158	-0.0835293	0.0936147	0.0838711	0.420229	0.442943	0.201145	0.187252	0.139279	0.0280142	-0.0188996	-0.0762713	-0.0222864	-0.151999	-0.0837098	0.0206282	0.455832	0.308723	0.353008	0.363118	0.269582	0.209812	0.375518
CTGGTCTC	-0.133255	-0.0990158	0.128761	-0.1284	0.0332221	-0.0504228	0.00770334	-0.105355	0.00198807	-0.0685334	0.00680693	-0.0831217	0.0287645	0.00128849	0.0759253	-0.0836347	0.00719276	0.0634241	-0.0141946	-0.179048	-0.0439503	-0.0476512	0.0556617	-0.208355	0.0176455	-0.2011	-0.15391	-0.0551192	0.236599	0.10428	0.461536	0.4457	0.261003	0.0736972	0.261828	-0.0129647	0.10395	-0.208991	0.0513542	-0.164589	0.133431	-0.0622009	0.446628	0.193775	0.410924	0.351542	0.297466	0.00720439	0.322499
ACTGGTCT	0.0912279	-0.060329	-0.0434685	-0.0863184	-0.00901659	-0.0992389	0.0792267	-0.00909872	0.162292	-0.0992888	-0.0842157	-0.139577	-0.0154121	0.0583177	0.0615147	0.0266938	-0.210624	0.098936	-0.165561	-0.0130732	-0.0756513	-0.171444	-0.138828	-0.0747273	-0.0576464	-0.160206	-0.124872	0.0993153	-0.0208284	-0.104721	0.456652	0.433939	0.0243754	0.0338482	-0.0236557	-0.0960697	-0.0519091	-0.143063	-0.0942402	-0.00129526	0.108972	-0.0473043	0.399818	0.150549	0.319137	0.180517	0.0848324	0.1409	0.409479
GGACCAAC	0.150769	0.1441	0.0108993	0.180873	-0.167162	-0.0234638	-0.142251	0.00347684	-0.0859894	0.0277599	-0.0101107	0.0625919	0.241143	0.287231	0.0342657	0.089932	0.125474	0.0854903	0.102825	0.105854	-0.144249	-0.0833306	0.0799284	-0.0334654	0.116451	0.0919477	-0.0251899	-0.0145918	-0.0319093	0.000257985	0.435983	0.455175	0.302436	0.170311	0.273754	0.221874	-0.0862386	-0.144009	-0.0364864	0.0162517	0.0432761	0.325726	0.396544	0.226602	0.375859	0.312012	0.167694	0.0937411	0.426384
GACCAAAC	-0.0216076	-0.00228235	-0.00396677	0.064995	-0.0308366	0.096031	-0.0954255	0.100302	-0.0302768	0.0845539	0.166879	0.10508	0.189105	0.134257	-0.0144635	0.134029	0.160501	0.124761	-0.0234603	0.145484	0.104685	-0.099506	0.0808039	0.113979	0.155038	0.0477558	-0.0360529	-0.0555445	-0.0665619	0.0784057	0.448516	0.463503	0.38034	0.319566	0.276442	0.331284	-0.131605	-0.137366	0.117008	0.114139	0.159803	0.34916	0.322951	0.323768	0.320145	0.400687	0.29047	0.285693	0.436959
ATTTGGTC	-0.100043	0.142719	0.175747	0.177553	0.0279908	0.112747	0.000737561	0.109132	0.193964	0.0351306	0.035235	0.100773	0.147402	0.101242	0.133905	0.146141	0.158697	-0.0779704	-0.0630706	0.0427077	0.181814	0.256068	0.248991	0.274175	0.226301	0.0645257	0.122181	0.147314	0.323077	0.361784	0.44077	0.439683	0.293843	0.384489	0.327864	0.35135	0.327354	0.400251	0.287341	0.244227	0.0898874	0.225536	0.286697	0.33713	0.36099	0.417075	0.188602	0.250301	0.373096
AGTTCAAT	-0.0122285	-0.00248574	0.0300686	0.171028	0.0731075	0.247406	-0.0523899	0.125081	0.108895	0.149453	0.0198654	0.0984862	-0.214569	0.142876	-0.0686846	0.158099	0.0311151	0.0632647	-0.074119	0.0261285	0.15771	0.183033	0.181359	0.320551	0.126908	0.0478303	0.126816	0.159868	0.253751	0.362531	0.37102	0.330076	0.208179	0.303031	0.0134473	0.18808	0.392554	0.427578	0.231506	0.309931	0.0622068	0.022787	0.236739	0.230995	0.351488	0.39196	0.215008	0.221453	0.399453
AGTTCAAG	-0.134872	-0.0518261	-0.104769	-0.0697855	-0.0208276	-0.0777814	0.102905	-0.0315094	-0.121538	-0.0654189	0.037521	0.0371028	0.196946	0.13761	-0.119044	0.0551627	0.0380918	-0.0135459	-0.0592806	-0.0273634	-0.0180842	-0.134872	-0.170774	-0.0585592	-0.00216606	-0.0143231	-0.0352198	-0.0819665	0.0493524	0.149691	0.251258	0.236493	-0.0586137	0.178462	0.064468	0.0125245	-0.186328	-0.0548356	0.0643191	0.03556	-0.084477	0.0717694	0.300573	0.171733	0.305796	0.424634	0.304354	0.3067	0.338511
AGATCAGC	0.0293869	0.0921084	0.218225	0.181789	0.0963826	0.0563611	-0.0815411	0.0435097	0.186296	0.0552818	0.0816559	0.209076	0.288142	0.260979	0.210963	0.280522	-0.0412261	0.194394	0.084504	0.118076	0.0991796	0.158106	0.168743	0.139355	0.116589	0.15267	0.0773858	0.240741	0.0408918	0.088966	0.21799	0.24779	0.163172	0.227785	0.101705	0.245782	0.191119	0.0994625	0.227145	0.210874	0.283327	0.424952	0.185986	0.255123	0.203163	0.204251	0.259687	0.267472	0.283792
AAAATCAA	-0.209909	0.0273058	-0.0894752	-0.0479758	0.103229	-0.0227749	-0.00700771	0.0664367	0.12166	-0.0222782	-0.00681192	0.057633	-0.0832278	-0.106248	-0.0444488	0.0442532	-0.116494	0.280198	-0.00127123	0.0130642	0.215139	0.170251	0.162944	0.207299	0.0725491	0.163933	0.191822	0.119018	0.34449	0.327812	0.430939	0.436513	0.211304	0.164589	0.0673883	0.175676	0.38237	0.38621	0.275282	0.269978	0.0500376	-0.017473	0.335419	0.289093	0.370013	0.290828	0.125852	0.0325433	0.395267
AGTTCAAC	0.374013	0.439561	0.188789	0.312802	-0.00403572	0.0733849	0.39698	0.427817	-0.0126656	-0.107263	0.189293	0.288417	0.103324	0.221754	0.185804	0.298637	0.314026	0.249364	0.226521	0.409726	-0.00238092	-0.066301	0.0326745	0.11634	0.155984	-0.0516495	0.0340055	0.0464721	-0.0266534	0.0886275	0.443202	0.455565	0.028865	0.163728	0.254181	0.196616	-0.0217532	0.01294	0.0538845	0.292666	0.0116254	0.105387	0.249116	0.224943	0.264348	0.348047	0.433799	0.318009	0.445323
GTGACCAA	0.120988	-0.0935433	0.100915	-0.201637	0.156408	-0.0324536	0.0291665	-0.269897	0.144995	-0.10348	0.00134814	-0.060303	0.0713481	0.0961423	0.00130434	-0.229585	0.0638402	-0.0307361	-0.0631724	-0.148149	0.0532069	-0.321112	-0.0241992	-0.212552	0.116944	-0.0470349	-0.215864	0.0531426	0.138209	-0.0384283	0.439803	0.415574	0.3198	0.122837	0.26585	0.0836873	-0.111407	-0.162342	0.130385	-0.0602648	0.177146	0.0671502	0.275063	-0.0728254	0.347597	0.177541	0.365152	0.353369	0.463805
GATCAACA	0.257739	0.0362577	0.228116	0.0579499	0.0530307	-0.0548806	0.186267	0.0205315	0.158758	0.0279411	0.206073	0.0444933	0.266311	0.154374	0.155506	0.0827968	0.199128	0.0491778	0.104813	0.0764548	0.0238613	-0.144612	0.194528	0.152156	0.174275	0.0173783	0.0424927	0.152865	0.134799	0.100355	0.449857	0.451182	0.174325	0.173703	0.217837	0.218117	0.0729332	0.258269	-0.0390312	0.120243	0.245001	-0.0397657	0.364541	0.303802	0.374636	0.369852	0.269968	0.324085	0.442766
GACCAACA	0.148421	0.0430332	0.137608	-0.058597	0.037216	0.0106018	0.124055	-0.020605	0.145287	0.0482428	0.186433	-0.0580682	0.136996	0.0606468	0.17687	0.0735069	-0.00392016	-0.0319381	0.0778968	0.0986097	-0.0399227	-0.195861	0.0478289	-0.0169977	-0.0977464	0.0673514	-0.0781016	0.159788	-0.00653895	-0.0924679	0.437715	0.462149	0.208386	-0.0242253	0.116686	0.0667107	0.0123932	-0.345223	0.0648618	0.0896794	0.198278	-0.0201342	0.394723	0.256005	0.357875	0.29753	0.272831	0.347617	0.453245
GACCAACC	0.172698	-0.157187	0.209271	0.0167045	0.2152	0.0653198	0.175195	-0.0473639	0.0373678	-0.0349552	0.256364	-0.132057	0.126776	0.0665327	0.0615264	0.0293407	0.115883	-0.162525	0.111563	-0.0830493	-0.0357226	-0.258503	0.165829	-0.034584	-0.0460289	0.0180986	-0.161261	0.130773	0.105124	0.0225499	0.448284	0.465161	0.309114	0.145463	0.401634	0.316164	0.093168	-0.205552	0.130017	0.046096	0.162437	0.0899553	0.352704	0.259106	0.409792	0.401779	0.317705	0.272573	0.434539
GACCAATA	0.060849	0.144899	-0.119044	-0.123732	0.0314205	-0.0969882	0.069043	0.0681382	0.0876981	0.103169	0.0130326	0.0696516	0.0399745	0.167762	0.101365	-0.0140646	-0.0351661	0.00108662	0.0075126	0.0304933	-0.0466958	-0.117328	-0.0784952	-0.0118177	-0.235556	0.187477	-0.0244489	0.195347	0.23374	0.186681	0.442299	0.467938	0.246467	0.27188	0.214403	0.311837	-0.0228692	-0.0751443	0.118249	0.149723	0.0275841	0.13539	0.362089	0.296826	0.271296	0.322362	0.373803	0.367113	0.415435
AAGTGGTC	0.073862	0.23599	-0.148149	-0.0419552	-0.172584	-0.0921021	-0.0751397	0.10197	-0.0438893	-0.0619456	0.170798	0.0587741	0.389151	0.399586	-0.0722356	0.17447	-0.0505004	0.0446588	-0.0610657	0.0937762	-0.1065	-0.204964	-0.152578	0.0089216	-0.0285508	0.152271	-0.0443813	-0.0485659	0.116158	0.218716	0.42927	0.457677	0.247104	0.208125	0.271902	0.268861	-0.0702226	0.0714991	-0.152871	0.147033	0.0320569	0.112866	0.138634	-0.0106737	0.278161	0.380557	0.111418	0.107973	0.434333
TCAGACCA	0.0925168	0.126951	0.0539355	0.106549	-0.0509504	0.0117648	-0.0642935	0.0289359	0.193739	-0.0220538	0.0728246	0.0580117	0.428129	0.397564	0.109623	0.107485	0.15514	0.133557	0.167482	0.0654707	0.0796072	0.059683	0.181053	0.0815454	0.156282	0.0351791	0.076359	0.170542	0.0430775	0.102285	0.417204	0.457038	0.158918	0.261822	0.262524	0.27224	0.00523249	0.0282882	0.173569	0.216138	0.226559	0.168091	0.106706	0.0245477	0.22315	0.33313	0.151504	0.262112	0.432643
TGGTCAAA	0.0570127	-0.173518	0.0232732	-0.0354874	-0.114509	-0.00610662	0.142294	-0.129414	0.11944	-0.079071	0.0760166	0.18982	0.390151	0.425417	0.00526778	0.0999201	0.0820632	-0.0371275	-0.208884	0.0467305	-0.0540696	-0.198297	0.049769	0.0184007	0.00754835	0.0584429	-0.152578	0.16762	0.00338281	-0.0665066	0.448527	0.465856	0.159082	0.0738178	0.164939	0.00669056	-0.0284644	-0.223062	0.203204	0.132935	0.0413677	0.154793	0.023298	0.0975545	0.232298	0.281182	0.282418	0.295569	0.440419
CTGACCAA	0.240949	0.231594	0.111038	0.218995	-0.00888557	0.0586703	0.162082	0.191404	0.0345728	-0.00794984	0.132787	0.285434	0.350229	0.353194	0.160963	0.239661	0.198582	0.231062	0.00989706	0.172184	-0.0354737	-0.00921535	0.0653842	0.139054	0.134129	0.182954	0.0732581	0.0426284	-0.0829158	0.0461563	0.457533	0.471753	0.168613	0.192021	0.228887	0.209316	-0.119382	0.0266554	0.0521058	0.235345	0.104645	0.224887	0.139191	0.23169	0.296162	0.332183	0.334516	0.361762	0.447281
TGACCAAA	0.0649596	0.226182	0.120578	0.158489	-0.134582	-0.00619323	0.101275	0.233233	0.118506	0.239087	0.143733	0.190535	0.117039	0.101552	0.0984234	0.117589	0.19849	0.0506069	0.204383	0.173755	0.116286	-0.0882788	0.0708824	0.152109	0.222038	0.231649	0.0854401	0.113603	0.0586491	0.119159	0.462465	0.453034	0.0891886	0.280506	0.221046	0.279856	0.025079	0.0191144	0.204135	0.270386	-0.0418071	0.188905	0.125486	0.313894	0.310863	0.323329	0.360047	0.386833	0.446903
AATGGTCA	-0.0408376	0.204804	0.0807756	0.271355	-0.190309	-0.0587938	0.0307081	0.173333	-0.166959	0.108837	0.085177	0.237195	0.21076	0.204242	0.123763	0.186664	0.228651	0.0714341	0.087847	0.215722	-0.047508	-0.0772821	0.0352394	0.166429	-0.14045	0.0775555	0.102384	-0.0942931	-0.0779913	0.0589009	0.464611	0.459319	0.091206	0.198629	0.122281	0.259199	-0.01729	0.00636951	0.0986394	0.267177	0.0717933	0.20462	0.201033	0.192639	0.315347	0.335079	0.403751	0.431511	0.449043
ATGACCAA	-0.223433	-0.0105821	0.0510011	-0.122475	-0.0207915	-0.195861	0.0203025	-0.0683709	-0.0144763	-0.155752	0.235725	-0.0834955	0.135312	-0.0264306	0.00535974	-0.127084	-0.0363875	-0.0241106	0.015358	-0.0273738	0.13677	-0.100349	0.08145	-0.0991196	0.0551411	-0.0212093	-0.142597	0.0707189	0.10612	0.0231502	0.472716	0.456041	0.163695	0.116902	0.038394	0.00145134	0.115565	-0.117393	-0.00299322	-0.0534497	0.0821376	0.0652638	0.399669	0.167982	0.391261	0.334303	0.37816	0.210573	0.463408
AGTTGGTC	0.258059	0.21198	0.170111	0.0734037	0.0393094	-0.172354	0.370239	0.171785	0.227269	-0.161439	0.308016	0.111586	0.231508	0.216117	0.158962	0.104566	0.305721	0.0479973	0.127617	0.217763	0.14065	-0.1057	0.177755	0.0254342	0.213323	0.06987	0.0705984	0.210024	0.227276	-0.0724935	0.472941	0.445445	0.189081	-0.00898945	0.203338	0.0734778	0.139596	-0.138934	0.150957	0.125659	0.225524	0.0111095	0.234219	0.123721	0.344552	0.221774	0.437178	0.315745	0.474663
GTTGGTCA	-0.00548353	0.0164101	0.0380846	-0.0886806	0.314068	0.15022	-0.0348087	-0.129073	0.018485	-0.177728	0.0438786	-0.0862624	0.235977	-0.0163409	0.013726	-0.137675	0.0934308	-0.129073	0.118903	-0.0285791	-0.0428014	-0.180967	-0.00539331	-0.225414	-0.108938	-0.0682892	-0.24318	0.0428027	0.176083	-0.113966	0.47196	0.474264	0.0896761	-0.0185652	0.283832	-0.0446852	-0.0535558	-0.103716	0.0588739	-0.151286	0.160478	0.000260705	0.265062	-0.069216	0.271336	0.0733304	0.448749	0.305454	0.486275
CTTGATCA	0.0164109	-0.00535355	0.169099	0.0343193	0.114341	0.0530777	0.146011	-0.00995886	0.178084	-0.0559023	0.135103	-0.075771	0.244579	0.190611	0.0703656	0.100354	0.10903	-0.00107798	-0.00319188	-0.0710213	0.0374145	-0.127327	0.17269	0.0879346	0.13268	0.0793805	0.0743931	0.195775	0.0699948	0.0356588	0.47845	0.462448	0.176136	0.118875	0.251538	0.223118	0.0838222	0.111881	0.147021	0.157414	0.158965	0.122318	0.128983	0.125526	0.390213	0.369583	0.365682	0.266719	0.472879
TTGACCAA	0.188669	-0.212436	0.023182	-0.00734641	0.0686956	0.0900193	0.149429	-0.167985	-0.0355381	-0.0365886	0.111928	-0.245593	0.283362	0.225319	0.0720071	-0.0189212	0.0945836	-0.0290486	0.00693835	0.0280854	0.0202638	0.00439883	-0.044046	-0.0437153	0.010852	-0.0731773	-0.122915	-0.00464843	0.0232395	0.00731481	0.473681	0.477746	0.304977	0.317445	0.298484	0.230949	0.0303235	0.0580259	-0.0868057	-0.0394845	0.176882	0.312227	0.302604	0.0721834	0.342292	0.26858	0.215564	0.235015	0.430621
GACCAAAA	-0.104479	-0.0962032	0.0141395	0.0462075	-0.0355868	0.130148	-0.205355	-0.0549345	0.00142836	-0.00550606	-0.0619532	0.119719	0.229959	0.0382142	0.0176664	0.0675544	0.0955846	-0.067229	0.0389825	-0.036586	-0.213727	-0.173993	-0.0140237	-0.0323229	-0.21463	-0.025876	-0.14045	0.0347358	-0.113608	0.0625732	0.469656	0.471734	0.0843529	0.113552	0.252753	0.205975	-0.18041	-0.0465684	-0.0697453	-0.0524926	0.0597719	0.0617538	0.357112	0.230353	0.31603	0.337993	0.205469	0.29236	0.430181
GACCAATC	0.0534809	0.179128	0.19523	0.203076	-0.0194671	0.0596937	0.0993128	0.200678	0.0743167	0.00878502	0.11606	0.157852	0.196196	0.219845	0.0740548	0.165777	0.199438	-0.0461581	0.0748949	0.134173	0.0345783	-0.118776	0.134326	0.169949	-0.0522182	0.0258119	0.0450917	0.101832	0.0432126	0.164173	0.47455	0.480135	0.130629	0.270831	0.313717	0.283182	0.100898	-0.0213923	0.163768	0.250091	0.115541	0.145594	0.25262	0.246168	0.376651	0.404139	0.402947	0.382954	0.447008
ATTGGTCA	-0.15817	-0.0881352	0.144435	-0.040217	-0.0349086	-0.0521155	-0.18729	0.00131618	0.0237476	0.135367	-0.0872594	-0.113136	0.078063	-0.0214824	0.186695	-0.0613799	0.0406137	0.0102901	0.00284167	-0.145717	-0.0785803	-0.149349	0.108697	-0.0711107	0.0121943	0.106758	-0.0849741	0.024052	0.00992793	-0.00351721	0.477997	0.489557	0.331745	0.281924	0.356029	0.349999	-0.0898432	-0.0667881	0.0287872	0.0276394	0.045172	0.192735	0.372235	0.194081	0.427316	0.399043	0.298552	0.274735	0.442061
AATTGGTC	-0.120204	-0.166354	-0.0669665	-0.224718	-0.0976686	-0.254212	-0.0431065	-0.178516	0.123893	0.00900128	-0.0448389	-0.209583	-0.0440184	0.0514075	0.0269902	-0.0910536	-0.031364	-0.0464459	-0.0934887	0.0291856	0.0854189	-0.0314724	-0.0583636	-0.0825719	-0.0773367	0.0830123	-0.137263	0.0997066	0.0789528	-0.129671	0.484081	0.473004	0.277331	0.124835	0.139371	0.175978	-0.0808994	-0.0543591	0.00842806	-0.128904	0.0323287	0.0474475	0.369339	0.0891869	0.419721	0.427054	0.127492	0.190856	0.439205
TAGACCAA	0.0726973	-0.0561288	-0.0786201	0.0590385	-0.145967	0.0374889	-0.115243	-0.0955448	-0.0711782	-0.00764167	0.0585458	-0.0551813	0.317458	0.318044	-0.0261337	0.0323944	-0.0558143	-0.0648337	0.0561741	0.119146	-0.0664131	-0.132698	-0.0653988	0.0395605	-0.0148502	-0.133161	-0.131876	-0.051941	-0.0534687	0.185694	0.476649	0.482311	0.389228	0.257701	0.253687	0.314682	0.0643823	0.044398	-0.118376	-0.0825757	0.131679	0.244634	0.229187	0.184828	0.354965	0.418057	0.00437465	0.236628	0.434702
CAGACCAA	0.0762239	-0.0274553	0.252055	-0.082794	0.0202207	-0.0741181	0.0518609	-0.159346	0.0809654	0.0450998	0.251179	-0.17122	0.254052	0.14918	0.116541	-0.084999	0.126642	-0.0720379	0.202198	0.0452315	0.173887	-0.0560412	0.160676	0.0215005	0.000993421	-0.0590709	-0.108249	0.137804	0.103847	0.144946	0.469542	0.479379	0.260814	0.107387	0.155079	0.23062	0.0535835	0.0640734	0.0432421	-0.0788191	0.144092	0.0136309	0.455569	0.282048	0.409252	0.461426	0.219768	0.319318	0.442244
AGACCAAC	-0.0836979	-0.070799	0.192796	-0.0173301	0.0914978	0.088061	-0.0749895	-0.148413	-0.0374345	0.0251682	0.0503548	0.0562797	0.140068	0.150239	-0.041361	0.139815	0.170369	0.0810498	0.0336052	-0.00137287	-0.00235487	-0.148812	0.168547	0.00106925	-0.0508434	0.10473	-0.0737945	-0.0401931	0.181582	0.147938	0.429012	0.464569	0.217536	0.213001	0.162139	0.234595	0.12326	0.12982	0.076469	0.0540424	-0.0275964	0.200007	0.487332	0.451608	0.451252	0.462997	0.210551	0.254037	0.402178
AAGACCAA	-0.158004	-0.144129	0.0156486	-0.136856	0.262633	0.21002	-0.0400816	-0.144249	0.218914	0.0250505	0.0955797	-0.118842	0.0559382	-0.150031	0.0744677	-0.212205	0.0184368	-0.00349395	-0.0910964	-0.124872	0.2221	-0.139794	0.00891878	-0.121467	-0.0329544	-0.191721	-0.206399	0.0940176	0.198877	-0.0865501	0.463414	0.454946	0.400788	0.293349	0.343828	0.188731	0.0309212	0.00247823	0.109562	-0.118046	0.221133	0.214096	0.486789	0.383961	0.446994	0.363391	0.249095	0.137713	0.440074
GAGACCAA	-0.196658	-0.216368	0.0695656	-0.170997	0.153683	-0.110846	-0.0882089	-0.112321	0.0655712	0.0540715	-0.00354665	-0.0438431	0.0533032	-0.0462639	0.11147	-0.018053	-0.0118153	0.0256302	-0.0231673	-0.126922	0.0105411	-0.132057	0.06116	-0.111295	-0.0494045	0.104402	-0.172584	0.131191	0.221918	-0.0549161	0.492751	0.479786	0.409678	0.211159	0.401179	0.305064	-0.00338442	-0.130715	0.0349398	-0.0232235	0.186719	0.185311	0.479527	0.344136	0.468564	0.432942	0.34052	0.234173	0.459107
AGACCAAT	-0.0202487	-0.0149839	-0.141454	0.128751	-0.235853	0.0751608	-0.109909	-0.0693416	0.0498052	0.102017	0.00816126	-0.00960781	0.220249	0.213284	-0.191364	0.0878916	-0.0242264	0.0949856	-0.19431	0.0998334	0.0830836	-0.0822192	-0.152433	0.0376737	-0.0369786	-0.113549	-0.0720506	-0.101818	0.0533756	0.129457	0.475398	0.467582	0.454832	0.391257	0.328694	0.288006	0.0617571	0.0713482	0.0283211	-0.0469934	0.149121	0.384449	0.464548	0.392691	0.433717	0.431963	-0.00284449	0.209891	0.403113
AGACCAAA	-0.156225	0.074402	0.073011	0.122723	0.0107044	0.0850384	-0.210073	0.130733	0.107925	0.0800467	0.133435	0.122571	0.126476	0.0772221	0.0012366	0.103948	-0.0311234	0.142503	0.0861426	-0.0428248	0.0850148	0.12951	0.260957	0.325685	-0.0105974	0.0755674	0.155525	0.115263	0.303291	0.365964	0.455159	0.464796	0.32509	0.386768	0.242066	0.283658	0.368676	0.397146	0.29996	0.348563	0.119063	0.186401	0.344548	0.268748	0.351416	0.386536	0.268856	0.26114	0.426326
GAGTTCAA	-0.11343	0.0795418	-0.0414778	-0.0301106	-0.127737	-0.0187657	-0.0806152	0.0748493	0.0478251	-0.0675409	0.0237385	0.0606758	0.34966	0.345629	-0.116813	0.0438525	-0.159517	0.158373	-0.0730405	0.0745485	-0.115739	-0.127654	-0.0479949	0.029682	-0.111464	0.0405285	-0.0818505	0.0174422	0.116184	0.0695321	0.449849	0.460327	0.395259	0.300366	0.250552	0.266295	-0.190309	-0.119246	-0.0387281	0.133455	0.237329	0.389106	0.260515	0.187179	0.349597	0.400423	0.35965	0.401464	0.46304
GATCAAAC	0.0413136	-0.00684531	0.21755	0.134497	0.0703712	0.0149084	0.118539	0.0479072	0.149689	0.189776	0.080006	0.032616	0.184933	0.196193	0.165626	0.106136	0.0722583	0.15362	0.18826	0.0755725	0.121282	-0.0635935	0.194175	0.0182098	-0.00208296	0.163415	0.0173083	0.265142	0.205642	0.202351	0.467696	0.485307	0.4297	0.430506	0.42706	0.457345	0.054728	-0.241005	0.163238	-0.0129174	0.377181	0.44431	0.295118	0.242047	0.408827	0.442672	0.4436	0.441426	0.466843
AATTGATC	-0.186012	0.0600376	-0.0801772	0.0308138	-0.0374502	0.0210066	-0.261261	0.140133	0.0630125	0.211239	-0.175696	0.101402	0.290454	0.275616	-0.0848238	0.103558	-0.138091	0.203193	-0.0737758	0.0528838	-0.111919	0.192783	0.0279344	0.14273	0.0571849	0.141534	0.0726866	-0.0663548	-0.0964278	0.000709798	0.401307	0.471473	0.423835	0.448991	0.295302	0.415181	-0.280134	-0.0118242	0.159745	0.101513	0.226386	0.43377	0.259291	0.161202	0.319972	0.353426	0.406804	0.407157	0.43702
ATTTGATC	-0.177211	0.0622348	0.010183	0.080493	-0.132422	-0.0869155	-0.172584	-0.0426052	0.0878032	0.169997	0.090009	0.0828092	-0.0352846	0.0321796	0.0763071	0.018476	-0.135556	-0.0990787	-0.0601511	0.120384	0.0197185	0.0951173	-0.0148909	0.147023	-0.00192478	0.0728405	0.0253299	0.0873784	0.0950862	0.210586	0.354336	0.442578	0.398207	0.461739	0.248306	0.356907	-0.198297	0.0600095	0.062541	0.0477069	0.310865	0.426639	0.119157	0.267067	0.340225	0.361377	0.452973	0.428928	0.40566
AAATGATC	-0.0884982	-0.204576	-0.108619	-0.0605363	-0.207058	-0.0827035	-0.209151	-0.129585	-0.192812	-0.0401605	-0.218046	-0.0822668	0.290749	0.231927	-0.18962	-0.0518704	-0.226922	-0.0316256	-0.201637	-0.0276074	-0.374715	-0.114327	-0.202365	-0.0334298	-0.26968	-0.103905	-0.157025	-0.270553	-0.217914	-0.0933547	0.441792	0.472493	0.355222	0.445933	0.214445	0.42247	-0.244733	-0.134969	-0.0950596	-0.0875264	0.3073	0.461699	0.137468	0.0135894	0.139269	0.179707	0.0396044	0.279025	0.375651
GGATCAAA	0.0402512	-0.0810861	0.0618794	-0.014966	-0.0804848	0.0471909	-0.0988997	-0.0581792	-0.0124594	0.150737	-0.0336792	0.00482285	0.423215	0.424793	-0.0426619	0.127725	0.0346042	0.194145	-0.0435335	0.0793582	-0.0884546	0.00889974	0.0158407	0.13571	-0.0686487	-0.0924059	-0.10381	0.0167699	0.0964385	0.100428	0.441181	0.471193	0.383952	0.438994	0.302827	0.369616	-0.161083	0.0314716	-0.00831777	0.0128296	0.37357	0.456064	0.201469	0.244528	0.322495	0.341086	0.174613	0.348722	0.424384
GATCAAAA	0.00793405	-0.0282086	-0.0797607	0.130827	0.109425	0.305078	-0.239362	-0.0501008	-0.347237	0.0238493	-0.102872	-0.0332203	0.178033	0.127463	-0.126761	0.0724596	-0.078147	-0.109745	-0.156067	0.0217417	-0.331605	-0.12815	-0.0708494	0.0576631	-0.295861	-0.0583381	-0.111295	-0.307935	-0.297469	0.0639696	0.429132	0.452068	0.398963	0.399164	0.336675	0.321862	-0.204866	-0.266555	-0.196658	0.00788985	0.284286	0.410492	0.25406	0.145206	0.192657	0.324041	0.171571	0.414062	0.460168
GGGATCAA	-0.0010868	-0.0928251	-0.0796869	0.128244	0.145657	-0.0508518	0.0327064	0.0486289	-0.0934521	0.104202	-0.14318	0.0488622	0.386458	0.336832	-0.00393932	-0.0220957	-0.0736326	0.0749852	-0.017212	0.112898	-0.174473	-0.08317	-0.188273	0.0510275	-0.0269578	0.012031	0.00129532	0.00256818	0.134167	0.194018	0.410671	0.448531	0.266852	0.417624	0.270263	0.316371	-0.0239436	0.139023	-0.185699	0.0761954	0.0792457	0.37416	0.226365	0.214729	0.315931	0.41642	0.280416	0.443695	0.435038
CTTTGATC	-0.0632273	0.0643692	-0.0561665	0.141416	-0.0129969	-0.0942208	-0.107007	0.0860479	-0.206048	0.127688	0.0255934	-0.118776	-0.14034	0.00538457	-0.183565	0.0515591	-0.0387594	0.0331248	-0.181816	0.0294852	-0.128735	-0.127246	-0.038796	-0.0484836	-0.153462	0.163658	0.0338818	-0.0629004	-0.0317787	0.175293	0.349821	0.392919	0.127157	0.193841	0.101052	0.1749	-0.0683847	-0.0884836	-0.0660531	0.134769	0.0606254	0.102176	0.137839	0.181838	0.202977	0.383325	0.301085	0.435637	0.436588
CGTTGATC	-0.0757593	-0.0260168	-0.0728539	-0.00278833	0.13539	-0.0403453	0.136013	0.0240174	0.0328497	0.157773	0.000558415	0.115108	0.299397	0.369054	-0.0401793	0.0638661	-0.0710895	0.162779	-0.0318039	-0.0831951	-0.0401601	-0.0241994	-0.0871019	0.103286	0.0318223	0.162376	-0.0345305	0.0231407	0.085365	0.161809	0.398499	0.387095	0.435575	0.386396	0.346949	0.334986	-0.00106703	0.0549079	-0.00213681	0.178272	0.264445	0.336281	0.242632	0.303232	0.418514	0.419523	0.260047	0.303965	0.447259
CAGATCAA	-0.154516	0.129034	0.0173475	0.058347	0.0304161	0.00483925	-0.156543	-0.0508201	-0.0209521	-0.101547	0.0808355	0.0318945	0.13136	0.0367309	0.0744268	-0.0792379	0.0222761	-0.0956198	0.151549	0.000184487	0.000308769	-0.0866171	0.124785	-0.0507562	-0.118177	0.120785	-0.078304	0.0402801	0.246611	0.113438	0.435336	0.420515	0.358742	0.29289	0.232114	0.0600816	0.146571	0.0484942	0.0702547	-0.114388	0.154758	0.23456	0.330176	0.206984	0.402011	0.340492	0.430685	0.349117	0.484564
ACTTGATC	0.0956829	-0.0517717	0.274059	-0.0373074	0.277187	0.25374	0.158679	-0.044592	0.126671	-0.00351268	0.317563	0.0355169	0.267296	0.101982	0.135925	0.0759745	0.331072	0.0271521	0.252119	-0.108145	0.115515	-0.0528085	0.239701	0.0411864	0.0906075	0.105118	-0.000847977	0.135382	0.34858	0.136238	0.471606	0.421741	0.4151	0.272907	0.448591	0.349135	0.142965	0.115252	0.180152	0.227694	0.274525	0.202216	0.272129	0.0663859	0.401824	0.380118	0.467052	0.291595	0.466409
GATCAATA	-0.283565	-0.0443863	-0.0769845	-0.0627141	-0.0751698	0.0614146	-0.287943	0.0360273	-0.227084	-0.0477758	0.0628446	0.00294954	0.157324	0.157845	-0.100922	0.0267857	-0.164016	0.0650618	-0.0333033	0.119901	-0.164589	-0.00245342	-0.0751553	0.0544688	-0.276195	0.0633137	-0.00956518	-0.193554	0.0767801	0.130165	0.450176	0.442326	0.278995	0.141405	0.0805099	0.121135	-0.128483	0.062655	-0.0457645	0.0556489	0.0373109	0.186955	0.272136	0.258518	0.396866	0.344149	0.474786	0.368094	0.479381
AGTTGATC	0.0257421	-0.0944473	0.0828776	-0.0424107	0.124956	0.0306902	0.0448424	0.106497	0.176394	-0.0563713	0.102126	-0.0621353	0.0183898	0.0544973	0.0680612	0.0779524	0.240925	-0.0636008	0.00553309	-0.117783	0.0693931	-0.0620209	0.0396815	0.149767	0.110307	-0.0115569	0.0760688	0.183754	0.285008	0.338537	0.39004	0.439471	0.32354	0.309885	0.386625	0.390692	0.132831	0.101642	0.221213	0.146571	0.265981	0.27675	0.226698	0.268335	0.382232	0.385965	0.439257	0.429354	0.456444
CATTGATC	-0.213727	0.196695	-0.154668	0.0968024	-0.173518	0.0109439	-0.215739	0.165591	-0.133255	0.0503677	-0.248545	0.144498	0.137865	0.148488	-0.222915	0.133558	-0.0981941	0.221093	-0.084685	0.182546	-0.221538	-0.075466	-0.0351421	0.0824358	-0.0767782	0.240069	0.127031	-0.193181	-0.00331729	0.234223	0.428577	0.457849	0.310406	0.370391	0.255427	0.297388	-0.271444	0.0387183	-0.128233	0.193478	0.00493933	0.319819	0.133642	0.31363	0.284196	0.350932	0.430136	0.421238	0.411908
AACTGATC	0.195594	0.240221	0.203036	0.124956	0.0607426	0.0587225	0.174953	0.195769	0.201226	-0.0533972	0.246772	0.288835	0.387347	0.373517	0.244637	0.233831	0.289401	0.205999	0.237354	0.356807	0.135924	0.0463045	0.155052	0.0476177	0.08305	0.127871	0.197677	0.23692	0.329937	0.20889	0.441829	0.467016	0.231091	0.268757	0.0380808	0.171834	0.0546318	-0.0741463	0.217368	0.143263	0.234492	0.331163	0.130432	0.295951	0.26217	0.277545	0.443135	0.443218	0.467814
TATGATCA	0.262202	0.212302	-0.0965392	0.108576	-0.0573941	-0.0609547	0.199715	0.094249	0.108008	-0.22321	0.169441	0.188086	-0.010298	0.114278	-0.0587358	-0.114691	0.111159	0.182276	-0.0718714	0.0684753	0.142199	0.0964033	-0.185699	-0.14828	0.000208395	0.181539	0.140556	0.215815	0.236962	0.264144	0.359758	0.447938	0.180635	0.356798	-0.0164604	0.298716	-0.00582253	-0.222915	0.0806693	0.14242	0.168407	0.281617	0.0366792	0.245819	0.181803	0.331613	0.463611	0.487613	0.473971
ATGATCAT	-0.0545555	0.0682362	-0.117328	-0.0784944	-0.043779	-0.228067	-0.01911	0.0702584	-0.173518	-0.1451	-0.0960673	0.0953017	0.256704	0.290278	-0.104528	-0.0317783	0.0229692	-0.109745	-0.0420777	0.178672	-0.324718	-0.292812	-0.161439	-0.202965	-0.183268	0.0883602	0.0437261	-0.0705188	-0.00161068	0.262315	0.411802	0.47011	-0.12993	0.129887	-0.103668	-0.0496506	-0.254668	-0.175696	-0.134486	0.0875176	-0.184771	0.0763776	0.108219	0.117877	0.195634	0.277801	0.412783	0.486942	0.465201
GCTGATCA	-0.011037	0.177248	0.0951198	-0.0319147	0.142638	-0.145223	0.111022	0.303989	0.195383	-0.119314	0.164977	0.144853	0.335522	0.309311	0.0520361	0.132004	0.042862	-0.0272253	-0.00998782	0.168216	-0.0650651	-0.129499	0.0838529	0.0339822	0.0198368	0.0485479	0.197241	0.122008	0.207639	0.257869	0.45041	0.459543	0.154983	0.234014	0.00958254	0.0807854	-0.0345898	-0.0147995	-0.0268848	0.123285	0.148995	0.199295	0.0669569	0.167475	0.214935	0.282244	0.4222	0.477912	0.476001
ATGATCAG	-0.270333	-0.166154	-0.237986	0.0168189	0.0645854	-0.0452386	-0.124642	0.0566214	-0.177469	-0.0172017	-0.292082	0.107907	0.460149	0.4443	-0.0787104	0.0345909	-0.195468	0.0250905	-0.273755	0.171461	-0.419044	-0.0887449	-0.180967	-0.0661524	-0.231605	0.229239	0.0633045	-0.192812	0.0117131	0.366523	0.455452	0.479004	-0.0377579	0.237712	0.203356	0.221514	-0.309474	-0.0163037	-0.218509	0.141712	-0.346344	0.135527	0.252497	0.298889	0.172199	0.382008	0.358338	0.475675	0.453511
CTGATCAG	-0.0785805	0.193942	-0.139362	0.124219	0.106783	-0.119382	0.022688	0.199494	0.0500473	0.0423569	0.131284	0.321102	0.490263	0.489039	0.141895	0.319101	-0.0233277	0.0766345	-0.0192556	0.295022	-0.181248	-0.0848728	-0.106048	0.0965183	0.0162681	0.137418	0.126435	-0.00195512	0.206417	0.195888	0.482269	0.481912	0.238813	0.338753	0.278304	0.328986	-0.0748204	-0.228735	0.0270394	0.0762174	0.0873642	0.281411	0.252553	0.297268	0.316704	0.36329	0.456612	0.470463	0.478392
TCTGATCA	-0.186012	0.142171	-0.100922	0.128714	-0.0930114	-0.166154	-0.0855382	0.186958	-0.0096998	0.14761	0.0103947	0.0940855	0.427426	0.402019	-0.155596	0.106925	0.0220601	0.21358	0.0131309	0.191372	-0.173518	0.128658	-0.037117	0.0971083	-0.0755204	0.122538	0.0249429	-0.052892	0.116708	0.142233	0.477597	0.488575	0.258508	0.361594	0.3049	0.289718	-0.181248	0.0228024	0.0642805	0.162064	0.068552	0.354624	0.162449	0.180604	0.318019	0.373664	0.466876	0.428887	0.48622
TGATCAAA	-0.157512	0.0507155	0.0379868	-0.0151366	0.106552	-0.0493663	-0.0340117	0.0346709	0.0621264	-0.0183778	-0.0740925	0.110563	0.375755	0.386604	-0.0741028	0.055578	-0.000391977	-0.169897	0.143047	0.0378147	-0.0130823	-0.072551	0.0400334	-0.0122717	0.0186646	0.103548	-0.0535645	0.00279047	0.134341	0.180881	0.481326	0.479722	0.180217	0.279748	0.159737	0.192124	-0.142597	-0.117849	-0.00386924	0.00386007	-0.0271696	0.171823	0.192156	0.0785074	0.300349	0.327565	0.460462	0.44489	0.480856
CTGATCAA	0.069316	0.224538	0.185734	-0.00858389	0.111375	0.0662516	0.131304	0.257637	0.0523952	0.100321	0.0514843	0.0683927	0.244007	0.266591	0.0215664	0.146958	0.213168	0.00819127	0.0718444	0.243663	-0.0337209	-0.105159	0.180714	0.0315639	0.0425122	0.14182	0.147265	0.106569	0.203744	0.365804	0.475817	0.479062	0.188468	0.272769	0.175902	0.267189	-0.182974	-0.0321189	-0.112321	0.101996	0.0173711	0.177252	0.207212	0.224738	0.302743	0.324884	0.470001	0.485926	0.475665
ACTGATCA	0.0987516	-0.074075	0.235169	0.0364649	0.0903341	0.0967183	0.175328	-0.0515669	0.245624	0.10649	0.220155	-0.0895872	0.273745	0.294324	0.17263	-0.0183273	0.31144	-0.0246234	0.267702	-0.0421874	0.0604034	-0.221824	0.178269	-0.0661099	0.10255	-0.143771	-0.172584	0.242002	0.303735	0.205442	0.489149	0.48935	0.297602	0.325445	0.411283	0.384888	0.184676	-0.165758	0.193793	0.0313208	0.310764	0.314314	0.200625	0.111577	0.389829	0.403865	0.485628	0.471603	0.488564
ATTGATCA	-0.255129	-0.0117233	-0.11343	-0.0831547	0.132583	0.0101342	-0.154363	0.0578939	0.0043613	-0.00478316	0.0441117	-0.102411	0.169528	0.262616	-0.248413	-0.156384	-0.187615	0.214901	-0.159176	-0.221968	-0.14023	-0.144009	-0.10804	-0.217849	-0.242946	0.0836188	-0.158004	-0.0699596	0.238738	0.163572	0.490077	0.495794	0.199338	0.245983	0.409179	0.372945	0.00809993	-0.00872371	0.118877	0.105461	0.217477	0.342122	0.158429	0.237198	0.355479	0.411686	0.466122	0.441224	0.492022
TTGATCAA	-0.0100705	0.114232	0.0667541	-0.170553	-0.0225584	-0.291364	-0.049282	0.00214891	0.0113019	-0.133068	-0.00344282	-0.0291479	0.0863729	0.172352	-0.135164	-0.0402316	0.0806743	0.124372	-0.00771848	-0.108249	0.00838719	-0.190658	0.00849471	-0.161618	-0.11512	0.0282359	-0.0770428	-0.00934818	0.178932	0.158234	0.485724	0.477983	0.207211	0.144017	0.0768399	0.231283	-0.164397	-0.0179628	0.0943657	0.145445	0.149589	-0.024839	0.0651009	0.147522	0.297117	0.321526	0.478427	0.476249	0.488851
GTTGATCA	0.278409	0.253065	0.144356	0.0629803	0.142767	-0.14168	0.186086	0.1355	0.0185656	0.0050701	0.0733434	-0.130016	0.253019	0.214013	0.0366642	0.104268	0.325812	0.161431	0.176871	0.139106	-0.0145395	-0.150864	0.0465371	-0.107727	-0.0618768	-0.0832674	-0.0710349	0.0412062	0.233533	0.13125	0.48185	0.47315	0.284625	0.241128	0.357659	0.140406	-0.0458164	-0.0577561	0.0510111	0.0745077	0.16464	0.0802926	0.209653	0.0213973	0.292434	0.252503	0.483097	0.459918	0.492763
GTGATCAA	0.469961	0.412184	0.228073	0.0534631	0.213599	-0.286328	0.428996	0.31908	0.0626973	-0.150864	0.210732	0.0879665	-0.0499078	-0.108778	0.261816	0.0265643	0.336714	0.0620733	0.297006	0.252176	0.0334552	-0.228651	0.044883	-0.331695	0.139779	-0.136552	-0.0750498	0.303704	0.354299	0.327151	0.472547	0.405877	0.354884	0.0818433	0.306907	0.11603	-0.0574409	-0.113077	0.15194	-0.257675	0.23022	-0.0482916	0.412971	0.0730222	0.36834	0.0965766	0.497927	0.480463	0.492492
GTGATCAC	0.23558	0.235576	0.155971	0.0194609	-0.00184346	-0.0818954	0.255259	0.148344	0.0895096	-0.243533	0.197609	0.0872049	0.228494	0.133312	0.164662	0.041865	0.237432	0.0154153	0.217515	0.108244	0.0663735	-0.24023	0.124353	-0.0845108	-0.000533581	0.00488018	-0.0541187	0.216793	0.298741	0.303657	0.462944	0.449217	0.301035	0.0934501	0.355067	0.274533	0.0835836	-0.137572	0.215374	-2.21112e-05	0.18584	0.0643029	0.276258	0.231346	0.362645	0.260015	0.495643	0.494764	0.486924
AGTGATCA	0.109764	0.124743	0.144771	0.0794131	-0.00687603	-0.178781	0.110522	0.0546252	0.16172	-0.0455059	0.14382	0.0277366	0.220122	0.0950035	0.143855	-0.0224099	0.15613	-0.0143637	0.0360636	0.0371358	0.0339279	-0.092277	0.124677	-0.0705977	0.130923	0.221211	-0.00244492	0.248076	0.278633	0.243139	0.451301	0.466316	0.241285	0.379125	0.203666	0.307669	0.0397408	-0.124336	0.0645701	0.150193	0.196956	0.295141	0.218443	0.214918	0.390141	0.398837	0.491642	0.495296	0.478789
AATGATCA	-0.0520056	0.0111528	0.0984111	-0.135458	0.0790722	0.0882045	0.111035	-0.0560194	0.164612	-0.170553	0.191049	-0.00538652	-0.0296949	0.00686489	0.10435	-0.153018	0.054687	-0.0199675	-0.0389083	-0.156864	0.0291297	-0.160906	0.0605702	-0.202872	-0.0177767	-0.132239	-0.047699	0.183095	0.200623	0.0969423	0.435183	0.448528	0.141724	0.0586402	0.0266286	0.169799	0.0299763	-0.155129	0.0446383	0.0459697	0.123094	0.0500532	0.0420558	0.0537649	0.301697	0.119288	0.489047	0.487813	0.479202
GATGATCA	0.246985	0.275058	0.214894	-0.0836016	-0.0349268	0.00894483	0.194609	0.0815989	-0.0879219	-0.100349	0.176697	-0.0557174	0.123357	0.0638284	0.2435	0.121501	0.185067	0.0471649	0.0935477	0.203477	-0.0260023	-0.183863	0.110044	-0.156703	0.0164533	0.131585	0.041467	0.0177222	0.258353	0.168621	0.427796	0.423522	0.197728	0.0374515	0.151718	0.119138	0.0451381	-0.166354	0.114998	0.123852	0.141607	0.00337481	0.0970629	0.162371	0.25331	0.140372	0.486293	0.485661	0.469449
ATGATCAC	0.0195069	-0.040947	-0.0146004	-0.242136	0.124595	-0.21343	0.0741991	-0.224336	-0.156864	-0.0973978	0.0132515	-0.292445	0.0348596	-0.101818	-0.00773487	-0.248017	0.0941198	0.00222064	0.0837609	-0.133819	-0.217587	-0.330539	-0.0209142	-0.264397	-0.161618	-0.192445	-0.286328	-0.0483744	0.27905	0.150111	0.464036	0.426267	0.186421	-0.200218	0.0642037	-0.21891	-0.210679	-0.233442	-0.0131917	-0.159176	0.047842	-0.0934316	0.166412	-0.0455204	0.289251	0.0350089	0.497828	0.477342	0.488605
GGTGATCA	0.329551	0.352599	0.0713027	0.0460787	-0.0610845	-0.193554	0.25984	0.24749	-0.0358609	-0.0219013	0.192935	0.102149	0.41121	0.277902	0.213792	0.172724	0.305679	0.172028	0.164139	0.294045	-0.202228	-0.148017	0.00411688	-0.112494	0.0856406	-0.124109	0.118816	0.0490246	0.291359	0.240218	0.451604	0.459352	0.202339	0.0887733	0.21804	0.115278	-0.0442195	-0.238195	0.0221365	-0.0283174	0.0242074	-0.13536	0.147905	0.0173826	0.295266	0.181454	0.490757	0.435785	0.486907
CTGATCAC	0.00124504	0.0238562	0.223779	0.0462304	0.0526215	-0.0936445	0.0832223	-0.00432775	0.253277	0.0186159	0.239246	0.0800429	0.287418	0.226544	0.20242	0.0280165	0.28548	0.0147533	0.21678	0.154741	0.0452105	-0.0516645	0.152369	0.0718896	0.079006	-0.102549	-0.0885492	0.293995	0.279843	0.0758853	0.462938	0.472277	0.193581	0.153634	0.151577	0.247696	0.0888809	-0.00364681	0.226688	0.117835	0.287035	0.118729	0.157638	0.0784663	0.355685	0.286304	0.479142	0.434365	0.479337
ATGATCAA	0.448177	0.427035	0.35773	0.241688	0.141562	-0.214206	0.411256	0.350321	0.0756569	0.0528789	0.324339	0.191421	0.398416	0.221483	0.419819	0.281044	0.464891	0.147727	0.421699	0.446999	0.094454	-0.156703	0.143469	-0.156067	0.347636	-0.134486	0.157058	0.25406	0.29343	0.217792	0.470094	0.457922	0.334065	0.263904	0.307604	0.127568	0.00219493	-0.309313	0.159097	-0.0580905	0.265931	-0.0277542	0.330596	-0.0799847	0.307471	0.1618	0.482183	0.416809	0.488104
TGATCACA	0.446849	0.410956	0.115725	0.0669718	0.128301	-0.149349	0.312631	0.307603	-0.0721269	-0.0457221	0.0989873	-0.0117871	0.180122	0.141234	0.160234	0.111092	0.243146	0.217995	-0.0209327	0.183542	-0.125104	-0.0673332	-0.0410857	-0.178516	-0.151004	-3.24974e-05	0.0608202	-0.051788	0.232026	0.223983	0.458182	0.439748	0.203353	0.176481	0.237624	0.0498288	-0.0327282	0.0427191	-0.0681661	0.0477241	0.07335	0.00474369	0.249525	0.126947	0.235059	0.179219	0.483498	0.431141	0.483852
CGTGATCA	0.270425	0.230997	0.0316196	-0.0878939	-0.0046049	-0.0293479	0.227775	0.111155	0.113491	0.0147284	0.107996	0.0163817	0.224117	0.0159037	0.0752764	-0.0365682	0.16547	0.00191042	0.196742	0.0315619	0.0556314	-0.127654	-0.0192272	-0.0701509	-0.0419035	0.119502	-0.102733	0.204492	0.31769	0.0931573	0.441258	0.450329	0.177782	0.0931745	0.241074	0.295496	0.171388	-0.101682	0.195875	0.178753	0.249866	-0.101728	0.186898	0.0708105	0.251195	0.251151	0.479089	0.411432	0.449051
AGTGGTCA	-0.1266	0.133492	-0.0205536	0.131838	-0.0135683	0.0227483	-0.00418749	0.0957689	-0.0749719	-0.0257582	0.0419896	0.0455244	-0.0893493	0.114223	-0.109098	0.0173645	-0.0625978	0.0881362	-0.0310351	0.120249	-0.102228	-0.0896627	-0.0314132	-0.123958	-0.124872	-0.0495036	-0.0402302	-0.104721	0.201887	0.184626	0.402323	0.40708	0.327356	0.340046	0.275003	0.292249	-0.0841291	-0.0985173	-0.12652	0.0383749	0.213776	0.25857	0.315886	0.177344	0.386332	0.325148	0.466201	0.456951	0.467119
AAGTGATC	0.14577	-0.0491817	0.11794	-0.106098	-0.0475944	-0.0441186	-0.0709854	-0.122988	-0.18041	0.110718	0.0206003	-0.206651	0.239825	0.0737723	0.236057	-0.136051	0.113544	-0.0221834	0.180616	-0.0896737	-0.123062	-0.163078	0.0235083	-0.120901	-0.101592	-0.159346	-0.170553	-0.0792083	0.0133099	0.139478	0.34866	0.431311	0.407751	0.410887	0.338979	0.279598	0.0324086	-0.160033	-0.278781	-0.195861	0.156694	0.351258	0.367518	0.115586	0.367451	0.330624	0.473201	0.485761	0.449677
AGGGATCA	-0.198716	-0.00217761	-0.0325923	-0.134199	0.0580768	-0.0811111	-0.0680534	-0.182974	-0.141005	-0.0504094	-0.139686	0.134738	0.138974	0.218458	-0.17122	-0.137161	-0.0045174	-0.0661795	-0.0722599	-0.0221783	-0.127246	-0.273049	-0.169037	-0.0821365	-0.0626169	-0.0656095	-0.182681	-0.0023496	0.215409	0.363961	0.269005	0.208204	0.397375	0.279664	0.310629	0.279818	-0.139147	-0.192812	-0.00129123	-0.0955923	0.0108662	0.219902	0.117208	0.0903578	0.320191	0.306878	0.486967	0.464511	0.435035
AGCGATCA	-0.0216051	-0.166555	0.0066954	-0.0131068	0.0671043	0.116386	0.0402786	-0.173993	0.173563	-0.042147	0.0193086	-0.134008	-0.0354376	0.0187687	-0.0181628	-0.156225	0.0181311	-0.189279	-0.013934	-0.117653	0.103402	-0.351856	0.00851264	-0.13019	0.134728	-0.0905253	-0.160033	0.178905	0.189866	0.0848811	0.368312	0.37407	0.339892	0.172479	0.176175	0.0779573	0.0122423	-0.184164	0.233113	0.00261781	0.174071	0.180514	0.118194	-0.0283006	0.326785	0.146614	0.48707	0.435833	0.433829
AGATGATC	0.298235	0.159085	0.129187	-0.0770858	0.0305857	-0.2	0.337391	0.171448	0.0309166	-0.0504758	0.287573	-0.0522601	0.0872884	0.0930251	0.111616	0.0232272	0.16662	-0.0909023	0.103291	-0.00258279	0.105437	-0.217005	0.00890834	-0.12204	0.0356362	-0.0838204	-0.185078	0.150849	0.253133	0.0389072	0.40539	0.410447	0.103038	0.0432249	0.300398	0.126313	0.260229	0.0408016	0.0946497	0.110858	0.219951	-0.107366	0.310964	0.0323115	0.351935	0.28207	0.474564	0.433683	0.4405
AGTGACCA	-0.0897186	-0.217005	0.146748	-0.082501	0.14672	-0.0586999	-0.0364202	-0.226841	0.0696361	-0.0713968	0.0966728	-0.0338907	0.135914	0.0430672	0.160786	-0.13363	0.150659	-0.0943873	0.0285862	-0.0242209	0.0485799	-0.239794	0.135441	-0.122475	-0.0608777	-0.146852	-0.185699	0.210897	0.272176	0.146764	0.369348	0.268988	0.399856	0.235192	0.352517	0.219451	0.035015	-0.2266	0.0880587	-0.122403	0.237344	0.230441	0.283776	-0.0716253	0.378211	0.258844	0.467434	0.436918	0.441894
GCGATCAA	0.00466485	0.00745078	0.0894615	-0.0765086	0.0722721	0.100776	-0.0458391	0.0842101	0.12063	-0.0929818	0.15694	0.0481741	0.115295	0.035997	-0.01565	-0.0686348	0.0397278	0.0187449	-0.016034	0.058094	0.0325562	-0.113608	0.10365	-0.0307238	0.00398751	0.114782	0.0508655	0.136093	0.240744	0.186008	0.353714	0.37463	0.366496	0.279444	0.358162	0.324118	0.0203171	-0.0147018	0.0545441	0.102823	0.244368	0.315226	0.265242	0.210348	0.375663	0.346948	0.469796	0.424447	0.451321
CAATGATC	0.328331	0.384394	0.25349	0.247827	0.000672825	0.120246	0.321521	0.375068	-0.0497192	0.0591497	0.141247	0.220634	0.193707	0.0933929	0.262363	0.26177	0.370766	0.248095	0.22255	0.376493	-0.045893	0.0749304	0.113295	0.138794	0.191165	0.124775	0.265879	0.0297818	0.168572	0.310393	0.370652	0.350178	0.34364	0.2687	0.256412	0.174138	-0.248678	-0.132606	0.0423081	0.185708	0.0548772	0.0574143	0.165055	0.088501	0.325931	0.259469	0.462384	0.405119	0.461923
ATGTGATC	0.0143735	0.172618	0.0265958	-0.167366	0.00564002	-0.0607804	0.0409239	-0.0731612	-0.0933771	-0.162525	0.00900929	-0.0557425	-0.0844749	0.00644797	-0.089768	0.0162059	0.0309824	-0.147237	-0.0588257	-0.0820066	-0.0965556	-0.278252	0.00757283	-0.125104	-0.225026	-0.0746139	-0.187615	-0.0690176	0.260869	0.19453	0.341598	0.397668	0.176538	0.0562332	0.340887	0.3471	-0.0959081	-0.181816	0.0819642	-0.0192316	0.167047	0.152635	0.228143	0.0590371	0.246654	0.26194	0.471878	0.394925	0.429686
CAGTGATC	0.391921	0.381074	0.193834	0.0126061	-0.0154515	-0.0880493	0.25757	0.00586268	0.0760487	-0.0198223	0.301505	-0.0314905	0.205571	0.155199	0.27343	0.0599766	0.328135	0.0553109	0.235023	0.184541	0.130846	-0.0569396	0.0848149	0.138326	0.192245	0.018534	0.145096	0.262214	0.169669	0.0395497	0.37696	0.346473	0.171963	0.0616756	0.223853	0.164011	0.0401882	-0.235655	0.13449	0.179858	0.192813	-0.0644395	0.177695	0.0392975	0.234117	0.181266	0.459408	0.372857	0.427158
ATGACCAC	-0.0389586	0.012967	0.0275739	0.0283571	-0.0723934	0.045837	-0.214752	-0.0807394	-0.0838081	-0.0203443	-0.0621771	0.0266661	-0.0378848	0.189973	0.0521587	-0.0252016	0.108981	-0.220135	0.0392432	-0.0312174	-0.177211	0.0864513	-0.0683438	-0.00239565	-0.148413	-0.0627316	-0.0260471	-0.0567355	0.0184558	0.202114	0.0742079	0.151978	0.0970463	0.213437	0.133576	0.137261	-0.0469848	-0.0343009	-0.100524	-0.109745	0.0734429	0.00621941	0.143821	0.0243009	0.174317	0.261805	0.451883	0.40104	0.310229
GGCGATCA	-0.0277084	0.116823	0.0575396	0.075847	-0.0976336	-0.133442	0.066138	-0.114813	0.0867185	-0.052508	0.203998	-0.147237	0.0362598	0.116767	0.0366671	-0.0157975	0.0224163	-0.0724461	0.00814798	0.108651	0.114242	-0.167366	0.0150442	-0.0594485	-0.0266969	-0.00677328	-0.111805	0.157615	0.161304	-0.0834468	0.38962	0.407875	0.217589	0.0798678	0.226409	0.269519	0.161931	-0.111182	0.195712	0.00298868	0.223101	0.226583	0.197869	0.0450968	0.310065	0.268671	0.462018	0.441028	0.386814
AATGACCA	-0.110458	-0.23019	-0.205159	-0.249757	-0.00333496	0.0214359	-0.145717	-0.108725	-0.181531	-0.149349	-0.136653	-0.265365	-0.10048	-0.175203	-0.179317	-0.227819	-0.0963044	-0.0930791	-0.0904705	-0.230803	-0.32668	-0.242829	-0.270333	-0.156543	-0.250585	0.0213415	-0.0999826	-0.152433	0.0154328	0.258671	0.240513	0.324686	0.0290083	-0.103152	-0.0590571	-0.0442062	-0.248149	-0.170997	-0.202045	-0.292445	-0.135164	0.037271	0.0765007	0.0826479	0.0835808	0.239006	0.449707	0.456774	0.432938
CGGTGATC	-0.145223	-0.024449	-0.122988	-0.177211	-0.0274172	0.0826943	-0.280688	-0.0221827	-0.150446	0.0483015	-0.278252	-0.0859721	-0.173755	-0.102	-0.261439	-0.101189	-0.101773	-0.023842	-0.0708967	-0.0942391	-0.308938	-0.178781	-0.0862345	-0.129671	-0.231695	0.012725	-0.105601	-0.0662627	-0.0581863	0.278403	0.257366	0.31771	0.0661943	0.145998	-0.103574	0.0312568	-0.274473	0.0598013	-0.195861	0.0912658	-0.0157679	0.123131	0.216935	0.0858629	0.272125	0.287767	0.458953	0.447929	0.373129
AGGTGATC	-0.136552	0.0432378	0.102504	0.112454	0.0361573	0.18589	-0.187943	0.0909048	-0.00276564	-0.0659312	0.066881	0.169647	0.0810544	0.173086	0.0826748	0.168582	0.0781727	0.00170283	0.164391	0.164898	-0.0311561	0.00984378	0.11844	0.127676	0.0659336	0.258856	0.116613	0.0370715	0.0973256	0.222513	0.354778	0.427633	0.309549	0.425383	0.344478	0.421274	-0.00214073	0.0496238	0.0940322	0.172454	0.0805931	0.359827	0.174317	0.294462	0.285009	0.389869	0.419514	0.466413	0.422396
GATCATTA	0.171531	0.0744514	0.150118	0.00727652	0.131736	0.00392435	0.12706	0.0572378	-0.12161	-0.0534082	0.234754	-0.172816	0.160062	-0.128735	0.124161	-0.0549175	0.129048	-0.0328739	0.163126	-0.0710607	-0.1065	-0.144249	0.13325	0.0328739	0.0161139	0.0836325	-0.0967954	-0.0234077	0.250814	0.380365	0.394145	0.379992	0.223873	0.238902	0.235206	0.348125	-0.019059	-0.150169	-0.132514	-0.0170577	0.0598684	0.205356	0.231544	0.129992	0.320476	0.377482	0.380578	0.469426	0.456337
GAGTGATC	0.20971	0.226385	-0.103527	-0.0436755	-0.0618358	-0.219723	0.171695	0.193348	-0.0745669	-0.0725281	0.0606082	-0.040735	-0.00232329	0.0860063	-0.131785	-0.105998	0.0177069	0.0778612	-0.13363	0.0812985	-0.173049	-0.104576	-0.131158	-0.0825472	-0.228904	0.0670624	0.0828092	-0.0707184	0.0714006	0.176785	0.400808	0.415939	0.019266	0.0990252	-0.070495	0.0332403	-0.0890908	-0.114509	-0.0518025	0.159202	0.116808	0.0610743	-0.195468	0.0626523	-0.00397728	0.204974	0.361384	0.462299	0.463869
CATGATCA	0.0838325	0.0086075	-0.083688	0.000839745	0.0307606	-0.013469	0.123465	0.015777	-0.0685141	-0.0867238	0.0154638	-0.111238	-0.062341	0.0432623	-0.0589221	-0.0936456	0.121235	-0.0574176	0.00368679	-0.0938054	-0.173283	-0.144612	-0.0247725	0.0283349	-0.19431	0.17771	0.00554624	0.00511158	0.172104	0.113016	0.341443	0.316321	0.145453	0.0637638	0.19582	0.00915361	-0.103621	0.043473	-0.162525	0.0530665	0.0836792	-0.0185789	0.169946	0.223073	0.16894	0.19476	0.446962	0.436972	0.459297
GATCACCA	0.409818	0.384996	-0.00603565	0.127697	-0.0804493	-0.154668	0.230961	0.0554307	0.00997179	0.00249279	0.126697	0.180952	0.388703	0.376628	0.143844	0.171886	0.176915	-0.0941236	0.097038	0.295072	-0.138616	-0.069689	-0.104528	0.0774814	0.206341	-0.00160216	0.0988498	0.0612052	0.140147	0.147109	0.395544	0.449678	0.0936994	-0.0959758	0.0920688	0.0371678	0.0282965	-0.0221556	0.0858426	0.104761	-0.0141669	-0.153165	0.087939	-0.0286106	0.205945	0.189931	0.438417	0.412626	0.451038
CTGACCAC	0.44076	0.403431	0.30041	0.0800292	-0.121042	-0.251713	0.257489	0.0256676	0.122163	-0.174958	0.417111	0.217582	0.179995	-0.0605457	0.156332	0.106446	0.314124	0.134827	0.18854	0.258782	0.236163	0.0529787	0.173756	-0.0126739	0.359256	0.155283	0.221188	0.0305723	0.18133	0.0259226	0.451259	0.356267	0.361635	0.132089	0.370105	0.226909	-0.00542833	-0.0259172	-0.0541341	-0.0612879	0.0322409	-0.222403	0.33438	0.0148274	0.301339	0.182496	0.43389	0.241876	0.460664
ATGTGGTC	0.45182	0.422395	0.4188	0.254095	0.0567882	-0.0141582	0.420709	0.386982	0.201775	0.102699	0.332607	0.129085	0.274233	0.213725	0.394734	0.289082	0.462844	0.0708076	0.401149	0.416048	0.202038	-0.00304797	0.266872	-0.0430854	0.344875	-0.0707436	0.201358	0.312945	0.351129	0.270552	0.378108	0.271267	0.37961	0.197962	0.283753	0.112801	0.15733	-0.201323	0.294632	0.00176222	0.217734	-0.0101681	0.33109	0.119438	0.385629	0.224281	0.426222	0.319799	0.459078
GATCACAC	0.45213	0.449094	0.196595	0.0365417	0.0445764	-0.275945	0.417754	0.341216	0.0404217	-0.174958	0.393664	0.137473	0.153	0.00126234	0.308049	0.0596487	0.418796	0.272255	0.391013	0.325258	0.0357547	-0.143771	0.062865	-0.273518	0.18269	-0.00725018	0.00665056	0.145374	0.197566	-0.0163192	0.382951	0.32436	0.141141	-0.063298	0.144452	0.046485	0.0863915	-0.0901945	0.109778	0.112311	0.125197	-0.140782	0.260542	-0.093439	0.231658	0.00784507	0.42805	0.314027	0.451951
GTGACCAC	0.45632	0.473132	0.18038	0.277136	-0.071721	0.0110398	0.450375	0.441531	-0.0997527	-0.0516002	0.156491	0.191575	-0.0441354	0.190691	0.108429	0.214364	0.350561	0.225024	0.120208	0.343046	-0.159176	0.00707945	0.0227434	0.139578	0.0142112	0.0866227	0.13437	-0.116115	-0.023267	0.164681	0.41652	0.446607	0.0259916	0.172096	0.133741	0.202349	-0.0771838	0.0841384	-0.05622	0.223432	-0.117914	0.201666	0.188114	0.202698	0.0723547	0.201428	0.276791	0.23819	0.467739
CGTGACCA	0.461659	0.465214	0.215437	0.147819	-0.00598806	-0.200174	0.290923	0.125868	-0.0393583	0.00847185	0.349171	0.299291	0.247857	0.319847	0.285154	0.335214	0.392799	0.208945	0.304364	0.427828	0.154718	0.11351	0.0333253	0.192039	0.377211	0.0676347	0.374185	0.163733	0.159502	0.0745326	0.400396	0.40757	0.100057	0.113284	0.176888	0.220672	-0.00347315	-0.0294757	-0.0328353	0.0835137	0.0305057	-0.0396907	0.226814	0.0412622	0.198889	0.285795	0.317015	0.415177	0.449407
TGACCACA	0.461636	0.450869	0.11941	0.259333	0.025044	0.112357	0.196769	0.221061	-0.0103669	0.135414	0.3094	0.395178	0.325566	0.323073	0.265677	0.33378	0.378265	0.346242	0.312239	0.415221	0.0675394	0.198299	0.016669	0.165155	0.43359	0.312131	0.374435	0.158491	0.0888878	0.166024	0.393497	0.411964	0.224243	0.18482	0.28981	0.349828	-0.0864956	0.135593	-0.264589	0.18776	0.00970125	0.0693025	0.339335	0.269343	0.192563	0.308486	0.133766	0.298504	0.454027
GACCACAA	0.461966	0.432899	0.0415531	-0.022356	0.146005	-0.104624	0.309009	0.210782	0.0411035	-0.0652723	0.296291	0.0929379	0.244946	0.198599	0.186817	-0.0580642	0.25183	0.156848	0.233785	0.0337323	-0.0806383	-0.0374493	0.0132515	0.0576717	0.0983256	0.0574377	0.0976959	0.116441	0.134786	0.100496	0.286635	0.297003	0.131903	0.0681496	-0.0164193	0.0720548	0.0713174	-0.000547301	0.0733787	0.137853	0.0779932	-0.0368483	0.190308	0.0575092	0.191648	0.139991	0.381823	0.315965	0.426819
CGTGGTCA	0.395976	0.382274	0.105084	-0.031784	0.130534	-0.127491	0.332265	0.0939738	-0.0494737	-0.00658082	0.0115399	-0.052965	0.157171	-0.0806931	0.114747	-0.108302	0.149594	-0.0534336	-0.00484434	0.0562769	-0.105061	-0.21152	-0.0119403	-0.129158	-0.0582483	0.0165633	-0.230715	-0.0115598	0.194577	0.188167	0.20666	0.272202	0.264406	0.034158	0.185254	-0.102319	-0.0184895	-0.0287522	0.0170129	-0.148017	0.222728	0.0276539	0.28773	0.107844	0.276399	0.203296	0.287859	0.311226	0.454591
GATCACGC	0.252813	0.186465	0.0967	-0.00292074	0.24138	0.182403	0.080746	0.00963096	-0.156703	0.0502359	-0.0823319	-0.0176613	-0.0607908	-0.0177761	0.0447086	-0.0153992	0.241429	-0.00522429	0.106098	0.0283779	-0.0884686	-0.2007	-0.0669209	-0.239469	0.0164834	-0.0228967	-0.122768	-0.200656	0.0984855	0.134307	0.307856	0.287044	0.22441	0.079072	0.289365	0.205871	-0.112552	-0.128735	-0.0464693	0.0396996	-0.0974281	0.0581032	0.0138086	-0.144129	0.316067	0.193553	0.412734	0.256448	0.45105
GTGATCGA	-0.186967	-0.201502	-0.0149493	0.0254454	0.0824281	0.0469522	-0.262525	-0.101278	-0.0831871	-0.00968601	0.0618782	0.00341084	0.123267	-0.112436	-0.0103611	-0.116115	0.0148712	-0.0881051	-0.124795	-0.0500167	-0.14908	-0.317005	0.104452	-0.0698217	-0.184771	-0.0426519	-0.0761402	-0.230016	-0.0178762	0.0164274	0.348002	0.369882	0.00943555	0.0327793	0.046899	-0.0235767	-0.0870046	-0.246344	-0.205552	-0.11986	-0.00342547	0.0893049	0.0535747	0.0676689	0.0127216	0.13651	0.29678	0.180532	0.454702
GATCAAGC	0.0198363	-0.214267	-0.0801819	-0.0252488	0.159492	0.0679671	-0.0343265	-0.170553	-0.0110662	-0.00528938	0.0669175	-0.0531916	0.212814	0.106804	0.0344143	-0.155596	0.0654008	-0.015838	0.00461454	0.0167471	-0.105799	-0.161439	-0.00285149	-0.0796856	-0.105306	0.0575006	-0.114206	0.0095942	0.0927491	0.147467	0.369349	0.355666	0.317186	0.220303	0.262859	0.174525	-0.00642686	-0.037434	-0.0101567	0.00286168	0.182404	0.147085	0.141446	0.0219534	0.157035	0.261385	0.3592	0.403892	0.451873
CCGATCAA	-0.0877768	-0.00130895	-0.0722109	0.0720802	-0.0618674	0.0315735	-0.00440209	-0.009802	-0.0707321	0.133635	0.0589994	0.0721915	0.180208	0.0325861	0.0627322	-0.00472594	0.166177	0.00323391	-0.0640534	-0.0681955	-0.0928192	-0.15376	-0.00347785	-0.00869596	-0.234679	-0.0026862	-0.0956406	-0.062192	0.0524098	0.0493673	0.409111	0.412917	0.400411	0.289165	0.253562	0.326763	-0.0127583	0.0231328	-0.0817391	-0.00882279	0.305368	0.380107	0.321775	0.134273	0.20645	0.325318	0.294994	0.190785	0.456579
TGATCCCA	-0.0184854	0.0143131	-0.0731371	-0.0320592	0.037885	-0.161979	0.128383	0.0913373	0.128004	-0.123657	0.00751881	-0.0263635	0.356844	0.279783	-0.0825993	-0.0733613	0.018701	0.0696683	0.0336838	0.02397	-0.102641	0.0170413	-0.037339	-0.125885	-0.0311891	-0.00421897	0.0600682	0.0327697	0.10011	0.257919	0.443448	0.451942	0.122052	0.112301	0.0817153	-0.0649756	-0.0450465	0.0417918	-0.0132653	0.0739527	-0.0301748	-0.144977	0.144019	0.0562642	0.138142	0.236166	0.383987	0.379207	0.482329
CCTGATCA	0.0369766	0.0906818	0.0104224	-0.105998	0.015415	-0.273049	-0.026441	-0.00746301	-0.0375824	0.0658056	0.0550462	-0.0628725	0.0929826	0.128819	-0.0688942	0.0371639	0.105585	0.0501983	0.110395	-0.00176948	0.0127902	-0.133442	-0.0441026	0.177374	0.0529324	0.0844246	0.0506632	-0.026679	-0.0559806	-0.0715673	0.427278	0.44937	0.0330146	-0.0202476	0.216044	0.158176	0.0848704	-0.0191377	0.0121012	0.177132	-0.139254	-0.20048	0.0185007	0.0852135	0.349101	0.301618	0.36079	0.403334	0.459525
GTTGACCA	-0.0153689	0.190353	-0.217522	0.111987	0.235886	0.307389	-0.0152608	-0.0807622	-0.0671606	-0.0074935	-0.0397955	0.0433295	0.0434144	0.100578	-0.0512843	0.090952	-0.248413	-0.0949118	-0.150446	-0.0739602	-0.177989	-0.0984619	-0.251286	0.152678	-0.227654	0.130627	0.0903854	-0.0622239	-0.0598665	0.192891	0.432095	0.452642	-0.0964522	0.105567	0.174124	0.0262708	-0.125493	0.0883457	-0.161618	0.159222	-0.0791346	0.0478419	0.174882	0.117346	0.220535	0.337218	0.206349	0.302368	0.42724
CTTGACCA	0.0681292	-0.120204	0.224221	0.0339358	0.161047	0.108943	0.0740327	0.0261255	0.335935	0.121209	0.20248	-0.148149	0.0536434	-0.0182326	0.140512	-0.00325569	0.135526	0.079382	0.157156	-0.0753913	0.151907	-0.0193875	0.22918	0.0521203	0.233091	0.11304	0.00159663	0.320433	0.182262	-0.0865326	0.412551	0.457401	0.39535	0.306392	0.36993	0.356339	0.102975	-0.312726	0.232137	-0.164782	0.338369	0.418016	0.110709	0.145891	0.248152	0.177756	0.319563	-0.00486542	0.417231
AAATTGAT	-0.119997	-0.175449	0.117457	0.00741506	-0.0734989	0.114313	-0.242251	-0.101011	-0.0780539	-0.000435823	0.104969	-0.0210296	-0.0234355	-0.0905987	0.017501	-0.075821	-0.00601349	-0.12233	0.0818813	-0.140012	-0.173283	-0.210292	0.0565628	0.0361556	-0.00316562	0.028604	-0.0970507	-0.0183605	-0.018964	0.104562	0.413952	0.45379	0.158717	0.211368	0.358318	0.314015	-0.188941	-0.0742804	-0.0619055	-0.0345837	-0.0763571	0.104774	0.19497	0.195736	0.31104	0.336151	0.213435	0.214794	0.395552
ATTGGTCG	-0.0103825	-0.0658975	0.082328	0.0439348	0.131572	0.190509	-0.173049	0.188552	0.0774438	0.122188	-0.0470361	-0.0395096	-0.101457	0.168663	-0.0314736	-0.0286612	0.157881	0.0952491	-0.0488054	-0.0832113	-0.0949597	-0.0378301	0.0940415	0.124336	-0.0459734	0.130634	0.145179	0.105118	-0.16968	0.0742543	0.420215	0.45195	0.152353	0.219901	0.180271	0.285355	-0.179048	-0.0640616	0.080695	0.0844722	0.161123	0.124915	0.102479	0.140549	0.0931702	0.246756	0.0795391	0.150971	0.354143
ACCAATTC	0.0756886	0.164167	-0.000763871	0.0846478	0.0137203	0.126522	0.0427935	0.17112	0.0663542	0.0265992	0.0186481	0.102516	-0.00944745	0.0541864	0.0962877	0.126772	0.0495909	0.0361489	0.010909	0.127168	-0.109474	-0.0430805	0.00449625	0.174067	-0.0675919	0.204176	0.12073	0.0832086	-0.0187777	0.168205	0.445684	0.452574	0.102721	0.165946	0.114755	0.326175	-0.134679	0.00228789	0.0363104	0.109261	0.212089	0.249982	0.161269	0.253703	0.227102	0.214828	0.16396	0.258679	0.311928
ACCAATCG	-0.124565	0.109786	0.0334131	0.028407	-0.0494488	0.0469506	-0.0499645	0.0922065	0.135781	0.0254364	0.0687394	0.169679	-0.0244309	0.0313627	0.110409	0.110102	0.0470902	0.19134	0.0320978	0.143547	-0.0754243	0.0855231	0.06163	0.213771	-0.101144	0.223087	0.091285	0.0451647	-0.113668	0.0763237	0.446325	0.456569	0.175213	0.349995	0.289245	0.318943	-0.112784	-0.0542994	0.07791	-0.0511397	0.105687	0.269532	0.0853638	0.29641	0.113997	0.227973	0.0231258	0.239248	0.343939
AAATTGGT	-0.115304	0.00855353	0.0682087	0.0563691	0.0227216	0.0149336	-0.170333	-0.12993	0.00109475	-0.104576	-0.0151736	0.0670368	-0.0728358	0.0949997	-0.161979	0.0320488	0.00569578	0.142205	-0.168403	0.0434172	0.0862888	0.0458105	0.116007	0.164209	-0.0348986	0.0291875	-0.0811364	0.0179009	0.145863	0.163746	0.444457	0.45528	0.41272	0.348161	0.311994	0.34425	0.0754432	0.232604	0.100074	0.013256	0.218672	0.18705	0.173352	0.21358	0.174945	0.232959	0.130184	0.019093	0.287495
GTTCAAAA	0.0653316	-0.0193003	0.213132	0.137671	0.0752657	0.147332	0.0493527	0.0402002	0.14603	0.121819	0.109218	0.044669	0.252625	0.218696	0.214103	0.163241	0.134966	0.0633374	0.25813	-0.00822966	-0.0367433	0.0980097	0.183929	0.187464	0.0563856	0.081567	0.133859	0.0955846	0.0998147	0.0923176	0.448235	0.454362	0.345887	0.358263	0.355752	0.331703	0.113302	0.132807	0.00280859	0.0154446	0.299466	0.325026	0.29089	0.29631	0.231201	0.239843	0.207384	0.242318	0.364771
ACCAAAAA	0.075275	-0.0999588	-0.121112	0.0682548	0.0564303	-0.0663374	-0.0617335	-0.122695	-0.0802312	0.135519	-0.0635672	-0.0570224	0.102645	0.0962219	-0.0178077	-0.00872961	-0.0326858	-0.0276241	-0.142713	-0.0107667	-0.259517	-0.208991	-0.128483	-0.0932959	-0.206349	-0.0493014	-0.111182	-0.05969	-0.161798	-0.0470565	0.450153	0.44703	0.195557	-0.0609083	0.249534	0.183143	-0.140894	-0.169037	-0.0906491	-0.146092	0.125699	0.0299842	0.341306	0.187645	0.260166	0.204845	0.0711057	0.135162	0.387929
ATTGGTCC	-0.152578	-0.274473	-0.0902989	-0.162525	-0.0189454	-0.223284	9.27097e-05	-0.236351	-0.0904716	-0.0506621	-0.183268	-0.290658	-0.144491	-0.0778012	-0.0340983	-0.175449	-0.184771	-0.179048	-0.101818	-0.0774807	-0.184164	-0.355284	-0.0907455	-0.0543841	-0.236151	-0.106601	-0.261261	-0.0843175	-0.153611	-0.155752	0.461192	0.447423	0.119757	-0.04898	0.181248	0.0250766	-0.0191215	-0.110237	-0.152871	-0.00561737	-0.00875675	-0.0018465	0.348536	-0.00244506	0.288545	0.158719	0.0686927	-0.0483445	0.41056
TGGACCAA	0.233797	-0.0221107	-0.17986	-0.01392	-0.156543	-0.0631522	0.0836539	-0.0129744	0.0428242	-0.116494	0.0336036	0.0101042	0.270589	0.29142	-0.202182	-0.0568945	-0.0995322	-0.100218	-0.183268	0.0155754	-0.210292	-0.209366	-0.093194	-0.051337	-0.140121	-0.0252937	-0.0441278	0.0693212	0.0330995	0.101066	0.453011	0.439453	-0.14828	-0.0470336	-0.120761	-0.0434967	-0.0820842	-0.005489	-0.0422425	-0.0106562	-0.175696	-0.157187	-0.0355238	-0.011337	0.0830087	0.164805	0.213423	0.254632	0.428627
[truncated: 595 more rows]
[truncated: 5 more columns]

## Sheet: top-heatmap
Figure 4- Source data 1: Table of the pullout (top) showing average (ME and HK) E-score of the union of the top ten highly scoring 8-mers bound by atleast one NHR within the selected motif cluster
[truncated: 52 more rows]

[truncated: 1 more sheets: bottom-heatmap]
