# Supplementary material for: Mapping and analysis of Caenorhabditis elegans transcription factor sequence specificities
Source: eLife. 2015 Apr 23;4:e06967. doi: 10.7554/eLife.06967 (PMC4434323; doi:10.7554/eLife.06967)
Supplement: Figure 6—source data 1. — DOI: http://dx.doi.org/10.7554/eLife.06967.019 [file elife06967s004.xlsx]

## Sheet: T-box
Figure 6- Source data 1: Table showing 8-mers bound by atleast one T-box TF with an E-score >=0.45 for all the C. elegans TFs along with selected T-boxes from mouse and a protist that have been analyzed by PBMs
	Cobra_ME	Cobra_HK	Eomes_ME	Eomes_HK	Tbx3_ME	Tbx3_HK	tbx43_HK	tbx43_ME	tbx38_HK	tbx38_ME	tbx39_HK	tbx39_ME	tbx40_HK	tbx40_ME	tbx33_HK	tbx33_ME
GACACCCC	0.35393	0.385198	0.39498	0.33549	0.451622	0.278053	0.336976	0.418835	0.212711	0.104337	-0.365561	-0.400436	-0.429243	-0.374473	-0.104818	-0.0640664
CACCTTTA	0.314556	0.38638	0.38425	0.40117	0.452296	0.392338	0.327569	0.330686	0.344211	0.293923	0.203239	0.0565412	0.174988	0.114601	0.179616	0.0897506
CAACACCC	0.21452	0.254877	0.34996	0.41766	0.452208	0.427035	0.330281	0.367804	0.145101	0.0740329	-0.243771	0.0161901	-0.100087	-0.0743768	0.108016	0.116236
GGTGTCGA	0.337925	0.336091	0.41976	0.39974	0.463457	0.419247	0.405285	0.390653	0.264097	0.0159677	-0.118177	-0.221112	0.0225669	-0.215243	0.200457	0.003666
CGACACCC	0.316704	0.288989	0.43884	0.3505	0.473106	0.442367	0.300908	0.390509	0.0488602	-0.012098	-0.29914	-0.410791	-0.195468	-0.325885	0.0770098	-0.0740765
CCGACACC	0.280352	0.34231	0.43613	0.39912	0.465551	0.453671	0.273199	0.283954	-0.0435093	-0.197469	-0.347886	-0.338195	-0.293181	-0.313312	-0.0751448	-0.113668
AGGTGTCC	0.0976993	0.119772	0.41679	0.40069	0.456182	0.392575	0.153218	0.146152	-0.131605	-0.191721	-0.191009	-0.202273	-0.148545	-0.323284	0.138373	-0.168403
ACGTGTCG	-0.0290482	0.303716	0.42559	0.36377	0.458933	0.376452	-0.0816559	0.17681	-0.37986	-0.011221	-0.274232	-0.0542721	-0.191721	-0.00699786	0.00520499	-0.00343069
AAGTGTTG	0.232953	0.293573	0.43268	0.41313	0.457526	0.39013	0.335574	0.333007	0.30751	0.142185	0.217476	0.248966	0.259506	0.152441	0.104822	-0.0987492
GCAACACC	0.241401	0.228241	0.4283	0.43519	0.451458	0.401252	0.238463	0.229435	0.0658518	-0.0548065	0.00340064	-0.0737058	-0.0285782	-0.131515	0.0866295	-0.0318157
AGGGTGTC	0.190658	0.295342	0.46662	0.39152	0.450608	0.38826	0.278335	0.297975	0.0560229	0.0252485	-0.303716	-0.191009	-0.26216	-0.183565	0.0502183	-0.028838
GCGACACC	0.285447	0.333167	0.46894	0.41828	0.481616	0.398601	0.250738	0.361287	-0.118709	-0.145717	-0.291009	-0.230715	-0.281248	-0.212843	0.0267782	-0.15867
ACACCTGC	0.379082	0.389915	0.46913	0.42804	0.453405	0.412683	0.280615	0.354352	0.297029	0.0722134	-0.0761497	-0.294692	-0.0408075	-0.321753	0.0199115	-0.0822657
ACACCTGT	0.379962	0.399031	0.45407	0.4562	0.457773	0.427291	0.400037	0.30892	0.204655	0.263855	-0.291009	0.0242761	-0.272354	-0.0912279	-0.143415	0.133218
GGTGACAC	0.447414	0.440636	0.46002	0.45542	0.454719	0.421371	0.425041	0.406824	0.370639	0.310571	-0.0877565	-0.0528477	-0.0579206	-0.0711476	-0.0510214	0.100121
ACACCTAA	0.436616	0.404844	0.45558	0.4581	0.46181	0.465882	0.39447	0.401016	0.3394	0.296055	0.0330758	0.249446	0.121018	0.245741	0.0245014	0.0722121
AGGTGTGG	0.364928	0.379531	0.45768	0.45913	0.47096	0.456055	0.413953	0.343737	0.293907	0.253804	-0.146092	-0.138195	-0.0597484	-0.144612	0.246732	0.179872
CAGGTGTC	0.378648	0.406158	0.43986	0.4552	0.471549	0.452246	0.377365	0.33974	0.24421	0.0637441	-0.250446	-0.152578	-0.197469	-0.161439	0.0321285	-0.0918509
AAACACCT	0.298785	0.313752	0.44721	0.44962	0.470395	0.473094	0.383547	0.337749	0.218319	0.0682812	0.198382	0.0588395	0.135774	0.00621648	0.080928	0.123604
CCAACACC	0.307219	0.295761	0.42938	0.43629	0.421288	0.465565	0.33558	0.351804	0.245998	0.0291169	-0.0494786	-0.0342389	-0.104672	-0.0535415	0.114121	0.0399096
AGACACCT	0.256163	0.312449	0.43478	0.44954	0.466174	0.44815	0.379124	0.272122	0.200509	-0.00713241	-0.00309995	-0.107007	0.095022	0.0641123	-0.163451	-0.0232915
GGTGTTGA	0.332953	0.388199	0.36548	0.44633	0.469227	0.426007	0.4151	0.444945	0.346214	0.33951	0.0965285	0.154837	0.198662	0.0625499	0.134665	0.230915
CACCTTTC	0.404379	0.411798	0.43865	0.41273	0.458421	0.420749	0.370528	0.424139	0.302612	0.367223	-0.0051388	-0.0111501	-0.124718	-0.0182368	0.128636	0.19713
AACACTTA	0.406008	0.408073	0.41475	0.42075	0.456114	0.435333	0.35247	0.379601	0.349133	0.327676	0.323926	0.218312	0.392776	0.260022	0.0224032	0.0957855
ACACACCT	0.329353	0.326967	0.42344	0.453	0.457689	0.388883	0.283148	0.369632	0.184241	0.136863	-0.111295	-0.0244577	-0.0742151	-0.0629796	0.0165482	0.12828
ACACGTGT	0.0802414	0.381696	0.4	0.44591	0.456039	0.277083	0.0840341	0.292559	-0.0719791	0.239971	-0.337263	-0.122257	-0.244977	-0.00555993	0.00853184	0.241892
AGGCGTTA	0.364034	0.425495	0.4167	0.45996	0.444272	0.31723	0.171683	0.225142	0.0613987	0.0443067	0.0460054	-0.0299029	-0.019949	-0.0338777	-0.0543327	-0.108619
AGTGTTAT	0.376376	0.404386	0.42786	0.45695	0.384079	0.354631	0.389982	0.380543	0.400572	0.39132	0.194748	0.281067	0.180822	0.2114	-0.0976933	0.0472491
CATAACAC	0.416586	0.403059	0.41445	0.45309	0.385408	0.382125	0.407607	0.341376	0.385254	0.159875	0.207534	0.0456558	0.196873	-0.0481557	0.126041	-0.0943667
CTTTCACA	0.418536	0.418752	0.42544	0.45917	0.279715	0.33165	0.396092	0.329895	0.309901	0.261446	0.00569163	-0.0981524	-0.0898064	0.0550149	0.124913	0.274697
GGTAACAC	0.419669	0.42227	0.43169	0.4537	0.409506	0.284819	0.270023	0.280604	0.404014	0.285705	-0.0941802	-0.0129865	-0.123284	-0.0993654	0.0380598	-0.075872
GTGAGAAC	0.441724	0.439776	0.42551	0.45851	0.371137	0.409217	0.427526	0.301241	0.456918	0.362499	0.153651	-0.11549	0.0561002	0.0591359	0.276946	0.113061
AGTGAGAA	0.433114	0.431414	0.40977	0.45569	0.284011	0.196637	0.396283	0.293067	0.467128	0.394254	0.0686226	-0.164397	-0.0363561	-0.0142678	0.186865	0.0777984
AAGTGAGA	0.414609	0.428927	0.41721	0.45225	0.298831	0.00733341	0.338804	0.362221	0.455376	0.409149	0.142264	0.141436	-0.0748449	0.131623	0.119916	0.224512
GGGTGAGA	0.442401	0.400077	0.42048	0.41567	0.188193	0.198012	0.361644	0.332095	0.452626	0.370184	-0.0754611	-0.391364	-0.00342838	-0.305651	-0.0249958	0.011477
AGTGCGAT	0.328337	0.326895	0.38308	0.40813	0.179345	0.21965	0.311627	0.237579	0.45516	0.406631	0.136417	0.144015	0.0949081	0.147833	0.069935	0.176081
ATTAGCAC	0.38076	0.315519	0.33975	0.37565	0.211725	0.340022	0.412712	0.326444	0.471076	0.41405	0.23439	0.228847	0.310924	0.118741	0.166583	-0.0401319
ACTCGCAC	0.227684	0.291635	0.30773	0.29545	0.268146	0.182335	0.206867	0.210302	0.468933	0.388612	0.0581612	-0.0258437	0.0632209	0.0983816	0.0206846	-0.0223955
TAGTGCGA	0.304664	0.340957	0.33109	0.34795	0.271656	0.139082	0.306194	0.245526	0.451379	0.42476	0.142738	0.106709	0.206231	0.11801	0.157532	0.0804614
GAGTGCGA	0.315335	0.344264	0.41681	0.36465	0.224356	-0.00654561	0.251182	0.279597	0.457802	0.416592	-0.0454742	0.0426322	-0.118575	0.117866	-0.068919	0.0400457
TCGCACCA	0.28075	0.359971	0.41637	0.41363	0.160247	0.211321	0.341426	0.309728	0.458434	0.370646	-0.0303914	-0.202	0.0622165	-0.26216	0.0112454	-0.141454
CTCGCACC	0.394855	0.415193	0.4198	0.43702	0.301722	0.342809	0.363912	0.391049	0.467747	0.424474	-0.15544	-0.0791833	-0.112148	-0.170553	-0.0467192	-0.0228998
ACTCACAC	0.40265	0.453671	0.41307	0.4415	0.390327	0.322034	0.305017	0.361449	0.467293	0.443758	-0.0273621	-0.121896	-0.12321	-0.00479359	0.0486206	-0.0287163
ATCGCACC	0.426063	0.428629	0.45324	0.44668	0.372519	0.217749	0.418516	0.400571	0.475825	0.42499	-0.217718	-0.0797986	-0.112784	-0.121896	0.0996613	0.0602936
AAGTGCGA	0.439645	0.433036	0.46496	0.47247	0.350417	0.340347	0.390127	0.372848	0.478819	0.457362	0.065014	0.0849305	0.0216429	0.086374	-0.11986	-0.0081282
AGTGCGAA	0.432991	0.439818	0.46178	0.46246	0.346844	0.22379	0.397482	0.365228	0.485126	0.469604	0.074092	0.168793	-0.00802453	0.105927	-0.0977229	-0.0706938
GTGCGAAC	0.433476	0.427718	0.45464	0.46396	0.400953	0.287824	0.417066	0.403406	0.484828	0.472209	0.162751	0.0161137	0.124691	0.0516614	0.0458434	-0.0278107
GGGTGCGA	0.427492	0.439131	0.44877	0.46045	0.390776	0.294886	0.426726	0.448368	0.486204	0.483374	-0.29393	-0.103433	-0.27986	-0.155909	0.158572	0.0268781
ATTCGCAC	0.434752	0.419265	0.47158	0.44629	0.356501	0.36181	0.447905	0.388432	0.491956	0.485414	0.18507	-0.115927	0.0989314	-0.0810557	0.0158515	-0.200833
GGTGATAA	0.442895	0.438829	0.41034	0.40806	0.262701	0.385337	0.479675	0.433038	0.479574	0.463945	-0.178516	0.0962779	-0.129757	0.0735127	0.287535	0.242809
TAGTGTGA	0.460097	0.461605	0.45263	0.45731	0.361128	0.408355	0.470917	0.414375	0.488377	0.441074	0.122035	-0.149757	0.0658518	-0.012868	0.342345	0.13598
AGTCACAC	0.470516	0.463811	0.44546	0.46082	0.412002	0.391216	0.375035	0.426843	0.484844	0.454841	0.0595982	-0.135556	-0.0139354	-0.104915	-0.0279191	0.165364
AGTGTGAG	0.427323	0.460918	0.44982	0.44324	0.383807	0.31666	0.375233	0.408723	0.46763	0.457723	0.0162143	-0.0718842	-0.0498368	-0.076479	-0.0235089	0.199941
ATTCTCAC	0.434047	0.450344	0.41189	0.42733	0.355351	0.156122	0.3916	0.420736	0.441572	0.467911	-0.0403772	-0.135262	-0.0030347	0.0323663	0.159156	0.19342
GGTGCTAA	0.429894	0.45911	0.43424	0.45022	0.403925	0.269745	0.446798	0.430267	0.466696	0.461747	0.191934	0.418107	0.31808	0.392045	-0.0353182	-0.0650105
AGTAACAC	0.437809	0.453098	0.43403	0.43528	0.451209	0.342847	0.419538	0.42655	0.452731	0.441284	0.253638	0.247734	0.176973	0.213276	0.188264	0.0961632
TAACACCA	0.445502	0.449141	0.45541	0.45468	0.422194	0.443627	0.445883	0.459906	0.465853	0.432846	0.0822737	0.112636	0.0522244	-0.025129	0.135236	-0.0210117
ATTAACAC	0.439692	0.468015	0.45798	0.44586	0.447072	0.346822	0.440263	0.462393	0.478287	0.460984	0.249741	0.179659	0.21606	0.258439	0.0997524	0.200357
AGTGTTAA	0.444388	0.468056	0.45488	0.46443	0.439314	0.315289	0.422752	0.463602	0.47085	0.44892	0.0111641	0.192156	0.0807984	0.197096	0.048138	0.0386486
AATCACAC	0.455245	0.472658	0.46817	0.46934	0.414622	0.416098	0.413374	0.455178	0.475773	0.475027	0.0728882	0.0811922	0.119985	0.164071	0.192767	0.0912135
GTGCGAAA	0.453753	0.476828	0.47209	0.48151	0.413571	0.155146	0.391661	0.441609	0.443519	0.438701	0.0481062	-0.151999	0.00286054	0.04944	0.0319925	-0.0350893
AGTGTGAT	0.470188	0.465952	0.46552	0.47691	0.393623	0.375126	0.38406	0.38539	0.460318	0.415928	0.249135	-0.160555	0.248179	-0.0803838	0.254449	0.0602536
AGTGTGAC	0.464185	0.463114	0.46014	0.4617	0.438144	0.40531	0.369647	0.369319	0.465916	0.418859	0.0796238	-0.0533083	0.151724	-0.0778601	0.238758	0.177589
TGTGTGAA	0.487698	0.481188	0.47868	0.47634	0.43692	0.449492	0.457881	0.429071	0.468685	0.404183	0.154619	-0.0160416	0.0902514	0.115011	0.214256	0.195378
ACGTGTGA	0.486888	0.486422	0.47409	0.48311	0.473362	0.460192	0.410544	0.452447	0.441691	0.436214	0.143484	-0.194692	0.0476386	-0.073934	-0.0196109	0.119483
GGTGTTAC	0.468652	0.469884	0.48377	0.472	0.460865	0.447992	0.45498	0.44409	0.467416	0.417505	-0.0242791	0.0580019	-0.0167013	-0.14023	0.0625929	-0.0397044
CTAACACC	0.462918	0.457329	0.47262	0.47227	0.463024	0.485884	0.468167	0.463273	0.477475	0.452967	0.0263418	-0.102872	0.0852032	-0.178781	0.114166	0.0850813
GGGTGTTA	0.479635	0.466808	0.48016	0.48069	0.465093	0.46248	0.479302	0.474308	0.48084	0.469544	-0.156864	-0.0548915	-0.0275247	-0.0779272	-0.133819	-0.0261737
CTCACACC	0.477589	0.482261	0.46744	0.48341	0.46771	0.459652	0.466025	0.449638	0.481756	0.464302	-0.125571	-0.236856	-0.144733	-0.0840343	0.0475007	0.0600686
GAGTGTGA	0.47577	0.483951	0.47604	0.47643	0.439439	0.378598	0.448702	0.443088	0.486643	0.482271	0.0202178	-0.22652	0.00465611	-0.120621	0.347567	0.182229
TCACACCA	0.476878	0.479791	0.48675	0.4851	0.457636	0.403816	0.470094	0.471462	0.484265	0.471794	-0.0498504	-0.00878173	-0.0307647	-0.0172946	0.341361	0.164386
AGGTGCTA	0.469333	0.472255	0.46036	0.48623	0.466144	0.377417	0.466363	0.483069	0.472159	0.481422	0.0472608	0.282302	0.205631	0.256745	0.00608874	0.0636047
AAGTGTTA	0.464827	0.48557	0.47745	0.47474	0.475776	0.458675	0.462806	0.480334	0.477305	0.472134	0.220991	0.151255	0.220078	0.194103	0.0184468	0.0739753
GGTGCGAA	0.472595	0.483188	0.4846	0.48487	0.454908	0.383415	0.478003	0.482939	0.494008	0.493394	-0.0419131	-0.108672	-0.0665158	-0.101323	-0.150031	-0.129757
GTGTGAAC	0.492917	0.494587	0.48865	0.48974	0.48605	0.440147	0.480438	0.48956	0.490365	0.493753	0.037397	-0.121824	-0.0328597	0.0530458	0.232102	0.190406
ATTCACAC	0.490263	0.488985	0.48373	0.47797	0.47985	0.469046	0.491989	0.486881	0.494496	0.49377	0.289991	-0.0376628	0.206891	0.185779	0.26395	0.25031
GGTGTTAA	0.483598	0.488886	0.48683	0.48778	0.477524	0.481949	0.492268	0.49149	0.489877	0.486989	-0.00566489	-0.19431	0.0104002	-0.166354	-0.188941	-0.0588995
ATCACACC	0.48878	0.489451	0.49005	0.48007	0.474645	0.479478	0.486663	0.484577	0.487332	0.467255	0.0629524	-0.0448335	0.147526	-0.0357994	0.269588	0.0393615
GGTGTCAA	0.489906	0.48357	0.48113	0.47108	0.487502	0.485256	0.496095	0.494739	0.474849	0.433953	-0.101368	0.00641205	-0.173049	0.0109552	0.115987	0.139583
AGGTGTCA	0.495104	0.494552	0.48859	0.49045	0.495508	0.495912	0.497366	0.497327	0.476196	0.452999	-0.224489	-0.0124068	-0.243297	-0.115989	0.0383181	0.0316212
AGGTGTTA	0.495282	0.497417	0.49554	0.49548	0.495049	0.49694	0.49739	0.497132	0.494123	0.493027	0.202369	-0.00699521	0.173686	-0.107109	0.118951	0.0946741
AGGTGTGA	0.499399	0.499233	0.49739	0.49405	0.4957	0.497489	0.498946	0.498983	0.497933	0.498678	0.102558	-0.10278	0.0175785	-0.0153386	0.0967198	0.153801
GGTGTGAA	0.497609	0.498832	0.49742	0.49635	0.492884	0.477008	0.498654	0.498762	0.495945	0.498216	-0.0917355	-0.134294	-0.160206	0.010323	0.341409	0.312761
AGTGTGAA	0.49491	0.494879	0.48729	0.48534	0.477645	0.487449	0.495325	0.492053	0.497475	0.494687	0.101977	-0.0418753	-0.0585528	0.070984	0.400321	0.325433
GTGTGAAA	0.496213	0.496421	0.49172	0.49086	0.482299	0.474065	0.493869	0.49377	0.487034	0.478556	-0.0647964	-0.178252	-0.229585	-0.134969	0.314938	0.197935
GGGTGTGA	0.493732	0.492228	0.49569	0.49243	0.478167	0.476238	0.493021	0.486018	0.494747	0.479963	-0.122113	-0.336552	-0.0844713	-0.288606	0.387778	0.214329
AAGTGTGA	0.493807	0.491984	0.4907	0.48452	0.476805	0.487554	0.478097	0.475905	0.494231	0.493381	0.1829	0.156746	0.0657263	0.108606	0.0403424	0.235214
AGGTGCGA	0.494873	0.48762	0.49297	0.49487	0.469842	0.483703	0.488286	0.472009	0.490529	0.490275	0.008661	-0.101863	0.0457618	-0.131158	-0.203198	-0.105208
CTTCACAC	0.493214	0.488383	0.48787	0.48256	0.471563	0.465574	0.485037	0.472493	0.484527	0.447226	-0.0869866	-0.0427123	-0.165365	0.148915	0.33513	0.311856
ATGTGTGA	0.492073	0.486852	0.4874	0.4832	0.468646	0.452751	0.471338	0.474283	0.469428	0.448519	0.202631	0.117027	0.0196864	0.170795	0.240903	0.282259
GGTGTGAC	0.489472	0.48666	0.48875	0.48612	0.465403	0.436947	0.460509	0.472824	0.480964	0.471778	-0.104964	-0.234582	-0.151145	-0.192812	0.257804	0.261563
AGGTGAGA	0.478198	0.485225	0.48802	0.48435	0.453056	0.395594	0.458719	0.46641	0.480704	0.472204	0.0371527	-0.0655527	0.00452823	-0.0309506	0.203911	0.0385863
ATAACACC	0.471714	0.473899	0.47837	0.47982	0.465072	0.438705	0.469379	0.471611	0.469463	0.462071	0.117947	0.159931	0.111606	0.154116	0.0202124	0.0674284
GGTGAGAA	0.478944	0.476758	0.46493	0.47658	0.412527	0.400647	0.46221	0.470999	0.477434	0.468931	-0.11261	-0.114509	-0.156225	-0.106651	0.0995416	0.206437
AGGTGATA	0.465555	0.476561	0.46477	0.45464	0.427683	0.417926	0.451984	0.468454	0.472463	0.471888	-0.0238516	0.112012	0.0875076	0.0526739	0.178746	0.212697
GTGTTAAC	0.469571	0.483197	0.45925	0.46117	0.467134	0.384519	0.450165	0.482417	0.455823	0.439505	0.197881	0.0850403	0.156948	0.0241745	0.238617	-0.065951
GTGTTAAA	0.457693	0.474626	0.46217	0.46713	0.450883	0.391362	0.463319	0.472779	0.451014	0.397155	-0.0914039	0.0301873	-0.0653633	0.00410273	-0.0387269	0.0425613
AGGTGACA	0.478911	0.478304	0.47629	0.47789	0.469343	0.417523	0.471481	0.475126	0.437175	0.409134	-0.116494	0.00639358	-0.116877	0.157309	0.242138	0.146754
GGGTGTCA	0.477106	0.466272	0.47002	0.46997	0.477984	0.45724	0.478948	0.488055	0.401362	0.399147	-0.192445	-0.297469	-0.196257	-0.125026	0.145316	0.0160671
AGGTGTAA	0.486181	0.48012	0.47327	0.48155	0.476	0.414387	0.469455	0.467414	0.413202	0.403668	-0.0205696	0.16412	-0.0810302	0.179517	0.0477179	0.185097
GGTGTCAC	0.466184	0.467551	0.46318	0.47625	0.470142	0.442899	0.452586	0.467919	0.356366	0.275953	-0.11261	-0.155284	-0.185078	-0.221968	0.0480012	-0.0651561
ATGTGTCA	0.46224	0.467617	0.4564	0.46461	0.46515	0.374887	0.445219	0.466242	0.329887	0.226621	0.271091	0.0954659	0.252233	0.0498968	0.283554	0.186321
AGTGTCAA	0.439016	0.468327	0.45453	0.46179	0.46416	0.34495	0.454039	0.481783	0.365485	0.401694	-0.00581161	0.0876871	-0.0839889	0.201997	0.00175383	0.155412
GTGTCAAA	0.458979	0.479542	0.45245	0.45712	0.475108	0.390218	0.466786	0.488383	0.330923	0.295005	0.147993	-0.0552876	0.077545	-0.0713016	0.0620315	0.0818459
ATGACACC	0.448527	0.471168	0.45678	0.45842	0.44514	0.435649	0.468801	0.472513	0.324775	0.263471	-0.301278	-0.0467544	-0.216241	-0.0747917	-0.036128	-0.0319366
GGTGTAAA	0.464079	0.474995	0.4373	0.45231	0.452665	0.417851	0.452878	0.469802	0.365843	0.332505	0.0395997	-0.0782014	0.0380332	-0.049223	-0.0157828	0.282802
CTTGACAC	0.45643	0.452875	0.41479	0.44366	0.437556	0.455902	0.449388	0.454637	0.299672	0.277083	0.0783392	0.0575013	0.101223	0.157418	-0.077802	-0.0809733
ATTGACAC	0.442833	0.459886	0.41554	0.39907	0.445006	0.40756	0.475593	0.464755	0.421073	0.354924	0.251757	0.0269638	0.177325	0.0175367	0.297001	0.2108
TGACACCA	0.439906	0.449594	0.43919	0.43732	0.433375	0.409599	0.472312	0.462907	0.31721	0.243277	-0.0642199	0.0621432	-0.156067	-0.0796187	0.0155571	0.00358802
GGTGACAA	0.446571	0.454809	0.45013	0.45659	0.437266	0.374357	0.46935	0.474384	0.437353	0.420067	-0.0428232	0.0135967	-0.0835353	0.163958	0.426974	0.287589
GTGTCAAC	0.456598	0.446595	0.44641	0.46465	0.454336	0.42463	0.461413	0.468332	0.390913	0.247023	0.109251	-0.0954024	0.0903079	-0.107936	0.114535	0.0666076
CTGACACC	0.459246	0.448403	0.45753	0.44207	0.474652	0.443197	0.458452	0.464351	0.349875	0.213617	-0.0526313	-0.232514	-0.043163	-0.254363	0.109832	0.0155942
ACGTGTCA	0.432241	0.461841	0.458	0.46917	0.4702	0.416863	0.420215	0.42718	0.162387	0.133469	0.15131	-0.104048	0.0293388	-0.180967	0.0746779	0.00997504
ACACCTTG	0.363787	0.428375	0.45589	0.47485	0.48262	0.432504	0.322308	0.452555	0.163289	0.347998	-0.147366	0.0566223	-0.155129	0.100146	-0.0569206	0.0246299
ACACCTAT	0.388707	0.41656	0.46842	0.45833	0.479635	0.454293	0.38012	0.457258	0.222643	0.317309	0.0557238	0.228601	0.120221	0.133315	0.00138976	0.0287589
ACACCTAG	0.428328	0.449977	0.44578	0.4441	0.485429	0.454323	0.378104	0.437745	0.283657	0.341192	-0.239254	0.0336539	-0.192445	0.0805951	-0.154061	0.0658739
ACACCTCG	0.43902	0.436096	0.45731	0.45286	0.489443	0.478307	0.420587	0.430676	0.303885	0.245126	0.105652	-0.0897076	0.0479515	-0.139794	0.13752	0.0459203
ACACCTCT	0.396798	0.431605	0.47476	0.47628	0.484455	0.461675	0.405976	0.416578	0.250321	0.225173	0.0929538	0.0301876	0.0584648	0.0378147	0.0400635	0.197017
ACACCTTC	0.440114	0.427599	0.46683	0.46629	0.483278	0.465023	0.422076	0.381121	0.354287	0.283326	0.0829618	-0.131876	-0.0594114	-0.0763599	0.349348	0.252014
ACACCTTA	0.424418	0.439936	0.46777	0.45657	0.472241	0.477346	0.448681	0.408393	0.436452	0.328852	0.20095	-0.00775813	0.107324	0.0440432	0.207436	0.0149543
AACACCTG	0.448343	0.393725	0.47117	0.467	0.470142	0.484143	0.455303	0.364314	0.430448	0.26562	-0.0183635	-0.0423576	-0.0128918	-0.143415	-0.00817347	-0.00481309
ACACCTCA	0.463718	0.431398	0.47736	0.46951	0.469003	0.47572	0.461478	0.42401	0.404277	0.275835	0.0456099	-0.0413044	0.215805	-0.072563	0.215157	0.0426656
ACACCTCC	0.44165	0.428286	0.43353	0.47948	0.475589	0.464777	0.460261	0.376346	0.38258	0.169283	-0.126761	-0.223807	-0.0700308	-0.176447	0.216406	0.139397
ACACCTAC	0.422627	0.442775	0.42688	0.4688	0.48112	0.476237	0.441283	0.418385	0.39211	0.189814	0.234593	-0.0951535	0.223142	-0.0514328	0.318759	0.153794
CACACCTA	0.445318	0.434582	0.44633	0.46663	0.470527	0.474068	0.430632	0.43871	0.349863	0.380307	-0.0770374	0.168656	-0.0266645	0.155192	0.0787756	0.169913
GACACCTA	0.452895	0.448949	0.46306	0.4769	0.489828	0.485328	0.452963	0.458793	0.314675	0.132487	-0.141454	0.0101961	0.013829	0.0344108	-0.00885856	0.095521
AACACCTC	0.460891	0.437093	0.47333	0.48579	0.488243	0.492908	0.468882	0.438861	0.355994	0.260771	0.0379021	-0.0656381	0.165721	-0.179048	0.12208	0.101809
AGGTGTTG	0.446674	0.43622	0.47467	0.48553	0.490532	0.492121	0.461368	0.449011	0.367109	0.264866	0.260751	0.00716125	0.301589	0.00408056	0.225104	-0.00341391
AGGTGTCG	0.450935	0.447627	0.49047	0.48062	0.493489	0.491405	0.457551	0.480919	0.26776	-0.0163134	-0.0290176	-0.133442	0.0835933	-0.0994579	0.19725	-0.0124272
GACACCTC	0.465601	0.451385	0.48066	0.46698	0.490252	0.484657	0.445379	0.471028	0.258072	-0.0254466	-0.167985	-0.223359	-0.124949	-0.291721	-0.10804	-0.086929
AAGGTGTC	0.463161	0.441929	0.47476	0.47792	0.489395	0.483587	0.443501	0.454316	0.335279	0.253244	0.0947232	-0.088086	0.0772336	-0.0451007	0.213172	-0.0631735
AACACCTA	0.450443	0.462265	0.47042	0.46836	0.485141	0.475994	0.419048	0.466188	0.394787	0.369743	0.244314	0.097478	0.241845	0.0598332	0.113917	-0.004447
AAGGTGTG	0.379827	0.448836	0.4693	0.47785	0.485485	0.470704	0.401258	0.470256	0.340418	0.422284	-0.212843	-0.166354	-0.261083	-0.0493107	0.0298847	0.203177
AAAGGTGT	0.414525	0.455978	0.47737	0.47973	0.484725	0.470184	0.41388	0.450919	0.351382	0.37042	0.101444	-0.0627371	0.0894856	-0.0189081	0.136096	0.143293
CACACCTC	0.433793	0.432806	0.47834	0.4781	0.483103	0.470899	0.445039	0.426445	0.384044	0.386564	0.0627418	-0.130016	0.0915613	-0.0782671	0.267955	0.0837395
AACACCTT	0.438939	0.451209	0.47668	0.48441	0.483213	0.488418	0.467426	0.438668	0.42004	0.341978	0.334386	0.00291978	0.252443	0.00510714	0.298942	-0.0647166
AAGTGTCA	0.45664	0.474901	0.46568	0.4749	0.464631	0.473704	0.465095	0.440076	0.4113	0.335943	0.193884	-0.00966446	0.0780684	0.0235049	-0.07938	-0.128651
ACGTGTTA	0.448367	0.470084	0.45954	0.46602	0.465894	0.415083	0.415635	0.42191	0.400738	0.322599	0.162831	-0.185699	0.191416	-0.198297	0.061494	-0.115304
AGGCGTGA	0.475449	0.471825	0.46119	0.4754	0.461382	0.443566	0.289517	0.39958	0.279739	0.140576	-0.175696	-0.290658	-0.188941	-0.211976	-0.222915	-0.22233
CGTGTGAA	0.485606	0.484969	0.46602	0.47241	0.474364	0.430504	0.405976	0.443853	0.381687	0.338351	0.157549	-0.218111	-0.0317051	0.0314747	0.0996613	0.0492196
GTGTGACA	0.478003	0.48198	0.4749	0.47696	0.458107	0.391933	0.415155	0.442571	0.401215	0.31756	0.185716	-0.274715	0.157878	-0.22652	0.311464	0.211524
GTGTGATA	0.473438	0.477985	0.47179	0.47044	0.382926	0.420262	0.392372	0.38873	0.345751	0.312924	0.327672	-0.239794	0.291195	-0.0835406	0.207809	0.0178197
TGTGAAAA	0.473364	0.481596	0.44708	0.45182	0.409956	0.307922	0.437946	0.467998	0.340897	0.325316	-0.0837289	-0.00755016	-0.0745012	0.140553	0.405065	0.425187
ATTTCACA	0.49021	0.489729	0.43547	0.4521	0.42872	0.378893	0.437593	0.445788	0.392726	0.328489	0.183619	0.0713611	0.0431808	0.219928	0.264896	0.193175
AGTTCACA	0.477495	0.472771	0.42924	0.45033	0.420613	0.255688	0.391244	0.399048	0.297716	0.339272	0.139274	0.110993	0.0717341	0.228474	0.274339	0.278966
ACTTCACA	0.489688	0.473306	0.37947	0.42854	0.36197	0.418955	0.421564	0.369423	0.385731	0.280951	0.120715	0.172204	0.118808	0.247763	0.195737	0.307765
AATTCACA	0.479098	0.457044	0.40858	0.35644	0.350023	0.358934	0.414425	0.384994	0.364023	0.323858	0.261439	0.12898	0.166851	0.187394	0.236787	0.213729
TGTTAACA	0.46925	0.458561	0.42939	0.44692	0.411641	0.403269	0.426874	0.423766	0.410171	0.265565	0.331306	0.122331	0.232634	0.0589847	0.257304	-0.0835023
CTTAACAC	0.454635	0.459002	0.42462	0.44808	0.436074	0.41954	0.432688	0.431565	0.408382	0.353893	-0.0756208	-0.0732976	-0.0855731	0.0138524	0.0825143	-0.059993
GTGTGAGA	0.471948	0.459145	0.45012	0.45618	0.435824	0.341129	0.381029	0.421328	0.369793	0.361561	0.0071316	-0.319111	-0.125026	-0.0831535	0.0300453	0.0812227
GTGTCACA	0.458898	0.472159	0.45992	0.46772	0.464994	0.315399	0.39923	0.434311	0.261924	0.200466	0.18394	0.0807709	0.0523761	-0.0761259	0.199482	0.12649
CATCACAC	0.462684	0.468692	0.45349	0.46295	0.439256	0.364768	0.338278	0.406466	0.308541	0.351804	0.133123	-0.0636512	0.0976876	0.00424318	0.275961	0.166061
CGGTGTGA	0.454433	0.469456	0.45613	0.45104	0.41794	0.189799	0.246125	0.395747	0.379095	0.348446	-0.26925	-0.188941	-0.258503	-0.0227436	-0.0594432	0.158298
GGCGTGAA	0.441327	0.469982	0.46908	0.46755	0.452927	0.345406	0.259731	0.298627	0.113081	0.0881074	-0.230892	-0.240012	-0.2284	-0.170333	-0.23536	-0.0985723
GCGTGAAA	0.45854	0.454592	0.46486	0.4721	0.418347	0.340447	0.323747	0.299109	0.188096	-0.0230776	0.0143767	-0.201457	0.00419841	-0.0650307	-0.16038	-0.163078
GTGTTACA	0.45065	0.440551	0.46374	0.44985	0.411078	0.311125	0.28643	0.289533	0.313527	0.246136	0.350343	0.0601026	0.256772	0.13257	0.0684155	-0.0628681
AGGTGCCA	0.456702	0.453215	0.46688	0.44962	0.404153	0.370257	0.417341	0.380498	0.330306	0.170522	-0.073665	0.165267	0.0274625	0.18593	0.221898	-0.0521806
ATGTGTTA	0.463796	0.461338	0.463	0.47171	0.418225	0.385036	0.423748	0.360394	0.413809	0.322728	0.332386	0.140232	0.325735	0.0901767	0.25455	0.0468453
GTGAGAAA	0.460161	0.466243	0.43909	0.46478	0.357621	0.268525	0.43493	0.425963	0.420072	0.33435	0.127055	-0.215552	0.0521305	0.0623698	0.20956	0.121833
GATCACAC	0.455981	0.472757	0.45255	0.44998	0.408698	0.391831	0.399062	0.394238	0.457566	0.394376	0.259183	-0.147496	0.226604	-0.043838	0.230571	0.0172214
GGTCACAC	0.452619	0.462356	0.46259	0.46586	0.395146	0.327092	0.266698	0.359706	0.430986	0.39924	-0.232975	-0.107572	-0.313018	-0.0569304	-0.0766994	0.104337
ATGTGCGA	0.430442	0.432164	0.45061	0.46423	0.339629	0.231399	0.294656	0.331127	0.412779	0.348452	0.0579892	0.063434	-0.0205812	0.0276269	-0.0752908	-0.0511834
GTGTTATA	0.435286	0.434621	0.43275	0.4629	0.407422	0.378517	0.378277	0.366907	0.367185	0.358337	0.213796	0.236528	0.316611	0.276006	-0.0824529	-0.0428335
ATGTGACA	0.449953	0.460667	0.4369	0.45029	0.362697	0.287574	0.358007	0.368833	0.291492	0.105483	0.380881	0.198912	0.224074	0.0833336	0.34598	0.288999
TGTGACAA	0.451084	0.461773	0.44691	0.44696	0.381616	0.244905	0.344838	0.402234	0.279193	0.18693	0.332287	-0.0574342	0.249781	0.0974375	0.379952	0.431443
GTTTCACA	0.467078	0.444611	0.43804	0.4512	0.284722	0.309306	0.292212	0.333307	0.21358	0.240375	0.0460537	-0.145346	-0.0644957	0.0197274	0.191691	0.0917598
AGTTGTGA	0.440494	0.408332	0.45118	0.41996	0.154634	0.234376	0.365921	0.184063	0.273159	-0.143063	0.275387	0.073565	0.302657	0.0497421	0.170366	-0.0341605
ACGTGCGA	0.432498	0.423824	0.45281	0.42676	0.372818	0.161377	0.169391	0.253521	0.366193	0.343449	0.140653	-0.0541504	0.0131961	-0.0676963	0.0995708	-0.206601
AGGCGCGA	0.317476	0.405475	0.46429	0.44306	0.3525	0.292887	0.193447	0.238156	0.169022	0.0828256	-0.314388	-0.231158	-0.203858	-0.140121	-0.0301896	0.0586385
AAAAGGTG	0.125548	0.253395	0.44065	0.45481	0.331739	0.225742	0.291926	-0.00636542	0.0997513	-0.150724	-0.278516	-0.275449	-0.18962	-0.21152	-0.0969214	-0.160906
ACCTGTGA	0.333842	0.400764	0.45316	0.41164	0.123545	0.182716	0.0874787	0.21485	-0.0513419	0.0757182	-0.237366	-0.130539	-0.211862	-0.116622	-0.15157	0.0107889
GTGACACA	0.406341	0.426919	0.45195	0.43102	0.426724	0.259614	0.230758	0.34522	0.203242	0.172151	0.0337576	0.0829006	-0.0259142	-0.0234553	0.0738976	0.208765
GGGTGACA	0.409404	0.422228	0.41206	0.42621	0.405731	0.242192	0.430218	0.451626	0.412186	0.376581	-0.0866199	-0.15376	-0.128651	-0.0485103	0.195987	0.316059
GTGACAAA	0.428483	0.443599	0.41065	0.42057	0.364404	0.302997	0.387454	0.456956	0.310944	0.275563	0.26016	-0.104672	0.188243	0.0247275	0.17769	0.231059
TGTTAAAA	0.394641	0.458166	0.40921	0.41187	0.36045	0.147626	0.39455	0.462625	0.282626	0.393281	0.0471546	0.0483518	-0.0628927	0.103043	-0.0818477	0.0367695
CGTGTTAA	0.438813	0.463213	0.42653	0.42539	0.453682	0.254683	0.335303	0.42656	0.267623	0.355672	-0.0215623	0.00538403	-0.013815	0.0810912	0.00250288	-0.0218724
AGGTGCAA	0.451378	0.460246	0.44733	0.4378	0.404926	0.297368	0.31134	0.374229	0.309973	0.371934	-0.126922	0.0792018	-0.0908966	0.107156	0.0594244	0.128174
TGTGAGAA	0.435041	0.452598	0.42876	0.43053	0.330038	0.289873	0.409669	0.371312	0.383798	0.28173	-0.00338132	-0.132239	-0.0669531	0.0844958	0.252984	0.0960687
ATCACACA	0.448422	0.465883	0.41755	0.43816	0.324744	0.351317	0.337421	0.355803	0.320832	0.335718	0.318	0.117893	0.247919	0.248594	0.219671	0.101142
ATCACACG	0.411551	0.453169	0.41914	0.41089	0.362892	0.332667	0.227285	0.314344	0.230897	0.262701	0.130744	-0.286646	0.119694	-0.148149	0.169013	0.0908184
GATTTCAC	0.410411	0.455943	0.37026	0.3906	0.309173	0.221356	0.0722875	0.190806	0.0821756	0.087126	-0.00194522	-0.179588	-0.00508091	-0.0792651	-0.0428363	0.0945918
CGTGTGAC	0.429039	0.454995	0.38982	0.4179	0.425512	0.170163	0.200992	0.357132	0.166893	0.167402	-0.123359	-0.333913	-0.125104	-0.207935	-0.121042	0.0317348
ATATCACA	0.456567	0.451398	0.42288	0.4271	0.35622	0.308711	0.379013	0.305895	0.351139	0.246764	0.386181	0.0689945	0.344654	0.0952465	0.332242	0.083444
AATTTCAC	0.448927	0.451945	0.37183	0.39287	0.216045	0.224067	0.280833	0.236019	0.161494	0.104881	0.0869142	-0.0202882	0.0351109	0.119119	0.248297	0.0221565
ATGTGAAA	0.460307	0.457524	0.30934	0.39993	0.362777	0.0360277	0.248954	0.292959	0.0647541	0.260741	0.0269914	0.0565998	-0.0801458	0.254495	0.383605	0.4007
ATGTCACA	0.462284	0.443173	0.39501	0.41278	0.253589	0.334731	0.315968	0.16281	0.245842	0.140675	0.375101	0.0806735	0.30389	0.0592608	0.20164	0.0966455
ACCTCACA	0.451643	0.417582	0.34337	0.38997	0.261558	0.332156	0.287137	0.23767	0.288799	0.0993097	-0.0577665	0.0869215	0.100414	-0.0441824	0.137951	-0.039595
CATGTGAA	0.452836	0.41341	0.27221	0.29738	0.20942	0.17647	0.11289	0.0550171	0.0749465	-0.0408945	0.184197	-0.190309	0.0899389	0.018235	0.229418	0.151122
ACTTGACA	0.452743	0.408406	0.34676	0.36709	0.301077	0.363787	0.409004	0.337532	0.278015	0.190377	0.183891	0.241254	0.205038	0.216341	0.137807	0.00537198
ATGTGAAG	0.460001	0.388972	0.26038	0.29684	0.304597	0.281927	0.316699	0.247319	0.250776	0.171893	0.203352	0.163987	0.0880382	0.224998	0.419894	0.438448
CATTTCAC	0.467373	0.412115	0.30972	0.34323	0.171748	0.128669	0.351533	0.136105	0.312392	-0.0237052	0.222529	0.0549112	0.0976818	0.0454186	-0.000288328	-0.114448
CACTTCAC	0.48019	0.394482	0.29188	0.39159	0.224497	0.374416	0.440673	0.17766	0.457966	0.0392662	0.287184	-0.0291102	0.249162	-0.139686	0.260033	0.200656
CACCTCAC	0.471933	0.249504	0.35918	0.39882	0.327652	0.438571	0.423161	0.25193	0.410247	0.120891	-0.105355	-0.0605785	0.00213353	-0.153018	0.237086	0.0840876
CATCTCAC	0.45464	0.318676	0.31697	0.36196	0.11768	0.264927	0.317521	0.0367201	0.402732	0.0111775	0.311233	-0.0802681	0.274721	-0.0891374	0.180928	-0.0610465
GTTCCAAA	0.140631	-0.0184287	0.00888	0.05743	0.0876469	0.268841	0.103041	0.00698157	-0.0084664	-0.0269346	0.272348	0.40211	0.454367	0.343803	-0.00754246	-0.0772599
CTTCCAAG	-0.0575703	-0.159346	-0.144249	-0.218177	-0.195861	0.0294585	-0.0840577	-0.134199	-0.116941	-0.104576	0.334772	0.436936	0.45895	0.405341	-0.175945	-0.107058
TGTACTAA	-0.000764711	-0.152143	-0.0145	-0.03214	0.141048	-0.0586932	0.00975207	0.00579771	0.0658662	0.188138	0.37363	0.430869	0.450829	0.44025	0.100977	0.0718858
TCTGCCAA	-0.263451	-0.0488153	0.09222	0.01644	0.0569552	-0.181816	-0.304672	0.0155434	-0.234486	0.00837534	0.229972	0.427851	0.453467	0.445201	0.0828719	-0.0807898
ATCTACCA	0.123031	0.0532572	-0.04515	-0.179588	0.157117	0.138096	0.14886	0.151576	0.199149	0.217011	0.391539	0.430185	0.457431	0.430298	0.164611	0.154686
ATGTACCA	0.204686	0.0367774	0.00617001	-0.149349	-0.0044858	0.23833	0.122335	0.00667313	0.215978	-0.0334356	0.454534	0.423371	0.456551	0.416845	0.0869156	-0.0490796
AGTTAGCA	0.366547	0.304754	0.30235	0.24437	0.103781	0.123618	0.24076	0.285325	0.231825	0.198695	0.40317	0.459678	0.42875	0.432526	0.136648	0.136468
TGTGCTAA	0.299511	0.308566	0.33511	0.29548	0.290696	0.133586	0.224045	0.285973	0.236569	0.255733	0.33532	0.441853	0.430495	0.452316	0.184967	0.0382244
TACCAAAA	-0.104144	0.0381648	-0.01115	0.07509	0.227878	-0.0368448	0.125553	0.241566	0.0903973	0.301156	0.251115	0.437341	0.417482	0.47041	-0.0175872	0.233838
CTTAGCAC	0.35473	0.375557	0.27474	0.32737	0.269837	0.0399531	0.187417	0.310289	0.257287	0.25311	0.296104	0.458828	0.41766	0.447787	-0.023063	-0.0130519
GGTGCCAA	0.406659	0.408187	0.39956	0.39488	0.290971	0.32754	0.398469	0.334522	0.276977	0.0810209	0.166971	0.459503	0.387725	0.424915	-0.160206	-0.179317
GTTTGGTA	-0.233255	-0.0706262	-0.223508	0.14458	0.0103279	-0.0257524	-0.200966	0.0134572	-0.174715	0.057224	0.194789	0.458023	0.326267	0.414448	0.0620826	0.0791684
CCTACCAA	-0.0993072	-0.325337	0.09337	-0.123657	-0.0504336	-0.0866471	-0.0490503	-0.0894759	-0.10846	-0.205355	0.255337	0.456373	0.385372	0.433058	0.0304395	-0.132975
ACTTAGAA	0.0837347	0.190916	-0.13851	-0.0517101	0.23216	0.0972259	0.0914352	0.211701	0.161885	0.229155	0.338573	0.456689	0.417348	0.437504	0.0401473	0.130184
GTACCAAC	-0.0624812	-0.0358867	0.02444	-0.0565101	-0.0272556	0.0825292	0.00847585	-0.00715693	0.017983	-0.0204192	0.315518	0.462385	0.414443	0.43503	0.21165	-0.00414896
AGTTGGCA	0.21666	0.232046	0.24999	0.21514	0.115864	0.0232465	0.102805	0.0996406	0.0354695	-0.0431697	0.306558	0.463692	0.451709	0.399333	0.019074	-0.109474
GCTTGGTA	-0.20804	-0.0565659	-0.00305999	0.06515	-0.00435112	-0.239469	-0.301909	-0.104287	-0.154668	-0.0834533	0.330478	0.477386	0.449487	0.430019	-0.201368	0.0792585
GCTACCAA	-0.322841	-0.305453	-0.02462	0.11072	-0.0154182	-0.125259	-0.243297	-0.0492413	-0.134775	0.0213993	0.298677	0.462866	0.445345	0.469676	-0.0504681	-0.0196495
ATTTGGCA	0.208742	0.202636	0.17852	0.22032	-0.0377725	0.230999	0.106012	0.127455	0.118951	0.00818623	0.392907	0.480636	0.45469	0.469873	-0.038505	-0.0917786
TACCAAGA	0.0992258	-0.178516	-0.0785299	-0.01145	0.016637	-0.132422	0.124696	0.0369615	0.0295245	0.0720418	0.449249	0.475399	0.455698	0.474718	0.0603441	0.0402218
CTTAGTAC	-0.068597	-0.0420669	-0.131695	-0.205453	0.0984515	0.149915	0.192607	0.0384273	0.149267	0.0896798	0.3821	0.480589	0.457452	0.475254	0.043483	0.0765599
CTACCAAA	-0.253165	-0.11107	-0.140894	0.01409	0.107432	-0.153018	0.0354742	0.122383	-0.012157	0.0395101	0.271857	0.463936	0.465498	0.485042	-0.0344121	0.108317
TCTACCAA	-0.0366446	0.0848002	-0.234486	-0.0642799	0.133421	0.0782812	0.0418541	0.0851857	0.100859	0.108451	0.407941	0.468391	0.487888	0.49158	0.0722984	-0.0590052
ACTTGGAA	-0.0934824	-0.0777567	-0.135853	-0.124109	0.0729024	0.130459	0.0220732	0.0259661	0.046959	0.187047	0.404586	0.487749	0.476968	0.480347	0.00617061	0.110003
GTACCAAA	-0.191364	-0.16073	-0.0977502	-0.182391	0.163539	-0.0458888	-0.157349	-0.0054625	-0.183268	0.053194	0.390846	0.482267	0.487892	0.483735	-0.0206879	0.0199352
CTTGGTAC	-0.20575	-0.073744	-0.0850301	-0.00962	-0.0251515	-0.203858	-0.255284	-0.0389636	-0.183565	0.0786093	0.426143	0.494281	0.490697	0.494426	-0.174232	-0.0332669
ACTTGGTA	-0.176195	0.100699	-0.107058	0.10524	0.022023	-0.309098	-0.170553	0.149959	-0.166555	0.148425	0.449415	0.494413	0.494612	0.491638	-0.306148	-0.0855258
CTACCAAG	-0.268194	0.00585357	-0.05232	0.06593	-0.166354	-0.148149	-0.185699	-0.0751882	-0.14023	-0.208831	0.457084	0.488392	0.494903	0.493104	0.0158913	-0.18041
TGTACCAA	-0.0489484	-0.0459707	0.01535	0.00834001	0.0800764	-0.0521211	-0.0138196	0.155024	0.00191101	0.169551	0.478491	0.490847	0.497347	0.497612	0.0897357	0.181743
ACTTGGCA	0.0895623	0.263411	0.29492	0.18796	0.0660305	-0.0752587	0.0266293	0.0778008	-0.146852	-0.0627151	0.490269	0.494627	0.495302	0.494371	-0.163639	-0.121681
CTTGGCAC	0.186381	0.246139	0.30749	0.31658	-0.0355865	0.166305	0.111525	0.0506913	-0.0593542	-0.0594217	0.462702	0.491534	0.492479	0.484769	-0.217653	-0.129499
AACTTAGC	0.247597	0.0548908	0.08716	0.17234	0.0796696	-0.0557616	0.230181	0.0853515	0.154758	0.0694652	0.491393	0.494738	0.485221	0.460162	0.131666	0.156627
AACTTGGC	0.141462	0.068316	0.07378	0.08578	0.0958629	-0.0522131	0.140563	0.111135	0.0791348	-0.11986	0.497577	0.496368	0.490958	0.457818	-0.0621016	-0.0552251
CCAAGTTA	0.124216	0.0885667	0.0532	-0.132422	-0.0753071	-0.0516058	0.173337	0.0376572	0.107768	0.0394108	0.494859	0.4961	0.483116	0.451571	-0.0953142	0.134274
AACTTGGT	-0.0197792	0.00822661	-0.159517	-0.135067	-0.20942	0.0857028	0.113629	-0.000653158	-0.0768115	-0.0401231	0.494816	0.497017	0.480054	0.471108	-0.0589182	0.0908308
AAACTTGG	0.0248418	0.0350365	-0.01138	-0.0949798	-0.0904008	0.109131	-0.0272683	-0.162893	-0.105552	-0.0572679	0.476561	0.49674	0.476243	0.468471	-0.0891033	-0.0317748
CTGCCAAG	-0.147366	-0.180967	0.15109	0.06896	-0.307988	-0.0836868	-0.231966	-0.224949	-0.284164	-0.317718	0.425529	0.488465	0.475005	0.484377	-0.196257	-0.182102
ACTTAGCA	0.377233	0.297092	0.21191	0.13854	0.0919312	-0.0330019	0.135367	0.0723534	0.127615	0.141747	0.439437	0.488921	0.489376	0.488433	-0.21463	0.0643587
ATTTGGTA	0.119696	-0.122915	-0.00883003	-0.0727001	-0.0618033	0.116277	0.0931111	-0.0201192	0.0944118	0.0408763	0.426901	0.481394	0.487994	0.472875	0.0609804	0.166079
TGTGCCAA	0.114617	0.227148	0.2412	0.30287	0.103109	0.061192	0.0338145	0.125884	-0.0135563	5.52e-05	0.439129	0.477028	0.489543	0.470764	0.0886906	0.112166
TGTTCCAA	0.197285	-0.164397	0.08015	0.02593	0.0955482	0.037216	0.0354905	-0.0574794	0.122832	0.0678445	0.437725	0.463427	0.492981	0.457809	0.111489	-0.00590574
ACTACCAA	-0.0256927	-0.00427285	-0.07938	-0.0967599	0.00602834	0.133813	0.148175	0.0899142	0.178876	0.065199	0.374913	0.449884	0.477171	0.455907	0.171257	0.059672
CTACCAAC	0.0930819	-0.240121	0.13544	-0.120551	0.206817	0.105355	0.135231	0.0303825	0.20579	0.08364	0.422732	0.441834	0.467087	0.457025	0.320451	0.0375815
AGTTGGTA	0.131075	0.197293	0.15522	-0.02854	0.211548	0.226024	0.16606	0.180229	0.235439	0.232088	0.453318	0.471519	0.462535	0.470642	0.253154	0.0810353
ACTTAGTA	-0.00240639	0.0104415	0.06089	0.01944	0.178371	0.0356417	-0.0288001	0.0275843	0.0354846	0.111847	0.433091	0.479522	0.479303	0.466767	-0.14023	-0.0387509
GGTACCAA	-0.261618	-0.0275975	-0.106399	-0.00264999	0.090503	-0.168194	-0.294692	0.0938804	-0.228233	0.104096	0.382753	0.486004	0.468302	0.462066	-0.00729794	0.161101
TCTTGGCA	-0.0123876	-0.000939967	0.2416	0.13805	0.0066843	-0.0410611	-0.13439	0.00860632	-0.156225	0.112892	0.374923	0.489935	0.451688	0.47385	-0.148017	0.0768992
CTTGGAAC	-0.106753	-0.0565461	-0.112901	-0.254212	0.148258	-0.0752049	-0.29393	0.0945904	-0.253462	0.225883	0.357719	0.48562	0.442304	0.483515	-0.189963	0.123078
AACTTGGA	-0.125259	-0.23439	0.06519	-0.01411	-0.0619535	0.0316239	-0.0969433	-0.134199	-0.0625281	0.122587	0.450711	0.495397	0.438205	0.486207	-0.161979	0.0536191
AAACTTAG	0.139212	-0.0385367	0.10646	-0.06744	0.0854634	-0.0116253	0.0238075	0.0195619	0.00820641	0.00237823	0.421975	0.494235	0.403935	0.475584	-0.0926784	0.0383014
AACTTAGA	-0.0626195	-0.098659	0.08096	-0.0323	0.156453	0.063609	0.00933383	0.115299	0.148131	0.185503	0.439192	0.485832	0.439006	0.452688	0.137262	0.184102
CTAAGTTA	0.189648	-0.0135568	-0.00101001	0.0579	0.108932	0.204054	0.163967	0.200882	0.159533	0.204463	0.470681	0.490313	0.456792	0.456454	0.0467685	0.0306394
AACTTAGT	0.205533	-0.00493344	-0.234104	0.05565	0.129721	0.203945	0.129839	-0.0906974	0.157946	-0.131695	0.465221	0.492248	0.444407	0.434369	-0.0770677	-0.0535719
CCAAGTTC	-0.0801813	-0.0694197	-0.264207	-0.0527901	-0.0912836	-0.0337624	-0.094458	-0.0581677	-0.0992991	-0.0700268	0.464193	0.490447	0.434576	0.388057	-0.15376	-0.16517
AACTTCGC	0.368721	0.266327	0.17127	0.10268	0.120519	0.0605089	0.232663	-0.0168108	0.159723	0.121285	0.453773	0.481076	0.419914	0.306519	-0.0351898	-0.115366
CTAAGTTC	0.245988	-0.0671117	-0.127819	-0.11945	0.106633	0.0632504	0.195303	-0.134199	0.152019	-0.109528	0.445476	0.478353	0.424723	0.357272	0.267033	0.122232
ACTTGGTG	-0.119246	-0.112436	0.07435	0.04399	-0.114327	-0.00278305	0.0338422	-0.142829	-0.119723	-0.143652	0.441656	0.487881	0.359655	0.254567	-0.3	-0.111919
CAACTTGG	-0.0405607	-0.186328	0.06253	0.11854	0.10947	-0.0480102	0.0416739	0.0442298	-0.0320789	-0.0235408	0.419357	0.490925	0.399067	0.389866	-0.0989043	0.00629067
ACCAAGTA	-0.124489	-0.0883143	-0.0645699	0.02029	-0.091784	-0.00732903	-0.0956484	0.135008	-0.21831	0.0836599	0.428726	0.482552	0.37532	0.38649	-0.274958	-0.0454516
CAACTTAG	0.051166	0.101944	-0.01039	0.16005	0.0935351	0.1399	-0.056677	0.19223	0.0566113	0.157824	0.417275	0.482174	0.402171	0.359718	-0.227165	0.0289106
ACTTGGCG	0.0396622	0.115145	0.0827	0.16772	0.0241347	0.00279205	0.162687	0.0157427	0.0168932	0.00634895	0.389151	0.480186	0.299645	0.293387	-0.0814285	-0.119654
AAGTTGGC	0.179111	0.0894498	0.03706	0.12692	-0.0938581	0.0775888	0.00326506	-0.0637948	0.116064	-0.0768632	0.354636	0.476702	0.362189	0.298824	0.0615333	0.0444795
AAATTTGG	-0.0453043	0.192353	-0.161439	-0.100174	0.0437468	-0.141454	-0.289279	0.167833	-0.224872	0.117155	0.250896	0.482011	0.281494	0.394998	-0.267366	-0.138828
AATTTGGT	0.200094	0.046922	-0.0741401	0.0338	0.0849634	0.0529514	0.0647336	0.106012	0.0238907	0.156554	0.35464	0.479187	0.369139	0.409713	-0.0713146	0.054912
CCAAATTA	0.130341	0.166481	0.01888	-0.01312	0.132996	0.147554	0.161161	0.156389	0.148878	0.189707	0.407993	0.475892	0.39273	0.420294	0.0761836	0.0824968
TACTTGGA	0.030445	-0.0255648	-0.185387	-0.137882	-0.0891273	0.00781083	0.01911	0.0203057	0.12043	0.120662	0.372724	0.471708	0.423028	0.358957	0.190511	-0.124413
AATTTGGC	0.138714	0.0529514	0.000840001	0.19318	0.033107	0.0637147	0.0976541	0.130802	0.0176906	0.089021	0.39371	0.468072	0.408116	0.36291	-0.0731188	-0.0728925
AAGTTGGT	0.0321489	0.0968956	-0.01424	-0.0837101	0.0523694	0.160939	0.101327	0.130228	0.148107	0.116833	0.406335	0.473298	0.393742	0.338641	0.245178	0.143679
ACTTAGTG	0.166883	0.0574797	0.12588	-0.0520801	0.185593	0.0563044	0.0820812	0.254262	0.0882851	0.160799	0.393866	0.47104	0.371858	0.336666	-0.0416806	-0.00341551
CCAACTTA	0.255367	0.243466	-0.135952	0.08494	-0.00505134	0.0783012	0.167946	0.227482	0.143514	0.189573	0.412898	0.470642	0.366447	0.312921	0.0406548	0.153458
AACCAAGT	0.0820792	0.232789	0.01821	-0.05185	0.154688	0.204269	0.16915	0.25769	0.170822	0.245903	0.414431	0.46666	0.412034	0.346736	-0.00348077	0.0376037
GCCAAGTA	0.132627	0.0426685	0.21334	-0.161261	-0.0657621	0.0837755	0.291156	-0.116685	0.210687	-0.141794	0.445771	0.46819	0.438401	0.308438	0.0653643	-0.0745877
ATACTTGG	0.0941549	0.0139737	-0.125806	-0.106098	-0.00566539	-0.0294658	0.0286906	-0.022382	0.00972754	0.022018	0.410904	0.469536	0.410779	0.33117	0.00896402	-0.0130429
ACCAAGAT	0.0939666	-0.0191198	0.05659	-0.03067	0.086621	0.055855	0.0891375	0.0573255	0.142244	0.101875	0.412177	0.460046	0.400212	0.277712	0.0875974	-0.095755
GCTTGGCA	-0.132975	0.0201255	0.1174	-0.0875199	-0.222257	-0.0171973	-0.111634	-0.26517	-0.183565	-0.278781	0.320517	0.459031	0.407602	0.349055	-0.202595	-0.307212
CCAAGTAA	0.119046	-0.0883565	0.16898	-0.161261	-0.0100811	0.197386	0.179008	0.0297153	0.237034	0.0704406	0.370085	0.463687	0.382541	0.310092	0.109471	-0.0252558
AATCTTGG	0.00866769	0.170248	-0.03077	-0.111407	0.144325	0.00460208	-0.0230002	0.120563	0.0854573	0.169568	0.375641	0.466528	0.365553	0.298774	0.0220743	-0.129158
AAGTTAGT	0.0156934	-0.0549243	0.12941	-0.15867	0.169694	0.161171	0.0493455	0.0326763	0.127284	0.157353	0.377635	0.467587	0.354859	0.368888	-0.0195595	-0.130539
ATACTTAG	-0.0612286	0.0878559	-0.03669	-0.01201	0.115936	-0.0536377	-0.0873989	0.0195083	0.0562434	0.138351	0.366015	0.466975	0.327064	0.333797	-0.216241	0.0166853
AAAGTTGG	-0.0136542	0.221075	-0.116622	-0.02654	0.0501877	0.12757	0.0752998	0.249074	0.136557	0.107736	0.363436	0.469552	0.361636	0.332192	-0.0319059	0.0281702
GCTAAGTA	0.107344	0.205403	0.17279	-0.0574	-0.000350102	0.0514164	0.135545	-0.0406563	0.209842	-0.0712987	0.316254	0.468777	0.358762	0.351336	-0.137366	-0.0924347
ACTTGGAC	-0.177211	-0.110624	-0.106803	-0.01705	0.155119	-0.0132115	-0.107779	-0.0446609	-0.0983798	0.113957	0.213799	0.46608	0.196459	0.331688	-0.112901	-0.0129128
ATCTTGGC	-0.246092	-0.117718	0.11456	-0.04394	-0.0866576	-0.114206	-0.223882	-0.21349	-0.106048	-0.187943	0.234323	0.465717	0.172574	0.229874	-0.134104	-0.121968
AACTTGGG	-0.0432821	-0.0860294	-0.128904	-0.01543	-0.0718951	-0.143533	-0.139041	-0.130803	-0.10804	-0.0546802	0.303462	0.462013	0.0712324	0.173475	-0.17122	-0.122768
ACTTGGAG	-0.0659613	-0.0678124	0.06144	0.04726	-0.14437	-0.188941	-0.107212	0.0080106	0.061267	0.0599876	0.363302	0.463863	0.24879	0.296417	-0.0221029	-0.00380083
AAACTTCG	0.219786	0.155194	0.06442	-0.02198	-0.0370165	-0.0173272	0.0877802	0.0161266	0.106819	0.0417912	0.370568	0.460721	0.348788	0.282051	-0.151145	-0.0259498
AAGTTGGA	0.0373094	0.201187	-0.0386	0.04932	0.1149	0.114452	0.0893433	0.255405	0.0771976	0.111571	0.336739	0.46008	0.349314	0.282061	0.0695029	0.130541
AATTTGGA	0.0360744	0.0265423	0.03116	-0.07372	-0.0704521	0.131351	-0.017247	-0.0347441	0.0251987	-0.0326745	0.298848	0.458785	0.341898	0.326592	-0.139147	-0.0863416
ACTTGGAT	0.0394758	-0.0752051	0.09385	-0.04332	-0.0259446	0.156035	0.140768	0.024674	0.142173	0.133337	0.262316	0.454969	0.253366	0.278774	-0.0122527	0.0540476
ATACCAAG	-0.0683101	-0.062753	-0.02912	0.0844	0.0625483	-0.210182	-0.0707193	0.112527	-0.136251	0.0828716	0.193583	0.451454	0.250822	0.292347	-0.319928	0.0390598
CTTGGCAA	-0.133913	0.0615793	0.12724	-0.0578301	0.0631861	-0.0991115	-0.0925279	-0.00363344	-0.13851	0.0703034	0.363754	0.454093	0.356595	0.34186	-0.183565	-0.0923531
ATGCCAAG	-0.102733	-0.0457329	0.13301	-0.147496	-0.034081	-0.0464574	-0.0670007	-0.0925901	-0.0869679	-0.0673812	0.368086	0.450788	0.331617	0.370559	-0.160033	-0.0554502
ATTGCCAC	0.215326	0.139093	0.26733	0.22459	0.0525185	0.0887039	0.299193	0.0950257	0.287397	-0.127084	0.142808	-0.108092	0.180115	-0.100524	0.451338	0.324074
GATTGTCA	0.249296	0.263735	0.25713	0.24954	0.184041	0.0973709	0.235378	0.268997	0.218228	0.189998	-0.0283096	0.0574594	0.0205623	0.0434138	0.461646	0.371524
ATTGTCAG	0.241778	0.132955	0.23571	0.09796	-0.0321456	0.246093	0.293356	0.0882004	0.211673	-0.050481	0.239433	0.126139	0.229691	0.0391891	0.46478	0.387706
TATCTCCA	0.237366	0.00278501	-0.02963	-0.148678	0.142215	0.122569	0.219784	0.111634	0.241772	0.173921	0.29013	0.203985	0.247214	0.0998053	0.46697	0.399596
ACCTTCAC	0.321023	0.124443	0.19995	0.25257	0.208904	0.292518	0.353548	0.147481	0.306781	0.138299	0.0748239	-0.0241914	0.0797231	0.0503145	0.475044	0.378068
ATTGTCAC	0.4225	0.397528	0.41909	0.4222	0.329859	0.269097	0.405033	0.381402	0.406255	0.315777	0.0664193	0.105793	-0.0114091	0.122711	0.491811	0.44906
ATCTCCAG	-0.0748688	0.0103246	-0.0981999	-0.182391	-0.0926084	0.0725302	-0.0415757	0.0473708	0.014145	-0.0400306	0.137206	-0.0540317	0.117453	-0.0747004	0.490316	0.457971
ATCTCCAC	0.112919	-0.153313	-0.164397	0.07493	-0.0809346	0.13579	0.162325	-0.0381417	0.118481	-0.0419638	-0.0311565	-0.0875378	0.0072731	-0.117328	0.489717	0.479841
ATCGCCAC	0.077075	0.129105	0.28472	0.12051	0.213719	0.230421	0.181181	0.246486	0.178185	0.118561	-0.00659295	-0.143533	0.1184	-0.14318	0.490727	0.488367
ATCTTCAC	0.279882	0.295816	0.2608	0.24728	0.219379	0.146153	0.294547	0.258107	0.234925	0.13992	0.0532833	0.0640783	0.0432154	0.0323319	0.484527	0.490804
ATCGTCAC	0.254836	0.276617	0.31304	0.3351	0.211024	0.213572	0.334066	0.315099	0.38836	0.34788	-0.137986	0.014088	-0.105849	0.0178528	0.481435	0.492013
ATCGCCAG	-0.12204	-0.140121	-0.135458	0.17457	-0.16073	-0.0944591	-0.0240559	-0.0272084	-0.0114254	-0.0556983	0.0311138	-0.178516	-0.0402994	-0.165956	0.474815	0.471882
ATCACCAC	0.230003	0.153505	0.22714	0.18591	0.178654	0.216548	0.332563	0.211443	0.308565	0.112689	0.090044	0.0838081	0.231248	0.0279644	0.467084	0.451742
ATCTTCAG	0.0335115	-0.0781268	0.02357	-0.04098	-0.0346157	0.101236	0.0908774	0.0922828	0.187861	0.139214	0.14174	0.12973	0.226153	0.137438	0.455421	0.419604
TATCTTCA	0.183513	0.176597	-0.00109998	0.09531	0.0864498	0.0778399	0.174514	0.234142	0.159187	0.14918	0.218183	0.119107	0.169981	0.159501	0.459443	0.357475

## Sheet: DM
Figure 6- Source data 1: Table showing 8-mers bound by atleast one DM with an E-score >=0.45 for all the DM TFs that have been analyzed by PBMs
	T075353_1.02d_1	T075353_1.02d_2	T075279_1.02d_1	T075279_1.02d_2	T074988_1.02d_1	T074988_1.02d_2	T074968_1.02d_1	T074968_1.02d_2	T075010_1.02d_1	T075010_1.02d_2	T075020_1.02d_1	T075020_1.02d_2	T075025_1.02d_1	T075025_1.02d_2	T075037_1.02d_1	T075037_1.02d_2	T075351_1.02d_1	T075351_1.02d_2	T075127_1.02d_1	T075127_1.02d_2	T075284_1.02d_1	T075284_1.02d_2	T075125_1.02d_1	T075125_1.02d_2	T075275_1.02d_1	T075275_1.02d_2	T075278_1.02d_1	T075278_1.02d_2	T075122_1.02d_1	T075122_1.02d_2	T075123_1.02d_1	T075123_1.02d_2	T075008_1.02d_1	T075008_1.02d_2	T075184_1.02d_1	T075184_1.02d_2	T075173_1.02d_1	T075173_1.02d_2	T075094_1.02d_1	T075094_1.02d_2	T075174_1.02d_1	T075174_1.02d_2	T075267_1.02d_1	T075267_1.02d_2	T075352_1.02d_1	T075352_1.02d_2	T075350_1.02d_1	T075350_1.02d_2	T075009_1.02d_1
AAAAGTCG	0.463087	0.342417	0.220318	0.335589	-0.111805	0.141579	0.032476	0.251023	0.217256	-0.0291444	0.0163011	0.201294	-0.0682679	0.259115	0.0145818	0.154883	0.129871	0.265183	0.0304809	0.29926	0.0299513	0.301946	0.0050934	0.225206	0.172056	0.350809	0.0764506	0.286132	0.0700372	0.168987	0.128749	0.337615	0.0516573	0.281615	0.0585057	0.343933	0.163549	0.392782	0.110924	0.386113	-0.0464911	0.345168	0.128384	0.209382	0.0591067	0.173502	0.189071	0.360061	0.37508
AAAGGTTA	0.463018	0.382102	0.255228	0.280527	0.0586086	-0.0623392	-0.0258846	0.0800511	-0.00911334	0.0553854	0.204192	0.0533164	0.116342	-0.126841	0.0546458	-0.0279715	0.0197301	0.0109848	0.152007	0.20789	0.233612	0.329849	0.184554	0.0684224	0.221897	0.207906	0.216514	0.26659	0.377291	0.123942	0.295182	0.342283	0.142824	0.257194	0.122198	0.277097	0.200235	0.329888	0.131187	0.239392	0.12376	0.257697	0.101575	0.0288594	0.0449928	0.00916068	0.0893447	0.164143	0.108931
ACCTTTCC	0.460003	0.354981	-0.0805153	0.1561	-0.104672	0.0324249	-0.026659	0.0982254	0.0091395	0.00612206	-0.209366	-0.00305995	-0.0729084	-0.00855214	-0.0521737	0.072251	0.0929583	0.193668	-0.132514	0.182625	-0.0162682	0.048472	-0.155129	0.0696423	-0.160555	0.143371	-0.127003	0.127634	-0.120691	-0.0570964	-0.164397	0.157211	-0.206601	0.182276	-0.0916218	0.104208	-0.163639	0.120896	-0.195078	0.16401	-0.243533	0.119987	-0.2	0.0221924	-0.0670702	0.0521348	0.0127599	0.067049	0.044718
AACCTTTC	0.477387	0.356449	0.126391	0.173217	0.00218448	0.0210096	0.103188	0.167931	0.0809434	0.0534356	0.0327285	0.133565	0.146945	-0.0598465	0.0578923	-9.29e-06	-0.0654995	0.0508428	0.124081	0.202317	0.052954	0.104594	0.0381759	0.0682371	0.0404839	0.163697	0.0355071	0.0904613	0.134049	-0.026297	0.100746	0.224787	0.0158291	0.117755	-0.0804067	0.138704	7.96e-05	0.212944	-0.051409	0.189037	-0.105948	0.213481	-0.0919821	-0.0448413	-0.0480503	0.044172	0.041089	0.240716	0.111593
AAAGGTCG	0.481605	0.412685	-0.0728374	-0.049495	-0.14034	0.0256688	-0.254668	0.080859	-0.225806	-0.044471	-0.154516	-0.15986	-0.195468	-0.00531834	-0.207727	0.0385916	-0.0160731	-0.0773841	-0.141908	0.153067	-0.142713	0.0049104	-0.24908	-0.0451398	-0.113847	0.0791343	-0.121112	0.00734856	-0.188941	-0.133819	-0.238405	0.089591	-0.127901	0.0917717	-0.0886464	0.127866	-0.228316	0.140004	-0.236452	0.120221	-0.0667313	-0.00299341	-0.22644	-0.0961173	-0.151428	0.0516695	-0.128735	0.126613	0.0748009
GAAAGGTC	0.491688	0.4299	-0.207417	0.0761202	-0.234486	-0.140782	-0.187943	-0.226841	-0.133442	-0.0982074	-0.216813	-0.127084	-0.210018	-0.215058	-0.200656	-0.193554	-0.11831	-0.0246326	-0.19431	0.0173872	-0.111976	-0.101144	-0.257187	-0.15867	-0.278516	-0.0687009	-0.319314	-0.205257	-0.301189	-0.225649	-0.271444	-0.0407488	-0.190309	-0.0667087	-0.165758	-0.166354	-0.253611	-0.113608	-0.273049	-0.079466	-0.1284	-0.151145	-0.202136	-0.205453	-0.181816	-0.0466537	-0.207676	0.0489909	-0.00574077
AAAAGGTC	0.484646	0.427336	0.202046	-0.024463	-0.0642948	-0.103386	-0.0747217	0.0277797	-0.0271301	0.084818	-0.136452	0.0120574	-0.0649039	0.142336	0.0413607	-0.0356023	0.0373663	-0.0407803	-0.186646	0.0932177	0.0478509	-0.0122136	-0.182974	-0.132975	0.0499517	0.0015496	-0.0475238	0.140709	-0.198716	-0.0985542	-0.145223	-0.0147508	-0.0997838	0.158835	-0.0964194	0.0475428	-0.0762378	0.108689	-0.059466	0.0735101	0.0107906	0.0843069	-0.132148	-0.127165	0.104045	-0.0898105	0.00836187	0.195998	0.147374
ACCTTTTA	0.426974	0.452089	0.326163	0.258737	0.178568	-0.0238659	0.135146	0.120067	0.0186266	0.206059	0.137996	0.256645	0.205328	0.148562	0.103351	-0.0668832	0.101001	0.0569761	0.266281	0.0900382	0.255862	0.121683	0.221088	-0.0145406	0.292891	0.0766399	0.278609	0.185424	0.250099	0.0497734	0.25171	0.214669	0.215996	0.16381	0.23559	0.155429	0.251784	0.20763	0.246746	0.158737	0.258088	0.113546	0.232027	-0.119518	0.231712	-0.181248	0.309158	0.0939768	0.169365
AAAGGTCA	0.493218	0.492749	0.0564463	0.222806	-0.214509	0.0644355	-0.0373438	0.109035	0.0327256	-0.0519943	-0.184164	0.176997	-0.229757	0.0869638	-0.0190207	0.149091	0.0628226	0.100549	-0.121396	-0.0594432	-0.0952425	0.157298	-0.166154	0.0523864	-0.102273	0.12918	-0.132514	0.103547	-0.23019	0.0210339	-0.104915	0.165552	-0.15157	0.199299	-0.201637	0.21219	-0.167985	0.2106	-0.188606	0.106575	-0.0386064	0.115084	-0.0135089	0.0642095	0.00941807	-0.0759169	-0.207935	0.102952	0.105603
AAAGGTTG	0.462199	0.445724	0.219068	0.00466399	0.115623	-0.110458	0.215366	0.171407	0.0422495	0.158051	0.0378612	0.134737	0.240168	0.0891236	0.171945	-0.0379686	0.0967356	0.0752226	0.074643	-0.024915	0.0761263	0.0619173	0.16566	-0.0955096	0.141759	-0.0725166	0.11287	-0.0411135	0.138307	-0.0702947	0.236254	0.032323	0.188338	-0.00588465	0.0481441	-0.0157195	0.186284	0.013861	0.035406	-0.0822406	0.0940552	-0.0885356	0.155688	-0.115677	0.206161	0.0404027	0.251349	0.064548	0.038271
GTTGCCAA	-0.0270574	-0.0144323	0.0238534	0.00899108	0.190108	0.138732	0.314348	0.194198	0.178069	0.237077	0.268112	0.135062	0.266773	0.212834	0.290484	0.13881	0.0687556	0.0147351	0.172553	0.0945918	0.286503	0.23183	0.21476	0.0933427	0.22152	0.0671732	0.290454	0.0493899	0.374967	0.147499	0.350546	0.295986	0.170972	0.0121789	0.199365	0.229164	0.23877	0.12674	0.106893	0.0313799	0.109067	0.0201565	0.139786	0.0721617	0.468065	0.360977	0.154575	-0.0719718	0.0940844
ATCGCAAC	0.0168792	0.0472425	-0.0190403	-0.102319	0.217275	0.0645818	0.394028	0.211453	0.187598	0.311881	0.189079	0.0931826	0.336631	0.166965	0.282224	0.124846	0.082167	0.0574958	0.0362399	0.137097	0.253315	0.229562	0.0620313	0.150054	0.196634	0.0949884	0.248963	0.250525	0.32572	0.156997	0.352896	0.326566	0.174705	0.116508	0.211266	0.188275	0.229426	0.183492	0.140611	0.11426	0.146963	0.056728	0.111059	0.087066	0.483679	0.42114	0.146194	-0.117393	-0.0449881
GTTGCGAA	-0.0380987	0.0577543	0.129701	0.106973	0.237774	0.00802732	0.364218	0.288408	0.221774	0.328931	0.236366	0.146205	0.330355	0.283141	0.208005	0.0688057	0.217508	0.12128	0.0475339	-0.00329666	0.208805	0.300202	0.235736	-0.0109214	0.204059	0.0435656	0.300918	0.228745	0.354933	0.189908	0.377521	0.317953	0.199721	0.131561	0.213852	0.273208	0.268657	0.190459	0.0628449	0.13444	0.0597315	-0.0558189	0.115121	0.0330675	0.493553	0.448866	0.0714861	-0.0183503	0.0489622
AGTTGCGA	0.0632189	-0.0588125	0.195089	0.14746	0.167844	0.0448231	0.363598	0.344125	0.184795	0.316095	0.294235	0.155727	0.287432	0.2247	0.265516	0.0916578	0.160019	0.227831	0.110125	-0.0418359	0.25124	0.290745	0.229402	0.0146248	0.264376	0.11894	0.317775	0.334603	0.311323	0.222122	0.392343	0.360728	0.209288	0.179371	0.169175	0.281605	0.230916	0.29134	0.128075	0.114733	0.144637	0.0861619	0.126561	0.101257	0.467303	0.424324	0.00976806	0.0186605	0.120654
CTTGTTGC	-0.000189068	0.151202	0.0933869	0.119846	0.276565	0.278311	0.357597	0.375772	0.398131	0.331685	0.310928	0.29535	0.36931	0.326052	0.271411	0.37835	0.141669	0.237636	0.0588453	0.197449	0.207177	0.23645	0.0994116	0.185341	0.225964	0.196323	0.31519	0.287533	0.282421	0.0829464	0.342587	0.362491	0.0279183	0.207825	0.32871	0.402653	0.225684	0.345914	0.219277	0.280419	0.238884	0.201589	0.207306	0.29333	0.459081	0.386157	0.342965	0.301893	0.0442056
GGCAACAA	0.0528476	0.0888585	0.057625	0.264202	0.229041	0.246195	0.312709	0.35852	0.367085	0.21688	0.291365	0.356884	0.354445	0.34364	0.232169	0.318515	0.216711	0.223043	0.0530225	0.260016	0.200049	0.323587	0.110042	0.256492	0.151571	0.292594	0.307906	0.367689	0.268932	0.0849003	0.340559	0.410897	0.04096	0.255691	0.269422	0.389283	0.240116	0.371522	0.159951	0.260661	0.137008	0.26454	0.137488	0.184067	0.4525	0.405782	0.093429	0.259123	0.10413
AGCAACAC	-0.0703363	-0.000872075	0.0668218	-0.172816	0.306483	0.290197	0.416542	0.418326	0.27639	0.346476	0.254961	0.301648	0.346902	0.347403	0.321733	0.314956	0.182653	0.265846	0.168506	0.00263571	0.198109	0.199864	0.0821181	0.169861	0.133198	0.0452538	0.304681	0.110225	0.217623	-0.101728	0.275913	0.288086	0.084455	0.0969461	0.33423	0.357206	0.213934	0.219276	0.187929	0.0659277	0.174991	0.100709	0.260934	0.22485	0.45029	0.288378	0.251124	0.16431	-0.0900088
GCAACACA	-0.0793998	0.0345792	-0.137779	-0.108778	0.220051	0.196634	0.402026	0.408665	0.296031	0.271499	0.18813	0.258376	0.310366	0.29585	0.277234	0.276125	0.217605	0.278602	0.0315375	0.096711	0.235247	0.175394	-0.092067	0.0695452	0.11242	-0.0204387	0.232491	0.0932147	0.256874	0.0919038	0.331374	0.286524	0.0261065	0.0512784	0.282578	0.403383	0.180594	0.2587	0.132073	0.181236	0.103265	0.0307402	0.135159	0.185475	0.457156	0.368438	0.309424	0.172626	-0.179588
AAGTTGCG	-0.0380043	0.0771559	0.349344	0.321534	0.354322	0.00452471	0.430073	0.410107	0.241483	0.375148	0.347768	0.295313	0.370409	0.321016	0.380692	0.0414816	0.16912	0.238793	0.240658	0.0112779	0.278169	0.215028	0.24808	-0.0618461	0.341654	0.0555309	0.326689	0.278681	0.314993	0.0638898	0.395461	0.270936	0.278554	0.158215	0.313863	0.301134	0.318358	0.255313	0.303986	0.14383	0.198509	0.0727743	0.309203	-0.0893812	0.462315	0.275929	0.207244	-0.0953185	0.0942979
AGGCAACA	0.0417414	0.0326776	0.00336746	0.140063	0.213129	0.299403	0.412436	0.369069	0.253929	0.353999	0.202546	0.324751	0.389676	0.290215	0.254418	0.281152	0.327264	0.249532	0.125636	0.210882	0.193859	0.219159	0.0208807	0.185143	0.156485	0.171169	0.295987	0.251276	0.290276	0.149662	0.350998	0.267266	0.0752186	0.133179	0.329812	0.315697	0.241332	0.303893	0.218894	0.201834	0.177844	0.2727	0.17806	0.227026	0.462823	0.373518	0.186659	0.175344	0.0410641
ACGCAACA	0.0676627	0.027288	0.135201	0.0853043	0.339526	0.246568	0.454562	0.428444	0.302408	0.417153	0.379709	0.36974	0.446351	0.362689	0.371811	0.293091	0.186106	0.306162	0.251805	0.254312	0.215981	0.276508	0.223118	0.146172	0.236594	0.225585	0.359933	0.291916	0.274239	0.157801	0.357754	0.303503	0.222515	0.135683	0.382141	0.348728	0.329352	0.319106	0.276305	0.20784	0.258343	0.136695	0.299872	0.225723	0.495188	0.471928	0.0956227	0.110942	0.0491911
CGCAACAC	0.00846288	0.0555683	-0.0283749	-0.158336	0.288694	0.106733	0.40886	0.439461	0.263299	0.357248	0.186057	0.272014	0.368688	0.338428	0.413513	0.146852	0.303523	0.239466	0.0104091	0.0802771	0.218426	0.201831	0.122115	-0.0745669	0.0853277	0.0487749	0.150122	0.14865	0.235261	-0.00227512	0.188761	0.204325	0.225419	0.0458099	0.243485	0.274025	0.174916	0.160226	0.0952025	0.1511	0.191997	-0.0270221	0.121941	0.00851878	0.476348	0.436086	0.0423109	-0.0424012	-0.128904
TCGCAACA	-0.0353444	-0.0217567	0.0724507	0.151265	0.353094	0.311573	0.453516	0.465665	0.320421	0.395864	0.364042	0.306153	0.423589	0.40529	0.410918	0.305023	0.219643	0.3849	0.155883	0.232079	0.373359	0.391474	0.282206	0.228114	0.304353	0.236219	0.41545	0.433709	0.456413	0.316535	0.467611	0.476949	0.323239	0.315832	0.398459	0.476894	0.411508	0.439321	0.224452	0.321744	0.217566	0.282098	0.262634	0.260954	0.498864	0.498345	0.279658	0.206474	-0.0255564
TGGCAACA	-0.059538	-0.181531	-0.228483	0.135081	0.15572	0.237632	0.390003	0.404463	0.34424	0.125773	0.252305	0.326418	0.337935	0.349723	0.244036	0.274836	0.0922159	0.0421195	-0.168194	0.167762	0.203622	0.320147	0.00280244	0.189289	0.0724899	0.237606	0.201621	0.39231	0.393618	0.207662	0.404339	0.46168	0.0414685	0.204964	0.167718	0.447309	0.179825	0.393135	-0.137986	0.226061	-0.117198	0.215025	-0.128988	0.186567	0.487053	0.474876	0.101138	0.216754	-0.100789
AGCAACAT	0.0159719	0.0841253	0.258912	0.23215	0.402339	0.267892	0.485266	0.483708	0.386641	0.454475	0.418315	0.398014	0.46796	0.461377	0.444538	0.299575	0.408096	0.357924	0.154578	0.294395	0.240606	0.391464	0.280852	0.111049	0.335158	0.239671	0.346008	0.400333	0.315292	0.178366	0.416235	0.44021	0.283111	0.310052	0.410308	0.471216	0.388057	0.439854	0.246651	0.337965	0.230571	0.265995	0.314978	0.139778	0.489583	0.446986	0.323974	0.358026	-0.00483264
CATGTTGC	-0.191364	0.0997975	0.199489	0.129194	0.441088	0.316482	0.486172	0.477968	0.359722	0.476578	0.440381	0.269653	0.475262	0.4095	0.45061	0.35667	0.305333	0.285206	0.109342	0.191473	0.303601	0.336695	0.295891	0.13488	0.364174	0.201608	0.39579	0.285602	0.40145	0.193715	0.426754	0.331607	0.290372	0.210306	0.452991	0.453572	0.440539	0.369157	0.282628	0.212614	0.271772	0.212144	0.309989	0.208912	0.493723	0.437029	0.388462	0.263483	-0.136653
AGTGTTGC	0.121885	0.0391729	0.164558	-0.113312	0.391669	0.271783	0.472724	0.474192	0.347528	0.4465	0.352228	0.359584	0.440235	0.40222	0.424201	0.322597	0.33657	0.308474	0.210477	0.203191	0.319971	0.159843	0.252876	0.116677	0.291713	0.169959	0.424847	0.229567	0.365403	0.00116914	0.418525	0.268267	0.321097	0.130184	0.379695	0.417957	0.374709	0.338847	0.237426	0.212291	0.275692	0.195795	0.299288	0.183008	0.48079	0.447043	0.31543	0.23996	0.00466719
GCGCAACA	0.14564	0.220367	0.181173	0.184268	0.392583	0.262814	0.455774	0.462376	0.384689	0.434685	0.319738	0.339079	0.450838	0.40954	0.400814	0.369568	0.295623	0.33299	0.138464	0.206498	0.28271	0.224902	0.203931	0.0984192	0.203927	0.237767	0.283331	0.311028	0.258677	-0.0346117	0.2755	0.275774	0.221808	0.178521	0.358225	0.414507	0.331639	0.280675	0.262916	0.273023	0.306195	0.153336	0.256047	0.0829094	0.47016	0.382215	0.128162	0.208854	0.0641115
ATTGTTGC	0.0815237	0.129266	0.329708	0.366343	0.409844	0.381066	0.477093	0.474528	0.469777	0.462258	0.397734	0.456866	0.475581	0.45458	0.431255	0.414151	0.373362	0.379746	0.226882	0.35333	0.417727	0.422107	0.378021	0.371789	0.424793	0.411735	0.457354	0.471939	0.433034	0.113873	0.469758	0.470902	0.340076	0.419295	0.451673	0.483576	0.461152	0.470695	0.348833	0.432492	0.296716	0.354874	0.39629	0.342388	0.492675	0.479679	0.397004	0.392809	0.191601
AATGTTGC	0.155711	0.160554	0.38514	0.361561	0.470952	0.345915	0.494544	0.491719	0.45608	0.484102	0.459703	0.458741	0.48874	0.4739	0.473526	0.337402	0.468191	0.461176	0.362199	0.355892	0.406365	0.470248	0.410566	0.236626	0.44813	0.351565	0.449819	0.463876	0.450946	0.317661	0.474876	0.47955	0.398882	0.343625	0.463751	0.489268	0.474473	0.483024	0.418135	0.411297	0.335049	0.330966	0.392879	0.221159	0.498916	0.497744	0.435114	0.379662	0.250792
ATGTTGCG	0.0620564	0.185012	0.270995	0.262802	0.431957	0.364115	0.486791	0.487881	0.428718	0.462986	0.433831	0.404199	0.477331	0.461334	0.430202	0.381105	0.306567	0.406333	0.250216	0.284525	0.380585	0.430258	0.321731	0.207019	0.329588	0.280623	0.427619	0.430888	0.446319	0.309939	0.475494	0.464104	0.340485	0.307047	0.453625	0.481916	0.466725	0.462358	0.347994	0.382739	0.282561	0.245335	0.348485	0.216924	0.499169	0.498412	0.252526	0.240922	0.014573
GCAACATA	0.189652	0.128476	0.233427	0.321086	0.442831	0.408903	0.487372	0.485139	0.42519	0.464718	0.43961	0.432972	0.474158	0.467882	0.422127	0.424776	0.429251	0.421722	0.26241	0.324938	0.315522	0.414479	0.33496	0.323399	0.314194	0.356667	0.359588	0.423002	0.37832	0.309901	0.463979	0.455112	0.31823	0.354684	0.451626	0.477807	0.456259	0.456433	0.372102	0.425024	0.282967	0.356997	0.322016	0.297079	0.494619	0.490586	0.380277	0.361007	0.140678
CCGCAACA	0.101355	0.0459155	0.199252	0.229244	0.352489	0.180606	0.450817	0.472579	0.39122	0.431335	0.298951	0.375211	0.443858	0.394859	0.389257	0.261337	0.30788	0.319473	0.161622	0.184632	0.325828	0.292882	0.350946	0.108584	0.336116	0.152282	0.390175	0.328363	0.38097	-0.0246664	0.422781	0.393888	0.214384	0.192745	0.406543	0.433161	0.370303	0.384134	0.273635	0.312127	0.119772	0.202082	0.235967	0.0598432	0.489505	0.474941	0.231103	0.0206733	0.0300993
ATGTTGCC	-0.00858018	0.14564	0.167487	0.200497	0.370886	0.317035	0.464258	0.456259	0.304736	0.416414	0.303635	0.293639	0.4374	0.399147	0.393121	0.328377	0.351193	0.290894	0.0777377	0.176406	0.290816	0.387117	0.232683	0.171286	0.271847	0.226575	0.320238	0.374738	0.385206	0.286183	0.422081	0.424081	0.227531	0.200039	0.33877	0.459654	0.364629	0.40766	0.211824	0.199565	0.242697	0.199614	0.166812	0.189666	0.493891	0.459767	0.252297	0.135343	-0.0296866
GATGTTGC	0.0549309	0.119048	0.0316825	0.201304	0.387452	0.273576	0.480137	0.47923	0.309333	0.441801	0.354727	0.298559	0.468195	0.444941	0.415314	0.363142	0.327939	0.378115	0.120272	0.258359	0.312966	0.406428	0.167369	0.128516	0.275356	0.197782	0.308595	0.388148	0.375932	0.288396	0.427087	0.443928	0.215416	0.298959	0.399874	0.471633	0.392395	0.442346	0.280015	0.335355	0.24441	0.252934	0.322954	0.227679	0.49663	0.492844	0.334451	0.283278	-0.0592432
TAGCAACA	0.077837	0.161963	0.217476	0.226241	0.442873	0.36252	0.471063	0.452167	0.376379	0.455399	0.42277	0.397661	0.457294	0.410574	0.435081	0.379232	0.369459	0.374873	0.146053	0.252221	0.414011	0.379792	0.341718	0.258137	0.376957	0.28105	0.432625	0.381679	0.437138	0.217492	0.454606	0.465738	0.303302	0.234321	0.441604	0.462255	0.43925	0.41258	0.312323	0.306501	0.314354	0.235667	0.364614	0.274218	0.489493	0.444962	0.383785	0.370123	0.0520302
CGCAACAA	0.198315	0.176563	0.288168	0.366312	0.434512	0.322801	0.450466	0.456097	0.442244	0.453864	0.390089	0.412635	0.467441	0.418813	0.391454	0.390508	0.259916	0.397053	0.317097	0.301823	0.389152	0.314648	0.362998	0.325867	0.390173	0.352575	0.437358	0.404674	0.420466	0.195615	0.464613	0.446927	0.313962	0.322018	0.418808	0.451937	0.415067	0.42578	0.379732	0.390253	0.346195	0.324932	0.339166	0.320941	0.495403	0.477697	0.312895	0.243051	0.241524
GCAACAAA	0.234003	0.259072	0.282909	0.357898	0.386801	0.201215	0.441694	0.432965	0.326827	0.440238	0.340975	0.371343	0.451459	0.393982	0.368209	0.278095	0.264559	0.34839	0.305811	0.261091	0.392033	0.365464	0.25031	0.206617	0.364562	0.332456	0.404746	0.399021	0.365062	0.127801	0.439642	0.436285	0.309455	0.307817	0.439666	0.430553	0.41197	0.410247	0.371538	0.349647	0.38733	0.303848	0.337101	0.14437	0.485312	0.452751	0.360613	0.29481	0.301917
AACATGTT	-0.0420164	0.0933983	0.388903	0.285942	0.421773	0.269277	0.47658	0.454079	0.328897	0.447468	0.473631	0.262403	0.475256	0.4164	0.432416	0.303202	0.287568	0.231358	0.390088	0.218563	0.248212	0.294705	0.351487	0.238075	0.346504	0.236576	0.419173	0.355694	0.265345	0.245644	0.402012	0.392227	0.319508	0.332447	0.433826	0.442673	0.447926	0.432795	0.411807	0.399818	0.473712	0.218544	0.468424	0.358759	0.401684	0.328406	0.336309	0.209619	0.00294792
ACAACAAT	0.216611	0.187075	0.402114	0.336593	0.435283	0.388916	0.420525	0.41971	0.354362	0.400396	0.453262	0.321525	0.438141	0.367381	0.398966	0.369092	0.309174	0.302902	0.428777	0.320001	0.315305	0.315611	0.405357	0.371305	0.391606	0.323583	0.41968	0.352578	0.369094	0.0804296	0.400838	0.383725	0.401817	0.296183	0.418305	0.437911	0.434518	0.440763	0.429236	0.423318	0.374369	0.313718	0.438185	0.397342	0.282394	0.261322	0.368836	0.288726	0.302507
AACATATG	-0.119518	0.124992	0.389194	0.146255	0.38222	0.187232	0.4645	0.333812	0.309241	0.450665	0.382478	0.313389	0.442163	0.170213	0.396253	0.234664	0.303271	-0.00379993	0.305201	-0.160206	0.332164	-0.158004	0.399578	0.11496	0.403093	0.0521317	0.419663	0.0668753	0.335192	0.0770482	0.418714	0.116904	0.294453	-0.0219712	0.399172	0.278256	0.434233	0.231481	0.404029	0.114736	0.356397	0.0550878	0.416795	0.221062	0.381531	0.181115	0.321597	-0.159176	-0.164207
AACATGTA	-0.211919	0.158571	0.382697	0.255167	0.323718	0.338798	0.440691	0.445446	0.293172	0.372743	0.393327	0.301765	0.385148	0.390253	0.340829	0.322687	0.251446	0.299942	0.356345	0.201466	0.331656	0.244371	0.334382	0.234763	0.377658	0.240435	0.423592	0.302435	0.384817	0.152758	0.402515	0.330258	0.385234	0.284889	0.437425	0.420831	0.454568	0.398049	0.406937	0.382937	0.378791	0.261239	0.446101	0.261973	0.366942	0.122636	0.35767	0.0751326	0.0689671
ACATATGT	-0.243063	0.138352	0.404153	0.281041	0.348223	0.248081	0.429216	0.251929	0.296251	0.417252	0.39104	0.248946	0.395673	0.0606355	0.381649	0.233649	0.320799	-0.0368831	0.208854	-0.177989	0.36204	-0.0912201	0.347042	0.161755	0.415973	-0.00317945	0.37975	0.203547	0.337229	0.107595	0.399745	0.109517	0.362225	0.0367821	0.42707	0.289239	0.456474	0.272386	0.399197	0.0523527	0.421167	0.0483587	0.440048	0.22468	0.312979	0.144977	0.358193	-0.228567	-0.162893
ATAGTTGC	0.212003	0.0808406	0.270584	0.334188	0.308926	0.40184	0.46024	0.475422	0.372271	0.391212	0.287471	0.339031	0.38663	0.451046	0.384006	0.435271	0.289148	0.385245	0.0752038	0.310819	0.288754	0.38709	0.228358	0.346254	0.290414	0.318354	0.293491	0.429653	0.324796	0.149291	0.421939	0.43502	0.284721	0.390471	0.311169	0.448293	0.337619	0.425482	0.176164	0.384586	0.128114	0.307534	0.220105	0.34617	0.28775	0.417692	0.184439	0.297628	0.133056
TAGTTGCA	0.210992	-0.10804	0.216432	0.305053	0.296461	0.430231	0.455323	0.464797	0.37426	0.402416	0.344085	0.363254	0.431286	0.452647	0.366312	0.442491	0.0424104	0.338326	0.251336	0.328498	0.136806	0.384058	0.265015	0.340695	0.272805	0.368171	0.315797	0.3919	0.289927	0.157019	0.36394	0.448819	0.0822562	0.324834	0.344426	0.461981	0.321263	0.448897	0.194192	0.391318	0.108241	0.307132	0.233551	0.374618	0.33301	0.433799	0.38269	0.458752	0.174984
AACATATA	0.133701	0.229475	0.295918	0.406825	0.317581	0.363872	0.397393	0.453674	0.267363	0.372999	0.318297	0.306912	0.325704	0.411316	0.302218	0.36611	0.178744	0.286222	0.390459	0.333443	0.251655	0.358451	0.365212	0.371781	0.337404	0.336001	0.312145	0.425412	0.240787	0.214654	0.349323	0.406218	0.260962	0.387924	0.360227	0.445239	0.379108	0.436404	0.371517	0.432326	0.294178	0.326656	0.376888	0.334823	0.332812	0.244496	0.259859	0.193963	0.309464
ATGTTGTA	0.235944	-0.0555331	0.229913	0.267106	0.354382	0.410315	0.440114	0.450474	0.338527	0.417757	0.357864	0.335647	0.435817	0.407458	0.400626	0.422672	0.186042	0.383752	0.25206	0.293772	0.19639	0.307761	0.224239	0.371229	0.32532	0.330489	0.288711	0.391293	0.14239	0.304206	0.320696	0.399086	0.235146	0.336404	0.368032	0.454665	0.391476	0.435991	0.359949	0.410075	0.364608	0.337148	0.402664	0.440999	0.288496	0.322718	0.308797	0.392027	0.168473
TACAAACA	0.144589	0.275104	0.332646	0.263273	0.342926	0.412527	0.434567	0.455537	0.395058	0.425251	0.314858	0.415508	0.426063	0.414341	0.404054	0.386658	0.342265	0.345038	0.347007	0.343946	0.345365	0.360617	0.281742	0.421324	0.381921	0.406388	0.324058	0.412264	0.211415	0.32841	0.332634	0.40464	0.410603	0.361141	0.436336	0.453259	0.387882	0.443188	0.422534	0.41775	0.398045	0.397686	0.438769	0.403936	0.328324	0.312008	0.372765	0.357083	0.259421
CAAGAAAC	-0.250585	0.198199	0.259421	-0.0801992	0.368455	-0.0359397	0.399844	0.273852	0.0968234	0.406452	0.354322	0.197401	0.455219	0.27105	0.347963	0.0698576	0.274567	0.0489909	0.232774	-0.0777187	0.302493	-0.0888133	0.257864	-0.128567	0.231125	-0.137161	0.266971	0.0512799	0.252342	-0.0355211	0.214445	0.036308	0.297655	0.0824471	0.302781	-0.043451	0.269721	-0.115989	0.310512	-0.120551	0.352587	-0.064192	0.234561	-0.192082	0.29067	-0.100218	0.271754	-0.204239	-0.139041
AAACACTT	0.244398	0.101597	0.269506	0.358324	0.279243	0.347921	0.45456	0.475237	0.448662	0.372239	0.323567	0.468478	0.404247	0.4655	0.378702	0.342702	0.158978	0.426186	0.173973	0.383546	0.133089	0.354583	0.162203	0.244997	0.266135	0.321797	0.300767	0.446037	0.0585983	0.315591	0.21661	0.409637	0.196089	0.37265	0.256323	0.441801	0.283429	0.414817	0.264128	0.390786	0.218676	0.351285	0.278801	0.307355	0.162868	0.252674	0.129001	0.348063	0.32847
AAACAGTT	0.0934892	0.17744	0.233392	0.313292	0.381143	0.289616	0.478135	0.480033	0.459218	0.450707	0.443425	0.4681	0.459955	0.463577	0.448676	0.347376	0.346916	0.375051	0.170614	0.29145	0.258177	0.374232	0.339836	0.2882	0.327304	0.300953	0.461417	0.479122	0.196221	0.141417	0.304873	0.372003	0.265057	0.32811	0.26991	0.40065	0.312703	0.378099	0.249173	0.3221	0.217426	0.328121	0.295267	0.135941	0.179014	0.0279023	0.123142	0.250794	0.285339
ACTGTTTA	-0.0542542	0.124684	0.0994334	0.27689	0.271995	0.323537	0.439225	0.459356	0.387652	0.406824	0.385302	0.424212	0.357698	0.418758	0.362226	0.303213	0.154366	0.239242	0.214817	0.148746	0.229133	0.292717	0.304562	0.293499	0.24686	0.287876	0.388719	0.43418	0.168899	0.117867	0.255382	0.339694	0.240431	0.19603	0.306735	0.380373	0.32801	0.340421	0.239305	0.32483	0.225358	0.17853	0.302676	0.228257	0.174691	0.0309183	0.128332	0.163736	0.223901
AAACAGTA	-0.0374422	0.161051	0.154114	0.12602	0.334553	0.222829	0.451693	0.448608	0.363752	0.441028	0.371939	0.341834	0.39261	0.385246	0.370797	0.26338	0.250639	0.212834	0.281445	0.121567	0.326615	0.277606	0.330543	0.185586	0.301392	0.264312	0.450989	0.427859	0.16076	-0.0564493	0.289296	0.252686	0.315227	0.272782	0.347477	0.335358	0.27455	0.302492	0.263945	0.239086	0.289148	0.0731831	0.352559	0.122683	0.278176	0.0990394	0.178356	0.0528769	0.155216
ACTGTTGC	-0.170774	-0.0821567	-0.0499078	0.174935	0.388527	0.273526	0.472554	0.466189	0.363643	0.410709	0.345772	0.391351	0.449672	0.372244	0.383803	0.282426	0.203892	0.34819	0.152266	0.00898694	0.330371	0.344638	0.320364	0.183386	0.279614	0.173139	0.489726	0.486753	0.356185	0.211469	0.385625	0.410872	0.156771	0.226856	0.415363	0.425923	0.382905	0.381785	0.242817	0.225814	0.164568	0.172207	0.246314	0.15804	0.453514	0.412419	0.292784	0.252396	-0.0378256
AAACTGTT	-0.146725	0.0821478	0.276493	0.190088	0.346546	0.113527	0.444595	0.432106	0.392281	0.40644	0.431908	0.401491	0.430932	0.389272	0.409128	0.205841	0.305641	0.090956	0.34582	0.0879599	0.187061	0.27131	0.335693	0.135563	0.329028	0.168219	0.43754	0.470323	0.207817	0.164339	0.278779	0.346286	0.244771	0.23558	0.265286	0.343312	0.273812	0.334005	0.285599	0.24194	0.219865	0.242168	0.338408	0.100135	0.157067	0.00399987	0.273077	0.127537	0.156072
GTTGAAAC	-0.0418714	0.184492	0.224522	0.208704	0.356964	0.235901	0.464354	0.456655	0.362527	0.44015	0.395953	0.39458	0.460575	0.420758	0.394334	0.293146	0.0930605	0.375844	0.223131	0.0946746	0.227531	0.219424	0.272745	0.0250673	0.166325	0.0627891	0.327633	0.290267	0.353855	0.05095	0.354451	0.255652	0.278277	0.225064	0.328978	0.290282	0.315416	0.235711	0.281267	0.129694	0.172386	0.137488	0.259539	0.0999299	0.259608	0.0036313	0.483452	0.47478	-0.0224061
TGTTTAAA	0.311073	0.0672058	0.367658	0.397646	0.343434	0.184089	0.45119	0.464176	0.385947	0.427143	0.393211	0.356932	0.423771	0.430223	0.363408	0.272925	0.255605	0.397291	0.380689	0.361641	0.180274	0.332462	0.286702	0.167523	0.325018	0.307368	0.352227	0.374412	0.202767	0.162098	0.365981	0.342833	0.288911	0.290622	0.394703	0.410965	0.413457	0.412685	0.399256	0.403771	0.361383	0.347434	0.405236	0.202395	0.281674	0.150703	0.421943	0.443595	0.351043
AAAGTTGC	-0.0071232	0.289203	0.393144	0.35932	0.318063	0.028822	0.466778	0.422898	0.280044	0.408747	0.246441	0.34238	0.463332	0.313011	0.40289	0.110385	0.380639	0.206368	0.170112	-0.00043284	0.313392	0.287625	0.286748	-0.0435691	0.345937	0.0242907	0.321344	0.297241	0.313665	-0.0636076	0.402927	0.345819	0.278398	0.114226	0.340271	0.265891	0.369034	0.240855	0.30945	0.117941	0.241784	-0.0343708	0.335954	-0.147496	0.460539	0.290653	0.28499	-0.0066283	0.189945
AAGTTGCA	-0.250864	0.102545	0.327016	0.189119	0.272946	0.00939782	0.454071	0.426806	0.272969	0.38215	0.26486	0.247982	0.44534	0.347533	0.35079	-0.0181821	0.305223	0.0807336	0.139798	-0.0704134	0.291	0.228737	0.121766	-0.0916537	0.227099	-0.0204806	0.241583	0.212318	0.321289	-0.0125387	0.383498	0.315736	0.210671	-0.0211299	0.380339	0.34849	0.317009	0.256016	0.293006	0.00266521	0.295665	-0.0289312	0.317736	-0.0761856	0.437068	0.202191	0.413675	0.337055	-0.0449306
AAACATTT	0.346205	0.0878244	0.439743	0.486155	0.389215	0.362445	0.485477	0.495095	0.483951	0.46178	0.41083	0.486651	0.488732	0.493834	0.428813	0.394585	0.325502	0.478488	0.337968	0.427094	0.168533	0.439998	0.32136	0.326264	0.319981	0.409818	0.358534	0.440801	0.237568	0.222518	0.36385	0.43822	0.274609	0.418332	0.326152	0.468611	0.420539	0.473017	0.367127	0.475554	0.214036	0.403669	0.349494	0.18987	0.213364	0.28011	0.2165	0.398069	0.475247
AAAGTTTC	0.0884697	0.128399	0.428498	0.473568	0.436428	0.0148243	0.477294	0.48717	0.436245	0.459326	0.390652	0.472529	0.482489	0.462153	0.454864	0.192927	0.322722	0.314547	0.186868	0.266594	0.250753	0.318265	0.236868	-0.0674741	0.314844	0.205223	0.253544	0.32426	0.275488	0.0377882	0.315208	0.387088	0.204844	0.259675	0.212054	0.36562	0.257959	0.37071	0.186054	0.331948	0.0907799	0.22627	0.188394	-0.192812	0.069096	0.0753406	0.204234	0.278408	0.387709
AAAACATT	0.127415	0.188402	0.403764	0.43625	0.390889	0.0940104	0.462045	0.473948	0.397377	0.455987	0.291262	0.405587	0.439004	0.454021	0.441069	0.157765	0.307432	0.365669	0.321417	0.314486	0.23474	0.346901	0.333333	0.0916411	0.404757	0.258604	0.328227	0.36341	0.202326	-0.0141931	0.313789	0.382403	0.326095	0.297677	0.259134	0.419158	0.373477	0.428562	0.342854	0.442471	0.21645	0.280446	0.287958	0.0611483	0.0327092	0.109772	0.234878	0.326337	0.426848
CAACATTG	0.102676	0.147236	0.281422	0.154756	0.418397	0.231518	0.477357	0.461782	0.387932	0.445988	0.406185	0.358532	0.443231	0.438898	0.421241	0.284056	0.415545	0.37716	0.306905	0.220339	0.368287	0.338974	0.289531	0.111978	0.344272	0.253767	0.407831	0.352978	0.368177	0.0136282	0.441165	0.397991	0.305782	0.154535	0.421575	0.450378	0.411789	0.424635	0.319258	0.330319	0.312125	0.231045	0.391895	0.217749	0.425457	0.366312	0.397744	0.315569	0.125786
CAACATTA	0.285102	0.104309	0.276873	0.319126	0.357663	0.385164	0.463051	0.452341	0.337326	0.400866	0.345256	0.347311	0.454553	0.431697	0.383872	0.378967	0.333035	0.401148	0.288091	0.30261	0.135738	0.318729	0.323041	0.310502	0.278361	0.329088	0.318333	0.333919	0.214228	0.301842	0.371336	0.396788	0.232319	0.252131	0.409615	0.455631	0.415675	0.422485	0.351548	0.406715	0.25718	0.32879	0.38962	0.35188	0.31553	0.405158	0.300198	0.350563	0.280476
GTGCAACA	0.117936	-0.102319	0.0961327	0.0607095	0.188511	0.199217	0.466525	0.445822	0.290609	0.370635	0.325421	0.247966	0.428194	0.403683	0.320967	0.239668	0.22469	0.319166	0.00384262	0.218728	0.133952	0.288262	0.0662226	0.0852767	0.154395	0.128587	0.21609	0.321143	0.126912	0.156064	0.315597	0.31819	0.0508282	0.268041	0.397956	0.441947	0.342451	0.396406	0.221044	0.314906	0.0413915	0.272166	0.280207	0.15094	0.405801	0.396555	0.384701	0.363556	0.0776024
CTGCAACA	-0.121183	0.129247	0.116863	0.15809	0.345548	0.255058	0.480389	0.468296	0.31456	0.439252	0.379256	0.361142	0.467768	0.409832	0.409372	0.279679	0.363478	0.317816	0.135781	0.139742	0.266799	0.308287	0.213145	0.147457	0.277062	0.173815	0.334708	0.375707	0.338534	0.183236	0.416406	0.384164	0.278859	0.198957	0.459264	0.470951	0.410234	0.422456	0.315704	0.331257	0.295698	0.192735	0.346204	0.236378	0.449475	0.385321	0.360944	0.27279	-0.154975
AAATGTTG	0.24983	0.264133	0.457285	0.390396	0.39039	0.374536	0.484127	0.469256	0.429221	0.461165	0.420547	0.43472	0.461868	0.438401	0.44417	0.342454	0.461919	0.376527	0.336399	0.354849	0.312898	0.36101	0.383363	0.273461	0.411543	0.328423	0.369684	0.32683	0.342425	0.24967	0.422364	0.384449	0.365768	0.260768	0.405102	0.427189	0.451165	0.426544	0.429406	0.348435	0.381194	0.333313	0.405961	0.299003	0.409068	0.368025	0.424414	0.383732	0.408801
AAACACTC	0.139548	0.0364525	0.0649109	0.132373	0.292114	0.364719	0.429115	0.450465	0.35713	0.37107	0.285119	0.31699	0.404973	0.389731	0.345976	0.374066	0.129524	0.254569	0.167501	0.241069	0.0941239	0.219675	0.105802	0.331451	0.130082	0.3308	0.188234	0.227505	0.0237217	0.255531	0.0315649	0.182703	0.0601125	0.180018	0.190408	0.316506	0.122113	0.300677	0.1141	0.272402	0.100694	0.3186	0.261976	0.291421	0.0550232	0.313311	0.104039	0.240936	0.192702
AAACGTTG	-0.00242843	-0.0304686	0.0653417	0.0920469	0.312672	0.223664	0.424463	0.455983	0.38997	0.336012	0.266663	0.342582	0.409617	0.426905	0.352972	0.288446	0.0971564	0.185861	0.09672	0.158965	-0.0182276	0.116111	0.196821	0.131669	0.12315	0.184848	0.0422567	0.265306	0.128784	0.0970979	0.169805	0.27464	0.145728	0.22838	0.162204	0.334477	0.238263	0.282014	0.165048	0.197239	0.0540434	0.274081	0.126781	0.165251	0.215993	0.208687	0.0385395	0.230634	0.0376364
AAACATGC	-0.0510214	0.0229505	0.176884	0.120065	0.305588	0.300218	0.424625	0.457259	0.372222	0.372036	0.359267	0.307721	0.437125	0.413605	0.328753	0.35177	0.186298	0.2936	0.106086	0.0954775	0.137139	0.111298	0.0139849	0.108225	0.144487	0.149762	0.221404	0.215541	0.0832949	0.14811	0.19263	0.21318	0.039485	0.177144	0.300462	0.334275	0.257632	0.247284	0.225697	0.236082	0.235669	0.103241	0.20195	0.222844	0.299043	0.139167	0.196039	0.0179419	0.111854
ATGTTTGC	0.072698	0.16524	0.103369	0.117306	0.319252	0.145415	0.442274	0.458363	0.367394	0.395802	0.234193	0.347467	0.435962	0.425536	0.403826	0.24675	0.124553	0.303335	-0.0271109	0.140646	0.0234089	-0.020253	0.158115	0.0876813	0.259045	0.120485	0.0963248	0.19335	-0.0232208	0.0550096	0.132429	0.186746	0.116066	0.201127	0.293906	0.352368	0.237725	0.311886	0.184479	0.283276	0.125192	0.0920411	0.211138	0.107299	0.176705	0.170075	0.120727	0.0208445	0.213605
CCGAAACA	-0.125493	0.116169	0.0706519	0.0198683	0.284562	0.119904	0.455654	0.47546	0.345719	0.42606	0.353133	0.31982	0.461643	0.444341	0.374415	0.259244	0.211115	0.348854	0.0473693	0.0888533	0.14307	0.23871	0.0923758	-0.0686169	0.125291	-0.0423316	0.126583	0.248382	0.126033	-0.0775692	0.219794	0.199154	0.0212909	0.139415	0.191755	0.3149	0.179905	0.181348	0.0694801	0.122965	0.0737091	0.013952	0.179878	-0.10278	0.17993	-0.0137231	0.046745	-0.0602279	0.0742561
AAACATCG	0.200199	0.0232606	0.0922828	0.24951	0.313713	0.342268	0.454833	0.467342	0.432892	0.389934	0.357963	0.427963	0.427843	0.441391	0.372567	0.39267	0.246077	0.35098	0.0569828	0.344563	0.051869	0.226656	-0.0023695	0.249482	0.125308	0.29728	0.091969	0.250689	0.0584284	0.236705	0.203158	0.364292	0.0785059	0.269925	0.095906	0.360703	0.236362	0.331433	0.168711	0.405998	0.100113	0.26645	0.114659	0.316481	0.238187	0.372649	0.0639548	0.354304	0.264337
TGTAAACA	0.159895	0.168868	0.151016	0.123357	0.266219	0.317183	0.459995	0.476246	0.319662	0.403127	0.381804	0.314074	0.400948	0.442526	0.343166	0.351339	0.173097	0.389376	0.187312	0.33475	0.125873	0.200704	0.190531	0.246642	0.150216	0.26658	0.292058	0.217459	0.147922	0.186001	0.243233	0.275543	0.257972	0.257599	0.341447	0.401422	0.337932	0.371631	0.34222	0.353625	0.254826	0.270966	0.369002	0.297638	0.246441	0.291877	0.165131	0.217227	0.217879
GATGTTTA	0.133558	-0.0292252	0.116632	0.321382	0.340515	0.311461	0.467594	0.477344	0.391506	0.371977	0.349461	0.43027	0.420191	0.452708	0.375918	0.360848	0.184789	0.396846	0.21547	0.254671	0.16336	0.248385	0.0933201	0.217101	0.143466	0.242836	0.228899	0.235201	-0.0302977	0.26776	0.202787	0.307198	0.104764	0.263598	0.273902	0.381737	0.300693	0.351755	0.284185	0.362695	0.195809	0.319134	0.299354	0.256505	0.173873	0.206935	0.183678	0.301023	0.261754
AACGTTTA	0.0649701	0.0576549	0.113393	0.211983	0.310178	0.171698	0.436698	0.452962	0.40936	0.299618	0.28098	0.358298	0.34693	0.419759	0.329962	0.171169	0.123419	0.150754	0.189971	0.273436	0.077354	0.295972	0.148492	0.165469	0.209774	0.268901	0.163959	0.269814	0.18307	0.00998153	0.260481	0.318185	0.24921	0.317362	0.270537	0.36386	0.252319	0.34556	0.23498	0.376438	0.259507	0.214138	0.233757	0.0697758	0.193975	0.122397	0.178809	0.178649	0.222321
AGTGTTTA	0.217434	-0.0529975	0.091905	0.273199	0.302322	0.380765	0.442257	0.456594	0.395249	0.332101	0.250387	0.363752	0.337359	0.421136	0.380303	0.344961	0.107685	0.334839	0.15493	0.294002	0.0273924	0.244654	-0.0472473	0.325455	0.156615	0.355278	0.245064	0.339167	0.0145483	0.380293	0.112683	0.274726	0.0937821	0.265052	0.190497	0.386172	0.189007	0.350844	0.13571	0.38557	0.190683	0.364164	0.263085	0.388487	0.108531	0.346552	0.122716	0.297666	0.19476
AACATTGC	-0.0302	0.0881964	0.309623	0.176452	0.313349	0.191359	0.460193	0.363749	0.290475	0.393136	0.335909	0.357486	0.382742	0.281	0.351168	0.155389	0.310279	0.159815	0.244511	0.06163	0.269589	0.175079	0.231061	0.137809	0.282269	0.204879	0.257451	0.17669	0.234478	0.19657	0.319575	0.280127	0.257062	0.0273592	0.35265	0.372242	0.342697	0.317531	0.333936	0.268472	0.354116	0.0962045	0.378393	0.183046	0.273072	0.229588	0.333297	0.287581	0.120475
GAGTTTCA	-0.239794	0.0978109	0.201879	-0.291721	0.289683	-0.0227485	0.460713	0.381998	0.133822	0.412764	0.294554	0.282906	0.414534	0.214426	0.391751	-0.0192462	0.215946	-0.0421137	-0.127572	-0.233348	0.181372	-0.140561	0.153911	-0.25157	0.16451	-0.319111	0.167671	-0.255909	0.112894	-0.191364	0.200188	-0.257675	0.138455	-0.315864	0.0705586	-0.249349	0.0899608	-0.338828	0.0302173	-0.318642	0.0440515	-0.261798	0.00564173	-0.221538	-0.129499	-0.31512	0.0594566	-0.292812	-0.291009
AGTGAAAC	0.0230075	-0.0359711	0.201562	0.150653	0.339074	0.242353	0.467242	0.408144	0.271529	0.436432	0.349189	0.362753	0.42281	0.360505	0.413486	0.283765	0.194325	0.165539	0.0486632	0.174898	0.0748347	0.031137	0.0998213	0.159552	0.125698	0.101723	0.195568	0.0594097	0.0994	-0.000568593	0.244986	0.133894	0.0953133	0.119165	0.183474	0.158241	0.127934	0.0775976	0.0221769	0.0747451	0.0761887	0.0785552	0.146818	0.134598	0.166	0.190705	-0.0525989	0.104271	0.0588666
ATGTTTGG	-0.170333	-0.0102196	0.179094	0.0657917	0.305445	0.12824	0.451691	0.411006	0.275496	0.360309	0.184064	0.22363	0.421525	0.391407	0.38933	0.159188	0.236743	0.117556	0.0840706	0.0844302	0.0877936	-0.00543379	0.044752	0.0201813	0.250025	0.036873	0.177371	0.103861	0.0822385	0.0457027	0.151968	0.0281466	0.131487	0.0534322	0.242591	0.241794	0.293073	0.13928	0.174587	0.142127	0.097547	-0.0491718	0.268275	0.0145614	0.14108	-0.0440584	0.079224	-0.0816437	0.154437
AGAGTTTC	0.0623993	-0.11986	0.0369895	0.134647	0.261813	0.0985364	0.457111	0.430897	0.269054	0.380287	0.216171	0.308877	0.416062	0.374395	0.379247	0.160394	0.159909	0.181153	0.0358041	0.0931101	0.0398544	-0.0610225	-0.0838728	-0.0124999	0.0254035	-0.0275698	0.00316419	-0.0245824	0.0150683	0.0120322	0.0774643	0.102604	0.0383668	0.0451368	0.146972	0.000358589	0.00655644	-0.0164167	-0.0499223	0.0640387	-0.0592026	-0.056282	0.0857714	-0.0684141	-0.19393	-0.128735	-0.0440704	-0.0438714	0.139029
CTTGAAAC	0.0634986	-0.0610458	0.13665	0.0767976	0.271331	0.21372	0.465578	0.423765	0.359802	0.412786	0.314483	0.350792	0.420734	0.368955	0.397756	0.242744	0.294128	0.194982	0.073248	0.134154	0.128285	0.162621	-0.040279	0.100753	0.127357	0.158213	0.0597653	0.121005	0.173456	0.135395	0.245571	0.215872	0.0822452	0.0643628	0.149303	0.236706	0.129136	0.203668	0.111885	0.0636884	0.130862	0.186798	0.140557	0.139304	-0.0840346	0.118473	0.109602	0.15244	0.0348715
AATAAACA	-0.0713676	0.306453	0.347916	0.0597526	0.398714	0.201487	0.450036	0.432497	0.22773	0.425812	0.305375	0.278878	0.425292	0.357375	0.394196	0.159276	0.355675	0.248186	0.393571	0.138859	0.363856	0.0940445	0.351313	0.0854312	0.301415	0.161637	0.356113	0.169365	0.258119	-0.0963499	0.354849	0.164513	0.331393	0.118148	0.361633	0.294764	0.413742	0.242748	0.418856	0.231757	0.380427	0.111766	0.403131	0.0452339	0.341381	-0.0116667	0.323015	-0.0586855	0.0815981
AAACAATA	0.198985	0.31669	0.38176	0.300705	0.423426	0.282893	0.463087	0.466918	0.403585	0.456553	0.407077	0.398535	0.449658	0.43765	0.427959	0.292202	0.328335	0.300677	0.405932	0.272514	0.393476	0.224555	0.397087	0.260714	0.417449	0.356222	0.425263	0.390179	0.34737	0.177634	0.400751	0.361485	0.39965	0.346631	0.403921	0.416721	0.42612	0.381604	0.434607	0.385088	0.402233	0.312592	0.376841	0.256623	0.351112	0.291427	0.309644	0.265867	0.299467
ACATGTTG	-0.22668	0.0303217	0.32945	0.161118	0.412311	0.312813	0.47672	0.456469	0.339699	0.465866	0.439642	0.243563	0.46891	0.408622	0.422981	0.334445	0.271812	0.327617	0.210315	0.177512	0.291547	0.294687	0.25244	0.205314	0.31914	0.198511	0.38328	0.319508	0.299071	0.216429	0.374442	0.361834	0.315102	0.269229	0.447469	0.443238	0.444291	0.388211	0.36257	0.368952	0.320056	0.216037	0.413094	0.345771	0.434417	0.355183	0.265055	0.160242	-0.104287
ACAAACAT	0.155993	0.285958	0.329019	0.345387	0.404206	0.389728	0.469426	0.465864	0.41571	0.424284	0.357429	0.418907	0.471673	0.459563	0.422284	0.374587	0.375265	0.324623	0.319168	0.300839	0.318757	0.297442	0.261215	0.338906	0.275014	0.377772	0.328329	0.365869	0.232688	0.339355	0.326324	0.367664	0.332387	0.318543	0.437781	0.436398	0.404552	0.417126	0.419422	0.403275	0.393664	0.394753	0.433675	0.372333	0.343923	0.310848	0.262357	0.376744	0.3496
CAAACATA	-0.11463	0.270881	0.311481	0.100443	0.335816	0.14738	0.451852	0.448468	0.32718	0.424704	0.360192	0.305075	0.429066	0.396156	0.408229	0.225836	0.337168	0.160468	0.299355	0.124523	0.237694	0.0854587	0.365801	0.0932448	0.336764	0.0891567	0.342526	0.148996	0.29755	0.048157	0.346	0.185268	0.339944	0.135557	0.426871	0.33425	0.396436	0.256429	0.385758	0.222213	0.321073	0.0402372	0.424007	0.151983	0.323536	0.047542	0.27382	-0.0451223	0.130247
AATGTTGT	0.168606	0.230129	0.400029	0.326453	0.418025	0.3915	0.480105	0.46928	0.392995	0.451361	0.403924	0.373974	0.473922	0.434956	0.442507	0.364514	0.438208	0.364105	0.31696	0.171788	0.298793	0.247918	0.359259	0.264026	0.401364	0.309733	0.349209	0.305035	0.303658	0.179036	0.406074	0.353927	0.327501	0.22133	0.443542	0.445481	0.439942	0.410072	0.432837	0.363813	0.394048	0.262852	0.437995	0.310264	0.300819	0.187283	0.32192	0.30072	0.2392
AAACGTTT	0.126272	0.113599	0.0837602	0.162987	0.42742	0.340645	0.473492	0.481009	0.480899	0.420767	0.456698	0.455832	0.481316	0.46629	0.413082	0.397756	0.174658	0.193243	0.267697	0.221422	0.0556359	0.291364	0.124986	0.282894	0.191912	0.338379	0.270925	0.274349	0.141131	-0.0367619	0.290457	0.338814	0.242908	0.316033	0.305006	0.370716	0.297447	0.395143	0.34509	0.403407	0.355527	0.348925	0.257651	0.189575	0.388683	0.30592	0.245391	0.170275	0.323693
AATGTTTC	0.166873	0.16718	0.43746	0.417854	0.493038	0.443263	0.49844	0.498219	0.496862	0.497397	0.488503	0.495952	0.497989	0.496837	0.493523	0.474217	0.480095	0.484831	0.340129	0.389661	0.413125	0.418764	0.437486	0.364592	0.449478	0.403347	0.455736	0.433002	0.441577	0.253445	0.468251	0.450474	0.412748	0.381494	0.431678	0.4682	0.466013	0.449895	0.418844	0.444551	0.324381	0.36286	0.389129	0.315308	0.400094	0.383277	0.272997	0.305001	0.332833
AGAAACAT	-0.0193433	0.163304	0.389035	0.337274	0.485294	0.430828	0.496264	0.495854	0.486114	0.496974	0.482289	0.485197	0.496412	0.491898	0.492065	0.466337	0.466946	0.464405	0.353098	0.288825	0.426532	0.358076	0.433102	0.343498	0.441934	0.31683	0.420986	0.421809	0.44043	0.311457	0.44363	0.417322	0.445552	0.352432	0.416876	0.448804	0.441708	0.401903	0.383888	0.348646	0.276289	0.281751	0.345548	0.318658	0.374155	0.280612	0.250144	0.25835	0.234505
ATGTTTCA	0.294165	0.182582	0.386457	0.434419	0.491792	0.468368	0.49893	0.497954	0.496949	0.498268	0.494229	0.495436	0.498068	0.49716	0.492708	0.485423	0.478905	0.479266	0.299713	0.432199	0.391694	0.442322	0.368762	0.38539	0.416925	0.436788	0.444922	0.449238	0.43122	0.223194	0.462335	0.460602	0.354888	0.436151	0.4524	0.48084	0.469203	0.472204	0.407026	0.462172	0.317647	0.415075	0.402377	0.356019	0.443001	0.414987	0.331702	0.352072	0.328397
GAAACATA	0.166155	0.138386	0.407928	0.40832	0.472743	0.45123	0.496415	0.495629	0.484943	0.491269	0.478199	0.48346	0.493003	0.489863	0.484461	0.473487	0.427124	0.464272	0.329904	0.38066	0.358683	0.388735	0.343712	0.356035	0.359393	0.362307	0.421561	0.427444	0.381112	0.207557	0.435606	0.440506	0.355733	0.424853	0.414564	0.463294	0.447482	0.437817	0.421683	0.428069	0.287457	0.381886	0.391093	0.378572	0.439227	0.375611	0.26789	0.259112	0.237804
ATTGTTTC	0.196772	0.290194	0.409889	0.359428	0.465795	0.393953	0.489505	0.489125	0.481785	0.491812	0.419629	0.469911	0.494401	0.476549	0.46814	0.45037	0.430472	0.42447	0.316736	0.270178	0.416249	0.363085	0.404412	0.296511	0.378085	0.329542	0.453429	0.45473	0.400885	0.152649	0.457189	0.450573	0.396047	0.390558	0.401602	0.452329	0.425178	0.404379	0.388228	0.404574	0.367648	0.344157	0.355274	0.237564	0.361133	0.22564	0.278621	0.244379	0.270501
TAGAAACA	0.0120511	0.133016	0.366284	0.220261	0.452395	0.318737	0.488416	0.480411	0.432023	0.483405	0.453684	0.454418	0.480606	0.458324	0.473929	0.394024	0.37121	0.373798	0.316788	0.250633	0.365702	0.371994	0.365669	0.21536	0.406697	0.257269	0.4219	0.424951	0.380722	0.184085	0.453726	0.450669	0.387605	0.31271	0.350249	0.422545	0.364745	0.37467	0.320332	0.277069	0.238035	0.241219	0.31257	0.179688	0.255749	0.107379	0.237604	0.28562	0.236446
TGTTTCAA	0.193276	0.103569	0.291249	0.24226	0.466057	0.341194	0.495148	0.494317	0.478523	0.490926	0.485781	0.476494	0.492894	0.489852	0.474013	0.415872	0.431871	0.438671	0.251197	0.284666	0.387076	0.437994	0.355334	0.208472	0.375526	0.24372	0.41562	0.441661	0.444846	0.154612	0.456229	0.454999	0.367003	0.402908	0.404518	0.476823	0.446206	0.425499	0.369746	0.385161	0.236691	0.337581	0.348379	0.164458	0.338359	0.217163	0.374564	0.370727	0.128429
TGAAACAA	0.116959	0.113396	0.326821	0.293783	0.447718	0.377302	0.493381	0.48925	0.47864	0.490634	0.457505	0.446232	0.491054	0.484216	0.472631	0.443592	0.35068	0.412253	0.306711	0.260703	0.329446	0.369369	0.257057	0.275053	0.324919	0.309315	0.361152	0.420358	0.321618	0.261366	0.414894	0.449893	0.240899	0.368596	0.360395	0.460632	0.384229	0.403404	0.346536	0.402373	0.294831	0.349265	0.30301	0.26145	0.228798	0.251786	0.194167	0.241647	0.116464
ATGAAACA	0.0943216	0.187223	0.303574	0.294622	0.465313	0.408415	0.493648	0.490371	0.483308	0.489418	0.471929	0.474912	0.484464	0.480443	0.472041	0.449109	0.389907	0.404785	0.332444	0.302596	0.358346	0.33189	0.247665	0.295244	0.314853	0.334934	0.358998	0.381562	0.349372	0.241262	0.396088	0.365819	0.264026	0.345534	0.367331	0.42016	0.398772	0.405691	0.340507	0.358067	0.306349	0.34206	0.320057	0.227253	0.340515	0.315526	0.226782	0.161543	0.30483
GTGAAACA	0.242532	0.0793335	0.31195	0.277747	0.471629	0.418263	0.493979	0.489323	0.474479	0.494432	0.477038	0.467709	0.4916	0.47934	0.478326	0.455366	0.392989	0.377831	0.312087	0.347415	0.260744	0.30367	0.351243	0.297359	0.300435	0.326201	0.381619	0.288943	0.268667	0.189157	0.343144	0.339087	0.250672	0.324279	0.366666	0.426905	0.38876	0.363596	0.291299	0.33336	0.247741	0.296651	0.330684	0.280704	0.368161	0.325972	0.203728	0.183242	0.192178
AGTGTTTC	0.137559	0.11293	0.185883	0.265487	0.428035	0.378566	0.490072	0.489775	0.460972	0.478789	0.430914	0.472322	0.486257	0.478863	0.466959	0.428863	0.388648	0.430822	0.153454	0.386479	0.276837	0.342993	0.287965	0.25709	0.328966	0.299254	0.381307	0.388631	0.305464	0.194538	0.349148	0.43105	0.304598	0.359579	0.340513	0.427914	0.279513	0.383776	0.246761	0.307121	0.251785	0.300128	0.343816	0.197962	0.254438	0.166634	0.22347	0.205928	0.261988
GTGTTTCA	0.0981408	-0.0376432	0.0210319	0.203374	0.43332	0.365984	0.488887	0.490666	0.446296	0.480191	0.450237	0.438842	0.477761	0.480537	0.453622	0.433854	0.350361	0.383415	0.171157	0.145639	0.264924	0.299075	0.217361	0.222235	0.217494	0.187572	0.230258	0.32358	0.33614	0.167173	0.317273	0.322282	0.206616	0.266134	0.283775	0.413999	0.287779	0.365375	0.15633	0.289191	0.134567	0.283566	0.205905	0.258417	0.133965	0.214938	0.208137	0.114102	0.115362
ATGTTTCG	0.0201828	0.0995393	0.270899	0.288132	0.448806	0.327008	0.490908	0.49181	0.458021	0.472843	0.465722	0.45196	0.487484	0.484473	0.455002	0.380461	0.324542	0.425672	0.278562	0.225527	0.222476	0.350689	0.293033	0.0748181	0.332662	0.254595	0.346312	0.334821	0.361717	0.136827	0.402935	0.363431	0.290107	0.323487	0.350527	0.422335	0.361881	0.372814	0.326807	0.374409	0.266726	0.231039	0.3553	0.185528	0.373144	0.321823	0.255995	0.202668	0.165161
GAAACATC	0.153587	-0.00562854	0.195196	0.245616	0.429886	0.345296	0.490203	0.488658	0.456969	0.478144	0.461374	0.450653	0.487384	0.474032	0.449486	0.381813	0.300922	0.428495	0.20653	0.194841	0.165369	0.28813	0.26719	0.187519	0.244983	0.194725	0.235968	0.30771	0.327299	0.282597	0.354824	0.315295	0.156244	0.308246	0.312773	0.366988	0.331023	0.300834	0.223367	0.239483	0.115269	0.233949	0.283217	0.205218	0.340057	0.27044	0.149557	0.225045	0.238875
GTTTCAAA	0.104578	0.11099	0.244275	0.207695	0.401518	0.216682	0.479635	0.471656	0.435535	0.454516	0.435207	0.435391	0.461712	0.453081	0.439982	0.25336	0.309957	0.315631	0.245686	0.225902	0.387577	0.303459	0.390127	0.0701913	0.403826	0.188547	0.422213	0.330376	0.450863	0.105381	0.458029	0.3651	0.396441	0.267682	0.330842	0.354987	0.412026	0.329969	0.3149	0.290184	0.255634	0.313016	0.183868	0.0254393	0.188939	0.132858	0.282383	0.147765	0.242301
ACTGTTTC	-0.0328303	0.113409	0.0867854	0.0503777	0.442885	0.154119	0.49103	0.485451	0.443584	0.475311	0.455463	0.42124	0.483511	0.472941	0.46726	0.291094	0.389036	0.379362	0.15151	0.180357	0.233516	0.235682	0.282259	0.089682	0.305608	0.155418	0.476444	0.388379	0.245281	-0.0768586	0.338856	0.236473	0.248644	0.252039	0.250038	0.22939	0.260873	0.187873	0.19768	0.0566579	0.167723	0.052766	0.256721	-0.0594826	0.199182	0.0578549	0.123775	-0.0814339	0.0606228
ACAGTTTC	-0.220831	-0.0623257	0.149073	0.050631	0.282583	0.183118	0.457466	0.448513	0.340593	0.408832	0.390357	0.324888	0.445833	0.379323	0.374332	0.218923	0.0583863	0.0887416	0.316986	0.047468	0.122316	0.0308932	0.138635	0.00943782	0.246828	0.0513723	0.434672	0.280029	0.187427	-0.076478	0.179016	0.0230079	0.120211	0.0725933	0.179161	0.11754	0.143357	0.0330454	0.238861	0.0365889	0.112626	0.0143849	0.257412	-0.0412059	0.0553141	0.0299565	0.102412	-0.0649556	0.0167233
AAACAACA	0.175896	0.269327	0.24557	0.110864	0.372442	0.360832	0.459264	0.454127	0.360254	0.433625	0.403131	0.346257	0.441685	0.426502	0.438021	0.354394	0.243026	0.396245	0.332136	0.20123	0.184497	0.254077	0.225023	0.201553	0.246473	0.252954	0.217756	0.236404	0.147309	0.182973	0.339185	0.285088	0.179638	0.193188	0.385471	0.410043	0.338325	0.359965	0.339775	0.335796	0.257015	0.237028	0.390515	0.274773	0.168534	0.218479	0.2198	0.30928	0.150822
AACAACAT	0.0408743	0.124334	0.296699	0.270005	0.374808	0.347215	0.457347	0.459563	0.375597	0.448245	0.411437	0.35139	0.449256	0.426717	0.429431	0.346141	0.363016	0.351279	0.282176	0.156691	0.264769	0.186016	0.250125	0.214695	0.343826	0.26604	0.284383	0.302737	0.24796	0.209247	0.377663	0.328891	0.296695	0.234796	0.396718	0.435333	0.401125	0.390805	0.408894	0.323291	0.346803	0.281462	0.407934	0.275736	0.274342	0.232047	0.285909	0.200953	0.132392
AAACATTG	0.0863594	0.10492	0.380113	0.302734	0.421917	0.179889	0.488309	0.483562	0.422159	0.469719	0.451662	0.428717	0.483647	0.458021	0.446042	0.268198	0.323555	0.314016	0.316914	0.296035	0.295654	0.29839	0.333136	0.145544	0.385203	0.243299	0.380862	0.383979	0.304485	0.144732	0.39002	0.446565	0.307765	0.261001	0.387528	0.439444	0.429118	0.411071	0.378773	0.389462	0.331464	0.26404	0.38196	0.125395	0.24362	0.238666	0.190594	0.248551	0.229918
CATGTTTC	-0.0993474	0.109458	0.315202	0.269485	0.46004	0.366061	0.492228	0.489416	0.450503	0.488096	0.478905	0.435307	0.491946	0.469995	0.463427	0.404171	0.387451	0.372645	0.242748	0.219892	0.359098	0.341145	0.294439	0.22386	0.341024	0.222459	0.373206	0.327808	0.415395	0.173922	0.430615	0.383541	0.3208	0.282202	0.415901	0.438924	0.406893	0.374522	0.343197	0.339858	0.279141	0.326392	0.307438	0.262002	0.397593	0.322054	0.224427	0.16612	0.190056
AAACATGT	-0.248678	0.148299	0.304288	0.18902	0.438131	0.286539	0.490489	0.478666	0.398392	0.472781	0.469351	0.31161	0.477487	0.460544	0.458226	0.29728	0.339226	0.340396	0.346341	0.113106	0.229978	0.193021	0.264553	0.110376	0.368186	0.213714	0.363194	0.264345	0.260489	0.14193	0.371987	0.279199	0.341251	0.243921	0.399755	0.388388	0.422349	0.355688	0.397488	0.319388	0.380593	0.176568	0.408894	0.153403	0.323318	0.143542	0.250656	-0.0301096	0.224625
ATGTTTTA	-0.116431	0.136898	0.357937	0.243639	0.405508	0.0710287	0.467426	0.450946	0.285631	0.455902	0.383425	0.294461	0.438367	0.419044	0.448548	0.169803	0.360346	0.228103	0.288128	0.188869	0.274255	0.176719	0.298463	-0.00975206	0.380502	0.173226	0.296313	0.21422	0.226483	0.0581905	0.309484	0.208957	0.352064	0.206872	0.301679	0.336121	0.348419	0.323173	0.340268	0.231451	0.312971	0.234503	0.312145	0.0955868	0.235322	-0.0761886	0.306385	0.177537	0.215452
AAACATAA	0.145836	0.26985	0.36629	0.366082	0.435303	0.283538	0.472779	0.462729	0.350253	0.473987	0.390815	0.439077	0.460392	0.433052	0.45344	0.359046	0.371206	0.275912	0.358254	0.237397	0.327128	0.210467	0.368806	0.221189	0.390179	0.281495	0.321322	0.332675	0.275887	0.258525	0.363584	0.367241	0.358592	0.291862	0.382871	0.390536	0.407525	0.375772	0.405522	0.355538	0.322408	0.266632	0.37997	0.182554	0.278489	0.131181	0.251299	0.110047	0.197595
AAACATAC	-0.122695	0.249667	0.353539	0.135136	0.408991	0.26791	0.478311	0.446375	0.282828	0.448289	0.429798	0.3385	0.459736	0.389127	0.449552	0.298699	0.377349	0.284812	0.232768	-0.0110166	0.292913	0.162634	0.337567	0.0870455	0.319159	0.109613	0.301137	0.249506	0.279628	-0.0635363	0.34831	0.184243	0.323482	0.112527	0.367279	0.384499	0.384724	0.293082	0.389191	0.232385	0.291372	0.212167	0.411649	0.222289	0.33343	0.145071	0.316093	0.156015	0.0191609
ATGTTTAA	0.152404	0.13896	0.362719	0.356827	0.425278	0.263877	0.482796	0.479784	0.359501	0.460641	0.408829	0.421922	0.459977	0.456325	0.43271	0.277281	0.341557	0.358549	0.372094	0.242779	0.294563	0.295771	0.307693	0.149407	0.39553	0.241557	0.348214	0.326461	0.22586	0.117077	0.361635	0.324089	0.300584	0.257602	0.397676	0.395788	0.414899	0.391806	0.432649	0.368116	0.347929	0.305778	0.443553	0.095466	0.341116	-0.0044728	0.421442	0.332665	0.277756
CATGTTTA	-0.0901142	0.184321	0.196637	0.171885	0.414595	0.366172	0.480738	0.461239	0.325764	0.440924	0.424274	0.369393	0.433058	0.394014	0.42395	0.341107	0.279323	0.233222	0.286247	0.199099	0.158109	0.0806442	0.172817	0.227402	0.308445	0.169549	0.283829	0.167285	0.0292323	0.136287	0.264753	0.275652	0.222663	0.209622	0.366869	0.338757	0.374676	0.3121	0.381718	0.287012	0.343792	0.196109	0.395456	0.22301	0.302295	0.145468	0.289038	0.104353	0.132382
TAAACATA	0.00576847	0.0866721	0.36227	0.23612	0.406463	0.21158	0.477889	0.467758	0.294688	0.455173	0.420404	0.368831	0.455928	0.405941	0.416761	0.257433	0.261802	0.24916	0.28682	0.157426	0.242764	0.243797	0.309681	0.0892995	0.401695	0.198453	0.320357	0.252169	0.231332	0.0470975	0.360018	0.208561	0.303734	0.179235	0.384904	0.36986	0.416072	0.316112	0.41448	0.289951	0.33307	0.125471	0.408216	0.0975855	0.287268	0.0250557	0.315047	0.0455282	0.119153
ATAAACAT	0.120895	0.231018	0.356648	0.329324	0.411708	0.320979	0.489578	0.478479	0.373434	0.456417	0.410433	0.419994	0.470105	0.428841	0.430662	0.328607	0.395169	0.382989	0.370394	0.280803	0.314295	0.207097	0.3629	0.239742	0.378874	0.258174	0.39409	0.329721	0.168561	0.202788	0.364955	0.348472	0.320225	0.284975	0.401749	0.397083	0.434302	0.378958	0.432638	0.331424	0.346661	0.282307	0.411785	0.228981	0.334504	0.1208	0.315453	0.134433	0.216824
ATGTTTAG	0.0656154	0.112408	0.207063	0.239589	0.359644	0.262886	0.460041	0.438605	0.363833	0.374444	0.407753	0.416447	0.432527	0.406075	0.373086	0.270056	0.162293	0.16716	0.147205	0.180268	0.070287	0.164386	0.0632872	0.195473	0.218918	0.19876	0.135565	0.212241	-0.123136	0.183573	0.182132	0.270833	0.19642	0.256201	0.228181	0.351627	0.307385	0.317086	0.234895	0.349354	0.176424	0.202974	0.305613	0.177423	0.155111	0.0920181	0.117421	0.144489	0.231417
ATTGAAAC	0.220006	0.00886272	0.0564255	0.139713	0.301066	0.314471	0.454966	0.438956	0.277301	0.401299	0.363622	0.373331	0.405451	0.419105	0.398187	0.345291	0.24038	0.248092	0.24362	0.229121	0.325062	0.382217	0.264773	0.274805	0.289191	0.245258	0.255239	0.317908	0.364377	0.158622	0.365236	0.391859	0.218907	0.290672	0.211333	0.357632	0.255598	0.327189	0.148853	0.369258	0.106427	0.28352	0.160006	0.164752	0.109289	0.210844	0.147284	0.281103	0.253267
AGGAAACA	0.174901	0.0965467	0.167038	0.119585	0.298382	0.335674	0.45173	0.446427	0.383033	0.425168	0.311274	0.349557	0.411025	0.413344	0.407493	0.393237	0.356682	0.388033	0.0973269	0.210436	0.253284	0.225153	0.200132	0.225565	0.172518	0.206914	0.205217	0.253074	0.218002	0.213291	0.18391	0.255594	0.284675	0.231283	0.251451	0.300153	0.174055	0.246651	0.122059	0.153319	0.141387	0.177689	0.164196	0.213489	0.136195	0.255602	0.0658885	0.0951899	0.0877638
AGTAAACA	0.0313054	-0.0663588	0.221835	0.117197	0.311258	0.231792	0.450335	0.434028	0.22154	0.407321	0.351946	0.187213	0.4001	0.386846	0.348759	0.221143	0.0620342	0.151674	0.204014	0.0983228	0.106726	0.140923	0.180377	0.110831	0.205836	0.121969	0.218684	0.119593	0.0900498	0.208226	0.242437	0.0612003	0.138434	0.0907726	0.294514	0.288088	0.304983	0.181638	0.259505	0.17393	0.270049	0.00838168	0.291766	0.119815	0.0849694	0.0707167	0.112869	-0.0345897	-0.00598806
GAAACACC	0.112974	-0.111976	-0.154821	0.196741	0.320704	0.347329	0.467251	0.46804	0.347077	0.427808	0.27652	0.335833	0.413945	0.422766	0.364799	0.397443	0.304464	0.281179	-0.203152	0.256023	-0.0291241	0.225076	0.00931677	0.215923	-0.0576526	0.183063	-0.080289	0.271332	-0.11945	0.190616	-0.0214334	0.319858	0.0393518	0.269418	0.0444307	0.355428	-0.00435982	0.290849	-0.0853909	0.263706	-0.0437624	0.176321	-0.020541	0.206428	0.0357605	0.218579	-0.057471	0.138142	0.116748
ATGTTTAC	0.0971343	0.0428934	0.283999	0.282701	0.427872	0.318135	0.47958	0.487282	0.395582	0.444966	0.428961	0.390494	0.451069	0.468671	0.41682	0.376091	0.17002	0.402116	0.292627	0.245903	0.159433	0.248035	0.235542	0.210774	0.248109	0.216282	0.272844	0.216495	0.162477	0.188316	0.301919	0.268523	0.182772	0.238764	0.346997	0.399445	0.375634	0.339553	0.36941	0.325834	0.236726	0.165373	0.367791	0.253517	0.27289	0.209621	0.1604	0.154332	0.165599
AAACATAT	0.178389	0.0172795	0.383004	0.373047	0.437774	0.336671	0.485007	0.487169	0.433895	0.460981	0.444312	0.395504	0.478409	0.473207	0.450277	0.391111	0.33126	0.411228	0.357613	0.358321	0.292459	0.314026	0.353041	0.251607	0.356609	0.350017	0.389277	0.382888	0.285809	0.110014	0.41194	0.381278	0.305734	0.396056	0.411906	0.430986	0.444739	0.418343	0.413402	0.385464	0.281701	0.24495	0.403918	0.286304	0.374485	0.234569	0.280037	0.208389	0.323545
AATGTTTA	0.255011	0.189491	0.418692	0.384085	0.418846	0.264514	0.489187	0.491722	0.437373	0.462801	0.432455	0.443635	0.475584	0.470326	0.427798	0.309876	0.367294	0.429545	0.366956	0.315904	0.25937	0.309278	0.347128	0.2197	0.35961	0.293264	0.379704	0.358442	0.14339	0.249339	0.365088	0.377321	0.314269	0.293471	0.333589	0.434215	0.415717	0.416316	0.403889	0.404533	0.300459	0.306934	0.397094	0.158565	0.326124	0.0574666	0.323424	0.294811	0.356121
AAGTTTCA	0.0613819	0.114985	0.425959	0.445213	0.435608	0.0819654	0.482387	0.485808	0.442016	0.475598	0.409188	0.441245	0.483713	0.468474	0.453731	0.207119	0.323426	0.386124	0.154719	0.263464	0.303802	0.335929	0.324096	0.00627651	0.310528	0.237445	0.309886	0.335214	0.341289	-0.0217287	0.345488	0.318454	0.30962	0.256724	0.278203	0.303704	0.343572	0.295222	0.236871	0.283914	0.0967969	0.195411	0.158513	-0.145469	0.216712	0.0477209	0.26458	0.30469	0.313189
AAACATTC	0.0893662	0.204807	0.38511	0.326068	0.42449	0.236615	0.483982	0.484395	0.402531	0.465496	0.327237	0.415502	0.475605	0.464808	0.452761	0.255259	0.400927	0.377278	0.279675	0.222585	0.257782	0.222826	0.278839	0.175436	0.379654	0.283712	0.304852	0.306674	0.172246	0.0674415	0.31361	0.307662	0.310576	0.265944	0.293201	0.380873	0.394269	0.385365	0.339016	0.37231	0.172088	0.23964	0.29649	0.129506	0.294151	0.15209	0.308339	0.167963	0.352456
GTTTCATA	0.10813	0.157608	0.259067	0.171163	0.406889	0.286411	0.447433	0.457233	0.382519	0.437145	0.348951	0.373083	0.435594	0.43206	0.433152	0.370771	0.244494	0.336513	0.248819	0.204852	0.298468	0.276722	0.16239	0.156311	0.244511	0.196104	0.292789	0.229734	0.231313	0.153648	0.234561	0.227688	0.223773	0.252725	0.216915	0.213198	0.240601	0.25242	0.260497	0.203741	0.271957	0.166445	0.249081	0.10428	0.18246	0.12677	0.137946	0.111506	0.242006
AAACATTA	0.124807	0.175158	0.411115	0.396312	0.442222	0.392887	0.489983	0.488314	0.451978	0.480971	0.435775	0.457726	0.480579	0.473062	0.468432	0.393071	0.432815	0.421974	0.34498	0.347818	0.323809	0.297575	0.362476	0.303921	0.405915	0.31063	0.405226	0.347583	0.289208	0.203433	0.413895	0.343638	0.367636	0.261485	0.407605	0.437557	0.440902	0.406216	0.426049	0.420351	0.336734	0.317198	0.416134	0.272701	0.307411	0.259784	0.247059	0.333955	0.31602
AATGTTTG	0.191694	0.153076	0.369943	0.387339	0.427875	0.266167	0.480332	0.482349	0.444286	0.450018	0.330849	0.432999	0.475669	0.476985	0.45653	0.258359	0.388295	0.364149	0.258043	0.335521	0.239241	0.241176	0.258131	0.242328	0.36279	0.350062	0.312979	0.338006	0.124349	0.0595982	0.307566	0.29437	0.324965	0.289456	0.391741	0.426508	0.41498	0.404502	0.351615	0.42019	0.279815	0.271187	0.350255	0.105316	0.195512	0.187277	0.205409	0.286445	0.382158
AGAAACAC	-0.00254934	0.0569146	0.138383	0.200769	0.354302	0.306687	0.464854	0.47666	0.408817	0.446534	0.369441	0.422101	0.449481	0.430235	0.400931	0.369074	0.224397	0.349281	0.0598129	0.286031	0.0521494	0.253465	0.0910029	0.101469	0.205461	0.176457	0.239875	0.310274	0.126698	-0.0184491	0.281393	0.334199	0.242299	0.271723	0.272121	0.362461	0.175162	0.267445	0.170431	0.248683	0.0795692	0.175779	0.24303	-0.00758303	0.16861	0.0285009	0.086213	0.161672	0.160098
AAACATGA	0.0994321	0.103452	0.173575	0.253953	0.386354	0.388207	0.454525	0.459376	0.405538	0.423191	0.342599	0.409999	0.447978	0.409917	0.404848	0.417574	0.201525	0.32398	0.222773	0.305379	0.219944	0.177591	0.157757	0.328556	0.258093	0.275628	0.297812	0.261712	0.209317	0.229022	0.29878	0.305505	0.234672	0.274625	0.350871	0.385851	0.331665	0.351241	0.321012	0.308807	0.318535	0.34664	0.350813	0.359016	0.289674	0.265401	0.206661	0.201145	0.278942
ATAGTTTC	0.167491	0.0843491	0.328202	0.381286	0.402647	0.353868	0.482744	0.481858	0.467041	0.472115	0.38695	0.447468	0.462338	0.473968	0.446781	0.400305	0.282856	0.351874	0.216941	0.288852	0.272334	0.354893	0.278975	0.273939	0.302409	0.323603	0.270099	0.380919	0.319543	0.311831	0.369516	0.398946	0.273758	0.399122	0.22784	0.339832	0.2573	0.352141	0.160465	0.319268	0.179026	0.298363	0.227372	0.202565	0.142456	0.164458	0.116313	0.160148	0.196705
AAACACTA	0.210588	0.175767	0.242128	0.271784	0.385242	0.360235	0.450301	0.442721	0.401335	0.43064	0.366176	0.393445	0.415134	0.423597	0.406664	0.362008	0.261811	0.352183	0.262629	0.322902	0.264498	0.254488	0.183787	0.359599	0.286876	0.371498	0.315052	0.365509	0.215292	0.297654	0.214103	0.294949	0.258471	0.310261	0.278762	0.338929	0.273702	0.341125	0.284035	0.306679	0.244853	0.352938	0.322471	0.357591	0.265991	0.252037	0.297738	0.323763	0.271603
ACGTTTCA	0.197808	-0.00335917	0.0827746	0.025771	0.319982	0.381226	0.469052	0.461512	0.400145	0.428264	0.380458	0.425576	0.450088	0.449392	0.426329	0.393527	0.070708	0.312687	0.15853	0.0693765	0.00754386	0.12061	0.146027	0.293496	0.183403	0.266425	0.140319	0.0923127	0.192146	0.285744	0.244512	0.193546	0.124606	0.14704	0.237432	0.209045	0.204106	0.18496	0.164915	0.261856	0.135937	0.219841	0.146427	0.288386	0.102846	0.364272	0.0848545	0.20947	0.0787937
GTTTCAGA	0.129217	0.154234	0.186456	0.214919	0.337321	0.232162	0.458888	0.457605	0.383638	0.427501	0.352135	0.402216	0.41676	0.447082	0.401592	0.275376	0.0823619	0.323384	0.0817416	0.177216	0.0941747	0.280315	0.208645	0.128593	0.105993	0.159127	0.225144	0.223442	0.210228	0.0952854	0.233581	0.289566	0.127965	0.153896	0.139284	0.29755	0.147144	0.195883	0.0814507	0.267859	0.0211668	0.110365	0.13138	0.115665	0.115916	0.0963071	0.0947386	0.181792	0.10369
ATTGTTTA	0.0197126	0.173739	0.348224	0.289387	0.380392	0.157525	0.462242	0.461297	0.331942	0.419928	0.371068	0.261853	0.45773	0.427313	0.38669	0.202488	0.105011	0.29418	0.341468	0.240156	0.21141	0.181895	0.357289	0.0479226	0.354828	0.241538	0.346989	0.324195	0.226464	0.0960451	0.375908	0.259619	0.279476	0.157706	0.336575	0.310701	0.410398	0.264708	0.39933	0.239034	0.263982	0.213179	0.375104	0.0950717	0.216435	0.077652	0.310748	0.0812645	0.200861
CCTGAAAC	-0.232975	-0.0820465	0.0178185	-0.175449	0.334405	0.0665901	0.453854	0.436241	0.23165	0.362755	0.317622	0.322962	0.44985	0.391813	0.385593	0.13663	0.184717	0.177911	0.0243009	-0.00910418	0.0971511	-0.0323636	0.00520534	-0.0657796	0.0134921	-0.0818514	0.080626	-0.00747792	0.193333	-0.0686181	0.0618381	-0.0226484	-0.0640303	-0.0557119	0.114673	0.131103	0.0388665	-0.0945966	0.0799166	0.075983	0.0723534	-0.038213	0.0157497	-0.0978381	0.0326922	0.000664956	-0.0122543	-0.004532	-0.173283
GATAAACA	0.0688361	0.165605	0.237738	0.225717	0.326308	0.200483	0.451432	0.445121	0.260786	0.388753	0.337888	0.301623	0.413242	0.383884	0.396146	0.204286	0.210603	0.324317	0.277564	0.153218	0.25994	0.107876	0.293336	0.118478	0.303378	0.0951847	0.301044	0.207407	0.202301	-0.0404482	0.310234	0.165508	0.273452	0.225799	0.359728	0.294781	0.335443	0.257558	0.325447	0.23575	0.271924	0.146307	0.345371	0.00838719	0.213601	0.0159457	0.263382	-0.0331943	0.0347276
CAACATTC	0.142884	0.00856494	0.189565	0.23323	0.254376	0.2207	0.450844	0.437844	0.345981	0.351289	0.22472	0.324169	0.420402	0.376948	0.38972	0.246901	0.295123	0.31976	0.140807	-0.00345057	0.0944546	0.161672	0.0791647	0.0655318	0.214891	0.0821857	0.16684	0.253258	0.122917	0.124611	0.255272	0.237175	0.0693607	0.145217	0.261729	0.372953	0.291919	0.275546	0.171233	0.210469	0.204195	0.138916	0.255157	0.21391	0.261773	0.288021	0.172185	0.225407	0.193433
AAACATCA	0.186311	0.0973167	0.189977	0.303877	0.399449	0.266693	0.462184	0.465469	0.34006	0.400844	0.370885	0.348905	0.450335	0.439578	0.402768	0.278052	0.301286	0.394699	0.0847718	0.200605	0.175708	0.211992	0.200118	0.13258	0.21977	0.224256	0.221045	0.263629	0.164078	0.122226	0.221651	0.258907	0.157164	0.253315	0.255446	0.361734	0.30174	0.315467	0.286812	0.247979	0.208521	0.193093	0.266836	0.158953	0.207155	0.168466	0.167287	0.202436	0.281568
AAACATCC	-0.211919	0.0635959	0.0999564	0.14771	0.335359	0.16785	0.462544	0.456999	0.313879	0.413129	0.327228	0.282504	0.4402	0.429187	0.374119	0.199706	0.103001	0.155187	0.172058	-0.156703	0.107568	0.0518025	0.100995	0.0683102	0.17941	-0.02973	0.138643	0.0530463	0.0926111	0.143164	0.200693	0.0387196	0.0141865	0.177344	0.1663	0.223247	0.27294	0.177773	0.117895	0.068827	-0.0451477	-0.0532214	0.148497	0.00883119	0.182274	-0.0118802	0.175211	-0.21349	0.129532
AAACATCT	0.0306696	-0.0667228	0.230559	0.186421	0.337464	0.225534	0.467991	0.454249	0.28962	0.407932	0.404721	0.328004	0.448188	0.42795	0.405289	0.255194	0.265172	0.258729	0.289093	0.00846538	0.130552	0.177693	0.134388	0.0924465	0.210784	0.121289	0.215329	0.22542	0.151982	0.250887	0.282067	0.20653	0.14856	0.145123	0.318135	0.340604	0.317685	0.289727	0.238625	0.295075	0.232324	0.265232	0.326267	0.222137	0.17238	0.198107	0.140216	0.302476	0.165706
GAAACAAC	0.0220561	0.0765728	0.196497	0.135334	0.397459	0.265284	0.473968	0.463601	0.40783	0.444354	0.42802	0.363387	0.475864	0.450208	0.454233	0.289955	0.272252	0.256832	0.30145	0.150962	0.239692	0.353338	0.265339	0.129747	0.235565	0.135074	0.313196	0.326645	0.272745	0.204877	0.352856	0.368055	0.146684	0.285517	0.359983	0.398347	0.272136	0.287295	0.291011	0.264499	0.292468	0.0897725	0.316843	0.119404	0.223213	0.0623045	0.110503	0.195281	-0.0699933
CGAAACAA	0.0537273	0.098099	0.175805	0.194136	0.372293	0.251658	0.463519	0.456585	0.413502	0.439518	0.400275	0.37528	0.474478	0.435787	0.419331	0.328097	0.26101	0.214125	0.188766	0.173461	0.246646	0.200246	0.222022	0.126443	0.302205	0.127771	0.319761	0.304361	0.279191	0.100419	0.408555	0.326077	0.238614	0.26303	0.210886	0.37051	0.285039	0.295942	0.199107	0.261241	0.167921	0.200108	0.221997	0.15717	0.21613	0.142041	0.0409504	0.179636	0.190431
CTGTTTCA	0.00258083	0.0950844	0.0449269	-0.156225	0.369596	0.0639967	0.474017	0.46653	0.3754	0.437194	0.4394	0.385255	0.469525	0.444323	0.41342	0.189713	0.24264	0.0705279	0.145826	-0.0600108	0.184747	0.105389	0.202721	-0.120482	0.170478	-0.0129507	0.327131	0.0306459	0.223118	-0.0502891	0.292416	0.0427885	0.183883	0.134428	0.252975	0.207649	0.232255	0.0741215	0.153906	-0.00905777	0.0839041	-0.154363	0.223306	-0.194692	0.153554	-0.0343729	0.127844	0.024155	0.15675
CTGAAACA	-0.0492931	0.0047826	0.0106824	0.181543	0.404002	0.355644	0.487959	0.489711	0.441528	0.454289	0.453052	0.453644	0.483668	0.475488	0.416918	0.397074	0.193322	0.335776	0.110998	-0.0782269	0.101679	0.216023	0.116912	0.15821	0.137409	0.110045	0.211114	0.280758	0.233198	0.0908877	0.271644	0.315188	-0.00338742	0.175514	0.281212	0.390435	0.223484	0.25063	0.16247	0.233166	0.114496	0.232015	0.20678	0.19994	0.138816	0.212103	-0.0330394	0.00644587	0.0491724
AACGTTTC	0.122496	-0.100656	0.0276444	0.095495	0.379457	0.326112	0.471673	0.474622	0.41872	0.42783	0.418384	0.421266	0.470563	0.453146	0.398621	0.38856	0.0428595	0.192919	0.182214	0.120922	0.145615	0.227507	0.186434	0.25701	0.171491	0.232277	0.161639	0.234978	0.241636	0.180065	0.299367	0.303162	0.187643	0.197166	0.202327	0.295143	0.237562	0.304609	0.167281	0.258671	0.110457	0.258411	0.141051	0.212599	0.188914	0.282857	-0.052183	0.246388	0.0565718
GAGAAACA	-0.0984686	0.0500719	0.118199	0.207133	0.356689	0.331834	0.467141	0.476911	0.392429	0.44227	0.308812	0.395923	0.478079	0.429604	0.40074	0.3612	0.210014	0.300581	0.184419	-0.0288307	0.171504	0.14972	0.129251	0.180568	0.2151	0.161879	0.170727	0.189967	0.18383	0.0264396	0.213918	0.189391	0.0849845	0.111311	0.278855	0.336024	0.217576	0.196903	0.202278	0.120563	0.0779335	0.14623	0.187851	0.136513	0.125412	0.0895871	0.0444949	0.036928	0.0153624
GCGAAACA	0.0347441	0.234929	-0.0161026	0.109025	0.344403	0.281881	0.477485	0.465117	0.438222	0.425794	0.372297	0.388157	0.47396	0.456339	0.394121	0.344762	0.292758	0.258359	0.190872	0.0615753	0.140912	0.172929	0.0974983	0.112589	0.239814	0.189872	0.181101	0.234587	0.110024	0.124727	0.140042	0.140376	0.151066	0.238515	0.182033	0.32111	0.195971	0.204732	0.12851	0.255891	0.0809401	0.200527	0.0761364	0.148922	0.189783	0.246286	0.0489867	0.0421496	0.122328
CTTGTTTC	-0.166756	-0.14698	0.022389	0.0422459	0.271485	0.244987	0.446778	0.443592	0.412428	0.39904	0.376274	0.370254	0.456986	0.409012	0.360506	0.308247	-0.0320584	0.204751	0.177274	0.00914943	0.05758	0.0757348	0.165065	0.0802632	0.238428	0.087901	0.167219	0.194703	0.289642	0.0688328	0.351699	0.151535	0.0992475	0.078437	0.210709	0.279357	0.21824	0.103644	0.0580594	0.0263315	0.118198	0.10506	0.137659	0.139351	0.00150364	0.0941198	-0.00430463	-0.0684168	-0.181816
GAAACACA	0.0736679	0.0358694	0.209201	0.0845148	0.37959	0.332586	0.458232	0.453266	0.283405	0.457302	0.398148	0.246897	0.432904	0.422417	0.40119	0.365129	0.259917	0.274573	0.13648	0.12369	0.216562	0.260472	0.206006	0.154759	0.262896	0.183544	0.233387	0.253666	0.213742	0.141853	0.268893	0.219065	0.231626	0.201009	0.297565	0.317734	0.22553	0.200278	0.240008	0.167699	0.134542	0.235817	0.241723	0.176921	0.196579	0.206232	0.0984542	0.136638	-0.0153613
AGTTTCAC	-0.0447647	-0.106248	0.346479	0.179943	0.351693	0.177773	0.472738	0.46511	0.276802	0.445486	0.372882	0.344856	0.449999	0.401491	0.416267	0.218012	0.237978	0.115551	0.0321792	0.126329	0.0801995	0.0802096	0.146143	0.111603	0.180719	0.101588	0.166261	0.153018	0.0719463	-0.0610651	0.13135	0.184582	0.112951	0.0127698	0.118493	0.160329	0.10545	0.0693583	0.0122308	0.0645292	0.0543502	0.0580768	0.0380384	-0.0450522	0.0384196	0.0792296	0.0214271	-0.037655	-0.0714157
CGAAACAC	-0.0468456	0.0563233	-0.00512693	-0.133819	0.3396	0.266989	0.454757	0.454912	0.382969	0.444175	0.322446	0.31789	0.441842	0.414338	0.391888	0.336877	0.148753	0.196766	0.0556724	0.112756	0.187811	0.185779	0.150052	0.112344	0.209834	0.0518989	0.181217	0.218965	0.123144	0.096384	0.174807	0.147751	0.119626	0.196729	0.231335	0.223194	0.171759	0.0840193	0.173468	0.0865448	0.231353	0.195067	0.22478	0.105781	0.213132	0.0935885	0.0595659	-0.0171011	-0.0689141
TCGAAACA	0.0262147	0.0676085	0.108773	0.115419	0.389372	0.217764	0.469939	0.457537	0.357679	0.451146	0.403661	0.364172	0.458051	0.418761	0.419939	0.295835	0.113113	0.255408	0.118307	0.153199	0.252265	0.161721	0.200666	0.0721116	0.335743	0.1566	0.369805	0.294167	0.347121	0.0761188	0.403725	0.380516	0.261425	0.269458	0.235749	0.318083	0.248587	0.254867	0.139495	0.179817	0.194079	0.159035	0.230897	0.0489325	0.3267	0.0951154	0.202006	0.0727524	0.108274
TAGTTTCA	0.004234	0.0577499	0.281817	0.269366	0.405705	0.329256	0.480896	0.473557	0.370225	0.474623	0.42535	0.405798	0.479216	0.451957	0.436908	0.375495	0.277967	0.343746	0.199516	0.243319	0.234852	0.250157	0.198151	0.205206	0.278878	0.19525	0.287826	0.297591	0.233668	0.169092	0.305625	0.329239	0.235736	0.291105	0.252418	0.276081	0.245619	0.23892	0.163827	0.23607	0.120566	0.134652	0.167534	0.147748	0.108362	0.0609206	0.141823	0.166826	0.113319
ATGTTTCC	0.0887416	-0.0154141	0.320891	0.269737	0.388687	0.323512	0.486692	0.481135	0.405175	0.471261	0.43015	0.395959	0.48558	0.459373	0.446517	0.392818	0.341409	0.385705	0.196782	0.232129	0.3054	0.270991	0.285821	0.139345	0.303678	0.167309	0.296375	0.283809	0.351934	0.183455	0.385174	0.407563	0.282151	0.307426	0.32633	0.419302	0.359562	0.381435	0.290249	0.318394	0.180572	0.286566	0.274166	0.255687	0.318044	0.299929	0.0834701	0.102678	0.172888
CGGAAACA	0.0410507	-0.00655904	0.0974024	0.152471	0.294994	0.260311	0.457779	0.449638	0.38762	0.430615	0.381432	0.35379	0.44645	0.417896	0.413018	0.293457	0.294275	0.226996	0.0319774	0.198161	0.117256	0.180019	0.253747	0.159566	0.236921	0.217106	0.261577	0.251094	0.186194	0.153869	0.144281	0.296648	0.132928	0.236352	0.140948	0.368483	0.119274	0.281556	0.0328273	0.24183	0.134236	0.18391	0.0812793	0.202364	0.0953859	0.295126	0.0326021	0.0782242	0.124922
AAGTTTCT	-0.0798428	0.141256	0.39822	0.331315	0.357708	-0.0500347	0.450759	0.415491	0.267477	0.413001	0.33811	0.379515	0.43821	0.405725	0.398883	0.0809668	0.115988	0.14583	0.193409	0.134519	0.27464	0.0600053	0.080874	-0.100436	0.256973	0.0109012	0.202214	0.0528156	0.243565	-0.0127275	0.292536	0.264607	0.212885	0.0875477	0.246976	0.219454	0.242754	0.15227	0.151606	0.18453	0.181333	0.0795596	0.222406	-0.154668	0.108592	-0.118575	0.181366	0.0842398	0.126808
AGTTTCAG	0.0194601	0.0450583	0.168627	0.121602	0.314688	0.0798048	0.467719	0.439344	0.358607	0.431312	0.34805	0.368035	0.444158	0.43909	0.399894	0.152451	0.162669	0.25923	0.0984993	0.0841025	0.0517237	0.0527616	0.154169	-0.0702051	0.100363	0.0172135	0.259406	-0.0172266	0.117287	0.00520792	0.138104	-0.0206485	0.0641524	-0.0230079	0.0628899	0.107019	0.01808	-0.0259914	0.0984455	0.0613074	0.0413537	-0.0154807	-0.0495407	-0.017866	0.0278486	-0.0701319	-0.00824751	0.0340803	0.0304774
GAAACAAA	0.172414	0.254253	0.384555	0.288773	0.427817	0.372052	0.482572	0.460667	0.349046	0.485405	0.410508	0.399617	0.488433	0.449077	0.447763	0.398236	0.38741	0.346701	0.283857	0.305388	0.357654	0.32504	0.288077	0.338173	0.374056	0.367067	0.363557	0.394437	0.325264	0.271602	0.412002	0.457963	0.305826	0.346059	0.329968	0.424127	0.305765	0.405325	0.375313	0.355375	0.234688	0.41211	0.300314	0.260726	0.298323	0.316573	0.250684	0.257391	0.277903
ACGAAACA	-0.0894633	-0.128904	0.186707	0.0749048	0.385786	0.132711	0.468995	0.420205	0.323272	0.45383	0.397046	0.358228	0.481297	0.394353	0.416578	0.215672	0.196901	0.156023	0.220518	0.12107	0.148281	0.135955	0.259572	-0.0369692	0.23438	0.0933289	0.327651	0.208939	0.28166	0.140259	0.317433	0.202999	0.239112	0.183111	0.297899	0.26546	0.303336	0.196116	0.305535	0.197884	0.305378	0.183407	0.27894	0.0798322	0.224885	0.152331	0.0970334	0.150638	0.0282869
AGTTTCAA	-0.075885	0.113543	0.305518	0.219833	0.378076	0.112052	0.476009	0.454817	0.293964	0.462745	0.394275	0.337271	0.466844	0.39779	0.423054	0.182439	0.313402	0.212572	0.187728	0.121647	0.359213	0.262996	0.318657	-0.0382317	0.347808	0.0637858	0.382847	0.260075	0.386633	0.100042	0.403215	0.287645	0.323078	0.196333	0.301755	0.197282	0.346931	0.170562	0.215202	0.102753	0.126415	0.253747	0.207332	-0.0325551	0.051317	-0.0343853	0.412397	0.341567	0.108104
GGTGAAAC	0.00986901	-0.104769	0.232788	0.0473833	0.287003	0.103698	0.466472	0.431862	0.209073	0.446444	0.396558	0.296489	0.454798	0.368334	0.402619	0.198048	0.111859	0.0892547	-0.0822213	0.0226053	0.0893917	0.0329923	0.0923322	0.0381222	0.103554	0.0500248	0.17105	0.074486	0.158176	-0.0802617	0.223967	0.0682998	-0.0103657	-0.00919194	0.122937	0.154757	0.171736	0.0623573	0.10113	0.0462822	-0.0102756	0.0763872	0.00227363	0.00883863	0.109248	0.0737874	0.054047	-0.119246	-0.0329892
AAACATGG	-0.0137024	0.103597	0.18489	0.159348	0.337232	0.252	0.450259	0.421533	0.246617	0.430702	0.327388	0.255133	0.44002	0.367206	0.374857	0.24504	0.190637	0.0600504	0.219588	0.196346	0.0865181	0.155243	0.112312	0.149655	0.139417	0.165118	0.21129	0.0843833	0.144981	0.0689932	0.257727	0.176282	0.0283643	0.153957	0.32072	0.237244	0.254804	0.217299	0.279274	0.178268	0.134533	0.174826	0.235011	0.0422916	0.25184	0.179037	0.214336	0.187437	0.148536
AAGAAACA	-0.110237	0.325504	0.30005	0.136173	0.468891	0.147143	0.486523	0.46507	0.333577	0.486912	0.436368	0.38039	0.485752	0.432878	0.456558	0.24483	0.418486	0.260689	0.284962	0.131855	0.38901	0.310825	0.393337	0.0224522	0.374083	0.11921	0.404847	0.318939	0.410384	0.12164	0.419941	0.349108	0.416284	0.291771	0.391351	0.293383	0.400898	0.255863	0.391312	0.125187	0.270538	0.125131	0.372588	-0.0629128	0.359956	0.00923651	0.305234	-0.0195062	0.0299928
AGAAACAG	0.0140712	0.292742	0.161027	-0.065424	0.410703	0.0800815	0.463734	0.413281	0.240647	0.462587	0.36306	0.269171	0.456437	0.392143	0.43448	0.199261	0.331106	0.124809	0.2851	0.00155391	0.267281	0.0872498	0.26522	0.0364497	0.254473	0.0918867	0.317308	0.117893	0.269317	-0.106854	0.219031	0.0346283	0.279855	0.101748	0.27539	0.0394485	0.227135	0.041809	0.216808	-0.0225749	0.221295	0.0120183	0.297973	-0.0755401	0.263905	-0.0212292	0.24955	-0.130803	0.0144759
AGAAACAA	-0.107469	0.186043	0.320063	0.147231	0.436565	0.27984	0.479644	0.464531	0.353655	0.476032	0.385984	0.386286	0.489084	0.435746	0.447397	0.333958	0.354393	0.280036	0.320076	0.0359381	0.37573	0.29684	0.321641	0.173676	0.318453	0.158808	0.381785	0.338265	0.344145	0.127295	0.443779	0.411468	0.283627	0.194644	0.419963	0.371643	0.35474	0.291797	0.383631	0.15316	0.324475	0.1852	0.373389	0.0805116	0.291141	-0.0237745	0.262649	0.0641771	-0.0471339
AAACATAG	0.0416284	0.286126	0.348573	0.0981245	0.418618	0.296821	0.473376	0.46089	0.378586	0.459929	0.412676	0.400743	0.46846	0.435163	0.437199	0.323669	0.263346	0.329203	0.250957	0.230529	0.274251	0.198616	0.331244	0.205003	0.36827	0.215286	0.410206	0.202621	0.313045	0.147812	0.390003	0.29996	0.336718	0.246799	0.416409	0.362012	0.398493	0.301527	0.376452	0.320322	0.400042	0.264796	0.401146	0.286259	0.39109	0.195263	0.336064	0.106444	0.203492
CAGAAACA	0.0797616	0.206365	0.323393	0.23661	0.442464	0.291877	0.482157	0.470199	0.414002	0.482677	0.434453	0.43014	0.486736	0.455184	0.457346	0.351452	0.37918	0.350524	0.310231	0.190329	0.337768	0.181411	0.29212	0.172339	0.278891	0.20618	0.349732	0.305861	0.259014	0.00367446	0.359733	0.239676	0.330144	0.22653	0.415299	0.28428	0.314243	0.212001	0.304663	0.196592	0.336358	0.217911	0.3516	0.0990453	0.34223	0.0620552	0.220628	0.0523788	0.11529
AGTTTCAT	0.0414271	0.116106	0.297809	0.22593	0.396919	0.240793	0.473248	0.445061	0.361388	0.458125	0.406966	0.394898	0.472595	0.400363	0.446927	0.281683	0.201554	0.340451	0.172589	0.156084	0.212065	0.198575	0.152417	0.0844439	0.268611	0.144623	0.234764	0.302855	0.197909	0.125849	0.204354	0.204688	0.223288	0.194721	0.286268	0.170144	0.250405	0.185683	0.240837	0.156064	0.190971	0.0316749	0.250457	0.0881694	0.0808377	-0.00808936	0.0193061	0.157092	0.254052
AAACAATT	0.0248688	0.0980318	0.427408	0.398624	0.364758	0.15625	0.468287	0.45544	0.446644	0.45672	0.410591	0.420618	0.469261	0.4302	0.430421	0.253404	0.217108	0.2557	0.387407	0.27797	0.305307	0.270958	0.347215	0.128163	0.394995	0.223711	0.433646	0.417526	0.293308	0.139488	0.422718	0.396221	0.361078	0.279238	0.3987	0.375588	0.404342	0.366908	0.399625	0.358286	0.375102	0.285894	0.41179	0.0920396	0.295865	0.0346788	0.268941	0.22832	0.291418
TGGAAACA	0.190773	0.0198385	0.160097	0.203589	0.368927	0.368709	0.452411	0.46076	0.401436	0.456887	0.393609	0.41157	0.471967	0.428731	0.405665	0.370283	0.20692	0.23612	0.153618	0.357346	0.253773	0.382546	0.204601	0.287578	0.26233	0.290568	0.332949	0.285359	0.37536	0.0405414	0.370362	0.440863	0.233118	0.306105	0.26407	0.37628	0.227379	0.356488	0.199897	0.29787	0.0832098	0.278872	0.191752	0.258286	0.321944	0.331653	0.219842	0.31883	0.230505
AAACAATG	-0.0543403	0.193938	0.305012	0.239285	0.322122	0.297946	0.459859	0.47055	0.442518	0.45211	0.330067	0.40416	0.464962	0.447449	0.406202	0.352397	0.318182	0.303743	0.311038	0.264785	0.298246	0.323223	0.2798	0.202424	0.2952	0.297089	0.31601	0.35466	0.214805	0.161721	0.37705	0.391988	0.240472	0.212374	0.3759	0.379927	0.337746	0.340462	0.341532	0.288119	0.27247	0.263445	0.357109	0.201458	0.276043	0.0985723	0.275291	0.0860937	0.149993
GGAAACAA	0.206128	0.246521	0.360451	0.215793	0.334242	0.319134	0.454054	0.447969	0.424574	0.451515	0.350299	0.417859	0.463544	0.435822	0.428064	0.331052	0.342931	0.323289	0.277095	0.30963	0.332775	0.332028	0.348464	0.226061	0.346446	0.287427	0.351176	0.345384	0.373677	0.187038	0.356249	0.401894	0.324471	0.299539	0.339722	0.386586	0.295714	0.342354	0.272414	0.30968	0.27919	0.279056	0.276657	0.202585	0.302048	0.30606	0.199478	0.163064	0.140866
GTATACTA	0.254795	0.0259515	0.205345	0.239944	0.180429	0.449697	0.359915	0.374085	0.344716	0.306803	0.259836	0.250744	0.191	0.332477	0.255222	0.433061	0.0517629	0.335329	0.247673	0.343767	0.217359	0.312252	0.182317	0.455113	0.284324	0.405917	0.296359	0.320369	0.0995988	0.359971	0.268189	0.348698	0.26779	0.365165	0.386603	0.426991	0.356717	0.395377	0.364358	0.413024	0.256567	0.389491	0.402643	0.418527	0.303176	0.361142	0.139506	0.290386	0.0959154
GTGTACAC	0.258125	-0.36073	-0.115058	0.174475	0.0776379	0.339277	0.106469	0.22888	0.27237	-0.01393	0.229774	0.00126656	0.065321	0.188643	-0.0315458	0.327745	-0.0638909	0.350344	0.0317942	0.209277	-0.216749	0.182811	-0.0298092	0.318472	-0.19393	0.291008	0.0532078	0.0261205	-0.196257	0.273621	-0.14908	0.210308	-0.0620247	0.249575	0.255626	0.274768	0.0345803	0.227596	0.119029	0.303208	0.226276	0.326808	0.295687	0.456907	0.0873745	0.413754	-0.0324835	0.111983	-0.0469971
TGTTAACA	0.302651	0.00499863	0.336576	0.406488	0.205061	0.379785	0.326119	0.313054	0.384349	0.246993	0.401679	0.222496	0.201375	0.25485	0.299691	0.418346	0.169246	0.308065	0.21449	0.325512	0.214266	0.329625	0.259215	0.379355	0.216176	0.43204	0.210465	0.359401	0.147313	0.161328	0.175845	0.360606	0.309172	0.351389	0.317055	0.410507	0.367962	0.402905	0.182355	0.421306	0.358588	0.415534	0.404274	0.461075	0.191463	0.420055	0.0955935	0.34479	0.249939
TGTTGCAA	0.267427	0.103007	0.34175	0.24053	0.466868	0.375308	0.48851	0.481454	0.456926	0.48163	0.470307	0.44735	0.481259	0.442664	0.465213	0.42731	0.442718	0.370514	0.373123	0.310521	0.482461	0.439274	0.460891	0.337072	0.474146	0.331507	0.484631	0.453099	0.485433	0.333785	0.491328	0.477504	0.453561	0.392324	0.493115	0.490768	0.493738	0.484053	0.450229	0.423911	0.443607	0.370669	0.439667	0.358955	0.498458	0.49654	0.499443	0.498254	0.1698
ATGTTGCA	0.156061	0.088424	0.240389	0.35458	0.474541	0.396911	0.495908	0.492874	0.439104	0.491342	0.466846	0.449134	0.492418	0.477581	0.472475	0.413111	0.445607	0.471928	0.340077	0.361313	0.406098	0.450026	0.394534	0.309909	0.447882	0.339925	0.438935	0.465657	0.448665	0.329733	0.476001	0.477087	0.394723	0.430244	0.486295	0.493944	0.485153	0.487406	0.423401	0.452741	0.348084	0.394079	0.42799	0.328421	0.498183	0.496115	0.48865	0.481941	0.185766
GTTGCAAC	0.249139	0.016805	0.28217	0.249591	0.44996	0.418324	0.484486	0.483671	0.471747	0.465106	0.46266	0.432481	0.485639	0.445683	0.434607	0.437916	0.38797	0.366524	0.324767	0.321116	0.39539	0.379581	0.378076	0.30608	0.410878	0.285055	0.456601	0.412624	0.445736	0.227078	0.472706	0.389239	0.241449	0.28635	0.483287	0.474598	0.473447	0.418826	0.414339	0.201212	0.373456	0.320044	0.406173	0.326074	0.494339	0.463969	0.490034	0.487916	0.0764817
TGCAACAA	0.168927	0.149552	0.301807	0.248738	0.398351	0.340346	0.475555	0.464432	0.393927	0.448327	0.420901	0.398408	0.46998	0.447046	0.419135	0.373502	0.306956	0.377776	0.214849	0.321768	0.393353	0.427331	0.266336	0.239874	0.381673	0.302516	0.439067	0.429215	0.429354	0.167583	0.466356	0.437238	0.275179	0.367835	0.478969	0.477354	0.464035	0.452297	0.427912	0.399254	0.342666	0.324809	0.431082	0.320728	0.493561	0.433021	0.485048	0.477548	0.245846
ACGTTGCA	0.000920903	0.0348307	0.135768	0.119275	0.349238	0.248754	0.449707	0.403038	0.28706	0.409317	0.387255	0.336084	0.431056	0.382111	0.371864	0.23883	0.278916	0.308362	0.330709	0.0113488	0.264572	0.225875	0.303554	0.152264	0.334037	0.107219	0.301563	0.188868	0.321944	0.242484	0.405223	0.221275	0.271886	0.106698	0.385872	0.30229	0.40289	0.270547	0.333019	0.17848	0.341506	0.140161	0.327487	0.205937	0.464933	0.29185	0.477325	0.439331	-0.0221205
ATGCAACA	0.0488332	0.0134696	0.0131085	0.230832	0.309548	0.412738	0.465426	0.478438	0.376122	0.408422	0.289889	0.361918	0.416537	0.436845	0.352946	0.427459	0.192188	0.378354	0.0620226	0.274142	0.214464	0.397893	0.0472462	0.347469	0.17899	0.315283	0.354096	0.399316	0.317354	0.237369	0.380604	0.413006	0.0773466	0.33398	0.398627	0.470068	0.363164	0.446973	0.276456	0.384043	0.171681	0.364908	0.312497	0.39044	0.48732	0.475986	0.485004	0.486234	0.173534
GTGTTGCA	-0.0175575	-0.00107763	0.0944004	-0.0553845	0.309643	0.278839	0.467448	0.467097	0.294916	0.399978	0.350295	0.270512	0.413134	0.394953	0.390813	0.334201	0.352183	0.280817	0.0717012	0.198135	0.254919	0.177592	0.173324	0.188727	0.242372	0.115188	0.333112	0.168124	0.293267	0.151944	0.389932	0.314889	0.300638	0.110546	0.378669	0.461463	0.342708	0.392341	0.210424	0.299174	0.194046	0.231172	0.307918	0.28377	0.461993	0.435307	0.457027	0.470235	-0.156384
AGTTGCAA	0.0489708	0.0185574	0.259121	0.280582	0.332699	0.31996	0.459087	0.453929	0.361123	0.413589	0.400784	0.417653	0.446586	0.417628	0.37009	0.320338	0.241452	0.225529	0.235462	0.280093	0.368183	0.341122	0.343876	0.248649	0.366358	0.260915	0.41426	0.348886	0.425781	0.20872	0.454344	0.399825	0.227782	0.237629	0.432702	0.439388	0.441154	0.405192	0.308389	0.265407	0.293517	0.240231	0.322993	0.242084	0.472815	0.416619	0.483597	0.486979	0.107958
ATTGCAAC	0.125697	-0.00635989	0.180421	0.229921	0.2038	0.198751	0.41148	0.384677	0.338923	0.311074	0.378052	0.246791	0.346887	0.261459	0.280172	0.278011	0.154651	0.191618	0.221918	0.158807	0.288022	0.336208	0.282871	0.163523	0.277012	0.191721	0.398971	0.389854	0.428917	0.259468	0.447071	0.436682	0.260369	0.18556	0.348572	0.445975	0.412026	0.417316	0.27839	0.327318	0.277446	0.264408	0.23961	0.272396	0.485211	0.436591	0.49107	0.495364	0.0486347
GTTGCAAA	0.108003	0.201551	0.156628	0.315222	0.346997	0.253525	0.446423	0.447289	0.348967	0.389435	0.301497	0.356135	0.380329	0.385331	0.394493	0.259255	0.325367	0.27166	0.19875	0.195577	0.405703	0.3547	0.292126	0.170147	0.37566	0.242695	0.361144	0.370742	0.444815	0.153202	0.434164	0.439849	0.342439	0.280898	0.415028	0.451426	0.414103	0.447333	0.281644	0.299242	0.329634	0.293105	0.226734	0.135599	0.466067	0.43909	0.493139	0.492972	0.283543
TGTATAAA	0.238701	0.0058289	0.271331	0.314057	0.196607	0.287683	0.34887	0.346532	0.289657	0.28772	0.342859	0.299876	0.283549	0.32718	0.252883	0.289952	0.202901	0.227126	0.364108	0.341627	0.263628	0.332182	0.325534	0.375314	0.345285	0.363778	0.275571	0.370864	0.237091	0.299794	0.368249	0.341916	0.335157	0.329248	0.324214	0.429026	0.402973	0.430606	0.425426	0.458632	0.300782	0.386601	0.41342	0.353256	0.10023	0.180731	0.452354	0.45535	0.251605
GTTACAAA	0.304995	0.164444	0.363844	0.3461	0.235735	0.212029	0.268547	0.302781	0.280169	0.299793	0.307756	0.233342	0.32863	0.294338	0.296947	0.162883	0.110151	0.160854	0.385288	0.237991	0.451722	0.406972	0.419249	0.263052	0.433736	0.232024	0.452359	0.378427	0.476701	0.280017	0.47512	0.45091	0.409938	0.338152	0.419274	0.400837	0.414584	0.378501	0.383697	0.307698	0.354094	0.279264	0.337919	0.112502	0.283576	0.0954991	0.471838	0.466217	0.243242
ATGCTACA	0.0292531	-0.0396839	0.101455	0.00329739	0.180251	0.191837	0.201334	0.238441	0.0843332	0.12837	0.126057	-0.016915	0.0740878	0.0654531	0.174006	0.174408	0.167817	-0.0547285	0.0910448	0.141354	0.408319	0.371358	0.261575	0.231553	0.325158	0.229352	0.380239	0.255571	0.444274	0.177535	0.415758	0.376964	0.321258	0.22527	0.280599	0.359403	0.407495	0.371895	0.176869	0.327171	0.147758	0.192355	0.221399	0.247289	0.177814	0.306332	0.467247	0.468816	0.144822
ATTGCTAC	0.159693	0.0195546	0.223911	0.202308	0.0271135	0.276862	0.132576	0.271726	0.359923	0.0542865	0.0136838	0.307394	-0.0684681	0.190165	0.104297	0.297544	0.0556986	0.189083	0.084153	0.258382	0.397	0.383887	0.291664	0.330839	0.361299	0.347583	0.367241	0.383081	0.468602	0.341122	0.452441	0.447967	0.31491	0.398827	0.290324	0.432431	0.406452	0.436399	0.231988	0.359322	0.278958	0.303081	0.0896765	0.190859	0.25714	0.183984	0.478621	0.482787	0.131874
GTAGCAAA	0.262452	0.12639	0.112468	0.275313	0.181307	0.190383	0.202651	0.137367	0.126599	0.227233	0.241101	0.237174	0.117904	0.0863799	0.162897	0.165079	0.0701655	0.116073	0.310876	0.0740385	0.381693	0.369016	0.37523	0.273538	0.366186	0.295494	0.36127	0.338636	0.467815	0.3492	0.445889	0.437403	0.316417	0.269957	0.311849	0.39842	0.415404	0.412971	0.296383	0.266061	0.194138	0.349308	0.1389	0.261161	0.236269	0.248657	0.473818	0.478015	0.206733
AAAATTCT	0.0389123	-0.0588857	0.405906	0.356272	0.0199085	-0.00480207	0.0770612	0.0523237	0.191093	0.0869476	0.157742	0.29121	0.0338948	0.104359	0.130683	0.0302351	0.0864248	0.0865492	0.32684	0.216573	0.183403	0.0916381	0.18934	0.058436	0.193382	0.12737	0.162531	0.0577206	0.0106424	-0.00348388	0.267174	0.19377	0.241512	0.0840004	0.108767	0.0815128	0.218668	0.207536	0.21161	0.215422	0.20088	0.199043	0.169019	0.0209827	-0.0511867	-0.0730356	0.315187	0.451934	0.367434
GTTGCATA	0.0430757	-0.0975297	0.038943	0.0293796	0.137953	0.355191	0.334867	0.401115	0.374487	0.244564	0.286167	0.345133	0.278803	0.348908	0.215714	0.34299	-0.191721	0.199599	0.115883	0.101083	-0.119111	0.21257	0.0781988	0.236163	0.0352917	0.21766	0.0893516	0.196083	-0.0120625	0.0375109	0.187732	0.302977	-0.0499736	0.103139	0.194634	0.353478	0.18911	0.301266	0.131478	0.235632	0.0459752	0.181534	0.222047	0.242099	0.388466	0.337989	0.423462	0.458232	-0.0314248
CGTAGCAA	0.251928	-0.0489164	-0.0845756	0.194907	0.00901748	0.219736	-0.0239115	0.253638	0.289255	0.0753723	0.128007	0.310232	0.0944038	0.233163	0.0722386	0.262013	0.0276293	0.200892	0.0117836	0.180477	0.17856	0.261718	0.236247	0.202929	0.142776	0.26087	0.0111124	0.241976	0.330991	0.219387	0.270244	0.337195	0.0964813	0.190494	0.0285139	0.358189	0.112955	0.359846	-0.0212151	0.313841	-0.0130417	0.279573	-0.0898741	0.233891	0.0293275	0.272508	0.39913	0.467281	0.184544
CTGTTAAA	0.109906	0.177885	0.200174	0.283475	0.10818	-0.098095	0.123705	0.174509	0.088917	0.18367	0.198796	0.188454	0.209784	0.124731	0.202368	-0.0358803	0.0649009	0.0531339	0.166918	0.0911184	0.159546	0.000378828	0.25986	-0.0113114	0.202243	0.056836	0.214586	0.247789	0.13456	0.146986	0.183826	0.120093	0.236999	0.186414	0.1405	0.0424918	0.193789	0.15639	0.21383	0.108464	0.187943	0.0334715	0.216643	0.0268746	0.065586	0.0075115	0.417183	0.465177	0.117492
AATTTCAA	0.0950264	0.267179	0.407367	0.372231	0.306657	0.19116	0.19531	0.206006	0.3169	0.227981	0.205813	0.32123	0.267879	0.219962	0.229606	0.257097	0.144538	0.13383	0.329375	0.214713	0.275156	0.325465	0.299763	0.254299	0.299884	0.297704	0.261672	0.284838	0.260272	0.275693	0.296824	0.334147	0.32702	0.31975	0.237431	0.16347	0.259008	0.29575	0.279218	0.233486	0.331453	0.212263	0.294413	0.179879	0.151621	0.223641	0.455739	0.4103	0.412571
ATTTTGAC	0.24025	0.36618	0.421915	0.336685	0.165762	0.236968	0.245154	0.167326	0.111545	0.219437	0.190419	0.153257	0.0861723	0.130097	0.259098	0.170585	0.268136	0.135125	0.234799	0.184505	0.357141	0.207639	0.34926	0.200242	0.305274	0.211865	0.306424	0.216638	0.282317	0.2581	0.329657	0.228006	0.338845	0.231427	0.221912	0.168765	0.340001	0.283265	0.279856	0.208609	0.248542	0.217336	0.273795	0.245456	0.143345	0.106483	0.465441	0.424302	0.407577
AATTTTAA	0.0740998	0.209397	0.427505	0.418326	0.251074	0.126779	0.259329	0.140634	0.19975	0.270879	0.201823	0.326474	0.150873	0.155476	0.303763	0.0529587	0.0524743	0.0817114	0.180456	0.232845	0.204398	0.280212	0.369613	0.186293	0.38436	0.242823	0.283356	0.272437	0.222501	0.180048	0.287622	0.293494	0.283164	0.219497	0.0724838	0.216555	0.319511	0.30161	0.233379	0.306369	0.100168	0.322564	0.22308	0.125506	0.141854	0.0195872	0.453005	0.456185	0.382219
TATTTTAA	0.264033	0.225437	0.404557	0.398161	0.247243	0.170915	0.251991	0.313579	0.122329	0.259514	0.315737	0.239388	0.293422	0.353899	0.217354	0.204308	0.143223	0.30589	0.347524	0.334783	0.342847	0.310271	0.354509	0.230548	0.393231	0.283104	0.339461	0.267622	0.305818	0.0390615	0.378843	0.344101	0.347945	0.318222	0.331514	0.316314	0.404511	0.381043	0.39394	0.374984	0.284598	0.362251	0.359724	0.198659	0.229946	0.216564	0.452851	0.451181	0.363076
TGTACAAA	0.202027	0.106975	0.345321	0.171479	0.348363	0.235778	0.313953	0.23821	0.254124	0.355386	0.39027	0.298787	0.340309	0.267334	0.33417	0.252487	0.176021	0.106933	0.38741	0.244531	0.284115	0.159491	0.378601	0.281389	0.32509	0.27406	0.360911	0.258078	0.259049	0.317598	0.295563	0.208798	0.293279	0.160085	0.347984	0.307616	0.399854	0.31657	0.358124	0.295292	0.39793	0.297812	0.432619	0.35367	0.259748	0.217294	0.479262	0.457718	0.186605
ATGCAACG	-0.0556287	0.0878053	0.143563	-0.165758	0.185437	0.250327	0.25082	0.245422	0.149955	0.298094	0.325175	0.21192	0.236763	0.155281	0.23402	0.293523	0.180476	0.22624	0.319415	0.0671598	0.0886813	-0.139794	0.26181	0.13663	0.199875	0.109419	0.238541	0.00854654	0.106	0.0650241	0.244605	0.0455399	0.162778	0.0217243	0.322675	0.15905	0.259745	0.0557236	0.230966	0.0334	0.219422	0.0752852	0.332839	0.202658	0.38708	0.261912	0.4515	0.421596	-0.127409
AGTAGAAA	0.0104457	0.123666	0.247522	0.0890987	0.187679	0.226286	0.209291	0.178584	0.088834	0.263868	0.154175	0.260187	0.256762	0.165828	0.191164	0.198442	0.0925268	0.133601	0.257099	0.0999912	0.189116	0.124896	0.268419	0.189127	0.1228	0.107787	0.10609	0.182929	0.20995	0.222076	0.254164	0.102272	0.165691	0.147103	0.107915	0.137847	0.22227	0.12765	0.23918	0.0915475	0.182699	0.227992	0.130558	0.161871	0.0205482	0.0455042	0.450097	0.407715	0.0701652
TGTAAAAA	0.297646	0.184076	0.332566	0.317441	0.186361	0.214028	0.214052	0.242234	0.239985	0.237139	0.154176	0.259685	0.228403	0.254515	0.198428	0.168725	0.114819	0.243221	0.284056	0.30976	0.280362	0.256394	0.251681	0.215559	0.30912	0.256713	0.237285	0.254595	0.163398	0.128663	0.223842	0.193713	0.263921	0.264472	0.311846	0.303432	0.304792	0.336925	0.318541	0.325933	0.176723	0.334799	0.307237	0.14724	0.101498	0.0287243	0.465123	0.437723	0.321598
CTGTTGAA	0.0434473	-0.0263864	0.0719747	0.144014	0.0332142	0.138652	0.179702	0.284388	0.276644	0.144471	0.17339	0.237546	0.0806137	0.198953	0.162822	0.165502	0.207639	0.140475	0.113079	0.0477378	-0.00232856	0.186649	0.0415089	0.13248	0.0566396	0.189352	0.0220614	0.22124	-0.00202109	0.0725818	0.107925	0.0854402	0.122167	0.14947	0.189343	0.12251	0.081094	0.177311	0.143458	0.151873	0.143154	0.174896	0.177981	0.137839	0.13449	0.099933	0.478405	0.448155	0.126786
CGTCGAAA	0.33436	0.146671	0.148888	0.279275	0.103623	0.144849	0.0842183	0.263551	0.174648	0.163179	0.165832	0.0850427	0.259615	0.289681	0.0568448	0.204042	0.0942179	0.267661	0.133435	0.329878	0.0950779	0.123033	0.081506	0.157645	0.139297	0.223586	0.0317246	0.162942	0.0722488	0.110937	0.0891331	0.157015	0.00552785	0.200671	0.0559601	0.12374	0.0170688	0.181668	0.119194	0.284373	0.210589	0.230199	0.0835515	0.119451	0.113232	0.168539	0.473975	0.451043	0.264091
AAGTTGAA	0.0691087	0.045546	0.379612	0.301015	0.203006	0.146738	0.278663	0.193008	0.312413	0.258415	0.28447	0.331788	0.344188	0.215892	0.23855	0.130814	0.166544	0.179721	0.338491	0.0610315	0.269407	0.171293	0.207121	0.158843	0.206954	0.161187	0.221037	0.192652	0.193202	0.202196	0.32533	0.28832	0.291198	0.204706	0.263543	0.208491	0.301945	0.201341	0.298959	0.105813	0.267111	0.19278	0.262342	0.163844	0.103515	-0.0418655	0.461307	0.415961	0.156142
AATTTAAC	-0.0914727	0.0376229	0.395733	0.362018	0.225571	0.010945	0.147788	-0.0228125	0.214579	0.128112	0.282691	0.173312	0.196614	-0.0167361	0.180197	0.033108	0.17222	-0.0616484	0.306497	-0.00762246	0.24857	-0.0208718	0.268814	0.032419	0.310373	0.114753	0.340757	0.210236	0.21074	-0.0866602	0.291492	0.0205214	0.254693	0.000107312	0.239671	0.0522989	0.291475	0.110592	0.284377	0.13889	0.266795	-0.013218	0.286905	0.138732	0.118003	-0.017904	0.458738	0.431018	0.207075
ACGTTGAA	0.133458	0.0982683	0.174374	0.0807347	0.175574	0.211669	0.247129	0.24402	0.0668007	0.264081	0.115408	0.0452333	0.247842	0.0853682	0.200001	0.124093	0.15752	0.181436	0.09803	0.0889608	0.126104	0.188585	0.13216	0.156562	0.127324	0.160314	0.0882062	0.0923637	0.131544	0.0598461	0.150727	0.158186	0.162756	0.111219	0.243399	0.130274	0.132627	0.167648	0.176487	0.0984146	0.124697	0.185817	0.163243	0.210856	0.186435	0.0799683	0.462489	0.377182	0.171324
TGTCGCAA	0.169488	0.0640089	0.0100112	0.0499618	0.00848453	0.117689	0.100392	0.114422	0.115867	-0.0185665	0.0952875	0.17866	0.182007	0.187627	0.0109127	0.155967	0.0739543	0.129052	-7.14e-05	0.128742	0.227277	0.280786	0.0785802	0.142102	0.167452	0.0998754	0.201654	0.268547	0.372455	0.193305	0.33894	0.357422	0.13188	0.155545	0.295042	0.311114	0.309977	0.325288	0.145401	0.276589	0.215427	0.0793107	0.158096	0.241207	0.228397	0.290297	0.452916	0.406184	0.0472074
CTGTTGCA	-0.0631351	-0.107366	-0.116115	-0.0048561	0.202317	0.275874	0.428223	0.432019	0.375679	0.277842	0.210014	0.343711	0.345824	0.319202	0.28825	0.293342	0.0369997	0.182457	0.00636613	-0.0171186	0.161716	0.254805	0.077027	0.197288	0.0786614	0.173423	0.324866	0.368378	0.27694	0.188515	0.2755	0.319829	0.0499862	0.193107	0.332159	0.411158	0.266664	0.357679	0.069349	0.206193	0.125026	0.230406	0.120051	0.224462	0.404886	0.375842	0.475335	0.474938	0.00237293
AATGCAAC	0.0321051	0.141211	0.194488	-0.0609929	0.258948	0.235829	0.382772	0.299255	0.140199	0.365145	0.297457	0.261227	0.33872	0.27586	0.245631	0.279692	0.261178	0.109862	0.185037	0.0710669	0.228212	0.124142	0.203116	0.154051	0.169219	0.217061	0.301387	0.235601	0.28791	0.10249	0.333819	0.258031	0.194543	0.104893	0.322178	0.335251	0.292688	0.267704	0.273008	0.18236	0.288538	0.199478	0.305276	0.248958	0.444176	0.369921	0.480697	0.475325	-0.00842578
CGTTGCAA	0.119125	-0.00315455	0.0354014	0.153266	0.299418	0.224483	0.422224	0.347195	0.250262	0.32122	0.339442	0.12127	0.360398	0.286787	0.340436	0.267853	0.183587	0.201685	0.180007	0.13982	0.165187	0.197354	0.236509	0.135179	0.248035	0.09473	0.282261	0.173768	0.323835	0.151451	0.334769	0.308211	0.147028	0.258813	0.30861	0.35744	0.333147	0.309995	0.187125	0.177169	0.277048	0.16773	0.226385	0.200383	0.428714	0.36506	0.488054	0.488511	0.0677029
CTTGCAAC	-0.1065	-0.0154206	0.139475	0.000756856	0.227837	0.22623	0.420291	0.276879	0.227762	0.312679	0.212478	0.193985	0.377431	0.22717	0.315095	0.282837	0.182277	0.110526	0.0880784	0.0135835	0.217705	0.0205645	0.160642	0.192741	0.189408	0.115114	0.293085	0.105368	0.345368	0.171598	0.353285	0.283132	0.200902	0.172113	0.346911	0.278792	0.325831	0.233895	0.17972	0.0923921	0.150508	0.0845069	0.175249	0.210323	0.377684	0.381089	0.483569	0.479034	-0.123284
ATTTTAAC	0.272309	0.214873	0.449925	0.379274	0.262315	0.146381	0.199713	0.197592	0.160232	0.252143	0.239215	0.119313	0.234305	0.286162	0.285607	0.118201	0.060852	0.231015	0.24458	0.254867	0.239393	0.300752	0.327452	0.251474	0.357678	0.275888	0.328004	0.242105	0.286147	0.17582	0.306568	0.3002	0.264535	0.312752	0.164043	0.218219	0.337022	0.299018	0.248696	0.284212	0.188031	0.318185	0.276203	0.134513	0.138756	0.141795	0.491133	0.491031	0.327604
GTTAAAAC	-0.0613159	0.0707782	0.277989	0.124548	0.339478	-0.00835634	0.373765	0.106522	-0.134872	0.387772	0.283255	0.0501558	0.371493	0.225559	0.390256	0.0194777	0.282145	-0.0494858	0.246122	0.0223871	0.298688	-0.0323634	0.239371	0.00634366	0.288799	-0.0259418	0.289939	-0.0590666	0.217104	0.100528	0.282402	0.0523456	0.229381	-0.0181989	0.208163	0.0503281	0.300372	0.0302468	0.19914	0.0558959	0.271484	0.0394042	0.259915	-0.0160909	0.149802	-0.0754206	0.457343	0.453189	0.069408
ATGTTGAA	0.281812	0.146986	0.316316	0.253249	0.319166	0.362882	0.409957	0.412317	0.360605	0.364551	0.335821	0.356643	0.40217	0.390986	0.384534	0.362247	0.142888	0.316201	0.356761	0.240882	0.175738	0.210377	0.291057	0.315426	0.299075	0.305435	0.258963	0.249951	0.212635	0.313511	0.282321	0.210047	0.222917	0.174287	0.265738	0.295602	0.325133	0.30269	0.334056	0.321292	0.223671	0.352111	0.35867	0.379039	0.167489	0.30406	0.487273	0.481857	0.225793
ATGTCGAA	0.197268	0.104783	0.14816	0.152044	0.132851	0.166445	0.239606	0.205928	0.145653	0.26821	0.197006	0.0786662	0.213495	0.173721	0.118879	0.188629	0.215466	0.116544	0.12767	0.114481	0.0903302	0.194617	0.158152	0.209519	0.128886	0.18921	0.132468	0.07164	0.13838	0.17883	0.143241	0.128204	0.157337	0.133211	0.172137	0.170469	0.191163	0.219194	0.160349	0.171426	0.212536	0.146624	0.259932	0.1793	0.113857	0.155193	0.45236	0.469615	0.0710196
ATTCGACA	0.0341971	0.0653582	0.0738463	0.24646	0.0978863	0.148329	0.0263823	0.147322	0.16833	0.120936	0.179913	-0.0397065	0.124388	0.100276	0.00319709	0.141757	0.150559	0.148503	-0.0194452	-0.00377875	0.0610414	0.190835	0.094788	0.184965	0.143281	0.190013	0.0978411	0.206385	0.192378	0.203782	0.168036	0.226105	0.177688	0.171239	0.108246	0.117375	0.14693	0.183224	0.0900377	0.214383	0.0796505	0.240984	0.117445	0.0159551	0.0311286	-0.00948374	0.434867	0.458491	0.0914016
ATTTCTAC	0.205209	0.00840448	0.129564	0.293653	0.0569203	0.315754	0.054943	0.153697	0.226479	0.118601	0.0413697	0.146635	0.0737682	0.178924	0.0975347	0.298804	-0.0062244	0.147964	0.158359	0.147713	0.027998	0.215395	-0.0476879	0.324483	0.0895007	0.317284	-0.0178996	0.23816	-0.0224184	0.224441	0.127645	0.255763	0.093519	0.165803	0.0447861	0.251211	0.0664245	0.292457	0.0913675	0.279395	0.110675	0.295472	0.133178	0.311268	0.0724552	0.21885	0.448973	0.470839	0.218376
GTTGAATA	0.271388	0.187563	0.127121	0.319019	0.248176	0.19794	0.164577	0.320446	0.3233	0.228005	0.30136	0.332503	0.0805675	0.295881	0.179989	0.241808	0.14592	0.26081	0.359383	0.279763	0.182866	0.29645	0.235891	0.224725	0.219751	0.27101	0.216938	0.336863	0.158614	0.142052	0.236894	0.298397	0.205432	0.261763	0.264872	0.275839	0.202085	0.326249	0.26549	0.268047	0.195966	0.280418	0.302205	0.157416	0.14567	0.0914522	0.467667	0.477576	0.287642
TTCAACAA	0.237542	0.216231	0.247327	0.325922	0.27019	0.329469	0.29451	0.286192	0.346173	0.239558	0.239487	0.375425	0.270741	0.293069	0.289958	0.284513	0.0546938	0.144399	0.115815	0.243095	0.12788	0.180365	0.184576	0.320048	0.152705	0.334266	0.0503661	0.31744	0.0448555	0.277976	0.150346	0.328535	0.185494	0.245677	0.178844	0.361089	0.190937	0.346085	0.138925	0.348541	0.234281	0.318801	0.251981	0.302498	0.111344	0.181134	0.477401	0.487297	0.317295
TTGTTAAA	0.276401	0.080829	0.328922	0.378671	0.201488	0.182877	0.230568	0.35177	0.217449	0.248163	0.323221	0.222094	0.263143	0.29575	0.267083	0.198623	0.152765	0.288121	0.206077	0.360678	0.254438	0.337323	0.228196	0.260484	0.301653	0.32276	0.284037	0.366127	0.268599	0.0311344	0.322329	0.377226	0.272619	0.316594	0.216618	0.387892	0.290101	0.389013	0.214303	0.37059	0.230661	0.354377	0.304024	0.193443	0.0727282	0.154189	0.465976	0.463983	0.378111
AATGCTAC	-0.126761	0.00584993	0.109792	0.147801	-0.0595365	0.0142024	-0.016673	0.0872506	-0.0111081	-0.099518	0.0219488	-0.0695598	-0.154363	-0.0749275	-0.209098	-0.0341091	0.0620647	0.0381337	0.0289533	0.107415	0.287963	0.305066	0.143883	0.0570514	0.23766	0.0811738	0.278465	0.197681	0.393217	0.0809552	0.337848	0.333676	0.219835	0.193563	0.182626	0.15458	0.297522	0.223162	0.162785	0.148435	0.0789292	-0.0472197	0.133391	-0.0431391	0.149946	0.0716989	0.465965	0.46988	0.0276478
ATGTTAAA	0.278269	0.039869	0.342735	0.35146	0.251791	0.217843	0.336788	0.278589	0.212976	0.296138	0.229269	0.280916	0.217217	0.299927	0.305407	0.205239	0.225415	0.236762	0.14146	0.34323	0.207408	0.258572	0.235291	0.25491	0.338881	0.311268	0.201666	0.302578	0.152876	0.179159	0.293012	0.275074	0.278519	0.276219	0.269371	0.297234	0.330358	0.320515	0.293741	0.311587	0.283983	0.261033	0.340449	0.162603	0.176106	0.0889462	0.470776	0.460258	0.20445
TGTGGAAA	0.238146	-0.0453692	0.190695	0.2774	0.0550652	0.162089	0.148793	0.115789	0.148365	0.113761	0.219762	0.166799	0.131027	0.150088	0.111737	0.274562	-0.0294685	0.222979	0.037469	0.169755	-0.0190214	0.182068	0.079196	0.140064	0.120159	0.191614	0.0225284	0.159782	0.0555518	0.169706	0.0341711	0.168848	0.102637	0.164469	0.0625993	0.0911145	0.138072	0.174206	0.0451484	0.0803958	0.0233013	0.214979	0.121679	0.134822	-0.0704297	0.119625	0.471034	0.452429	0.263783
CTTTTAAC	0.150545	0.315413	0.267742	0.165162	0.141222	-0.140894	0.0572872	0.110269	-0.118776	0.0957526	0.0708111	-0.115181	0.0753282	0.0892631	0.0821368	-0.117005	0.12053	0.174824	0.127012	0.104744	0.18848	0.0405713	0.200858	-0.0714036	0.229858	0.0834227	0.187688	0.16162	0.242022	-0.119997	0.262072	0.127716	0.273107	0.130286	0.0323004	-0.00766461	0.192389	0.0829446	0.145217	0.201391	0.0622228	0.232872	0.123117	-0.211976	0.0620266	-0.116749	0.476152	0.463638	0.114191
GGTTGCAA	-0.103245	0.0752637	0.0368889	0.0810968	0.0492217	0.0574053	0.240211	0.226797	0.213338	0.0921823	0.0504951	0.0729378	0.183626	0.0896966	0.174278	0.127094	0.155438	-0.0658912	0.121465	-0.194692	0.128274	0.040648	-0.00950352	-0.0196996	0.167379	-0.0864266	0.122173	0.228599	0.250939	0.0771085	0.256177	0.184859	0.0424433	-0.0887667	0.114292	0.212555	0.107656	0.114814	0.0527454	-0.168403	0.0389086	-0.0547124	-0.0422978	0.0188359	0.218904	0.1726	0.474494	0.460062	-0.173993
GTCAAAAA	0.296831	0.129797	0.268588	0.313496	0.0768091	0.10188	0.0346738	0.0313898	0.0832033	0.215413	0.197898	0.125559	0.149212	0.0761013	0.140252	0.125684	0.0679485	0.0955183	0.187227	0.239833	0.0912063	0.17207	0.106668	0.137155	0.191677	0.199294	0.0953453	0.0681905	0.096015	-0.0360518	0.124009	0.137439	0.103065	0.0909491	0.0154853	0.169937	0.109164	0.168676	0.127327	0.216105	0.100758	0.202182	0.121167	0.158168	-0.0397121	0.110568	0.463305	0.459113	0.350978
AGTTGAAA	-0.0132555	0.240247	0.30941	0.101316	0.261199	0.095822	0.28352	0.224466	0.214495	0.283116	0.233695	0.254248	0.320322	0.164362	0.232657	0.0704513	0.0826667	0.18715	0.333905	0.0579057	0.207831	0.11386	0.159422	0.0235843	0.168303	0.0749919	0.215212	-0.0032533	0.219155	0.132655	0.297861	0.167435	0.194365	0.0795848	0.227398	0.123599	0.235676	0.109703	0.296898	0.0189104	0.217461	0.0126298	0.285619	0.0811289	0.151426	-0.0623432	0.490749	0.480609	0.0992405
GTAGAAAA	0.152964	0.279376	0.184154	0.322691	0.149184	0.0329504	0.00649687	0.109716	0.19638	0.12916	0.0791757	0.272792	0.0978295	0.178415	0.149501	-0.0117559	0.0312176	0.151598	0.188931	0.144873	0.139061	0.231801	0.171182	0.106876	0.0661035	0.22401	0.0956939	0.147693	0.100375	0.161596	0.130616	0.138736	0.162399	0.214605	-0.0552628	0.114776	0.171585	0.19436	0.114996	0.153218	0.0704589	0.225076	0.0384743	-0.0283196	0.0568506	0.0606698	0.480117	0.470661	0.339695
TGTCCAAA	0.134377	0.264991	0.233976	0.203544	0.279271	0.216446	0.185368	0.143418	0.176051	0.178444	0.257476	0.162583	0.206037	0.175971	0.217805	0.15739	0.194568	0.117423	0.224651	0.197954	0.182835	0.131203	0.243752	0.209235	0.221613	0.191557	0.160583	0.175051	0.22014	0.288479	0.161513	0.201398	0.114024	0.21135	0.105766	0.113939	0.177136	0.174214	0.16711	0.126756	0.0575235	0.170362	0.165097	0.23835	0.118605	0.166074	0.47379	0.466752	0.279079
CTTTCAAC	0.218196	0.186209	0.091982	-0.0730165	0.0433023	-0.127572	0.243003	0.037874	-0.0640719	0.14676	-0.0644635	-0.0992726	0.140769	-0.0158009	0.118897	-0.0739568	0.0733427	0.12112	0.0786406	0.0739321	0.124857	-0.114327	-0.0565024	-0.116494	0.0468753	0.0318859	0.0682726	-0.114691	-0.00873237	0.0161291	0.150055	-0.0270726	0.0779024	0.123733	0.0908911	-0.0437035	0.106981	0.027147	0.0880371	-0.0702892	0.150097	-0.0152853	0.160311	-0.131426	0.093619	-0.0303814	0.48618	0.477435	0.105288
TGTCAAAA	0.340041	0.183671	0.253092	0.359763	0.120846	0.218196	0.21267	0.142115	0.181819	0.195309	0.187513	0.234434	0.114261	0.034269	0.12829	0.273997	0.072737	0.164586	0.12726	0.241988	0.207976	0.216178	0.250846	0.219945	0.294936	0.234589	0.258837	0.2269	0.281939	0.249705	0.225123	0.274189	0.273485	0.188207	0.139115	0.294948	0.231507	0.335921	0.22145	0.286333	0.195541	0.324381	0.227442	0.284305	-0.0217497	0.166086	0.482645	0.487831	0.365102
ATTTCGAC	0.339271	0.110069	0.151286	0.301339	0.0315227	0.261921	0.0223207	0.237391	0.224523	0.108294	0.1083	0.219787	0.135429	0.216552	-0.0284094	0.25404	-0.0332105	0.194985	0.153454	0.239871	0.0392559	0.277961	0.0618788	0.291283	0.0160374	0.316477	-0.0658101	0.281552	-0.0658188	0.156416	0.133833	0.255305	0.00762165	0.271369	0.0774498	0.248441	0.0842459	0.252589	0.159913	0.332748	0.166735	0.269103	0.19709	0.278411	0.0636163	0.301455	0.480832	0.486473	0.322894
CGTTGAAA	0.220018	0.061562	0.0992271	0.207928	0.140142	0.175975	0.210119	0.280548	0.220596	0.206876	0.113476	0.187335	0.257979	0.216459	0.137436	0.219114	0.0755335	0.319427	0.0747824	0.170688	0.083412	0.180114	0.00309881	0.116846	0.0500341	0.185186	0.0843709	0.224917	0.0346733	0.223403	0.106673	0.173522	0.154625	0.230393	0.152045	0.131576	0.108223	0.199866	0.125787	0.149281	0.145536	0.277173	0.084798	0.192275	0.099291	0.183149	0.486039	0.489481	0.179592
TGTCGAAA	0.274385	0.176502	0.13212	0.334058	0.226616	0.203971	0.233342	0.308185	0.18481	0.269322	0.253464	0.234018	0.256467	0.240347	0.159865	0.148939	0.211992	0.221015	0.235692	0.233022	0.176205	0.300679	0.187298	0.236987	0.172352	0.313461	0.155926	0.28998	0.149563	0.0456119	0.203284	0.318734	0.159178	0.305652	0.147153	0.281173	0.191299	0.307426	0.209554	0.283835	0.16907	0.201458	0.221556	0.164729	0.106697	0.261424	0.493638	0.496853	0.293266
ATTCAACA	0.196473	0.213086	0.313857	0.249416	0.353358	0.283731	0.338742	0.300219	0.329822	0.357458	0.230008	0.371417	0.259745	0.32598	0.351579	0.255979	0.13303	0.199843	0.287421	0.233629	0.218596	0.265476	0.320526	0.226048	0.329173	0.288712	0.280475	0.298301	0.223841	0.136846	0.241213	0.252132	0.274216	0.172325	0.273751	0.284608	0.293401	0.316172	0.273793	0.316569	0.229503	0.322572	0.328888	0.235694	0.204351	0.232542	0.48913	0.490522	0.274325
GGTTGAAA	-0.0508764	0.199516	0.154537	0.0534929	0.122591	-0.103716	0.27227	0.121611	-0.00985738	0.34037	0.152967	0.0773046	0.232631	0.0570915	0.24129	-0.0866222	0.180989	0.0763343	0.145291	-0.0834732	0.109681	-0.12652	0.0768952	-0.21261	0.0709181	-0.121183	0.0690863	0.0556659	0.131147	-0.15376	0.141603	-0.057115	0.173869	0.00155245	0.154304	0.00444108	0.0615107	-0.0041267	0.101378	-0.0597292	0.0390212	-0.0460494	0.0869682	-0.204915	0.0571472	-0.0982483	0.482785	0.479475	0.112617
GTCGAAAA	0.147526	0.269963	0.246703	0.260629	0.256674	-0.0173069	0.244632	0.0203434	0.242779	0.21981	0.129023	0.0577557	0.179842	0.161902	0.176423	0.0979811	0.22064	0.106006	0.204933	0.0825043	0.200597	-0.00544443	0.161557	0.0504069	0.197001	0.113886	0.136888	0.0118043	0.0468342	-0.0038605	0.168308	0.000989049	0.198233	0.00442253	0.121476	-0.0326949	0.192038	0.0308862	0.149125	0.0372101	0.260593	0.174293	0.155591	-0.0898614	0.135074	0.0273388	0.485963	0.48146	0.166644
ATTCTACA	0.109384	0.224225	0.247641	0.163929	0.225693	0.0500741	0.248949	0.214787	0.108598	0.220404	0.275166	0.0532682	0.262332	0.156713	0.214917	0.0543309	0.195087	0.0869273	0.293799	0.208418	0.190429	0.118365	0.232896	0.0493529	0.159098	0.129874	0.234319	-0.104239	0.204406	-0.0708096	0.210418	0.100823	0.177232	0.126559	0.221668	0.0898221	0.233693	0.166947	0.24668	0.121783	0.283424	0.0893696	0.312625	-0.00608233	0.202268	-0.0672737	0.452322	0.454278	0.233653
CGTTAAAA	0.19101	0.258366	0.346853	0.342672	0.176421	0.07918	0.299503	0.199096	0.172679	0.306968	0.193586	0.102993	0.334669	0.253369	0.277947	0.0656971	0.205582	0.209859	0.223037	0.18836	0.252729	0.161169	0.273497	0.154095	0.249447	0.237965	0.273254	0.217884	0.240165	0.00400209	0.284632	0.302968	0.265329	0.296695	0.202349	0.134732	0.324965	0.275655	0.227122	0.289946	0.21725	0.27122	0.258607	-0.0873859	0.0813549	0.0513098	0.487369	0.486447	0.288215
GTGTTGAA	0.0353177	-0.00702404	0.131688	-0.0345855	0.222834	0.150586	0.250491	0.184277	0.0203554	0.219799	0.228765	0.0248692	0.183565	0.245442	0.312079	0.135046	0.244061	0.123771	0.0380533	0.0163318	0.0583739	0.0806592	0.206867	-0.00239771	0.0724865	0.0373321	0.124325	0.146026	0.107004	-0.0600255	0.122033	-0.0537617	0.123495	0.0677647	0.166491	0.100319	0.112719	0.0414257	0.124377	0.123406	0.158461	0.0423978	0.23281	0.0942085	0.253118	0.124672	0.475348	0.474856	-0.0875186
GTTGAAAA	0.122789	0.0811123	0.281172	0.22169	0.217962	0.00423955	0.20993	0.163993	0.116636	0.247656	0.195637	0.252712	0.22075	0.131017	0.232835	0.0698347	0.0921346	0.154532	0.238675	0.0878014	0.0951288	0.0176878	0.122106	-0.00815015	0.163667	0.14016	0.125924	0.185974	0.0885811	0.083987	0.19085	0.107492	0.122505	0.116506	0.13704	0.15102	0.138313	0.222657	0.192058	0.163038	0.158216	0.189833	0.176824	0.0493678	0.106944	-0.0127487	0.496365	0.494404	0.21169
TGTTAAAA	0.184867	0.270168	0.310833	0.333201	0.213902	-0.0201982	0.205444	0.205019	0.0107615	0.253959	0.184889	-0.0261625	0.138343	0.234849	0.27758	-0.0359271	0.153613	0.22277	0.0799414	0.197778	0.290849	0.19462	0.286753	0.0845653	0.329537	0.167546	0.250187	0.0934323	0.268787	0.0281549	0.285712	0.180912	0.296156	0.192894	0.0643373	0.147535	0.288159	0.198795	0.161864	0.251553	0.263942	0.120144	0.250744	0.0561843	0.0431266	0.0580484	0.495702	0.496509	0.240399
AATTCAAC	0.117518	0.112081	0.216146	0.250156	0.0675948	0.264906	0.109245	0.159914	0.214535	0.197106	-0.0411919	0.254294	0.113503	0.251972	0.168481	0.224762	0.104234	0.139058	0.0599876	0.167193	0.149102	0.165559	0.061818	0.203326	0.142865	0.185169	0.101693	0.202303	0.0630626	0.238622	0.0998814	0.121781	0.178777	0.0596447	-0.00305165	0.215189	0.127267	0.234093	0.132654	0.207405	0.0665533	0.232593	0.0525231	0.292026	-0.0127713	0.10515	0.475773	0.476976	0.20964
ATTTCAAC	0.213157	0.166596	0.231725	0.273655	0.223208	0.2859	0.125293	0.196862	0.275462	0.203206	0.167075	0.246566	0.116111	0.245944	0.220771	0.248197	0.278969	0.245239	0.239125	0.169458	0.161883	0.316417	0.20692	0.282063	0.14934	0.266796	0.116437	0.181214	0.124294	0.264963	0.19526	0.255275	0.241105	0.18547	0.198566	0.160793	0.166884	0.235334	0.271119	0.243655	0.27523	0.251813	0.256168	0.284621	0.121182	0.233407	0.496467	0.497022	0.308626
TGTTGAAA	0.285361	0.104994	0.260017	0.29881	0.305523	0.296498	0.38811	0.392096	0.316784	0.344456	0.35326	0.364213	0.320408	0.36774	0.386049	0.299447	0.247516	0.261094	0.24697	0.172682	0.17399	0.240874	0.254396	0.271225	0.199867	0.339729	0.207521	0.279479	0.211884	0.188597	0.310394	0.278192	0.210641	0.269062	0.260261	0.31916	0.30139	0.323677	0.300591	0.326856	0.275714	0.271479	0.321151	0.233401	0.223317	0.193478	0.498872	0.498908	0.293517
ATGTAGAA	0.210151	-0.0744472	0.187076	0.249159	0.223268	0.169038	0.274969	0.343049	0.171769	0.155315	0.287943	0.106479	0.285665	0.241741	0.283297	0.205687	0.120949	0.308372	0.227637	0.324763	0.150902	0.214816	0.145523	0.198865	0.16522	0.235727	0.0983213	0.160024	0.0911738	0.204719	0.164114	0.284054	0.0936491	0.299746	0.201901	0.257001	0.179192	0.293526	0.186192	0.259305	0.138749	0.302921	0.265909	0.189867	0.0811928	0.184769	0.453576	0.455636	0.196958
TGTAGAAA	0.262272	0.125222	0.19753	0.280694	0.255155	0.25691	0.288068	0.39258	0.308284	0.218109	0.339448	0.278014	0.276574	0.374829	0.260138	0.251197	0.0868149	0.157107	0.171042	0.233194	0.159981	0.269703	0.131428	0.261404	0.191412	0.291524	0.121488	0.28557	0.083886	0.174565	0.100834	0.297926	0.220772	0.262772	0.148713	0.318375	0.250315	0.350581	0.171611	0.311207	0.0319318	0.30218	0.273918	0.220724	0.150616	0.189756	0.48779	0.489262	0.311969
ATTTAACA	0.266354	0.0905481	0.367404	0.381279	0.264633	0.172428	0.239552	0.209002	0.236266	0.29609	0.293326	0.352733	0.249171	0.166836	0.268005	0.175438	0.168656	0.221881	0.254243	0.261296	0.2336	0.261141	0.249975	0.230864	0.308613	0.292986	0.288096	0.342647	0.167029	0.135316	0.315495	0.321099	0.308142	0.290351	0.257042	0.306039	0.284013	0.33612	0.297858	0.335426	0.25564	0.301365	0.360562	0.214663	0.11601	0.0139406	0.474912	0.471507	0.27745
AGTTAAAA	0.0290406	0.287951	0.399723	0.296722	0.313036	0.0201101	0.276421	0.101185	-0.0801258	0.332612	0.219088	0.047336	0.232669	0.126058	0.29023	0.014739	0.13836	0.0712057	0.298774	0.179278	0.270562	0.213491	0.278693	0.0233671	0.341733	0.09528	0.329221	0.225119	0.268665	0.114112	0.316068	0.246548	0.306057	0.178369	0.204785	0.207819	0.282012	0.210617	0.277676	0.154391	0.176664	0.107336	0.245468	-0.00732219	0.197352	-0.123433	0.482279	0.473835	0.284308
GGTTAAAA	0.186563	0.166141	0.373352	0.0783596	0.226446	-0.067062	0.157973	-0.0485491	-0.0732591	0.210346	0.136703	0.0108662	0.179458	0.041394	0.182758	0.010983	0.066879	0.030292	0.256103	0.0895564	0.137171	-0.0342066	0.146662	0.015069	0.264475	0.0300147	0.204028	0.00608817	0.173158	-0.00478602	0.252476	0.0874922	0.121976	-0.00864436	0.0478397	0.0245535	0.217528	0.0226061	0.173009	0.07057	0.117211	0.17743	0.172377	-0.0577541	0.0845815	-0.0483967	0.468929	0.464661	0.0145479
GTTAAAAA	0.144504	0.267133	0.397292	0.314114	0.201484	0.0185466	0.218265	0.153929	0.0709153	0.307787	0.13003	0.0921652	0.214376	0.227067	0.20632	-0.0547517	0.117367	0.139027	0.274043	0.199126	0.247171	0.197429	0.248664	-0.0107104	0.324166	0.0978803	0.209961	0.115727	0.175896	-0.00772948	0.280003	0.2346	0.246763	0.113612	0.0884967	0.16039	0.280725	0.194742	0.247626	0.209241	0.21686	0.0732509	0.20391	-0.0313206	-0.00330688	-0.0933085	0.494311	0.493343	0.27106
ATTTTTAA	0.146837	0.0508233	0.375739	0.425752	0.0985188	0.0102154	0.208506	0.266182	0.290882	0.232102	0.255596	0.35451	0.234094	0.232984	0.150868	0.0631858	0.0431663	0.232603	0.36323	0.343346	0.232802	0.348747	0.287001	0.0812314	0.300446	0.298046	0.207519	0.389402	0.190528	0.0612141	0.318305	0.365215	0.270797	0.304896	0.270684	0.314211	0.317879	0.373361	0.323393	0.360442	0.262741	0.268243	0.237864	-0.0351715	-0.0523494	-0.00951222	0.457917	0.458407	0.434378
TTAAAAAA	0.219321	0.188092	0.385065	0.423856	0.219908	-0.00389844	0.263833	0.191886	0.0527952	0.286259	0.213702	0.289336	0.193186	0.1688	0.268947	0.0414757	0.123602	0.106876	0.383591	0.221313	0.274175	0.34016	0.333507	0.107159	0.367203	0.276472	0.17057	0.322223	0.268229	0.313245	0.327335	0.34257	0.310268	0.323459	0.101082	0.316287	0.333642	0.358923	0.33845	0.319712	0.170111	0.282206	0.192806	0.0152281	-0.143771	-0.0538886	0.443637	0.462488	0.362146
TTGAAAAA	0.267802	0.283906	0.376257	0.352588	0.241752	0.189393	0.135242	0.22174	0.161058	0.239776	0.199441	0.332667	0.137433	0.260361	0.221915	0.173221	0.145135	0.206379	0.317006	0.267511	0.132221	0.303535	0.199505	0.245867	0.283543	0.310532	0.208184	0.322175	0.249774	0.155259	0.282366	0.391566	0.295685	0.354627	0.130634	0.34214	0.252543	0.378788	0.211255	0.337168	0.186415	0.310656	0.168153	0.094829	0.190788	0.0693379	0.441598	0.453852	0.331123
ATTTTCAA	0.248232	0.023881	0.21482	0.39576	0.110268	0.152679	0.0082533	0.178182	0.196439	0.140989	0.157228	0.256502	0.0559034	0.188284	0.149716	0.203014	0.0425938	0.178776	0.264026	0.269471	0.066641	0.307753	0.235496	0.221288	0.230144	0.2846	0.126708	0.310871	0.0988392	0.244159	0.175141	0.356622	0.0717098	0.299793	0.0294176	0.334643	0.0890634	0.377708	0.143572	0.331864	0.0357605	0.315516	0.121484	0.180133	-0.0400229	0.109407	0.447906	0.464576	0.410376
ACTTTTAA	0.410645	0.211386	0.408125	0.432293	0.159604	0.0588629	0.272259	0.363172	0.137414	0.169927	0.257125	0.259985	0.152161	0.346983	0.300046	0.0924991	-0.00946257	0.28863	0.201062	0.349471	0.149379	0.361023	0.327391	0.15181	0.266067	0.349095	0.226773	0.376377	0.279811	-0.0700207	0.312049	0.384275	0.29425	0.338955	0.163182	0.382882	0.361717	0.409305	0.26941	0.440591	0.155068	0.346437	0.297179	0.105644	-0.047563	0.0473484	0.388521	0.458359	0.391236
AAAAACTT	0.273967	0.162746	0.361073	0.448641	0.138008	0.169273	0.211093	0.313825	0.297993	0.1831	0.197631	0.404665	0.146751	0.379135	0.242302	0.191195	0.221243	0.289882	0.228427	0.367831	0.151091	0.353013	0.196184	0.23859	0.286292	0.357148	0.169126	0.382273	0.133343	0.156299	0.261663	0.387967	0.227062	0.35339	0.149476	0.320541	0.200877	0.38513	0.219253	0.38487	0.191818	0.356978	0.212469	0.0575192	0.00749743	0.122543	0.256238	0.468553	0.455867
AAAACTTT	0.214125	0.13749	0.418527	0.452655	0.220194	0.0728704	0.311319	0.38829	0.293783	0.274885	0.292383	0.329948	0.372274	0.38598	0.282321	0.172185	0.048352	0.311045	0.234474	0.293005	0.103183	0.305165	0.282254	0.110988	0.313966	0.306242	0.24369	0.351041	0.15138	0.0485003	0.337137	0.373598	0.207947	0.360267	0.18752	0.360056	0.293777	0.401017	0.282147	0.376896	0.170488	0.339854	0.248633	0.021516	0.000995798	0.0753467	0.262335	0.450609	0.456808
AAAGTTAC	-0.0938608	0.137485	0.474662	0.462953	0.0542383	-0.104335	0.12851	-0.084139	0.0799566	0.184162	0.070276	-0.0224061	0.0874018	-0.0709611	0.154091	-0.158503	0.150206	-0.208831	0.162789	-0.0402791	0.364157	0.325849	0.319884	-0.00794801	0.393395	-0.000843061	0.386914	0.370817	0.460954	0.181427	0.429131	0.39484	0.35041	0.311249	0.255211	0.252835	0.305528	0.181229	0.213281	0.0520653	0.109991	-0.127572	0.260884	-0.217718	0.10728	-0.283268	0.371737	0.242458	0.0111509
AAATAAGT	0.130482	0.236207	0.457831	0.408572	0.168545	0.179001	0.280945	0.199097	0.131709	0.260102	0.233693	0.247311	0.266556	0.143161	0.227438	0.114132	0.134007	0.121518	0.360675	0.253914	0.316964	0.26402	0.342565	0.248603	0.403135	0.248364	0.332757	0.314641	0.308239	0.223393	0.393744	0.3035	0.325984	0.231537	0.265721	0.32849	0.374544	0.331508	0.353594	0.268468	0.193061	0.260206	0.28991	0.203886	0.120173	0.20931	0.210907	0.259305	0.338527
AATATTTC	0.235406	0.0455245	0.486873	0.431747	0.147716	0.214485	0.124196	0.266249	0.335498	0.233242	0.317062	0.275947	0.190613	0.205933	0.13826	0.24027	0.189521	0.178419	0.264321	0.297374	0.143276	0.227226	0.353316	0.273319	0.38946	0.313318	0.357322	0.314797	0.272597	0.233663	0.369369	0.350722	0.356793	0.28833	0.260281	0.284101	0.369741	0.356716	0.341107	0.31921	0.170337	0.35092	0.288376	0.21619	0.164188	0.147576	0.311957	0.253451	0.408568
AAATTTAC	-0.250585	0.0385747	0.453897	0.337869	0.221229	-0.161083	0.0994847	-0.083907	-0.074259	0.201654	0.290683	0.0412772	0.247571	-0.173755	0.142056	-0.173518	0.00820346	-0.137779	0.262292	-0.115614	0.203522	-0.0659189	0.178409	-0.14168	0.307546	-0.0500566	0.292024	-0.00110582	0.135861	-0.181531	0.243937	0.043972	0.265259	-0.114569	0.284479	0.1514	0.27456	0.0977927	0.3033	-0.00370282	0.251826	-0.164016	0.281962	-0.0293257	0.150574	-0.120761	0.301493	-0.0517266	0.207116
AAAATGTG	0.0150109	0.302824	0.470537	0.259903	0.146954	0.0253022	0.256274	0.183167	-0.0593567	0.214689	0.152495	-0.132698	0.0999724	0.118092	0.292884	-0.0481845	0.160695	0.143753	0.314415	0.0843833	0.344747	0.104788	0.33993	-0.0676144	0.323829	-0.0129399	0.338801	0.0995127	0.252343	-0.096689	0.377803	0.152556	0.291831	0.111843	0.319069	0.0732675	0.388019	0.156979	0.374894	0.154423	0.281736	0.0104278	0.324622	-0.109963	0.179915	-0.21831	0.377428	-0.0857952	0.18271
AAATGTGA	0.0559201	0.267612	0.457233	0.380888	0.23079	-0.0269938	0.216264	-0.100966	-0.0991213	0.212925	0.16336	-0.110568	0.0856509	-0.0224518	0.250667	-0.0195126	0.18391	0.0131733	0.249723	0.072412	0.269589	0.0179007	0.341904	-0.0590121	0.315421	-0.0149223	0.294836	0.0208895	0.258041	-0.167778	0.331357	-0.0282935	0.327732	0.0639238	0.225488	-0.104335	0.342154	0.0620493	0.254794	0.121966	0.210586	-0.0213466	0.262434	-0.0374923	0.206906	-0.118376	0.373622	-0.0340069	0.17353
AAAAATGT	0.187394	0.212088	0.453778	0.417532	0.198033	0.0936906	0.344241	0.386005	0.196775	0.273992	0.213619	0.197662	0.307755	0.365688	0.299905	0.0816208	0.221832	0.336463	0.310342	0.257188	0.32437	0.264823	0.323958	0.0816442	0.381003	0.246321	0.303566	0.245057	0.292524	-0.00209964	0.368767	0.28267	0.305134	0.300474	0.331998	0.305353	0.431326	0.341279	0.409343	0.333656	0.305835	0.258008	0.35687	-0.0806675	0.148937	-0.188273	0.341324	0.277646	0.393699
AATGTTAA	0.289686	0.300046	0.450306	0.434535	0.303202	0.278724	0.380028	0.308188	0.347037	0.374052	0.317233	0.331247	0.338229	0.311659	0.30994	0.280342	0.312079	0.260587	0.41733	0.304697	0.339419	0.293377	0.411621	0.348308	0.364417	0.367362	0.392836	0.371376	0.26262	0.26704	0.393168	0.347481	0.375218	0.290533	0.373953	0.361605	0.439535	0.40303	0.419265	0.391387	0.348703	0.352905	0.413701	0.268937	0.270857	0.114846	0.408416	0.377825	0.381956
ACATTTTA	0.238892	0.304164	0.461679	0.410076	0.29558	0.217011	0.400634	0.388984	0.304554	0.398145	0.269386	0.297826	0.329807	0.386679	0.377625	0.194949	0.305486	0.301583	0.41027	0.363712	0.370885	0.377336	0.402605	0.221753	0.412119	0.285849	0.393905	0.339399	0.343089	0.137439	0.411963	0.403194	0.392251	0.319058	0.365302	0.373303	0.44602	0.400898	0.434727	0.382857	0.342339	0.299694	0.399904	0.16513	0.208115	0.0741991	0.445948	0.326184	0.366895
ATTTAAAT	0.274793	0.104967	0.47122	0.364039	0.269834	0.240586	0.305523	0.200407	0.34425	0.335561	0.403879	0.397384	0.256165	0.259836	0.364474	0.213157	0.240275	0.197985	0.371068	0.399226	0.295756	0.279231	0.405437	0.319481	0.409477	0.353682	0.432977	0.270576	0.293159	0.172984	0.422913	0.328511	0.435617	0.299066	0.349592	0.322774	0.43528	0.393074	0.393366	0.392808	0.420906	0.323084	0.417894	0.279383	0.216903	0.251464	0.303839	0.195781	0.380578
TAAATTTA	-0.0256945	0.099719	0.482986	0.441911	0.378296	0.047001	0.363859	0.153139	0.101996	0.341631	0.412929	0.0926686	0.386138	0.189908	0.280954	0.115564	0.0972163	0.120321	0.452218	0.162007	0.405289	0.298443	0.358	0.117716	0.373277	0.300868	0.458323	0.182454	0.402469	-0.13851	0.444066	0.284635	0.450588	0.252822	0.432533	0.244599	0.468576	0.309212	0.435743	0.291866	0.428686	0.147335	0.442019	0.0741758	0.327142	0.213616	0.411605	0.00790958	0.310706
AATGTTAT	0.151904	0.270359	0.469895	0.431745	0.396175	0.139576	0.422206	0.273985	0.229158	0.387211	0.338342	0.323254	0.277005	0.124321	0.384419	0.0992934	0.293465	0.22281	0.381531	0.18234	0.388028	0.345106	0.368089	0.207189	0.399429	0.235769	0.438176	0.376303	0.387949	0.130477	0.438715	0.373912	0.378692	0.286476	0.354703	0.388566	0.435859	0.393129	0.409302	0.333861	0.373267	0.281447	0.440918	0.18655	0.276195	-0.0465837	0.377039	0.167736	0.249173
AAAATGTT	0.279311	0.251736	0.472274	0.476969	0.34765	0.32224	0.461528	0.459444	0.416216	0.429054	0.30535	0.383324	0.439269	0.450146	0.411933	0.321419	0.33975	0.408865	0.374866	0.363834	0.371707	0.403951	0.408273	0.242348	0.42976	0.359841	0.361424	0.410638	0.368529	0.113066	0.412029	0.420436	0.385769	0.391993	0.375724	0.438616	0.447159	0.44781	0.450767	0.43678	0.363965	0.358542	0.356062	0.159737	0.332052	0.0973991	0.418228	0.356457	0.444584
AACATATT	0.217773	0.0965801	0.445021	0.467703	0.349967	0.39529	0.441888	0.456007	0.342885	0.389201	0.379625	0.327767	0.431797	0.41538	0.399563	0.389506	0.181619	0.329615	0.363827	0.372517	0.235248	0.383337	0.35776	0.394294	0.394914	0.380595	0.409982	0.418081	0.320043	0.318217	0.428255	0.44283	0.307444	0.383476	0.41935	0.43147	0.441351	0.439905	0.404197	0.4119	0.30611	0.330602	0.394484	0.322813	0.30944	0.305806	0.314031	0.319134	0.38421
AAAAGTTT	0.241777	0.216784	0.447659	0.477259	0.319775	-0.0683315	0.446441	0.441807	0.269121	0.368865	0.319598	0.387699	0.443393	0.404981	0.381618	0.134318	0.263208	0.341669	0.246421	0.255356	0.201085	0.370321	0.250527	-0.0363334	0.319892	0.1825	0.242718	0.364891	0.110265	-0.0162954	0.349421	0.395299	0.208641	0.359138	0.192588	0.347833	0.275581	0.401888	0.302766	0.352064	0.148128	0.30394	0.210162	-0.191009	0.0728822	0.0018767	0.297417	0.341769	0.452071
AACTTTTG	0.275187	0.275042	0.453691	0.432682	0.264583	-0.0570319	0.399993	0.299088	0.166395	0.296423	0.162174	0.12903	0.406077	0.231919	0.318794	-0.0436259	0.18316	0.207954	0.113893	0.135504	0.286851	0.221303	0.235696	-0.0242309	0.363714	0.124345	0.302998	0.245577	0.242878	0.061528	0.343543	0.287567	0.267082	0.260461	0.154314	0.188432	0.32345	0.253467	0.221294	0.140136	0.224464	0.178209	0.215573	-0.190658	0.162183	0.0173063	0.347701	0.263507	0.429108
AACATTTA	0.28974	0.206678	0.468085	0.453278	0.310896	0.272613	0.461975	0.428485	0.41363	0.412827	0.424652	0.457117	0.426651	0.390441	0.382745	0.305122	0.251375	0.279108	0.3475	0.386415	0.282497	0.377608	0.338531	0.332629	0.371986	0.371395	0.364359	0.404422	0.311416	0.305756	0.414224	0.432996	0.335221	0.328448	0.361877	0.423979	0.437283	0.454403	0.395126	0.428896	0.312575	0.383782	0.391404	0.263833	0.233965	0.216968	0.245791	0.412712	0.426169
AACATTTC	0.252764	0.29856	0.462007	0.450584	0.373147	0.276473	0.439401	0.43081	0.433112	0.400562	0.331729	0.425551	0.434659	0.395758	0.371907	0.266798	0.3527	0.296983	0.308914	0.26156	0.201694	0.334825	0.314964	0.257612	0.340183	0.318953	0.326014	0.337722	0.282998	0.293816	0.36107	0.403879	0.294322	0.283031	0.346826	0.376108	0.393362	0.402387	0.381891	0.370887	0.339161	0.276749	0.391107	0.249717	0.288799	0.244822	0.330288	0.319687	0.390483
AAAGTTTA	0.0917827	0.106952	0.452126	0.413596	0.282023	0.116648	0.434793	0.418279	0.170244	0.394402	0.333042	0.25818	0.40825	0.330713	0.346872	0.122227	0.103814	0.234537	0.335606	0.202155	0.0967584	0.220246	0.240381	0.0884937	0.317661	0.151705	0.27359	0.32256	0.187592	0.190424	0.34694	0.353752	0.233728	0.229435	0.260052	0.321493	0.314974	0.342275	0.333605	0.299187	0.238608	0.255626	0.300114	0.0660212	0.12449	-0.00148975	0.254676	0.245734	0.373004
AAATTTTC	0.116318	0.123945	0.43881	0.468588	0.174316	0.0881638	0.225724	0.108642	0.212125	0.25927	0.29775	0.325808	0.0734562	0.161533	0.279249	0.0847011	0.175188	0.164063	0.337677	0.202783	0.182239	0.306466	0.34069	0.168667	0.31923	0.243241	0.274706	0.364791	0.16445	0.203913	0.30162	0.322851	0.337322	0.27726	0.164329	0.32114	0.299101	0.349799	0.200257	0.295126	0.245845	0.246771	0.219529	0.018031	0.157912	-0.0171128	0.32172	0.401183	0.431307
AAAATTTG	-0.25391	0.129846	0.443355	0.413748	0.19021	-0.262525	0.259078	-0.173049	0.0498726	0.3142	0.242802	0.185426	0.25974	-0.1383	0.252394	-0.159517	0.218372	-0.0931603	0.249896	0.00818886	0.18369	0.150884	0.33849	-0.107624	0.368598	0.0568389	0.24716	0.274525	0.138628	-0.00154232	0.302531	0.274151	0.329753	0.201534	0.200707	0.176822	0.324875	0.258169	0.288091	0.194232	0.204217	0.134624	0.211212	-0.200218	0.184329	-0.230452	0.368348	0.269304	0.416291
AAATTTGT	-0.184771	0.188478	0.466286	0.423898	0.270559	0.0779917	0.303264	0.163432	0.203498	0.363334	0.298259	0.215206	0.233652	0.168109	0.235688	0.116268	0.228253	0.089701	0.339508	0.125313	0.337659	0.245972	0.35992	0.130268	0.396312	0.172877	0.383076	0.323708	0.244049	-0.0551008	0.375601	0.327992	0.436073	0.232704	0.353704	0.257617	0.406533	0.332535	0.346471	0.241077	0.336406	0.218755	0.348683	0.036489	0.270236	-0.0455163	0.399825	0.304956	0.411176
AAAATATT	0.152092	0.203138	0.485656	0.484943	0.320258	0.263272	0.292092	0.326446	0.264053	0.35693	0.210915	0.329919	0.277616	0.216132	0.307273	0.196488	0.208359	0.195588	0.376222	0.374359	0.384498	0.411361	0.397605	0.326716	0.448338	0.421774	0.398221	0.452959	0.345644	0.212031	0.405394	0.447905	0.39743	0.420069	0.348293	0.403205	0.411866	0.446284	0.42083	0.422918	0.344554	0.375982	0.379816	0.169543	0.209586	0.188903	0.367754	0.440104	0.469796
AAATATTT	0.193331	0.0531668	0.492593	0.471337	0.164971	0.299537	0.134467	0.38242	0.301838	0.24531	0.215915	0.34887	0.261457	0.318216	0.157431	0.214757	0.0596469	0.281128	0.388396	0.375865	0.235789	0.407114	0.399911	0.30283	0.454909	0.331928	0.395633	0.431753	0.297415	0.24027	0.38713	0.41744	0.382291	0.357385	0.284958	0.418364	0.401729	0.44477	0.408462	0.428038	0.339635	0.350718	0.347173	0.264797	0.152035	0.130392	0.321273	0.383034	0.417626
AAAATTGT	0.119763	0.147577	0.455754	0.450797	0.264557	0.0877972	0.321097	0.137988	0.379896	0.297764	0.258441	0.40327	0.308757	0.217839	0.337302	0.227229	0.194487	0.0804372	0.400226	0.227196	0.293925	0.323209	0.416014	0.196118	0.380231	0.332996	0.412589	0.380561	0.357091	0.153632	0.36318	0.394252	0.379341	0.336984	0.305698	0.324086	0.408694	0.392978	0.379619	0.329976	0.31423	0.313874	0.357179	0.00605977	0.162893	-0.0440364	0.317836	0.277596	0.395568
ATATTTTA	0.13666	0.26579	0.469721	0.454206	0.351876	0.205834	0.296399	0.249178	-0.0074106	0.305235	0.347755	0.0751576	0.341689	0.253015	0.298607	0.125751	0.215462	0.285314	0.408421	0.303686	0.375385	0.364636	0.391469	0.246588	0.43057	0.232685	0.410636	0.329696	0.358216	0.169544	0.414811	0.361727	0.388772	0.349327	0.366839	0.305597	0.433456	0.375363	0.436092	0.377534	0.378131	0.301583	0.39196	0.128083	0.280839	-0.00424348	0.374593	0.315551	0.384976
AAATATTA	0.280091	0.229089	0.48786	0.475116	0.32107	0.162817	0.308836	0.186803	0.268379	0.321677	0.291728	0.288816	0.268842	0.157241	0.287962	0.13438	0.248542	0.254167	0.410639	0.332361	0.342131	0.373204	0.415692	0.307306	0.443774	0.354312	0.424254	0.397829	0.365631	0.179851	0.410162	0.398805	0.442321	0.387691	0.330756	0.340835	0.41043	0.419101	0.417127	0.375217	0.322937	0.316825	0.33557	0.177887	0.276099	0.0428252	0.383567	0.334016	0.460611
AATATTTA	0.0601235	0.124528	0.476723	0.453481	0.19793	0.114943	0.188945	0.127148	0.200645	0.221437	0.149935	0.362537	0.238861	0.0738882	0.237708	0.0970307	0.13448	0.280554	0.42305	0.27609	0.308008	0.313227	0.360916	0.186962	0.43485	0.236888	0.378109	0.352425	0.252687	0.0801231	0.392915	0.34971	0.408582	0.328807	0.314072	0.342342	0.393713	0.379147	0.418593	0.321154	0.409243	0.201244	0.373825	0.0993956	0.233828	-0.166756	0.356863	0.218427	0.429604
AAAATTAT	0.00339181	0.126314	0.459534	0.446065	0.253747	0.0180525	0.180641	0.174305	0.304568	0.25424	0.323916	0.236384	0.218387	0.200171	0.175043	0.0960175	0.0890938	0.14468	0.411941	0.340877	0.347074	0.303096	0.386299	0.141192	0.426012	0.297983	0.373927	0.366707	0.334724	0.154255	0.392566	0.357971	0.385331	0.348755	0.344866	0.307882	0.400062	0.353595	0.384511	0.320578	0.245578	0.251214	0.372346	0.0561429	0.13407	0.007593	0.399538	0.271264	0.461419
AAATAATT	0.253613	0.214928	0.464876	0.463997	0.260708	0.0954384	0.272473	0.211344	0.236785	0.288623	0.272856	0.296971	0.208413	0.254755	0.295992	0.0520286	0.181854	0.132744	0.424277	0.324894	0.382485	0.389519	0.418088	0.306531	0.410783	0.364476	0.41561	0.386043	0.37383	0.10346	0.416431	0.382312	0.399356	0.357345	0.321628	0.387411	0.429875	0.421461	0.378477	0.410161	0.368938	0.30845	0.372676	0.120488	0.18954	0.0996713	0.328624	0.355674	0.464496
AAATTATT	0.123382	0.207313	0.455197	0.460288	0.279995	0.160062	0.198669	0.201931	0.26921	0.305734	0.338884	0.225637	0.270944	0.224659	0.219982	0.189497	0.0696628	0.173927	0.419359	0.327409	0.324436	0.374427	0.420165	0.283036	0.415095	0.381267	0.381971	0.407111	0.343972	0.220773	0.379493	0.394396	0.342911	0.371931	0.29368	0.388161	0.404053	0.414352	0.370476	0.39848	0.296689	0.328787	0.321279	0.208141	0.179055	0.171903	0.34627	0.289911	0.467758
AATTTTTA	0.119574	0.0889404	0.459679	0.44421	-0.00180311	0.0680005	0.236663	0.260555	0.26054	0.219511	0.210957	0.399886	0.146278	0.287069	0.217401	0.164447	0.124962	0.2861	0.304281	0.346697	0.27188	0.303396	0.327569	0.223269	0.448837	0.329551	0.321248	0.35368	0.259748	0.0201573	0.377837	0.366511	0.404237	0.347218	0.207636	0.315424	0.328401	0.395353	0.361038	0.388974	0.200003	0.32223	0.247858	0.0281645	-0.0641741	0.0210389	0.394856	0.424999	0.464325
AATATTTG	0.110067	0.151579	0.464235	0.417458	0.0743584	0.167393	0.171511	0.135278	0.175973	0.196103	0.0881929	0.0908555	0.00749447	0.0823489	0.159258	0.147969	0.0824366	0.128675	0.243776	0.251555	0.251405	0.282441	0.346642	0.231699	0.425517	0.247949	0.330399	0.237173	0.264876	0.081607	0.353454	0.33139	0.355204	0.228823	0.211934	0.300757	0.308038	0.338439	0.271362	0.295229	0.232443	0.173381	0.253461	0.231172	0.0727698	0.0602178	0.24562	0.345106	0.434842
AAAATTTC	0.167788	0.140475	0.456931	0.468792	0.0706824	0.0524147	-0.0104848	0.189943	0.272322	0.0701815	-0.0257086	0.280301	-0.167366	0.177862	0.163176	0.0604337	0.193028	0.11977	0.185139	0.243904	0.1831	0.241441	0.261234	0.181569	0.342433	0.283596	0.223965	0.255972	0.186575	0.139234	0.234961	0.287562	0.331008	0.257223	-0.0676775	0.300597	0.211124	0.34557	0.119764	0.319955	0.115914	0.206401	0.0332035	0.0958851	0.0897927	0.134748	0.281529	0.472063	0.483394
AAATTTTG	-0.0978687	0.0720236	0.463355	0.414784	0.198974	-0.0926652	0.14105	0.182445	0.238318	0.161424	0.298852	0.160793	0.151103	0.0863769	0.17179	-0.0949701	0.136587	0.0390082	0.191125	0.0868032	0.184072	0.156943	0.263756	0.0339226	0.335747	0.179887	0.320217	0.222505	0.233851	-0.0654082	0.31574	0.269666	0.334088	0.216815	0.266153	0.210444	0.325066	0.273222	0.294	0.243451	0.332795	0.0994482	0.23943	-0.134486	0.255283	-0.130277	0.370954	0.432267	0.453029
AAATTTTA	0.0638641	0.180038	0.480592	0.47358	0.156636	0.105178	0.239736	0.22648	0.246885	0.286378	0.159831	0.391784	0.113776	0.264768	0.303766	0.0462763	0.17537	0.172306	0.259858	0.329648	0.237516	0.269076	0.352851	0.139361	0.400593	0.304896	0.298006	0.325625	0.216064	0.108052	0.349928	0.3404	0.347796	0.299615	0.138112	0.318482	0.365055	0.381683	0.325976	0.378567	0.187971	0.322307	0.221286	0.082646	0.0956223	-0.0647659	0.40075	0.407777	0.462731
AATTTTAC	-0.0196441	0.17075	0.454656	0.444185	0.176184	0.115789	0.171508	0.126688	0.247354	0.236465	0.245694	0.229209	0.0718622	0.0842368	0.267588	0.074459	0.176877	0.140418	0.333045	0.152427	0.277852	0.166184	0.263491	0.175324	0.295192	0.211125	0.314151	0.211465	0.157228	0.0246907	0.276315	0.245579	0.319304	0.258221	0.177622	0.267255	0.30232	0.301482	0.265365	0.250207	0.26654	0.230269	0.296938	0.110645	0.133269	-0.00389806	0.310751	0.366479	0.438396
AAAAATTT	0.166019	0.0477192	0.479275	0.481821	0.0584714	-0.0574477	0.212738	0.216955	0.21323	0.251062	0.253395	0.340462	0.153814	0.247006	0.157416	-0.0338832	0.178657	0.210478	0.325452	0.297917	0.160928	0.359334	0.314417	0.109813	0.413697	0.305931	0.304408	0.359431	0.203575	0.15067	0.307559	0.398487	0.37844	0.35514	0.261208	0.382803	0.307224	0.427771	0.312976	0.41947	0.261592	0.331887	0.217908	-0.115677	0.00316145	-0.0160193	0.384402	0.45457	0.484622
AAAATTTT	0.0184331	0.0283039	0.486236	0.475364	0.12036	-0.00971473	0.301491	0.319068	0.273682	0.311906	0.342006	0.388021	0.167576	0.329222	0.24654	-0.0715892	0.137125	0.257003	0.31776	0.340077	0.168578	0.347086	0.348537	0.0626283	0.364734	0.304332	0.362184	0.348478	0.18428	0.071807	0.341979	0.378467	0.388048	0.340567	0.320476	0.379531	0.38744	0.391598	0.369331	0.38812	0.385779	0.332155	0.306182	-0.277469	0.16768	-0.200349	0.418132	0.447806	0.486053
GTAACTTA	0.17282	-0.0301461	0.410742	0.459811	0.155659	0.349425	0.148553	0.215197	0.212669	0.124322	0.0420975	0.169857	0.13236	0.186849	0.137488	0.324031	0.133127	0.144355	0.204837	0.346615	0.319052	0.402487	0.270892	0.344866	0.317935	0.33774	0.327172	0.439184	0.412081	0.32576	0.371449	0.441288	0.314856	0.366124	0.219058	0.334766	0.23599	0.337518	0.137876	0.274127	0.0787119	0.264621	0.15103	0.304215	0.0793129	0.2486	0.209272	0.316962	0.22952
AATATTAT	0.128537	0.126359	0.425035	0.452781	0.159201	0.106788	0.161583	0.19027	0.310947	0.184277	0.144269	0.25884	0.106137	0.184579	0.186343	0.0639555	-0.0538561	0.0771771	0.313539	0.25002	0.281874	0.31588	0.383385	0.213437	0.400319	0.316004	0.372424	0.392686	0.238256	0.0232046	0.375375	0.343522	0.390486	0.309216	0.255004	0.326929	0.394576	0.389712	0.347336	0.325172	0.23158	0.106882	0.245906	0.0667307	0.0542553	0.072167	0.214793	0.144533	0.369404
TAATATAA	0.265463	0.109347	0.373351	0.451259	0.268019	0.234794	0.193745	0.190343	0.324947	0.224681	0.340787	0.290124	0.220823	0.251566	0.204574	0.242943	0.0444549	0.221975	0.385546	0.337609	0.261603	0.349389	0.371199	0.350631	0.408983	0.399676	0.347653	0.411132	0.307013	0.314178	0.378716	0.368359	0.384641	0.336616	0.314529	0.302578	0.38767	0.389675	0.352771	0.368508	0.312543	0.320709	0.367365	0.224691	0.203855	0.223742	0.294268	0.334243	0.372342
TAAATTAA	0.324268	0.1736	0.387791	0.475289	0.15808	0.232159	0.0908362	0.371955	0.248374	0.129075	0.148955	0.298187	0.0795654	0.356698	0.128329	0.251749	0.112533	0.302713	0.367286	0.411399	0.222565	0.403926	0.242599	0.332902	0.305776	0.406297	0.306461	0.417471	0.213904	0.189298	0.32664	0.388996	0.305008	0.379218	0.22627	0.383305	0.341374	0.421147	0.336753	0.431127	0.34119	0.388335	0.26882	0.212613	0.14839	0.184867	0.264587	0.377732	0.429301
AAAGTTAA	0.285981	0.277171	0.391834	0.461033	0.107902	0.17295	0.182475	0.233715	0.221478	0.163879	0.207216	0.279295	0.22607	0.1834	0.0971598	0.151608	0.0321474	0.164743	0.33152	0.237285	0.282261	0.34079	0.27555	0.269576	0.337187	0.329554	0.213059	0.325653	0.243447	0.0678547	0.29214	0.34323	0.268185	0.308982	0.19847	0.274793	0.266426	0.323242	0.265092	0.312366	0.234976	0.248208	0.271055	0.0351985	0.107046	0.121637	0.356912	0.200592	0.324442
ATAAGTTA	0.167461	0.0449595	0.425173	0.464436	0.168685	0.338864	0.0968445	0.245718	0.139182	0.116974	0.261315	0.135445	0.0935409	0.20265	0.18387	0.315066	-0.0541113	0.279762	0.238053	0.3464	0.261405	0.366124	0.255141	0.359454	0.289891	0.361976	0.29631	0.383931	0.331436	0.368819	0.339728	0.390527	0.267026	0.399734	0.131136	0.310356	0.26556	0.356545	0.192031	0.321314	0.0689829	0.359973	0.190088	0.304027	0.0697122	0.272574	0.181647	0.2467	0.268653
AACTTATT	0.256207	0.0228929	0.398049	0.465344	0.109415	0.301286	0.257274	0.349259	0.304962	0.20929	0.320689	0.401424	0.306418	0.316699	0.189556	0.316203	-0.0519687	0.215225	0.228587	0.345203	0.211513	0.32469	0.260291	0.347151	0.308711	0.363574	0.281026	0.399191	0.233933	0.184407	0.290482	0.397126	0.229696	0.354002	0.21019	0.373763	0.281596	0.382411	0.221709	0.400849	0.114427	0.38943	0.195078	0.221264	0.068264	0.180775	0.102163	0.343417	0.342739
AAGTTATA	0.156853	0.128035	0.389788	0.452708	0.183605	0.30248	0.170568	0.248982	0.234853	0.212708	0.323143	0.342643	0.0808261	0.189532	0.195316	0.223445	0.0312074	0.0771596	0.329663	0.334258	0.259636	0.376327	0.311234	0.350613	0.334225	0.391535	0.321437	0.411071	0.298084	0.215668	0.368046	0.401538	0.23729	0.323023	0.22363	0.382951	0.327379	0.397345	0.289306	0.356721	0.210104	0.352368	0.333269	0.260548	0.18525	0.11313	0.167903	0.310165	0.255007
TTTTAAAA	0.336201	0.287319	0.421939	0.472426	0.265646	-0.0701394	0.392189	0.345711	0.387337	0.361416	0.383332	0.42108	0.390156	0.343539	0.309895	0.161479	0.0764496	0.266176	0.318402	0.325272	0.1972	0.293483	0.327771	0.00375827	0.361955	0.298103	0.334239	0.367728	0.241804	0.150699	0.383709	0.351957	0.400292	0.312538	0.270615	0.377161	0.398214	0.384448	0.390901	0.370275	0.309693	0.289046	0.34821	-0.149757	0.123475	0.11221	0.395246	0.381185	0.442718
ATATTTTG	0.159082	0.184929	0.409907	0.458448	0.0844914	0.280218	0.172605	0.184877	0.117786	0.22442	0.103946	0.298603	0.0636581	0.133037	0.145647	0.249433	0.154279	0.199659	0.324593	0.313481	0.3202	0.345446	0.285476	0.333542	0.365068	0.322973	0.278672	0.372306	0.309598	0.283649	0.342411	0.391553	0.358982	0.387532	0.263661	0.329566	0.318135	0.383422	0.340633	0.372885	0.286395	0.359568	0.259171	0.259842	0.0797575	0.168194	0.247958	0.306933	0.462071
AATTTTTC	0.104715	0.0362762	0.422825	0.456025	-0.00058404	-0.00709527	-0.0808247	0.086224	0.215787	0.0841617	0.0605044	0.266022	-0.0477819	0.209646	-0.0128572	0.0558492	-0.0129713	0.170552	0.279141	0.258635	0.0312292	0.244174	0.187208	0.0855332	0.239477	0.219616	0.179628	0.208973	0.123044	0.110302	0.251018	0.324775	0.234829	0.28136	0.100015	0.242881	0.232617	0.314705	0.183878	0.313648	0.0617771	0.191444	0.0841326	-0.0409004	0.0324539	-0.0137686	0.248772	0.381661	0.443213
TAATTTAA	0.253944	0.0562073	0.45445	0.450632	0.247999	0.256662	0.194096	0.225711	0.100485	0.247669	0.2871	0.198792	0.120263	0.263513	0.109513	0.223489	0.0895698	0.153894	0.368447	0.352111	0.313853	0.348868	0.351061	0.342243	0.370879	0.404288	0.391252	0.357253	0.290566	0.215209	0.398532	0.363997	0.365652	0.277055	0.238411	0.320658	0.379424	0.390902	0.375406	0.408311	0.32445	0.288356	0.318229	0.243439	0.142928	0.157704	0.361515	0.370765	0.405952
AAAATAAT	0.330538	0.299503	0.448843	0.471709	0.345675	0.274218	0.305529	0.286472	0.147059	0.296806	0.197229	0.290393	0.251093	0.309692	0.325497	0.223256	0.334678	0.327507	0.397345	0.385567	0.422349	0.381521	0.406694	0.333519	0.4238	0.394696	0.385767	0.412116	0.348946	0.217703	0.401671	0.398271	0.395766	0.410052	0.343455	0.37482	0.415862	0.431958	0.399474	0.434527	0.387743	0.308004	0.392568	0.283269	0.244876	0.146592	0.37707	0.391754	0.446445
AAATTTAT	0.18789	0.212541	0.471119	0.486044	0.353725	0.254187	0.264638	0.307502	0.298381	0.28829	0.246073	0.290908	0.211301	0.35703	0.170571	0.255625	0.171765	0.24744	0.394077	0.383806	0.355521	0.38127	0.384915	0.336351	0.411192	0.434286	0.384475	0.398293	0.328945	0.193352	0.405592	0.410747	0.415673	0.425606	0.383648	0.394826	0.420146	0.423958	0.412121	0.431467	0.399629	0.37671	0.375489	0.183756	0.221302	0.263656	0.330699	0.360881	0.459813
ATAATTTA	0.221035	0.147643	0.446816	0.468638	0.21336	0.283759	0.175313	0.299905	0.245842	0.242653	0.24884	0.165577	0.0763369	0.315645	0.25346	0.297172	0.058472	0.310491	0.419518	0.350906	0.290929	0.375719	0.319212	0.335593	0.397357	0.411691	0.341811	0.386883	0.295043	0.283574	0.403878	0.378782	0.377861	0.394593	0.221392	0.364708	0.390152	0.40777	0.343008	0.414598	0.262012	0.343204	0.329968	0.296154	0.0288829	0.18394	0.293698	0.285176	0.41813
AAATGTTC	0.107445	0.250551	0.474825	0.462848	0.227743	0.111454	0.281358	0.25589	0.276163	0.268902	0.186738	0.288881	0.315289	0.204325	0.202224	0.121804	0.0806548	0.114225	0.307209	0.0975008	0.157451	-0.00462983	0.282969	0.0656708	0.280136	0.0981358	0.280972	0.18702	0.200813	0.158005	0.317464	0.248595	0.250123	0.142707	0.292592	0.227425	0.34559	0.251194	0.380588	0.206374	0.312216	0.183134	0.276962	0.124872	0.204003	-0.0485549	0.229717	0.174156	0.335928
AATTTAAT	0.111287	0.146659	0.437389	0.455335	0.125656	0.198433	0.173094	0.151859	0.247655	0.159748	0.25699	0.402653	0.16387	0.178514	0.123131	0.163905	-0.0835623	0.25276	0.342988	0.318649	0.22722	0.253969	0.279715	0.253013	0.376726	0.344447	0.346042	0.367797	0.257298	0.0257111	0.405687	0.334161	0.321584	0.30547	0.24523	0.282913	0.382997	0.33579	0.366287	0.367107	0.251754	0.225612	0.29752	0.0243841	0.117132	-0.0576784	0.308695	0.198081	0.413199
AAAAGTTA	0.413511	0.345227	0.478836	0.493318	0.260387	0.207934	0.225992	0.206384	0.2816	0.316681	0.184064	0.222971	0.312259	0.206643	0.218209	0.172364	0.15141	0.299335	0.284586	0.304289	0.36907	0.421059	0.373818	0.297897	0.423441	0.37058	0.388537	0.438906	0.434177	0.270711	0.415622	0.437182	0.409384	0.39824	0.261847	0.346734	0.363609	0.406257	0.317791	0.373173	0.317468	0.312614	0.306006	0.122325	0.196038	0.09583	0.365576	0.385709	0.42859
AACTTTTA	0.342262	0.277627	0.444611	0.481537	0.162206	0.0719905	0.327469	0.384399	0.363681	0.225797	0.135657	0.36128	0.259522	0.32493	0.213268	0.0974452	0.23103	0.2984	0.157138	0.282124	0.192361	0.385671	0.235014	0.183481	0.294372	0.304212	0.219412	0.398528	0.230475	0.124547	0.309071	0.406153	0.298496	0.331428	0.0975361	0.35319	0.276703	0.397849	0.180787	0.379833	0.0672643	0.328846	0.171309	0.0741246	-0.0575988	0.0435547	0.274533	0.383524	0.429641
AAAAAAGT	0.281363	0.284531	0.439082	0.464532	0.25885	0.00578235	0.358271	0.301526	0.0871105	0.333647	0.0546235	0.190721	0.250161	0.277695	0.291376	0.0908512	0.330632	0.311635	0.285452	0.255181	0.315147	0.349104	0.291583	0.0512234	0.362235	0.229446	0.237681	0.343137	0.259232	0.0669195	0.347038	0.393494	0.325017	0.344919	0.225454	0.333089	0.353849	0.398808	0.378247	0.376447	0.242612	0.288585	0.312076	-0.0362599	0.223551	0.0226825	0.384933	0.365163	0.420742
AAAAGTTC	0.387596	0.26067	0.438764	0.451656	0.125383	-0.0661681	0.181782	0.0555671	0.147523	0.0777158	0.068816	0.138138	0.0197095	0.173712	0.177238	-0.216178	0.201589	0.171857	0.128581	0.175578	0.120112	0.105185	0.0730916	0.0437315	0.270315	0.125177	0.0701058	0.22366	-0.06337	0.118793	0.178884	0.198135	0.272801	0.156998	0.0225458	0.157164	0.178588	0.22475	0.0931744	0.216855	0.172641	0.206107	0.0854217	-0.0990056	0.016227	-0.0543496	0.0911985	0.382643	0.380816
AAAATTTA	0.168363	0.0593358	0.467694	0.473316	0.128749	0.200737	0.150961	0.224437	0.257465	0.176137	0.223059	0.350255	0.098335	0.267991	0.198646	0.141542	0.109674	0.231434	0.274577	0.312777	0.158393	0.291238	0.330729	0.252731	0.394652	0.316627	0.259841	0.35975	0.229695	0.158954	0.341665	0.35619	0.346511	0.308228	0.202897	0.317787	0.319351	0.383658	0.264416	0.401433	0.211983	0.32156	0.206415	0.151321	-0.0452947	0.00705665	0.337398	0.398171	0.428386
AAAAAGTT	0.329488	0.330532	0.479556	0.488433	0.320171	0.03205	0.405046	0.334151	0.224785	0.347962	0.30154	0.348038	0.346085	0.296976	0.311381	-0.0329035	0.343841	0.269701	0.357074	0.26748	0.342788	0.371673	0.384163	0.0439627	0.387159	0.29183	0.317741	0.39838	0.331162	0.165271	0.404764	0.41751	0.39487	0.338853	0.23523	0.357549	0.377474	0.410963	0.360029	0.36246	0.356008	0.292658	0.330198	-0.106905	0.306206	0.0151074	0.406687	0.385828	0.422884
AAATTGTT	0.13762	0.133838	0.470796	0.453908	0.338877	0.251941	0.40606	0.383909	0.436851	0.42272	0.362159	0.397462	0.412103	0.333741	0.377884	0.318258	0.230243	0.304539	0.403142	0.256837	0.317236	0.323703	0.388575	0.298594	0.388622	0.310718	0.43219	0.436235	0.391506	0.158191	0.429319	0.410633	0.372907	0.335773	0.345638	0.391483	0.428979	0.417613	0.395886	0.383229	0.327501	0.295677	0.383091	0.163625	0.16942	0.135947	0.344092	0.261433	0.408011
AAATGTTA	0.305842	0.287274	0.476715	0.47259	0.290512	0.174343	0.396451	0.336363	0.32184	0.34481	0.318799	0.417558	0.287628	0.282063	0.329989	0.206222	0.266586	0.203103	0.359129	0.340427	0.400272	0.438577	0.385	0.313537	0.434794	0.381065	0.415041	0.452956	0.426309	0.250613	0.441688	0.460961	0.371474	0.365188	0.36591	0.431388	0.433636	0.458591	0.3968	0.440962	0.358588	0.327618	0.398688	0.161108	0.264581	0.0128194	0.34517	0.408101	0.408463
AAATAGTT	0.253213	0.31334	0.452166	0.462897	0.300448	0.282038	0.386765	0.354505	0.37477	0.363745	0.350433	0.43255	0.343478	0.275872	0.323595	0.27448	0.170384	0.231419	0.308422	0.284556	0.261178	0.356014	0.290026	0.283919	0.30538	0.347644	0.331237	0.427947	0.30026	0.225995	0.36589	0.433846	0.317449	0.362937	0.24444	0.395135	0.390855	0.408421	0.303464	0.38194	0.165588	0.316331	0.282519	0.203651	0.186281	0.113026	0.287557	0.315375	0.371767
AAAAGATA	0.352762	0.265114	0.328262	0.400735	0.146974	0.165555	0.0706711	0.142204	0.191137	0.0501493	0.0583575	0.324599	-0.00856357	0.0958631	0.0445756	0.170753	0.109772	0.167538	0.260362	0.339244	0.329867	0.396515	0.260974	0.278542	0.338049	0.362311	0.358518	0.439317	0.367725	0.232236	0.331226	0.431653	0.395253	0.465381	0.199988	0.340402	0.296818	0.414567	0.24306	0.372757	0.264375	0.380555	0.088048	0.13177	0.102008	0.185159	0.339456	0.322635	0.31969
AACAATAA	0.296394	0.187131	0.382083	0.43954	0.301996	0.358622	0.422993	0.40683	0.422294	0.336055	0.35192	0.431961	0.417406	0.440795	0.356749	0.335271	0.20011	0.360889	0.373503	0.427686	0.390898	0.37409	0.401732	0.405161	0.426416	0.426164	0.434863	0.45203	0.40855	0.317102	0.429708	0.422594	0.369092	0.412617	0.389222	0.433736	0.430722	0.438895	0.385863	0.435099	0.32418	0.377395	0.397169	0.305706	0.24351	0.279012	0.30249	0.359602	0.379027
AAAAATAT	0.193093	0.112729	0.446456	0.469227	0.270179	0.285609	0.217081	0.335141	0.238991	0.321207	0.122443	0.297164	0.17172	0.284317	0.327093	0.244298	0.224155	0.268424	0.335311	0.391448	0.364494	0.427593	0.327592	0.312877	0.406809	0.409085	0.374727	0.444982	0.382285	0.261068	0.396201	0.43251	0.373932	0.450576	0.286471	0.410066	0.363724	0.447184	0.388939	0.432863	0.343275	0.302282	0.313838	0.202328	0.15084	0.101144	0.31524	0.374102	0.442311
AATATTAA	0.287875	0.263678	0.430307	0.46398	0.219571	0.284933	0.137765	0.239793	0.286889	0.249721	0.157259	0.38489	0.122626	0.229336	0.202115	0.27971	0.0571308	0.270628	0.299661	0.35767	0.239058	0.352742	0.35646	0.385127	0.411985	0.416741	0.372932	0.416203	0.305029	0.251994	0.380489	0.40496	0.354876	0.403374	0.224731	0.38141	0.374361	0.429496	0.321409	0.429514	0.205658	0.413249	0.24419	0.271544	0.127588	0.163832	0.201879	0.364981	0.454728
AAATTATA	0.206672	0.158317	0.434406	0.474594	0.246633	0.247963	0.183544	0.311048	0.321488	0.239358	0.256126	0.297442	0.21105	0.323654	0.207976	0.290322	0.053717	0.297085	0.3958	0.406515	0.363154	0.41465	0.376956	0.322861	0.401553	0.407924	0.361829	0.438354	0.326612	0.219361	0.413324	0.417681	0.377416	0.424642	0.3348	0.385911	0.424243	0.429709	0.392264	0.42806	0.312463	0.321607	0.38559	0.238642	0.145374	0.166678	0.320278	0.328079	0.463115
ATAATTTC	0.296979	0.152122	0.402953	0.456364	0.125712	0.275963	0.133225	0.200657	0.327345	0.248685	0.100642	0.27363	0.0944985	0.226026	0.186371	0.293195	0.171163	0.262508	0.305221	0.347812	0.309945	0.424087	0.327812	0.357122	0.37837	0.40036	0.288673	0.412954	0.220362	0.263418	0.33091	0.402211	0.331429	0.412714	0.229695	0.340744	0.330452	0.416421	0.327735	0.366823	0.198291	0.342231	0.269825	0.296314	0.171288	0.266053	0.178492	0.355086	0.450463
AAAATATA	0.143511	0.238692	0.442191	0.455618	0.23015	0.203274	0.240465	0.288911	0.128382	0.312802	0.248092	0.324541	0.242914	0.268183	0.26247	0.212695	0.229373	0.254832	0.377599	0.393456	0.396372	0.407552	0.345179	0.296512	0.391517	0.391264	0.3852	0.393503	0.354471	0.17441	0.402262	0.418828	0.381374	0.420478	0.36435	0.375007	0.41249	0.432994	0.446964	0.446477	0.385224	0.313157	0.374935	0.20749	0.234944	0.142825	0.356227	0.302511	0.393059
AAATATAT	0.283711	0.250382	0.479533	0.48017	0.335103	0.404169	0.289952	0.33037	0.165941	0.34204	0.316129	0.290909	0.304673	0.344136	0.240916	0.381617	0.0821922	0.292662	0.405693	0.437676	0.408956	0.454075	0.392103	0.450631	0.43811	0.46146	0.41862	0.459908	0.350488	0.351179	0.433328	0.447548	0.448523	0.469126	0.423454	0.439987	0.458944	0.467083	0.447145	0.469002	0.400584	0.401963	0.41888	0.395593	0.268107	0.290559	0.353281	0.348747	0.429585
AATTTATA	0.304954	0.254641	0.473386	0.467931	0.297833	0.336377	0.27418	0.385279	0.324474	0.329121	0.18156	0.382079	0.189933	0.371791	0.241631	0.332693	0.195269	0.359261	0.409968	0.432538	0.394981	0.417967	0.415618	0.366918	0.427614	0.446009	0.428577	0.423742	0.326442	0.243252	0.427465	0.408617	0.412108	0.450483	0.38525	0.410783	0.446116	0.451633	0.421768	0.434769	0.372651	0.425338	0.381048	0.304798	0.287547	0.1909	0.392868	0.339774	0.454758
AAAAATAA	0.40555	0.395444	0.436246	0.471104	0.314781	0.402513	0.289604	0.397185	0.237433	0.382992	0.00130316	0.375763	0.313736	0.433885	0.308813	0.291729	0.300137	0.450442	0.378149	0.452894	0.415699	0.416475	0.410781	0.420609	0.409808	0.456763	0.330705	0.419488	0.354195	0.195188	0.380066	0.413161	0.372483	0.427765	0.26806	0.403885	0.397718	0.452711	0.3996	0.444524	0.392063	0.390046	0.29008	0.349192	0.240062	0.333858	0.347747	0.425575	0.443882
AATATATT	0.366626	0.0570769	0.453008	0.479002	0.141198	0.388974	0.263029	0.314211	0.0226393	0.30161	0.398158	0.246488	0.199855	0.307138	0.235838	0.373864	-0.0989018	0.34925	0.39069	0.47532	0.381997	0.43565	0.385936	0.458274	0.45492	0.463798	0.431186	0.451466	0.348093	0.388219	0.44363	0.447729	0.455589	0.449338	0.418671	0.427458	0.466177	0.468489	0.441758	0.470998	0.419649	0.47312	0.439662	0.331714	0.201963	0.36146	0.25911	0.388026	0.422365
ATATTAAT	0.372341	0.255965	0.405174	0.453196	0.321656	0.36377	0.211142	0.357075	0.285601	0.275324	0.176557	0.324993	0.0756658	0.343174	0.291269	0.383801	0.132267	0.352978	0.276285	0.432006	0.359454	0.394312	0.318564	0.416087	0.416867	0.430796	0.388247	0.411203	0.336281	0.27373	0.4062	0.424624	0.410712	0.432563	0.254347	0.405352	0.408357	0.44626	0.365302	0.438682	0.240326	0.424862	0.315954	0.384468	0.222219	0.315433	0.186434	0.337579	0.397708
AATAATAA	0.330509	0.334276	0.415533	0.47163	0.30111	0.352564	0.196357	0.328392	0.25534	0.322524	0.152506	0.384881	0.204666	0.327775	0.284894	0.299866	0.27915	0.245371	0.412077	0.421237	0.395552	0.442211	0.4089	0.418247	0.437466	0.437417	0.393804	0.448261	0.331643	0.2037	0.411134	0.44206	0.382215	0.421978	0.338703	0.413471	0.407841	0.453239	0.407646	0.447508	0.375768	0.389725	0.36938	0.271623	0.316371	0.220421	0.273915	0.374417	0.430007
AAAATAAA	0.395592	0.24351	0.351342	0.458529	0.20782	0.327361	0.144097	0.343672	0.0477588	0.0701553	0.0123357	0.289403	0.087275	0.35092	0.121118	0.332515	0.0540995	0.411688	0.295717	0.447508	0.132152	0.425079	0.285408	0.408907	0.313738	0.437695	0.244954	0.429511	0.115	0.174159	0.311608	0.431032	0.176707	0.422956	0.0779466	0.406236	0.305625	0.454646	0.342114	0.437622	0.251209	0.436515	0.189765	0.305152	0.156665	0.338412	0.19881	0.366146	0.41926
ATAAATTA	0.320828	0.234903	0.406019	0.46756	0.181717	0.356361	0.155957	0.388331	0.31323	0.167087	0.212002	0.376679	0.0476472	0.355951	0.204871	0.353584	0.0840803	0.313111	0.345031	0.444598	0.224769	0.418156	0.230115	0.403241	0.367017	0.454134	0.343642	0.44216	0.26128	0.278041	0.375356	0.431464	0.253962	0.443131	0.26921	0.429636	0.370141	0.454876	0.269433	0.447409	0.213245	0.434299	0.280229	0.324882	0.10711	0.30041	0.25185	0.368554	0.432933
AATAAATT	0.298003	0.160244	0.407783	0.482955	0.264651	0.331725	0.195963	0.30492	0.296013	0.266063	0.269516	0.419316	0.100192	0.321128	0.15941	0.333405	0.143026	0.340255	0.412513	0.469519	0.254701	0.433404	0.292719	0.432527	0.310034	0.448676	0.373331	0.436658	0.240491	0.297803	0.385142	0.441321	0.309755	0.438568	0.33281	0.417076	0.383623	0.459259	0.33571	0.459207	0.318761	0.443937	0.342892	0.252805	0.154834	0.267996	0.163304	0.423476	0.476865
AAATAAAT	0.301252	0.155007	0.41423	0.46786	0.191476	0.373965	0.10157	0.29959	0.24084	0.143883	0.138508	0.368323	0.104373	0.303263	0.116129	0.368345	-0.0342845	0.327862	0.399223	0.441098	0.261324	0.416553	0.327339	0.445549	0.408184	0.429122	0.356955	0.446156	0.255263	0.270432	0.397753	0.438762	0.360759	0.437804	0.27197	0.416106	0.363571	0.448891	0.385407	0.435809	0.35624	0.420124	0.328356	0.267834	0.18201	0.254851	0.173825	0.385315	0.442077
AACAAAAT	0.189214	0.277217	0.446627	0.414718	0.305916	0.323681	0.357971	0.34599	0.236382	0.374984	0.296563	0.406535	0.327699	0.301279	0.36172	0.325046	0.263401	0.333064	0.338668	0.295822	0.36462	0.381925	0.375493	0.356159	0.377318	0.370831	0.386136	0.416028	0.35713	0.194552	0.419695	0.456749	0.391302	0.397238	0.3456	0.409941	0.404438	0.415428	0.367915	0.387721	0.274123	0.371489	0.35355	0.239745	0.309955	0.131027	0.335348	0.296818	0.431245
TAACAAAA	0.338833	0.261806	0.405014	0.415862	0.287253	0.326944	0.259489	0.29267	0.263745	0.27342	0.288825	0.355072	0.28577	0.313622	0.345475	0.310206	0.307136	0.298228	0.314702	0.311654	0.421366	0.42507	0.394391	0.377352	0.383665	0.381658	0.383053	0.426253	0.417214	0.30353	0.410595	0.454772	0.408965	0.396405	0.298007	0.427225	0.387595	0.431637	0.372913	0.376169	0.316847	0.397739	0.352562	0.309803	0.199197	0.240035	0.355873	0.39388	0.410475
ACAATTAT	0.053258	0.120009	0.401637	0.44843	0.226187	0.265042	0.286459	0.302947	0.318445	0.288126	0.233488	0.374855	0.230324	0.226701	0.287537	0.225565	0.0444699	0.0477938	0.294244	0.359422	0.302903	0.418457	0.307328	0.331285	0.411691	0.38762	0.3759	0.461721	0.351998	0.172958	0.397869	0.442825	0.351119	0.379825	0.354785	0.448787	0.418103	0.453005	0.365174	0.433724	0.259984	0.289251	0.345042	0.132283	0.266897	0.0126939	0.24493	0.442039	0.429257
ACAAAATA	0.307842	0.270459	0.419608	0.428069	0.250496	0.322141	0.31056	0.31629	0.16561	0.302022	0.339202	0.326818	0.271592	0.273912	0.279458	0.338716	0.243944	0.328529	0.36501	0.407587	0.309777	0.347608	0.359872	0.398849	0.413524	0.41724	0.391471	0.433155	0.347617	0.294259	0.419036	0.450749	0.407881	0.415228	0.373869	0.403185	0.413385	0.440991	0.416078	0.436267	0.34313	0.432448	0.392319	0.353994	0.290339	0.296378	0.311082	0.409646	0.464646
ATACATAA	0.282411	0.108545	0.244277	0.215016	0.257268	0.375842	0.401675	0.375597	0.320151	0.352173	0.342962	0.345399	0.278734	0.267027	0.353628	0.330188	0.308001	0.286457	0.311515	0.393769	0.304292	0.376699	0.286902	0.422586	0.347033	0.400706	0.274968	0.402078	0.275802	0.347092	0.377181	0.457005	0.356485	0.370266	0.429499	0.465755	0.422807	0.44829	0.423484	0.455981	0.382806	0.404023	0.429897	0.388318	0.227006	0.279774	0.24707	0.304947	0.208149
ATTATGTA	0.288094	0.0308399	0.287059	0.304068	0.291315	0.335711	0.330562	0.336764	0.327325	0.317111	0.322267	0.297549	0.305834	0.260934	0.291856	0.354892	0.259926	0.274561	0.346742	0.385157	0.334242	0.384449	0.329676	0.39098	0.405566	0.361748	0.352269	0.406739	0.217795	0.250738	0.406841	0.453935	0.35649	0.35745	0.41	0.446077	0.417365	0.439088	0.386996	0.426179	0.350322	0.374317	0.399502	0.36819	0.234377	0.227731	0.238056	0.232	0.241807
ATACATTC	0.315138	0.145	0.321036	0.366768	0.409751	0.395348	0.455243	0.444562	0.280408	0.396987	0.364835	0.245862	0.377209	0.384315	0.369026	0.386154	0.190301	0.395707	0.326994	0.451767	0.412707	0.46257	0.416963	0.423686	0.448723	0.461659	0.432232	0.458453	0.427312	0.440944	0.415802	0.468211	0.446917	0.466869	0.435257	0.487527	0.480098	0.490894	0.461303	0.490552	0.404287	0.456962	0.455035	0.426407	0.321766	0.393083	0.302172	0.364166	0.345151
ATACATTA	0.34491	0.264578	0.349721	0.409844	0.380288	0.448763	0.46237	0.471317	0.304673	0.349387	0.392078	0.31457	0.360444	0.444246	0.401024	0.448877	0.279295	0.444249	0.326182	0.477113	0.3646	0.461446	0.433272	0.465919	0.432143	0.455826	0.438135	0.473714	0.402218	0.43481	0.420852	0.461502	0.41809	0.464836	0.44215	0.488873	0.475112	0.488248	0.459305	0.493913	0.38938	0.475329	0.455616	0.439835	0.244577	0.379833	0.259722	0.371892	0.357326
ATAATGTA	0.290938	0.228335	0.387388	0.390259	0.359642	0.446534	0.422534	0.451758	0.325837	0.350813	0.365301	0.30864	0.357459	0.410164	0.336292	0.415192	0.299388	0.384579	0.391154	0.442986	0.373203	0.436889	0.389646	0.452729	0.390707	0.426006	0.438395	0.455899	0.376466	0.385755	0.436608	0.443439	0.402595	0.427566	0.442942	0.456377	0.460119	0.469039	0.446733	0.471667	0.397702	0.434564	0.453568	0.396301	0.346176	0.327956	0.373191	0.335279	0.303214
ACACATTA	0.227422	0.244186	0.350074	0.353183	0.226285	0.408262	0.3251	0.401804	0.185194	0.2813	0.271814	0.123731	0.310001	0.329621	0.197459	0.384592	0.180042	0.324522	0.317128	0.336535	0.270728	0.377566	0.273993	0.422916	0.297103	0.414504	0.340633	0.398344	0.275234	0.286475	0.352003	0.419853	0.274721	0.368695	0.383307	0.457291	0.383609	0.450065	0.374679	0.435207	0.324851	0.381057	0.384331	0.44923	0.315427	0.336836	0.26702	0.332231	0.291435
GTAATACA	0.264729	0.0274457	0.166086	0.285088	0.21775	0.418632	0.321409	0.408208	0.300133	0.222084	0.291241	0.308335	0.118888	0.337336	0.227579	0.379822	0.174021	0.34855	0.268417	0.389402	0.279149	0.382737	0.294337	0.439444	0.252654	0.399235	0.302948	0.381281	0.157634	0.346694	0.255873	0.370876	0.250336	0.355797	0.358208	0.458907	0.36975	0.43266	0.370455	0.439088	0.348915	0.417943	0.42342	0.442284	0.18676	0.341938	0.214758	0.371108	0.253246
TTATACAA	0.214796	0.190256	0.296795	0.360263	0.235036	0.32611	0.302168	0.363096	0.296737	0.276895	0.22622	0.397842	0.282959	0.347951	0.254818	0.288735	0.0303285	0.171544	0.325459	0.375521	0.343126	0.360866	0.355241	0.36047	0.362104	0.364054	0.360552	0.393039	0.291277	0.218205	0.37329	0.398274	0.337505	0.31789	0.350115	0.451823	0.394277	0.453014	0.434218	0.45991	0.319061	0.353624	0.415134	0.283508	0.139391	0.0760794	0.388318	0.414384	0.37788
ATACACTC	0.107321	0.148862	0.12445	0.180457	0.162679	0.324556	0.262315	0.345817	0.173397	0.177736	0.269115	0.229329	0.0930789	0.28938	0.178255	0.325291	0.0282568	0.152796	0.101624	0.217148	0.112151	0.344722	0.138746	0.329907	0.153174	0.327434	0.272147	0.38861	0.158394	0.326164	0.091167	0.369007	0.212278	0.390391	0.256652	0.458766	0.224949	0.426694	0.25091	0.430545	0.0992591	0.349811	0.263026	0.350713	0.18091	0.130624	0.149409	0.173784	0.209434
ATACATCC	0.256732	0.00510749	0.0812386	0.225339	0.139955	0.359129	0.38174	0.356888	0.279003	0.247807	0.142337	0.184749	0.174944	0.301204	0.314691	0.382931	0.238807	0.224114	-0.074688	0.271345	0.268611	0.321074	0.135727	0.367848	0.249922	0.30585	0.195692	0.366691	0.298069	0.303917	0.306314	0.368391	0.28876	0.374273	0.362825	0.452381	0.389629	0.422224	0.29805	0.419841	0.0870963	0.350301	0.340452	0.422991	0.128251	0.297318	0.194707	0.300177	0.121019
ATAATACA	0.260435	0.179824	0.33433	0.295978	0.288286	0.382742	0.289923	0.369623	0.237793	0.30791	0.274633	0.330481	0.264891	0.293741	0.197589	0.326013	0.00419052	0.362558	0.333792	0.397051	0.233942	0.365877	0.299972	0.408884	0.287622	0.420957	0.342749	0.395826	0.166551	0.34075	0.340345	0.357885	0.246015	0.362408	0.395011	0.452101	0.404427	0.447584	0.381035	0.433683	0.303308	0.408269	0.39662	0.390756	0.256537	0.294588	0.27769	0.306269	0.33315
ATACATCA	0.0693467	-0.0563802	0.127728	0.21125	0.20962	0.37301	0.353762	0.381089	0.310734	0.289318	0.293371	0.166369	0.246696	0.268831	0.307999	0.275716	0.17187	0.194264	0.26379	0.229463	0.313194	0.314976	0.271357	0.372683	0.296707	0.32629	0.306974	0.336894	0.318758	0.360403	0.352159	0.346106	0.384899	0.344208	0.398049	0.45356	0.388274	0.426375	0.366347	0.41199	0.280511	0.367927	0.400201	0.349171	0.139858	0.237909	0.105204	0.182541	0.170987
ATACAATC	0.158494	0.139946	0.172244	0.153463	0.172214	0.287632	0.267	0.314277	0.299545	0.189245	0.220506	0.331965	0.271412	0.260586	0.164327	0.267434	0.077813	0.103759	0.295342	0.330674	0.303725	0.362439	0.364068	0.354887	0.302632	0.331068	0.390451	0.424659	0.367468	0.332693	0.380334	0.387001	0.3095	0.391212	0.404711	0.459137	0.409639	0.452051	0.400389	0.424068	0.293538	0.354344	0.407135	0.342101	0.229577	0.217463	0.180647	0.244584	0.157848
TAATACAA	0.251349	0.267338	0.349009	0.262169	0.269257	0.336114	0.323979	0.381095	0.25844	0.316052	0.267481	0.330766	0.221794	0.321538	0.260703	0.31163	0.250298	0.378924	0.371207	0.38653	0.320281	0.377221	0.399896	0.351828	0.365439	0.359593	0.321418	0.407188	0.208184	0.283082	0.34259	0.386331	0.351882	0.368328	0.407778	0.471322	0.418324	0.456002	0.397465	0.450759	0.343811	0.399276	0.415723	0.355988	0.272149	0.218828	0.308218	0.310926	0.321175
TACATTAA	0.237238	0.0789708	0.28275	0.353764	0.255414	0.336109	0.394256	0.436422	0.241829	0.29353	0.331973	0.197539	0.265681	0.356088	0.328216	0.362254	0.0647449	0.347421	0.300763	0.392724	0.329142	0.366962	0.336099	0.352107	0.398703	0.385646	0.384581	0.392978	0.319208	0.241836	0.366641	0.379889	0.368582	0.368206	0.396136	0.444845	0.411798	0.445449	0.393165	0.450144	0.309582	0.416148	0.425178	0.359279	0.174666	0.3385	0.21942	0.338678	0.30961
ATGTATAG	0.153567	-0.0559557	0.1144	0.279365	0.210098	0.40686	0.388795	0.438979	0.341002	0.188356	0.266037	0.373921	0.265556	0.348586	0.238236	0.376677	0.0681258	0.347364	0.233634	0.338646	0.210714	0.356441	0.282755	0.39056	0.207647	0.37021	0.216453	0.354231	0.16707	0.143139	0.244553	0.349025	0.254621	0.285308	0.345417	0.4645	0.409619	0.453332	0.403128	0.47304	0.237876	0.428273	0.403844	0.38143	0.162784	0.198773	0.112835	0.30088	0.22704
TGTATTAA	0.312968	0.209836	0.245796	0.359445	0.273749	0.378346	0.314812	0.415056	0.26341	0.30462	0.267074	0.341466	0.243757	0.396975	0.334878	0.379644	0.263835	0.351685	0.26553	0.403491	0.300443	0.36979	0.356993	0.390785	0.355773	0.407266	0.261334	0.406662	0.267852	0.276484	0.258041	0.403225	0.32769	0.379019	0.37607	0.456772	0.418777	0.449613	0.358013	0.461335	0.320191	0.413473	0.403242	0.379921	0.244122	0.319277	0.281837	0.371655	0.327204
AGTGTATA	0.160942	0.0173913	0.126792	0.22524	0.234353	0.351689	0.34593	0.393807	0.161107	0.214409	0.342779	0.205077	0.257873	0.271151	0.273245	0.307573	0.145835	0.256336	0.225389	0.267393	0.241448	0.280224	0.268935	0.340295	0.275631	0.311041	0.315184	0.273286	0.176429	0.205201	0.271557	0.271297	0.285297	0.233164	0.401403	0.437781	0.407695	0.413158	0.402519	0.450322	0.342781	0.396933	0.417921	0.394208	0.285925	0.287912	0.171575	0.272916	0.0253438
AATACATA	0.200221	0.0351111	0.229351	0.221901	0.280601	0.365837	0.380432	0.397123	0.235556	0.319392	0.355343	0.243213	0.259793	0.303166	0.333981	0.344287	0.283729	0.364854	0.264488	0.361702	0.250673	0.257296	0.252131	0.358809	0.350331	0.365562	0.255627	0.326731	0.179668	0.249243	0.336613	0.377766	0.30386	0.313147	0.385148	0.465785	0.41077	0.440798	0.413791	0.446585	0.342047	0.402154	0.429298	0.400221	0.181197	0.30133	0.1742	0.246473	0.163549
ATGTATTG	0.0448538	0.0961922	0.120699	0.0826515	0.258043	0.35694	0.392764	0.391926	0.151082	0.320435	0.285829	0.185277	0.306349	0.378	0.338508	0.347504	0.224994	0.314315	0.0716531	0.250108	0.260796	0.138284	0.137499	0.321756	0.325889	0.282097	0.277936	0.262037	0.210463	0.0907214	0.301165	0.245392	0.254769	0.226215	0.388016	0.451662	0.421433	0.419152	0.404415	0.435695	0.339894	0.396005	0.417479	0.371328	0.243515	0.210625	0.179482	0.155961	0.0639453
ACATACAT	0.170671	0.162653	0.234112	0.270742	0.335015	0.436031	0.444079	0.464658	0.297456	0.382748	0.389069	0.275993	0.327673	0.406688	0.416473	0.426092	0.33822	0.381696	0.332361	0.354246	0.205641	0.308268	0.336996	0.400189	0.336968	0.331665	0.305159	0.375346	0.16976	0.0927797	0.326479	0.405786	0.279504	0.386087	0.424668	0.47165	0.45234	0.464179	0.439808	0.478742	0.302177	0.425809	0.454035	0.417336	0.308454	0.283485	0.241649	0.320769	0.237851
AATACATT	0.280519	0.180878	0.343055	0.382224	0.354341	0.443374	0.444291	0.457026	0.273325	0.383977	0.357151	0.327274	0.413958	0.446293	0.32816	0.427762	0.208206	0.392921	0.410443	0.40449	0.350071	0.416416	0.389196	0.445324	0.425868	0.435499	0.422474	0.436242	0.319949	0.350149	0.422309	0.442693	0.390228	0.392499	0.45231	0.482853	0.476734	0.48292	0.466421	0.486009	0.384665	0.452252	0.459365	0.438007	0.31184	0.361159	0.372204	0.388686	0.355843
ATGTATTA	0.280014	0.121403	0.279985	0.333078	0.332853	0.421263	0.404555	0.452232	0.262061	0.356333	0.337909	0.292521	0.336514	0.394715	0.351539	0.410189	0.193045	0.381003	0.353352	0.437806	0.352845	0.396268	0.370132	0.441012	0.380676	0.423663	0.344057	0.423181	0.278949	0.298574	0.359041	0.414697	0.339057	0.395086	0.447752	0.480071	0.451616	0.470506	0.443405	0.476123	0.403253	0.411733	0.456102	0.424916	0.244838	0.368099	0.310533	0.369749	0.297079
ACATGTAA	0.105639	0.127779	0.405149	0.327694	0.321228	0.437152	0.396057	0.422723	0.377591	0.336058	0.26971	0.375982	0.345266	0.381121	0.324969	0.434565	0.112813	0.321651	0.199377	0.280933	0.31847	0.390124	0.299263	0.403506	0.340243	0.399509	0.409586	0.392973	0.383027	0.275383	0.366062	0.414031	0.285123	0.35661	0.429499	0.458976	0.437243	0.453662	0.424798	0.430247	0.333517	0.402224	0.434288	0.41587	0.286521	0.330062	0.340943	0.373737	0.170483
AGTATACA	0.212631	0.0810542	0.244072	0.339796	0.328287	0.440268	0.418258	0.420011	0.358291	0.344574	0.343904	0.32847	0.313588	0.358465	0.316563	0.406626	0.143137	0.305723	0.274111	0.350255	0.311717	0.336596	0.304481	0.42857	0.333435	0.385726	0.418703	0.384435	0.311437	0.282642	0.373779	0.363423	0.389218	0.39225	0.411046	0.451698	0.435687	0.437444	0.44248	0.450424	0.317353	0.39669	0.431977	0.420356	0.348194	0.280745	0.266611	0.270194	0.279239
CTATTGTA	0.321196	0.228444	0.246685	0.304097	0.214585	0.411147	0.273446	0.310197	0.239264	0.157185	0.235139	0.235123	0.228094	0.247732	0.248769	0.329674	0.0918586	0.306575	0.270014	0.374321	0.198607	0.437356	0.249578	0.401869	0.213704	0.405573	0.382251	0.422727	0.202217	0.376117	0.289554	0.433398	0.292386	0.407104	0.323602	0.454116	0.330218	0.452707	0.275868	0.438925	0.299188	0.421213	0.336442	0.398218	0.243617	0.325956	0.227115	0.422904	0.310861
CTAATGTA	0.327116	0.0483655	0.151636	0.312138	0.14789	0.357685	0.417325	0.406236	0.231647	0.240763	0.253716	0.32316	0.215021	0.360053	0.321906	0.368578	0.255292	0.29638	0.158541	0.333539	0.114447	0.40212	0.16852	0.381267	0.246859	0.357323	0.193591	0.43478	0.187801	0.405555	0.25477	0.416618	0.239782	0.404532	0.205616	0.441689	0.341536	0.450422	0.252184	0.431908	0.235148	0.40599	0.313544	0.366876	0.0553525	0.333382	0.127689	0.343589	0.237914
CTACATTA	0.308795	0.0569727	0.158812	0.300815	0.313732	0.355653	0.406093	0.418136	0.276031	0.329207	0.300968	0.262195	0.264282	0.341916	0.366595	0.373606	0.245926	0.330243	0.331436	0.388373	0.257477	0.400821	0.278045	0.367463	0.300567	0.375439	0.271825	0.440249	0.290821	0.314203	0.316611	0.422101	0.313788	0.409465	0.331189	0.417727	0.366282	0.451049	0.254743	0.41446	0.282659	0.382207	0.370379	0.344199	0.13944	0.355075	0.239215	0.385894	0.218228
AAAAGTAT	0.216198	0.139632	0.364565	0.424042	0.193304	0.187633	0.382562	0.423639	0.2492	0.236673	0.0884154	0.294949	0.31442	0.342217	0.299712	0.1834	0.250506	0.32108	0.319061	0.402197	0.354785	0.431452	0.334877	0.293049	0.377621	0.37611	0.314202	0.445207	0.36659	0.0495523	0.394798	0.424633	0.396964	0.453358	0.287849	0.437061	0.425001	0.45311	0.41634	0.443569	0.362287	0.399172	0.365387	0.105669	0.0788299	0.0648651	0.177318	0.354914	0.421216
ATACTTTC	0.288543	0.191173	0.351866	0.426612	0.248444	0.375404	0.416346	0.418034	0.324494	0.325943	0.238342	0.228444	0.267186	0.383366	0.299246	0.382987	0.252326	0.353336	0.277956	0.338348	0.377865	0.443505	0.363224	0.406639	0.405453	0.418451	0.393697	0.450014	0.328351	0.396207	0.393519	0.447651	0.394078	0.476672	0.309227	0.455896	0.425339	0.468926	0.399935	0.446915	0.248858	0.388309	0.408415	0.366888	0.133535	0.278898	0.220385	0.266069	0.351749
AATTGTAT	0.152089	-0.0235193	0.364219	0.341259	0.136869	0.297058	0.37001	0.369232	0.343221	0.245727	0.208858	0.367696	0.291269	0.292314	0.247926	0.227378	0.0407813	0.194036	0.406943	0.307587	0.36484	0.424101	0.329657	0.237471	0.416188	0.346298	0.441194	0.463087	0.398923	0.193709	0.438407	0.430323	0.421458	0.428442	0.430731	0.458991	0.462564	0.460772	0.460098	0.45229	0.304774	0.32241	0.410793	0.184871	0.180691	0.00845455	0.233532	0.226251	0.346187
AAAGTATA	0.130852	0.262498	0.395017	0.425794	0.314831	0.29841	0.413417	0.440223	0.281246	0.352834	0.303267	0.317078	0.360376	0.396344	0.336861	0.31427	0.245457	0.246493	0.402473	0.385597	0.40763	0.423686	0.3898	0.349437	0.409446	0.389991	0.356945	0.451511	0.289969	0.220358	0.394067	0.423762	0.393755	0.43936	0.353814	0.442868	0.451168	0.458585	0.456629	0.464445	0.401005	0.381179	0.439604	0.283777	0.216961	0.185449	0.286935	0.251	0.373279
GTATACAC	0.235229	0.0224067	0.0266538	0.245973	0.20295	0.39054	0.399271	0.36722	0.230047	0.201121	0.338567	0.173993	0.145348	0.330769	0.311698	0.391778	0.170935	0.324675	0.203539	0.272679	0.229898	0.31824	0.177854	0.382511	0.176945	0.367302	0.202629	0.251986	0.158775	0.262995	0.247068	0.278014	0.287801	0.29698	0.375195	0.429567	0.401471	0.405202	0.405945	0.408236	0.358584	0.395281	0.442688	0.456141	0.313235	0.363956	0.170051	0.28437	0.19932
GTAATGTA	0.197132	0.268632	0.29757	0.305056	0.375407	0.444449	0.434799	0.443745	0.292219	0.374006	0.285149	0.268226	0.40312	0.374851	0.359287	0.42115	0.230982	0.358215	0.361707	0.360949	0.372114	0.36227	0.36052	0.40145	0.374642	0.392749	0.363865	0.382318	0.406586	0.367093	0.400326	0.385332	0.359498	0.342848	0.417848	0.443508	0.455405	0.442267	0.429332	0.422526	0.339045	0.375465	0.431687	0.452644	0.29361	0.312077	0.401363	0.303984	0.192047
ATGTACAT	0.0991444	0.246642	0.36377	0.149657	0.293794	0.369603	0.429107	0.436494	0.256923	0.388084	0.362881	0.294332	0.344206	0.311733	0.33514	0.405005	0.310109	0.259881	0.316412	0.222309	0.237181	0.194737	0.319239	0.314454	0.325412	0.313246	0.381177	0.313729	0.205354	-0.0283367	0.346444	0.299713	0.348558	0.274564	0.429975	0.438164	0.421148	0.408842	0.408514	0.402414	0.417276	0.242447	0.467778	0.432348	0.416082	0.286879	0.241654	0.163163	0.0834277
AACATACA	0.261162	0.328078	0.384074	0.310353	0.424452	0.425865	0.449066	0.456855	0.326452	0.445317	0.36465	0.28679	0.415441	0.430283	0.443245	0.392521	0.31147	0.358167	0.368851	0.292534	0.384352	0.338122	0.397875	0.347829	0.368248	0.354601	0.389903	0.333784	0.353518	0.285386	0.406621	0.363674	0.396299	0.326455	0.436894	0.452765	0.453416	0.439069	0.412859	0.450921	0.375276	0.37686	0.465373	0.431149	0.375016	0.372732	0.330646	0.368364	0.24772
ATACAACA	0.125252	0.0858663	0.284803	0.210857	0.399394	0.376194	0.434634	0.399649	0.332623	0.431826	0.39255	0.372741	0.377121	0.310033	0.417257	0.35885	0.279345	0.262818	0.34203	0.280387	0.36709	0.342935	0.342562	0.372674	0.3659	0.343504	0.389526	0.377042	0.330106	0.354088	0.391619	0.390493	0.386049	0.3662	0.436275	0.457718	0.43813	0.44523	0.410301	0.423946	0.412602	0.39522	0.449664	0.405874	0.31145	0.257964	0.346513	0.357593	0.196194
ACATACAA	0.214028	0.304681	0.37121	0.318223	0.405137	0.404544	0.404183	0.425077	0.327563	0.416374	0.310058	0.357502	0.331869	0.36813	0.394617	0.372244	0.234059	0.233069	0.420859	0.319969	0.362481	0.320917	0.343317	0.334372	0.385597	0.345374	0.391432	0.310252	0.285726	0.293871	0.363259	0.345016	0.380437	0.289355	0.447947	0.435746	0.43286	0.424349	0.443037	0.439416	0.3837	0.324368	0.452444	0.393265	0.34892	0.321	0.37264	0.354097	0.274295
CATGTATA	0.115	-0.037756	0.215622	0.113759	0.328207	0.402093	0.414751	0.405824	0.265518	0.296927	0.388499	0.204844	0.367933	0.247422	0.329671	0.407295	0.152483	0.335361	0.359443	0.270031	0.263711	0.218597	0.32838	0.390058	0.333535	0.303485	0.367253	0.185713	0.265673	0.291232	0.358087	0.301636	0.309798	0.321614	0.4383	0.444854	0.442394	0.417584	0.44659	0.42884	0.380546	0.32756	0.455463	0.437426	0.288033	0.235514	0.292248	0.204148	0.142384
TACATACA	0.233293	0.261438	0.271406	0.208106	0.324999	0.413071	0.417307	0.428091	0.292148	0.366795	0.37935	0.3142	0.269909	0.312226	0.369137	0.379427	0.344219	0.330985	0.32798	0.313881	0.321537	0.269374	0.368142	0.366126	0.361599	0.356593	0.364725	0.394923	0.258666	0.245325	0.34419	0.364181	0.403611	0.330772	0.450111	0.459551	0.442389	0.442162	0.432509	0.445417	0.35524	0.371328	0.461954	0.413579	0.358225	0.273888	0.328167	0.293669	0.22419
TATATACA	0.19476	0.0119184	0.303761	0.16673	0.256103	0.406841	0.363579	0.364138	0.253015	0.27469	0.354013	0.305873	0.223052	0.294913	0.29506	0.390421	0.28628	0.231583	0.316919	0.344602	0.372642	0.370875	0.325884	0.413122	0.356153	0.371218	0.35432	0.378186	0.267473	0.25435	0.383895	0.392315	0.410946	0.375308	0.453073	0.454782	0.458707	0.439569	0.443682	0.43636	0.407154	0.368389	0.467841	0.418882	0.273125	0.269723	0.201933	0.254773	0.233531
ATACATAC	0.142643	0.110885	0.247275	0.140567	0.306854	0.363708	0.413395	0.431153	0.264615	0.35104	0.334675	0.178404	0.29726	0.355472	0.360768	0.381562	0.317685	0.33663	0.260284	0.314579	0.320003	0.259183	0.31468	0.303861	0.365219	0.22317	0.310962	0.329702	0.258271	0.278494	0.36635	0.335183	0.386493	0.390277	0.448619	0.467481	0.423215	0.436877	0.462949	0.448045	0.350718	0.379991	0.454104	0.385276	0.333676	0.25496	0.278899	0.183674	0.0283213
ATACATAG	0.135324	0.150548	0.254432	0.219214	0.339254	0.333454	0.410684	0.422166	0.327285	0.367132	0.354278	0.267657	0.308899	0.369518	0.336552	0.344568	0.325021	0.330906	0.350581	0.341469	0.364391	0.381005	0.332236	0.342176	0.376089	0.365381	0.408047	0.36377	0.361215	0.235028	0.392926	0.415465	0.419703	0.370693	0.456399	0.469535	0.439346	0.450562	0.44069	0.434709	0.411793	0.326797	0.452378	0.32182	0.299087	0.195249	0.295529	0.225903	0.139418
TGTATACA	0.0826904	0.0138489	0.205918	0.0495312	0.365993	0.32523	0.457852	0.442829	0.176655	0.397567	0.436093	0.0905539	0.391175	0.376002	0.387067	0.28288	0.273695	0.257318	0.385644	0.336486	0.40356	0.362991	0.39724	0.331593	0.408141	0.381757	0.456137	0.358737	0.40251	0.227048	0.427577	0.354191	0.432524	0.38225	0.484692	0.481594	0.486048	0.46671	0.489118	0.466177	0.479996	0.410153	0.494303	0.480639	0.439981	0.381912	0.315174	0.333304	0.0695991
ATACAATA	0.152702	0.114314	0.285025	0.250122	0.246645	0.373404	0.400467	0.354908	0.251541	0.353345	0.339489	0.262353	0.35916	0.291356	0.271993	0.36967	0.156502	0.247671	0.399076	0.251994	0.419211	0.396288	0.399984	0.385588	0.405503	0.361983	0.471355	0.453957	0.406848	0.27879	0.452422	0.434807	0.431491	0.414241	0.470161	0.473367	0.480397	0.457437	0.473457	0.437479	0.380217	0.351951	0.474346	0.409593	0.348721	0.237577	0.346078	0.234428	0.238882
ATTGTATA	0.195834	0.082337	0.309339	0.266934	0.293568	0.425494	0.413231	0.422562	0.362	0.349685	0.393089	0.346581	0.385349	0.372995	0.266699	0.384487	0.162206	0.241528	0.41061	0.35779	0.375778	0.350489	0.362392	0.399018	0.379529	0.396084	0.457886	0.42561	0.354608	0.0525164	0.424408	0.367872	0.354535	0.372374	0.464619	0.468211	0.470436	0.457545	0.473885	0.46492	0.406725	0.361334	0.470375	0.375921	0.327527	0.196874	0.334687	0.316214	0.275136
AATGTAAT	0.105297	0.252806	0.406624	0.322263	0.259841	0.272304	0.416033	0.364661	0.0888147	0.318328	0.211082	0.192588	0.343508	0.210515	0.239056	0.270247	0.228814	0.233186	0.404382	0.313977	0.390318	0.290879	0.377985	0.249041	0.384764	0.25185	0.421318	0.355379	0.409868	0.0253741	0.428443	0.368185	0.385828	0.224067	0.419398	0.442041	0.460332	0.4151	0.459081	0.427644	0.362677	0.331771	0.440856	0.325867	0.189815	0.0930724	0.360793	0.228886	0.139074
GTATACAA	0.0197139	0.0580851	0.159069	0.200472	0.298888	0.320984	0.422094	0.350459	0.296664	0.32676	0.340777	0.175171	0.359754	0.251487	0.330413	0.323962	0.284284	0.243916	0.346348	0.266019	0.36239	0.324283	0.320871	0.307775	0.299618	0.339597	0.418332	0.318442	0.361748	0.0921679	0.427567	0.290672	0.294901	0.359802	0.424821	0.443641	0.466632	0.412389	0.457976	0.417422	0.392693	0.368582	0.456692	0.383029	0.366886	0.287749	0.337072	0.24419	0.142877
ATGTATAA	0.221691	0.203693	0.377306	0.274729	0.408718	0.390362	0.443627	0.373553	0.267231	0.383707	0.387208	0.350578	0.368842	0.266312	0.38218	0.327528	0.24001	0.198859	0.431266	0.318506	0.372743	0.275252	0.414587	0.379597	0.41699	0.335353	0.409511	0.350259	0.332211	0.351923	0.413109	0.335361	0.415299	0.338431	0.443498	0.447715	0.476276	0.443452	0.467925	0.444147	0.42363	0.359714	0.470035	0.398773	0.326081	0.21953	0.425312	0.381973	0.214748
ATTATACA	0.134999	0.230101	0.357168	0.33802	0.366372	0.329812	0.346942	0.348063	0.235573	0.332743	0.284098	0.345487	0.316653	0.245023	0.342438	0.308756	0.0515708	0.207544	0.379682	0.338263	0.368323	0.280527	0.376391	0.294905	0.391861	0.291566	0.416612	0.34889	0.324815	0.189341	0.391477	0.345344	0.394128	0.316944	0.418061	0.431505	0.452274	0.429034	0.463597	0.419357	0.400058	0.308674	0.450161	0.313348	0.315934	0.148781	0.392034	0.383443	0.292721
TACATGTA	-0.0636505	-0.0176564	0.353638	0.0482319	0.389609	0.359101	0.416835	0.406031	0.30888	0.369658	0.394621	0.180523	0.371016	0.316113	0.374704	0.328847	0.192276	0.178855	0.336514	0.188891	0.37858	0.323519	0.3433	0.270738	0.375543	0.297877	0.410877	0.270636	0.364226	0.134643	0.383753	0.273335	0.352621	0.146248	0.44944	0.434471	0.448337	0.397938	0.462745	0.35995	0.409765	0.30823	0.470436	0.398307	0.384572	0.268335	0.30886	0.243494	0.000279781
ATACATAT	0.12449	-0.00214758	0.300167	0.289777	0.343057	0.408744	0.404315	0.367314	0.256306	0.335158	0.368591	0.179931	0.32324	0.319861	0.32624	0.401795	0.174844	0.313658	0.38839	0.201753	0.350085	0.194985	0.386464	0.392969	0.425822	0.355381	0.41075	0.312781	0.348876	0.228038	0.440234	0.367734	0.385922	0.35401	0.456775	0.45295	0.468948	0.428892	0.453845	0.440912	0.39118	0.367219	0.469164	0.370304	0.303628	0.334573	0.205398	0.279179	0.0419108
ACATGTAT	-0.121467	-0.0686417	0.292989	0.193816	0.362063	0.3616	0.442021	0.428766	0.322208	0.384226	0.424167	0.191661	0.335838	0.311274	0.406175	0.338654	0.340223	0.253095	0.369671	0.247433	0.402067	0.279403	0.378326	0.346146	0.416052	0.315697	0.421126	0.313065	0.403659	0.151244	0.418503	0.335706	0.429411	0.331857	0.470482	0.458647	0.472096	0.443836	0.470293	0.443417	0.427024	0.306363	0.483018	0.375694	0.313478	0.240724	0.280571	0.203955	0.0706643
TATACATA	0.191014	0.0745456	0.325221	0.271582	0.373951	0.403453	0.448824	0.426594	0.333402	0.411886	0.418636	0.318197	0.359395	0.348126	0.365315	0.39061	0.284781	0.292565	0.390668	0.358362	0.330374	0.338687	0.38326	0.389159	0.413246	0.363472	0.408639	0.356502	0.262754	0.290088	0.404276	0.352514	0.417284	0.355694	0.470199	0.462839	0.476379	0.447341	0.478209	0.458856	0.415503	0.366228	0.481251	0.386668	0.364977	0.278236	0.317156	0.328151	0.130102
GAAATGTA	0.337169	0.144635	0.31979	0.416256	0.331964	0.348622	0.439919	0.423949	0.275523	0.340984	0.350098	0.293156	0.346764	0.382776	0.362295	0.318938	0.333528	0.364996	0.340875	0.376087	0.335102	0.397707	0.362862	0.327326	0.364832	0.388037	0.391265	0.407973	0.3661	0.315595	0.381853	0.431347	0.343032	0.400075	0.397608	0.449803	0.452809	0.456783	0.413206	0.45163	0.371389	0.3724	0.434247	0.380408	0.243559	0.328319	0.31625	0.442029	0.40169
AAAATGTA	0.090563	0.219379	0.405632	0.414234	0.221201	0.197626	0.413909	0.425358	0.246297	0.341034	0.308517	0.294279	0.348347	0.403976	0.288166	0.192574	0.180691	0.244858	0.375985	0.270012	0.288033	0.400684	0.332216	0.215164	0.397791	0.305298	0.324296	0.360489	0.285898	0.111391	0.390975	0.396373	0.32163	0.35197	0.420371	0.427917	0.463287	0.443699	0.44521	0.436049	0.340077	0.342617	0.445246	0.160299	0.255039	0.127796	0.369843	0.303556	0.354871
ATACATTG	0.139132	0.189683	0.264556	0.284997	0.392322	0.401844	0.467543	0.454109	0.247588	0.385593	0.301762	0.314208	0.369119	0.427894	0.406876	0.297673	0.342814	0.353803	0.271932	0.353775	0.371906	0.381081	0.399883	0.404303	0.432099	0.382277	0.416129	0.422248	0.367256	0.355165	0.443596	0.449038	0.414816	0.389157	0.467068	0.474293	0.468814	0.472056	0.453926	0.468523	0.3896	0.416548	0.452345	0.378341	0.366292	0.246779	0.341487	0.326767	0.266007
AAATGTAT	0.216601	0.127501	0.422401	0.38941	0.379773	0.36299	0.468257	0.466873	0.31268	0.386714	0.392618	0.379996	0.408962	0.442504	0.394818	0.383194	0.327606	0.363441	0.393112	0.389769	0.426422	0.438503	0.414076	0.384146	0.443693	0.412855	0.427192	0.451707	0.384111	0.357921	0.443614	0.461788	0.424562	0.440911	0.451363	0.482043	0.487936	0.487952	0.476049	0.489314	0.410703	0.443776	0.462492	0.406565	0.300933	0.318957	0.356002	0.401652	0.37533
AATGTATA	0.220482	0.141155	0.344341	0.388747	0.371901	0.400814	0.465366	0.470582	0.306831	0.401388	0.346598	0.400151	0.371225	0.429628	0.400112	0.34739	0.315165	0.396735	0.347716	0.428533	0.381383	0.422323	0.419835	0.396169	0.43271	0.418203	0.399726	0.438626	0.34282	0.317738	0.402604	0.450532	0.426215	0.424987	0.437988	0.481203	0.481758	0.486689	0.477292	0.491653	0.389261	0.454871	0.46814	0.416504	0.336801	0.312827	0.295616	0.389737	0.367582
AATGTATG	0.252804	0.239641	0.342401	0.28672	0.420721	0.380841	0.473123	0.461175	0.35174	0.37218	0.412726	0.268823	0.401364	0.419032	0.42716	0.375845	0.350692	0.404516	0.350537	0.342377	0.242231	0.341014	0.386133	0.363527	0.40482	0.388131	0.378704	0.364285	0.207379	0.29766	0.358809	0.330839	0.324683	0.331223	0.443632	0.461563	0.476828	0.466193	0.461975	0.48003	0.385276	0.422311	0.468977	0.417967	0.317805	0.305388	0.325996	0.219263	0.322754
ATGTATAC	0.252194	0.110592	0.277649	0.295701	0.392933	0.422539	0.468144	0.459913	0.330783	0.421033	0.397264	0.19801	0.383134	0.417114	0.401952	0.43502	0.360603	0.393799	0.319785	0.392251	0.400031	0.372172	0.387138	0.428308	0.426796	0.411841	0.44145	0.386727	0.386175	0.342617	0.411785	0.391404	0.445721	0.413447	0.47304	0.47525	0.481945	0.466039	0.485208	0.480774	0.44535	0.436063	0.481086	0.450997	0.414724	0.412527	0.296582	0.306687	0.188252
ATATACAT	0.096707	-0.0973487	0.254085	0.237484	0.317964	0.411116	0.445858	0.437604	0.272598	0.342326	0.323957	0.287329	0.366948	0.33549	0.370237	0.397427	0.241493	0.317952	0.317777	0.379411	0.317652	0.354097	0.334885	0.378462	0.415379	0.323697	0.337649	0.346366	0.229357	0.281502	0.371917	0.409156	0.385534	0.372498	0.439628	0.455524	0.465353	0.453157	0.462394	0.454314	0.356767	0.28951	0.459981	0.381713	0.257169	0.221726	0.200197	0.217057	0.24513
ATATATAT	0.0381079	0.249189	0.385079	0.232877	0.303251	0.163246	0.300809	0.0295081	0.101509	0.187279	0.313033	0.106962	0.291862	0.0462446	0.216961	0.192904	-0.0035913	-0.0569999	0.406842	0.271835	0.381407	0.273376	0.454822	0.231557	0.399852	0.279002	0.422087	0.341058	0.419631	0.253191	0.43928	0.277326	0.396762	0.145616	0.325459	0.299597	0.475269	0.314178	0.429579	0.376394	0.394178	0.14482	0.37584	0.200721	0.292935	0.158538	0.195099	0.0539624	-0.0163438
TATATATA	-0.00506041	0.13356	0.356972	0.27333	0.287678	0.142293	0.26016	0.0440677	0.0804641	0.203346	0.305029	0.212729	0.284495	0.0491281	0.198468	0.132116	-0.251286	-0.155752	0.408997	0.148265	0.396239	0.263866	0.440802	0.220828	0.402932	0.215855	0.423941	0.265039	0.401675	0.216208	0.433786	0.290378	0.385144	0.263556	0.350831	0.2812	0.453838	0.243352	0.425342	0.297339	0.40835	0.0599931	0.375988	0.177877	0.263087	0.0384429	0.167882	-0.112726	0.0320585
ATATTGTA	0.122082	0.0719586	0.371901	0.316336	0.300846	0.269756	0.388346	0.180499	0.163421	0.376883	0.394321	0.223575	0.362578	0.194899	0.314054	0.231525	0.170444	0.112636	0.384672	0.136118	0.39546	0.331853	0.373396	0.307835	0.388401	0.26517	0.457987	0.386116	0.387002	0.215843	0.45936	0.406038	0.41698	0.312333	0.457066	0.406077	0.461429	0.39251	0.422627	0.340937	0.379327	0.23122	0.455252	0.300087	0.330616	0.110291	0.342867	0.268818	0.249612
TAAATGTA	0.170708	0.144659	0.416526	0.335637	0.358056	0.204341	0.448438	0.394798	0.18049	0.417214	0.381136	0.240137	0.387351	0.257594	0.360401	0.238653	0.140513	0.215889	0.441638	0.308723	0.404572	0.229385	0.424118	0.198222	0.430493	0.239789	0.431091	0.312697	0.397918	0.214458	0.445863	0.369012	0.43401	0.238264	0.46085	0.395788	0.480951	0.423885	0.46649	0.417816	0.403572	0.328046	0.473193	0.308188	0.301104	0.242759	0.359902	0.315355	0.134264
ATGTTATA	0.143267	0.143742	0.432769	0.34787	0.356293	0.318819	0.429878	0.28081	0.335188	0.363126	0.37792	0.302952	0.345071	0.156453	0.361805	0.303161	0.218987	0.199494	0.377613	0.282471	0.42497	0.335826	0.440135	0.30269	0.421041	0.267533	0.446998	0.384266	0.400127	0.0665914	0.440244	0.357337	0.404991	0.260695	0.416262	0.372862	0.459336	0.391834	0.431085	0.357411	0.382491	0.265785	0.455662	0.287945	0.350277	0.135456	0.421345	0.31427	0.212156
AAATGTAA	0.282504	0.254273	0.433711	0.426364	0.313429	0.262604	0.396126	0.394817	0.330109	0.346215	0.310918	0.268817	0.355428	0.330375	0.26898	0.263217	0.241327	0.273876	0.401568	0.363574	0.416014	0.395617	0.420314	0.258992	0.421096	0.335072	0.459467	0.388427	0.443124	0.194786	0.457944	0.444001	0.415467	0.354838	0.434664	0.438267	0.480922	0.446319	0.469678	0.444822	0.427594	0.372934	0.459085	0.256256	0.299403	0.253378	0.402427	0.408274	0.336666
TAACATTA	0.109239	0.312703	0.443184	0.42931	0.34393	0.269558	0.362819	0.298568	0.269834	0.36197	0.355668	0.265541	0.289058	0.293555	0.338695	0.29579	0.301849	0.223872	0.407899	0.235352	0.392822	0.366304	0.395428	0.308898	0.430575	0.293053	0.441299	0.388513	0.422581	0.270409	0.438402	0.359098	0.398717	0.348586	0.390268	0.392233	0.461922	0.375103	0.427924	0.332637	0.334963	0.276618	0.426065	0.307578	0.252221	0.145558	0.412106	0.229561	0.148492
AAAATACA	0.159483	0.250053	0.389379	0.264723	0.358553	0.114446	0.339288	0.254075	0.140358	0.338877	0.382373	0.17786	0.363374	0.220086	0.256759	0.100225	0.244938	0.148707	0.427183	0.319592	0.349027	0.24241	0.387996	0.148641	0.421148	0.244607	0.419088	0.273314	0.330372	0.0830281	0.407762	0.299137	0.377396	0.326262	0.425472	0.3855	0.422247	0.336126	0.449559	0.357714	0.388492	0.256665	0.450245	0.139938	0.289124	0.173899	0.392075	0.248154	0.318287
AGTATATA	0.205179	0.189715	0.289479	0.303209	0.211436	0.247135	0.337176	0.26571	0.264671	0.314618	0.299754	0.221951	0.310079	0.219259	0.299016	0.258122	0.172334	0.170267	0.414954	0.327902	0.34537	0.307268	0.343218	0.373086	0.401817	0.380992	0.378548	0.385455	0.344778	0.186457	0.407386	0.334986	0.39813	0.335675	0.433024	0.367343	0.426621	0.347125	0.450231	0.359749	0.358077	0.309549	0.429343	0.188789	0.281021	0.121512	0.304964	0.207749	0.282565
TAAATATA	0.0533441	0.276731	0.4376	0.375162	0.272883	0.182646	0.2847	0.102704	0.00273207	0.31298	0.189517	0.117532	0.252304	0.0606972	0.244697	0.0797464	0.202421	0.152565	0.419585	0.208417	0.402862	0.242515	0.383316	0.224394	0.452363	0.212082	0.354182	0.263601	0.300368	0.0746312	0.410004	0.284095	0.427741	0.246346	0.386391	0.293009	0.407457	0.269649	0.437959	0.266709	0.392901	0.138677	0.401492	0.0837288	0.297045	-0.116304	0.308029	0.140001	0.282396
TTATATAA	0.297397	0.0109377	0.425126	0.308285	0.205976	0.104255	0.238882	0.175247	0.283748	0.297092	0.326204	0.421102	0.177641	0.275914	0.197128	0.167579	-0.1767	0.21979	0.433848	0.333489	0.349139	0.36129	0.42276	0.208935	0.454476	0.327039	0.410366	0.345606	0.325194	-0.00515577	0.431119	0.398814	0.430998	0.359062	0.39271	0.359884	0.437797	0.38291	0.418891	0.418688	0.357691	0.379493	0.407704	-0.0603158	0.224076	-0.242022	0.21014	0.277913	0.353208
ATTTATTA	0.162743	0.256798	0.436984	0.389986	0.293624	0.143249	0.337793	0.125957	0.113673	0.296528	0.34121	0.0358692	0.273269	0.149377	0.340412	0.117447	0.138676	0.18736	0.456713	0.373107	0.377781	0.268441	0.404575	0.218539	0.435386	0.255872	0.399737	0.309824	0.34676	0.149666	0.425998	0.314476	0.418766	0.340689	0.361715	0.284603	0.432317	0.325171	0.406998	0.294982	0.400739	0.162395	0.421343	0.143252	0.236054	0.0545601	0.319496	0.11007	0.308326
ATTATTTA	0.128461	0.222325	0.452825	0.396855	0.332075	-0.0482069	0.279228	0.0873419	-0.0128676	0.312799	0.249539	0.105146	0.284676	0.0926994	0.290566	0.0152486	0.117744	2.85e-05	0.42698	0.234304	0.377432	0.293723	0.436897	0.103299	0.427029	0.225232	0.423429	0.277456	0.367338	0.0515047	0.41939	0.312825	0.421004	0.20062	0.38723	0.290609	0.445541	0.317186	0.429345	0.286635	0.327795	0.137444	0.42238	-0.0111771	0.238907	0.00982387	0.298088	0.0669292	0.33884
ATATATTA	0.278113	0.156739	0.45443	0.408363	0.275185	0.273894	0.309751	0.155977	0.0246673	0.302284	0.425968	0.16051	0.241028	0.194538	0.299351	0.303368	0.183997	0.0424626	0.431066	0.356851	0.412118	0.363837	0.412505	0.329353	0.436786	0.366309	0.44039	0.395302	0.385464	0.248131	0.454154	0.408735	0.443992	0.333056	0.441706	0.393815	0.469276	0.407599	0.45274	0.405424	0.423217	0.369022	0.461544	0.307087	0.27632	0.266706	0.288518	0.27785	0.324921
ATATAATA	0.151809	0.0766002	0.440737	0.347401	0.242352	0.28808	0.288387	0.195791	0.163231	0.293338	0.374372	0.166705	0.251754	0.182069	0.245947	0.246761	0.0288975	0.0941837	0.454859	0.243595	0.385288	0.296379	0.421387	0.362882	0.442227	0.371842	0.454596	0.315405	0.364887	0.285808	0.457702	0.335734	0.44108	0.2894	0.453852	0.334667	0.457359	0.363315	0.442735	0.377417	0.414842	0.259296	0.449999	0.275197	0.159202	0.189359	0.213003	0.107664	0.305241
ATAATATA	0.286352	0.246238	0.472173	0.408139	0.349645	0.277894	0.352199	0.100209	0.195577	0.377615	0.428626	0.199058	0.346108	0.223901	0.326272	0.313516	0.200752	0.166171	0.469072	0.296731	0.451508	0.319375	0.470298	0.301015	0.471981	0.338266	0.466034	0.371559	0.404622	0.192941	0.462845	0.367004	0.470104	0.325067	0.459478	0.355609	0.4845	0.386435	0.474969	0.391413	0.450076	0.333761	0.458926	0.274133	0.282396	0.165056	0.354659	0.289613	0.268119
ATTATATA	0.207371	0.213273	0.445733	0.298319	0.309416	0.175325	0.298672	0.148949	0.0164553	0.353015	0.394349	0.163926	0.27498	0.106802	0.258019	0.128498	0.0219816	0.139841	0.469804	0.198073	0.434582	0.237043	0.445782	0.220166	0.468218	0.21592	0.461219	0.350484	0.380666	0.117448	0.451976	0.349559	0.461245	0.307824	0.466494	0.301595	0.478984	0.345206	0.475048	0.343645	0.437169	0.211687	0.468215	0.093759	0.283933	-0.193554	0.330138	0.177872	0.253457
ATATTATA	0.140291	0.216087	0.450779	0.388475	0.283803	0.255667	0.306755	0.169781	0.268852	0.353591	0.40866	0.140408	0.343795	0.243374	0.320123	0.275468	0.0038324	0.0977723	0.459924	0.262823	0.429575	0.261007	0.43112	0.325271	0.470495	0.310378	0.465943	0.337907	0.378515	0.218637	0.444556	0.295818	0.447696	0.297149	0.453254	0.311773	0.467607	0.350368	0.448695	0.368908	0.415451	0.156889	0.449818	0.237828	0.222004	0.181697	0.321146	0.200596	0.297263
ATACAATG	0.137256	-0.0101563	0.161109	0.11368	0.208733	0.338666	0.318393	0.375848	0.24214	0.211452	0.27398	0.142904	0.269918	0.256458	0.196403	0.29411	0.0730947	0.144374	0.264308	0.25021	0.372459	0.255286	0.366222	0.300559	0.437404	0.281835	0.443909	0.384178	0.363192	0.165315	0.455396	0.387273	0.395547	0.352641	0.409068	0.449049	0.448888	0.415126	0.417036	0.417692	0.33406	0.269161	0.380375	0.306778	0.21198	0.213215	0.0697422	0.149551	0.183975
AATTATAT	0.102714	0.120473	0.436109	0.461437	0.262274	0.147549	0.186984	0.250046	0.285523	0.293247	0.326307	0.28594	0.286989	0.230472	0.241182	0.126433	-0.0200238	0.203498	0.402561	0.379211	0.393217	0.388248	0.416528	0.268896	0.464848	0.311146	0.418042	0.4242	0.390983	0.125737	0.443989	0.412122	0.417911	0.407447	0.406984	0.355373	0.452174	0.418627	0.436984	0.369086	0.362517	0.237737	0.433299	0.0804179	0.250178	-0.143771	0.284818	0.157057	0.430148
AACAATTA	0.123486	0.154605	0.436173	0.436077	0.307928	0.28004	0.426917	0.35953	0.396516	0.406481	0.425164	0.359203	0.420768	0.333796	0.388447	0.225247	0.144665	0.12461	0.358382	0.276746	0.381165	0.379095	0.39046	0.373988	0.440247	0.370166	0.465081	0.461896	0.403049	0.10983	0.448435	0.417689	0.42286	0.35733	0.408518	0.419771	0.43438	0.425605	0.384667	0.404063	0.380807	0.351357	0.415979	0.143652	0.282892	0.0918922	0.294485	0.296296	0.388122
AATTGTTA	0.142963	0.219583	0.47028	0.445184	0.2597	0.235896	0.305644	0.179315	0.400574	0.394269	0.340293	0.332506	0.264363	0.122513	0.281009	0.276755	0.140425	0.160234	0.396994	0.288381	0.417721	0.452947	0.410529	0.384808	0.450569	0.4262	0.476478	0.479428	0.472664	0.346961	0.469214	0.464266	0.445621	0.41296	0.427785	0.439452	0.448897	0.456337	0.402946	0.422308	0.397813	0.379128	0.429158	0.242636	0.213206	0.220155	0.399185	0.371179	0.439841
ATATGTTA	0.161152	0.215276	0.432678	0.437984	0.344333	0.361942	0.383196	0.322848	0.236543	0.377684	0.274733	0.268901	0.291145	0.291908	0.35448	0.326599	0.209617	0.201493	0.352588	0.310331	0.408678	0.396249	0.382453	0.380382	0.415417	0.346567	0.442664	0.440813	0.429301	0.32836	0.439111	0.432766	0.411189	0.375974	0.411246	0.406712	0.45182	0.407783	0.389216	0.377273	0.368441	0.33252	0.438733	0.324941	0.234746	0.182007	0.366271	0.241547	0.122934
ACTAATTA	0.236334	0.292202	0.383573	0.420726	0.220801	0.36932	0.238581	0.248287	0.280416	0.2179	0.191516	0.33092	0.176812	0.273193	0.203741	0.32394	0.127569	0.209257	0.350905	0.28954	0.296508	0.408154	0.377371	0.390353	0.354368	0.35805	0.35083	0.460106	0.285492	0.318585	0.358024	0.406595	0.3049	0.408714	0.261619	0.384814	0.358496	0.394426	0.322628	0.37626	0.32021	0.388893	0.309933	0.284641	0.255983	0.114613	0.163793	0.259173	0.378782
ACTGTAGC	0.00963127	0.0365239	0.0270451	-0.0124932	0.158261	0.233141	0.248585	0.206522	0.139993	0.147083	0.165983	0.149812	0.12889	0.196471	0.162707	0.24574	0.0759032	0.103536	0.0892336	0.0464169	0.282672	0.38268	0.244182	0.278437	0.313769	0.169215	0.409586	0.472234	0.357129	0.285038	0.30923	0.443406	0.195283	0.305509	0.220043	0.337732	0.192496	0.327527	0.129545	0.120472	0.105727	0.0698426	0.114037	0.259652	0.106786	0.152156	0.143263	0.25216	-0.0282362
ACAGTTAT	0.0735851	0.0538129	0.28617	0.21059	0.266706	0.333404	0.253746	0.286043	0.314878	0.284586	0.298247	0.31063	0.181377	0.254241	0.218605	0.333138	0.0819255	0.226694	0.225631	0.311477	0.223207	0.379822	0.259654	0.345605	0.263941	0.348392	0.388949	0.467505	0.292978	0.206675	0.246674	0.382494	0.269959	0.292387	0.3074	0.383633	0.240674	0.396534	0.265113	0.310278	0.186236	0.304564	0.339859	0.305936	0.218356	0.253287	0.201069	0.322177	0.221084
CTACTGTA	0.230742	-0.067933	-0.0555214	0.192051	0.14809	0.321598	0.237379	0.195817	0.170036	0.10944	0.258593	0.192164	0.161552	0.197158	0.173728	0.34492	0.0137884	0.149247	-0.0231968	0.190477	0.0221478	0.380988	0.121234	0.388332	0.113499	0.318586	0.299012	0.478698	0.0298883	0.37134	0.0247105	0.409433	0.0799137	0.3437	0.172114	0.385401	0.176806	0.389252	0.0966789	0.368914	0.0709878	0.328815	0.209102	0.347107	0.0564978	0.266242	-0.0554183	0.306556	0.17265
CTACAGTA	0.191535	-0.133068	-0.127737	0.203669	-0.0373498	0.324842	0.120785	0.234105	0.177397	-0.0427862	0.0487717	0.145479	-0.0207357	0.226605	-0.0689742	0.339998	-0.0995945	0.143993	-0.06701	0.259649	-0.00026442	0.309544	0.123544	0.353641	0.0611756	0.315813	0.213841	0.465487	0.0754507	0.332158	0.0404748	0.368485	0.0787166	0.284765	0.200972	0.35254	0.0600453	0.343557	0.0634855	0.310311	0.0983177	0.314565	0.136573	0.353749	0.00558888	0.345437	-0.075214	0.292364	0.0882543
ACAGTAAT	0.174244	0.0951654	0.258307	0.234751	0.219706	0.368433	0.170745	0.32244	0.200475	0.325441	0.25449	0.253484	0.179625	0.207032	0.165924	0.332436	0.0923991	0.225826	0.33535	0.310234	0.253613	0.359093	0.309905	0.39768	0.322271	0.351753	0.40977	0.450419	0.274339	0.310033	0.286837	0.354201	0.262174	0.312001	0.318972	0.377608	0.325177	0.363265	0.290102	0.354223	0.274677	0.387725	0.323278	0.385103	0.219478	0.355073	0.14452	0.31792	0.197786
ACAGTAGC	0.12905	-0.198716	-0.149485	0.102909	0.100367	0.257606	0.149018	0.225479	0.106513	0.0179697	0.213822	0.147828	0.128559	0.183829	0.0270629	0.279551	0.000981068	0.109453	0.0396743	0.137858	0.18134	0.38005	0.132843	0.28793	0.154663	0.270479	0.439428	0.478214	0.240903	0.301288	0.188857	0.37567	-0.0070268	0.251329	0.234064	0.338789	0.136441	0.368316	0.0961698	0.232386	0.105982	0.281087	0.146724	0.338175	0.102844	0.251186	0.0773357	0.424183	0.0501751
AACAGTTA	0.151225	0.0803503	0.315484	0.359746	0.269416	0.258467	0.359654	0.400309	0.386569	0.297559	0.279636	0.4234	0.338279	0.371106	0.299153	0.293961	0.245877	0.334075	0.168275	0.28832	0.293684	0.415243	0.309447	0.329542	0.347543	0.349435	0.453031	0.485326	0.299838	0.13292	0.345342	0.425386	0.33136	0.328342	0.321785	0.412265	0.320571	0.405214	0.277396	0.375515	0.199291	0.32951	0.330348	0.287864	0.187359	0.154361	0.122418	0.363466	0.23779
ACAGTTAC	0.0780808	0.153483	0.277207	0.311423	0.192629	0.293089	0.26542	0.30065	0.343519	0.249756	0.265102	0.337939	0.279172	0.186265	0.277793	0.299543	0.286395	0.189097	0.228691	0.197913	0.33603	0.389988	0.321468	0.339312	0.346237	0.292486	0.46074	0.48593	0.381433	0.228743	0.32274	0.439841	0.284733	0.314362	0.320056	0.379819	0.271145	0.364739	0.253563	0.32883	0.193015	0.197925	0.357253	0.3513	0.181741	0.170734	0.146961	0.336369	0.0502055
ACAATTAC	0.220502	-0.000289115	0.364103	0.375518	0.1636	0.33704	0.20838	0.27677	0.336874	0.247081	0.289496	0.277599	0.306305	0.256837	0.10358	0.32401	0.0813127	0.202671	0.301656	0.19991	0.247358	0.305245	0.253339	0.339761	0.284772	0.320405	0.442789	0.459443	0.287088	0.184181	0.341657	0.364134	0.22099	0.32462	0.298309	0.364026	0.340777	0.384119	0.307008	0.314144	0.268671	0.280071	0.375086	0.341113	0.172599	0.155561	0.187333	0.264125	0.320922
AATACTGT	-0.0145141	-0.0366467	0.038021	0.117326	0.126014	0.326318	0.226072	0.182312	0.247785	0.123866	0.238887	0.29	0.108054	0.0967333	0.144604	0.362645	-0.0949361	0.121271	0.240616	0.109986	0.0416312	0.215681	0.201094	0.369575	0.233767	0.297037	0.43049	0.459411	0.108319	0.21478	0.211586	0.348218	0.128523	0.244984	0.227514	0.35426	0.285184	0.337873	0.181356	0.301508	0.15058	0.207131	0.282988	0.334163	0.153708	0.172978	0.0271541	0.107635	0.147589
ACAATAAC	0.0960152	0.0751389	0.233496	0.337308	0.126461	0.165205	0.29036	0.23396	0.187036	0.259295	0.146433	0.1624	0.226012	0.219627	0.308558	0.143584	0.219331	0.157878	0.216681	0.191636	0.287546	0.322896	0.232291	0.216927	0.339135	0.221069	0.419289	0.45879	0.31353	0.213204	0.330515	0.350144	0.257087	0.278216	0.318953	0.34814	0.339519	0.320309	0.310556	0.26841	0.280072	0.226462	0.351193	0.168139	0.131586	0.0436292	0.227091	0.182037	0.252326
AACTGTAA	0.0909404	-0.0879239	0.196514	0.28683	0.151404	0.368176	0.233857	0.32915	0.266347	0.209329	0.199537	0.307839	0.208223	0.207422	0.216721	0.354347	-0.101773	0.101113	0.292679	0.19999	0.245531	0.337234	0.354882	0.373545	0.286086	0.319825	0.417814	0.453529	0.347893	0.264514	0.315929	0.3682	0.147618	0.253777	0.21377	0.387147	0.21734	0.39002	0.174255	0.363554	0.0866563	0.245763	0.252052	0.372472	-0.017858	0.213248	0.153505	0.258043	0.169451
TACTGTAA	0.156143	0.105621	0.123747	0.280025	0.278792	0.3397	0.295636	0.180372	0.166239	0.321478	0.355241	0.214129	0.320272	0.181422	0.200705	0.340938	0.116759	0.181925	0.350586	0.21847	0.240819	0.358807	0.23952	0.39337	0.331947	0.310781	0.44378	0.472754	0.307639	0.366038	0.259217	0.415094	0.266754	0.369749	0.362496	0.411777	0.327987	0.397707	0.324756	0.406201	0.279986	0.333726	0.351574	0.357688	0.268071	0.18681	0.218757	0.177244	0.204564
ACTGTATC	0.023839	0.231754	0.0491145	-0.19914	0.273347	0.08156	0.266005	0.172355	-0.196658	0.151651	0.169905	-0.12636	0.2511	-0.0373973	0.210403	0.104232	0.0536618	-0.0393469	0.303214	-0.129158	0.405497	0.288537	0.392932	0.159385	0.362086	0.0405226	0.486506	0.481475	0.470104	0.282169	0.446017	0.425041	0.430712	0.440721	0.419126	0.452748	0.431591	0.376157	0.33168	0.273159	0.190181	0.115219	0.344807	0.20544	0.246363	0.0373288	0.0931544	-0.0216982	-0.284771
ACTGTTAC	-0.0177204	-0.148545	0.226718	0.177428	0.129138	0.223235	0.229978	0.18054	0.194661	0.155799	0.156665	0.175299	0.218795	0.160226	0.178566	0.247158	0.0672744	0.114272	0.113499	0.0425621	0.387002	0.388448	0.320711	0.286825	0.364161	0.283999	0.485803	0.458533	0.461716	0.189305	0.436769	0.403013	0.305385	0.246119	0.367009	0.396158	0.336715	0.354647	0.160067	0.22968	0.183396	0.257916	0.243457	0.255936	0.218774	0.0989544	0.199295	0.160605	-0.018337
ACTGTAAC	-0.0275067	-0.00931964	0.171088	0.296069	0.160382	0.366832	0.195849	0.235499	0.257477	0.235217	0.0982654	0.188845	0.132368	0.128357	0.125594	0.346141	0.181813	-0.0375649	0.103975	0.180092	0.423726	0.458956	0.378195	0.412206	0.396184	0.355755	0.486936	0.492298	0.46187	0.422031	0.433006	0.461586	0.3426	0.410833	0.326633	0.462243	0.342811	0.424066	0.138107	0.366076	0.215145	0.29654	0.181228	0.358821	0.104806	0.14357	0.185651	0.26017	0.0877959
CAGTTACA	0.076456	0.0722546	0.226314	0.286986	0.181085	0.317416	0.277275	0.262423	0.308836	0.216575	0.235278	0.309703	0.18348	0.20945	0.215497	0.37409	0.153333	0.121954	0.233407	0.132215	0.37045	0.376519	0.311919	0.330322	0.308476	0.347668	0.415808	0.460313	0.420913	0.294959	0.417348	0.422235	0.33579	0.40432	0.340637	0.397325	0.313116	0.373355	0.255023	0.255448	0.257474	0.258458	0.332787	0.277018	0.20687	0.228727	0.337805	0.308892	0.0795625
ATACAGTA	0.156329	0.163201	0.120129	0.156793	0.293214	0.394878	0.354094	0.320556	0.0914016	0.296417	0.275912	0.124557	0.189126	0.238438	0.279289	0.39282	0.0991473	0.227241	0.267778	0.210818	0.23378	0.237301	0.301538	0.424851	0.318591	0.375127	0.461657	0.464672	0.301823	0.356489	0.271425	0.358596	0.381033	0.396916	0.397396	0.451356	0.40732	0.395532	0.34967	0.416384	0.263955	0.32643	0.383908	0.401497	0.288467	0.314346	0.160865	0.227101	-0.0383794
TAACAGTA	0.0279257	0.109526	0.214715	0.058506	0.255405	0.229726	0.311166	0.111203	0.0733232	0.2474	0.310748	0.00929349	0.222353	0.0910571	0.279003	0.254259	0.226269	0.069716	0.344258	0.0315548	0.324087	0.236838	0.365018	0.291894	0.324267	0.233874	0.468884	0.383258	0.344894	0.0326623	0.34832	0.205294	0.241759	0.212206	0.366567	0.30846	0.376353	0.274925	0.248042	0.271231	0.214689	0.195405	0.364824	0.228161	0.268123	0.191105	0.337709	0.173906	-0.0919125
AACAGTAA	0.143834	0.133214	0.279367	0.194651	0.249325	0.269698	0.371127	0.338086	0.184693	0.343046	0.321498	0.233179	0.355375	0.261103	0.288524	0.300448	0.251965	0.192247	0.260531	0.208416	0.344612	0.334727	0.328414	0.301824	0.353068	0.286809	0.469904	0.438272	0.385674	0.279945	0.351423	0.2931	0.22503	0.269625	0.363435	0.318529	0.350118	0.329477	0.32119	0.280472	0.324602	0.222295	0.330238	0.259608	0.327437	0.179081	0.247034	0.285645	0.135368
AACTGTAT	-0.00989102	0.0719322	0.146724	0.0205711	0.259862	0.13682	0.364262	0.318713	0.132129	0.314557	0.316044	0.142256	0.303478	0.233045	0.299367	0.248876	0.137334	0.0999022	0.247994	0.0855156	0.237741	0.178225	0.276579	0.180127	0.377602	0.169594	0.45866	0.424358	0.315029	-0.0388603	0.363375	0.222254	0.28671	0.253845	0.377248	0.366674	0.372648	0.273666	0.364797	0.278746	0.224497	0.156443	0.365727	0.152933	0.206772	0.00270579	0.15588	-0.0593804	0.00122258
ACAGTTGC	-0.175945	-0.150307	0.0963987	0.129167	0.125676	0.23896	0.431922	0.434285	0.31935	0.354474	0.209044	0.326319	0.387036	0.356774	0.284505	0.291756	0.126242	0.280577	-0.0524526	0.0525616	0.338734	0.29712	0.271875	0.194421	0.364603	0.239087	0.494798	0.483881	0.385579	0.0139253	0.408828	0.283138	0.192677	0.151885	0.267223	0.323718	0.284615	0.243606	0.0715049	0.163788	0.0650036	0.172393	0.090788	0.0661555	0.202046	0.216733	0.195143	0.171309	-0.0359591
AACTGTTA	-0.00530145	0.177566	0.329747	0.213347	0.328097	0.240828	0.344697	0.244028	0.242249	0.332269	0.36781	0.299883	0.308243	0.277281	0.298939	0.245354	0.0899075	0.14327	0.351734	0.184017	0.347043	0.320939	0.387438	0.258658	0.413524	0.255579	0.466641	0.456058	0.424661	0.171139	0.381903	0.379218	0.392319	0.196224	0.319226	0.373924	0.366901	0.350046	0.268687	0.222298	0.227703	0.289371	0.355848	0.278362	0.130067	0.0965277	0.264641	0.273418	0.0716322
ACAGTAAC	0.00443971	-0.116877	0.161325	0.228141	-0.050454	0.192519	0.273841	0.192723	0.191962	0.0894295	0.127847	0.021891	0.205824	0.143142	0.089136	0.207774	0.130593	0.126541	0.0754304	0.205358	0.268165	0.307052	0.274196	0.251801	0.365065	0.253784	0.483685	0.481108	0.395004	0.182728	0.325905	0.346839	0.136635	0.328916	0.284316	0.349657	0.23022	0.298821	0.256803	0.223939	0.159009	0.145905	0.251079	0.185352	0.158838	0.14724	0.0810396	0.164356	-0.0988315
ACAGTATC	-0.110018	-0.0939181	0.0369602	0.0436897	0.0806426	0.249074	0.239338	0.195613	0.0960313	0.183779	0.14205	0.0824089	0.0834492	0.0821359	0.157163	0.158245	0.0498938	0.0623751	0.0480101	0.173994	0.30559	0.253375	0.308911	0.28567	0.367351	0.133024	0.466203	0.472907	0.403239	0.211444	0.305802	0.282708	0.399187	0.328553	0.290745	0.2668	0.282792	0.215451	0.167441	0.131196	0.193963	0.135076	0.227734	0.155253	0.120261	0.145941	-0.00459419	0.00812342	-0.0839309
TACAGTAA	0.19236	0.0954124	0.243271	0.324248	0.305265	0.309756	0.242725	0.269208	0.193693	0.348314	0.236674	0.149984	0.214651	0.193776	0.174422	0.299423	0.0434999	0.153292	0.329865	0.289651	0.308266	0.310736	0.261131	0.350976	0.372695	0.358371	0.456223	0.454751	0.351789	0.157257	0.301143	0.369632	0.331165	0.302762	0.360247	0.410419	0.350757	0.365273	0.350504	0.400417	0.24989	0.347142	0.354322	0.305166	0.23997	0.335028	0.164492	0.27599	0.0494201
ATACTGTA	0.0158179	0.130739	0.0965407	0.00609255	0.251982	0.394475	0.366273	0.26124	0.204929	0.291051	0.273483	0.218757	0.240362	0.054001	0.249398	0.365396	0.108139	0.154586	0.233611	0.187995	0.216567	0.293861	0.295237	0.383188	0.301439	0.340999	0.471065	0.474596	0.278787	0.386131	0.319356	0.333755	0.300465	0.358771	0.400153	0.401106	0.396115	0.377319	0.320557	0.353367	0.319646	0.314903	0.412776	0.379153	0.312164	0.250913	0.186975	0.206742	0.00324592
AACAGTAT	-0.257025	0.0846959	0.158464	0.221869	0.271444	0.303385	0.404924	0.375267	0.335989	0.351984	0.367719	0.354698	0.289969	0.286624	0.332709	0.279981	0.188658	0.0258542	0.300687	0.0549382	0.2966	0.289266	0.362911	0.325878	0.338657	0.307809	0.453207	0.465455	0.266618	0.0831478	0.290492	0.343168	0.331145	0.257004	0.361778	0.343244	0.332664	0.31881	0.320452	0.260227	0.292029	0.209373	0.39511	0.257845	0.228888	0.188459	0.229027	0.0301533	0.0753816
ACATTGTA	-0.00938239	0.0693345	0.148907	0.19731	0.13693	0.359525	0.384169	0.420949	0.245478	0.264229	0.173029	0.281419	0.255831	0.35089	0.214974	0.310176	0.142942	0.267455	0.191906	0.236693	0.259323	0.292101	0.234839	0.303229	0.329553	0.28663	0.429649	0.428173	0.273614	0.067311	0.475919	0.485226	0.24762	0.312903	0.359817	0.438469	0.387981	0.434547	0.305157	0.407868	0.171213	0.353942	0.368807	0.270629	0.281059	0.101708	0.200373	0.234918	0.20537
AACAATGT	0.0431209	0.0481336	0.332411	0.369016	0.323855	0.361622	0.443157	0.442711	0.382876	0.387443	0.36365	0.333761	0.403585	0.411511	0.372541	0.354193	0.314237	0.35627	0.368079	0.314538	0.308786	0.426787	0.310188	0.344044	0.349585	0.370885	0.417386	0.465411	0.305377	0.234505	0.466193	0.489203	0.324952	0.335553	0.428755	0.450532	0.417196	0.434095	0.354379	0.399415	0.304856	0.31895	0.426395	0.33135	0.189933	0.200678	0.260614	0.265415	0.271252
AACATTGT	-0.111805	0.0593098	0.385041	0.314787	0.294403	0.211175	0.450142	0.436799	0.356529	0.422539	0.33681	0.385977	0.439754	0.413302	0.360093	0.247133	0.292726	0.304959	0.292528	0.271393	0.322127	0.362005	0.259424	0.167229	0.337669	0.224609	0.421457	0.447567	0.343751	0.0284375	0.481012	0.487663	0.28013	0.245493	0.392717	0.430385	0.414993	0.406477	0.328374	0.350313	0.239723	0.255486	0.372599	0.0363104	0.176406	0.0880067	0.348369	0.126028	0.212481
ACAATGTA	0.172847	0.116112	0.280083	0.329043	0.388837	0.405888	0.432863	0.450366	0.396142	0.413207	0.359502	0.383386	0.403776	0.407401	0.403449	0.398826	0.252931	0.344714	0.40573	0.312617	0.337973	0.387529	0.408608	0.369331	0.428347	0.365183	0.386717	0.464138	0.348928	0.144624	0.447423	0.486581	0.354161	0.386442	0.438081	0.466874	0.429488	0.458681	0.414518	0.443222	0.353228	0.363075	0.426556	0.400738	0.253261	0.248791	0.339843	0.329426	0.288199
ACTATGTA	-0.0563373	0.123186	0.279352	0.290459	0.305955	0.252709	0.369197	0.406408	0.337755	0.357566	0.353935	0.365403	0.231831	0.30372	0.263848	0.237843	0.217054	0.235343	0.318279	0.250219	0.328522	0.398833	0.334245	0.231213	0.380952	0.287174	0.367694	0.426999	0.281715	0.0513365	0.435752	0.476208	0.367926	0.336813	0.363651	0.452377	0.354835	0.42145	0.369647	0.377715	0.326001	0.235584	0.398177	0.156563	0.173813	-0.080633	0.2353	0.197256	0.189017
AACTTTGT	0.0918694	0.0509962	0.334877	0.36714	0.0957823	0.0357874	0.30726	0.347244	0.243249	0.18308	0.271159	0.269003	0.242362	0.238209	0.231653	0.205355	0.129776	0.123465	0.290359	0.114916	0.225409	0.203218	0.26487	0.119779	0.313763	0.132677	0.306332	0.354888	0.276381	0.0235207	0.415519	0.463108	0.275335	0.131129	0.326503	0.303171	0.326919	0.275357	0.272554	0.179052	0.194922	0.15164	0.334108	0.0507606	0.10664	0.0845007	0.291307	0.120895	0.23033
ACAAAGTA	-0.0656188	-0.0123909	0.260031	0.196079	0.095723	0.13662	0.302438	0.28578	0.0595678	0.220817	0.195675	0.256498	0.237173	0.155481	0.15973	0.0995114	0.198088	0.0203923	0.150868	0.0360236	0.297934	0.206922	0.226361	0.142998	0.303475	0.147162	0.299765	0.27966	0.337476	0.195744	0.452964	0.435977	0.300458	0.125684	0.224193	0.323165	0.276372	0.287057	0.206478	0.238788	0.120057	0.230551	0.260429	0.176547	0.116358	0.0578361	0.190872	0.0996382	0.163937
ACTTTGTA	-0.089769	0.153967	0.284737	0.320735	0.0980181	0.0288071	0.193709	0.302994	0.235568	0.111753	0.283922	0.351197	0.0724796	0.122077	0.140295	0.0294923	0.127467	0.0233429	0.228243	0.0648238	0.162051	0.291426	0.263389	0.0846122	0.237282	0.17331	0.259246	0.347185	0.275905	-0.133819	0.441247	0.451279	0.197828	0.257681	0.303538	0.333699	0.316997	0.28679	0.244654	0.245407	0.165281	0.100852	0.344511	-0.121968	0.142168	-0.170553	0.309601	0.236313	0.222254
AATGTAGC	0.169854	0.0328671	0.23849	0.184359	0.256232	0.225387	0.384458	0.38007	0.152986	0.31895	0.256721	0.192973	0.294727	0.29091	0.309208	0.218298	0.150051	0.228105	0.167103	0.277082	0.372909	0.471726	0.302618	0.282668	0.38334	0.333131	0.352294	0.463172	0.452933	0.266904	0.437005	0.477869	0.342862	0.407463	0.333259	0.451414	0.395184	0.465014	0.216791	0.370698	0.147122	0.318497	0.275684	0.172095	0.221325	0.352812	0.263697	0.331814	0.163739
TAGTAACA	-0.0668514	0.17658	0.25037	0.37275	0.175077	0.314115	0.201713	0.186772	0.246525	0.161058	0.150365	0.226644	0.175157	0.148165	0.173096	0.322564	0.00295063	0.172441	0.193269	0.205472	0.428284	0.444246	0.317556	0.392782	0.365543	0.36108	0.434433	0.474044	0.457686	0.371842	0.457195	0.48045	0.357401	0.380258	0.421721	0.471583	0.368246	0.450205	0.312404	0.292463	0.329306	0.362654	0.375165	0.362231	0.219553	0.224324	0.324079	0.287047	0.18504
GTAACAAA	0.356827	0.204857	0.339655	0.403575	0.292554	0.361525	0.242769	0.333548	0.344284	0.195524	0.269857	0.302046	0.273362	0.32651	0.206083	0.366026	0.116146	0.259323	0.201376	0.377835	0.459159	0.468327	0.397494	0.378825	0.417836	0.39435	0.450262	0.461427	0.485243	0.388681	0.474823	0.481577	0.466118	0.458781	0.434491	0.467349	0.455271	0.463921	0.340803	0.414587	0.359503	0.390881	0.325084	0.32151	0.273716	0.294346	0.454045	0.452813	0.277353
AATGTAAC	0.226242	0.10645	0.343322	0.415938	0.285636	0.364613	0.364151	0.416352	0.34283	0.228062	0.280384	0.285549	0.294494	0.380055	0.27638	0.361651	0.243943	0.320852	0.301678	0.374812	0.479715	0.483589	0.436493	0.381022	0.460271	0.410113	0.471704	0.477209	0.492067	0.36581	0.484634	0.481764	0.443901	0.470716	0.410581	0.475592	0.464827	0.472801	0.415565	0.451624	0.353548	0.387205	0.367629	0.29742	0.267837	0.201058	0.420433	0.451986	0.15645
ATTGTTAC	0.22965	-0.0374993	0.347686	0.442645	0.00904464	0.333809	0.202478	0.2944	0.341657	0.0829442	0.213341	0.314903	0.124912	0.230099	0.134629	0.328338	-0.0772214	0.220359	0.182399	0.355723	0.458915	0.49109	0.403427	0.411653	0.449367	0.445659	0.468152	0.484762	0.491004	0.401262	0.47946	0.488959	0.462347	0.47267	0.387327	0.482167	0.470901	0.481734	0.310068	0.449826	0.31605	0.404963	0.306764	0.331242	0.0698371	0.304557	0.413756	0.445513	0.310367
GTTACATA	0.211218	0.181294	0.342293	0.349552	0.260968	0.252011	0.322891	0.273101	0.185487	0.234525	0.108046	0.255488	0.279887	0.21458	0.309148	0.262087	0.14887	0.278128	0.193912	0.335279	0.436732	0.466617	0.360743	0.306887	0.418755	0.364393	0.409641	0.464543	0.476967	0.374074	0.462911	0.479762	0.408152	0.422556	0.421302	0.469543	0.421834	0.463025	0.363529	0.43496	0.405264	0.350724	0.390563	0.30882	0.319991	0.168087	0.376582	0.3972	0.143178
GGTTACAA	0.322719	0.114021	0.177341	0.272229	0.127251	0.255841	0.103269	0.221695	0.215109	0.0625726	0.19144	0.170047	0.17811	0.282032	0.0483013	0.285496	0.033026	0.103872	0.143128	0.243998	0.387363	0.454845	0.283476	0.291557	0.295677	0.329953	0.386435	0.434552	0.45788	0.290723	0.453744	0.463025	0.320285	0.418876	0.353844	0.439983	0.323064	0.425965	0.274529	0.375946	0.232526	0.303872	0.2234	0.183469	0.203404	0.202531	0.320623	0.402598	0.210134
GTAACATA	0.253699	0.0928301	0.355333	0.443277	0.174744	0.352999	0.271869	0.283303	0.22765	0.174142	0.205599	0.0133566	0.118259	0.269104	0.230987	0.401944	0.236136	0.26168	0.264958	0.321709	0.443943	0.470296	0.376473	0.385932	0.398202	0.370035	0.451744	0.457277	0.477949	0.358955	0.474189	0.476135	0.361099	0.398285	0.421262	0.465081	0.435963	0.440749	0.349353	0.414402	0.276011	0.324235	0.387379	0.397272	0.292089	0.347495	0.361871	0.370096	0.193274
AGTTACAT	0.187678	0.101328	0.295273	0.430334	0.263924	0.311486	0.355136	0.303419	0.393191	0.264616	0.265139	0.324065	0.21731	0.258046	0.263234	0.318746	0.107245	0.16868	0.331595	0.288092	0.464354	0.465499	0.384012	0.367483	0.425556	0.385074	0.444187	0.468807	0.481233	0.376879	0.458529	0.472441	0.425852	0.442098	0.428191	0.462754	0.41858	0.444109	0.377762	0.403217	0.377899	0.3237	0.3826	0.294282	0.268105	0.196015	0.38441	0.404712	0.190713
AGTAACAA	-0.00181814	-0.0923553	0.366936	0.350228	0.0862203	0.112349	0.170174	0.229539	0.261179	0.136599	0.189998	0.203574	0.158138	0.230999	0.0280273	0.255346	-0.143415	-0.0690949	0.166262	0.208389	0.44944	0.464176	0.423952	0.243877	0.423269	0.321735	0.459671	0.472561	0.485429	0.298734	0.475006	0.474214	0.44431	0.439617	0.367779	0.471472	0.439843	0.460567	0.277862	0.36386	0.253113	0.292311	0.262044	0.160553	0.0216713	0.165066	0.325101	0.343274	0.0162237
TAGTTACA	0.107097	0.0807897	0.322677	0.308362	0.0795098	0.298763	0.244258	0.226104	0.121437	0.217034	0.225652	0.214177	0.0544376	0.130868	0.144255	0.260951	0.116895	0.0797037	0.271787	0.258257	0.441759	0.458157	0.388106	0.344575	0.433195	0.298542	0.437466	0.449676	0.477694	0.319657	0.464848	0.472626	0.427549	0.39518	0.412615	0.459086	0.382382	0.429321	0.34184	0.340857	0.31689	0.274651	0.394615	0.264282	0.251689	0.063376	0.34841	0.268962	0.163843
CTGTAACA	0.136493	0.0362933	0.19776	0.268187	0.00639421	0.358065	0.155807	0.316367	0.297773	0.0104091	0.206201	0.261753	0.164501	0.254018	0.112397	0.322861	0.240571	0.174304	0.0373266	0.239365	0.41819	0.413678	0.306807	0.392159	0.356372	0.380266	0.402621	0.445925	0.465979	0.362339	0.435794	0.457914	0.361085	0.4409	0.337903	0.470654	0.373784	0.458253	0.2575	0.372324	0.265972	0.341752	0.254344	0.359215	0.0236339	0.238849	0.351229	0.326263	0.0675758
CTGTTACA	0.252201	-0.0641156	0.098512	0.110703	0.0436083	0.246295	0.125066	0.29705	0.178054	0.0205781	0.219195	0.116686	0.185207	0.295508	0.101992	0.29999	0.00988222	0.22641	0.0458357	0.223224	0.389995	0.43275	0.222217	0.303534	0.3634	0.33692	0.398285	0.449224	0.459395	0.316039	0.432468	0.436734	0.337995	0.400858	0.384155	0.460559	0.363556	0.43881	0.211489	0.3783	0.232203	0.365276	0.258466	0.323528	0.126476	0.22946	0.322021	0.408122	-0.0146675
CATGTAAC	0.171222	0.047663	0.18552	0.281285	0.206244	0.327795	0.248115	0.328939	0.263532	0.249271	0.22225	0.231486	0.260516	0.181993	0.164025	0.32036	0.179631	0.203647	0.197776	0.263907	0.355673	0.422369	0.309266	0.346356	0.329014	0.346742	0.395311	0.392079	0.463419	0.315579	0.413711	0.446429	0.36357	0.406961	0.403788	0.45565	0.392654	0.426108	0.323978	0.385596	0.21144	0.288725	0.323597	0.34742	0.212617	0.252317	0.304787	0.347702	0.058087
GTAACAAC	0.101361	-0.0412593	0.314868	0.197899	-0.0637122	0.260411	0.294837	0.268151	0.263325	0.247528	0.0774323	0.0877609	0.230039	0.243322	0.157671	0.298212	0.143886	0.0824748	0.0721616	0.221264	0.383814	0.390599	0.289113	0.328097	0.247694	0.311379	0.399693	0.419228	0.4606	0.217013	0.448876	0.454252	0.345555	0.41217	0.365474	0.454576	0.380403	0.425675	0.245509	0.350383	0.210098	0.325563	0.275387	0.28879	0.16678	0.253935	0.190836	0.247477	-0.0659653
ATGTAACG	-0.0361863	-0.0730835	0.177262	0.0721134	0.0924992	0.208364	0.249225	0.334923	0.191099	0.13487	0.215747	0.121453	0.236679	0.125769	0.151943	0.226819	0.087368	0.12052	0.158312	0.180755	0.40594	0.400598	0.282567	0.196391	0.365764	0.23198	0.415619	0.407428	0.479115	0.334447	0.460844	0.466167	0.378625	0.399579	0.401393	0.451825	0.393168	0.429924	0.342021	0.348228	0.316446	0.194469	0.364919	0.248608	0.220782	0.0648651	0.244437	0.216145	-0.00300988
GTGTAACA	0.281274	0.0418025	0.351857	0.20519	0.246493	0.287813	0.278417	0.27108	0.0903424	0.221459	0.316162	0.00273137	0.269885	0.227725	0.217052	0.280353	0.168973	0.262036	0.249506	0.29567	0.41845	0.434127	0.298552	0.311828	0.395453	0.308255	0.42973	0.398973	0.461437	0.346621	0.445575	0.416673	0.408685	0.415204	0.448328	0.470119	0.423393	0.436507	0.374432	0.400336	0.382637	0.416652	0.394822	0.381887	0.235765	0.370835	0.399641	0.401905	0.0467561
GTGTTACA	0.197609	0.0016068	0.321459	0.203864	0.197983	0.316649	0.265057	0.258853	0.114262	0.238241	0.352804	0.0621517	0.323047	0.242459	0.0816878	0.287746	0.108404	0.195084	0.170867	0.323048	0.369065	0.417981	0.385704	0.343232	0.345696	0.333202	0.415399	0.404138	0.453757	0.343463	0.430955	0.426287	0.296919	0.409471	0.390613	0.466407	0.413322	0.426767	0.336133	0.410762	0.306077	0.366826	0.309044	0.339997	0.133963	0.32191	0.400199	0.435947	0.109124
ATGTAGCA	0.264639	-0.110403	0.152569	0.235025	0.280448	0.307579	0.357994	0.404773	0.269564	0.343668	0.281643	0.232091	0.277642	0.286002	0.294718	0.318897	-0.0638661	0.273722	0.164972	0.313265	0.411672	0.448562	0.318288	0.343183	0.364803	0.340266	0.373848	0.441382	0.456963	0.400881	0.448069	0.470333	0.339356	0.38969	0.366003	0.466231	0.44455	0.475008	0.239238	0.411433	0.138534	0.347805	0.234369	0.358914	0.171082	0.367139	0.449303	0.473198	0.223685
TGTAGCAA	0.224152	0.040559	0.184863	0.232499	0.290211	0.303655	0.349914	0.372928	0.335823	0.332508	0.273783	0.302702	0.22071	0.311639	0.251488	0.351352	0.0775645	0.239673	0.27079	0.307889	0.461388	0.472506	0.425899	0.372908	0.446767	0.366648	0.461867	0.466605	0.487393	0.440001	0.484496	0.475551	0.427758	0.415786	0.442243	0.480468	0.485309	0.485104	0.335005	0.41249	0.290168	0.39891	0.267054	0.377506	0.326848	0.318608	0.486649	0.489784	0.213463
TGTAACAA	0.322685	0.176365	0.350474	0.353685	0.208855	0.31004	0.296648	0.331455	0.310309	0.155352	0.274723	0.200335	0.256822	0.278676	0.233581	0.314058	0.16689	0.291877	0.295618	0.384305	0.491602	0.483108	0.454253	0.410232	0.478957	0.446137	0.488724	0.480082	0.495955	0.426576	0.493029	0.487447	0.483853	0.482856	0.481822	0.493116	0.49228	0.490132	0.440007	0.46652	0.426008	0.399117	0.400418	0.367148	0.194584	0.335928	0.480916	0.467724	0.24024
TGTTACAA	0.320072	0.0515352	0.384567	0.334791	0.20245	0.293706	0.291263	0.349043	0.285228	0.200762	0.312307	0.170906	0.248202	0.332776	0.297603	0.317716	0.0541285	0.314159	0.264405	0.396788	0.483617	0.486985	0.455128	0.391118	0.462453	0.447359	0.484325	0.482924	0.491152	0.422245	0.488367	0.488917	0.457826	0.456906	0.448479	0.49159	0.476756	0.488836	0.398656	0.465232	0.39483	0.369661	0.345798	0.323199	0.156507	0.345054	0.489462	0.487389	0.277472
ATGTAACA	0.216926	0.111654	0.333842	0.396785	0.27276	0.403001	0.313456	0.371655	0.257418	0.25303	0.287204	0.30333	0.253217	0.334751	0.19675	0.407809	0.171026	0.286043	0.282363	0.378703	0.440361	0.484713	0.420056	0.428077	0.442514	0.433879	0.462776	0.478739	0.486311	0.423564	0.47569	0.485481	0.427386	0.474222	0.454279	0.48981	0.477416	0.490021	0.401016	0.480704	0.345168	0.417938	0.401213	0.421762	0.3092	0.360269	0.45687	0.478765	0.143655
ATGTTACA	0.207385	0.124333	0.393513	0.418103	0.31062	0.436813	0.348122	0.372037	0.323526	0.292948	0.294224	0.325809	0.240938	0.323086	0.335871	0.426011	0.310826	0.326299	0.327809	0.352042	0.472321	0.485098	0.41382	0.459657	0.446075	0.457216	0.469291	0.480192	0.484028	0.463743	0.475634	0.486637	0.448141	0.462569	0.435476	0.490087	0.460318	0.488446	0.410401	0.473235	0.399911	0.441983	0.409459	0.455945	0.339246	0.411661	0.462704	0.48319	0.208601
ATTGTAAC	0.310509	0.0450583	0.352221	0.30295	0.120684	0.323566	0.228196	0.267009	0.283724	0.134974	0.207008	0.23955	0.102489	0.2848	0.161368	0.266817	0.0691834	0.169537	0.139592	0.346187	0.460748	0.491002	0.394436	0.424016	0.435822	0.428799	0.470232	0.491994	0.486451	0.448308	0.487803	0.492018	0.422511	0.469198	0.435151	0.485994	0.440152	0.486762	0.364075	0.426174	0.350504	0.371104	0.346071	0.321303	0.137215	0.338993	0.465342	0.474745	0.207618
CTTGTAAC	0.271745	0.0713227	0.247836	0.28821	0.115566	0.208304	0.0674053	0.183067	0.164331	0.0773517	0.00663401	0.113154	0.139586	0.221673	0.00401005	0.28557	-0.0541639	0.229705	0.138055	0.331852	0.377084	0.448284	0.319619	0.306965	0.322568	0.381252	0.428205	0.435896	0.46566	0.336088	0.44569	0.452138	0.322502	0.415717	0.371916	0.448658	0.318401	0.442871	0.271446	0.392189	0.194742	0.391705	0.240183	0.255997	0.175717	0.281181	0.427958	0.430816	0.257118
AATGTATC	0.267929	0.111067	0.335457	0.368712	0.404021	0.392101	0.461528	0.453182	0.182393	0.362102	0.341865	0.310467	0.331593	0.381303	0.38011	0.368163	0.217248	0.326242	0.299521	0.461002	0.478822	0.491969	0.460521	0.446739	0.483128	0.461542	0.47576	0.493675	0.48857	0.483398	0.487895	0.497491	0.491594	0.495967	0.477069	0.49719	0.486937	0.49768	0.458937	0.495502	0.403017	0.475826	0.425838	0.38367	0.319154	0.411923	0.256704	0.407668	0.289235
ATGTATCA	0.276174	0.126119	0.312933	0.330097	0.345839	0.456579	0.417723	0.439532	0.218311	0.389893	0.303456	0.191341	0.244385	0.384088	0.338034	0.448839	0.25882	0.363807	0.322137	0.455209	0.481769	0.486764	0.467924	0.467783	0.47218	0.471476	0.481868	0.489336	0.49019	0.483102	0.485417	0.49312	0.490176	0.495023	0.492026	0.497027	0.492712	0.497292	0.469507	0.492353	0.446945	0.478767	0.445499	0.43523	0.348657	0.415519	0.337247	0.419837	0.317997
ATGTATCG	-0.106349	0.0107275	0.14052	0.0242703	0.220772	0.309137	0.38263	0.402513	0.103962	0.287594	0.31804	0.040613	0.239737	0.317462	0.277184	0.248359	0.170766	0.1295	0.148801	0.225364	0.383693	0.452528	0.341934	0.336439	0.371095	0.326153	0.435011	0.452765	0.477271	0.41006	0.463598	0.477808	0.45046	0.475278	0.455805	0.486777	0.441277	0.47513	0.365466	0.426603	0.32031	0.336366	0.373165	0.279362	0.233244	0.245933	-0.00680385	0.0935461	-0.0676148
GATACATC	0.0620913	0.211493	0.127259	0.104893	0.127308	0.35238	0.356597	0.377962	0.158656	0.30513	0.206061	-0.0165026	0.289795	0.287073	0.256542	0.347487	0.197528	0.211475	0.105806	0.249565	0.408401	0.405808	0.320457	0.37007	0.372824	0.305374	0.420437	0.415449	0.478199	0.400551	0.46366	0.459729	0.471196	0.471395	0.435202	0.479919	0.445479	0.452556	0.35343	0.386975	0.206459	0.381521	0.318204	0.332929	0.174954	0.282615	0.176527	0.13543	-0.0133946
TGGATACA	0.127599	0.164774	0.00201213	0.0599542	0.150848	0.130904	0.2275	0.176591	0.156666	0.0962547	0.0838885	0.0927418	0.049761	0.0894265	0.166419	0.16462	-0.0662645	0.0934089	0.178913	0.153284	0.418917	0.439844	0.348029	0.265118	0.376768	0.326564	0.431783	0.45537	0.481788	0.425441	0.478374	0.478231	0.461518	0.487241	0.432364	0.485992	0.446709	0.45502	0.285655	0.357869	0.187882	0.289197	0.189841	0.172979	0.0232548	0.190252	-0.126281	0.110228	0.0831785
CATGTATC	-0.0623659	0.173505	0.167509	0.169161	0.21108	0.289657	0.388411	0.358923	0.112207	0.297194	0.245634	0.087282	0.177161	0.225361	0.28437	0.254146	0.277605	0.217847	0.112286	0.157821	0.447771	0.446538	0.395022	0.336599	0.407929	0.304655	0.456064	0.468739	0.478773	0.435677	0.46475	0.479764	0.476877	0.488272	0.459486	0.492228	0.45948	0.474716	0.385848	0.394402	0.39977	0.333423	0.384118	0.294375	0.288192	0.192453	0.243699	0.186007	-0.10846
ATGTATCC	0.166352	0.193327	0.266051	0.20626	0.215224	0.309548	0.417153	0.348791	0.221762	0.294317	0.216061	0.166501	0.28818	0.27563	0.314601	0.328412	0.256912	0.242681	0.196035	0.268085	0.448356	0.415323	0.354625	0.344474	0.430682	0.353688	0.440866	0.453419	0.478903	0.414184	0.476232	0.475833	0.475393	0.477196	0.445791	0.483978	0.451846	0.462354	0.39546	0.421428	0.343616	0.352914	0.363568	0.316811	0.131264	0.26822	0.129572	0.215909	0.0304175
AGATACAT	0.14211	0.249312	0.280948	0.249889	0.295945	0.323601	0.417125	0.412618	0.24066	0.320258	0.311207	0.323756	0.337373	0.338713	0.330499	0.284865	0.277583	0.279879	0.303277	0.275231	0.461151	0.471919	0.448442	0.359939	0.45238	0.388989	0.455428	0.480015	0.479582	0.399734	0.470061	0.488759	0.489782	0.493805	0.461993	0.491819	0.469388	0.48513	0.427772	0.464412	0.382431	0.395354	0.423701	0.286603	0.309423	0.194106	0.317902	0.271844	0.0403736
GATACATA	0.223948	0.108295	0.294518	0.215018	0.283589	0.372605	0.382034	0.412315	0.304075	0.294115	0.316755	0.258461	0.263221	0.357932	0.320795	0.386065	0.244384	0.327246	0.38696	0.31083	0.457227	0.429356	0.394592	0.385606	0.439798	0.400647	0.441028	0.452953	0.480318	0.394134	0.473778	0.478146	0.479383	0.485261	0.48315	0.485495	0.473605	0.470472	0.433651	0.445808	0.435059	0.405283	0.445721	0.34522	0.308075	0.315342	0.25445	0.304217	0.12826
TGTATCAA	0.276368	0.111215	0.321104	0.26455	0.297284	0.326883	0.371543	0.346318	0.295786	0.349794	0.265571	0.258951	0.300522	0.344322	0.290267	0.304337	0.132512	0.263987	0.374886	0.382479	0.49239	0.484406	0.475934	0.410313	0.482796	0.439674	0.492792	0.487021	0.497246	0.463952	0.495669	0.492128	0.496944	0.494613	0.497518	0.49548	0.498262	0.49582	0.481543	0.479941	0.456102	0.437371	0.427319	0.33011	0.334612	0.281192	0.412845	0.371812	0.269427
ATGATACA	0.0854891	0.0930135	0.252162	0.159075	0.260484	0.335414	0.346074	0.358742	0.0776451	0.284522	0.284641	0.0288925	0.174249	0.341414	0.300384	0.300641	0.105532	0.238544	0.336169	0.354141	0.45639	0.435379	0.395475	0.352177	0.428967	0.350509	0.475451	0.444774	0.481794	0.270649	0.472586	0.445072	0.487635	0.48156	0.43538	0.469556	0.474454	0.459626	0.443742	0.429111	0.362383	0.392493	0.383803	0.312413	0.29115	0.308456	0.262777	0.305977	0.0875655
TGATACAA	0.154153	-0.00902472	0.249937	0.186224	0.219774	0.254679	0.332306	0.338919	0.243302	0.246375	0.278162	0.167375	0.221442	0.286791	0.309077	0.253501	0.196143	0.263368	0.333786	0.317802	0.48447	0.438644	0.428714	0.285691	0.465575	0.335704	0.480567	0.450588	0.490705	0.248054	0.486457	0.459568	0.493529	0.48515	0.465653	0.46746	0.484856	0.461616	0.447769	0.415504	0.385784	0.312545	0.403285	0.241959	0.194423	0.14414	0.275493	0.226149	0.0639068
TCGATACA	-0.183565	0.0334055	0.0658129	-0.177469	0.211237	0.112268	0.218641	0.254382	0.119735	0.230517	0.255225	0.118809	0.25425	0.0695737	0.169827	-0.00248045	0.0480031	-0.0575962	0.258909	0.200337	0.449456	0.419457	0.408717	0.167417	0.439442	0.267128	0.472133	0.45359	0.488857	0.291806	0.486033	0.482691	0.471787	0.463917	0.470508	0.473061	0.468079	0.458587	0.402247	0.356032	0.329094	0.276355	0.329698	0.0679812	0.178991	0.121834	0.0675258	0.100678	-0.0587323
ATTGTATC	0.0525164	0.0434022	0.213004	0.15868	0.200048	0.127655	0.261452	0.233387	0.236747	0.160674	0.16428	0.159672	0.251132	0.108937	0.190457	0.124613	0.0496307	0.0306117	0.349805	0.192789	0.48275	0.466464	0.4594	0.217285	0.467373	0.312804	0.487448	0.483784	0.489676	0.338392	0.488677	0.485303	0.491211	0.491375	0.470072	0.484415	0.485681	0.478783	0.454513	0.43001	0.338615	0.281143	0.367529	0.153502	0.256265	0.0505763	0.196014	0.0647584	-0.00350722
ATTGATAC	0.176357	0.180517	0.217169	0.20749	0.171681	0.350254	0.148347	0.160203	0.142206	0.22619	0.165635	0.0510405	0.100642	0.0369824	0.112024	0.282317	0.140211	0.07451	0.298911	0.267716	0.468278	0.449673	0.421387	0.380785	0.445023	0.387027	0.461548	0.466652	0.490134	0.43634	0.479863	0.481025	0.48601	0.488774	0.4647	0.472938	0.464442	0.477034	0.423127	0.408992	0.385107	0.386785	0.356854	0.313176	0.31601	0.189943	0.34529	0.239428	0.178947
TAGATACA	-0.0812778	0.173375	0.234049	0.129814	0.221064	0.187589	0.39759	0.273971	0.223165	0.298973	0.293274	0.272055	0.301185	0.146057	0.304832	0.18795	0.31791	0.0981548	0.29357	0.154781	0.474951	0.444609	0.411534	0.263996	0.454275	0.280922	0.464848	0.468588	0.485089	0.302019	0.480416	0.483688	0.490226	0.492409	0.470842	0.481489	0.471171	0.467043	0.423078	0.406034	0.385116	0.223594	0.421305	0.108642	0.360517	-0.170997	0.247996	0.000548167	0.0459267
CAGATACA	-0.0209637	0.182298	0.101956	0.059014	0.165034	0.229939	0.312457	0.313321	0.141834	0.171455	0.165879	0.2527	0.182729	0.256773	0.213605	0.200532	0.110826	0.210295	0.120678	0.177934	0.327927	0.324294	0.318226	0.239971	0.305477	0.222645	0.309076	0.363232	0.415196	0.338859	0.365672	0.401917	0.439897	0.434267	0.292649	0.451379	0.310605	0.388268	0.257736	0.312267	0.184639	0.204923	0.278703	0.274767	0.111613	0.172477	0.0278629	0.0614286	0.00751734
AAGATACA	0.0898681	0.0746044	0.280146	0.142957	0.214682	0.137996	0.270558	0.260805	-0.00372685	0.166037	0.289145	0.155929	0.230129	0.154491	0.203337	0.0970185	0.104289	0.093777	0.241551	0.118155	0.407653	0.392954	0.363548	0.238027	0.374612	0.24638	0.430327	0.435547	0.462756	0.306812	0.439849	0.44564	0.471261	0.482589	0.417874	0.452826	0.429592	0.399828	0.366195	0.345832	0.282447	0.296409	0.349363	0.13996	0.266397	0.11366	0.284172	0.168525	0.00586951
AGATACAC	-0.0414852	0.166882	0.200807	0.0366156	0.159094	0.133093	0.26385	0.237542	-0.0524947	0.188606	0.278738	0.00520148	0.183871	0.172614	0.271021	0.168257	0.158375	0.176378	0.156403	0.0661991	0.339734	0.354037	0.302817	0.207146	0.341094	0.188643	0.370615	0.367738	0.436837	0.194971	0.384849	0.411023	0.460512	0.475187	0.390813	0.446513	0.341207	0.340866	0.314993	0.326774	0.28238	0.0422364	0.350351	0.158942	0.309485	-0.0116076	0.164803	0.0409149	0.00602713
GTGATACA	0.279121	-0.0865938	0.112546	0.164361	0.0684904	0.317796	0.197927	0.18615	0.157983	0.0703601	0.133263	0.0246321	-0.0311842	0.159191	0.178324	0.323344	0.0823282	0.175015	0.0893975	0.261558	0.364452	0.337933	0.311236	0.365008	0.291231	0.281396	0.398575	0.385585	0.418466	0.296476	0.357318	0.407257	0.437161	0.455945	0.40678	0.448262	0.35597	0.405876	0.301514	0.333202	0.279545	0.316387	0.344272	0.332549	0.126999	0.298647	0.114593	0.197154	0.00613149
AGTATCAT	0.205903	0.0648189	0.208254	0.199128	0.0937836	0.288986	0.218828	0.15745	-0.0359415	0.0698369	0.0874361	-0.014888	0.0898291	0.0376422	0.169668	0.301669	0.132917	0.11623	0.237545	0.230006	0.379874	0.428518	0.303331	0.349139	0.348623	0.289816	0.355834	0.399634	0.405028	0.276939	0.389172	0.417935	0.421184	0.464167	0.324922	0.38623	0.325822	0.382858	0.253537	0.275637	0.190336	0.262335	0.22675	0.275438	0.100595	0.214327	0.0960751	0.200258	0.105784
AAGTATCA	0.183217	0.236073	0.30173	0.347005	0.128711	0.152378	0.29615	0.245968	0.0540302	0.218289	0.168104	0.0988321	0.145919	0.233139	0.178328	0.223755	0.0857515	0.175636	0.286257	0.253856	0.383158	0.448603	0.320966	0.301409	0.384395	0.298879	0.342199	0.430918	0.44279	0.356094	0.431831	0.453762	0.443184	0.472088	0.394589	0.438188	0.373932	0.442366	0.369288	0.340389	0.353797	0.226	0.330327	0.220424	0.225979	0.150095	0.182567	0.205399	0.128192
AGATACAA	-0.0671584	0.238112	0.268694	0.193634	0.174441	0.0969169	0.264677	0.219035	0.0837274	0.184916	0.0864673	0.0789308	0.190287	0.138179	0.199099	0.121319	0.253042	0.10442	0.219961	0.15147	0.390884	0.428748	0.333215	0.189627	0.375892	0.223221	0.37014	0.42658	0.432647	0.293225	0.447362	0.453216	0.450139	0.481816	0.391191	0.446381	0.407418	0.411325	0.333696	0.305178	0.329445	0.218508	0.33397	0.0850076	0.207038	0.0590491	0.198528	-0.020339	0.063192
AGTGTATC	0.0740298	-0.0250827	0.181316	0.107778	0.162235	0.174651	0.263968	0.26663	0.151408	0.209357	0.223441	0.0693058	0.203296	0.201163	0.148243	0.233997	-0.0245043	0.152815	0.269122	0.214526	0.373311	0.418392	0.297895	0.21118	0.350592	0.263539	0.430609	0.453157	0.455684	0.313998	0.438187	0.466912	0.440052	0.468964	0.418432	0.461659	0.358672	0.418189	0.336227	0.369142	0.296043	0.309017	0.346556	0.176445	0.200734	0.112952	0.177694	0.148741	-0.00780057
ATAGTATC	-0.0720927	-0.00769426	0.0780313	0.150254	0.0723534	0.300131	0.228925	0.253539	0.169792	0.149843	0.160629	0.177708	0.140707	0.128937	0.114749	0.206089	0.112218	0.0414106	0.118191	0.0467837	0.382017	0.410613	0.328352	0.31883	0.368106	0.292745	0.430407	0.44776	0.455649	0.256784	0.443391	0.473946	0.441236	0.473855	0.344939	0.452503	0.390843	0.436021	0.184151	0.350142	0.0937644	0.295669	0.229769	0.280232	0.184914	0.113638	-0.0491531	0.155114	0.0134515
AAAGTATC	0.227626	0.0136007	0.361141	0.398744	0.163667	0.321837	0.358032	0.403456	0.254867	0.238161	0.165327	0.292247	0.330526	0.334205	0.223292	0.32622	0.17396	0.339217	0.288928	0.374884	0.446475	0.474269	0.385689	0.4158	0.43676	0.41352	0.453309	0.481849	0.481835	0.43058	0.47006	0.484187	0.487914	0.495667	0.343803	0.473945	0.430037	0.485948	0.354434	0.438436	0.262067	0.409095	0.25904	0.317522	0.143074	0.288951	0.134536	0.306677	0.26331
AATTGATA	0.234167	0.245262	0.267193	0.251797	0.114124	0.298534	0.086922	0.111883	0.288513	0.168891	0.070889	0.22213	0.0225953	0.11637	0.0770241	0.313516	-0.0830981	0.151071	0.328672	0.295468	0.383549	0.417067	0.332214	0.363117	0.378143	0.363199	0.424158	0.432627	0.450721	0.306936	0.425071	0.432809	0.433378	0.462417	0.294816	0.393921	0.363074	0.425168	0.292332	0.365689	0.289528	0.360133	0.188167	0.282593	0.227006	0.16304	0.26142	0.255323	0.291323
AATGTTAC	0.15357	0.155901	0.450056	0.462903	0.257852	0.280755	0.298939	0.339265	0.185986	0.293747	0.324849	0.280419	0.212844	0.216246	0.304101	0.267421	0.113517	0.146945	0.308694	0.274834	0.465768	0.468202	0.434502	0.336345	0.452286	0.340368	0.463073	0.458421	0.484138	0.327881	0.482305	0.471852	0.41431	0.408136	0.441479	0.467983	0.456835	0.462891	0.390073	0.398031	0.317776	0.310842	0.420457	0.294504	0.245735	0.328269	0.452104	0.420238	0.250055
AAGTTACA	0.08345	0.0304137	0.434927	0.447908	0.119959	0.144995	0.21335	0.134228	0.113562	0.187477	0.159811	0.181992	0.170651	0.108882	0.257915	0.0545733	-0.0192307	0.119524	0.195276	0.155301	0.45222	0.43027	0.388798	0.154913	0.437194	0.225815	0.440666	0.428942	0.477516	0.278811	0.460814	0.464401	0.411303	0.327351	0.305163	0.41397	0.321094	0.376441	0.246704	0.296819	0.138321	0.174261	0.223682	0.15225	-0.0126567	0.115165	0.416266	0.423567	0.107257
AGTAACAT	0.203396	0.184441	0.376438	0.424332	0.185534	0.276857	0.316936	0.285171	0.188995	0.266329	0.173242	0.153463	0.180923	0.142732	0.267907	0.293199	0.213472	0.220117	0.199543	0.275123	0.450371	0.460801	0.371743	0.345224	0.433086	0.356231	0.423412	0.447446	0.468259	0.36012	0.449181	0.459794	0.360234	0.387051	0.402004	0.424151	0.365845	0.407386	0.304093	0.2867	0.289438	0.208684	0.387646	0.362076	0.256542	0.360774	0.395354	0.372953	0.200023
AGTTACAA	0.239796	-0.016941	0.357382	0.31568	0.096647	0.186523	0.248472	0.235757	0.142564	0.211711	0.0932649	0.310769	0.193301	0.203133	0.251439	0.199928	0.13607	0.138066	0.181621	0.287553	0.441176	0.445852	0.388847	0.240953	0.435665	0.29948	0.430222	0.441152	0.470665	0.252989	0.459316	0.455962	0.413627	0.368757	0.352768	0.409777	0.312854	0.399656	0.271304	0.286208	0.220018	0.287075	0.30034	0.198872	0.110077	0.150636	0.419515	0.412946	0.109377
ATTTGTTA	0.2197	0.296353	0.428549	0.392436	0.244659	0.268317	0.28807	0.256015	0.184744	0.307206	0.216665	0.135482	0.163917	0.224457	0.318645	0.162828	0.195193	0.269372	0.266995	0.346127	0.443555	0.424897	0.41466	0.273805	0.452816	0.330978	0.411657	0.37348	0.464404	0.293719	0.443225	0.42144	0.428825	0.404041	0.376199	0.376678	0.426335	0.417364	0.357987	0.411625	0.344049	0.347793	0.358623	0.219824	0.276566	0.223348	0.42732	0.363355	0.372723
TGCTACAA	0.0870485	0.0727602	0.18305	0.156314	0.187182	0.232158	0.211659	0.220952	0.256689	0.230283	0.096891	0.0914863	0.0949937	0.233439	0.154509	0.218654	0.189634	0.0223112	0.17144	0.0770998	0.443771	0.401996	0.381673	0.196237	0.42476	0.25209	0.414826	0.317131	0.467937	0.367755	0.453243	0.416635	0.390369	0.289866	0.320043	0.368248	0.437251	0.395354	0.306816	0.306328	0.220428	0.214231	0.21731	0.211262	0.19544	0.186617	0.411412	0.384566	0.0398028
GTAACTAA	0.192253	0.0956655	0.345899	0.320214	0.0894729	0.0798388	0.218469	0.12385	0.145777	0.1081	0.20112	0.275186	0.0907571	0.150675	0.120635	0.0972915	0.133755	0.111726	0.239915	0.119672	0.422818	0.387116	0.408942	0.160516	0.380378	0.203298	0.425846	0.392066	0.463249	0.237683	0.446814	0.421801	0.398093	0.392243	0.331025	0.359217	0.344852	0.301496	0.254612	0.188487	0.30205	0.238463	0.335779	0.0862335	0.140827	-0.00772735	0.211043	0.127352	0.0632078
AAAGTAAC	0.0104283	0.155441	0.414971	0.365378	0.107788	-0.0151588	0.270394	0.197031	-0.00199775	0.153309	0.227177	0.129456	0.186889	0.0994774	0.143126	-0.021282	0.231746	-0.00812171	0.261074	0.0524448	0.466641	0.417397	0.461716	0.030457	0.443646	0.211986	0.461524	0.435925	0.490176	0.143399	0.474477	0.444544	0.437109	0.398134	0.292396	0.359588	0.432489	0.368888	0.341239	0.210853	0.201416	0.251281	0.286602	0.0713203	0.0336278	0.0367926	0.41274	0.321934	0.120918
AAGTAACA	-0.0136077	0.17899	0.384073	0.303671	0.253284	0.0301285	0.330691	0.14732	0.136066	0.281606	0.24643	0.206182	0.258046	0.0791099	0.272709	0.0109012	0.246233	-0.102503	0.268121	0.00580937	0.474645	0.44159	0.468737	0.0929666	0.463262	0.155446	0.457436	0.435636	0.483578	0.304241	0.465243	0.458999	0.450394	0.380873	0.400621	0.408881	0.439867	0.394105	0.3866	0.239501	0.361103	0.108518	0.40564	0.169698	0.249355	-0.0251782	0.427909	0.369139	0.0677248
AGTGTAAC	0.200792	0.00683102	0.284847	0.31166	0.00933127	0.330461	0.241543	0.221749	0.0783938	0.204662	0.253301	0.0851553	0.208567	0.21873	0.116508	0.341472	0.000544779	0.248297	0.264215	0.331688	0.410159	0.397087	0.304117	0.370352	0.377695	0.345824	0.464639	0.380487	0.472818	0.331032	0.458686	0.394484	0.373508	0.38704	0.415572	0.432682	0.426416	0.386421	0.313488	0.368339	0.198168	0.333599	0.34431	0.379392	0.175441	0.365527	0.298103	0.364462	0.123348
ATGTTACC	0.172885	0.0536464	0.372824	0.413368	0.184624	0.209401	0.164131	0.23471	0.0668837	0.178094	0.102403	-0.0903114	0.13058	0.182126	0.246198	0.162442	0.0897307	0.137673	0.175663	0.209939	0.382968	0.39883	0.290604	0.249819	0.324823	0.230336	0.40283	0.309049	0.458282	0.221314	0.446357	0.395507	0.301769	0.253708	0.321372	0.316285	0.366239	0.266403	0.187688	0.26627	0.218037	0.172196	0.25577	0.116214	0.232052	0.18091	0.246538	0.226763	0.133055
ATAGTTAC	0.103124	0.135936	0.397233	0.32868	0.0470216	0.241502	0.201531	0.13975	0.0346972	0.19769	0.261348	0.143018	-0.00579592	0.0348944	0.114813	0.245324	0.117205	0.0861771	0.217703	0.198302	0.395356	0.38256	0.303535	0.297572	0.380662	0.24991	0.385505	0.394035	0.449286	0.205593	0.452142	0.404455	0.368483	0.334358	0.300133	0.341288	0.313528	0.291036	0.292672	0.235438	0.201456	0.185153	0.310635	0.165114	0.24081	0.025214	0.225057	0.0652236	0.0159849
ATGTTACG	-0.065475	0.101549	0.318799	0.175538	0.0745195	0.153646	0.177983	0.126666	0.192542	0.103519	0.214001	0.111281	0.0944823	0.172234	0.0566211	0.227582	0.132468	0.059276	0.198499	0.0043323	0.378865	0.289262	0.364054	0.133514	0.371094	0.120671	0.356877	0.297535	0.454356	0.154818	0.460923	0.420207	0.272455	0.179106	0.328614	0.376161	0.3785	0.319121	0.306834	0.231459	0.0719873	0.0841621	0.275555	0.239179	0.208715	0.243458	0.310033	0.216405	-0.00238725
ATGTAACC	0.242186	0.167908	0.225608	0.193993	0.234177	0.22365	0.228218	0.252203	0.10594	0.156634	0.0617567	0.0473274	0.161077	0.169481	0.244673	0.195711	0.198745	0.257949	0.116655	0.143535	0.411776	0.411941	0.370928	0.189676	0.39589	0.231877	0.373892	0.268935	0.470389	0.17106	0.427831	0.388088	0.379809	0.334756	0.327783	0.399379	0.359986	0.30851	0.245947	0.270655	0.189277	0.227415	0.234401	0.221424	0.131136	0.0479962	0.254862	0.285244	-0.0309753
GTATCGAA	-0.117522	0.00961147	-0.0974899	-0.0748542	-0.0306697	0.114868	-0.0515797	0.0466008	0.0449887	-0.0866995	0.0109651	0.0847129	0.0705186	0.042184	-0.0185314	0.037087	-0.0816078	0.0980317	0.0352116	0.0367917	0.311467	0.227598	0.147458	0.0431445	0.241094	0.0674527	0.348144	0.216325	0.459575	0.134939	0.443977	0.343059	0.380501	0.379694	0.332791	0.197275	0.345686	0.179262	0.203244	0.0216957	0.0477224	0.0698727	0.135076	-0.0824865	-0.00181207	-0.26925	-0.156864	-0.1767	-0.110237
CCGTTACA	-0.177728	0.133108	0.0918033	0.0448603	0.0986126	0.0547117	0.267225	0.163091	0.131827	0.154186	0.119226	-0.0643963	0.195393	0.0472984	0.122321	0.103433	0.231531	0.0272449	0.0767356	-0.0698261	0.360651	0.318471	0.252162	0.114973	0.277081	0.125602	0.325932	0.275119	0.45229	0.253603	0.424891	0.366506	0.270088	0.259211	0.361883	0.343714	0.332493	0.284435	0.26624	0.202446	0.213762	0.10308	0.287927	0.158165	0.276	0.130997	0.235072	0.210986	-0.0461425
AAGTAACG	0.100129	0.0022517	0.258275	0.187416	0.0239193	0.121668	0.229272	0.0998891	0.0855415	0.145182	0.0127116	0.153364	0.0679749	0.0716405	0.163022	0.101836	0.050871	0.0457124	0.143744	0.138335	0.402149	0.373707	0.276725	0.177719	0.379114	0.170884	0.37152	0.335534	0.473625	0.261307	0.433744	0.417675	0.343565	0.324715	0.265854	0.374958	0.323179	0.3457	0.184924	0.315066	0.10784	0.268049	0.217845	0.192296	0.0884267	0.115605	0.135192	0.202802	0.114788
AGTAACGA	0.0152631	0.0491015	0.23514	0.103033	0.0381213	0.0944677	0.0985879	0.0274352	-0.0637531	0.080797	-0.0298694	0.0413568	0.144946	0.045058	0.051009	0.0741471	-0.00836082	0.0343825	0.102409	0.133755	0.35955	0.377488	0.3137	0.112815	0.336087	0.125972	0.383419	0.320347	0.473559	0.215461	0.439625	0.403849	0.35238	0.236464	0.268288	0.371668	0.346905	0.338224	0.179471	0.244141	0.126386	0.196818	0.0985966	0.0787909	0.0695902	0.0181329	0.0748987	0.103411	0.11475
CTTGTTAC	-0.0311449	0.183152	0.249707	0.172303	0.262065	0.11389	0.112654	0.159313	0.231069	0.116344	0.240334	0.253774	0.132358	0.0855345	0.113414	0.102013	0.0274724	0.131113	0.160135	0.106334	0.393295	0.293364	0.351131	0.128477	0.345583	0.129806	0.39804	0.302022	0.46529	0.31541	0.446322	0.412063	0.362307	0.244007	0.36308	0.348497	0.353251	0.299367	0.208139	0.166646	0.0961733	0.195438	0.199426	0.202333	0.0690584	0.0752451	0.342645	0.207841	-0.0787876
AGTAACCA	0.113156	0.153206	0.339845	0.177154	0.159363	0.199518	0.271202	0.0239041	0.0805392	0.240248	0.260431	-0.0877614	0.217163	0.0856407	0.229416	0.216322	0.143354	0.0850561	0.16749	0.220423	0.408852	0.290514	0.374679	0.235242	0.360235	0.286117	0.399761	0.298101	0.466163	0.235755	0.440081	0.370314	0.382288	0.352682	0.320653	0.310809	0.339166	0.278227	0.288288	0.252033	0.220809	0.203624	0.251815	0.178089	0.132576	0.251801	0.258817	0.153925	0.0197622
GTAACGAA	-0.0749541	0.171089	0.207393	-0.00226949	0.28508	0.126715	0.213934	-0.0600683	0.11589	0.215847	0.157078	0.1522	0.223095	0.0262149	0.221923	0.0608487	0.167259	-0.0529249	0.241545	0.00467273	0.41295	0.30097	0.342604	0.136002	0.325317	0.146361	0.396032	0.268623	0.468567	0.236014	0.437757	0.385056	0.399931	0.206282	0.345803	0.272014	0.363962	0.235115	0.280423	0.130992	0.265634	0.184613	0.237557	0.0540775	0.23425	0.0416739	0.235205	-0.00957937	0.0140705
TGGTTACA	0.147887	0.146521	0.123701	0.059179	0.148233	0.0919067	0.117906	0.101112	0.149584	-0.0141821	0.194208	0.0371605	0.112275	0.0986351	0.1287	0.0604709	0.0313178	0.0104852	0.175429	0.179645	0.415084	0.432161	0.346364	0.185731	0.351443	0.181165	0.437106	0.340758	0.476471	0.237778	0.46013	0.443654	0.352844	0.353009	0.345888	0.436153	0.390279	0.336212	0.21233	0.270901	0.16804	0.114873	0.213919	0.038597	0.187885	-0.0282045	0.19604	0.2196	-0.041213
GATGTAAC	0.0193886	0.00801432	0.150456	0.106475	0.124163	0.275526	0.163039	0.25353	0.181794	-0.00202773	0.192809	0.0606933	0.00486837	0.145205	0.0398295	0.271457	-0.00639937	0.0522312	0.184804	0.0726276	0.403365	0.370733	0.322444	0.28539	0.334519	0.210436	0.393409	0.3304	0.472834	0.253593	0.443767	0.390907	0.314673	0.323033	0.374446	0.434947	0.358918	0.377363	0.275722	0.282519	0.236869	0.190071	0.29067	0.26044	0.103715	0.116098	0.253946	0.222937	-0.0999644
GTTACAAC	0.106444	-0.0437174	0.237806	0.216808	0.0814217	0.344613	0.305704	0.342418	0.17018	0.209273	0.180058	0.254118	0.188965	0.29618	0.302894	0.334722	0.191577	0.128278	0.108755	0.22944	0.417768	0.37837	0.305756	0.327152	0.356775	0.314073	0.385485	0.381609	0.466327	0.253313	0.451454	0.41936	0.366496	0.346851	0.361831	0.430181	0.387199	0.405986	0.239456	0.366627	0.249591	0.270884	0.297103	0.27772	0.102778	0.246124	0.402308	0.369561	0.00547241
AGTAGCAA	0.0933432	0.0112063	0.17118	0.246404	0.166819	0.207764	0.191711	0.35746	0.244049	0.190537	0.192803	0.284816	0.144806	0.316159	0.168772	0.170331	0.0882868	0.204173	0.150909	0.274901	0.397605	0.396376	0.269465	0.21544	0.339052	0.299949	0.367688	0.354307	0.469928	0.224707	0.452922	0.441397	0.293192	0.349735	0.328753	0.408043	0.425805	0.41978	0.223653	0.360616	0.241342	0.361203	0.073506	0.149541	0.221163	0.254143	0.427652	0.443233	0.102575
CGTTACAA	0.166085	0.161992	0.270723	0.257857	0.202245	0.284901	0.220479	0.211513	0.282703	0.243931	0.171704	0.251297	0.183252	0.173708	0.142635	0.275533	0.0566146	0.0644612	0.241017	0.235355	0.37669	0.384088	0.349526	0.34683	0.332802	0.33778	0.405265	0.416644	0.469272	0.408862	0.451626	0.451828	0.355558	0.364093	0.401595	0.419699	0.409924	0.417342	0.361448	0.34305	0.252115	0.375203	0.285485	0.328233	0.265855	0.28192	0.422213	0.419972	0.173638
ATAGTAAC	0.193905	0.06778	0.306625	0.348736	0.0908503	0.200428	0.180443	0.223274	0.17418	0.109106	0.214672	0.209623	0.24047	0.203056	0.173324	0.180664	0.0473247	-0.0681509	0.221642	0.315921	0.405185	0.438572	0.32414	0.272872	0.355988	0.288295	0.451067	0.453193	0.465023	0.208973	0.456567	0.467154	0.32322	0.36456	0.365425	0.422564	0.348773	0.424988	0.270203	0.31043	0.226663	0.238223	0.306661	0.227138	0.131645	0.10512	0.195393	0.267496	0.222003
TCGTTACA	0.0163318	0.174163	0.071209	0.041702	0.0981525	0.194681	0.200552	0.174495	0.170252	0.135261	0.191	0.260414	0.0357125	0.0716196	0.136199	0.0955548	0.142406	-0.0844285	0.267327	0.241492	0.436817	0.413979	0.375752	0.228879	0.39488	0.292298	0.458761	0.420504	0.486232	0.323332	0.476918	0.478316	0.426115	0.387747	0.40575	0.454217	0.434957	0.426498	0.305325	0.335226	0.315981	0.248029	0.282199	0.181899	0.216284	0.0487982	0.240394	0.235007	0.112917
ATTGTAGC	0.0242002	-0.0443265	0.158003	0.160371	0.200507	0.174835	0.235507	0.185116	0.126049	0.188388	0.263255	0.141021	0.271183	0.166711	0.221553	0.0718284	-0.0220738	-0.121538	0.138258	0.122705	0.384484	0.378814	0.34189	0.191537	0.338554	0.194579	0.42302	0.396064	0.439469	0.226187	0.443193	0.452527	0.311162	0.336795	0.311947	0.378257	0.392564	0.378835	0.264347	0.234432	0.193819	0.199487	0.216725	0.140434	0.157391	0.0424188	0.172836	0.219726	0.0435823
TCGCTACA	-0.218709	-0.147756	-0.137882	-0.0990979	-0.0742122	0.0749276	0.051009	0.189	0.265167	-0.0475971	0.0627185	0.243576	-0.0198829	0.11562	-0.0994485	0.0709583	0.0283803	0.0388408	-0.00364072	0.0129683	0.373659	0.397135	0.252209	0.0900907	0.301884	0.0624213	0.361404	0.394531	0.471148	0.116217	0.453793	0.456702	0.311265	0.28965	0.292445	0.379045	0.368816	0.330091	0.12183	0.172898	0.0609315	0.111781	0.037405	0.0166617	0.137174	-0.118977	-0.0515386	-0.0469968	-0.158004
GTTACTTA	0.11341	0.174867	0.330346	0.342741	0.128204	0.122887	0.231398	0.166079	0.193417	0.240069	0.0404441	0.255649	0.242762	0.230791	0.117141	0.124081	0.0221415	0.0794632	0.211674	0.19111	0.395917	0.393208	0.3603	0.201443	0.354164	0.20396	0.331111	0.390934	0.445665	0.275866	0.41205	0.461878	0.37862	0.303045	0.313095	0.357399	0.319878	0.344269	0.282103	0.281103	0.231684	0.179972	0.282982	0.134513	0.222009	0.0745407	0.233742	0.27559	0.178171
TATCAATA	0.205719	0.262553	0.337545	0.199764	0.1595	0.30895	0.231109	0.119614	0.196115	0.286853	0.20107	0.100604	0.117695	0.0994132	0.267361	0.291955	0.262217	0.0942395	0.258373	0.227851	0.395046	0.245994	0.420638	0.359282	0.415355	0.354803	0.374014	0.253959	0.400756	0.314299	0.39234	0.360152	0.451994	0.3712	0.283403	0.295318	0.346608	0.299491	0.335855	0.269266	0.291741	0.210491	0.344573	0.336488	0.211422	0.261494	0.268247	0.252728	0.229839
AACGATAC	-0.133442	-0.0242953	0.0591911	-0.210018	-0.0018378	0.0126366	0.112771	0.0214801	-0.0146386	0.0793064	0.0546961	-0.0499053	0.0846861	-0.0485527	0.0611262	0.0273483	-0.0682624	-0.157349	0.106601	-0.142829	0.321283	0.311475	0.273933	0.0761381	0.305332	0.0959899	0.289862	0.287427	0.441662	0.145005	0.391029	0.333757	0.462071	0.437064	0.327702	0.326282	0.313656	0.242448	0.22786	0.176122	0.173035	0.10283	0.196744	0.104913	0.0739456	0.00827136	-0.0152253	0.0220055	-0.24168
ACGATACA	-0.0179164	0.0858309	0.100218	-0.24698	0.28028	0.152131	0.258802	0.182801	0.0591963	0.166471	0.215	-0.0108833	0.251119	0.0532893	0.229266	0.212894	0.00385677	-0.0195493	0.130657	-0.0411186	0.341451	0.226023	0.320746	0.183184	0.332807	0.0928149	0.320438	0.0912421	0.455298	0.274283	0.371681	0.267225	0.464587	0.387555	0.333007	0.313232	0.361271	0.238011	0.259621	0.300925	0.103853	0.121697	0.296493	0.305541	0.0465431	0.204168	0.0737771	0.0106103	-0.104048
AAGATACT	-0.0855435	0.0525213	0.261995	0.278206	0.149502	0.160019	0.12522	0.183043	0.0505821	0.138267	0.109135	0.269386	0.150559	0.0836996	0.06641	0.114184	0.165473	0.0850032	0.10971	0.137623	0.397828	0.299747	0.306604	0.197934	0.390871	0.215123	0.363606	0.406863	0.425489	0.119302	0.342012	0.418189	0.472557	0.450775	0.250259	0.360999	0.306819	0.327925	0.161229	0.25887	0.101046	0.177411	0.150342	0.122254	0.0422428	-0.00284737	0.0738541	0.159259	0.0470785
GTATCTTA	0.114392	0.0214214	0.216999	0.217688	0.177553	0.263897	0.0928145	0.117074	0.0634694	0.180101	0.231004	0.158983	0.178082	0.0447895	0.148143	0.200161	0.0332486	0.1323	0.12375	0.180016	0.33092	0.299831	0.260563	0.242995	0.322826	0.225116	0.316748	0.261633	0.384791	0.135138	0.318747	0.379074	0.447839	0.452807	0.234694	0.357553	0.259679	0.294405	0.228929	0.264208	0.127426	0.171226	0.185639	0.172226	0.0255067	0.139336	0.0547964	0.114035	-0.0639287
AATGATAC	-0.0324415	0.058581	0.218928	0.182607	0.159031	0.24368	0.162967	0.129875	0.0607233	0.21537	0.0545849	0.0231389	0.142741	0.162255	0.198192	0.174702	-0.0204284	0.042941	0.275511	0.197185	0.44936	0.432577	0.329158	0.306197	0.420472	0.241393	0.437386	0.420014	0.477366	0.130975	0.4512	0.410467	0.485593	0.477804	0.413396	0.384524	0.455454	0.401577	0.348353	0.353374	0.286442	0.270285	0.253803	0.10632	0.243153	0.0174017	0.212906	0.217719	0.00446036
AAATGATA	0.263582	0.230826	0.361262	0.324926	0.213016	0.200012	0.151281	0.0325621	0.168343	0.167613	0.227634	0.268087	0.0101484	0.0268469	0.231952	0.17114	0.0105134	0.0446202	0.376567	0.249544	0.404416	0.379442	0.37463	0.296066	0.398856	0.346329	0.411133	0.428404	0.44392	0.195077	0.42241	0.410271	0.462952	0.45747	0.345252	0.306188	0.414101	0.417038	0.346819	0.320538	0.300542	0.28961	0.339047	0.184894	0.183294	0.111556	0.297235	0.24008	0.316965
AAAGATAC	0.0314691	0.14602	0.298335	0.35652	-0.0104004	0.0318087	0.0254297	0.165993	0.135042	0.0166374	0.0419435	0.238683	0.0805184	0.0382827	-0.091556	0.000750454	-0.0407055	-0.050025	0.158452	0.117937	0.374486	0.347712	0.285019	0.164938	0.349588	0.192291	0.352629	0.430421	0.455475	0.243496	0.422682	0.411238	0.459121	0.457331	0.303292	0.363841	0.360732	0.358401	0.240366	0.29199	0.180049	0.130099	0.10967	0.0374153	0.0784086	-0.0459088	0.241683	0.130679	0.111658
GTATCTAA	0.0812148	0.043047	0.2026	0.165331	0.149501	0.122383	0.0953863	0.101395	-0.0160787	0.0670789	0.254657	0.206991	-0.0114382	0.0270587	0.113014	0.12372	-0.00374441	-0.030434	0.233984	0.159097	0.350153	0.396274	0.273482	0.220613	0.353122	0.25428	0.353405	0.392281	0.457924	0.107584	0.426425	0.441925	0.445526	0.464965	0.321025	0.38419	0.32201	0.383393	0.262536	0.23858	0.204756	0.226818	0.237887	0.0671126	0.119852	-0.0453182	0.197891	0.0882094	0.08301
GGATACAA	0.0453387	-0.0732331	0.1574	0.0142719	0.0779147	0.0775969	0.151782	-0.00188757	0.257755	0.116094	0.0432278	0.269789	-0.0422196	-0.0960368	0.0872271	0.135713	0.0245943	-0.138405	0.198633	0.0951751	0.373965	0.330558	0.353422	0.18653	0.375812	0.242423	0.379561	0.401789	0.454266	0.274458	0.438393	0.442587	0.433645	0.391128	0.319424	0.397931	0.377919	0.353476	0.242562	0.191772	0.13922	0.144289	0.218908	0.0960671	0.0272529	0.0403834	-0.0128958	-0.124565	-0.0456867
CGATACAA	0.0878981	0.0589339	0.0531678	-0.0125698	0.0792919	0.143926	0.174477	0.245463	0.27997	0.0955835	0.0144161	0.193069	0.19459	0.136504	0.110004	0.149578	-0.114691	-0.0350525	0.0804483	0.21593	0.378702	0.381843	0.378889	0.22292	0.400673	0.272101	0.424188	0.414749	0.475384	0.266227	0.459886	0.460523	0.442115	0.456316	0.394632	0.439651	0.433174	0.407906	0.297461	0.382963	0.141941	0.26795	0.227901	0.235962	0.0503407	0.264449	-0.0125986	0.168617	0.0988
GATACAAC	-0.0733127	-0.0344791	0.0737452	-0.0176375	0.0833902	0.199678	0.206764	0.266094	0.267081	0.145379	0.0238447	0.204294	-0.0103817	0.230331	0.1762	0.221995	-0.0124693	0.0756859	0.0748464	0.165462	0.358306	0.342151	0.186987	0.198208	0.327496	0.213335	0.387124	0.360591	0.453906	0.179878	0.42933	0.426535	0.42933	0.442436	0.396602	0.435569	0.398804	0.367479	0.223159	0.314269	0.19163	0.181822	0.302566	0.235796	-0.000530284	0.079825	0.0891782	0.0281328	-0.11261
GATACTTA	-0.112148	-0.0290335	0.315775	0.238788	0.0118604	-0.0691841	0.22385	0.102581	-0.0398627	0.167795	0.211057	0.126034	0.00237083	0.139768	0.0523344	-0.123882	-0.0269451	0.0374933	0.27269	0.1279	0.380506	0.280837	0.320999	0.0259286	0.383026	0.122757	0.412143	0.295199	0.474622	0.103568	0.475761	0.379792	0.452892	0.390116	0.36272	0.329464	0.392102	0.281167	0.326118	0.252588	0.258168	0.177336	0.308854	-0.112726	0.164921	-0.184466	0.114032	0.0670915	0.124183
AAGTATCT	-0.0201988	0.0290456	0.318525	0.263996	0.172597	0.0546784	0.251905	0.244966	-0.0392134	0.234412	0.292759	0.155926	0.246931	0.180623	0.117267	0.0629293	0.0900061	0.235161	0.293192	0.116188	0.420413	0.346256	0.394109	0.0827566	0.393866	0.0799931	0.444343	0.391186	0.46984	0.187995	0.453978	0.393818	0.455616	0.441286	0.330943	0.320614	0.408659	0.275392	0.309955	0.21143	0.176686	0.172955	0.305783	0.044737	0.161324	-0.0498545	0.159108	0.0689306	-0.0166681
ATCGATAC	0.0770516	0.102513	0.0549079	-0.135853	0.332754	0.172541	0.215216	0.135716	0.0796559	0.22165	0.286664	0.0962804	0.262415	0.132325	0.202765	0.171899	0.0686335	0.0176596	0.179625	0.0795567	0.416455	0.349364	0.385395	0.228546	0.382865	0.243626	0.425997	0.339691	0.463784	0.210646	0.442636	0.390338	0.465252	0.4139	0.38241	0.332623	0.398187	0.313826	0.288922	0.254318	0.26932	0.183505	0.247585	0.165105	0.252234	0.293975	0.0148357	0.0290293	-0.135556
CTTGATAC	0.0642157	0.0414573	0.107052	0.197958	0.205558	0.167695	0.232972	0.191321	0.258268	0.259456	0.25903	0.21488	0.211236	0.269568	0.194613	0.154269	-0.00839363	0.188428	0.281074	0.21802	0.394595	0.287545	0.318674	0.244226	0.35466	0.268108	0.381032	0.264715	0.459378	0.211119	0.432054	0.379863	0.448545	0.369863	0.401903	0.345418	0.390247	0.340413	0.249395	0.28192	0.211384	0.249069	0.244156	0.143451	0.195088	0.0756473	0.109639	0.164561	0.197684
AAGTATCC	-0.118442	-0.239469	0.144415	0.107255	-0.0695285	0.0126877	0.114996	0.0675455	0.0220317	0.0483446	-0.092771	-0.121538	-0.0969388	0.0463094	-0.0351445	-0.00248008	-0.0591635	0.0543781	0.00972063	0.0353315	0.341296	0.293166	0.261324	0.136066	0.288075	0.0935012	0.321812	0.269775	0.457448	0.112927	0.431329	0.29485	0.443106	0.388144	0.168267	0.282069	0.288529	0.264588	0.0371682	0.154757	-0.0438845	0.0354193	0.0213662	-0.013326	-0.0865182	-0.05184	-0.139794	-0.0931106	0.00176751
AGTATCTA	0.162097	-0.0745848	0.142372	0.186212	0.0968431	0.298774	0.163217	0.207848	0.109203	0.0781704	0.184823	0.196738	0.102616	0.197691	0.0410631	0.245939	-0.0628875	0.111383	0.154239	0.222022	0.365004	0.340438	0.355383	0.323573	0.340754	0.294083	0.418992	0.322588	0.465551	0.194281	0.442147	0.403962	0.453609	0.430881	0.3312	0.35073	0.363958	0.329273	0.13745	0.262818	0.124039	0.228442	0.233189	0.281448	0.146417	0.22569	0.11329	0.257104	0.225309
GTATCCAA	0.108207	0.161064	0.0157642	0.116318	0.130416	0.0570148	0.158459	0.16073	0.071606	0.177873	-0.097164	-0.00855029	0.0865254	0.157134	0.205734	-0.0188629	0.0405721	0.0313816	-0.0143616	0.021361	0.395257	0.373785	0.266923	0.0520535	0.325	0.165086	0.382123	0.260115	0.457773	0.248945	0.440128	0.379937	0.443652	0.412429	0.222104	0.36981	0.360079	0.318157	0.109914	0.19417	0.113249	0.132499	0.00190751	0.00712776	0.11429	-0.129757	-0.111126	0.0141437	0.00971681
CGGATACA	-0.0177382	0.15226	0.184552	-0.0761934	0.269621	0.169714	0.350958	0.157459	0.32574	0.325363	0.199354	0.291031	0.191921	0.207757	0.312398	0.0942361	0.170476	-0.0318793	0.165896	0.0812948	0.433612	0.29347	0.341989	0.187492	0.389149	0.177883	0.430356	0.367427	0.465534	0.179226	0.44294	0.4249	0.463326	0.353276	0.415613	0.434805	0.389416	0.332582	0.319973	0.254303	0.301427	0.152818	0.328887	0.151081	0.252773	0.133369	0.156999	0.0699418	-0.149621
GATACAAA	0.201789	0.309373	0.370408	0.269915	0.315859	0.285432	0.353163	0.256868	0.254146	0.347535	0.296077	0.260861	0.252635	0.179154	0.337252	0.267369	0.240151	0.0999912	0.322858	0.270079	0.467344	0.409916	0.425486	0.323794	0.454298	0.334474	0.461112	0.393678	0.475843	0.287263	0.478943	0.431899	0.487712	0.44968	0.414416	0.402782	0.465066	0.387827	0.401257	0.350155	0.397755	0.318807	0.370333	0.185499	0.32219	0.228162	0.27675	0.188068	0.235104
ATAGATAC	0.0688471	0.160493	0.167657	0.097934	0.209246	0.0654304	0.14053	0.049675	0.0445705	0.159678	0.118886	0.00284293	0.203234	0.127968	0.0307279	0.109749	0.150868	0.0510414	0.22256	0.111005	0.427358	0.301201	0.352071	0.217654	0.349563	0.201578	0.403535	0.389137	0.464479	0.323173	0.442132	0.431962	0.45809	0.446536	0.38203	0.386553	0.384114	0.362648	0.33503	0.235788	0.349837	0.105468	0.287483	0.124159	0.283955	0.0810549	0.20413	0.0791894	-0.0704974
AGTATCAA	0.101067	0.157719	0.233837	0.218832	0.213283	0.228651	0.251285	0.140487	0.182436	0.268486	0.254147	0.270963	0.284038	0.14818	0.213222	0.195395	0.212863	0.0328117	0.290972	0.101066	0.461716	0.377587	0.404393	0.325766	0.432341	0.309496	0.44439	0.430889	0.484528	0.347338	0.473394	0.460103	0.48356	0.452331	0.43708	0.444004	0.453197	0.431514	0.36684	0.336103	0.349665	0.298139	0.319531	0.253667	0.263326	0.00592324	0.234665	0.174305	0.0750925
GTATCAAA	0.281818	0.117641	0.229264	0.191528	0.113581	0.25167	0.298233	0.129846	0.210701	0.263	0.212007	0.195347	0.259809	0.111981	0.270466	0.229658	0.206902	0.153192	0.199763	0.202294	0.453731	0.405992	0.394835	0.312623	0.415862	0.350327	0.417357	0.417462	0.485269	0.323399	0.466533	0.450267	0.483496	0.464716	0.402323	0.446095	0.462303	0.440816	0.360605	0.28893	0.294116	0.313157	0.276433	0.194772	0.181353	0.0811099	0.265817	0.273433	0.229831
CTGATACA	-0.191721	0.073377	0.101728	-0.00307854	0.233818	0.213104	0.324563	0.263107	0.172292	0.273091	0.219412	0.0212761	0.177848	0.204837	0.244048	0.21884	0.20596	0.144209	0.262566	0.16333	0.4081	0.339528	0.308234	0.211852	0.378145	0.126289	0.419957	0.335699	0.461632	0.281691	0.43847	0.359747	0.430583	0.403827	0.45824	0.446649	0.447614	0.351022	0.366081	0.337182	0.329044	0.265209	0.35588	0.22508	0.250214	0.0521913	0.136415	0.0864101	0.0346655
GATACACA	-0.243415	0.192984	0.161457	0.0391751	0.230757	0.0579017	0.279754	0.126792	-0.0819375	0.260385	0.348253	-0.128904	0.175191	0.107775	0.237812	-0.0119654	0.159935	0.063665	0.137369	-0.0640572	0.388829	0.212865	0.297998	0.00821514	0.34671	-0.0809304	0.397395	0.147725	0.447546	0.103615	0.421782	0.241886	0.460289	0.37563	0.453066	0.380087	0.39005	0.194646	0.360895	0.183826	0.312703	0.0341168	0.369333	0.114785	0.318523	-0.192445	0.135384	-0.14828	-0.126761
GTGTATCA	0.118524	0.0331106	0.170054	0.166516	0.147381	0.245629	0.282184	0.179231	0.14738	0.226527	0.157833	-0.0940649	0.100013	0.205952	0.167504	0.236446	-0.00400823	0.148711	0.194321	0.231064	0.413414	0.30925	0.326284	0.243923	0.377319	0.213769	0.409959	0.284559	0.463349	0.27588	0.446726	0.362315	0.478443	0.39807	0.442179	0.426156	0.445347	0.368507	0.35987	0.343483	0.342349	0.317987	0.34513	0.250737	0.218147	0.167508	0.214569	0.144847	0.0346573
[truncated: 1 more columns]
