# Supplementary material for: Mapping and analysis of Caenorhabditis elegans transcription factor sequence specificities
Source: eLife. 2015 Apr 23;4:e06967. doi: 10.7554/eLife.06967 (PMC4434323; doi:10.7554/eLife.06967)
Supplement: Figure 8—source data 1. — DOI: http://dx.doi.org/10.7554/eLife.06967.024 [file elife06967s005.xls]

## Sheet: Enriched CMs
Figure 8-source data 1. Composite motif enrichment analysis of C. elegans TF ChIP-seq.
TF-11	PWM-12	TF1-FAM3	TF-24	PWM-25	TF2-FAM6	TF-CHIP7	PWM-DIST8	STEREO9	CTS10	MU11	SD12	LOG2-FC13	Z-SCORE14	P-VALUE15
NHR28	pTH9174	NHR	NHR70	pTH9174	NHR	NHR28L4	-3	1F2F	47	0.2	0.421637	7.87652	35.1	6.74076e-270
NHR28	pTH9174	NHR	NHR66	pTH10034	NHR	NHR28L4	-1	1F2F	72	1.3	0.674949	5.79141	33.1245	1.3214e-240
NHR28	pTH9174	NHR	NHR28	pTH9174	NHR	NHR28L4	-3	1F2F	47	0.3	0.483046	7.29155	30.5723	2.85599e-205
F23F12.9	pTH9055	bZIP	TBX38	pTH9462	T-box	F23F12.9EM	-5	2F1F	98	1.8	1.0328	5.76671	29.4551	1.08273e-190
NHR28	pTH9174	NHR	NHR70	pTH9174	NHR	NHR28L1	-3	1F2F	28	0.1	0.316228	8.12928	27.9	2.66806e-171
F23F12.9	pTH9055	bZIP	SYD9	pTH10717	C2H2 ZF	F23F12.9EM	0	1F2F	27	0.1	0.316228	4.74953	26.9	1.09811e-159
F23F12.9	pTH9055	bZIP	REF2	pTH9089	C2H2 ZF	F23F12.9EM	-4	2F1F	26	0.1	0.316228	8.02237	25.9	6.6597e-148
NHR28	pTH9174	NHR	SLR2	pTH10040	C2H2 ZF	NHR28L4	-2	1F2F	26	0.1	0.316228	8.02237	25.9	6.6597e-148
NHR28	pTH9174	NHR	NHR28	pTH9174	NHR	NHR28L4	4	1F2F	25	0.1	0.316228	7.96578	24.9	7.44016e-137
NHR28	pTH9174	NHR	ODR7	pTH9323	NHR	NHR28L1	-5	2F1F	25	0.1	0.316228	7.96578	24.9	7.44016e-137
NHR28	pTH9174	NHR	SLR2	pTH10040	C2H2 ZF	NHR28L1	-2	1F2F	25	0.1	0.316228	7.96578	24.9	7.44016e-137
F23F12.9	pTH9055	bZIP	ZTF3	pTH10629	C2H2 ZF	F23F12.9EM	-5	1F2F	36	0.3	0.483046	6.90689	23.3711	8.40377e-121
LSY2	pTH10810	C2H2 ZF	TBX38	pTH9462	T-box	LSY2EM	-4	2F1F	38	0.6	0.516398	5.98489	22.9027	4.36416e-116
DMD6	pTH10816	DM	F23F12.9	pTH9055	bZIP	F23F12.9EM	10	1F2F	87	5	1.1547	4.12102	22.4566	1.10252e-111
DMD4	pTH10640	DM	F23F12.9	pTH9055	bZIP	F23F12.9EM	8	1F2F	50	0.6	0.699206	6.38082	22.342	1.4446e-110
NHR28	pTH9174	NHR	NHR28	pTH9174	NHR	NHR28L1	-3	1F2F	28	0.2	0.421637	7.12928	20.85	1.52423e-96
F23F12.9	pTH9055	bZIP	ZTF27	pTH9165	C2H2 ZF	F23F12.9EM	-3	1F2F	56	0.9	0.875595	5.95936	19.8998	4.08706e-88
NHR28	pTH9174	NHR	ODR7	pTH9323	NHR	NHR28L4	-5	2F1F	30	0.3	0.483046	6.64386	19.4432	3.32658e-84
F23F12.9	pTH9055	bZIP	NHR168	pTH10013	NHR	F23F12.9EM	0	2F1F	71	1.7	1.1595	5.38421	18.9	1.14053e-79
F23F12.9	pTH9055	bZIP	NHR42	pTH9085	NHR	F23F12.9EM	9	1F2F	58	2.4	0.966092	4.59495	18.1994	5.22028e-74
F10B5.3	pTH9177	C2H2 ZF	F23F12.9	pTH9055	bZIP	F23F12.9EM	5	1F2F	29	0.5	0.527046	5.85798	17.1	1.48404e-65
F23F12.9	pTH9055	bZIP	GEI3	pTH10038	Sox	F23F12.9EM	10	1F2F	56	2.9	0.994429	4.2713	16.8858	5.7268e-64
F23F12.9	pTH9055	bZIP	MAB23	pTH9082	DM	F23F12.9EM	-2	2F1F	140	11.8	2.4404	3.56857	16.6122	5.68784e-62
F23F12.9	pTH9055	bZIP	NHR66	pTH10034	NHR	F23F12.9EM	-1	2F1F	61	1	1.1547	5.93074	16.4317	1.13477e-60
NHR28	pTH9174	NHR	NHR70	pTH9174	NHR	NHR28L4	4	1F2F	25	0.3	0.483046	6.38082	16.1699	8.21708e-59
LSY2	pTH10810	C2H2 ZF	TBX38	pTH9462	T-box	LSY2L2	-4	2F1F	35	0.6	0.699206	5.86625	15.558	1.40451e-54
DMD5	pTH10777	DM	F23F12.9	pTH9055	bZIP	F23F12.9EM	1	2F1F	69	1.9	1.37032	5.18253	15.4846	4.4069e-54
NHR28	pTH9174	NHR	NHR66	pTH10034	NHR	NHR28L4	6	1F2F	35	1.2	0.788811	4.86625	13.5501	7.90738e-42
F23F12.9	pTH9055	bZIP	GEI3	pTH10038	Sox	F23F12.9EM	2	2F1F	66	3.2	1.47573	4.36632	13.4571	2.79517e-41
F23F12.9	pTH9055	bZIP	MAB23	pTH9082	DM	F23F12.9EM	8	2F1F	121	10	2.62467	3.59694	13.3736	8.62605e-41
DMD4	pTH10640	DM	F23F12.9	pTH9055	bZIP	F23F12.9EM	2	2F1F	64	1.3	1.49443	5.62149	13.2676	3.5706e-40
LSY2	pTH10810	C2H2 ZF	TBX38	pTH9462	T-box	LSY2L4	-4	2F1F	35	1	0.816497	5.12928	13.1681	1.33849e-39
NHR28	pTH9174	NHR	NHR66	pTH10034	NHR	NHR28L4	-5	2F1F	52	1.8	1.22927	4.85244	12.9138	3.76052e-38
NHR28	pTH9174	NHR	NHR66	pTH10034	NHR	NHR28L1	-1	1F2F	39	1	0.942809	5.2854	12.7456	3.29896e-37
NHR28	pTH9174	NHR	SCRT1	pTH10623	C2H2 ZF	NHR28L4	-4	2F1F	72	5.1	1.66333	3.81943	12.7188	4.64674e-37
F23F12.9	pTH9055	bZIP	FKH9	pTH9957	Forkhead	F23F12.9EM	2	1F2F	53	1.9	1.28668	4.80192	12.5588	3.55572e-36
F23F12.9	pTH9055	bZIP	MAB23	pTH9082	DM	F23F12.9EM	-4	2F1F	127	14	2.90593	3.18133	12.2968	9.42078e-35
CEH36	pTH10730	HOX	F23F12.9	pTH9055	bZIP	F23F12.9EM	3	1F2F	46	1.3	1.1595	5.14505	12.1909	3.47523e-34
F23F12.9	pTH9055	bZIP	SCRT1	pTH10623	C2H2 ZF	F23F12.9EM	3	2F1F	58	5.8	1.39841	3.32193	11.8042	3.71442e-32
LSY2	pTH10810	C2H2 ZF	Y48G1C.6	pTH10769	CENPB	LSY2EM	-3	2F1F	36	0.7	0.948683	5.6845	11.7667	5.79701e-32
NHR28	pTH9174	NHR	NHR66	pTH10034	NHR	NHR28EM	-1	1F2F	30	0.8	0.788811	5.22882	11.706	1.18692e-31
NHR28	pTH9174	NHR	ODR7	pTH9323	NHR	NHR28L4	-2	1F2F	25	0.3	0.674949	6.38082	11.5725	5.68191e-31
LSY2	pTH10810	C2H2 ZF	Y48G1C.6	pTH10769	CENPB	LSY2L2	-3	2F1F	28	1.1	0.737865	4.66985	11.5286	9.47021e-31
F23F12.9	pTH9055	bZIP	NHR154	pTH10650	NHR	F23F12.9EM	2	2F1F	25	1	0.666667	4.64386	11.3842	5.01264e-30
F23F12.9	pTH9055	bZIP	GEI3	pTH10038	Sox	F23F12.9EM	-4	1F2F	191	19.8	4.77959	3.27	11.327	9.64933e-30
LSY2	pTH10810	C2H2 ZF	TBX38	pTH9462	T-box	LSY2L1	-4	2F1F	36	0.9	0.994429	5.32193	11.1618	6.27246e-29
DMD3	pTH10638	DM	F23F12.9	pTH9055	bZIP	F23F12.9EM	1	2F1F	78	3.1	2.13177	4.65313	11.1107	1.11284e-28
F23F12.9	pTH9055	bZIP	FKH9	pTH9957	Forkhead	F23F12.9EM	8	2F1F	54	2	1.49071	4.75489	11.0309	2.71241e-28
LSY2	pTH10810	C2H2 ZF	T07C12.11	pTH9096	MADF	LSY2EM	4	2F1F	30	0.6	0.843274	5.64386	11.025	2.89519e-28
LSY2	pTH10810	C2H2 ZF	Y53H1A.2	pTH9934	C2H2 ZF	LSY2EM	8	1R2F	29	0.7	0.823273	5.37255	10.8703	1.59621e-27
F23F12.9	pTH9055	bZIP	MBR1	pTH10031	Pipsqueak	F23F12.9EM	8	1F2F	30	1.4	0.843274	4.42146	10.725	7.76871e-27
LSY2	pTH10810	C2H2 ZF	SCRT1	pTH10623	C2H2 ZF	LSY2EM	2	1R2F	38	5.4	0.966092	2.81497	10.6709	1.39339e-26
F23F12.9	pTH9055	bZIP	MBR1	pTH10031	Pipsqueak	F23F12.9EM	-1	2F1F	33	1.6	0.966092	4.36632	10.2781	8.84884e-25
LSY2	pTH10810	C2H2 ZF	Y48G1C.6	pTH10769	CENPB	LSY2L4	-3	2F1F	28	0.6	0.843274	5.54432	10.275	9.13444e-25
CEH34	pTH9708	HOX	F23F12.9	pTH9055	bZIP	F23F12.9EM	1	2F1F	53	1.9	1.59513	4.80192	10.1303	4.052e-24
F23F12.9	pTH9055	bZIP	POP1	pTH9135	Sox	F23F12.9EM	9	1F2F	37	4.2	1.0328	3.13906	10.0429	9.87201e-24
FKH9	pTH9957	Forkhead	NHR28	pTH9174	NHR	NHR28L1	-4	1F2R	32	1.4	0.966092	4.51457	10.0162	1.29381e-23
CEH52	pTH10772	HOX	NHR28	pTH9174	NHR	NHR28L4	-4	1F2R	47	4.7	1.33749	3.32193	10.0011	1.50681e-23
F23F12.9	pTH9055	bZIP	SCRT1	pTH10623	C2H2 ZF	F23F12.9EM	-5	1F2F	120	7	3.59011	4.09954	9.95338	2.43754e-23
C07E3.6	pTH9923	HOX	F23F12.9	pTH9055	bZIP	F23F12.9EM	3	2F1F	28	1.5	0.849837	4.22239	9.86076	6.15806e-23
F23F12.9	pTH9055	bZIP	Y61A9LA.9	pTH10624	bZIP	F23F12.9EM	-2	2F1F	38	2.3	1.1595	4.04629	9.73636	2.10969e-22
NHR28	pTH9174	NHR	NHR66	pTH10034	NHR	NHR28L1	-5	2F1F	30	1	0.942809	4.90689	9.7269	2.31552e-22
C46E10.8	pTH9900	C2H2 ZF	F23F12.9	pTH9055	bZIP	F23F12.9EM	0	2F1F	28	1.1	0.875595	4.66985	9.71514	2.59896e-22
F23F12.9	pTH9055	bZIP	NHR42	pTH9085	NHR	F23F12.9EM	1	2F1F	66	2.5	2.06828	4.72247	9.70878	2.76631e-22
F23F12.9	pTH9055	bZIP	SCRT1	pTH10623	C2H2 ZF	F23F12.9EM	10	2F1F	45	5.2	1.31656	3.11334	9.55965	1.18155e-21
CEH26	pTH9164	Prospero	F23F12.9	pTH9055	bZIP	F23F12.9EM	2	1F2F	53	2.3	1.70294	4.52629	9.41475	4.74193e-21
F23F12.9	pTH9055	bZIP	LIN31	pTH9116	Forkhead	F23F12.9EM	3	1F2F	25	0.7	0.823273	5.15843	9.33389	1.02056e-20
LSY2	pTH10810	C2H2 ZF	Y48G1C.6	pTH10769	CENPB	LSY2L4	5	2F1F	25	0.7	0.823273	5.15843	9.33389	1.02056e-20
F23F12.9	pTH9055	bZIP	Y61A9LA.9	pTH10624	bZIP	F23F12.9EM	6	2F1F	41	1.5	1.35401	4.77259	9.22521	2.82999e-20
NHR28	pTH9174	NHR	SCRT1	pTH10623	C2H2 ZF	NHR28L1	-1	1F2F	37	5.1	1.1005	2.85896	9.1664	4.89091e-20
EGRH3	pTH10722	C2H2 ZF	F23F12.9	pTH9055	bZIP	F23F12.9EM	4	2F1F	25	0.6	0.843274	5.38082	9.15	5.69335e-20
NHR28	pTH9174	NHR	SCRT1	pTH10623	C2H2 ZF	NHR28L4	-1	1F2F	52	4.5	1.64992	3.53051	9.10399	8.7072e-20
F23F12.9	pTH9055	bZIP	SCRT1	pTH10623	C2H2 ZF	F23F12.9EM	4	2F1F	61	6.5	1.90029	3.2303	9.06935	1.19731e-19
F23F12.9	pTH9055	bZIP	NHR66	pTH10034	NHR	F23F12.9EM	-3	1F2F	33	2.7	1.05935	3.61143	9.04489	1.49819e-19
F23F12.9	pTH9055	bZIP	TBX43	pTH9462	T-box	F23F12.9EM	-5	2F1F	36	1	1.24722	5.16993	8.87412	7.04887e-19
LSY2	pTH10810	C2H2 ZF	Y48G1C.6	pTH10769	CENPB	LSY2EM	5	2F1F	33	1.2	1.13529	4.78136	8.85767	8.17059e-19
F23F12.9	pTH9055	bZIP	MAB23	pTH9082	DM	F23F12.9EM	0	1F2F	116	10.4	3.77712	3.47947	8.84103	9.48437e-19
DMD5	pTH10777	DM	F23F12.9	pTH9055	bZIP	F23F12.9EM	9	1F2F	38	2.1	1.28668	4.17754	8.82313	1.11306e-18
PHA4	pTH9323	Forkhead	POP1	pTH9135	Sox	PHA4L3	-4	1F2F	101	38.2	2.25093	1.40271	8.82264	1.11794e-18
DMD5	pTH10777	DM	F23F12.9	pTH9055	bZIP	F23F12.9EM	-4	1F2F	30	1.2	1.0328	4.64386	8.81816	1.16353e-18
NHR28	pTH9174	NHR	NHR42	pTH9085	NHR	NHR28L4	-3	1F2F	66	3.8	2.25093	4.11839	8.73835	2.36549e-18
CEH52	pTH9174	NHR	F23F12.9	pTH9055	bZIP	F23F12.9EM	2	2F1F	27	2.9	0.875595	3.21883	8.7039	3.20678e-18
SKN1	pTH9913	bZIP	ZIP3	pTH9915	bZIP	SKN1L2	-4	1F2R	92	10.9	2.96086	3.07731	8.66171	4.64742e-18
F23F12.9	pTH9055	bZIP	ZTF16	pTH10805	C2H2 ZF	F23F12.9EM	4	1F2F	26	1.2	0.918937	4.43741	8.53427	1.41049e-17
SKN1	pTH9913	bZIP	SKN1	pTH9913	bZIP	SKN1L2	-4	1F2F	47	9.8	1.39841	2.26181	8.41217	4.02506e-17
CEH36	pTH10730	HOX	F23F12.9	pTH9055	bZIP	F23F12.9EM	9	2F1F	27	2	0.942809	3.75489	8.38525	5.06159e-17
F23F12.9	pTH9055	bZIP	K11D2.4	pTH10797	C2H2 ZF	F23F12.9EM	-4	1F2F	31	2.5	1.08012	3.63227	8.34395	7.1852e-17
NHR28	pTH9174	NHR	NHR42	pTH9085	NHR	NHR28L4	-3	2F1F	57	2.5	2.06828	4.51096	8.33273	7.89981e-17
C07E3.6	pTH9923	HOX	F23F12.9	pTH9055	bZIP	F23F12.9EM	-3	2F1F	28	1.9	0.994429	3.88136	8.29978	1.04301e-16
F23F12.9	pTH9055	bZIP	SCRT1	pTH10623	C2H2 ZF	F23F12.9EM	1	1F2F	66	7	2.26078	3.23704	8.25267	1.54898e-16
FKH9	pTH9957	Forkhead	NHR28	pTH9174	NHR	NHR28L4	-2	1R2F	29	2.2	1.0328	3.72048	8.20579	2.29078e-16
F23F12.9	pTH9055	bZIP	NHR42	pTH9085	NHR	F23F12.9EM	1	1F2F	26	2	0.942809	3.70044	8.04984	8.28991e-16
CEH51	pTH10772	HOX	F23F12.9	pTH9055	bZIP	F23F12.9EM	3	1F2F	54	4.4	1.95505	3.61738	8.02276	1.03397e-15
BLMP1	Mw137	C2H2 ZF	POP1	pTH9135	Sox	BLMP1EM	-5	1F2F	27	1.9	0.994429	3.82889	7.98178	1.44233e-15
BLMP1	Mw137	C2H2 ZF	MAB23	pTH9082	DM	BLMP1L1	-5	1F2F	38	4.8	1.31656	2.98489	7.97438	1.53145e-15
F23F12.9	pTH9055	bZIP	K11D2.4	pTH10797	C2H2 ZF	F23F12.9EM	8	1F2F	26	1.5	0.971825	4.11548	7.97219	1.55881e-15
F23F12.9	pTH9055	bZIP	POP1	pTH9135	Sox	F23F12.9EM	2	1F2F	34	3.9	1.19722	3.12399	7.95047	1.85803e-15
F23F12.9	pTH9055	bZIP	SCRT1	pTH10623	C2H2 ZF	F23F12.9EM	8	2F1F	45	5.7	1.56702	2.98089	7.93081	2.17717e-15
DMD6	pTH10816	DM	F23F12.9	pTH9055	bZIP	F23F12.9EM	6	1F2F	46	3.8	1.68655	3.59756	7.9125	2.52271e-15
DMD3	pTH10638	DM	F23F12.9	pTH9055	bZIP	F23F12.9EM	-5	1F2F	117	15.8	4.04969	2.88851	7.90239	2.73601e-15
LSY2	pTH10810	C2H2 ZF	R07H5.10	pTH10633	bZIP	LSY2L1	4	1R2F	27	1.2	1.0328	4.49185	7.8996	2.7979e-15
F23F12.9	pTH9055	bZIP	MAB23	pTH9082	DM	F23F12.9EM	4	1F2F	69	7.6	2.45855	3.18253	7.89751	2.84531e-15
NHR28	pTH9174	NHR	SCRT1	pTH10623	C2H2 ZF	NHR28L1	-4	2F1F	39	4	1.41421	3.2854	7.82624	5.02686e-15
F23F12.9	pTH9055	bZIP	MAB23	pTH9082	DM	F23F12.9EM	7	2F1F	92	9.8	3.32666	3.23078	7.81382	5.54803e-15
LIN29	pTH9930	C2H2 ZF	UNC130	pTH2846	Forkhead	UNC130L1	-1	1R2F	74	23.4	2.06559	1.66102	7.74651	9.44516e-15
CEH26	pTH9164	Prospero	F23F12.9	pTH9055	bZIP	F23F12.9EM	0	1F2F	41	2.7	1.56702	3.92459	7.72901	1.08386e-14
F23F12.9	pTH9055	bZIP	SCRT1	pTH10623	C2H2 ZF	F23F12.9EM	0	1F2F	62	6.5	2.27303	3.25376	7.72125	1.15192e-14
NHR28	pTH9174	NHR	POP1	pTH9135	Sox	NHR28L4	-5	1R2F	41	2.6	1.57762	3.97904	7.69712	1.39163e-14
NHR28	pTH9174	NHR	NHR42	pTH9085	NHR	NHR28L1	-3	1F2F	38	2.2	1.47573	4.11042	7.67143	1.70091e-14
NHR28	pTH9174	NHR	NHR66	pTH10034	NHR	NHR28L4	2	2F1F	30	1.1	1.19722	4.76939	7.63351	2.28448e-14
F23F12.9	pTH9055	bZIP	SCRT1	pTH10623	C2H2 ZF	F23F12.9EM	-2	1F2F	95	11.4	3.47051	3.05889	7.61751	2.58621e-14
CEH51	pTH10772	HOX	F23F12.9	pTH9055	bZIP	F23F12.9EM	-3	1F2F	63	6.5	2.36878	3.27684	7.54265	4.60512e-14
EGL43	pTH10718	C2H2 ZF	ELT1	pTH1049	GATA	ELT1L3	-5	1F2R	29	4	1.05409	2.85798	7.5	6.38178e-14
F23F12.9	pTH9055	bZIP	POP1	pTH9135	Sox	F23F12.9EM	-1	1F2F	55	5.9	2.079	3.22064	7.46841	8.11718e-14
F23F12.9	pTH9055	bZIP	Y61A9LA.9	pTH10624	bZIP	F23F12.9EM	6	1F2F	29	2.2	1.13529	3.72048	7.46495	8.33296e-14
C34D1.1	pTH9142	DM	F23F12.9	pTH9055	bZIP	F23F12.9EM	-5	1F2F	45	3.8	1.75119	3.56585	7.43985	1.00803e-13
F23F12.9	pTH9055	bZIP	SCRT1	pTH10623	C2H2 ZF	F23F12.9EM	-1	1F2F	63	8.6	2.319	2.87294	7.41818	1.18739e-13
F23F12.9	pTH9055	bZIP	SKN1	pTH9913	bZIP	F23F12.9EM	-4	2F1F	41	2.6	1.64655	3.97904	7.37492	1.64438e-13
F23F12.9	pTH9055	bZIP	R07H5.10	pTH10633	bZIP	F23F12.9EM	7	2F1F	31	1.6	1.26491	4.27612	7.35	1.98207e-13
NHR28	pTH9174	NHR	NHR42	pTH9085	NHR	NHR28L4	4	2F1F	32	2.5	1.2693	3.67807	7.34952	1.98912e-13
LSY2	pTH10810	C2H2 ZF	SCRT1	pTH10623	C2H2 ZF	LSY2EM	-1	1F2F	40	5.8	1.47573	2.78588	7.32857	2.32619e-13
F23F12.9	pTH9055	bZIP	NHR204	pTH10028	NHR	F23F12.9EM	-5	1F2F	51	4.1	2.02485	3.6368	7.32455	2.39703e-13
F23F12.9	pTH9055	bZIP	POP1	pTH9135	Sox	F23F12.9EM	-5	2F1F	49	6.6	1.83787	2.89224	7.29542	2.97728e-13
NHR28	pTH9174	NHR	POP1	pTH9135	Sox	NHR28L1	-5	1R2F	35	3.2	1.39841	3.45121	7.19105	6.4297e-13
MAB23	pTH9082	DM	PHA4	pTH9323	Forkhead	PHA4L3	-5	2F1F	197	85.8	4.89444	1.19915	7.18458	6.74118e-13
F23F12.9	pTH9055	bZIP	GEI3	pTH10038	Sox	F23F12.9EM	9	2F1F	34	3.4	1.3499	3.32193	7.16838	7.58928e-13
DMD3	pTH10638	DM	NHR28	pTH9174	NHR	NHR28L1	-1	1F2R	31	1.9	1.28668	4.0282	7.15189	8.55882e-13
MAB23	pTH9082	DM	SKN1	pTH9913	bZIP	SKN1L3	-4	1R2F	106	37.7	3.05687	1.49143	7.06552	1.60019e-12
F23F12.9	pTH9055	bZIP	K11D2.4	pTH10797	C2H2 ZF	F23F12.9EM	7	1F2F	31	1.3	1.33749	4.57568	7.02206	2.18615e-12
F23F12.9	pTH9055	bZIP	Y75B8A.6	pTH10798	CxxC	F23F12.9EM	7	1F2F	31	1.3	1.33749	4.57568	7.02206	2.18615e-12
NHR28	pTH9174	NHR	NHR42	pTH9085	NHR	NHR28L4	4	1F2F	25	2.2	1.0328	3.50635	6.98105	2.92991e-12
BLMP1	Mw137	C2H2 ZF	POP1	pTH9135	Sox	BLMP1L1	-5	1F2F	26	2.6	1.07497	3.32193	6.88368	5.83273e-12
NHR28	pTH9174	NHR	POP1	pTH9135	Sox	NHR28L4	-1	1F2R	49	4.7	2.05751	3.38205	6.80867	9.85029e-12
CEH52	pTH10772	HOX	F23F12.9	pTH9055	bZIP	F23F12.9EM	-2	1F2F	55	5.4	2.319	3.3484	6.76364	1.34571e-11
F23F12.9	pTH9055	bZIP	MAB23	pTH9082	DM	F23F12.9EM	1	1F2F	72	11.8	2.82056	2.60921	6.74934	1.4852e-11
F23F12.9	pTH9055	bZIP	MAB23	pTH9082	DM	F23F12.9EM	-2	1F2F	121	16.7	4.90011	2.85709	6.73098	1.68526e-11
CEH26	pTH9164	Prospero	F23F12.9	pTH9055	bZIP	F23F12.9EM	3	1F2F	25	2.4	1.07497	3.38082	6.64834	2.96423e-11
NHR232	pTH10647	NHR	SKN1	pTH9913	bZIP	SKN1L2	-5	2F1F	66	13.6	2.50333	2.27886	6.61931	3.60869e-11
CEH52	pTH10772	HOX	LSY2	pTH10810	C2H2 ZF	LSY2L1	-4	1F2F	36	4.5	1.50923	3	6.60017	4.10697e-11
LSY2	pTH10810	C2H2 ZF	R07H5.10	pTH10633	bZIP	LSY2EM	4	1R2F	28	2	1.24722	3.80735	6.5922	4.33347e-11
DMD3	pTH10638	DM	NHR28	pTH9174	NHR	NHR28L4	-3	1R2F	33	2.3	1.49443	3.84276	6.49623	8.2356e-11
F23F12.9	pTH9055	bZIP	SCRT1	pTH10623	C2H2 ZF	F23F12.9EM	7	1F2F	58	6.7	2.54078	3.11382	6.38485	1.71568e-10
ELT1	pTH1049	GATA	END1	pTH9880	GATA	ELT1L3	3	1F2F	59	8.7	2.54078	2.76163	6.26039	3.84024e-10
UNC130	pTH2846	Forkhead	ZTF3	pTH10629	C2H2 ZF	UNC130L1	-3	1R2F	36	3.7	1.63639	3.2824	6.24188	4.32349e-10
MAB23	pTH9082	DM	UNC130	pTH2846	Forkhead	UNC130L1	0	1F2F	206	81.7	6.37791	1.33424	6.163	7.13773e-10
CEH34	pTH9708	HOX	F23F12.9	pTH9055	bZIP	F23F12.9EM	-5	1F2F	71	8.7	3.19896	3.02873	6.15856	7.34073e-10
MAB23	pTH9082	DM	PHA4	pTH9323	Forkhead	PHA4L3	0	2F1F	95	32.7	3.19896	1.53864	6.15856	7.34073e-10
F23F12.9	pTH9055	bZIP	MAB23	pTH9082	DM	F23F12.9EM	-1	1F2F	73	10.5	3.24037	2.79751	6.09938	1.06484e-09
ELT1	pTH1049	GATA	END1	pTH9880	GATA	ELT1L3	4	2F1F	54	9.1	2.33095	2.56902	6.09134	1.11966e-09
FKH9	pTH9957	Forkhead	NHR28	pTH9174	NHR	NHR28L1	-2	1R2F	26	2	1.24722	3.70044	6.08511	1.16411e-09
ELT1	pTH1049	GATA	END3	pTH9073	GATA	ELT1L3	-4	1F2R	28	2.8	1.31656	3.32193	6.05284	1.4231e-09
ELT1	pTH1049	GATA	END1	pTH9880	GATA	ELT1L3	0	1F2F	47	11.2	1.8738	2.06916	6.04172	1.52478e-09
CEH51	pTH10772	HOX	NHR28	pTH9174	NHR	NHR28L4	3	1F2R	25	2.5	1.17851	3.32193	6.03738	1.56633e-09
DMD6	pTH10816	DM	F23F12.9	pTH9055	bZIP	F23F12.9EM	0	2F1F	73	6.1	3.5103	3.58102	6.02673	1.67312e-09
CEH51	pTH10772	HOX	F23F12.9	pTH9055	bZIP	F23F12.9EM	5	1F2F	40	3.6	1.95505	3.47393	5.88767	3.9168e-09
LSY2	pTH10810	C2H2 ZF	NHR232	pTH10647	NHR	LSY2EM	-5	1R2F	50	9.2	2.20101	2.44222	5.8619	4.57609e-09
LSY2	pTH10810	C2H2 ZF	SCRT1	pTH10623	C2H2 ZF	LSY2EM	5	1R2F	37	3.9	1.79196	3.24598	5.84118	5.18335e-09
UNC130	pTH2846	Forkhead	ZTF3	pTH10629	C2H2 ZF	UNC130L1	-5	1F2R	37	3.3	1.82878	3.48699	5.82731	5.63289e-09
MAB23	pTH9082	DM	PHA4	pTH9323	Forkhead	PHA4L3	-4	2F1F	149	56.8	5.00666	1.39135	5.82348	5.76345e-09
LSY2	pTH10810	C2H2 ZF	R07H5.10	pTH10633	bZIP	LSY2L2	4	1R2F	28	2	1.41421	3.80735	5.81378	6.10789e-09
DMD6	pTH10816	DM	F23F12.9	pTH9055	bZIP	F23F12.9EM	7	2F1F	26	4.1	1.19722	2.66482	5.78456	7.27013e-09
MAB23	pTH9082	DM	UNC130	pTH2846	Forkhead	UNC130L1	3	2F1F	195	83.8	6.12463	1.21845	5.74149	9.38456e-09
F23F12.9	pTH9055	bZIP	MAB23	pTH9082	DM	F23F12.9EM	9	2F1F	72	10.4	3.40588	2.79141	5.71942	1.06891e-08
MAB23	pTH9082	DM	PHA4	pTH9323	Forkhead	PHA4L4	-3	1F2F	105	38.6	3.68782	1.44372	5.69375	1.24277e-08
CEH51	pTH10772	HOX	F23F12.9	pTH9055	bZIP	F23F12.9EM	8	2F1F	67	4.4	3.50238	3.92859	5.65212	1.58485e-08
NHR28	pTH9174	NHR	SCRT1	pTH10623	C2H2 ZF	NHR28L4	6	1F2F	36	5.4	1.7127	2.73697	5.6499	1.60542e-08
BLMP1	Mw137	C2H2 ZF	MAB23	pTH9082	DM	BLMP1EM	-5	1F2F	39	3.3	2.00278	3.56294	5.63684	1.73197e-08
CEH52	pTH10772	HOX	NHR28	pTH9174	NHR	NHR28EM	-4	1F2R	36	4.4	1.77639	3.03242	5.62535	1.85138e-08
LSY2	pTH10810	C2H2 ZF	SCRT1	pTH10623	C2H2 ZF	LSY2EM	-4	2F1F	67	12.5	3.06413	2.42223	5.62457	1.8597e-08
LSY2	pTH10810	C2H2 ZF	R07H5.10	pTH10633	bZIP	LSY2L4	4	1R2F	27	1.5	1.43372	4.16993	5.62439	1.86163e-08
ELT1	pTH1049	GATA	END3	pTH9073	GATA	ELT1L2	1	2F1F	52	8.1	2.46982	2.68252	5.62082	1.90054e-08
CEH26	pTH9164	Prospero	F23F12.9	pTH9055	bZIP	F23F12.9EM	10	2F1F	33	2.5	1.71594	3.72247	5.6208	1.90075e-08
F23F12.9	pTH9055	bZIP	MBR1	pTH10031	Pipsqueak	F23F12.9EM	2	2F1F	33	2.6	1.7127	3.66588	5.61297	1.98881e-08
DMD3	pTH10638	DM	PHA4	pTH9323	Forkhead	PHA4L3	2	1R2F	30	8.9	1.19722	1.75309	5.57325	2.50024e-08
CEH26	pTH9164	Prospero	CEH26	pTH9164	Prospero	CEH26LE	-4	1F2F	52	14	2.16025	1.89308	5.56263	2.65738e-08
C07E3.6	pTH9923	HOX	F23F12.9	pTH9055	bZIP	F23F12.9EM	7	1F2F	28	1.5	1.50923	4.22239	5.55252	2.81579e-08
CEH26	pTH9164	Prospero	F23F12.9	pTH9055	bZIP	F23F12.9EM	5	2F1F	30	2.4	1.57762	3.64386	5.53231	3.16045e-08
UNC130	pTH2846	Forkhead	ZTF3	pTH10629	C2H2 ZF	UNC130L1	-3	1F2R	30	2.4	1.57762	3.64386	5.53231	3.16045e-08
LSY2	pTH10810	C2H2 ZF	Y48G1C.6	pTH10769	CENPB	LSY2L2	5	2F1F	25	1.4	1.3499	4.15843	5.52855	3.22886e-08
F23F12.9	pTH9055	bZIP	GEI3	pTH10038	Sox	F23F12.9EM	1	1F2F	32	3.8	1.61933	3.074	5.50699	3.65019e-08
F23F12.9	pTH9055	bZIP	MAB23	pTH9082	DM	F23F12.9EM	4	2F1F	51	10.9	2.33095	2.22617	5.44015	5.32345e-08
F23F12.9	pTH9055	bZIP	POP1	pTH9135	Sox	F23F12.9EM	8	2F1F	41	4	2.16025	3.35755	5.41625	6.08636e-08
SKN1	pTH9913	bZIP	ZIP3	pTH9915	bZIP	SKN1L3	-4	1F2R	39	8.6	1.77639	2.18107	5.41172	6.24207e-08
NHR28	pTH9174	NHR	SCRT1	pTH10623	C2H2 ZF	NHR28L4	10	2F1F	40	4	2.10819	3.32193	5.4	6.66409e-08
LIN39	pTH9116	HOX	Y61A9LA.9	pTH10624	bZIP	LIN39L1	-4	1F2F	45	10	2.0548	2.16993	5.38639	7.18884e-08
Column Name	Description
TF-11	Transcription Factor 1 (TF-1).
PWM-12	TF-1 Position Weight Matrix (PWM) ID (CIS-BP).
TF1-FAM3	TF-1 Family.
TF-24	Transcription Factor 2 (TF-2).
PWM-25	TF-2 PWM ID (CIS-BP).
TF2-FAM6	TF-2 Family.
TF-CHIP7	TF ChIP-seq peak file (modENCODE).
PWM-DIST8	Distance between matched PWMs.
STEREO9	Stereospecific orientation between PWM-1 and PWM-2.
CTS10	Counts of Composite Motif (CM) above threshold in TF ChIP-seq peak sequence.
MU11	Average counts of CM in dinucleotide shuffled (n=10) ChIP-seq peak sequences.
SD12	Standard Deviation of counts in Column I.
LOG2-FC13	Log2 Fold Change enrichment of CM over background.
Z-SCORE14	Z-score for CM.
P-VALUE15	P-value. Only significant results are included, using a Bonferroni False Discover Rate corrected P-value (alpha=0.05, n=635712).
