# Supplementary material for: Mapping and analysis of Caenorhabditis elegans transcription factor sequence specificities
Source: eLife. 2015 Apr 23;4:e06967. doi: 10.7554/eLife.06967 (PMC4434323; doi:10.7554/eLife.06967)
Supplement: Figure 9—source data 1. — DOI: http://dx.doi.org/10.7554/eLife.06967.031 [file elife06967s006.xlsx]

## Sheet: Sheet1
Figure 9- Source data 1: Table of motif enrichments (-log p-values)in the promoters of gene set categories identified from KEGG pathway modules, Gene Ontology processes and tissue/developmental stage specific expression lists
	EE_BAG	EE_GLP	L2_BWM	L2_glr_1	L2_intestine	L2_panneural	L3_L4_dopaminergic	LE_BWM_class	LE_coelomycetes	LE_dopaminergic	LE_hypodermis	LE_intestine	LE_Phm	beta_Oxidation_acyl_CoA_synthesis.KEGG	beta_Oxidation.KEGG
hlh-1	0	0	2.28361	0	0	0	0	1.31135	0	0	0	0	0	0	0
hlh-26	0	0	0	0	2.28361	0	0	0	0	0	0	0	0	0	0	V_type_ATPase_eukaryotes.KEGG	DNA_polymerase_alpha_primase_complex.KEGG	nucleosome.assembly	regulation.of.transcription..DNA.templated	protein.phosphorylation	protein.dephosphorylation	lipid.metabolic.process	cell.cycle	multicellular.organismal.development	metabolic.process	dephosphorylation	nonmotile.primary.cilium.assembly	peptidyl.tyrosine.dephosphorylation	intraciliary.transport	innate.immune.response	defense.response.to.Gram.negative.bacterium	defense.response.to.Gram.positive.bacterium	oxidation.reduction.process	V3.L2_A_class
hlh-12	0	0	2.97377	0	0	0	0	0.487727	0.102884	0	0	0	0	0	0	0	0	0	0	0	0	0	0	0	0	0	0	0	0	0	0	0	0	0.0138931
C27D6.4	0	0	0	0	0.084529	0	0	0	0	0	0	0.218436	0	0	0	0	0	0	0	3.8128	0	0	0	0	0.0557103	0	0	0	0	0	0	0	0	0
klf-2_klf-1	0	0	0	1.37577	0	1.24832	0	0	0	0	0	0	0	0	0	0	0	0	0	0	0	0	0	0	0	0	0	0	0	0	0	0	0	0
ces-1	0	0	0	0	0	0	0	0.109296	0	0	0.134522	0	0	0	0	0	0	1.09125	0	0	1.75306	0	0	0	0	2.05803	0	1.36779	0	0	0	0	0.0430095	0
lsy-2_lsl-1	0	7.76769	0	0	0	0	0	0	0	0	0	0	0	0	0	0	0	0	1.95676	0	0	0	0	1.55497	0	0	0	0	0	0	0	0	0	1.94889
lsl-1	0	8.04731	0	0	0	0	0	0	0	0	0	0	0	0	0	0	1.71634	0	0	0	0	0	0	0	0	0	0	0	0	0	0	0	0	0
klf-3_klf-1	0	0	0	1.24832	0	3.90436	0	0	0	0	0	0	0	0	0	0	0	0	0	0	0	0	0	0.0557103	0	0	0	0	0	0	0	0	0	0
ztf-14	0.0273935	0	0	1.42232	0	0	0	0	0	0	0	0	0	0	0	0	0	0	0	0	0	0	0	0	0	0	0	0	0	0	0	0	0	0
eor-1	0	0	0	0	0	0	0	0	0	0	0.267041	0	0	0	0	0	0	0	0.36448	0	0	0	0	0.721601	0	0	0	0	0	0	0	0	0	1.1226
ztf-19	0	0	7.12988	0	0	0	0	1.18328	0	0	0	0	0	0	0	0	0	0	0.109736	0	0	0	0	0	0	0	0	0	0	0	0	0	0	0.307834
sptf-3	0	0	0	1.31464	0	2.45914	0	0	0	0	0	0	0	0	0	0	0	0	0	0	0	0	0	0	0	0	0	0	0	0	0	0	0	2.83353
slr-2	0	0	0	0	0	0	0	0	0	0	0	0.179475	0	0	0	0	0	0	0	0	0	0	0	0	0	0	0	0	0	0	0	0	0	0
ZK337.2	0	0	0	0.452359	0	0	0	0	0	0	0	0	0	0	0	0	0	0	0	0	0	0	0	0.684198	0	0	0	0	0	0	0	0	0	1.02414
efl-2	0	1.99448	0	0	0	0	0	0	0	0	0	0	0	0	0	0	0	0	0	0	0	0	0	0	0	0	0	0	0	0	0	0	1.63313	0
fkh-7	0	0	0.0473252	0	0	0	0	0	0	0	0	0	2.04052	0	0	0	0	0	0	0	0	0	0	0	0	0	0	0	0	0	0	0	0	1.8257
unc-130_pha-4_lin-31_let-381_fkh-6_fkh-2_fkh-10	0	0	0	0	0.00272715	0	0	0	0.504535	0	0	0	1.37577	0	0	0	0	0	0	0	0	0	0	0	0	0	0	0	0	0	0	0	0	0
unc-130_let-381_fkh-6_fkh-2	0	0	0	0	0	0	0	0	3.33857	0	0	0	0	0	0	0	0	0	0	0	0	0	0	0	0	0	0	0	0	0	0	0	0	0
fkh-9	0	0	0	0	0	0	2.45914	0.0549255	0	0	0	0	0	0	0	0	0	0	0	0	0	0	0	0	0	0	0	0	0	0	0	0	0	0
elt-7	0	0	0	0	19.4261	0	0	0	0	0	0	21.6461	5.98913	0	0	0	0	0	0	0	0	0	0	0	0	0	0	0	0	0	0	0	0	0
elt-1	0	0	0	0	7.51152	0	0	0	0	0	0	9.08854	3.7053	0	0	0	0	0	0	0	0	0	0	0	0	0	0	0	0	0	0	0	0	0
elt-6_egl-18	0	0	0	0	18.3569	0	0	0	0	0	0	21.6798	7.14019	0	0	0	0	0	0	0	0	0.109736	0	0	1.13163	0	0	0	0	3.80356	0.144733	0.605002	0	0
end-1	0	0.199517	0	0	1.76717	0	0	0	0	0	0.179475	2.53458	1.37577	0	0	0	0	0	0	0	0	0	0	0	0	0	0	0	0	0	0	0	0	0
end-3	0	0	0	0	3.04375	0	0	0	0	0	0.0952555	8.40035	0.945454	0	0	0	0	0	0	0	0	2.28614	0	0	1.69974	0	0	0	0	2.44734	0	0.175014	0.266385	0
C01G12.1	0	0	0	0	0	0	0	0	0	0	0.109352	0	0	0	0	0	0	0	0	0	0	0	0	0	0	0	0	0	0	0	0	0	0	0
nhr-46	0	0.179247	0	0	0	0	0	0	0	0	0	0	0.0652535	0	0	0	0	0	0	0	0	0	0	0	0.490218	0	0	0	0	0	0	0	0	0
nhr-23	0	0	0	0	0	0	0	0	0.109296	0	1.80689	0	0	0	0	0	0	3.90345	0	0	0	0	0	0	0	0	0	0	0	0	0	0	0	0
sex-1	0	0	0	0	0	0	0	0	0.0662376	0.0946285	1.37577	0	0	0	0	1.62082	0	0	0	0	0	0	0	0	0	0	0	0	0	0	0	0	0	0
nhr-79	0	0	0	0	0.00121217	0	0	0	0	0	0	1.03117	0	0	2.05702	0	0	0	0	0	0	0	0	0	0	0	0	0	0	0	0	0	0	0
nhr-41	0	0	0	0	0	0	0	0	0	0	1.80804	0	0	0	0	0	0	0	0	0	0	0	0	0	0	0	0	0	0	0	0	0	0	0
daf-19	8.70807	0	0	0	0	0.757118	0.456933	0	0	1.37577	0	0	0	0	0.27142	0	0	0	0	0	0	0	0	0	0	0	0	0	0	0	0	0	0.672655	0
tbx-43	0	0	0	0	0	0.0582014	0	0	0	0.150579	0	0	0	0	0	0	0	0	0	0	0	0	0	0	0	0	0	0	0	0	0	0	0	0
tbx-40_tbx-39	0	0	0	0	0	0	0	0.00766183	0	0	0	0	0	0	0	0	0	0	0	0	0	0	0	0	0	0	2.9907	0	3.79109	0	0	0	0	0
efl-1	0	1.40065	0	0	0	0	0	0	0	0	0	0	0	0	0	0	0	0	0	0	0	0	0	0	0	0	0	0	0	0	0	0	0	2.90234
elt-3	0	0	0	0	18.4912	0	0	0	0	0	0	23.0102	6.12158	0	0.65797	0	0	3.62983	0	0	0	0	0	0	0	0	0	0	0	0	0	0	0	0
elt-1	0	0	0	0	0	0	0	0	0	0	1.99448	0	0.257062	0	0	0	0	0	0	0	0	0	1.4478	0	0	0	0	0	0	0	0	0	0	0
egl-27	0	0	0	0	20.4076	0	0	0	0	0	0	24.5796	9.78029	0	0	0	0	0	0	0	0	2.19764	0	0	3.2135	0	0	0	0	7.89119	2.77253	4.34071	1.16928	0
nhr-85	0	0	0	0	0	0	0	0	0	0.276948	1.32609	0	0	0	0	0	0	0	0	0	0	0	0	0	0	0	0	0	0	0	0	0	0	0
hlh-13	0	0	1.63242	0	0.0216467	0	0	1.37577	0	0	0	0	0	0	0	0	0	0	0	0	0	2.66025	0	0	6.4632	0	0	0	0	5.37182	3.03269	2.33714	0.786518	0
mab-9	0	0	0	0	0	0	0	0.365215	0	0	0	0	0	2.99524	0	0	0	0	0	0	0	0	0	0	0	0	0	0	0	0	0	0	0	0
klf-3_klf-2_klf-1	0	0	0	0.280162	0	0.757118	0	0	0	0	0	0	0	0	0	0	0	0	0	0	0	0	0	0	0	0	0	0	0	0	0	0	0	0
																0	0.109753	0	0	0	0	0	0	0	0	0	0	0	0	0	0	0	0	0
																0	0	0	1.39921	0	0	0	0	0.0173939	0	0	0	0	0	0	0	0	0	1.02414
