# Supplementary material for: Mapping and analysis of Caenorhabditis elegans transcription factor sequence specificities
Source: eLife journal article supplement (doi:10.7554/elife.06967), 2015-04-23
Supplement: supp [file elife-06967-supp-v1.zip]

| Composite Motif (CM)                                                                | ChIP TF<br>→     | Partner TF(s)<br>→                                                                                                                                                                          | CM Dataset Enrichment<br>(log <sub>2</sub> FoldChange )                                                                                                                                                                                                                                                                                                                                                                                                                                                                                                                                                                                                                                                                                                                                                                                                                                                                                                                                                        | Comments |
|-------------------------------------------------------------------------------------|------------------|---------------------------------------------------------------------------------------------------------------------------------------------------------------------------------------------|----------------------------------------------------------------------------------------------------------------------------------------------------------------------------------------------------------------------------------------------------------------------------------------------------------------------------------------------------------------------------------------------------------------------------------------------------------------------------------------------------------------------------------------------------------------------------------------------------------------------------------------------------------------------------------------------------------------------------------------------------------------------------------------------------------------------------------------------------------------------------------------------------------------------------------------------------------------------------------------------------------------|----------|
| 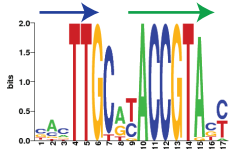   | LSY-2 (C2H2 ZF)  | SCRT-1 (C2H2 ZF)<br>Y48G1C.6 (CENPB)                                                                                                                                                        | SCRT-1 OLAP 4 2F1F (EM:2.42)<br>Y48G1C.6 OLAP 3 2F1F (L2:4.67)<br>Y48G1C.6 OLAP 3 2F1F (EM:5.68)<br>Y48G1C.6 OLAP 3 2F1F (L4:5.54)                                                                                                                                                                                                                                                                                                                                                                                                                                                                                                                                                                                                                                                                                                                                                                                                                                                                             |          |
|    | LSY-2 (C2H2 ZF)  | SCRT-1 (C2H2 ZF)<br>T07C12.11 (MADF)<br>Y48G1C.6 (CENPB)<br>Y53H1A.2 (C2H2 ZF)                                                                                                              | SCRT-1 GAP 5 1R2F (EM:3.25)<br>T07C12.11 GAP 4 2F1F (EM:5.64)<br>Y48G1C.6 GAP 5 2F1F (EM:4.78)<br>Y48G1C.6 GAP 5 2F1F (L2:4.16)<br>Y48G1C.6 GAP 5 2F1F (L4:5.16)<br>Y53H1A.2 GAP 8 1R2F (EM:5.37)                                                                                                                                                                                                                                                                                                                                                                                                                                                                                                                                                                                                                                                                                                                                                                                                              |          |
|    | NHR-28 (NHR)     | SCRT-1 (C2H2 ZF)                                                                                                                                                                            | SCRT-1 GAP 10 2F1F (L4:3.32)                                                                                                                                                                                                                                                                                                                                                                                                                                                                                                                                                                                                                                                                                                                                                                                                                                                                                                                                                                                   |          |
|  | NHR-28 (NHR)     | CEH-52 (Homeodomain)<br>DMD-3 (DM)<br>FKH-9 (Forkhead)<br>NHR-28 (NHR)<br>NHR-42 (NHR)<br>NHR-66 (NHR)<br>NHR-70 (NHR)<br>ODR-7 (NHR)<br>POP-1 (Sox)<br>SCRT-1 (C2H2 ZF)<br>SLR-2 (C2H2 ZF) | CEH-52 OLAP 4 1F2R (L4:3.32)<br>CEH-52 OLAP 4 1F2R (EM:3.03)<br>DMD-3 OLAP 3 1R2F (L4:3.84)<br>DMD-3 OLAP 1 1F2R (L1:4.03)<br>FKH-9 OLAP 2 1R2F (L1:3.7)<br>FKH-9 OLAP 4 1F2R (L1:4.51)<br>FKH-9 OLAP 2 1R2F (L4:3.72)<br>NHR-28 OLAP 3 1F2F (L1:7.13)<br>NHR-28 OLAP 3 1F2F (L4:7.29)<br>NHR-42 OLAP 3 2F1F (L4:4.51)<br>NHR-42 OLAP 3 1F2F (L1:4.11)<br>NHR-42 OLAP 3 1F2F (L4:4.12)<br>NHR-66 OLAP 1 1F2F (L4:5.79)<br>NHR-66 OLAP 5 2F1F (L1:4.91)<br>NHR-66 OLAP 1 1F2F (EM:5.23)<br>NHR-66 OLAP 1 1F2F (L1:5.29)<br>NHR-66 OLAP 5 2F1F (L4:4.85)<br>NHR-70 OLAP 3 1F2F (L4:7.88)<br>NHR-70 OLAP 3 1F2F (L1:8.13)<br>ODR-7 OLAP 5 2F1F (L4:6.64)<br>ODR-7 OLAP 5 2F1F (L1:7.97)<br>ODR-7 OLAP 2 1F2F (L4:6.38)<br>POP-1 OLAP 1 1F2R (L4:3.38)<br>POP-1 OLAP 5 1R2F (L1:3.45)<br>POP-1 OLAP 5 1R2F (L4:3.98)<br>SCRT-1 OLAP 1 1F2F (L1:2.86)<br>SCRT-1 OLAP 4 2F1F (L1:3.29)<br>SCRT-1 OLAP 4 2F1F (L4:3.82)<br>SCRT-1 OLAP 1 1F2F (L4:3.53)<br>SLR-2 OLAP 2 1F2F (L4:8.02)<br>SLR-2 OLAP 2 1F2F (L1:7.97) |          |
|  | NHR-28 (NHR)     | CEH-51 (Homeodomain)<br>NHR-28 (NHR)<br>NHR-42 (NHR)<br>NHR-42 (NHR)<br>NHR-66 (NHR)<br>NHR-66 (NHR)<br>NHR-70 (NHR)<br>SCRT-1 (C2H2 ZF)                                                    | CEH-51 GAP 3 1F2R (L4:3.32)<br>NHR-28 GAP 4 1F2F (L4:7.97)<br>NHR-42 GAP 4 1F2F (L4:3.51)<br>NHR-42 GAP 4 2F1F (L4:3.68)<br>NHR-66 GAP 6 1F2F (L4:4.87)<br>NHR-66 GAP 2 2F1F (L4:4.77)<br>NHR-70 GAP 4 1F2F (L4:6.38)<br>SCRT-1 GAP 6 1F2F (L4:2.74)                                                                                                                                                                                                                                                                                                                                                                                                                                                                                                                                                                                                                                                                                                                                                           |          |
|  | PHA-4 (Forkhead) | DMD-3 (DM)                                                                                                                                                                                  | DMD-3 GAP 2 1R2F (L3:1.75)                                                                                                                                                                                                                                                                                                                                                                                                                                                                                                                                                                                                                                                                                                                                                                                                                                                                                                                                                                                     |          |
