# Supplementary material for: Mapping and analysis of Caenorhabditis elegans transcription factor sequence specificities
Source: eLife journal article supplement (doi:10.7554/elife.06967), 2015-04-23
Supplement: supp [file elife-06967-supp-v1.zip]

| Composite Motif (CM)                                                                | ChIP TF<br>→    | Partner TF(s)<br>→                                                                                                                                                                                                                                                | CM Dataset Enrichment (log <sub>2</sub> FoldChange )                                                                                                                                                                                                                                                                                                                                                                                                                                                                                                                          | Comments                                           |
|-------------------------------------------------------------------------------------|-----------------|-------------------------------------------------------------------------------------------------------------------------------------------------------------------------------------------------------------------------------------------------------------------|-------------------------------------------------------------------------------------------------------------------------------------------------------------------------------------------------------------------------------------------------------------------------------------------------------------------------------------------------------------------------------------------------------------------------------------------------------------------------------------------------------------------------------------------------------------------------------|----------------------------------------------------|
| 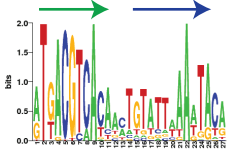   | F23F12.9 (bZIP) | C07E3.6 (Homeodomain)<br>CEH-36 (Homeodomain)<br>CEH-51 (Homeodomain)<br>DMD-4 (DM)<br>DMD-5 (DM)<br>DMD-6 (DM)<br>FKH-9 (Forkhead)<br>GEI-3 (Sox)<br>LIN-31 (Forkhead)<br>MAB-23 (DM)<br>NHR-42 (NHR)<br>R07H5.10 (bZIP)<br>SCRT-1 (C2H2 ZF)<br>Y61A9LA.9 (bZIP) | C07E3.6 GAP 7 1F2F (EM:4.22)<br>CEH-36 GAP 9 2F1F (EM:3.75)<br>CEH-51 GAP 8 2F1F (EM:3.93)<br>DMD-4 GAP 8 1F2F (EM:6.38)<br>DMD-5 GAP 9 1F2F (EM:4.18)<br>DMD-6 GAP 6 1F2F (EM:3.6)<br>DMD-6 GAP 10 1F2F (EM:4.12)<br>FKH-9 GAP 8 2F1F (EM:4.75)<br>GEI-3 GAP 10 1F2F (EM:4.27)<br>LIN-31 GAP 3 1F2F (EM:5.16)<br>MAB-23 GAP 8 2F1F (EM:3.6)<br>MAB-23 GAP 7 2F1F (EM:3.23)<br>NHR-42 GAP 9 1F2F (EM:4.59)<br>R07H5.10 GAP 7 2F1F (EM:4.28)<br>SCRT-1 GAP 8 2F1F (EM:2.98)<br>SCRT-1 GAP 7 1F2F (EM:3.11)<br>Y61A9LA.9 GAP 6 1F2F (EM:3.72)<br>Y61A9LA.9 GAP 6 2F1F (EM:4.77) |                                                    |
|    | F23F12.9 (bZIP) | C34D1.1 (DM)<br>DMD-3 (DM)                                                                                                                                                                                                                                        | C34D1.1 OLAP 5 1F2F (EM:3.57)<br>DMD-3 OLAP 5 1F2F (EM:2.89)                                                                                                                                                                                                                                                                                                                                                                                                                                                                                                                  |                                                    |
|   | F23F12.9 (bZIP) | C46E10.8 (C2H2 ZF)<br>CEH-26 (Prospero)<br>K11D2.4 (C2H2 ZF)<br>MAB-23 (DM)<br>MBR-1 (Pipsqueak)<br>NHR-42 (NHR)<br>POP-1 (Sox)<br>Y61A9LA.9 (bZIP)                                                                                                               | C46E10.8 GAP 0 2F1F (EM:4.67)<br>CEH-26 GAP 0 1F2F (EM:3.92)<br>K11D2.4 OLAP 4 1F2F (EM:3.63)<br>MAB-23 OLAP 2 1F2F (EM:2.86)<br>MAB-23 OLAP 1 1F2F (EM:2.8)<br>MBR-1 OLAP 1 2F1F (EM:4.37)<br>NHR-42 GAP 1 1F2F (EM:3.7)<br>POP-1 OLAP 1 1F2F (EM:3.22)<br>Y61A9LA.9 OLAP 2 2F1F (EM:4.05)                                                                                                                                                                                                                                                                                   |                                                    |
|  | F23F12.9 (bZIP) | CEH-26 (Prospero)<br>MBR-1 (Pipsqueak)<br>POP-1 (Sox)                                                                                                                                                                                                             | CEH-26 GAP 10 2F1F (EM:3.72)<br>MBR-1 GAP 8 1F2F (EM:4.42)<br>POP-1 GAP 8 2F1F (EM:3.36)                                                                                                                                                                                                                                                                                                                                                                                                                                                                                      |                                                    |
|  | F23F12.9 (bZIP) | CEH-26 (Prospero)<br>F10B5.3 (C2H2 ZF)<br>GEI-3 (Sox)<br>MAB-23 (DM)                                                                                                                                                                                              | CEH-26 GAP 3 1F2F (EM:3.38)<br>F10B5.3 GAP 5 1F2F (EM:5.86)<br>GEI-3 GAP 9 2F1F (EM:3.32)<br>MAB-23 GAP 9 2F1F (EM:2.79)                                                                                                                                                                                                                                                                                                                                                                                                                                                      | Partner TF can bind in either F or R configuration |
|  | F23F12.9 (bZIP) | CEH-26 (Prospero)                                                                                                                                                                                                                                                 | CEH-26 GAP 5 2F1F (EM:3.64)                                                                                                                                                                                                                                                                                                                                                                                                                                                                                                                                                   |                                                    |
|  | F23F12.9 (bZIP) | CEH-34 (Homeodomain)<br>NHR-66 (NHR)<br>SCRT-1 (C2H2 ZF)                                                                                                                                                                                                          | CEH-34 OLAP 5 1F2F (EM:3.03)<br>NHR-66 OLAP 3 1F2F (EM:3.61)<br>SCRT-1 OLAP 1 1F2F (EM:2.87)                                                                                                                                                                                                                                                                                                                                                                                                                                                                                  |                                                    |
|  | F23F12.9 (bZIP) | CEH-51 (Homeodomain)<br>K11D2.4 (C2H2 ZF)<br>POP-1 (Sox)                                                                                                                                                                                                          | CEH-51 GAP 5 1F2F (EM:3.47)<br>K11D2.4 GAP 7 1F2F (EM:4.58)<br>K11D2.4 GAP 8 1F2F (EM:4.12)<br>POP-1 GAP 9 1F2F (EM:3.14)                                                                                                                                                                                                                                                                                                                                                                                                                                                     |                                                    |
