# Supplementary material for: Mapping and analysis of Caenorhabditis elegans transcription factor sequence specificities
Source: eLife journal article supplement (doi:10.7554/elife.06967), 2015-04-23
Supplement: supp [file elife-06967-supp-v1.zip]

| TF     | Domain | PBM motif                                                                         | Previous motif                                                                                                      | Previous Study                                                   |
|--------|--------|-----------------------------------------------------------------------------------|---------------------------------------------------------------------------------------------------------------------|------------------------------------------------------------------|
| CHE-1  | C2H2   | 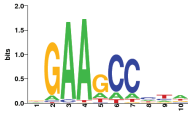 | <br>EMSA                           | Etchberger JF <i>et al</i> ,<br><i>Genes Development</i><br>2007 |
| SKN-1  | bZIP   |  | <br><i>de novo</i> motif discovery | Staab TA <i>et al</i> ,<br><i>PLoS Genetics</i><br>2013          |
| MAB-3  | DM     |  | <br>EMSA                           | Yi W <i>et al</i> ,<br><i>Development</i> 1999                   |
| DAF-12 | NHR    |  | <br>ChIP-seq                       | Hochbaum D<br><i>et al</i> , <i>PLoS Genetics</i><br>2011        |
| EFL-2  | E2F    |  | <br>PBM                            | Weirauch <i>et al</i> , <i>Cell</i><br>2014                      |
