# Supplementary material for: Mapping and analysis of Caenorhabditis elegans transcription factor sequence specificities
Source: eLife journal article supplement (doi:10.7554/elife.06967), 2015-04-23
Supplement: supp [file elife-06967-supp-v1.zip]

| Composite Motif (CM)                                                                | ChIP TF<br>→                                                | Partner TF(s)<br>→                                  | CM Dataset Enrichment<br>(log <sub>2</sub> FoldChange )                                                                                                     | Comments |
|-------------------------------------------------------------------------------------|-------------------------------------------------------------|-----------------------------------------------------|-------------------------------------------------------------------------------------------------------------------------------------------------------------|----------|
| 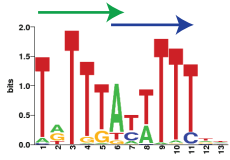   | PHA-4 (Forkhead)                                            | MAB-23 (DM)<br>PHA-4 (Forkhead)<br>POP-1 (Sox)      | MAB-23 OLAP 4 2F1F (L3:1.39)<br>PHA-4 OLAP 5 2F1F (L3:1.2)<br>POP-1 OLAP 4 1F2F (L3:1.4)                                                                    |          |
|    | PHA-4 (Forkhead)<br>UNC-130 (Forkhead)                      | MAB-23 (DM)                                         | MAB-23 GAP 0 2F1F (PHA-4 L3:1.54)<br>MAB-23 GAP 3 2F1F (UNC-130 L1:1.22)                                                                                    |          |
|    | LIN-39 (Forkhead)<br>PHA-4 (Forkhead)<br>UNC-130 (Forkhead) | MAB-23 (DM)<br>LIN-29 (C2H2 ZF)<br>Y61A9LA.9 (bZIP) | MAB-23 GAP 0 1F2F (UNC-130 L1:1.33)<br>MAB-23 OLAP 3 1F2F (PHA-4 L4:1.44)<br>LIN-29 OLAP 1 1R2F (UNC-130 L1:1.66)<br>Y61A9LA.9 OLAP 4 1F2F (LIN-39 L1:2.17) |          |
|    | SKN-1 (bZIP)                                                | MAB-23 (DM)<br>NHR-232 (NHR)<br>ZIP-3 (bZIP)        | MAB-23 OLAP 4 1R2F (L3:1.49)<br>NHR-232 OLAP 5 2F1F (L2:2.28)<br>ZIP-3 OLAP 4 1F2R (L2:3.08)<br>ZIP-3 OLAP 4 1F2R (L3:2.18)                                 |          |
|   | SKN-1 (bZIP)                                                | SKN-1 (bZIP)                                        | SKN-1 OLAP 4 1F2F (L2:2.26)                                                                                                                                 |          |
|  | UNC-130 (Forkhead)                                          | ZTF-3 (C2H2 ZF)                                     | ZTF-3 OLAP 3 1F2R (L1:3.64)<br>ZTF-3 OLAP 5 1F2R (L1:3.49)<br>ZTF-3 OLAP 3 1R2F (L1:3.28)                                                                   |          |
