# Supplementary material for: Mapping and analysis of Caenorhabditis elegans transcription factor sequence specificities
Source: eLife journal article supplement (doi:10.7554/elife.06967), 2015-04-23
Supplement: supp [file elife-06967-supp-v1.zip]

| Composite Motif (CM)                                                                | ChIP TF<br>→    | Partner TF(s)<br>→                                                                                                       | CM Dataset Enrichment<br>(log <sub>2</sub> FoldChange )                                                                                                                                                                   | Comments                                                                                  |
|-------------------------------------------------------------------------------------|-----------------|--------------------------------------------------------------------------------------------------------------------------|---------------------------------------------------------------------------------------------------------------------------------------------------------------------------------------------------------------------------|-------------------------------------------------------------------------------------------|
| 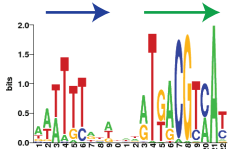   | F23F12.9 (bZIP) | DMD-6 (DM)<br>MAB-23 (DM)                                                                                                | DMD-6 GAP 7 2F1F (EM:2.66)<br>MAB-23 GAP 4 2F1F (EM:2.23)                                                                                                                                                                 |                                                                                           |
|    | F23F12.9 (bZIP) | EGRH-3 (C2H2 ZF)<br>MBR-1 (Pipsqueak)<br>SCRT-1 (C2H2 ZF)<br>ZTF-16 (C2H2 ZF)                                            | EGRH-3 GAP 4 2F1F (EM:5.38)<br>MBR-1 GAP 2 2F1F (EM:3.67)<br>SCRT-1 GAP 0 1F2F (EM:3.25)<br>ZTF-16 GAP 4 1F2F (EM:4.44)                                                                                                   |                                                                                           |
|    | F23F12.9 (bZIP) | GEI-3 (Sox)<br>NHR-204 (NHR)<br>SCRT-1 (C2H2 ZF)<br>SKN-1 (bZIP)                                                         | GEI-3 OLAP 4 1F2F (EM:3.27)<br>NHR-204 OLAP 5 1F2F (EM:3.64)<br>SCRT-1 OLAP 2 1F2F (EM:3.06)<br>SCRT-1 OLAP 5 1F2F (EM:4.1)<br>SKN-1 OLAP 4 2F1F (EM:3.98)                                                                |                                                                                           |
|    | F23F12.9 (bZIP) | GEI-3 (Sox)                                                                                                              | GEI-3 GAP 1 1F2F (EM:3.07)                                                                                                                                                                                                |                                                                                           |
|   | F23F12.9 (bZIP) | MAB-23 (DM)<br>POP-1 (Sox)<br>REF-2 (C2H2 ZF)<br>TBX-38 (T-box)<br>TBX-43 (T-box)<br>ZTF-27 (C2H2 ZF)<br>ZTF-3 (C2H2 ZF) | MAB-23 OLAP 4 2F1F (EM:3.18)<br>POP-1 OLAP 5 2F1F (EM:2.89)<br>REF-2 OLAP 4 2F1F (EM:8.02)<br>TBX-38 OLAP 5 2F1F (EM:5.77)<br>TBX-43 OLAP 5 2F1F (EM:5.17)<br>ZTF-27 OLAP 3 1F2F (EM:5.96)<br>ZTF-3 OLAP 5 1F2F (EM:6.91) |                                                                                           |
|  | F23F12.9 (bZIP) | NHR-154 (NHR)<br>Y75B8A.6 (CxxC)                                                                                         | NHR-154 GAP 2 2F1F (EM:4.64)<br>Y75B8A.6 GAP 7 1F2F (EM:4.58)                                                                                                                                                             |                                                                                           |
|  | F23F12.9 (bZIP) | SCRT-1 (C2H2 ZF)                                                                                                         | SCRT-1 GAP 10 2F1F (EM:3.11)                                                                                                                                                                                              |                                                                                           |
|  | LSY-2 (C2H2 ZF) | CEH-52 (Homeodomain)<br>NHR-232 (NHR)<br>TBX-38 (T-box)                                                                  | CEH-52 OLAP 4 1F2F (L1:3)<br>NHR-232 OLAP 5 1R2F (EM:2.44)<br>TBX-38 OLAP 4 2F1F (L4:5.13)<br>TBX-38 OLAP 4 2F1F (EM:5.98)<br>TBX-38 OLAP 4 2F1F (L2:5.87)<br>TBX-38 OLAP 4 2F1F (L1:5.32)                                |                                                                                           |
|  | LSY-2 (C2H2 ZF) | R07H5.10 (bZIP)<br>SCRT-1 (C2H2 ZF)                                                                                      | R07H5.10 GAP 4 1R2F (L2:3.81)<br>R07H5.10 GAP 4 1R2F (L4:4.17)<br>R07H5.10 GAP 4 1R2F (L1:4.49)<br>R07H5.10 GAP 4 1R2F (EM:3.81)<br>SCRT-1 GAP 2 1R2F (EM:2.81)                                                           | Heterotrimeric binding site that includes a NHR binding site inbetween LSY-2 and R07H5.10 |
|  | LSY-2 (C2H2 ZF) | SCRT-1 (C2H2 ZF)                                                                                                         | SCRT-1 OLAP 1 1F2F (EM:2.79)                                                                                                                                                                                              |                                                                                           |
