# Supplementary material for: Mapping and analysis of Caenorhabditis elegans transcription factor sequence specificities
Source: eLife. 2015 Apr 23;4:e06967. doi: 10.7554/eLife.06967 (PMC4434323; doi:10.7554/eLife.06967)
Supplement: Supplementary file 1. — Comparison of CisBP TF collection with wTF2.0. Includes comments of overlaps and differences between two lists and whether each entry is likely a bona fide TF. DOI: http://dx.doi.org/10.7554/eLife.06967.032 [file elife06967s007.xlsx]

## Sheet: wTF2 TFs missing from Cis-BP
Sequence name	Public name	DNA binding domain	Is it a TF? (Yes/No/Maybe)	Literature override	Category	Comments
F38A6.3	hif-1	bHLH	Yes	Yes - No strong DNA Binding evidence,but ortholog of the mammalian hypoxia-induced factor HIF-1 and binds other bHLH proteins (doi:10.1073/pnas.141234698)	Below CisBP threshold	Pfam does not identify as bHLH, SMART identifies as bHLH
T01C1.3	T01C1.3	HTH	Yes	No	Dead gene - In Cis-BP as mbr-1	Dead gene merged with T01C1.2
Y16B4A.1	unc-3	IPT/TIG	Yes	Yes - EMSA (doi:10.1016/j.ydbio.2005.07.024)	Below CisBP threshold	pfam and SMART identify IPT, SMART indentifies HLH, homology to su(H) and olf-1
F52B5.5	cep-1	p53	Yes	Yes - binds canonical p53 half-sites (PMID:15242600)	Below CisBP threshold	pfam and SMART do not identify as p53
C09H6.1	spr-4	ZF - C2H2 - 14 fingers	Yes	Yes - No direct DNA binding assays but does regulate transcription of specific genes and shares homology with Human REST (doi: 10.1242/dev.00429)	Missing from CisBP	Pfam and SMART identify as C2H2
R10E4.11	R10E4.11	ZF - C2H2 - 2 fingers	Yes	No	Missing from CisBP	Pfam and SMART identify as C2H2
T03F6.2	dnj-17	ZF - C2H2 - 2 fingers	Yes	No	Missing from CisBP	Pfam and SMART identify as C2H2
C16A3.4	C16A3.4	ZF - C2H2 - 3 fingers	Yes	No	Missing from CisBP	Pfam and SMART identify as C2H2
F26A10.2	F26A10.2	ZF - C2H2 - 3 fingers	Yes	No	Missing from CisBP	Pfam and SMART identify as C2H2
ZK546.5	ZK546.5	ZF - C2H2 - 3 fingers	Yes	No	Missing from CisBP	Pfam and SMART identify as C2H2
C46E10.9	C46E10.9	ZF - C2H2 - 4 fingers	Yes	No	Missing from CisBP	Pfam and SMART identify as C2H2
C28G1.4	C28G1.4	ZF - C2H2 - 5 fingers	Yes	No	Missing from CisBP	Pfam and SMART identify as C2H2
C26E6.2	flh-2	ZF - FLYWCH	Yes	Yes (doi:10.1101/gad.1678808)	Domain not in CisBP	Pfam and SMART identify as FLYWCH
T14F9.4	peb-1	ZF - FLYWCH	Yes	Yes (PMID:11203704)	Domain not in CisBP	Pfam and SMART identify as FLYWCH
Y11D7A.12	flh-1	ZF - FLYWCH	Yes	Yes (doi:10.1101/gad.1678808)	Domain not in CisBP	Pfam and SMART identify as FLYWCH
Y11D7A.13	flh-3	ZF - FLYWCH	Yes	Yes (doi:10.1101/gad.1678808)	Domain not in CisBP	Pfam and SMART identify as FLYWCH
F59E11.10	nhr-195	ZF - NHR	Yes	No	Above Cis-BP NHR threshold	Cis-BP, pfam and SMART identify NHR domain (zf-C4)
T27B7.5	nhr-227	ZF - NHR	Yes	No	Above Cis-BP NHR threshold	Cis-BP, pfam and SMART identify NHR domain (zf-C4)
Y116A8C.18	nhr-229	ZF - NHR	Yes	No	Above Cis-BP NHR threshold	Cis-BP, pfam and SMART identify NHR domain (zf-C4)
B0019.2	B0019.2	AT Hook	No	No	Low domain HMM score on CisBP, SMART, and Pfam	Not identified in pfam and SMART as AT-hook
C27B7.4	rad-26	AT Hook	No	No	Low domain HMM score on CisBP, SMART, and Pfam	Not identified in pfam and SMART as AT-hook
C34F6.9	C34F6.9	AT Hook	No	No	Low domain HMM score on CisBP, SMART, and Pfam	Not identified in pfam and SMART as AT-hook
F16B12.6	F16B12.6	AT Hook	No	No	Low domain HMM score on CisBP, SMART, and Pfam	Not identified in pfam and SMART as AT-hook
F26H11.2	nurf-1	AT Hook	No	No	Low domain HMM score on CisBP, SMART, and Pfam	Not identified in pfam and SMART as AT-hook
T10D4.6	T10D4.6	AT Hook	No	No	Low domain HMM score on CisBP, SMART, and Pfam	Not identified in pfam and SMART as AT-hook
T11A5.1	T11A5.1	AT Hook	No	No	Dead gene	Gene no longer present and entry removed in wormbase
T12D8.1	set-16	AT Hook	No	No	Low domain HMM score on CisBP, SMART, and Pfam	Not identified in pfam and SMART as AT-hook
Y39E4B.2	snpc-1.2	AT Hook	No	No	Low domain HMM score on CisBP, SMART, and Pfam	Not identified in pfam and SMART as AT-hook
F15E6.1	set-9	AT Hook x1	No	No	Low domain HMM score on CisBP, SMART, and Pfam	Not identified in pfam and SMART as AT-hook
F13C5.2	F13C5.2	AT Hook x3	No	No	Low domain HMM score on CisBP, SMART, and Pfam	Not identified in pfam and SMART as AT-hook
W03D2.1	pqn-75	AT Hook x3	No	No	Low domain HMM score on CisBP, SMART, and Pfam	Not identified in pfam and SMART as AT-hook
C48E7.3	lpd-2	bZIP	No	No	Low domain HMM score on CisBP, SMART, and Pfam	Not identified in pfam and SMART as bZIP
F17C11.1	F17C11.1	bZIP	No	No	Low domain HMM score on CisBP, SMART, and Pfam	Not identified in pfam and SMART as bZIP
F45H11.4	mgl-2	bZIP	No	No	Low domain HMM score on CisBP, SMART, and Pfam	Not identified in pfam and SMART as bZIP
W02H5.7	sknr-1	bZIP	No	No	Low domain HMM score on CisBP, SMART, and Pfam	Not identified in pfam and SMART as bZIP, pfam identifies as bZIP-Maf
Y75B8A.29	zip-12	bZIP	No	No	Below CisBP threshold	Not identified in pfam and SMART as bZIP, pfam identifies as bZIP-Maf
C02F12.5	C02F12.5	HD	No	No	Low domain HMM score on CisBP, SMART, and Pfam	Identified as Kunitz_BPTI in both pfam and SMART, not as HD
F57G4.6	F57G4.6	MADF	No	No	Dead gene	Transposon
F26H9.2	F26H9.2	RPEL - 2 domains	No	No	Domain not in CisBP	Not a sequence specific DBD
Y51H4A.19	Y51H4A.19	STAT	No	No	Dead gene	Pseudogene
C30G4.7	C30G4.7	TSC-22/dip/bun	No	No	Dead gene	Dead gene
T18D3.7	T18D3.7	TSC-22/dip/bun	No	No	Domain not in CisBP	TSC-22/dip/bun domain not considered by Cis-BP
Y48C3A.12	Y48C3A.12	TSC-22/dip/bun	No	No	Domain not in CisBP	TSC-22/dip/bun domain not considered by Cis-BP
C35C5.1	sdc-2	UNKNOWN	No	No	Domain not in CisBP	Condensin complex member
Y65B4BR.5	icd-2	UNKNOWN	No	No	Domain not in CisBP	No DBDs identified by Cis-BP, SMART or pfam
F57A8.1	F57A8.1	WH	No	No	Domain not in CisBP	No DBDs identified by Cis-BP, SMART or pfam
T28D9.9	T28D9.9	WH	No	No	Domain not in CisBP	No DBDs identified by Cis-BP, SMART or pfam
Y73B3A.5	elk-2	WH	No	No	Domain not in CisBP	No DBDs identified by Cis-BP, SMART or pfam
B0412.1	dac-1	WH - DAC	No	No - Most likely a non-specific DNA binding transcriptional corepressor like other Daschund family members	Domain not in CisBP	DAC domain not present
C34B4.2	C34B4.2	WH - Fork Head	No	No	Dead gene	ncRNA
ZK643.8	grl-25	WT1 - 2 domains	No	No	Domain not in CisBP	No DBDs identified by Cis-BP, SMART or pfam
C17E4.6	C17E4.6	YL1 TF	No	No	Domain not in CisBP	No DBDs identified by Cis-BP, SMART or pfam
F22D6.2	F22D6.2	ZF - A20	No	No	Domain not in CisBP	No DBDs identified by Cis-BP, SMART or pfam
Y39A1A.5	rabx-5	ZF - A20	No	No	Domain not in CisBP	No DBDs identified by Cis-BP, SMART or pfam
Y105C5A.15	Y105C5A.15	ZF - BED	No	No	Dead gene	ncRNA
ZK673.4	ZK673.4	ZF - BED	No	No	Below CisBP threshold	Pfam and SMART do not identify as ZF-BED
C04F5.5	srab-2	ZF - C2H2 - 1 finger	No	No	Low domain HMM score on CisBP, SMART, and Pfam	not identified in pfam and SMART as C2H2
C28H8.9	C28H8.9	ZF - C2H2 - 1 finger	No	No	Low domain HMM score on CisBP, SMART, and Pfam	not identified in pfam and SMART as C2H2
F23A7.6	F23A7.6	ZF - C2H2 - 1 finger	No	No	Pseudogene	Pseudogene
F40G9.14	F40G9.14	ZF - C2H2 - 1 finger	No	No	Low domain HMM score on CisBP, SMART, and Pfam	Not identified in pfam and SMART as C2H2
F44D12.10	F44D12.10	ZF - C2H2 - 1 finger	No	No	Low domain HMM score on CisBP, SMART, and Pfam	Not identified in pfam and SMART as C2H2
F45C12.1	F45C12.1	ZF - C2H2 - 1 finger	No	No	Low domain HMM score on CisBP, SMART, and Pfam	Not identified in pfam and SMART as C2H2
F49E8.2	F49E8.2	ZF - C2H2 - 1 finger	No	No	Low domain HMM score on CisBP, SMART, and Pfam	Not identified in pfam and SMART as C2H2
F53B7.2	F53B7.2	ZF - C2H2 - 1 finger	No	No	Low domain HMM score on CisBP, SMART, and Pfam	Not identified in pfam and SMART as C2H2
F55B11.4	F55B11.4	ZF - C2H2 - 1 finger	No	No	Low domain HMM score on CisBP, SMART, and Pfam	Not identified in pfam and SMART as C2H2
K11H3.4	K11H3.4	ZF - C2H2 - 1 finger	No	No	Low domain HMM score on CisBP, SMART, and Pfam	Not identified in pfam and SMART as C2H2
T07G12.13	T07G12.13	ZF - C2H2 - 1 finger	No	No	Dead gene	Gene no longer present and entry removed in wormbase
Y47G6A.7	Y47G6A.7	ZF - C2H2 - 1 finger	No	No	Low domain HMM score on CisBP, SMART, and Pfam	Not identified in pfam and SMART as C2H2
Y48A6C.1	Y48A6C.1	ZF - C2H2 - 1 finger	No	No	Pseudogene	Pseudogene
Y87G2A.3	atg-4.1	ZF - C2H2 - 1 finger	No	No	Low domain HMM score on CisBP, SMART, and Pfam	Not identified in pfam and SMART as C2H2
ZK652.6	ZK652.6	ZF - C2H2 - 1 finger	No	No	Low domain HMM score on CisBP, SMART, and Pfam	Not identified in pfam and SMART as C2H2
C08G9.2	C08G9.2	ZF - C2H2 - 2 fingers	No	No	Low domain HMM score on CisBP, SMART, and Pfam	Not identified in pfam and SMART as C2H2
W03F9.2	W03F9.2	ZF - C2H2 - 2 fingers	No	No	Low domain HMM score on CisBP, SMART, and Pfam	Not identified in pfam and SMART as C2H2
Y48G8AL.9	Y48G8AL.9	ZF - C2H2 - 2 fingers	No	No	Dead gene	Gene no longer present and entry removed in wormbase
Y95B8A.7	Y95B8A.7	ZF - C2H2 - 2 fingers	No	No	Dead gene	Gene no longer present and entry removed in wormbase
B0250.4	B0250.4	ZF - C2H2 - 6 fingers	No	No	Pseudogene	Pseudogene
B0336.3	B0336.3	ZF - CCCH	No	No	Domain mainly has other activity	Most likely RNA-binding protein
C33H5.17	C33H5.17	ZF - CCCH	No	No	Domain mainly has other activity	Most likely RNA-binding protein
K01G5.1	rnf-113	ZF - CCCH	No	No	Domain mainly has other activity	Most likely RNA-binding protein
T11G6.8	T11G6.8	ZF - CCCH	No	No	Domain mainly has other activity	Most likely RNA-binding protein
W05B10.2	ccch-3	ZF - CCCH	No	No	Domain mainly has other activity	Most likely RNA-binding protein
W05H7.4	zfp-3	ZF - CCCH	No	No	Domain mainly has other activity	Most likely RNA-binding protein
Y60A9.2	Y60A9.2	ZF - CCCH	No	No	Dead gene	Pseudogene
Y116A8C.35	uaf-2	ZF - CCCH	No	No	Domain mainly has other activity	Most likely RNA-binding protein
C09G9.6	oma-1	ZF - CCCH - 2 domains	No	No	Domain mainly has other activity	Most likely RNA-binding protein
C34D10.2	C34D10.2	ZF - CCCH - 2 domains	No	No	Domain mainly has other activity	Most likely RNA-binding protein
C35D6.4	C35D6.4	ZF - CCCH - 2 domains	No	No	Domain mainly has other activity	Most likely RNA-binding protein
F27D4.4	F27D4.4	ZF - CCCH - 2 domains	No	No	Domain mainly has other activity	Most likely RNA-binding protein
F32A11.6	moe-3	ZF - CCCH - 2 domains	No	No	Domain mainly has other activity	Most likely RNA-binding protein
F38B7.1	ccch-1	ZF - CCCH - 2 domains	No	No	Domain mainly has other activity	Most likely RNA-binding protein
F38C2.5	ccch-2	ZF - CCCH - 2 domains	No	No	Domain mainly has other activity	Most likely RNA-binding protein
F38C2.7	F38C2.7	ZF - CCCH - 2 domains	No	No	Domain mainly has other activity	Most likely RNA-binding protein
F52E1.1	pos-1	ZF - CCCH - 2 domains	No	No	Domain mainly has other activity	Most likely RNA-binding protein
K02H8.1	mbl-1	ZF - CCCH - 2 domains	No	No	Domain mainly has other activity	Most likely RNA-binding protein
T02E1.3	gla-3	ZF - CCCH - 2 domains	No	No	Domain mainly has other activity	Most likely RNA-binding protein
T26A8.4	T26A8.4	ZF - CCCH - 2 domains	No	No	Domain mainly has other activity	Most likely RNA-binding protein
W02A2.7	mex-5	ZF - CCCH - 2 domains	No	No	Domain mainly has other activity	Most likely RNA-binding protein
W03C9.7	mex-1	ZF - CCCH - 2 domains	No	No	Domain mainly has other activity	Most likely RNA-binding protein
Y116A8C.17	dct-13	ZF - CCCH - 2 domains	No	No	Domain mainly has other activity	Most likely RNA-binding protein
Y116A8C.19	Y116A8C.19	ZF - CCCH - 2 domains	No	No	Domain mainly has other activity	Most likely RNA-binding protein
Y116A8C.20	Y116A8C.20	ZF - CCCH - 2 domains	No	No	Domain mainly has other activity	Most likely RNA-binding protein
Y49E10.14	pie-1	ZF - CCCH - 2 domains	No	Transcriptional repressor - not by DNA-binding - (doi:10.1101/gad.876201)	Domain mainly has other activity	Most likely RNA-binding protein
Y53G8AR.9	Y53G8AR.9	ZF - CCCH - 2 domains	No	No	Domain mainly has other activity	Most likely RNA-binding protein
Y57G11C.25	ccch-5	ZF - CCCH - 2 domains	No	No	Domain mainly has other activity	Most likely RNA-binding protein
Y60A9.3	Y60A9.3	ZF - CCCH - 2 domains	No	No	Domain mainly has other activity	Most likely RNA-binding protein
ZC513.6	oma-2	ZF - CCCH - 2 domains	No	No	Domain mainly has other activity	Most likely RNA-binding protein
Y55F3AM.6	Y55F3AM.6	ZF - CCCH - 3 domains	No	No	Domain mainly has other activity	Most likely RNA-binding protein
AC3.10	spe-10	ZF - DHHC	No	No	Domain mainly has other activity	Domain thought to have palmitoyl transferase activity
C17D12.1	dhhc-7	ZF - DHHC	No	No	Domain mainly has other activity	Domain thought to have palmitoyl transferase activity
C43H6.7	dhhc-2	ZF - DHHC	No	No	Domain mainly has other activity	Domain thought to have palmitoyl transferase activity
D2021.2	tag-233	ZF - DHHC	No	No	Dead gene	Merged with dhhc-14
F09B12.2	dhhc-1	ZF - DHHC	No	No	Domain mainly has other activity	Domain thought to have palmitoyl transferase activity
F33D11.12	dhhc-3	ZF - DHHC	No	No	Domain mainly has other activity	Domain thought to have palmitoyl transferase activity
F59C6.2	dhhc-12	ZF - DHHC	No	No	Domain mainly has other activity	Domain thought to have palmitoyl transferase activity
H32C10.3	dhhc-13	ZF - DHHC	No	No	Domain mainly has other activity	Domain thought to have palmitoyl transferase activity
K02G10.1	dhhc-10	ZF - DHHC	No	No	Domain mainly has other activity	Domain thought to have palmitoyl transferase activity
M18.8	dhhc-6	ZF - DHHC	No	No	Domain mainly has other activity	Domain thought to have palmitoyl transferase activity
R13F6.5	dhhc-5	ZF - DHHC	No	No	Domain mainly has other activity	Domain thought to have palmitoyl transferase activity
T22E7.2	dhhc-11	ZF - DHHC	No	No	Domain mainly has other activity	Domain thought to have palmitoyl transferase activity
Y39E4B.7	dhhc-8	ZF - DHHC	No	No	Domain mainly has other activity	Domain thought to have palmitoyl transferase activity
Y47H9C.2	dhhc-2	ZF - DHHC	No	No	Domain mainly has other activity	Domain thought to have palmitoyl transferase activity
ZK757.4	dhhc-4	ZF - DHHC	No	No	Domain mainly has other activity	Domain thought to have palmitoyl transferase activity
R13.1	R13.1	ZF - MIZ	No	No	Dead gene	Merged with miz-1
W10D5.3	gei-17	ZF - MIZ	No	No	Domain not in CisBP	Pfam and SMART identify as zf-MIZ
ZK1067.2	ZK1067.2	ZF - NF-X1 - 2 domains	No	No	Domain not in CisBP	No DBDs identified by Cis-BP, SMART or pfam
F55D12.3	nhr-191	ZF - NHR	No	No	Dead gene	Pseudogene
T05C3.1	nhr-279	ZF - NHR	No	No	Dead gene	Merged with nhr-47 (present in Cis-BP)
T26E4.11	srw-49	ZF - NHR	No	No	Dead gene	Pseudogene
Y41D4B.26	Y41D4B.26	ZF - NHR	No	No	Low domain HMM score on CisBP, SMART, and Pfam	Pfam and SMART do not identify NHR domain (zf-C4)
ZK1037.4	nhr-246	ZF - NHR	No	No	Below CisBP threshold	Pfam and SMART do not identify NHR domain (zf-C4)
C05D10.1	C05D10.1	AT Hook	Maybe	No	Below CisBP threshold	Pfam does not identify as AT-hook, SMART identifies as AT-hook with very high E-value
H20J04.2	H20J04.2	AT Hook	Maybe	No	Below CisBP threshold	Pfam does not identify as AT-hook, SMART identifies as AT-hook with very high E-value
T04G9.1	T04G9.1	AT Hook	Maybe	No	Below CisBP threshold	Pfam does not identify as AT-hook, SMART identifies as AT-hook with very high E-value
T23G5.6	saeg-2	AT Hook	Maybe	No	Below CisBP threshold	Pfam does not identify as AT-hook, SMART identifies as AT-hook with very high E-value
C05D2.5	xnd-1	AT Hook x2	Maybe	No	Below CisBP threshold	Pfam does not identify as AT-hook, SMART identifies as AT-hook with very high E-value
C38D4.3	mel-28	AT Hook x2	Maybe	No	Below CisBP threshold	Pfam does not identify as AT-hook, SMART identifies as AT-hook with very high E-value
Y18D10A.1	Y18D10A.1	AT Hook x2	Maybe	No	Below CisBP threshold	Pfam does not identify as AT-hook, SMART identifies as AT-hook with very high E-value
F09G2.9	F09G2.9	AT Hook x3	Maybe	Maybe - Only cited in conference abstracts	Below CisBP threshold	Pfam does not identify as AT-hook, SMART identifies as AT-hook with very high E-value
T05A7.4	hmg-11	AT Hook x3	Maybe	No	Below CisBP threshold	Pfam identifies as AT-hook with very high E-value, SMART does not
T01D3.2	hlh-34	bHLH	Maybe	Maybe - bHLH,PAS proteins may need PTMs or ligands to bind sequence, HLH-34 forms heterodimers with other bHLH proteins (PMID:19632181)	Below CisBP threshold	Pfam does not identify as bHLH, SMART identifies as bHLH
Y75B8A.35	zip-1	bZIP	Maybe	Maybe - Only cited in conference abstracts	Below CisBP threshold	Not identified in pfam and SMART as bZIP
F23B12.7	F23B12.7	CBF	Maybe	No	Below CisBP threshold	Pfam and SMART identifies as CBF
F23F1.1	nfyc-1	CBF	Maybe	Maybe - Unclear whether only nfya-1 engages in sequence specific binding (doi:10.1016/j.ydbio.2007.05.021)	Below CisBP threshold	Pfam identifies as CBF but not SMART
F40F9.7	drap-1	CBF	Maybe	No	Below CisBP threshold	Pfam identifies as CBF but not SMART
F53A2.5	dro-1	CBF	Maybe	No	Below CisBP threshold	Pfam identifies as CBF but not SMART
T26A5.8	T26A5.8	CBF	Maybe	No	Below CisBP threshold	Pfam identifies as CBF but not SMART
W10D9.4	nfyb-1	CBF	Maybe	Maybe - Unclear whether only nfya-1 engages in sequence specific binding (doi:10.1016/j.ydbio.2007.05.021)	Below CisBP threshold	Pfam identifies as CBF but not SMART
Y53F4B.3	Y53F4B.3	CBF	Maybe	No	Below CisBP threshold	Pfam identifies as CBF but not SMART
F45C12.2	ceh-82	HD	Maybe	No	Below CisBP threshold	Pfam does not identify as HD, SMART identifies as HD, probably should be in our database
H21P03.1	mbf-1	HTH	Maybe	No	Below CisBP threshold	Pfam and SMART identify as HTH
B0261.1	B0261.1	MYB	Maybe	No	Below CisBP threshold	Pfam does not identify as SANT, SMART identifies as SANT
F10E7.11	F10E7.11	MYB	Maybe	No	Below CisBP threshold	Pfam does not identify as SANT, SMART identifies as SANT with very high E-value
R151.8	R151.8	MYB	Maybe	No	Below CisBP threshold	Pfam does not identify as SANT, SMART identifies as SANT
T07F8.4	T07F8.4	MYB	Maybe	No	Below CisBP threshold	Pfam does not identify as SANT, SMART identifies as SANT
Y105E8A.17	ekl-4	MYB	Maybe	No	Below CisBP threshold	Pfam does not identify as SANT, SMART identifies as SANT
B0336.1	wrm-1	UNKNOWN	Maybe	Yes - but not sequence specific	Domain not in CisBP	B-catenin like - not sequence specific
C54D1.6	bar-1	UNKNOWN	Maybe	Yes - but not sequence specific	Domain not in CisBP	Co-activator, B-catenin like - not sequence specific
K05C4.6	hmp-2	UNKNOWN	Maybe	Yes - but not sequence specific	Domain not in CisBP	Co-activator, B-catenin like - not sequence specific
F53B2.6	ham-1	WH	Maybe	Weak evidence - regulates differentiation, and thought to be an asymetrically localizing TF - Mainly from conference abstracts	Below CisBP threshold	WH (Storkhead) domain identified by SMART and pfam
K09A11.1	K09A11.1	ZF - BED	Maybe	No	Below CisBP threshold	Pfam and SMART identify as zf-bed
Y39B6A.12	bed-1	ZF - BED	Maybe	No	Below CisBP threshold	Pfam and SMART identify as zf-bed
Y47D3B.9	bed-2	ZF - BED	Maybe	No	Below CisBP threshold	Pfam and SMART identify as zf-bed
2L52.1	2L52.1	ZF - C2H2 - 1 finger	Maybe	No	Below CisBP threshold	Pfam does not identify as C2H2, SMART identifies as C2H2 with a very high E-value
C01F6.9	C01F6.9	ZF - C2H2 - 1 finger	Maybe	No	Below CisBP threshold	Pfam does not identify as C2H2, SMART identifies as C2H2 with a very high E-value
C02F5.12	C02F5.12	ZF - C2H2 - 1 finger	Maybe	No	Below CisBP threshold	Pfam does not identify as C2H2, SMART identifies as C2H2 with a very high E-value
C06E2.1	C06E2.1	ZF - C2H2 - 1 finger	Maybe	No	Below CisBP threshold	Pfam does not identify as C2H2, SMART identifies as C2H2 with a very high E-value
C37A2.5	pqn-21	ZF - C2H2 - 1 finger	Maybe	No	Below CisBP threshold	Pfam does not identify as C2H2, SMART identifies as C2H2 with a very high E-value
C38D4.7	C38D4.7	ZF - C2H2 - 1 finger	Maybe	No	Below CisBP threshold	Pfam does not identify as C2H2, SMART identifies as C2H2 with a very high E-value
C52E12.1	C52E12.1	ZF - C2H2 - 1 finger	Maybe	No	Below CisBP threshold	Pfam does not identify as C2H2, SMART identifies as C2H2 with a very high E-value
D1046.2	D1046.2	ZF - C2H2 - 1 finger	Maybe	No	Below CisBP threshold	Pfam does not identify as C2H2, SMART identifies as C2H2 with a very high E-value
D2030.7	D2030.7	ZF - C2H2 - 1 finger	Maybe	No	Below CisBP threshold	Pfam does not identify as C2H2, SMART identifies as C2H2 with a very high E-value
F11A10.2	F11A10.2	ZF - C2H2 - 1 finger	Maybe	No	Below CisBP threshold	Pfam does not identify as C2H2, SMART identifies as C2H2 with a very high E-value
F18A1.2	lin-26	ZF - C2H2 - 1 finger	Maybe	Maybe - regulates differentiation but no evidence of DNA binding	Below CisBP threshold	Pfam does not identify as C2H2, SMART identifies as C2H2 with a very high E-value
F18A1.3	lir-1	ZF - C2H2 - 1 finger	Maybe	Yes (May have ZF, but is not as canonical C2H2, found in Y1H assays, Walhout in prep)	Below CisBP threshold	Pfam does not identify as C2H2, SMART identifies as C2H2 with a very high E-value
F18A1.4	lir-2	ZF - C2H2 - 1 finger	Maybe	Maybe - regulates differentiation but no evidence of DNA binding	Below CisBP threshold	Pfam does not identify as C2H2, SMART identifies as C2H2 with a very high E-value
F21G4.5	F21G4.5	ZF - C2H2 - 1 finger	Maybe	No	Below CisBP threshold	Pfam does not identify as C2H2, SMART identifies as C2H2 with a very high E-value
F23C8.4	ubxn-1	ZF - C2H2 - 1 finger	Maybe	No	Below CisBP threshold	Pfam does not identify as C2H2, SMART identifies as C2H2 with a very high E-value
F27D4.6	F27D4.6	ZF - C2H2 - 1 finger	Maybe	No	Below CisBP threshold	Pfam and SMART identify as C2H2
F37B4.10	F37B4.10	ZF - C2H2 - 1 finger	Maybe	No	Below CisBP threshold	Pfam does not identify as C2H2, SMART identifies as C2H2 with a very high E-value
F37H8.1	lir-3	ZF - C2H2 - 1 finger	Maybe	No	Below CisBP threshold	Pfam does not identify as C2H2, SMART identifies as C2H2 with a very high E-value
K05F1.5	K05F1.5	ZF - C2H2 - 1 finger	Maybe	No	Below CisBP threshold	Pfam does not identify as C2H2, SMART identifies as C2H2 with a very high E-value
K10D2.3	cid-1	ZF - C2H2 - 1 finger	Maybe	No	Below CisBP threshold	Pfam does not identify as C2H2, SMART identifies as C2H2 with a very high E-value
K10G6.3	sea-2	ZF - C2H2 - 1 finger	Maybe	No	Below CisBP threshold	Pfam does not identify as C2H2, SMART identifies as C2H2 with a very high E-value
K12H6.12	K12H6.12	ZF - C2H2 - 1 finger	Maybe	No	Below CisBP threshold	Pfam does not identify as C2H2, SMART identifies as C2H2 with a very high E-value
M04G12.4	somi-1	ZF - C2H2 - 1 finger	Maybe	Maybe - No direct DNA binding assays but does repress transcription of miRNA (doi:10.1101/gad.17153811)	Below CisBP threshold	Pfam and SMART identify as C2H2
R02D3.7	R02D3.7	ZF - C2H2 - 1 finger	Maybe	No	Below CisBP threshold	Pfam does not identify as C2H2, SMART identifies as C2H2 with a very high E-value
R05D3.3	R05D3.3	ZF - C2H2 - 1 finger	Maybe	No	Below CisBP threshold	Pfam does not identify as C2H2, SMART identifies as C2H2 with a very high E-value
T06G6.5	T06G6.5	ZF - C2H2 - 1 finger	Maybe	No	Below CisBP threshold	Pfam does not identify as C2H2, SMART identifies as C2H2 with a very high E-value
T07G12.10	zim-2	ZF - C2H2 - 1 finger	Maybe	No	Below CisBP threshold	Pfam does not identify as C2H2, SMART identifies as C2H2 with a very high E-value
T07G12.11	zim-3	ZF - C2H2 - 1 finger	Maybe	No	Below CisBP threshold	Pfam does not identify as C2H2, SMART identifies as C2H2 with a very high E-value
T07G12.12	him-8	ZF - C2H2 - 1 finger	Maybe	No	Below CisBP threshold	Pfam does not identify as C2H2, SMART identifies as C2H2 with a very high E-value
T08G5.7	T08G5.7	ZF - C2H2 - 1 finger	Maybe	No	Below CisBP threshold	Pfam and SMART identify as C2H2
T10B11.3	ztf-4	ZF - C2H2 - 1 finger	Maybe	No	Below CisBP threshold	Pfam does not identify as C2H2, SMART identifies as C2H2 with a very high E-value
T10G3.5	eea-1	ZF - C2H2 - 1 finger	Maybe	No	Below CisBP threshold	Pfam does not identify as C2H2, SMART identifies as C2H2 with a very high E-value
T23F11.4	T23F11.4	ZF - C2H2 - 1 finger	Maybe	No	Below CisBP threshold	Pfam does not identify as C2H2, SMART identifies as C2H2 with a very high E-value
T23G4.1	tlp-1	ZF - C2H2 - 1 finger	Maybe	Yes (No ZF by eye but found by yeast one-hybrid assays ,Walhout in prep)	Below CisBP threshold	Pfam does not identify as C2H2, SMART identifies as C2H2 with a very high E-value
T24C4.7	ztf-18	ZF - C2H2 - 1 finger	Maybe	No	Below CisBP threshold	Pfam does not identify as C2H2, SMART identifies as C2H2 with a very high E-value
W04B5.2	W04B5.2	ZF - C2H2 - 1 finger	Maybe	No	Below CisBP threshold	Pfam does not identify as C2H2, SMART identifies as C2H2 with a very high E-value
W04D2.4	W04D2.4	ZF - C2H2 - 1 finger	Maybe	No	Below CisBP threshold	Pfam does not identify as C2H2, SMART identifies as C2H2 with a very high E-value
Y37F4.6	Y37F4.6	ZF - C2H2 - 1 finger	Maybe	No	Below CisBP threshold	Pfam does not identify as C2H2, SMART identifies as C2H2 with a very high E-value
Y42H9AR.3	rabs-5,ztf-5	ZF - C2H2 - 1 finger	Maybe	No	Below CisBP threshold	Pfam does not identify as C2H2, SMART identifies as C2H2 with a very high E-value
Y48A6C.3	ztf-21	ZF - C2H2 - 1 finger	Maybe	No	Below CisBP threshold	Pfam does not identify as C2H2, SMART identifies as C2H2 with a very high E-value
Y48C3A.4	ztf-22	ZF - C2H2 - 1 finger	Maybe	No	Below CisBP threshold	Pfam does not identify as C2H2, SMART identifies as C2H2 with a very high E-value
Y48E1B.7	Y48E1B.7	ZF - C2H2 - 1 finger	Maybe	No	Below CisBP threshold	Pfam does not identify as C2H2, SMART identifies as C2H2 with a very high E-value
Y51H1A.6	mcd-1	ZF - C2H2 - 1 finger	Maybe	No	Below CisBP threshold	Pfam does not identify as C2H2, SMART identifies as C2H2 with a very high E-value
Y52B11A.9	Y52B11A.9	ZF - C2H2 - 1 finger	Maybe	No	Below CisBP threshold	Pfam does not identify as C2H2, SMART identifies as C2H2 with a very high E-value
Y53F4B.5	Y53F4B.5	ZF - C2H2 - 1 finger	Maybe	No	Below CisBP threshold	Pfam does not identify as C2H2, SMART identifies as C2H2 with a very high E-value
Y54G2A.20	Y54G2A.20	ZF - C2H2 - 1 finger	Maybe	No	Below CisBP threshold	Pfam does not identify as C2H2, SMART identifies as C2H2 with a very high E-value
Y56A3A.18	Y56A3A.18	ZF - C2H2 - 1 finger	Maybe	No	Below CisBP threshold	Pfam and SMART identify as C2H2
Y57A10A.31	Y57A10A.31	ZF - C2H2 - 1 finger	Maybe	No	Below CisBP threshold	Pfam does not identify as C2H2, SMART identifies as C2H2 with a very high E-value
Y82E9BR.17	Y82E9BR.17	ZF - C2H2 - 1 finger	Maybe	No	Below CisBP threshold	Pfam does not identify as C2H2, SMART identifies as C2H2 with a very high E-value
ZK177.3	ZK177.3	ZF - C2H2 - 1 finger	Maybe	No	Below CisBP threshold	Pfam does not identify as C2H2, SMART identifies as C2H2 with a very high E-value
ZK185.1	ZK185.1	ZF - C2H2 - 1 finger	Maybe	No	Below CisBP threshold	Pfam does not identify as C2H2, SMART identifies as C2H2 with a very high E-value
ZK686.4	ZK686.4	ZF - C2H2 - 1 finger	Maybe	No	Below CisBP threshold	Pfam and SMART identiy as C2H2
F33H1.4	F33H1.4	ZF - C2H2 - 1 finger, AT Hook x3	Maybe	No	Below CisBP threshold	Pfam does not identify as C2H2, SMART identifies as C2H2 with a very high E-value
K04C1.3	K04C1.3	ZF - C2H2 - 1 finger, WH - Fork Head	Maybe	No	Below CisBP threshold	Pfam does not identify as C2H2, SMART identifies as C2H2 with a very high E-value
C03B8.4	lin-13	ZF - C2H2 - 15 fingers	Maybe	No	Below CisBP threshold	Pfam does not identify as C2H2, SMART identifies as C2H2 with a very high E-value
B0035.1	B0035.1	ZF - C2H2 - 2 fingers	Maybe	No	Below CisBP threshold	Pfam does not identify as C2H2, SMART identifies as C2H2 with a very high E-value
F21A9.2	F21A9.2	ZF - C2H2 - 2 fingers	Maybe	No	Below CisBP threshold	Pfam does not identify as C2H2, SMART identifies as C2H2 with a very high E-value
F44E2.7	F44E2.7	ZF - C2H2 - 2 fingers	Maybe	No	Below CisBP threshold	Pfam does not identify as C2H2, SMART identifies as C2H2 with a very high E-value
F52E4.8	ztf-13	ZF - C2H2 - 2 fingers	Maybe	No	Below CisBP threshold	Pfam does not identify as C2H2, SMART identifies as C2H2 with a very high E-value
K09H9.7	K09H9.7	ZF - C2H2 - 2 fingers	Maybe	No	Below CisBP threshold	Pfam does not identify as C2H2, SMART identifies as C2H2 with a very high E-value
K10B3.5	K10B3.5	ZF - C2H2 - 2 fingers	Maybe	No	Below CisBP threshold	Pfam does not identify as C2H2, SMART identifies as C2H2 with a very high E-value
R144.3	R144.3	ZF - C2H2 - 2 fingers	Maybe	No	Below CisBP threshold	Pfam does not identify as C2H2, SMART identifies as C2H2 with a very high E-value
T09A5.12	ztf-17	ZF - C2H2 - 2 fingers	Maybe	No	Below CisBP threshold	Pfam does not identify as C2H2, SMART identifies as C2H2 with a very high E-value
T20H4.2	T20H4.2	ZF - C2H2 - 2 fingers	Maybe	No	Below CisBP threshold	Pfam does not identify as C2H2, SMART identifies as C2H2 with a very high E-value
Y17G7B.22	Y17G7B.22	ZF - C2H2 - 2 fingers	Maybe	No	Below CisBP threshold	Pfam does not identify as C2H2, SMART identifies as C2H2 with a very high E-value
Y22D7AL.16	Y22D7AL.16	ZF - C2H2 - 2 fingers	Maybe	No	Below CisBP threshold	Pfam does not identify as C2H2, SMART identifies as C2H2 with a very high E-value
Y71A12B.8	Y71A12B.8	ZF - C2H2 - 2 fingers	Maybe	No	Below CisBP threshold	Pfam does not identify as C2H2, SMART identifies as C2H2 with a very high E-value
Y82E9BR.1	Y82E9BR.1	ZF - C2H2 - 2 fingers	Maybe	No	Below CisBP threshold	Pfam does not identify as C2H2, SMART identifies as C2H2 with a very high E-value
ZK892.7	sdz-38	ZF - C2H2 - 2 fingers	Maybe	No	Below CisBP threshold	Pfam does not identify as C2H2, SMART identifies as C2H2 with a very high E-value
F40F8.7	pqm-1	ZF - C2H2 - 3 fingers	Maybe	No	Below CisBP threshold	Pfam does not identify as C2H2, SMART identifies as C2H2 with a very high E-value
Y67H2A.10	Y67H2A.10	ZF - C2H2 - 3 fingers	Maybe	No	Below CisBP threshold	Pfam does not identify as C2H2, SMART identifies as C2H2 with a very high E-value
Y73F8A.33	Y73F8A.33	ZF - C2H2 - 3 fingers	Maybe	No	Below CisBP threshold	Pfam does not identify as C2H2, SMART identifies as C2H2 with a very high E-value
Y79H2A.3	Y79H2A.3	ZF - C2H2 - 3 fingers	Maybe	No	Below CisBP threshold	Pfam does not identify as C2H2, SMART identifies as C2H2 with a very high E-value
ZC395.8	ztf-8	ZF - C2H2 - 3 fingers	Maybe	No	Below CisBP threshold	Pfam does not identify as C2H2, SMART identifies as C2H2 with a very high E-value
F54C4.3	F54C4.3	ZF - C2H2 - 3 fingers, AT Hook	Maybe	No	Below CisBP threshold	Pfam does not identify as C2H2, SMART identifies as C2H2 with a very high E-value
F54F2.5	ztf-1	ZF - C2H2 - 4 fingers	Maybe	No	Below CisBP threshold	Pfam does not identify as C2H2, SMART identifies as C2H2 with a very high E-value
H16D19.3	H16D19.3	ZF - C2H2 - 4 fingers	Maybe	No	Below CisBP threshold	Pfam does not identify as C2H2, SMART identifies as C2H2 with a very high E-value
T07D10.3	T07D10.3	ZF - C2H2 - 4 fingers	Maybe	No	Below CisBP threshold	Pfam does not identify as C2H2, SMART identifies as C2H2 with a very high E-value
F37D6.2	F37D6.2	ZF - C2H2 - 5 fingers	Maybe	No	Below CisBP threshold	Pfam does not identify as C2H2, SMART identifies as C2H2 with a very high E-value
M04B2.1	mep-1	ZF - C2H2 - 5 fingers	Maybe	No	Below CisBP threshold	Pfam does not identify as C2H2, SMART identifies as C2H2 with a very high E-value
C01B7.1	ztf-12	ZF - C2H2 - 6 fingers	Maybe	No	Below CisBP threshold	Pfam does not identify as C2H2, SMART identifies as C2H2 with a very high E-value
F53B3.1	tra-4	ZF - C2H2 - 6 fingers	Maybe	No	Below CisBP threshold	Pfam does not identify as C2H2, SMART identifies as C2H2 with a very high E-value
C07A12.5	spr-3	ZF - C2H2 - 7 fingers	Maybe	No	Below CisBP threshold	Pfam does not identify as C2H2, SMART identifies as C2H2 with a very high E-value

## Sheet: Cis-BP TFs missing from wTF2
Sequence name	Public name	DNA binding domain	Evidence
Y44A6D.3	Y44A6D.3	Brinker	Experimental Evidence
Y61A9LA.9	Y61A9LA.9	bZIP	Experimental Evidence
egrh-3	Y94H6A.11	C2H2 ZF	Experimental Evidence
F55C5.11	F55C5.11	C2H2 ZF	Experimental Evidence
ztf-9	ZK287.6	C2H2 ZF	Experimental Evidence
Y48G1C.6	Y48G1C.6	CENPB	Experimental Evidence
Y75B8A.6	Y75B8A.6	CxxC	Experimental Evidence
nsy-7	C18F3.4	Homeodomain	Experimental Evidence
mbr-1	T01C1.2	Pipsqueak	Experimental Evidence
tbx-43	Y46E12A.4	T-box	Experimental Evidence
dpy-27	R13G10.1	Unknown	Experimental Evidence
lin-14	T25C12.1	Unknown	Experimental Evidence
tbp-1	T20B12.2	TBP	Predicted CisBP
C46C2.7	C46C2.7	AP-2	Above CisBP threshold
Y108G3AL.7	Y108G3AL.7	ARID/BRIGHT	Above CisBP threshold
ZK177.11	ZK177.11	bHLH	Above CisBP threshold
F21D5.4	F21D5.4	Brinker	Above CisBP threshold
W02H5.4	W02H5.4	Brinker	Above CisBP threshold
C18C4.5	C18C4.5	bZIP	Above CisBP threshold
C32E8.1	C32E8.1	bZIP	Above CisBP threshold
F15A4.10	F15A4.10	bZIP	Above CisBP threshold
F17C11.17	F17C11.17	bZIP	Above CisBP threshold
F41H10.4	F41H10.4	bZIP	Above CisBP threshold
F45H11.6	F45H11.6	bZIP	Above CisBP threshold
lmn-1	DY3.2	bZIP	Above CisBP threshold
Y60A3A.25	Y60A3A.25	bZIP	Above CisBP threshold
C27A2.7	C27A2.7	C2H2 ZF	Above CisBP threshold
D2092.10	D2092.10	C2H2 ZF	Above CisBP threshold
egrh-2	Y55F3AM.7	C2H2 ZF	Above CisBP threshold
lin-54	JC8.6	CxC	Above CisBP threshold
C02F12.10	C02F12.10	Homeodomain	Above CisBP threshold
C50B6.1	C50B6.1	Homeodomain	Above CisBP threshold
T21B4.17	T21B4.17	Homeodomain	Above CisBP threshold
Y66D12A.5	Y66D12A.5	Homeodomain	Above CisBP threshold
C05D2.6	C05D2.6	MADF	Above CisBP threshold
C06A6.2	C06A6.2	MADF	Above CisBP threshold
C54G6.1	C54G6.1	MADF	Above CisBP threshold
madf-1	Y55F3BR.5	MADF	Above CisBP threshold
flt-1	ZK783.4	MBD	Above CisBP threshold
met-2	R05D3.11	MBD	Above CisBP threshold
C50F4.12	C50F4.12	mTERF	Above CisBP threshold
K11D2.5	K11D2.5	mTERF	Above CisBP threshold
nhr-146	Y41D4B.27	Nuclear receptor	Above CisBP threshold
nhr-236	Y38F2AL.5	Nuclear receptor	Above CisBP threshold
nhr-286	VC5.6	Nuclear receptor	Above CisBP threshold
set-23	Y41D4B.12	Nuclear receptor	Above CisBP threshold
ZK1037.13	ZK1037.13	Nuclear receptor	Above CisBP threshold
rps-13	C16A3.9	Paired box	Above CisBP threshold
ZC247.1	ZC247.1	Pipsqueak	Above CisBP threshold
F19F10.9	F19F10.9	SART-1	Above CisBP threshold
Y73E7A.1	Y73E7A.1	Sox	Above CisBP threshold
F59D6.7	F59D6.7	STAT	Above CisBP threshold
tlf-1	F39H11.2	TBP	Above CisBP threshold
him-17	T09E8.2	THAP finger	Above CisBP threshold
Y50E8A.12	Y50E8A.12	THAP finger	Above CisBP threshold

## Sheet: Legend
TF Status	Description
Yes	TF Should be included in Cis-BP but currently is not
Maybe	TF is likely be sequence specific based on literature and/or at least one of PFAM and SMART identifies a TF domain including those with high E-values (false-positives likely)
No	TF should not be included in Cis-BP because it is either: (1) A pseudogene; (2) low match of Pfam, SMART and/or CiSBP domain score; (3) lacks literature support; (4) non-sequence specific DBD
