# Supplementary material for: Mapping and analysis of Caenorhabditis elegans transcription factor sequence specificities
Source: eLife. 2015 Apr 23;4:e06967. doi: 10.7554/eLife.06967 (PMC4434323; doi:10.7554/eLife.06967)
Supplement: Supplementary file 2. — C. elegans curated motif collection. This spreadsheet contains the curated motif IDs for each C. elegans TF along with their source and experimental support. DOI: http://dx.doi.org/10.7554/eLife.06967.033 [file elife06967s008.xls]

## Sheet: Curated C. elegans Motifs
Gene Name	Transcription Factor	Sequence Name	DBD Family	Curated Motif(s)	Curated Motif(s) Source	Best PBM Motif	Best Non-PBM Motif	Best dimeric or alternate binding mode motif	Direct or Inferred?	Y1H Enrichment	ChIP-seq Enrichment
cfi-1	CFI-1	T23D8.8	ARID/BRIGHT	M0114_1.02	PBM	M0114_1.02			Experimental
hmg-12	HMG-12	Y17G7A.1	AT hook	M0141_1.02	PBM	M0141_1.02			Experimental
Y116A8C.22	Y116A8C.22	Y116A8C.22	AT hook	M0140_1.02	PBM	M0140_1.02			Experimental
bed-3	BED-3	F25H8.6	BED ZF	M0148_1.02	PBM	M0148_1.02			Experimental
aha-1	AHA-1	C25A1.11	bHLH	M0220_1.02	PBM	M0179_1.02, M0220_1.02	M2956_1.02		Predicted
cnd-1	CND-1	C34E10.7	bHLH	M6358_1.02	HocoMoco	M0217_1.02	M6358_1.02		Predicted
hlh-1	HLH-1	B0304.1	bHLH	M0168_1.02	PBM	M0168_1.02	M2338_1.02		Experimental
hlh-10	HLH-10	ZK682.4	bHLH	M0249_1.02	PBM	M0249_1.02			Experimental
hlh-11	HLH-11	F58A4.7	bHLH	M0228_1.02	PBM	M0228_1.02	M4899_1.02		Experimental
hlh-12	HLH-12	C28C12.8	bHLH	M0172_1.02	PBM	M0172_1.02			Experimental
hlh-13	HLH-13	F48D6.3	bHLH	M4966_1.02	B1H		M4966_1.02		Predicted
hlh-15	HLH-15	C43H6.8	bHLH	M5671_1.02	SELEX	M0216_1.02	M5671_1.02		Predicted
hlh-16	HLH-16	DY3.3	bHLH	M0173_1.02	PBM	M0173_1.02			Experimental
hlh-17	HLH-17	F38C2.2	bHLH	M0194_1.02	PBM	M0194_1.02	M5308_1.02		Predicted
hlh-25	HLH-25	C17C3.7	bHLH	M0170_1.02	PBM	M0170_1.02			Experimental
hlh-26	HLH-26	C17C3.8	bHLH	M0171_1.02	PBM	M0171_1.02			Experimental
hlh-27	HLH-27	C17C3.10	bHLH	M0169_1.02	PBM	M0169_1.02			Experimental
hlh-28	HLH-28	F31A3.2	bHLH	M0226_1.02	PBM	M0226_1.02			Predicted
hlh-29	HLH-29	F31A3.4	bHLH	M0226_1.02	PBM	M0226_1.02			Experimental
hlh-30	HLH-30	W02C12.3	bHLH	M0240_1.02	PBM	M0240_1.02			Experimental
hlh-8	HLH-8	C02B8.4	bHLH	M0177_1.02	PBM	M0177_1.02	M5257_1.02		Predicted
lin-32	LIN-32	T14F9.5	bHLH	M0224_1.02	PBM	M0224_1.02	M5989_1.02		Predicted
mdl-1	MDL-1	R03E9.1	bHLH	M4709_1.02	ChIP-seq		M4709_1.02		Experimental
mxl-3	MXL-3	F46G10.6	bHLH	M0227_1.02	PBM	M0227_1.02	M4919_1.02		Experimental
ref-1	REF-1	T01E8.2	bHLH	M0239_1.02	PBM	M0239_1.02			Experimental
Y44A6D.3	Y44A6D.3	Y44A6D.3	Brinker	M0254_1.02	PBM	M0254_1.02			Experimental
atf-2	ATF-2	K08F8.2	bZIP	M0326_1.02	PBM	M0326_1.02			Experimental
atf-5	ATF-5	T04C10.4	bZIP	M0342_1.02	PBM	M0342_1.02			Experimental
atf-6	ATF-6	F45E6.2	bZIP	M0325_1.02	PBM	M0325_1.02			Experimental
atf-7	ATF-7	C07G2.2	bZIP	M0275_1.02	PBM	M0275_1.02			Experimental
C27D6.4	C27D6.4	C27D6.4	bZIP	M0276_1.02	PBM	M0276_1.02	M4897_1.02		Experimental
ces-2	CES-2	ZK909.4	bZIP	M0358_1.02	PBM	M0358_1.02			Experimental
crh-1	CRH-1	Y41C4A.4	bZIP	M3086_1.02	Transfac		M3086_1.02		Predicted
D1005.3	D1005.3	D1005.3	bZIP	M0281_1.02	PBM	M0281_1.02			Experimental
F17A9.3	F17A9.3	F17A9.3	bZIP	M0323_1.02	PBM	M0323_1.02			Experimental
F23F12.9	F23F12.9	F23F12.9	bZIP	M0324_1.02	PBM	M0324_1.02			Experimental
jun-1	JUN-1	T24H10.7	bZIP	M0344_1.02	PBM	M0344_1.02			Experimental
R07H5.10	R07H5.10	R07H5.10	bZIP	M0339_1.02	PBM	M0339_1.02			Experimental
skn-1	SKN-1	T19E7.2	bZIP	M0343_1.02	PBM	M0343_1.02	M2596_1.02, M2340_1.02		Experimental
T27F2.4	T27F2.4	T27F2.4	bZIP	M0345_1.02	PBM	M0345_1.02			Experimental
W08E12.1	W08E12.1	W08E12.1	bZIP	M0347_1.02	PBM	M0347_1.02			Experimental
xbp-1	XBP-1	R74.3	bZIP	M0340_1.02	PBM	M0340_1.02			Experimental
Y51H4A.4	Y51H4A.4	Y51H4A.4	bZIP	M0349_1.02	PBM	M0349_1.02			Experimental
Y61A9LA.9	Y61A9LA.9	Y61A9LA.9	bZIP	M0350_1.02	PBM	M0350_1.02			Experimental
zip-3	ZIP-3	W07G1.3	bZIP	M0346_1.02	PBM	M0346_1.02			Experimental
B0310.2	B0310.2	B0310.2	C2H2 ZF	M0379_1.02	PBM	M0379_1.02			Experimental
blmp-1	BLMP-1	F25D7.3	C2H2 ZF	M4768_1.02	B1H		M4768_1.02		Experimental
C46E10.8	C46E10.8	C46E10.8	C2H2 ZF	M0385_1.02	PBM	M0385_1.02			Experimental
ces-1	CES-1	F43G9.11	C2H2 ZF	M0450_1.02	PBM	M0450_1.02	M5184_1.02		Experimental
che-1	CHE-1	C55B7.12	C2H2 ZF	M0388_1.02	PBM	M0388_1.02	M2066_1.02		Experimental
die-1	DIE-1	C18D1.1	C2H2 ZF	M0382_1.02	PBM	M0382_1.02			Experimental
egl-43	EGL-43	R53.3	C2H2 ZF	M0489_1.02	PBM	M0489_1.02			Experimental
egrh-1	EGRH-1	C27C12.2	C2H2 ZF	M0383_1.02	PBM	M0383_1.02			Experimental
egrh-3	EGRH-3	Y94H6A.11	C2H2 ZF	M0499_1.02	PBM	M0499_1.02			Experimental
eor-1	EOR-1	R11E3.6	C2H2 ZF	M0488_1.02	PBM	M0488_1.02			Experimental
F10B5.3	F10B5.3	F10B5.3	C2H2 ZF	M0445_1.02	PBM	M0445_1.02			Experimental
F13H6.1	F13H6.1	F13H6.1	C2H2 ZF	M0447_1.02	PBM	M0447_1.02			Experimental
F52B5.7	F52B5.7	F52B5.7	C2H2 ZF	M0454_1.02	PBM	M0454_1.02			Experimental
F55C5.11	F55C5.11	F55C5.11	C2H2 ZF	M0457_1.02	PBM	M0457_1.02			Experimental
ham-2	HAM-2	C07A12.1	C2H2 ZF	M0380_1.02	PBM	M0380_1.02			Experimental
K02D7.2	K02D7.2	K02D7.2	C2H2 ZF	M0458_1.02	PBM	M0458_1.02			Experimental
K11D2.4	K11D2.4	K11D2.4	C2H2 ZF	M0459_1.02	PBM	M0459_1.02			Experimental
klf-1	KLF-1	F56F11.3	C2H2 ZF	M6127_1.02	ChIP-seq	M0405_1.02	M6127_1.02		Predicted
klf-2	KLF-2	F53F8.1	C2H2 ZF	M0443_1.02	PBM	M0443_1.02	M6127_1.02		Predicted
klf-3	KLF-3	F54H5.4	C2H2 ZF	M0456_1.02	PBM	M0456_1.02			Experimental
lin-29	LIN-29	W03C9.4	C2H2 ZF	M0493_1.02	PBM	M0493_1.02			Experimental
lin-48	LIN-48	F34D10.5	C2H2 ZF	M0448_1.02	PBM	M0448_1.02			Experimental
lsl-1	LSL-1	F52F12.4	C2H2 ZF	M0455_1.02	PBM	M0455_1.02			Experimental
lsy-2	LSY-2	F49H12.1	C2H2 ZF	M0453_1.02	PBM	M0453_1.02			Experimental
lsy-27	LSY-27	F47H4.1	C2H2 ZF	M0452_1.02	PBM	M0452_1.02			Experimental
M03D4.4	M03D4.4	M03D4.4	C2H2 ZF	M0460_1.02	PBM	M0460_1.02			Experimental
mnm-2	MNM-2	C10A4.8	C2H2 ZF	M0381_1.02	PBM	M0381_1.02			Experimental
odd-1	ODD-1	B0280.4	C2H2 ZF	M0384_1.02	PBM	M0384_1.02			Predicted
odd-2	ODD-2	C34H3.2	C2H2 ZF	M0384_1.02	PBM	M0384_1.02			Experimental
pag-3	PAG-3	F45B8.4	C2H2 ZF	M0451_1.02	PBM	M0451_1.02			Experimental
ref-2	REF-2	C47C12.3	C2H2 ZF	M0386_1.02	PBM	M0386_1.02			Experimental
scrt-1	SCRT-1	C55C2.1	C2H2 ZF	M0389_1.02	PBM	M0389_1.02			Experimental
slr-2	SLR-2	Y59A8B.13	C2H2 ZF	M0497_1.02	PBM	M0497_1.02			Experimental
sptf-3	SPTF-3	Y40B1A.4	C2H2 ZF	M0495_1.02	PBM	M0495_1.02			Experimental
syd-9	SYD-9	ZK867.1	C2H2 ZF	M0547_1.02	PBM	M0547_1.02			Experimental
T22C8.4	T22C8.4	T22C8.4	C2H2 ZF	M0491_1.02	PBM	M0491_1.02			Experimental
tra-1	TRA-1	Y47D3A.6	C2H2 ZF	M2599_1.02	Transfac		M2599_1.02		Experimental
Y38H8A.5	Y38H8A.5	Y38H8A.5	C2H2 ZF	M4840_1.02, M4841_1.02	B1H		M4840_1.02, M4841_1.02		Predicted
Y53H1A.2	Y53H1A.2	Y53H1A.2	C2H2 ZF	M0496_1.02	PBM	M0496_1.02			Experimental
ZC328.2	ZC328.2	ZC328.2	C2H2 ZF	M0544_1.02	PBM	M0544_1.02			Experimental
ZK337.2	ZK337.2	ZK337.2	C2H2 ZF	M0546_1.02	PBM	M0546_1.02			Experimental
ztf-14	ZTF-14	M163.2	C2H2 ZF	M0461_1.02	PBM	M0461_1.02			Experimental
ztf-16	ZTF-16	R08E3.4	C2H2 ZF	M0487_1.02	PBM	M0487_1.02			Experimental
ztf-19	ZTF-19	T27B1.2	C2H2 ZF	M0492_1.02	PBM	M0492_1.02			Experimental
ztf-2	ZTF-2	F13G3.1	C2H2 ZF	M0446_1.02	PBM	M0446_1.02			Experimental
ztf-25	ZTF-25	Y6G8.3	C2H2 ZF	M0452_1.02	PBM	M0452_1.02			Predicted
ztf-27	ZTF-27	T09F3.1	C2H2 ZF	M0490_1.02	PBM	M0490_1.02			Experimental
ztf-28	ZTF-28	F36F12.8	C2H2 ZF	M0449_1.02	PBM	M0449_1.02			Experimental
ztf-29	ZTF-29	Y66D12A.12	C2H2 ZF	M0498_1.02	PBM	M0498_1.02			Experimental
ztf-3	ZTF-3	C53D5.4	C2H2 ZF	M0387_1.02	PBM	M0387_1.02			Experimental
ztf-30	ZTF-30	C06E1.8	C2H2 ZF	M0380_1.02	PBM	M0380_1.02			Predicted
ztf-6	ZTF-6	W06H12.1	C2H2 ZF	M0494_1.02	PBM	M0494_1.02			Experimental
ztf-9	ZTF-9	ZK287.6	C2H2 ZF	M0545_1.02	PBM	M0545_1.02			Experimental
ztf-11	ZTF-11	F52F12.6	C2HC ZF	M0574_1.02	PBM	M0574_1.02			Experimental
mex-6	MEX-6	AH6.5	CCCH ZF	M0575_1.02	PBM	M0575_1.02			Experimental
Y48G1C.6	Y48G1C.6	Y48G1C.6	CENPB	M0579_1.02	PBM	M0579_1.02			Experimental
cey-1	CEY-1	F33A8.3	CSD	M0584_1.02	PBM	M0584_1.02			Experimental
ceh-48	CEH-48	C17H12.9	CUT,Homeodomain	M0586_1.02	PBM	M0586_1.02	M5696_1.02		Experimental
Y75B8A.6	Y75B8A.6	Y75B8A.6	CxxC	M0616_1.02	PBM	M0616_1.02			Experimental
C34D1.1	C34D1.1	C34D1.1	DM	M0624_1.02	PBM	M0624_1.02, M0620_1.02			Experimental
dmd-3	DMD-3	Y43F8C.10	DM	M0643_1.02	PBM	M0643_1.02			Experimental
dmd-4	DMD-4	C27C12.6	DM	M0622_1.02	PBM	M0622_1.02			Experimental
dmd-5	DMD-5	F10C1.5	DM	M0639_1.02	PBM	M0639_1.02			Experimental
dmd-6	DMD-6	F13G11.1	DM	M0640_1.02	PBM	M0640_1.02			Experimental
mab-23	MAB-23	C32C4.5	DM	M0623_1.02	PBM	M0623_1.02			Experimental
mab-3	MAB-3	Y53C12B.5	DM	M0644_1.02	PBM	M0644_1.02	M2068_1.02		Experimental
T22H9.4	T22H9.4	T22H9.4	DM	M0642_1.02	PBM	M0642_1.02			Experimental
Y67D8A.3	Y67D8A.3	Y67D8A.3	DM	M0645_1.02	PBM	M0645_1.02			Experimental
efl-1	EFL-1	Y102A5C.18	E2F	M2334_1.02	ChIP-seq		M4711_1.02		Experimental
efl-2	EFL-2	Y48C3A.17	E2F	M0675_1.02	PBM	M0675_1.02			Experimental
ast-1	AST-1	T08H4.3	Ets	M0709_1.02	PBM	M0709_1.02, M0695_1.02			Predicted
C24A1.2	C24A1.2	C24A1.2	Ets	M5377_1.02	SELEX	M0708_1.02	M5377_1.02		Predicted
ets-4	ETS-4	F22A3.1	Ets	M0701_1.02	PBM	M0701_1.02	M5861_1.02		Predicted
ets-5	ETS-5	C42D8.4	Ets	M0699_1.02	PBM	M0699_1.02	M4951_1.02		Predicted
F19F10.1	F19F10.1	F19F10.1	Ets	M0712_1.02	PBM	M0712_1.02			Experimental
F19F10.5	F19F10.5	F19F10.5	Ets	M0712_1.02	PBM	M0712_1.02			Predicted
lin-1	LIN-1	C37F5.1	Ets	M0703_1.02	PBM	M0703_1.02			Predicted
tag-97	TAG-97	C33A11.4	Ets	M0697_1.02	PBM	M0697_1.02	M3180_1.02		Predicted
daf-16	DAF-16	R13H8.1	Forkhead	M0748_1.02	PBM	M0748_1.02	M6245_1.02		Experimental
fkh-10	FKH-10	C25A1.2	Forkhead	M3255_1.02	Transfac	M0726_1.02	M3255_1.02		Predicted
fkh-2	FKH-2	T14G12.4	Forkhead	M0715_1.02	PBM	M0715_1.02			Predicted
fkh-6	FKH-6	B0286.5	Forkhead	M0734_1.02	PBM	M0734_1.02			Predicted
fkh-7	FKH-7	F26D12.1	Forkhead	M0717_1.02	PBM	M0717_1.02			Predicted
fkh-9	FKH-9	K03C7.2	Forkhead	M0741_1.02	PBM	M0741_1.02			Experimental
let-381	LET-381	F26B1.7	Forkhead	M0739_1.02	PBM	M0739_1.02			Experimental
lin-31	LIN-31	K10G6.1	Forkhead	M0742_1.02	PBM	M0742_1.02			Experimental
pha-4	PHA-4	F38A6.1	Forkhead	M0737_1.02	PBM	M0737_1.02	M4664_1.02, M5438_1.02		Experimental
unc-130	UNC-130	C47G2.2	Forkhead	M0723_1.02	PBM	M0723_1.02	M2438_1.02		Predicted
egl-18	EGL-18	F55A8.1	GATA	M0786_1.02	PBM	M0786_1.02			Predicted
elt-1	ELT-1	W09C2.1	GATA	M0785_1.02, M4713_1.02	PBM & ChIP-seq	M0785_1.02		M4713_1.02	Experimental & Predicted
elt-3	ELT-3	K02B9.4	GATA	M2335_1.02	ChIP-seq		M2335_1.02		Experimental
elt-6	ELT-6	F52C12.5	GATA	M0786_1.02	PBM	M0786_1.02			Experimental
elt-7	ELT-7	C18G1.2	GATA	M0772_1.02	PBM	M0772_1.02			Experimental
end-1	END-1	F58E10.2	GATA	M0787_1.02	PBM	M0787_1.02			Experimental
end-3	END-3	F58E10.5	GATA	M0788_1.02	PBM	M0788_1.02			Experimental
med-1	MED-1	T24D3.1	GATA	M0789_1.02	PBM	M0789_1.02			Predicted
med-2	MED-2	K04C2.6	GATA	M0789_1.02	PBM	M0789_1.02			Experimental
egl-27	EGL-27	C04A2.3	GATA,Myb/SANT	M4715_1.02	ChIP-seq		M4715_1.02		Experimental
alr-1	ALR-1	R08B4.2	Homeodomain	M4733_1.02, M5311_1.02	B1H & SELEX		M4733_1.02, M5311_1.02		Predicted
C07E3.6	C07E3.6	C07E3.6	Homeodomain	M0857_1.02	PBM	M0857_1.02			Experimental
ceh-1	CEH-1	F16H11.4	Homeodomain	M5197_1.02	B1H		M5197_1.02		Predicted
ceh-10	CEH-10	W03A3.1	Homeodomain	M5951_1.02, M5287_1.02	SELEX		M5951_1.02	M5287_1.02	Predicted
ceh-12	CEH-12	F33D11.4	Homeodomain	M2032_1.02	B1H		M2032_1.02		Predicted
ceh-13	CEH-13	R13A5.5	Homeodomain	M1164_1.02	PBM	M1164_1.02	M1164_1.02		Predicted
ceh-14	CEH-14	F46C8.5	Homeodomain	M0963_1.02	PBM	M0963_1.02	M6329_1.02		Predicted
ceh-16	CEH-16	C13G5.1	Homeodomain	M5046_1.02	B1H		M5046_1.02		Predicted
ceh-17	CEH-17	D1007.1	Homeodomain	M5137_1.02, M5714_1.02	SELEX	M1000_1.02	M5137_1.02	M5714_1.02	Predicted
ceh-19	CEH-19	F20D12.6	Homeodomain	M1085_1.02	PBM	M1085_1.02			Experimental
ceh-2	CEH-2	C27A12.5	Homeodomain	M0892_1.02	PBM	M0892_1.02	M4932_1.02, M5388_1.02		Predicted
ceh-20	CEH-20	F31E3.1	Homeodomain	M1082_1.02, M6412_1.02	PBM & HocoMoco	M1082_1.02	M6412_1.02		Predicted
ceh-22	CEH-22	F29F11.5	Homeodomain	M1086_1.02	PBM	M1086_1.02	M4076_1.02		Experimental
ceh-23	CEH-23	ZK652.5	Homeodomain	M1144_1.02	PBM	M1144_1.02			Experimental
ceh-24	CEH-24	F55B12.1	Homeodomain	M1087_1.02	PBM	M1087_1.02, M1086_1.02			Experimental
ceh-28	CEH-28	K03A11.3	Homeodomain	M4717_1.02	ChIP-seq	M1029_1.02	M4717_1.02, M2054_1.02		Experimental
ceh-30	CEH-30	C33D12.7	Homeodomain	M0961_1.02	PBM	M0961_1.02	M5298_1.02		Predicted
ceh-31	CEH-31	C33D12.1	Homeodomain	M0961_1.02	PBM	M0961_1.02	M5298_1.02		Predicted
ceh-32	CEH-32	W05E10.3	Homeodomain	M0938_1.02	PBM	M0938_1.02	M5136_1.02		Predicted
ceh-33	CEH-33	C10G8.7	Homeodomain	M1049_1.02	PBM	M1049_1.02			Predicted
ceh-34	CEH-34	C10G8.6	Homeodomain	M0859_1.02	PBM	M0859_1.02			Experimental
ceh-36	CEH-36	C37E2.4	Homeodomain	M0862_1.02	PBM	M0862_1.02			Experimental
ceh-37	CEH-37	C37E2.5	Homeodomain	M0863_1.02	PBM	M0863_1.02	M6182_1.02		Experimental
ceh-40	CEH-40	F17A2.5	Homeodomain	M1898_1.02	SELEX	M1050_1.02	M1898_1.02		Predicted
ceh-43	CEH-43	C28A5.4	Homeodomain	M5340_1.02	SELEX	M0950_1.02	M5340_1.02		Predicted
ceh-45	CEH-45	ZK993.1	Homeodomain	M1096_1.02	PBM	M1096_1.02	M4990_1.02		Predicted
ceh-5	CEH-5	C16C2.1	Homeodomain	M0860_1.02	PBM	M0860_1.02			Experimental
ceh-51	CEH-51	Y80D3A.3	Homeodomain	M1128_1.02	PBM	M1128_1.02			Experimental
ceh-52	CEH-52	C07E3.5	Homeodomain	M0856_1.02	PBM	M0856_1.02			Experimental
ceh-53	CEH-53	C09G12.1	Homeodomain	M0858_1.02	PBM	M0858_1.02			Experimental
ceh-8	CEH-8	ZK265.4	Homeodomain	M1020_1.02	PBM	M1020_1.02	M4999_1.02, M5754_1.02		Predicted
ceh-9	CEH-9	Y65B4BR.9	Homeodomain	M5117_1.02	B1H		M5117_1.02		Predicted
ceh-90	CEH-90	R03E1.4	Homeodomain	M1118_1.02	PBM	M1118_1.02			Experimental
cog-1	COG-1	R03C1.3	Homeodomain	M1163_1.02	PBM	M1163_1.02	M5008_1.02		Predicted
dsc-1	DSC-1	C18B12.3	Homeodomain	M0870_1.02	PBM	M0870_1.02			Predicted
egl-5	EGL-5	C08C3.1	Homeodomain	M0869_1.02	PBM	M0869_1.02			Predicted
irx-1	IRX-1	C36F7.1	Homeodomain	M0871_1.02	PBM	M0871_1.02	M5582_1.02		Predicted
lim-4	LIM-4	ZC64.4	Homeodomain	M1143_1.02	PBM	M1143_1.02	M4756_1.02		Experimental
lim-6	LIM-6	K03E6.1	Homeodomain	M0960_1.02	PBM	M0960_1.02			Predicted
lim-7	LIM-7	C04F1.3	Homeodomain	M5253_1.02	B1H	M0991_1.02	M5253_1.02		Predicted
lin-11	LIN-11	ZC247.3	Homeodomain	M5075_1.02	B1H	M0963_1.02	M5075_1.02		Predicted
lin-39	LIN-39	C07H6.7	Homeodomain	M1070_1.02	PBM	M1070_1.02	M4716_1.02		Experimental
mab-5	MAB-5	C08C3.3	Homeodomain	M1027_1.02	PBM	M1027_1.02	M5259_1.02		Predicted
mec-3	MEC-3	F01D4.6	Homeodomain	M0931_1.02	PBM	M0931_1.02	M5076_1.02		Predicted
mls-2	MLS-2	C39E6.4	Homeodomain	M5520_1.02	SELEX	M1063_1.02	M5520_1.02		Predicted
nsy-7	NSY-7	C18F3.4	Homeodomain	M0861_1.02	PBM	M0861_1.02			Experimental
pal-1	PAL-1	C38D4.6	Homeodomain	M0864_1.02	PBM	M0864_1.02			Experimental
pha-2	PHA-2	M6.3	Homeodomain	M1110_1.02	PBM	M1110_1.02	M4875_1.02		Experimental
php-3	PHP-3	Y75B8A.1	Homeodomain	M1157_1.02	PBM	M1157_1.02	M5545_1.02, M6035_1.02, M6034_1.02, M5544_1.02		Predicted
R06F6.6	R06F6.6	R06F6.6	Homeodomain	M1119_1.02	PBM	M1119_1.02			Experimental
T13C5.4	T13C5.4	T13C5.4	Homeodomain	M1122_1.02	PBM	M1122_1.02			Experimental
tab-1	TAB-1	F31E8.3	Homeodomain	M1089_1.02	PBM	M1089_1.02	M5310_1.02		Predicted
ttx-1	TTX-1	Y113G7A.6	Homeodomain	M5699_1.02	SELEX	M0919_1.02	M5699_1.02		Predicted
ttx-3	TTX-3	C40H5.5	Homeodomain	M0902_1.02, M5598_1.02	PBM & SELEX	M0902_1.02		M5598_1.02	Predicted
unc-30	UNC-30	B0564.10	Homeodomain	M0941_1.02	PBM	M0941_1.02	M5718_1.02		Predicted
unc-4	UNC-4	F26C11.2	Homeodomain	M5942_1.02	SELEX	M1000_1.02	M5942_1.02		Predicted
unc-42	UNC-42	F58E6.10	Homeodomain	M4846_1.02	B1H		M4846_1.02		Predicted
unc-62	UNC-62	T28F12.2	Homeodomain	M1123_1.02	PBM	M1123_1.02			Experimental
vab-15	VAB-15	R07B1.1	Homeodomain	M4925_1.02, M6054_1.02	B1H & SELEX		M4925_1.02	M6054_1.02	Predicted
vab-7	VAB-7	M142.4	Homeodomain	M1109_1.02	PBM	M1109_1.02			Experimental
ZC123.3	ZC123.3	ZC123.3	Homeodomain	M1142_1.02	PBM	M1142_1.02			Experimental
eyg-1	EYG-1	Y53C12C.1	Homeodomain, Paired box	M1225_1.02	PBM	M1225_1.02			Experimental
vab-3	VAB-3	F14F3.1	Homeodomain, Paired box	M1223_1.02	PBM	M1223_1.02	M3727_1.02		Predicted
ceh-18	CEH-18	ZC64.3	Homeodomain, POU	M1244_1.02	PBM				Experimental
ceh-6	CEH-6	K02B12.1	Homeodomain, POU	M1226_1.02	PBM	M1226_1.02, M1230_1.02	M5733_1.02		Predicted
unc-86	UNC-86	C30A5.7	Homeodomain, POU	M1229_1.02, M5740_1.02	PBM & SELEX	M1229_1.02		M5740_1.02	Experimental & Predicted
hsf-1	HSF-1	Y53C10A.12	HSF	M1251_1.02	PBM	M1251_1.02			Experimental
C01G12.1	C01G12.1	C01G12.1	MADF	M1279_1.02	PBM	M1279_1.02			Experimental
T07C12.11	T07C12.11	T07C12.11	MADF	M1288_1.02	PBM	M1288_1.02			Experimental
ZC416.1	ZC416.1	ZC416.1	MADF	M1289_1.02	PBM	M1289_1.02			Experimental
mef-2	MEF-2	W10D5.1	MADS box	M1884_1.02	ChIP-seq		M4675_1.02		Predicted
unc-120	UNC-120	D1081.2	MADS box	M1296_1.02	PBM	M1296_1.02			Experimental
D1081.8	D1081.8	D1081.8	Myb/SANT	M2699_1.02	Transfac		M2699_1.02		Predicted
gei-11	GEI-11	F32H2.1	Myb/SANT	M2337_1.02	ChIP-seq		M2337_1.02		Experimental
daf-12	DAF-12	F11A1.3	Nuclear receptor	M1461_1.02	PBM	M1461_1.02			Experimental
fax-1	FAX-1	F56E3.4	Nuclear receptor	M1472_1.02	PBM	M1472_1.02	M5035_1.02		Predicted
nhr-1	NHR-1	R09G11.2	Nuclear receptor	M1477_1.02	PBM	M1477_1.02			Experimental
nhr-10	NHR-10	B0280.8	Nuclear receptor	M1477_1.02	PBM	M1477_1.02			Predicted
nhr-101	NHR-101	H12C20.6	Nuclear receptor	M1477_1.02	PBM	M1477_1.02			Predicted
nhr-109	NHR-109	T12C9.5	Nuclear receptor	M1486_1.02	PBM	M1486_1.02			Predicted
nhr-122	NHR-122	Y41D4B.9	Nuclear receptor	M1487_1.02	PBM	M1487_1.02			Experimental
nhr-128	NHR-128	F44C8.5	Nuclear receptor	M1428_1.02	PBM	M1428_1.02			Predicted
nhr-134	NHR-134	F44C8.2	Nuclear receptor	M1428_1.02	PBM	M1428_1.02			Predicted
nhr-136	NHR-136	C13C4.3	Nuclear receptor	M1424_1.02	PBM	M1424_1.02			Predicted
nhr-141	NHR-141	F25E5.6	Nuclear receptor	M1427_1.02	PBM	M1427_1.02			Predicted
nhr-142	NHR-142	F44E7.8	Nuclear receptor	M1466_1.02	PBM	M1466_1.02			Experimental
nhr-145	NHR-145	Y39B6A.47	Nuclear receptor	M1485_1.02	PBM	M1485_1.02			Experimental
nhr-153	NHR-153	C13C4.1	Nuclear receptor	M1424_1.02	PBM	M1424_1.02			Predicted
nhr-154	NHR-154	C13C4.2	Nuclear receptor	M1424_1.02	PBM	M1424_1.02			Experimental
nhr-168	NHR-168	C50B6.8	Nuclear receptor	M1427_1.02	PBM	M1427_1.02			Experimental
nhr-177	NHR-177	F16B4.1	Nuclear receptor	M1462_1.02	PBM	M1462_1.02			Experimental
nhr-182	NHR-182	F41B5.9	Nuclear receptor	M1463_1.02	PBM	M1463_1.02			Experimental
nhr-204	NHR-204	R02C2.4	Nuclear receptor	M1476_1.02	PBM	M1476_1.02			Experimental
nhr-216	NHR-216	T09D3.4	Nuclear receptor	M1480_1.02	PBM	M1480_1.02			Experimental
nhr-23	NHR-23	C01H6.5	Nuclear receptor	M1453_1.02	PBM	M1453_1.02	M3838_1.02		Predicted
nhr-232	NHR-232	Y22F5A.1	Nuclear receptor	M1484_1.02	PBM	M1484_1.02			Experimental
nhr-25	NHR-25	F11C1.6	Nuclear receptor	M3521_1.02	Transfac		M4719_1.02		Experimental
nhr-273	NHR-273	T12C9.1	Nuclear receptor	M1486_1.02	PBM	M1486_1.02			Predicted
nhr-28	NHR-28	C11G6.4	Nuclear receptor	M1488_1.02	PBM	M1488_1.02			Predicted
nhr-3	NHR-3	H01A20.1	Nuclear receptor	M1473_1.02	PBM	M1473_1.02			Experimental
nhr-34	NHR-34	F58G6.5	Nuclear receptor	M1468_1.02	PBM	M1468_1.02			Experimental
nhr-36	NHR-36	F07C3.10	Nuclear receptor	M1460_1.02	PBM	M1460_1.02			Experimental
nhr-41	NHR-41	Y104H12A.1	Nuclear receptor	M1491_1.02	PBM	M1491_1.02	M5036_1.02		Predicted
nhr-42	NHR-42	C33G8.6	Nuclear receptor	M1425_1.02	PBM	M1425_1.02			Experimental
nhr-46	NHR-46	C45E5.6	Nuclear receptor	M1426_1.02	PBM	M1426_1.02			Experimental
nhr-48	NHR-48	ZK662.3	Nuclear receptor	M1461_1.02	PBM	M1461_1.02			Predicted
nhr-49	NHR-49	K10C3.6	Nuclear receptor	M1474_1.02	PBM	M1474_1.02			Experimental
nhr-5	NHR-5	Y73F8A.21	Nuclear receptor	M1489_1.02	PBM	M1489_1.02			Experimental
nhr-6	NHR-6	C48D5.1	Nuclear receptor	M1450_1.02, M5685_1.02	PBM & SELEX	M1450_1.02		M5685_1.02	Predicted
nhr-60	NHR-60	F57A10.5	Nuclear receptor	M1427_1.02	PBM	M1427_1.02			Predicted
nhr-64	NHR-64	C45E1.1	Nuclear receptor	M3420_1.02	Transfac		M6284_1.02		Predicted
nhr-65	NHR-65	Y17D7A.3	Nuclear receptor	M1483_1.02	PBM	M1483_1.02			Experimental
nhr-66	NHR-66	T09A12.4	Nuclear receptor	M1479_1.02	PBM	M1479_1.02			Experimental
nhr-67	NHR-67	C08F8.8	Nuclear receptor	M5246_1.02	B1H		M5246_1.02		Predicted
nhr-7	NHR-7	F54D1.4	Nuclear receptor	M1467_1.02	PBM	M1467_1.02			Experimental
nhr-70	NHR-70	Y51A2D.17	Nuclear receptor	M1488_1.02	PBM	M1488_1.02			Experimental
nhr-79	NHR-79	T26H2.9	Nuclear receptor	M1482_1.02	PBM	M1482_1.02			Predicted
nhr-84	NHR-84	T06C12.7	Nuclear receptor	M1478_1.02	PBM	M1478_1.02			Experimental
nhr-85	NHR-85	W05B5.3	Nuclear receptor	M4937_1.02	B1H		M4937_1.02		Predicted
nhr-86	NHR-86	Y40B10A.8	Nuclear receptor	M1486_1.02	PBM	M1486_1.02			Experimental
odr-7	ODR-7	T18D3.2	Nuclear receptor	M1481_1.02	PBM	M1481_1.02			Experimental
sex-1	SEX-1	F44A6.2	Nuclear receptor	M1465_1.02	PBM	M1465_1.02	M4938_1.02		Experimental
unc-55	UNC-55	F55D12.4	Nuclear receptor	M1434_1.02	PBM	M1434_1.02, M1495_1.02, M1457_1.02	M3078_1.02		Predicted
egl-38	EGL-38	C04G2.7	Paired box	M1498_1.02	PBM	M1498_1.02	M5707_1.02		Experimental
npax-1	NPAX-1	F21D12.5	Paired box	M1500_1.02	PBM	M1500_1.02			Experimental
pax-1	PAX-1	K07C11.1	Paired box	M5158_1.02	B1H		M5158_1.02		Predicted
pax-2	PAX-2	K06B9.5	Paired box	M1501_1.02	PBM	M1501_1.02			Experimental
mbr-1	MBR-1	T01C1.2	Pipsqueak	M1511_1.02	PBM	M1511_1.02			Experimental
ceh-26	CEH-26	K12H4.1	Prospero	M1514_1.02	PBM	M1514_1.02			Experimental
daf-19	DAF-19	F33H1.1	RFX	M1534_1.02	PBM	M1534_1.02			Experimental
tag-347	TAG-347	C25G4.4	SAND	M1542_1.02	PBM	M1542_1.02			Experimental
sma-4	SMA-4	R12B2.1	SMAD	M1574_1.02	PBM	M1574_1.02			Experimental
egl-13	EGL-13	T22B7.1	Sox	M1609_1.02	PBM	M1609_1.02			Experimental
gei-3	GEI-3	T22H6.6	Sox	M1610_1.02	PBM	M1610_1.02			Experimental
pop-1	POP-1	W10C8.2	Sox	M1611_1.02	PBM	M1611_1.02			Experimental
sem-2	SEM-2	C32E12.5	Sox	M1577_1.02	PBM	M1577_1.02			Experimental
sox-3	SOX-3	F40E10.2	Sox	M3910_1.02, M6129_1.02	Transfac & ChIP-seq		M3910_1.02	M6129_1.02	Predicted
mab-9	MAB-9	T27A1.6	T-box	M1631_1.02, M5887_1.02	PBM & SELEX	M1631_1.02		M5887_1.02	Predicted
tbx-2	TBX-2	F21H11.3	T-box	M1634_1.02	PBM	M1634_1.02			Predicted
tbx-33	TBX-33	Y66A7A.8	T-box	M1636_1.02	PBM	M1636_1.02			Experimental
tbx-37	TBX-37	Y47D3A.12	T-box	M1624_1.02	PBM	M1624_1.02			Predicted
tbx-38	TBX-38	C24H11.3	T-box	M1624_1.02	PBM	M1624_1.02			Experimental
tbx-39	TBX-39	Y73F8A.16	T-box	M1637_1.02	PBM	M1637_1.02			Experimental
tbx-40	TBX-40	Y73F8A.17	T-box	M1638_1.02	PBM	M1638_1.02			Experimental
tbx-43	TBX-43	Y46E12A.4	T-box	M1635_1.02	PBM	M1635_1.02			Experimental
tbp-1	TBP-1	T20B12.2	TBP	M6502_1.02	HocoMoco	M1641_1.02	M6502_1.02		Predicted
athp-1	ATHP-1	C44B9.4	Unknown	M1672_1.02	PBM	M1672_1.02			Experimental
dpy-27	DPY-27	R13G10.1	Unknown	M2333_1.02	ChIP-seq		M2333_1.02		Experimental
lin-14	LIN-14	T25C12.1	Unknown	M2067_1.02	SELEX		M2067_1.02		Experimental
Motif Enrichment Legend
	Significant Motif Enrichment (q <0.05)
	No Motif Enrichment
	No Available Datasets
