# Supplementary material for: Mapping and analysis of Caenorhabditis elegans transcription factor sequence specificities
Source: eLife. 2015 Apr 23;4:e06967. doi: 10.7554/eLife.06967 (PMC4434323; doi:10.7554/eLife.06967)
Supplement: Supplementary file 3. — Number of experiments required for complete coverage of human, fly, and worm TF collections. This spreadsheet contains numbers of experiments needed for each DBD class to have complete coverage of the motif collection based on previously described DBD prediction thresholds. DOI: http://dx.doi.org/10.7554/eLife.06967.034 [file elife06967s009.xlsx]

## Sheet: C.elegans
Key	Total_Genes	Have_Motifs	CanInferNow	NeededPBMs	NeededPBMS_99	NeededPBMS_95	NeededPBMS_90	NeededPBMS_75	NeededPBMS_50
zf-C4	266	28	21	181	176	165	152	112	45
Homeobox	76	24	38	14	14	11	7	0	0
HLH	32	8	7	17	16	15	13	8	1
zf-C2H2,zf-C2H2,zf-C2H2	30	18	6	6	6	5	3	0	0
bZIP_1	28	16	1	11	11	10	9	4	0
zf-C2H2,zf-C2H2	28	10	0	18	18	17	16	11	4
T-box	20	4	3	10	10	9	8	5	2
zf-C2H2,zf-C2H2,zf-C2H2,zf-C2H2	19	11	0	8	8	8	7	4	0
Fork_head	16	5	5	5	5	5	4	1	0
HMG_box	14	4	1	9	9	9	8	6	2
zf-C2H2,zf-C2H2,zf-C2H2,zf-C2H2,zf-C2H2	12	5	0	7	7	7	6	4	1
GATA	11	6	2	2	2	2	1	1	0
MADF_DNA_bdg	10	3	0	7	7	7	6	5	2
Ets	10	1	7	2	2	2	1	0	0
DM	9	7	0	2	2	2	2	0	0
HLH,HLH	8	5	1	2	2	2	2	0	0
zf-C2H2,zf-C2H2,zf-C2H2,zf-C2H2,zf-C2H2,zf-C2H2	8	2	1	5	5	5	5	3	1
PAX	8	3	1	4	4	4	4	2	0
MH1	7	1	0	6	6	6	6	5	3
Homeobox,Homeobox	7	0	0	7	7	7	7	6	4
Myb_DNA-binding	6	0	0	6	6	6	6	5	3
THAP	6	0	0	6	6	6	6	5	3
zf-C4,zf-C4	6	0	0	6	6	6	6	5	3
zf-C2H2	5	1	0	4	4	4	4	3	2
CUT,Homeobox	5	1	0	3	3	3	3	2	1
TF_AP-2	5	0	0	4	4	4	4	3	2
CSD	5	1	0	3	3	3	3	2	1
SAND	4	1	0	3	3	3	3	2	1
Myb_DNA-binding,Myb_DNA-binding	4	0	1	3	3	3	3	2	1
ARID	4	1	0	3	3	3	3	2	1
DM,DM	3	2	0	1	1	1	1	1	0
zf-C2H2,zf-C2H2,zf-C2H2,zf-C2H2,zf-C2H2,zf-C2H2,zf-C2H2	3	0	0	3	3	3	3	3	2
Pou,Homeobox	3	2	1	0	0	0	0	0	0
PAX,Homeobox	3	1	1	1	1	1	1	1	0
HMG_box,HMG_box	3	0	0	3	3	3	3	3	2
BrkDBD	3	1	0	2	2	2	2	2	1
bZIP_1,bZIP_1	3	2	0	1	1	1	1	1	0
MADF_DNA_bdg,MADF_DNA_bdg	2	0	0	2	2	2	2	2	1
T-box,T-box	2	1	0	1	1	1	1	1	0
zf-C2H2,zf-C2H2,zf-C2H2,zf-C2H2,zf-C2H2,zf-C2H2,zf-C2H2,zf-C2H2	2	0	0	2	2	2	2	2	1
NDT80_PhoG	2	0	0	2	2	2	2	2	1
HTH_psq,HTH_psq	2	0	0	2	2	2	2	2	1
E2F_TDP	2	2	0	0	0	0	0	0	0
HSF_DNA-bind	2	1	0	1	1	1	1	1	0
TBP,TBP	2	0	1	1	1	1	1	1	0
CBFB_NFYA	2	0	0	2	2	2	2	2	1
STAT_bind	2	0	0	2	2	2	2	2	1
MBD	2	0	0	2	2	2	2	2	1
SRF-TF	2	1	1	0	0	0	0	0	0
Myb_DNA-binding,GATA	2	1	0	1	1	1	1	1	0
Homeobox,Homeobox,Homeobox	1	0	0	1	1	1	1	1	1
Homeobox,Homeobox,Homeobox,Homeobox,Homeobox	1	0	0	1	1	1	1	1	1
Myb_DNA-binding,Myb_DNA-binding,Myb_DNA-binding,Myb_DNA-binding	1	1	0	0	0	0	0	0	0
CP2	1	0	0	1	1	1	1	1	1
CUT,CUT,CUT,Homeobox	1	0	0	1	1	1	1	1	1
Runt	1	0	0	1	1	1	1	1	1
GATA,GATA	1	1	0	0	0	0	0	0	0
mTERF	1	0	0	1	1	1	1	1	1
RFX_DNA_binding	1	1	0	0	0	0	0	0	0
E2F_TDP,E2F_TDP	1	0	0	1	1	1	1	1	1
zf-CXXC,zf-CXXC	1	1	0	0	0	0	0	0	0
Pou	1	0	1	0	0	0	0	0	0
zf-C2H2,zf-C2H2,zf-C2H2,zf-C2H2,zf-C2H2,zf-C2H2,zf-C2H2,zf-C2H2,zf-C2H2,zf-C2H2,zf-C2H2,zf-C2H2,zf-C2H2,zf-C2H2,zf-C2H2	1	0	0	1	1	1	1	1	1
CXC,CXC	1	0	0	1	1	1	1	1	1
AT_hook,AT_hook,AT_hook,AT_hook,AT_hook,AT_hook,AT_hook,AT_hook	1	1	0	0	0	0	0	0	0
E2F_TDP,DP	1	0	0	1	1	1	1	1	1
TEA	1	0	0	1	1	1	1	1	1
AT_hook,AT_hook,AT_hook,AT_hook,AT_hook	1	1	0	0	0	0	0	0	0
LAG1-DNAbind	1	0	0	1	1	1	1	1	1
CENP-B_N	1	1	0	0	0	0	0	0	0
zf-C2H2,zf-C2H2,Homeobox,zf-C2H2,zf-C2H2,zf-C2H2	1	0	0	1	1	1	1	1	1
zf-C2HC,zf-C2HC	1	1	0	0	0	0	0	0	0
Ets,Ets	1	0	0	1	1	1	1	1	1
Prox1	1	1	0	0	0	0	0	0	0
zf-C2H2,zf-C2H2,zf-C2H2,zf-C2H2,zf-C2H2,zf-C2H2,zf-C2H2,zf-C2H2,zf-C2H2,zf-C2H2,zf-C2H2	1	0	0	1	1	1	1	1	1
CG-1	1	0	0	1	1	1	1	1	1
UNKNOWN	3	3	0	0	0	0	0	0	0
TOTAL	745	192	100	409	403	384	353	253	111

## Sheet: D.melanogaster
Key	Total_Genes	Have_Motifs	CanInferNow	NeededPBMs	NeededPBMS_99	NeededPBMS_95	NeededPBMS_90	NeededPBMS_75	NeededPBMS_50
Homeobox	90	84	5	1	1	0	0	0	0
HLH	55	50	4	1	1	0	0	0	0
zf-C2H2,zf-C2H2,zf-C2H2,zf-C2H2,zf-C2H2	47	20	0	26	26	24	22	15	3
MADF_DNA_bdg	46	20	0	26	26	24	22	15	3
zf-C2H2,zf-C2H2,zf-C2H2,zf-C2H2	30	12	0	18	18	17	15	11	3
zf-C2H2,zf-C2H2	30	5	0	25	25	24	22	18	10
zf-C2H2,zf-C2H2,zf-C2H2	28	12	1	15	15	14	13	8	1
zf-C2H2,zf-C2H2,zf-C2H2,zf-C2H2,zf-C2H2,zf-C2H2	26	6	0	20	20	19	18	14	7
zf-C2H2,zf-C2H2,zf-C2H2,zf-C2H2,zf-C2H2,zf-C2H2,zf-C2H2,zf-C2H2	24	2	0	22	22	21	20	16	10
HMG_box	23	5	2	16	16	15	14	11	5
zf-C2H2,zf-C2H2,zf-C2H2,zf-C2H2,zf-C2H2,zf-C2H2,zf-C2H2	23	2	0	21	21	20	19	16	10
zf-C4	21	18	1	2	2	1	0	0	0
bZIP_1	20	11	4	5	5	4	3	0	0
Fork_head	19	9	7	3	3	3	2	0	0
Myb_DNA-binding	12	2	1	9	9	9	8	6	3
zf-C2H2,zf-C2H2,zf-C2H2,zf-C2H2,zf-C2H2,zf-C2H2,zf-C2H2,zf-C2H2,zf-C2H2	11	2	0	9	9	9	8	7	4
zf-C2H2	10	2	0	7	7	7	6	5	2
zf-C2H2,zf-C2H2,zf-C2H2,zf-C2H2,zf-C2H2,zf-C2H2,zf-C2H2,zf-C2H2,zf-C2H2,zf-C2H2,zf-C2H2,zf-C2H2	9	2	0	7	7	7	7	5	3
Ets	8	8	0	0	0	0	0	0	0
T-box	8	2	6	0	0	0	0	0	0
PAX,Homeobox	7	1	4	1	1	1	1	1	0
CENP-B_N	7	1	1	5	5	5	5	4	2
MH1	6	2	1	3	3	3	3	2	0
HTH_psq	6	2	1	3	3	3	3	2	0
zf-C2H2,zf-C2H2,zf-C2H2,zf-C2H2,zf-C2H2,zf-C2H2,zf-C2H2,zf-C2H2,zf-C2H2,zf-C2H2	5	2	0	3	3	3	3	2	1
BAF1_ABF1	5	0	0	5	5	5	5	4	3
THAP	5	0	0	5	5	5	5	4	3
TBP,TBP	5	0	1	4	4	4	4	3	2
MBD	5	0	0	5	5	5	5	4	3
ARID	5	1	0	4	4	4	4	3	2
Runt	4	1	2	1	1	1	1	0	0
Myb_DNA-binding,Myb_DNA-binding	4	0	1	3	3	3	3	2	1
MADF_DNA_bdg,MADF_DNA_bdg	4	1	0	3	3	3	3	2	1
Pou,Homeobox	4	2	2	0	0	0	0	0	0
RHD	4	1	1	2	2	2	2	1	0
DM	4	2	0	2	2	2	2	1	0
zf-C2H2,zf-C2H2,zf-C2H2,zf-C2H2,zf-C2H2,zf-C2H2,zf-C2H2,zf-C2H2,zf-C2H2,zf-C2H2,zf-C2H2	4	2	0	2	2	2	2	1	0
MADF_DNA_bdg,MADF_DNA_bdg,zf-C2H2,zf-C2H2,zf-C2H2,zf-C2H2,zf-C2H2,zf-C2H2,zf-C2H2	3	0	0	3	3	3	3	3	2
GATA,GATA	3	2	1	0	0	0	0	0	0
GATA	3	2	0	1	1	1	1	1	0
zf-C2H2,zf-C2H2,zf-C2H2,zf-C2H2,zf-C2H2,zf-C2H2,zf-C2H2,zf-C2H2,zf-C2H2,zf-C2H2,zf-C2H2,zf-C2H2,zf-C2H2,zf-C2H2	3	0	0	3	3	3	3	3	2
HMG_box,HMG_box	3	1	0	2	2	2	2	2	1
bZIP_1,bZIP_1,bZIP_1	3	0	0	3	3	3	3	3	2
PAX	3	3	0	0	0	0	0	0	0
zf-CXXC	3	0	0	3	3	3	3	3	2
CSD	3	0	1	2	2	2	2	2	1
mTERF	2	0	0	2	2	2	2	2	1
RFX_DNA_binding	2	0	2	0	0	0	0	0	0
E2F_TDP	2	1	0	1	1	1	1	1	0
zf-C2H2,zf-C2H2,zf-C2H2,zf-C2H2,zf-C2H2,zf-C2H2,zf-C2H2,zf-C2H2,zf-C2H2,zf-C2H2,zf-C2H2,zf-C2H2,zf-C2H2,zf-C2H2,zf-C2H2,zf-C2H2	2	0	0	2	2	2	2	2	1
HSF_DNA-bind	2	1	0	1	1	1	1	1	0
GCM	2	2	0	0	0	0	0	0	0
mTERF,mTERF	2	0	0	2	2	2	2	2	1
FAR1	2	0	0	1	1	1	1	1	1
BAF1_ABF1,zf-C2H2,zf-C2H2	2	2	0	0	0	0	0	0	0
SRF-TF	2	1	1	0	0	0	0	0	0
bZIP_1,bZIP_1	2	1	0	1	1	1	1	1	0
zf-NF-X1,zf-NF-X1,zf-NF-X1,zf-NF-X1,zf-NF-X1,zf-NF-X1,zf-NF-X1,zf-NF-X1,zf-NF-X1	2	0	0	2	2	2	2	2	1
CP2,CP2	2	1	0	1	1	1	1	1	0
Myb_DNA-binding,Myb_DNA-binding,Myb_DNA-binding,Myb_DNA-binding	1	0	0	1	1	1	1	1	1
zf-C2H2,zf-C2H2,zf-C2H2,zf-C2H2,zf-C2H2,zf-C2H2,zf-C2H2,zf-C2H2,zf-C2H2,zf-C2H2,zf-C2H2,zf-C2H2,zf-C2H2,zf-C2H2,zf-C2H2,zf-C2H2,zf-C2H2,zf-C2H2,zf-C2H2,zf-C2H2,zf-C2H2,zf-C2H2,zf-C2H2,zf-C2H2	1	0	0	1	1	1	1	1	1
Homeobox,BAF1_ABF1	1	1	0	0	0	0	0	0	0
PLATZ,zf-C2H2,zf-C2H2,zf-C2H2,PLATZ,zf-C2H2,zf-C2H2,zf-C2H2	1	0	0	1	1	1	1	1	1
THAP,zf-C2H2,zf-C2H2,zf-C2H2,zf-C2H2,zf-C2H2,zf-C2H2,zf-C2H2	1	0	0	1	1	1	1	1	1
CP2	1	0	0	1	1	1	1	1	1
CUT,CUT,CUT,Homeobox	1	0	0	1	1	1	1	1	1
SAND	1	1	0	0	0	0	0	0	0
HLH,HLH	1	1	0	0	0	0	0	0	0
zf-C2H2,zf-C2H2,zf-C2H2,zf-C2H2,Homeobox,zf-C2H2,zf-C2H2,zf-C2H2	1	0	0	1	1	1	1	1	1
CXC	1	0	0	1	1	1	1	1	1
zf-C2HC,zf-C2HC,zf-C2HC,zf-C2HC	1	0	0	1	1	1	1	1	1
ARID,RFX_DNA_binding	1	0	0	1	1	1	1	1	1
HMG_box,bZIP_1	1	0	0	1	1	1	1	1	1
MADF_DNA_bdg,MADF_DNA_bdg,MADF_DNA_bdg,zf-C2H2,zf-C2H2,zf-C2H2,zf-C2H2,zf-C2H2,zf-C2H2	1	0	0	1	1	1	1	1	1
AT_hook,AT_hook,AT_hook,AT_hook,AT_hook,AT_hook,AT_hook,AT_hook,AT_hook,AT_hook	1	0	0	1	1	1	1	1	1
Prox1,Prox1	1	0	0	1	1	1	1	1	1
CUT,Homeobox	1	1	0	0	0	0	0	0	0
AT_hook	1	1	0	0	0	0	0	0	0
HTH_psq,HTH_psq	1	1	0	0	0	0	0	0	0
NDT80_PhoG	1	0	0	1	1	1	1	1	1
TF_AP-2	1	0	0	1	1	1	1	1	1
zf-C2H2,zf-C2H2,zf-C2H2,zf-C2H2,zf-C2H2,zf-C2H2,zf-C2H2,zf-C2H2,zf-C2H2,zf-C2H2,zf-C2H2,zf-C2H2,zf-C2H2,zf-C2H2,zf-C2H2	1	0	0	1	1	1	1	1	1
zf-C2HC,zf-C2HC,zf-C2HC	1	0	0	1	1	1	1	1	1
FLO_LFY	1	0	0	1	1	1	1	1	1
BAF1_ABF1,HLH,BAF1_ABF1	1	1	0	0	0	0	0	0	0
CXC,CXC	1	0	1	0	0	0	0	0	0
MADF_DNA_bdg,MADF_DNA_bdg,zf-C2H2,zf-C2H2,zf-C2H2,zf-C2H2,zf-C2H2,zf-C2H2	1	0	0	1	1	1	1	1	1
Homeobox,Homeobox	1	0	0	1	1	1	1	1	1
MBD,MBD	1	0	0	1	1	1	1	1	1
zf-C2H2,zf-C2H2,zf-C2H2,zf-C2H2,zf-C2H2,zf-C2H2,zf-C2H2,zf-C2H2,zf-C2H2,zf-C2H2,zf-C2H2,zf-C2H2,zf-C2H2,zf-C2H2,zf-C2H2,zf-C2H2,zf-C2H2,zf-C2H2	1	1	0	0	0	0	0	0	0
THAP,MBD	1	0	0	1	1	1	1	1	1
Pou,Pou,Homeobox	1	0	1	0	0	0	0	0	0
E2F_TDP,DP	1	0	0	1	1	1	1	1	1
SART-1	1	0	0	1	1	1	1	1	1
P53	1	0	0	1	1	1	1	1	1
zf-C2H2,zf-C2H2,zf-C2H2,zf-C2H2,zf-C2H2,zf-C2H2,Homeobox,zf-C2H2,zf-C2H2,zf-C2H2	1	0	0	1	1	1	1	1	1
LAG1-DNAbind	1	1	0	0	0	0	0	0	0
HTH_psq,HTH_psq,HTH_psq	1	1	0	0	0	0	0	0	0
bZIP_1,bZIP_1,bZIP_1,bZIP_1	1	0	0	1	1	1	1	1	1
CBFB_NFYA	1	0	1	0	0	0	0	0	0
zf-C2H2,zf-C2H2,zf-C2H2,zf-C2H2,zf-C2H2,zf-C2H2,Homeobox,Homeobox,zf-C2H2,zf-C2H2,Homeobox	1	0	0	1	1	1	1	1	1
STAT_bind	1	1	0	0	0	0	0	0	0
BrkDBD	1	1	0	0	0	0	0	0	0
zf-C2H2,zf-C2H2,zf-C2H2,zf-C2H2,Myb_DNA-binding,zf-C2H2,zf-C2H2	1	0	0	1	1	1	1	1	1
MADF_DNA_bdg,MADF_DNA_bdg,MADF_DNA_bdg	1	0	0	1	1	1	1	1	1
Myb_DNA-binding,GATA	1	0	0	1	1	1	1	1	1
THAP,zf-C2H2,zf-C2H2,zf-C2H2,zf-C2H2	1	0	0	1	1	1	1	1	1
zf-C2HC,zf-C2HC	1	0	0	1	1	1	1	1	1
Homeobox,CUT,CUT,CUT,Homeobox	1	1	0	0	0	0	0	0	0
Prox1	1	0	0	1	1	1	1	1	1
THAP,THAP,THAP,THAP,THAP,THAP,THAP,THAP,THAP,THAP,THAP,THAP,THAP,THAP,THAP,THAP,THAP,THAP,THAP,THAP,THAP,THAP,THAP,THAP,THAP,THAP,THAP,THAP	1	0	0	1	1	1	1	1	1
THAP,THAP	1	0	0	1	1	1	1	1	1
HTH_psq,HTH_psq,HTH_psq,HTH_psq	1	0	0	1	1	1	1	1	1
BAF1_ABF1,BAF1_ABF1	1	0	0	1	1	1	1	1	1
TEA,TEA	1	1	0	0	0	0	0	0	0
CSD,CSD,CSD,CSD,CSD,CSD	1	0	0	1	1	1	1	1	1
zf-C2HC	1	0	0	1	1	1	1	1	1
CG-1	1	0	0	1	1	1	1	1	1
UNKNOWN	7	7	0	0	0	0	0	0	0
Total	743	330	53	356	356	341	322	255	139

## Sheet: H.sapiens
Key	Total_Genes	Have_Motifs	CanInferNow	NeededPBMs	NeededPBMS_99	NeededPBMS_95	NeededPBMS_90	NeededPBMS_75	NeededPBMS_50
Homeobox	205	139	47	19	17	9	0	0	0
HLH	112	56	40	11	9	5	2	0	0
zf-C2H2,zf-C2H2,zf-C2H2	96	27	9	54	54	50	45	30	6
zf-C2H2,zf-C2H2,zf-C2H2,zf-C2H2	80	27	18	34	34	30	26	14	0
zf-C2H2,zf-C2H2,zf-C2H2,zf-C2H2,zf-C2H2,zf-C2H2,zf-C2H2,zf-C2H2,zf-C2H2	73	8	5	57	57	54	50	39	21
zf-C2H2,zf-C2H2,zf-C2H2,zf-C2H2,zf-C2H2	69	22	6	39	39	36	33	22	5
bZIP_1	66	44	10	12	12	9	6	0	0
zf-C2H2,zf-C2H2,zf-C2H2,zf-C2H2,zf-C2H2,zf-C2H2,zf-C2H2	66	10	4	46	46	43	40	30	13
zf-C2H2,zf-C2H2	59	1	2	52	52	50	47	38	23
zf-C2H2,zf-C2H2,zf-C2H2,zf-C2H2,zf-C2H2,zf-C2H2,zf-C2H2,zf-C2H2,zf-C2H2,zf-C2H2,zf-C2H2,zf-C2H2	59	1	1	49	49	47	44	35	20
zf-C2H2,zf-C2H2,zf-C2H2,zf-C2H2,zf-C2H2,zf-C2H2,zf-C2H2,zf-C2H2	58	3	5	48	48	46	43	34	19
zf-C2H2,zf-C2H2,zf-C2H2,zf-C2H2,zf-C2H2,zf-C2H2,zf-C2H2,zf-C2H2,zf-C2H2,zf-C2H2,zf-C2H2	54	4	1	46	46	44	41	33	19
zf-C4	51	44	7	0	0	0	0	0	0
zf-C2H2,zf-C2H2,zf-C2H2,zf-C2H2,zf-C2H2,zf-C2H2,zf-C2H2,zf-C2H2,zf-C2H2,zf-C2H2,zf-C2H2,zf-C2H2,zf-C2H2	51	3	1	34	34	32	29	22	9
zf-C2H2,zf-C2H2,zf-C2H2,zf-C2H2,zf-C2H2,zf-C2H2	50	13	8	28	28	26	23	16	3
Fork_head	50	34	16	0	0	0	0	0	0
HMG_box	47	20	8	16	16	14	12	5	0
zf-C2H2,zf-C2H2,zf-C2H2,zf-C2H2,zf-C2H2,zf-C2H2,zf-C2H2,zf-C2H2,zf-C2H2,zf-C2H2,zf-C2H2,zf-C2H2,zf-C2H2,zf-C2H2	43	0	2	29	29	27	25	19	8
zf-C2H2,zf-C2H2,zf-C2H2,zf-C2H2,zf-C2H2,zf-C2H2,zf-C2H2,zf-C2H2,zf-C2H2,zf-C2H2	43	4	2	35	35	33	31	25	14
Homeobox,Homeobox	35	6	25	4	4	3	1	0	0
zf-C2H2,zf-C2H2,zf-C2H2,zf-C2H2,zf-C2H2,zf-C2H2,zf-C2H2,zf-C2H2,zf-C2H2,zf-C2H2,zf-C2H2,zf-C2H2,zf-C2H2,zf-C2H2,zf-C2H2	35	1	0	32	32	31	29	24	15
zf-C2H2	31	1	0	29	29	28	26	22	14
zf-C2H2,zf-C2H2,zf-C2H2,zf-C2H2,zf-C2H2,zf-C2H2,zf-C2H2,zf-C2H2,zf-C2H2,zf-C2H2,zf-C2H2,zf-C2H2,zf-C2H2,zf-C2H2,zf-C2H2,zf-C2H2	29	1	0	24	24	23	22	17	10
Ets	28	27	1	0	0	0	0	0	0
Myb_DNA-binding	23	2	2	17	17	16	15	12	6
Pou,Homeobox	21	15	6	0	0	0	0	0	0
zf-C2H2,zf-C2H2,zf-C2H2,zf-C2H2,zf-C2H2,zf-C2H2,zf-C2H2,zf-C2H2,zf-C2H2,zf-C2H2,zf-C2H2,zf-C2H2,zf-C2H2,zf-C2H2,zf-C2H2,zf-C2H2,zf-C2H2,zf-C2H2,zf-C2H2	19	3	0	13	13	13	12	9	4
T-box	16	14	1	1	1	1	0	0	0
zf-C2H2,zf-C2H2,zf-C2H2,zf-C2H2,zf-C2H2,zf-C2H2,zf-C2H2,zf-C2H2,zf-C2H2,zf-C2H2,zf-C2H2,zf-C2H2,zf-C2H2,zf-C2H2,zf-C2H2,zf-C2H2,zf-C2H2	15	1	0	14	14	14	13	11	7
ARID	15	2	3	6	4	4	3	3	1
Myb_DNA-binding,Myb_DNA-binding	13	2	0	10	10	10	9	7	4
zf-C2H2,zf-C2H2,zf-C2H2,zf-C2H2,zf-C2H2,zf-C2H2,zf-C2H2,zf-C2H2,zf-C2H2,zf-C2H2,zf-C2H2,zf-C2H2,zf-C2H2,zf-C2H2,zf-C2H2,zf-C2H2,zf-C2H2,zf-C2H2	13	2	0	10	10	10	9	7	4
THAP	12	2	0	10	10	10	9	7	4
MH1	12	12	0	0	0	0	0	0	0
zf-CXXC	11	6	0	5	5	5	4	3	0
RHD	10	9	1	0	0	0	0	0	0
CENP-B_N	10	1	0	8	8	8	7	6	3
RFX_DNA_binding	9	5	4	0	0	0	0	0	0
IRF	9	8	1	0	0	0	0	0	0
E2F_TDP	8	6	0	2	2	2	2	0	0
HMG_box,HMG_box	8	0	0	7	7	7	7	5	3
MBD	8	2	0	6	6	6	6	4	2
SAND	8	3	1	3	3	3	3	1	0
zf-C2H2,zf-C2H2,zf-C2H2,zf-C2H2,zf-C2H2,zf-C2H2,zf-C2H2,zf-C2H2,zf-C2H2,zf-C2H2,zf-C2H2,zf-C2H2,zf-C2H2,zf-C2H2,zf-C2H2,zf-C2H2,zf-C2H2,zf-C2H2,zf-C2H2,zf-C2H2,zf-C2H2	8	1	1	5	5	5	5	3	1
STAT_bind	8	7	0	1	1	1	1	0	0
CP2	7	3	0	4	4	4	4	3	1
Pou	7	0	0	1	1	1	1	1	1
PAX	7	4	1	2	2	2	2	1	0
CSD	7	1	2	2	2	2	2	2	1
HSF_DNA-bind	7	4	1	1	1	1	1	1	0
GATA,GATA	6	6	0	0	0	0	0	0	0
GATA	6	0	1	5	5	5	5	4	2
DM	6	5	0	1	1	1	1	0	0
SRF-TF	6	5	1	0	0	0	0	0	0
zf-C2H2,zf-C2H2,zf-C2H2,zf-C2H2,zf-C2H2,zf-C2H2,zf-C2H2,zf-C2H2,zf-C2H2,zf-C2H2,zf-C2H2,zf-C2H2,zf-C2H2,zf-C2H2,zf-C2H2,zf-C2H2,zf-C2H2,zf-C2H2,zf-C2H2,zf-C2H2	5	4	0	1	1	1	1	0	0
zf-C2H2,zf-C2H2,zf-C2H2,zf-C2H2,zf-C2H2,zf-C2H2,zf-C2H2,zf-C2H2,zf-C2H2,zf-C2H2,zf-C2H2,zf-C2H2,zf-C2H2,zf-C2H2,zf-C2H2,zf-C2H2,zf-C2H2,zf-C2H2,zf-C2H2,zf-C2H2,zf-C2H2,zf-C2H2	5	4	0	1	1	1	1	0	0
TF_AP-2	5	4	1	0	0	0	0	0	0
PAX,Homeobox	5	5	0	0	0	0	0	0	0
zf-C2H2,zf-C2H2,zf-C2H2,zf-C2H2,zf-C2H2,zf-C2H2,zf-C2H2,zf-C2H2,zf-C2H2,zf-C2H2,zf-C2H2,zf-C2H2,zf-C2H2,zf-C2H2,zf-C2H2,zf-C2H2,zf-C2H2,zf-C2H2,zf-C2H2,zf-C2H2,zf-C2H2,zf-C2H2,zf-C2H2	5	4	0	1	1	1	1	0	0
bZIP_1,bZIP_1	5	0	0	5	5	5	5	4	3
zf-C2HC	5	0	0	5	5	5	5	4	3
Runt	4	2	2	0	0	0	0	0	0
zf-C2H2,zf-C2H2,zf-C2H2,zf-C2H2,zf-C2H2,zf-C2H2,zf-C2H2,zf-C2H2,zf-C2H2,zf-C2H2,zf-C2H2,zf-C2H2,zf-C2H2,zf-C2H2,zf-C2H2,zf-C2H2,zf-C2H2,zf-C2H2,zf-C2H2,zf-C2H2,zf-C2H2,zf-C2H2,zf-C2H2,zf-C2H2,zf-C2H2	4	1	0	2	2	2	2	1	1
GTF2I	4	0	0	1	1	1	1	1	1
Myb_DNA-binding,GATA	4	0	0	2	2	2	2	1	1
CUT,Homeobox	4	4	0	0	0	0	0	0	0
TEA	4	1	0	2	2	2	2	1	1
GTF2I,GTF2I	3	0	0	2	2	2	2	2	1
Myb_DNA-binding,Myb_DNA-binding,Myb_DNA-binding	3	3	0	0	0	0	0	0	0
TBP,TBP	3	1	1	1	1	1	1	1	0
TEA,TEA	3	3	0	0	0	0	0	0	0
Homeobox,Homeobox,Homeobox,Homeobox,Homeobox	3	1	0	2	2	2	2	2	1
E2F_TDP,DP	3	1	2	0	0	0	0	0	0
P53	3	2	1	0	0	0	0	0	0
HLH,HLH,HLH	2	2	0	0	0	0	0	0	0
HLH,HLH	2	2	0	0	0	0	0	0	0
MADF_DNA_bdg	2	0	1	1	1	1	1	1	0
zf-C2HC,zf-C2HC,zf-C2HC,zf-C2HC,zf-C2HC,zf-C2HC	2	0	0	2	2	2	2	2	1
KilA-N	2	0	0	1	1	1	1	1	1
GCM	2	2	0	0	0	0	0	0	0
TBP	2	0	0	2	2	2	2	2	1
AT_hook,AT_hook,AT_hook	2	2	0	0	0	0	0	0	0
LAG1-DNAbind	2	1	0	1	1	1	1	1	0
Prox1,Prox1,Prox1	2	1	0	1	1	1	1	1	0
CUT,CUT,Homeobox	2	1	1	0	0	0	0	0	0
bZIP_1,bZIP_1,bZIP_1	2	1	0	1	1	1	1	1	0
Fork_head,Fork_head	2	2	0	0	0	0	0	0	0
CG-1	2	0	0	1	1	1	1	1	1
Homeobox,Homeobox,Homeobox	2	2	0	0	0	0	0	0	0
zf-C2H2,zf-C2H2,zf-C2H2,zf-C2H2,zf-C2H2,zf-C2H2,zf-C2H2,zf-C2H2,zf-C2H2,zf-C2H2,zf-C2H2,zf-C2H2,zf-C2H2,zf-C2H2,zf-C2H2,zf-C2H2,zf-C2H2,zf-C2H2,zf-C2H2,zf-C2H2,zf-C2H2,zf-C2H2,zf-C2H2,zf-C2H2	2	0	0	2	2	2	2	2	1
CUT,CUT,CUT,Homeobox	2	2	0	0	0	0	0	0	0
mTERF	2	1	0	1	1	1	1	1	0
E2F_TDP,E2F_TDP	2	2	0	0	0	0	0	0	0
CXC,CXC	2	0	1	1	1	1	1	1	0
MADF_DNA_bdg,MADF_DNA_bdg,zf-C2H2,zf-C2H2,zf-C2H2,zf-C2H2,zf-C2H2,zf-C2H2	2	1	1	0	0	0	0	0	0
MBD,MBD	2	1	0	1	1	1	1	1	0
mTERF,mTERF	2	0	0	2	2	2	2	2	1
HMG_box,HMG_box,HMG_box,HMG_box,HMG_box,HMG_box	1	0	0	1	1	1	1	1	1
zf-C2H2,zf-C2H2,zf-C2H2,zf-C2H2,zf-C2H2,zf-C2H2,zf-C2H2,zf-C2H2,Homeobox,Homeobox,zf-C2H2,zf-C2H2,Homeobox,zf-C2H2,Homeobox,zf-C2H2	1	0	0	1	1	1	1	1	1
zf-C2H2,zf-C2H2,zf-C2H2,zf-C2H2,Homeobox,zf-C2H2,zf-C2H2,zf-C2H2	1	1	0	0	0	0	0	0	0
DP	1	0	0	1	1	1	1	1	1
Homeobox,Homeobox,Homeobox,Homeobox	1	0	0	1	1	1	1	1	1
zf-NF-X1,zf-NF-X1,zf-NF-X1,zf-NF-X1,zf-NF-X1,zf-NF-X1,zf-NF-X1,zf-NF-X1	1	0	0	1	1	1	1	1	1
GTF2I,GTF2I,GTF2I,GTF2I,GTF2I	1	1	0	0	0	0	0	0	0
ARID,RFX_DNA_binding	1	0	0	1	1	1	1	1	1
zf-NF-X1,zf-NF-X1,zf-NF-X1,zf-NF-X1,zf-NF-X1,zf-NF-X1	1	0	0	1	1	1	1	1	1
NDT80_PhoG	1	1	0	0	0	0	0	0	0
HTH_psq,HTH_psq	1	0	0	1	1	1	1	1	1
MBD,zf-CXXC	1	0	0	1	1	1	1	1	1
zf-C2H2,zf-C2H2,zf-C2H2,zf-C2H2,Myb_DNA-binding,zf-C2H2	1	1	0	0	0	0	0	0	0
zf-C2H2,bZIP_1	1	1	0	0	0	0	0	0	0
GAGA_bind	1	1	0	0	0	0	0	0	0
zf-C2H2,zf-C2H2,zf-C2H2,zf-C2H2,zf-C2H2,Homeobox	1	0	0	1	1	1	1	1	1
GTF2I,GTF2I,GTF2I,GTF2I,GTF2I,GTF2I	1	1	0	0	0	0	0	0	0
SART-1	1	0	0	1	1	1	1	1	1
Myb_DNA-binding,Myb_DNA-binding,Myb_DNA-binding,Myb_DNA-binding,Myb_DNA-binding	1	1	0	0	0	0	0	0	0
HSF_DNA-bind,HSF_DNA-bind	1	0	0	1	1	1	1	1	1
CBFB_NFYA	1	1	0	0	0	0	0	0	0
DP,DP	1	0	0	1	1	1	1	1	1
SAND,HMG_box,HMG_box	1	0	0	1	1	1	1	1	1
P53,P53	1	1	0	0	0	0	0	0	0
CSD,CSD,CSD,CSD,CSD,CSD,CSD	1	0	0	1	1	1	1	1	1
HLH,bZIP_1	1	1	0	0	0	0	0	0	0
Prox1	1	0	0	1	1	1	1	1	1
zf-NF-X1,zf-NF-X1,zf-NF-X1,zf-NF-X1,zf-NF-X1,zf-NF-X1,zf-NF-X1,zf-NF-X1,zf-NF-X1,zf-NF-X1,zf-NF-X1	1	0	0	1	1	1	1	1	1
zf-C2HC,zf-C2HC,zf-C2HC,zf-C2HC,zf-C2HC,zf-C2HC,zf-C2HC	1	0	0	1	1	1	1	1	1
CUT	1	0	0	1	1	1	1	1	1
zf-C2H2,zf-C2H2,zf-C2H2,zf-C2H2,zf-C2H2,Homeobox,zf-C2H2,zf-C2H2,zf-C2H2	1	0	0	1	1	1	1	1	1
zf-NF-X1,zf-NF-X1	1	0	0	1	1	1	1	1	1
HMG_box,HMG_box,HMG_box,HMG_box,HMG_box	1	0	0	1	1	1	1	1	1
GATA,GATA,GATA	1	1	0	0	0	0	0	0	0
Runt,Runt	1	1	0	0	0	0	0	0	0
MBD,zf-CXXC,zf-CXXC,zf-CXXC	1	0	0	1	1	1	1	1	1
DM,DM	1	1	0	0	0	0	0	0	0
MADF_DNA_bdg,MADF_DNA_bdg	1	0	0	1	1	1	1	1	1
Prox1,Prox1	1	0	0	1	1	1	1	1	1
T-box,HLH	1	1	0	0	0	0	0	0	0
zf-C2HC,zf-C2HC,zf-C2HC	1	0	0	1	1	1	1	1	1
STAT_bind,STAT_bind	1	1	0	0	0	0	0	0	0
MADF_DNA_bdg,MADF_DNA_bdg,zf-C2H2,zf-C2H2,zf-C2H2,zf-C2H2,zf-C2H2,zf-C2H2,zf-C2H2,zf-C2H2,zf-C2H2,zf-C2H2	1	1	0	0	0	0	0	0	0
zf-C2H2,Myb_DNA-binding,zf-C2H2,zf-C2H2	1	0	1	0	0	0	0	0	0
Pou,Pou,Homeobox	1	1	0	0	0	0	0	0	0
MBD,zf-CXXC,zf-CXXC	1	0	0	1	1	1	1	1	1
HTH_psq	1	0	1	0	0	0	0	0	0
BrkDBD	1	0	0	1	1	1	1	1	1
EIN3	1	1	0	0	0	0	0	0	0
zf-C2HC,zf-C2HC	1	0	0	1	1	1	1	1	1
Ets,Ets	1	1	0	0	0	0	0	0	0
THAP,THAP	1	0	0	1	1	1	1	1	1
zf-C4,zf-C4	1	1	0	0	0	0	0	0	0
zf-NF-X1,zf-NF-X1,zf-NF-X1,zf-NF-X1,zf-NF-X1,zf-NF-X1,zf-NF-X1,zf-NF-X1,zf-NF-X1	1	0	0	1	1	1	1	1	1
CP2,CP2	1	1	0	0	0	0	0	0	0
GATA,zf-C2H2,zf-C2H2,zf-C2H2,zf-C2H2,zf-C2H2,zf-C2H2,zf-C2H2,zf-C2H2,zf-C2H2	1	1	0	0	0	0	0	0	0
UNKNOWN	51	51	0	0	0	0	0	0	0
Total	2038	764	257	905	899	844	769	580	292
