# Supplementary material for: Mapping and analysis of Caenorhabditis elegans transcription factor sequence specificities
Source: eLife. 2015 Apr 23;4:e06967. doi: 10.7554/eLife.06967 (PMC4434323; doi:10.7554/eLife.06967)
Supplement: Supplementary file 4. — List of primers and gene synthesis constructs used to obtain TF clones in this study. This spreadsheet contains primers used to clone TFs as well as gene synthesis constructs that were cloned in to the PBM plasmid backbone (Supplementary file 5). DOI: http://dx.doi.org/10.7554/eLife.06967.035 [file elife06967s010.xlsx]

## Sheet: plasmid_pool
	Well_position	pTH	F_full_primer	R_full_primer	Insert Sequence	insert_AAs	Gene_ID	Species	Gene	DBD	DBDs
1	13A05	pTH8980	TGTCACGGACCTACGGCGCGCCCAAGTAGACAATGCTCACGAAATG	TAGTGCACCACAATCCTGCAGGGATGAACATTTCGTGTTTTATGCTTAT	CAAGTAGACAATGCTCACGAAATGGTTGAAGCTGAAAAAGTTTATTACGAGAATGAAATGGAAGATCTCGTTTATCATGAGATTTACAGAATTGAAGGCAATCAGAAACAGGAAAATTATAAGAGAATCCGAAATATAGTTGGATCAAGCGCCTCCTGTCTCGTCTGCCAACGTTCCGAATCCGAAAAAATCCGTCTTTTCAAGTGGCCAAAATCAGAAGAACTCAAAGAGCAATGGTTACATTTCTTTCGGCTTCCAGCTACAGTACTTCAGAGTGCAACACAAGAACCATATATCTGTTGTTATCACTTCTCAGCCGACACTTTTGTCATGATCGATGATCGAATCTTCTGGAAAATGACCGCACTTCCAAAATATCGACAACGTCGTCCGGGGCTC…	QVDNAHEMVEAEKVYYENEMEDLVYHEIYRIEGNQKQENYKRIRNIVGSSASCLVCQRSESEKIRLFKWPKSEELKEQWLHFFRLPATVLQSATQEPYICCYHFSADTFVMIDDRIFWKMTALPKYRQRRPGLAEPFPWEPAVKHKMEMMQSTDTTNNSSVVEYKIRYRMPFNKHKTRNVHQ	Z003_330	Caenorhabditis_elegans	B0336.7	THAP	THAP
2	13B01	pTH8981	TGTCACGGACCTACGGCGCGCCATGGAACCTATTTGGAGAAATTATCCT	TAGTGCACCACAATCCTGCAGGGTAACTGTTGTACAGAAGTAGATTGTT	ATGGAACCTATTTGGAGAAATTATCCTTACCCAACCTACCCAGGACATCACAATTTTCAATTTGATCCCCTACTGTCAGATGGCTCCCACACGGGCGTCAATCAATTGGGCGGTGTATTTGTCAACGGGCGTCCTCTTGCTGACACAGTTCGTGCTCAAATAGTCGAAATGTCACAACATGGTACACGACCATGTGACATATCAAGACAGTTAAAAGTCTCCCATGGATGTGTTTCGAAAATCCTCGGTAGATATTATTCAACAGGATCTGTCAGACCAGGTGTAATTGGAGGCTCAAAGCCAAAAGTTGCCACACCACGAGTCGTGGAATGTATTGCTGGTTATAAAAGAGCAAATCCGACAATGTTCGCATGGGAAATACGACAGAAATTGATTGAG…	MEPIWRNYPYPTYPGHHNFQFDPLLSDGSHTGVNQLGGVFVNGRPLADTVRAQIVEMSQHGTRPCDISRQLKVSHGCVSKILGRYYSTGSVRPGVIGGSKPKVATPRVVECIAGYKRANPTMFAWEIRQKLIEDQICGEENVPSVSSINRIVRNKSFMAQLAAPTSVTSSAARPSSATSHHQRSPPRGVQQHMQQSTSVQQLQ	Z003_944	Caenorhabditis_elegans	C04G2.7	PAX	PAX
3	13D01	pTH8982	TGTCACGGACCTACGGCGCGCCTCATTTGATGTTACCACTGTATCAACC	TAGTGCACCACAATCCTGCAGGTGATTGTATTTATATCACAAATATAAT	TCATTTGATGTTACCACTGTATCAACCACCGCTACTTCAACTATTATGAACTCAACCGATAAGTTCATTGCAAGAATTCAAGAGGCTGATAGTACAACAAAATCGCCGAAAGGAACATCTCCAGCAGCGTTAATGCATGGACACTGCGAAGAGGATTTTGATGATGGAGAAGAGTTAAATACTAAAGAATTGGCTCTTCAAATTGCTGCCGAACTGAAACGATACTCCATACCACAAGCAATTTTCGCGGAAAGAGTTCTTTGCAGATCACAAGGAACTTTATCCGATCTACTTCGCAATCCAAAACCATGGTCTAAGTTGAAAAGTGGCCGAGAAACATTCAGACGGATGGCTAAGTGGTTGGAGGAACCTGAGTTTCAAAGAATGTCTGCGTTGAGA…	SFDVTTVSTTATSTIMNSTDKFIARIQEADSTTKSPKGTSPAALMHGHCEEDFDDGEELNTKELALQIAAELKRYSIPQAIFAERVLCRSQGTLSDLLRNPKPWSKLKSGRETFRRMAKWLEEPEFQRMSALRLAACKRKEEHTTPNSPQMVVPKKTRLVFSDIQRRTLQAIFRETKRPSREMQITISQQLNLDPTTVANFFMNARRRGHDLKQETSESEERSEEPSIHFEHSASSSSASSSSSSSMQLDNYICDINTIN	Z003_2072	Caenorhabditis_elegans	C17H12.9	CUT,Homeobox	Homeobox
4	13D06	pTH8983	TGTCACGGACCTACGGCGCGCCTGTGATGGATTTCAAGCCGAAG	TAGTGCACCACAATCCTGCAGGCAGCCATCTCATTTTCGATCTCATA	TGTGATGGATTTCAAGCCGAAGGATCTGATCATCATCATTCCACGATGACTCCATTCCAAGAGAGTCAAAGGAATGTTTATCAAATTTTGTATGGACATCCGGCAAACGACGATTTTCCGCGCCCTATAACACCACTGCAGATCACAATTCCCGAAGGAGATGCGTCACCGACTGTGCCAGTTTCCTGTGGTGTCGTGAATGGAAAGATGCATCTCAACCTGTTCATGTGCCCTGGGATTCATCAGCCGTGTATTGAAGTGGGAAACGATCTTCTTTCTCCGAAGCAGTTCACAATCCGTGGCGACAAAGAGCGTCAGAAAGATTGGAAGGCGAGCATCCGTGTTGGAAGATCTTCGTTGAGAACTCACATGGAAGCAATGACCATCGACTTCTACGAG…	CDGFQAEGSDHHHSTMTPFQESQRNVYQILYGHPANDDFPRPITPLQITIPEGDASPTVPVSCGVVNGKMHLNLFMCPGIHQPCIEVGNDLLSPKQFTIRGDKERQKDWKASIRVGRSSLRTHMEAMTIDFYEHMNRCSGKCQSRNYVNAPSEEVLQARKSKRTSEAGQLKYEIENEMAG	Z003_2410	Caenorhabditis_elegans	C25G4.4	SAND	SAND
5	13F02	pTH8984	TGTCACGGACCTACGGCGCGCCATGGTTGCTGATGTACTCCGA	TAGTGCACCACAATCCTGCAGGCTCCTTGTTTCTTCTTGTCGTCG	ATGGTTGCTGATGTACTCCGACAGTCAGTTCTCGTGCCTATTTCCATGTATCCACAGTATCCAGTGCCTAGGAGGTACACAACATCTGTTTTCAAGGAGTATCAAAAGAAGAAGAAGATTTATTATTGCCAAAGATGTTTAAACCATGATGTTCCAAGGCCTAGGAAAAATCACAAATGTGAGTGTCCATACGCAGATTGCACTTGTGAAAAGTGTGGATTAGTGGAAAAACGGAGAATTTTGAATATTCGGCTTCAAAATTATAATCAGTTCAATATTGAGAATGAGAATGATTCAAAGTTGATTATTGTCGAGGACGACGACAAGAAGAAACAAGGAG	MVADVLRQSVLVPISMYPQYPVPRRYTTSVFKEYQKKKKIYYCQRCLNHDVPRPRKNHKCECPYADCTCEKCGLVEKRRILNIRLQNYNQFNIENENDSKLIIVEDDDKKKQGG	Z003_3035	Caenorhabditis_elegans	C34D1.2	DM	DM
6	13F09	pTH8985	TGTCACGGACCTACGGCGCGCCGATTTACGTCGAACGAAAAGTGAATC	TAGTGCACCACAATCCTGCAGGTCCTAGAGAAGATGAACGCGAC	GATTTACGTCGAACGAAAAGTGAATCCGATCTTGTCGATCGAATCATTTGGCCGTTGGTTCGGAGCGCCCTTCAAAATTTCATACGCCGTGAGGATTGCCATCAAATGCACCTGGAGCACAATTATTCTTCTCTCTACCAAACTCACGACTCGGATGAGGAAAATCAACCGGTGGTGGAGGTGGAGAAACTGATTACCTATGAAGAATACCAAGAAAATCTTTATTCCGCAGAATTTGCATCTCCACAGACTCCACCGCCAATTCCACCACCTCCCGCCGTCTACTATGACAATTTCTCGGATGCTCCTCGAAAACGCGGTCGACCAGTTGGATCAAGAAATCGGAAGGAGGGAGACACCACAATTCCGAAGCAGCAGAGAAAACGGAATCCACAACCG…	DLRRTKSESDLVDRIIWPLVRSALQNFIRREDCHQMHLEHNYSSLYQTHDSDEENQPVVEVEKLITYEEYQENLYSAEFASPQTPPPIPPPPAVYYDNFSDAPRKRGRPVGSRNRKEGDTTIPKQQRKRNPQPVGRGRGRGGGRPRGSRSSRGSMDDGGGSRRHSTASDANESAELLNQPVTKQLRDEIKEIKLKYTKMMMDRGFEQAKDEYFRNRDAALSKWTPEQWKEHNEQCVAARLSSLIPYDQRYFLPTQRVLARLDLEDGDLRLPAVHLPIAIQRCVTKLGTAHDCHVRCDKLTGDAWCSVLADYHCDIVRDYYSDNFYISTLGTEAVFVDGRAVRRPRLTPFEAAEKLRTRGSSTIIPPHIKCRCQKHSDLQISRQESTGELVRCGILKLEH…	Z003_3579	Caenorhabditis_elegans	C44B9.4	AT_hook	AT_hook
7	13F11	pTH8986	TGTCACGGACCTACGGCGCGCCACCAGTGAGATGAAAAACGAAGAG	TAGTGCACCACAATCCTGCAGGCACTACTTTGCTCCGTTGGC	ACCAGTGAGATGAAAAACGAAGAGATGCTGGTTCCAAGTGATCCAAATTTCGAGATAGACGGGAGACGCGTTCAGGAGAATATGTATGATCAAGCATCGGAACTCAGCTATACTTACCTGGATACTCCATCTGAACATATCTGGACACCAATTGTACCTCTAAATGCCACCACGGTGCCGGTTACCTGTGGATATGTCAAAGGAATTATGCATCTCAAATTGTTCAGGTGCCCCGGAATTCGTCAGGCTTGCATCGAATATGAATCACAGTATCTGACTCCGAAACAATTTACGGAACTTGGTGGAAAAGGGCGACAGAAAGACTGGAAGGCGTGTATTCGTGTGGAGAATGTTAGCTTGAGAACACTATTGGAGAACAAAACCATCGATTTCTATAAT…	TSEMKNEEMLVPSDPNFEIDGRRVQENMYDQASELSYTYLDTPSEHIWTPIVPLNATTVPVTCGYVKGIMHLKLFRCPGIRQACIEYESQYLTPKQFTELGGKGRQKDWKACIRVENVSLRTLLENKTIDFYNHKSICHGQCQSRNYMNSTGRAPVNKRHLEDVLASGDDASEPTEQSSG	Z003_3628	Caenorhabditis_elegans	C44F1.2	SAND	SAND
8	13G03	pTH8987	TGTCACGGACCTACGGCGCGCCTCGATGTACATTCCTTCAATTACAGC	TAGTGCACCACAATCCTGCAGGTTAGAAGAAATGTCAGAACATTTTTCT	TCGATGTACATTCCTTCAATTACAGCCGATATGCTCAAGAATGATGGAAATGATTTGACTGTGCAAACACGCTCAGACAAGTATTTTAAGTACAATCGGGTCCGCCAATCTACAAAAATCGATTACGCGGAGCCTGAAAAAGTGTACGATATTATATATGCAGTTCGGAAAAGGCCTATCCTATGGGATCAACGCCTGATTTGTCATCGGAATTCGAATTTGTCTCGCCGTGCTTGGGATCAACTCGACTTGGAACTTGGAATAGATGAAGAGTATCCATTGGCTCGGCGTAAACAAATCTGGAAGAGTAAAAGAGATTATTTCGTATCAGCGGTGAACGCCGCCAATCTGAGAAAATGGATTTATGCAGATGCATTAGAGTTCTACCGTCCAATGATA…	SMYIPSITADMLKNDGNDLTVQTRSDKYFKYNRVRQSTKIDYAEPEKVYDIIYAVRKRPILWDQRLICHRNSNLSRRAWDQLDLELGIDEEYPLARRKQIWKSKRDYFVSAVNAANLRKWIYADALEFYRPMINFRTTFCLRPTVAQPSQSVHDKLVLADKNIQCTPGDKKNVLTFLLK	Z003_3740	Caenorhabditis_elegans	C46F11.3	MADF_DNA_bdg	MADF_DNA_bdg
9	14A01	pTH8988	TGTCACGGACCTACGGCGCGCCTCGACGGTAGTATCGGAGGG	TAGTGCACCACAATCCTGCAGGTATAACACACTTTTGCATCGGTTTTTA	TCGACGGTAGTATCGGAGGGAAGGAATGATGGGAATAACCGATATTCACCACAAGATGAAGTTGAAGATAGGCTGCCAGATGTAGTTGACAATAGGCTTACTGAGAACATGAGAGTTCCTTCCTTCGAGAGGCTCCCGTCACCAACACCTCGATACTTTGGCTCATGCAAATGGTTTAATGTGTCGAAAGGATATGGTTTTGTGATCGATGACATCACCGGTGAAGATCTATTCGTTCATCAGTCTAATCTCAATATGCAAGGATTTCGGAGTCTTGATGAAGGAGAACGTGTATCATACTACATTCAAGAGCGATCGAATGGAAAAGGTAGAGAAGCTTATGCGGTATCAGGAGAAGTAGAAGGACAAGGACTGAAAGGAAGCCGAATTCATCCATTG…	STVVSEGRNDGNNRYSPQDEVEDRLPDVVDNRLTENMRVPSFERLPSPTPRYFGSCKWFNVSKGYGFVIDDITGEDLFVHQSNLNMQGFRSLDEGERVSYYIQERSNGKGREAYAVSGEVEGQGLKGSRIHPLGRKKAVSLRCFRCGKFATHKAKSCPNVKTDAKVCYT	Z003_4923	Caenorhabditis_elegans	F02E9.2	CSD	CSD
10	14B10	pTH8989	TGTCACGGACCTACGGCGCGCCATCGAAGTTCCCGACGCTAG	TAGTGCACCACAATCCTGCAGGTGTTCATCGGAGGCGGACG	ATCGAAGTTCCCGACGCTAGTGCGCCGCCAAACAAAATTGTAGAATATTTGATGTATTATAGAACGTTAAAAGAAAGTGAACTCATACAACTGAATGCGTATCGGACAAAACGAAATCGATTATCGTTGAACTTGGTCAAAAACAATATTGATCGAGAGTTCGACCAAAAAGCTTGCGAGTCCCTGGTGAAAAAATTGAAGGATAAGAAGAATGATCTCCAGAACCTGATTGATGTGGTTCTTTCAAAAGGTACAAAATATACCGGTTGCATTACAATTCCAAGGACACTTGATGGCCGGTTACAGGTCCACGGAAGAAAAGGTTTCCCTCACGTAGTCTATGGCAAACTGTGGAGGTTTAATGAAATGACAAAAAACGAAACGCGTCATGTGGACCAC…	IEVPDASAPPNKIVEYLMYYRTLKESELIQLNAYRTKRNRLSLNLVKNNIDREFDQKACESLVKKLKDKKNDLQNLIDVVLSKGTKYTGCITIPRTLDGRLQVHGRKGFPHVVYGKLWRFNEMTKNETRHVDHCKHAFEMKSDMVCVNPYHYEIVIGTMIVGQRDHDNRDMPPPHQRYHTPGRQDPVDDMSRFIPPASIRPPPMNM	Z003_6525	Caenorhabditis_elegans	F25E2.5	MH1	MH1
11	14C06	pTH8990	TGTCACGGACCTACGGCGCGCCAATCTCTTTCCAAATGATGATACATCT	TAGTGCACCACAATCCTGCAGGTACTGTAAGCTTGATTGAAGTCGAG	AATCTCTTTCCAAATGATGATACATCTTCTGGAAAGCTTTTTGATTACTTCTTGACAAACACTGAGCGAGAAAACGAATCAGAAAATAATATTCCTCATCCATACAACAAAGCTGTTTTTCCAACATTTGGTGTTCCTGTGTCATCAGATGGAAATGTCGTTGCTGAAGTTGTAGATGGAAGGCTTCCAGCTGTTGGAACTCGTTCGAAGTATGATCTCACTGTTGATGAGCTCAGAAGACGCTGTGGAGCTCCAGAGCATATGAATCAATCCGCCTTATACTGCTTTTTCAGAAAATCGAAAAAGAAGGAAGCCATAAATCGAGTGAAGAAGGTGCTCACCGACTACAATATTACTGTGAGAACAATGCAGAGGCAACGAAAAGTGACATGTTTCTCT…	NLFPNDDTSSGKLFDYFLTNTERENESENNIPHPYNKAVFPTFGVPVSSDGNVVAEVVDGRLPAVGTRSKYDLTVDELRRRCGAPEHMNQSALYCFFRKSKKKEAINRVKKVLTDYNITVRTMQRQRKVTCFSPFLEEEATALARDLDSITEEFLPIDAIALEMLEKLIFNNKNLDICLRILKNTNKTITRVIKTLEVRQPKITGQKEKLKGNSLDLSYHNFSLTTHGFGHPNSLSHYRSYQKIVEQAALYCEKMQKGASLPSKEYLIPGQKPFENMSNEFFVEWRMRSYHKKARKEMLDFNQAYSR	Z003_6822	Caenorhabditis_elegans	F28C6.1	TF_AP-2	TF_AP-2
12	14C12	pTH8991	TGTCACGGACCTACGGCGCGCCATGGCCGAGAAAAACGACG	TAGTGCACCACAATCCTGCAGGCACCTTCCTCGGCGTCTCT	ATGGCCGAGAAAAACGACGTGGCAGAGCAACCAGCTGACAAGCCAGTGAAGGCTACAAAAGTGAAGGGAACAGTGAAATGGTTCAACGTTAAGAACGGATACGGATTCATCAACCGCACTGACACCAACGAAGACATCTTCGTCCATCAGACCGCCATCATCAACAACAACCCGAACAAGTACTTGAGAAGTCTTGGAGACAATGAAGAGGTCATGTTCGACATTGTCGAAGGATCCAAGGGTCTCGAAGCGGCCAGCGTAACAGGACCAGATGGAGGACCAGTTCAAGGATCCAAGTATGCTGCCGATCGTGATGCTGAAAATGCAGCACGTGGACGTGGTGGACGCGGACGTGGACGACGTGGAGGACGTGGTGGAATCCGACACGACTCTGGATCA…	MAEKNDVAEQPADKPVKATKVKGTVKWFNVKNGYGFINRTDTNEDIFVHQTAIINNNPNKYLRSLGDNEEVMFDIVEGSKGLEAASVTGPDGGPVQGSKYAADRDAENAARGRGGRGRGRRGGRGGIRHDSGSRDAEEGG	Z003_7164	Caenorhabditis_elegans	F33A8.3	CSD	CSD
13	15B02	pTH8992	TGTCACGGACCTACGGCGCGCCCAACAAGGGACTGGAGGAAGT	TAGTGCACCACAATCCTGCAGGTCCAGACATTTTGAGAACAACATCG	CAACAAGGGACTGGAGGAAGTGGAGAGGAAGATTACTGTATTCCTAAATCAGAAGATAGAGATCACTCATCTAATTACAGTCAAGTTGCCACAAAACAGGATCGTCCATTCGTTTTCTTTGCTTCTGACTGTCAATCTCCCCTTGAAATTGTTGGTGAAGTCTACTGCACTGTTCCAGGACGCACAAGTCTCTTAAGCTCTACAACTAAATATCGGGTTACTGTAGCAGAAATACAAAGACGCATCAGCCCGCCAGAATGCTTAAATGCGTCTCTTCTTGGTGGTATTTTGAGAAAGGCTAAGTCAAAGGACGGTGGGAAAACATTGAGGGATTCTCTCAAGAAACTTGGTTTGACTCTTCCTGCTGGTAGAAGGAAGCAAGCAAATGTTACAGCTTGG…	QQGTGGSGEEDYCIPKSEDRDHSSNYSQVATKQDRPFVFFASDCQSPLEIVGEVYCTVPGRTSLLSSTTKYRVTVAEIQRRISPPECLNASLLGGILRKAKSKDGGKTLRDSLKKLGLTLPAGRRKQANVTAWTALVEEEAIHMAKEFALVCEKEFHSREIGIYLTKTSLAIDPDVVKRRTALEMSRKVVGELAELLSCDRTPLTPYFPRNMLPIDPSVQQHLSHFTLMTHGFGNVAMSAVLESVKLMIDESIKYIDRCCSQNVWR	Z003_10770	Caenorhabditis_elegans	K06A1.1	TF_AP-2	TF_AP-2
14	15B10	pTH8993	TGTCACGGACCTACGGCGCGCCTCAACAGTGGTTGCCAATCC	TAGTGCACCACAATCCTGCAGGAAAGATGAATAGTAAAGGCTCCCC	TCAACAGTGGTTGCCAATCCGATGACCAACTATCAATTGGCATTTCAAGCGAAACTCGGAAGTCTTCACAGTTTGATTGGAGATTCTGTTCAATCGTTAACAAGCGATCGAATGATTGATTTCTTGTCAAACAAGGAGAAGTACGAATGCGTCATATCGATTTTCCATGCCAAAGTTGCCCAAAAGTCATATGGAAATGAGAAAAGATTCTTCTGCCCACCACCATGCATTTATCTTATTGGCCAAGGCTGGAAACTCAAAAAGGATCGTGTCGCTCAACTGTACAAAACACTCAAAGCTTCAGCTCAAAAGGATGCTGCAATCGAGAATGATCCGATTCACGAGCAACAAGCCACAGAACTCGTCGCCTACATTGGAATCGGATCAGACACTTCCGAG…	STVVANPMTNYQLAFQAKLGSLHSLIGDSVQSLTSDRMIDFLSNKEKYECVISIFHAKVAQKSYGNEKRFFCPPPCIYLIGQGWKLKKDRVAQLYKTLKASAQKDAAIENDPIHEQQATELVAYIGIGSDTSERQQLDFSTGKVRHPGDQRQDPNIYDYCAAKTLYISDSDKRKYFDLNAQFFYGCGMEIGGFVSQRIKVISKPSKKKQSMKNTDCKYLCIASGTKVALFNRLRSQTVSTRYLHVEGNAFHASSTKWGAFTIHLF	Z003_10981	Caenorhabditis_elegans	K08B4.1	LAG1-DNAbind	LAG1-DNAbind
15	15D01	pTH8994	TGTCACGGACCTACGGCGCGCCATGGACGATTTTCCTTCACCAG	TAGTGCACCACAATCCTGCAGGCATTTGGCACATCCCAACTTG	ATGGACGATTTTCCTTCACCAGAACCTACTGATCCCAGACTTGAGGCAATGGCTCAAAAAGTGTTAGAAGAAACTATTATCACTGAAGGAGATGGAACAATCTACTGGGCTCTCAAAGTTACCCGATTACTCTCTAGAGTAGCTAAAAAACACCAGTGCTTTGAAGCTTTCTACGATGCCGTTATTAAAGGTGATCCAAAAACACGATGCTGTCCTGCACACAATGAGAAACTCATTGGAAACTTTGGACGAGCTATCATGTGTGTCTTGAGAGCATTCAGATTTCCGGTTATTCGATATGAATCTCAAGTGAAATCAATATTAACGTGTCGACATGCATTCAATTCCCATAGTCGGAATGTTTGTCTGAATCCGTATCATTATCGATGGGTTGAACTA…	MDDFPSPEPTDPRLEAMAQKVLEETIITEGDGTIYWALKVTRLLSRVAKKHQCFEAFYDAVIKGDPKTRCCPAHNEKLIGNFGRAIMCVLRAFRFPVIRYESQVKSILTCRHAFNSHSRNVCLNPYHYRWVELPTCQVPPIIVNKELDYGEPPIRTEDALDDWNQKDLKEEQVVASWDVPNV	Z003_11999	Caenorhabditis_elegans	R05D11.1	MH1	MH1
16	15E02	pTH8995	TGTCACGGACCTACGGCGCGCCGGCGGAGCATCTTCAAACG	TAGTGCACCACAATCCTGCAGGGCATTGAATCATCATCATACAAATCGT	GGCGGAGCATCTTCAAACGGGTCGACAGCAATGCTTCATACTCCAGATGGAAGCAATTCTCATCAGACATCGTTTCCTTCGGATTTCAGAATGTCCGAATCGCCAGACGATACCGTATCGGGAAAAAAGACAACGACCAGACGGAACGCTTGGGGAAATATGTCATATGCTGAACTTATCACTACAGCCATTATGGCTAGTCCAGAGAAACGGTTAACTCTTGCACAAGTTTACGAATGGATGGTCCAGAATGTTCCATACTTCAGGGATAAGGGAGATTCGAACAGTTCAGCTGGATGGAAGAACTCGATCCGTCACAATCTGTCTCTTCATTCTCGTTTCATGCGAATTCAGAATGAAGGAGCCGGAAAGAGCTCGTGGTGGGTTATTAATCCAGAT…	GGASSNGSTAMLHTPDGSNSHQTSFPSDFRMSESPDDTVSGKKTTTRRNAWGNMSYAELITTAIMASPEKRLTLAQVYEWMVQNVPYFRDKGDSNSSAGWKNSIRHNLSLHSRFMRIQNEGAGKSSWWVINPDAKPGRNPRRTRERSNTIETTTKAQLEKSRRGAKKRIKERALMGSLHSTLNGNSIAGSIQTISHDLYDDDSMQ	Z003_12617	Caenorhabditis_elegans	R13H8.1	Fork_head	Fork_head
17	15D10	pTH8996	TGTCACGGACCTACGGCGCGCCACATCATCACAAGCTTCATCCC	TAGTGCACCACAATCCTGCAGGGTGCAAATCCTCCATTAAAATTGTTAT	ACATCATCACAAGCTTCATCCCAACCTCCACCTACACCTACAGTCAATCCAACACCGATTCCACCGAATGCTGGAGCAGTTCTCACAACTGCAATGGATTCATGTCAGCAGATTTCACATGTTTTACAATGTTATCAGCAGGGTGGAGAGGACAGTGATTTTGTACGGAAAGCCATCGAATCTCTTGTCAAAAAATTGAAAGACAAACGAATTGAATTGGATGCATTGATTACAGCAGTTACTTCAAATGGAAAACAACCAACTGGATGTGTTACTATTCAGAGATCCTTGGATGGACGCCTTCAAGTTGCTGGACGGAAAGGTGTTCCACATGTAGTTTACGCAAGAATATGGAGATGGCCAAAAGTTAGCAAAAATGAACTTGTGAAATTAGTTCAA…	TSSQASSQPPPTPTVNPTPIPPNAGAVLTTAMDSCQQISHVLQCYQQGGEDSDFVRKAIESLVKKLKDKRIELDALITAVTSNGKQPTGCVTIQRSLDGRLQVAGRKGVPHVVYARIWRWPKVSKNELVKLVQCQTSSDHPDNICINPYHYERVVSNRITSADQSLHVENSPMKSEYLGDAGVIDSCSDWPNTPPDNNFNGGFAP	Z003_12515	Caenorhabditis_elegans	R12B2.1	MH1	MH1
18	16C06	pTH8997	TGTCACGGACCTACGGCGCGCCATGTCAGACGTTGCTGAAGAGA	TAGTGCACCACAATCCTGCAGGCTGAGCCATCGAAGAAGGCA	ATGTCAGACGTTGCTGAAGAGAAAGCCGAATTCCTCGTCATTCGCACATATGGATCGGAGTCTTTCCGCAAAGAATGTGCTGATCTCATTGAAAAAGAGCTGCACAAATTAAATGCAACAATCGCTCGCGTCCCGGTGGGGGAGTTTGTCGCTTACGCGGAGAACGCTGTCAAAAATGAGACGGATTCCGAAGCTGTTGGCTCATCGTCGGTCAAACGTGAAAACTCGGCAAATGATTCGCCCGCTAACACCAATGACGTCGACATTGTCTCGTCACCGGTCAAGAGAGGACGTGGGCGCAAAGCAAAGAATCCGTCCGCTGACGCGGATGTCAACGACACCGGCTCATCACCAGTCAAGAAGGGACGTGGTCGCCCAATAAAGAATCCTTCAGCTGAT…	MSDVAEEKAEFLVIRTYGSESFRKECADLIEKELHKLNATIARVPVGEFVAYAENAVKNETDSEAVGSSSVKRENSANDSPANTNDVDIVSSPVKRGRGRKAKNPSADADVNDTGSSPVKKGRGRPIKNPSADAGSPLVKKGRGRRAQTPAADTDAIDTASSPVKKGRGRPAKNPSADAGSPLVKKGRGRQAKNLAADTDAIDTASSPVKKGRGRPLKKTAAEADVNGLGSPSANRITGCPPSTKVSNQSSPPEPAVNESEEADEPVLKRGRSVKQPKDESESDDEDAEKAPAAIPKKRGRPGKSAIDAFFDGSD	Z003_16046	Caenorhabditis_elegans	Y17G7A.1	AT_hook	AT_hook
19	16E11	pTH8998	TGTCACGGACCTACGGCGCGCCATGCTCACCGAGGATCCCG	TAGTGCACCACAATCCTGCAGGATGGACTTGCTGATGTTCCAATTAT	ATGCTCACCGAGGATCCCGTATCGGAGATTTGTGAGGCGAAAGCAGTCGATGAGCTCGCCGAGCAAGAAAAAAATTATTATTGTCAGAGATGTTTAAATCATGGGGAGTTGAAGCCAAGGAAAGGTCACAAGCCGGATTGTAGATATCTAAAATGTCCATGTCGAGAATGCACGATGGTCGAGCAGCGAAGACAGTTGAACAATTTGCTAAGCAAAAAGAAGATCCACTGCACACCGGCAACTCAAACCCGTGATGGGAAGCGTGTCCGTGACCCACACTGTGCTCGGTGCTCGGCTCACGGAGTCCTAGTCCCATTGCGGGGACACAAGCGGACAATGTGCCAATTTGTGACATGCGAGTGTACATTGTGTACTCTTGTGGAACACCGTCGAAATCTT…	MLTEDPVSEICEAKAVDELAEQEKNYYCQRCLNHGELKPRKGHKPDCRYLKCPCRECTMVEQRRQLNNLLSKKKIHCTPATQTRDGKRVRDPHCARCSAHGVLVPLRGHKRTMCQFVTCECTLCTLVEHRRNLMAAQIKLRRSQQKSRDGKEPKRNSRRKSKDMDMEMMVVTATDGQKIIGTSASPS	Z003_17648	Caenorhabditis_elegans	Y53C12B.5	DM	DM
20	16G01	pTH8999	TGTCACGGACCTACGGCGCGCCATGCAAGTCTTTGTTCCAGTTCA	TAGTGCACCACAATCCTGCAGGCACTGGAATAGGTCACTAGAGTACC	ATGCAAGTCTTTGTTCCAGTTCAAACCACCGCCGAGATCGTCCTTGTTGACGTGACAGCCGCCCAAAAGAAAGCCATGAAAAAACTGACATGTCGAAAGTGCGAAGGTCACGGAACGTATGCGATCTTGAAAGGACACGCCGGTGTGTGCCCGTACAAGGATTGCTCGTGTGGAACGTGCGCTTCTGTGATGAGCATGCGAGCCAACGCGTTGATCCGAAGGTTCCGTCATCGTCAGCCAGATCAGTCGATGGCTGTTGTGAAGGCTCTCCGATCAAAGAATGGAAATATGCGCCTACGAATCGTGCCTAGAAATGACGAGGAGACTGTTGTAGAGAATGATGGTACTCTAGTGACCTATTCCAGTG	MQVFVPVQTTAEIVLVDVTAAQKKAMKKLTCRKCEGHGTYAILKGHAGVCPYKDCSCGTCASVMSMRANALIRRFRHRQPDQSMAVVKALRSKNGNMRLRIVPRNDEETVVENDGTLVTYSSD	Z003_18360	Caenorhabditis_elegans	Y67D8A.3	DM	DM
21	16H11	pTH9000	TGTCACGGACCTACGGCGCGCCATGATAAACTTCGACGGAATAAAAAAG	TAGTGCACCACAATCCTGCAGGTAAAATTAACGTTTGCCATATTGACAT	ATGATAAACTTCGACGGAATAAAAAAGATCACGGAGAGACTGAAATGGAAACAAGGAGACGAGGATGAGAATTGGGCAAAAAAGGCGATCGACAACTTGATGAAGAAGCTGATAAAGCATAACAAGCAGGCGTTGGAAAATTTGGAATTCGCGTTGAGGTGCCAAGGACAACAAAAAACCGAATGCGTGACAATTCCGCGGTCACTAGATGGACGACTTCAAATTTCGCATCGAAAGGCACTTCCTCATGTGATATATTGCCGTGTCTATCGTTGGCCAGATCTTCAATCACATCATGAATTGAAAGCAATTGAAGATTGCCGATTCTGCTACGAATCAGGGCAAAAGGATATTTGCATTAATCCATATCATTACAAAAGAGTTCATGCAACTGGAGTA…	MINFDGIKKITERLKWKQGDEDENWAKKAIDNLMKKLIKHNKQALENLEFALRCQGQQKTECVTIPRSLDGRLQISHRKALPHVIYCRVYRWPDLQSHHELKAIEDCRFCYESGQKDICINPYHYKRVHATGVLPPVLVPRYSEKPPQEVPPTLAKFQLMEMSGSRMPQNVNMANVNFT	Z003_19729	Caenorhabditis_elegans	ZK370.2	MH1	MH1
22	13E08	pTH9043	TGTCACGGACCTACGGCGCGCCACATCGTCTAACTCGGTTGCC	TAGTGCACCACAATCCTGCAGGACTGTTGATCTGTGTTTGGACG	ACATCGTCTAACTCGGTTGCCACGTCACAACAATTACAACATCATCCATATGGGACAGCAGCTGGAGGCTATAAGCATGCACAACAAGCGATTCCCAAATCAGTGACCCCGTATTCGGATGCAACAAATTGCAAAAAGTCATCAAATCACATCAAGCGACCAATGAACGCTTTTATGGTTTGGTCTCAAATGGAACGGAGAAAGATTTGTGAGCATCAGCCAGATATGCATAATGCAGAAATCAGTAAGCAATTGGGAAGTCGTTGGAGAAGTTTGACTGATGAGGAAAAAGCTCCATTTGTTGCTGAAGCTGAGAGACTCAGAGTTTGTCATATGCAGGAATATCCAGACTACAAATACAAGCCACGCAAGAAGCCAAAGAAGAATCCAGATGGAACA…	TSSNSVATSQQLQHHPYGTAAGGYKHAQQAIPKSVTPYSDATNCKKSSNHIKRPMNAFMVWSQMERRKICEHQPDMHNAEISKQLGSRWRSLTDEEKAPFVAEAERLRVCHMQEYPDYKYKPRKKPKKNPDGTLQQPAQPQAPQQQQAPPRGASPQARQRKRPNTDQQS	Z003_2862	Caenorhabditis_elegans	C32E12.5	Sox	HMG_box
23	14B01	pTH9044	TGTCACGGACCTACGGCGCGCCATGAAAAATTTGATTAATATATGTCCG	TAGTGCACCACAATCCTGCAGGATAGATCCACATATGGAAGGACTTGA	ATGAAAAATTTGATTAATATATGTCCGCGTCCATCAACATCAAATCATTTTTCAAATATTTCCTTGTCATCATCAGAGCCGCCTCCTCCAAGGAAGGACTGCCGAATTTGCTTTGAAAAAGGCCACGGCTACCATTTTGGAGTGTTCTCTTGCAGAGCTTGTGCTGCTTTTTTCCGACGTTGCCACTTCCTAAAAGAAAACCGTCGTAGATGTCGGCTATCCAAAGGAAAATGTGGACCGAATAAAAATGGAAAATGGTTTTGTAAAACTTGCCGATTGGAAAGGTGCTTTCGATTGGGGATGACTCCTTCAAATATCCAATATGACAGAGACGCCTATAAATCATCGGTGAAAAAAATAAAAGACAGTGCTGAAAACATCACCGAGCCAAAACGTGAT…	MKNLINICPRPSTSNHFSNISLSSSEPPPPRKDCRICFEKGHGYHFGVFSCRACAAFFRRCHFLKENRRRCRLSKGKCGPNKNGKWFCKTCRLERCFRLGMTPSNIQYDRDAYKSSVKKIKDSAENITEPKRDATSLILINKTSQVLPYVDLS	Z003_5860	Caenorhabditis_elegans	F16B4.1	zf-C4	zf-C4
24	14A02	pTH9047	TGTCACGGACCTACGGCGCGCCGTTGTTGCCCCAACAGTTGA	TAGTGCACCACAATCCTGCAGGATCGCGGAGTCACGTATCC	GTTGTTGCCCCAACAGTTGAAGCATATGTCGGAAGTTCAAGTGCTCAAACTCCAACAAAATCGAGTGGCGGTGCTTTGGATGGCAGTGATCAACAGGAAGTGCGTCAGGACGGAACTAGTGTGCAAAAAGATGACAACGGATTTGTATTCTACAAGTGTCGTTTCTGCGGACTCACATTCAACTTCATGAACACTCTCCGTGCACACGAGAGAATACATGACGTTTCACAGCCATATGTCTGTGGAAAATGCGGAGACTCATTTGAATTTGCTTGCCAACTGGAATATCATGCCGCTCAGCACTCAGAAATTGACGGGTACAAGTGTGAATGCGGAAGGACGTTCTTTTCTTACACGGAAATGTTATATCACAAGCACACGGACGATCCACTCGAATTG…	VVAPTVEAYVGSSSAQTPTKSSGGALDGSDQQEVRQDGTSVQKDDNGFVFYKCRFCGLTFNFMNTLRAHERIHDVSQPYVCGKCGDSFEFACQLEYHAAQHSEIDGYKCECGRTFFSYTEMLYHKHTDDPLELIGAPETTTIKVSKKRVLPVSEQDLPQPAFVTEGYEPKHPLRVYNDVRSKPYICEYCSKSYSDSRGLAYHMYSHRGEKYFNPRASRYMMGREGVGYTDSRSYYLFPRTSGYVTPRF	Z003_5075	Caenorhabditis_elegans	F08C6.7	zf-C2H2	zf-C2H2
25	14A06	pTH9048	TGTCACGGACCTACGGCGCGCCATGAGTTTGTCATCACTAGACGC	TAGTGCACCACAATCCTGCAGGTTCCTAGATTTATGCTCAATTTTTGAG	ATGAGTTTGTCATCACTAGACGCCGTATTGTCGCTTATTGCAACCTCTTCCACTTTGGATCAGGATTCTGCTAAGGTGCCCCAGTGTCAAGTTTGCAAAAGAAAGTTCGCGAATCAGAAAACGCTGAGAACGCACATGAAGCACATTACGTGTAGGCCTGGACGTTCCAATGTGGTCAATCACAAATTCAGATGTGAAAATTGTGAGAAACAATTCACCAACAAGCCAAACTTGAAGCGTCATCAAATAACTCACTCTGGTTCAAAATCCAAGAAGTGCAGCACTTGCCAGAGAACATTCTTCAGGGAAGATCAGCTTCAAAGGCACCTGCACAACCATCTCAAGGAAAGATCACATTTCGACTGTCCCGTGTTGAACTGTTCAATGCAGTTCGTATTC…	MSLSSLDAVLSLIATSSTLDQDSAKVPQCQVCKRKFANQKTLRTHMKHITCRPGRSNVVNHKFRCENCEKQFTNKPNLKRHQITHSGSKSKKCSTCQRTFFREDQLQRHLHNHLKERSHFDCPVLNCSMQFVFYEGVENHLVNHHHFSYSESAPCGKCHKLFGSPRHLLVHYHFDHKEALRSSAPAPTSSARLSPITVSTSGSPRAQLAISPQEKPPQKLSINLGT	Z003_5505	Caenorhabditis_elegans	F12E12.5	zf-C2H2	zf-C2H2
26	14A08	pTH9049	TGTCACGGACCTACGGCGCGCCCCATCAAACACTCTTGATGCTCT	TAGTGCACCACAATCCTGCAGGTGCACGGGGATAATGGAGAT	CCATCAAACACTCTTGATGCTCTTGTTGCTCGCAAAGCCGACGATCAACCATTTGAAAAGAGATATCTAAGTGAACAAGAAGCAATTGAAGGACCAGATGATGAGATTGAAATGAAAAAAATGGAATTGGATCCTGATGTATCTACACGCACCTGCTCTACCTGTGGTTACCAAGGAAAATGGGTGTCTGAGATGATTCGTCATAAGAGAGTTCATACCAGTGAAAGACCATTCAAGTGTCGTTATTGCTCCAGAACCAGCAAGTGGAAGGCTGACCTTATTCGACATGTTGCAAAAACTCATGGAATCCGTGTTGTCTCCAAATACAGCCGTTCGAAAGTCTTCGATGCCACCAACAGTTCAATGGATTCTTCGTGTTCTTCAGACTCTGATCGATGC…	PSNTLDALVARKADDQPFEKRYLSEQEAIEGPDDEIEMKKMELDPDVSTRTCSTCGYQGKWVSEMIRHKRVHTSERPFKCRYCSRTSKWKADLIRHVAKTHGIRVVSKYSRSKVFDATNSSMDSSCSSDSDRCIISEKRTVFYRCQLCSFEDERVSVLNSHVSHLHNTSPCVCRCGAKFEDVQGALAHSNGPCSHVDMIYNVMPTYEKASPLSPCR	Z003_5601	Caenorhabditis_elegans	F13G3.1	zf-C2H2	zf-C2H2
27	14B02	pTH9051	TGTCACGGACCTACGGCGCGCCATGTCTTCTCCGCCGTCAA	TAGTGCACCACAATCCTGCAGGGCTTTGGTTTTGTGATTGTAGGAG	ATGTCTTCTCCGCCGTCAACGTCGTCTCCCTCGTCGCCAAATTCTGGAACTAATTCCAGCGAGACCACTTGCAAAGTATGTGAGCTATCCGCACATGGTGTACACTTCGGAGTCACAAGTTGCAGGGCGTGTGCGGCTTTTTTCAGGCGAACAATTGTAATGTCGCGCACCAAGAAATACAGGTGTCGCGGAGGCATGAACAAGTGTATAGTCAACACCAACGACAGATATCAATGCAGACTGTGCAGGTTTAACAAATGCGTGACGCTGGGAATGACATCGGAAAATGTACAATGGAATCGAGATCCGTTTCCAGAAGGCAGAAAGAAAAGGGATGGAAGAGGAAGTGAAGACGAGGTCGATTTGAAACCAGTCAAGAGACCTACCTTCACTTCATCA…	MSSPPSTSSPSSPNSGTNSSETTCKVCELSAHGVHFGVTSCRACAAFFRRTIVMSRTKKYRCRGGMNKCIVNTNDRYQCRLCRFNKCVTLGMTSENVQWNRDPFPEGRKKRDGRGSEDEVDLKPVKRPTFTSSMLTPTITKPKR	Z003_5871	Caenorhabditis_elegans	F16B4.9	zf-C4	zf-C4
28	14B04	pTH9052	TGTCACGGACCTACGGCGCGCCTTTGAGCAAAACAATAACAATAGTGAA	TAGTGCACCACAATCCTGCAGGGTGAAGGAGTCTTTGGAATTTTTAATG	TTTGAGCAAAACAATAACAATAGTGAAAAGGCAGAGTCATGCTCATCGCGAGACAGTAGTCATGATTCATCATCCCCGACATCAACTGGAGGAAGCAGTCGGGATAACGTCATTGTCAGAAATGAATTGAAACGGAAAAAGGATCAAGTGAAAGATGTAGCATATTGGGAACGACGACGAAAGAATAATGATGCTGCGAAACGAAGTCGTGATCAAAGAAGAATGAAAGAAGATGAAATGGCTCATAGAGCAACAAGTCTAGAACGTGAAAATATGTTGCTCCGTGTAGAATTAGATCAACTGAGAGCAGAAACTGATAAGCTAAGAGCACTGATTTTGACGACACCTACAACGTCTATTAGTATTCCAATTCCTCTACAATCTTTACCACTTCTCACT…	FEQNNNNSEKAESCSSRDSSHDSSSPTSTGGSSRDNVIVRNELKRKKDQVKDVAYWERRRKNNDAAKRSRDQRRMKEDEMAHRATSLERENMLLRVELDQLRAETDKLRALILTTPTTSISIPIPLQSLPLLTAQTAPASSVITTSQMYAPLPLKIPKTPSP	Z003_5932	Caenorhabditis_elegans	F17A9.3	bZIP_1	bZIP_1
29	14B06	pTH9053	TGTCACGGACCTACGGCGCGCCAACCCCAGCTCACCTCCAT	TAGTGCACCACAATCCTGCAGGGCTCCAGCTCGCCGCGTTG	AACCCCAGCTCACCTCCATCAATTCCAGCCACGTCGCCGCAACTACCACTTGCTGAATCTGAAAATGTGCCGGAAAGCTCCTCAACTCTGAAAGACCACAAATTCTCGCTGAACACGATGCTTTTCAATGTGAAGAAGAATGACGCGGTGAAGATCTCGCTGGCAAATCAAGAACAATGGGCAAAATTTCACGAAATCGGGACAGAGATGATGGTGTTCAATTCTGGAAGACGTCTATTCCCACTCCTCGCGTACAAAGTCTCCGGACTGGATCCCCACAAGTTGTACTGCGCTGGAGTTCATATGATCCCGGACTCGGCTTACAAGCAAGAGTATGATCACGACCTGCAACAATGGGTGAACTGTTTGAACCAGAAAAAGACGATTTTCAAGCCGACC…	NPSSPPSIPATSPQLPLAESENVPESSSTLKDHKFSLNTMLFNVKKNDAVKISLANQEQWAKFHEIGTEMMVFNSGRRLFPLLAYKVSGLDPHKLYCAGVHMIPDSAYKQEYDHDLQQWVNCLNQKKTIFKPTSEILGRIENGFKLMSLGIDMSDVKIFNIAIRKKTPLQIEKSRKPNLDKTIEVLIQYKYLPVIKIYELSNSGMEKKEIAQATFPETSFVTVSIYRNQKIKEMKTLGNKYCRTDRKQIVMEQRGELEQ	Z003_6068	Caenorhabditis_elegans	F19B10.9	T-box	T-box
30	14B07	pTH9054	TGTCACGGACCTACGGCGCGCCATGCCGTTGCCTATGAATTCAG	TAGTGCACCACAATCCTGCAGGACCTTTCTATTGAAAATGGCAATGG	ATGCCGTTGCCTATGAATTCAGGCGAAAAGGTAAAAGCGGTGGGACGATCATATAATCCGGGTCGACCACTTTGTCTCGAAGATCGGAAGAAAATTGTCAGGCTGTATGAGGAAGGTTGTCGTGTTAGCCACATTGCTCGTCTCATTGGAGTTACACACAGTTGTGTAAGTAAGATAATGTCAAGATATCGACGAACAGGAAGTGTCCAACCGAGAAGCTTCCGTGCAACTGAGAACCAAGAAAATGACAATGCAACGTGGCAGCAACAGCAGCTGAAGCAACAACAAAAGAAGGAAAAGCCATTGCCATTTTCAATAGAAAGGT	MPLPMNSGEKVKAVGRSYNPGRPLCLEDRKKIVRLYEEGCRVSHIARLIGVTHSCVSKIMSRYRRTGSVQPRSFRATENQENDNATWQQQQLKQQQKKEKPLPFSIERF	Z003_6236	Caenorhabditis_elegans	F21D12.5	PAX,CENP-B_N	CENP-B_N
31	14B09	pTH9055	TGTCACGGACCTACGGCGCGCCATGGCATTCGATCCAACATGG	TAGTGCACCACAATCCTGCAGGAGAGAAGTTCGTATTTGTATGGCAG	ATGGCATTCGATCCAACATGGCAAATGCATCCAGCGTACGCAACTGCAACTGCTTTTAATCCATACAATGTATCATTCGACTTCACACGCTCTCCAAATACCTCCGGCGGATCCGATGAATCAATGAGTGATGGCAGCAAGATCGACCCAAAACGATCTCCAAAATATCTTGAAAAGCGTATGAAGAATAATGAGGCTGCAAAGAAGTCACGAGCCTCCAGAAAACATCGAGAGCAGAAGAATCAGACAGAGAATGAGTTACTCAAAAGGAAAAACGCAGCATTAGAGGAAGAACTGAAGCAAGCAAAATGTGAATTGGCTCAGATGCAAATCACGATCCGAGATATGTCTATCGAACGAGAAGCATACCGCCGAGAGAACGAAATGCTGAAAATGGTG…	MAFDPTWQMHPAYATATAFNPYNVSFDFTRSPNTSGGSDESMSDGSKIDPKRSPKYLEKRMKNNEAAKKSRASRKHREQKNQTENELLKRKNAALEEELKQAKCELAQMQITIRDMSIEREAYRRENEMLKMVNNKFADSKFEPPQPLRDMTNCNLPYKYELLS	Z003_6457	Caenorhabditis_elegans	F23F12.9	bZIP_1	bZIP_1
32	14C02	pTH9057	TGTCACGGACCTACGGCGCGCCACTGCTCCAAACAATTCGCAT	TAGTGCACCACAATCCTGCAGGTCAATAAAATGTTTTTAACGTCAGTAT	ACTGCTCCAAACAATTCGCATCGTACAATTAAAGCTGAAAACTACTTTAATGAGGATGAGGAAGATTACAATGAGAACTCGCATGAAGATTCGGAAGATTCAAAAGAAGACAGTGATGGACAAGGATGTAGATCAAGAAAAAGAAAAGAGAAACCACCATTTTCTTATATTGCTTTGATTGCTATGGCTATTTCAAAGCGTCCGGACAAAAAGGCAACATTGGCTGAAATTTACAGTTATCTTCAGGAAAACTTTGAATTTTTTCGTGGAGAATACGCTGGATGGCGGAACTCTATTCGCCACAATTTGAGCTTAAACGAATGCTTCGTTAAGTTGCCAAAAGATACTGGAGAGAGTTATCGTGGTCGTAAGGGTCATAAGTGGACAATCAGTGATTCA…	TAPNNSHRTIKAENYFNEDEEDYNENSHEDSEDSKEDSDGQGCRSRKRKEKPPFSYIALIAMAISKRPDKKATLAEIYSYLQENFEFFRGEYAGWRNSIRHNLSLNECFVKLPKDTGESYRGRKGHKWTISDSCEFMLEENGFRRRPRGYKARKRTHFPGVTASNEMGIGGATFDYPSSTTELTDSGTSSLNTDVKNILLN	Z003_6619	Caenorhabditis_elegans	F26B1.7	Fork_head	Fork_head
33	14C10	pTH9058	TGTCACGGACCTACGGCGCGCCTGCACATTACGAGTCGACCA	TAGTGCACCACAATCCTGCAGGCGGCGTCTCGAATCAGAAG	TGCACATTACGAGTCGACCAAACCATTCATGTCAAATGCTTTGAATGTCCTCTGCGAATTTGTATCCTCTGTTTCCAATGCGGCGCGGAATCACCACCACATCGCCGAGGTCACAATTACGAGCTTGTCAAGCCAACAAGTAATCCCGAAGCAATGAGCTGGACACACGAAGATGAATTCGAATTGTTAAAAGCTGCTCATAAATTCAAGATGGGAAATTGGGGAGAAATAGCTGAAAGTATTGGTCGCGGAAGAAAAGATGGTCATAATTGCAAGGATTACTTTGAAAAACATTTCGTGCGTGGATGGATTGGACAATTTTCCATAAAAAGTTCAAGTTGGGATCGAATTAAATATGGGATGTATATAAATCAAACATTAGACAGTGTGCTACAAAAA…	CTLRVDQTIHVKCFECPLRICILCFQCGAESPPHRRGHNYELVKPTSNPEAMSWTHEDEFELLKAAHKFKMGNWGEIAESIGRGRKDGHNCKDYFEKHFVRGWIGQFSIKSSSWDRIKYGMYINQTLDSVLQKNCLESTERMLLIRDAV	Z003_7060	Caenorhabditis_elegans	F32A5.1	Myb_DNA-binding	Myb_DNA-binding
34	14D06	pTH9059	TGTCACGGACCTACGGCGCGCCATGGATACTTCCGATCACAAGC	TAGTGCACCACAATCCTGCAGGAATTGGAAGTCGACGGCGA	ATGGATACTTCCGATCACAAGCCCCTTATCGACCGCTTCGAAACGGAATTCGCTGAAAAATCGTCACTGCTTCGCAAAGAAGAAAGCGAGCTTAAGCGGCCGGATCTCAGAGGCGATTTCCTCTGCTTGTCCTGCGGCCAAAACTTCAAGCACGGCGCTTCTCTCAACCGCCATCGTAAACTGGTGCATAGCGACGAGTACACCTGCATGCTGTGCGCCCGTAAGCTCTACCTGAAGGAGACCGTCCGTGATCACATGAGAAATGAGCACTACTTGGGTCAAGTATACACCTGCGGATGCTGTAACTGGACGTTTTCCAACAAAAAAGCCCTCACCGAACACGCAAAGGCCATACAGGAAACCGGAGCTCCAGGAGACGCCAACCCGATTGCGAAATCC…	MDTSDHKPLIDRFETEFAEKSSLLRKEESELKRPDLRGDFLCLSCGQNFKHGASLNRHRKLVHSDEYTCMLCARKLYLKETVRDHMRNEHYLGQVYTCGCCNWTFSNKKALTEHAKAIQETGAPGDANPIAKSGNSPGSLLKSPIQRAGFKLNRLLNKSLSPSTSNS	Z003_7462	Caenorhabditis_elegans	F36F12.8	zf-C2H2	zf-C2H2
35	14D07	pTH9060	TGTCACGGACCTACGGCGCGCCACAATCGGATATGTGGCTGAAAG	TAGTGCACCACAATCCTGCAGGTACGCAACTGTTGAAACGGAG	ACAATCGGATATGTGGCTGAAAGACCGAAGGATGTTCCACCGAAAGAGGCTGAAAAACGACAGGCCGAGGAGCAGAAACTGATAAACAATGCTCGACCATTGACTGACAAGGAACAAGAAGAAAAAGCTGAGCTTTTGACTCAGTCTGTCACAGACTGGACAAAACGCGAGTTCCAACAGTTTGTTAGAGGAAATGAAAAGTATGGTCGTGAAGATTTGGAGAGTATCGCGAAGGAAATGGAACGTCCACTTGAAGAGATTCAATCTTACGCTAAAGTTTTCTGGGAACGTATCGAAGAGCTTCAGGACTCTGAAAAAGTGCTCAGTCAAATTGAGAAGGGCGAGGCACGAATTCAACGAAAATATGCTGTGAAGAAGGCGCTTGACGCTAAAATAGCA…	TIGYVAERPKDVPPKEAEKRQAEEQKLINNARPLTDKEQEEKAELLTQSVTDWTKREFQQFVRGNEKYGREDLESIAKEMERPLEEIQSYAKVFWERIEELQDSEKVLSQIEKGEARIQRKYAVKKALDAKIAKYKAPFQQLRI	Z003_7544	Caenorhabditis_elegans	F37A4.8	Myb_DNA-binding	Myb_DNA-binding
36	14D09	pTH9061	TGTCACGGACCTACGGCGCGCCAGAGAGCTGTGCGAGAAGG	TAGTGCACCACAATCCTGCAGGTCTTATTTTTAACCATTTGAACGAGAT	AGAGAGCTGTGCGAGAAGGTCGAATCACTTTCAATTGCTTCTGAAATTCAAACTGCGCTAACAGATGCTGAAATTCTGAAGAAAGAAGCTGCTGGAGCAAAGGTCACAATCACTGAGGATAAGAACAAAGAAAATGAAAAGCAAGCCGACAAGGAGACATGGACTAGTGAAGAGATTCAATTATTGGTTAAGGCTTCAAACACATTCCCACCTGGAACCGTGGAGAGATGGGTTCAAATTGCCGATTACATTAACGAGCATCGCAAGGATTCTACGGGTTTACCACCAAAAACTGAAAAACAGGTTATCAAGCAATGCAAAGCTGTTCAAACGATGAACGTCAAGCTACCATCAACTACTCAAAATCAGCTAGGAACTGCGCTACCAGATGAGGATGTC…	RELCEKVESLSIASEIQTALTDAEILKKEAAGAKVTITEDKNKENEKQADKETWTSEEIQLLVKASNTFPPGTVERWVQIADYINEHRKDSTGLPPKTEKQVIKQCKAVQTMNVKLPSTTQNQLGTALPDEDVWSATEQKTLEDAIKKHKSSDPERWEKISTEVGTKSKKACIRRFKYLVQMVKNKK	Z003_7632	Caenorhabditis_elegans	F38A5.13	Myb_DNA-binding	Myb_DNA-binding
37	14D10	pTH9062	TGTCACGGACCTACGGCGCGCCAGCAATGGACGATCAAGCTC	TAGTGCACCACAATCCTGCAGGGAGAATAAGCACCAAGTGATGATGT	AGCAATGGACGATCAAGCTCGACGGTTGCTGCATCGCCAGCCGATAGGTCTTATTCTGGTGTAAGCGGAGGGCAAGGCCAAGAACTCACGATTCAGGAATTTGAAACTGTCACGGAAAAGATCAGAAGACATGGAACTTATGGACAATCGAAACCTCCATACTCTTACATTAGCTTAATTACTATGGCAATTCAAAAGTCTAATTCTAGACAATTGACATTGTCTGAAATCTACAATTGGATCATGGATTTGTTCCCTTACTATCAGAACAATCAACAAAGATGGCAAAACTCAATTCGCCACTCCCTCTCCTTCAATGATTGCTTTGTAAAGGTTGCCAGGTCCCCTGACAAGCCTGGAAAGGGATCCTTCTGGACTCTTCACGAGCACTGTGGGAAT…	SNGRSSSTVAASPADRSYSGVSGGQGQELTIQEFETVTEKIRRHGTYGQSKPPYSYISLITMAIQKSNSRQLTLSEIYNWIMDLFPYYQNNQQRWQNSIRHSLSFNDCFVKVARSPDKPGKGSFWTLHEHCGNMFENGCYLRRQKRFKVKEREPSRKKRNANSQQLHQQQHIPKMEIKEEDPTSITTTSSLGAYSL	Z003_7641	Caenorhabditis_elegans	F38A6.1	Fork_head	Fork_head
38	14E01	pTH9063	TGTCACGGACCTACGGCGCGCCATGCTAACATCGTTTCTGGATCC	TAGTGCACCACAATCCTGCAGGTGTTTGAATATTCTCCAGTATCACTTT	ATGCTAACATCGTTTCTGGATCCTCGACCATCATCCTCGTCATCATCCGTATCAACATCTTCTATGTCGTCATCACCATCCACGTCATCTGAGTCTTGCGCTGTTTGTGGCGATTCGGTTAATGGGAAACGGTACGGTGCGCCTGCCTGCCTCGGTTGTATCGTCTTTTTTCGTCGGGCCGTCATCAACAAGAGTCAGTACAAGTGCTGGAAGAAAGGGAACTGTGTCATCACCTTTGCGTCACGATGCGTCTGCCGATGCTGTCGATTACGAAAATGTTCCCATGTTGGAATGAAGCCGGAGGCTATTCAACGACGAGATCTTCTTGGACCACGCAAGCCAAAGACTATACTCACGAATGACATTAGCCAATCAATCGATGTTGCTCTCAATTTCCTG…	MLTSFLDPRPSSSSSSVSTSSMSSSPSTSSESCAVCGDSVNGKRYGAPACLGCIVFFRRAVINKSQYKCWKKGNCVITFASRCVCRCCRLRKCSHVGMKPEAIQRRDLLGPRKPKTILTNDISQSIDVALNFLSSPHSSCESDTGEYSNT	Z003_7703	Caenorhabditis_elegans	F38H12.3	zf-C4	zf-C4
39	14E05	pTH9064	TGTCACGGACCTACGGCGCGCCTCAAGCTTGTGCCAATTGAACT	TAGTGCACCACAATCCTGCAGGGATCATATGACTCGAACAAATTCAAAT	TCAAGCTTGTGCCAATTGAACTGGCTCATTGCCAAAGGTGGACTGAACACAGTACAAGAAATCGAAGTACCTGAAAACCCTAATATTGTTGGATCTCCAGTGGCTCCTGCACACGAAGGAAAACGGAGGAGAATTTTTGATGGAGCGGATAAGCCACCATATTCATACTCTCAACTTATTCGTCTAGCTATCGAAGATACTCCCGATAAAAAATGTACTCTTGCTGAAATCTACTCTTTCATTGCTCACAACTTTCAATTCTATCGTGAAAACCGGAATTCAAGTTGGAAGAATTCCATTCGCCATAATCTGTCATTAAATAAACAATTCAGCCGCATTGAGAAGACTGATGGAGATAGAAGAGGATGGTGGGTTTGTGTAGATCCGCCAGCCAAGAAA…	SSLCQLNWLIAKGGLNTVQEIEVPENPNIVGSPVAPAHEGKRRRIFDGADKPPYSYSQLIRLAIEDTPDKKCTLAEIYSFIAHNFQFYRENRNSSWKNSIRHNLSLNKQFSRIEKTDGDRRGWWVCVDPPAKKPRILKGSPVRVNPIYEHLYHNKQDMPNFTPPPEDPFLSEINGNVHELTEHEIRDLNLFESYDL	Z003_7876	Caenorhabditis_elegans	F40H3.4	Fork_head	Fork_head
40	14E07	pTH9065	TGTCACGGACCTACGGCGCGCCATGGAAGCGACTTCACAAAACC	TAGTGCACCACAATCCTGCAGGCTCCATCCACATAGTATTTCAGCAG	ATGGAAGCGACTTCACAAAACCGAGGCCCATGCCCAGTCTGCAGTAGTATGGACCGAACCCGCCGTCATTTCGGAATCATCGCCTGTACGGCTTGTGCAGCGTTCTTCCGAAGATCCTTTGGACAACAGTACCTGTGCAATGCGGAGAAAAAGTGCATTATCATGCATGACCGAAAATTCTTCTGCAGAGCCTGTAGATATTCGAGCTGTGTGAAGGCGGGTATGCGAAGAGATCTTGTCAGAAAGCAGAAGAACAACCCAAGACATCCAGCTTCCTTAGAAACCCAGCTTCCCCGGAATCTACCAGAAATGCTATCCAAATTCAGCAAAATCTTGAATATTCATCATGACGAACTGCTGAAATACTATGTGGATGGAG	MEATSQNRGPCPVCSSMDRTRRHFGIIACTACAAFFRRSFGQQYLCNAEKKCIIMHDRKFFCRACRYSSCVKAGMRRDLVRKQKNNPRHPASLETQLPRNLPEMLSKFSKILNIHHDELLKYYVDGV	Z003_7919	Caenorhabditis_elegans	F41D3.1	zf-C4	zf-C4
41	14E08	pTH9066	TGTCACGGACCTACGGCGCGCCACGAAAGAGCACGGAAAAATGA	TAGTGCACCACAATCCTGCAGGCACTTCCATCCGAAAAACCAACT	ACGAAAGAGCACGGAAAAATGAGCATTTTCTTCAATTCCCAAGGGTTTTTTGGAGAGTATCGATGGAACAGGGTGGCCCAATGTTTCAAGCTTATGAAGCAATTGGATGTGAAAACGACTGAGTATGAGGTGGCGGATCGGACAGATGATGAGAAAAACTGGAGCTCTTTTTCATATGATGCCATTCATTTTCTTGAACAAGAGTATCGAAAAACAAAATATATTAGCTCAACTGATTGTCAAAAAATTTCCGAAAAGATTCACTTAGACGAAGAGCTGATTGAGAAATGGTTCAGAGCTCGCCGAGCAACTTCAAAACGAGAGGCGAATTCAAACGAGGACATTTTCACCTCACAATACCAGCAAACAAAACTTACTATGAAAGATGGAACTGAAGGC…	TKEHGKMSIFFNSQGFFGEYRWNRVAQCFKLMKQLDVKTTEYEVADRTDDEKNWSSFSYDAIHFLEQEYRKTKYISSTDCQKISEKIHLDEELIEKWFRARRATSKREANSNEDIFTSQYQQTKLTMKDGTEGYFLRKNHEYFKKIVVTVGFSDGSV	Z003_8064	Caenorhabditis_elegans	F42G2.6	Homeobox	Homeobox
42	14F03	pTH9067	TGTCACGGACCTACGGCGCGCCCCGTCGCCGAACTTCAAATT	TAGTGCACCACAATCCTGCAGGTCTGATCCTTTGCTACACCCTG	CCGTCGCCGAACTTCAAATTCCTTGAGCTGCTGGCTATTCTCACTGGGAAGTCACAGTATCTGATTCTTCAGTGGTTTGACACAGCTGAAGAGGAAAAGCGTGAGAAGAATCAGAAGCTTGAGACGGCTACGTTCAAGCGTCATTGTCCATGGCGGAAGAGACATAGACTGATCCAGCCCCTCTCGAACGCCACCGCCATCCCGTTCCTGGAGGCTGCTTTCCAAAAATCGTCTATCCCCGGAAGCGTTGAGCTCTACGACCTTCAGCTGAAAACCAACTGGTTTATTTGTGAGCTAAAGGCCTGGTTCACTGCAAGACGGGTTGCCGAGGAGATCAAGGGGAAGTTGAGTGAGCTGACGGGAGTTCAGGGTGTAGCAAAGGATCAGA	PSPNFKFLELLAILTGKSQYLILQWFDTAEEEKREKNQKLETATFKRHCPWRKRHRLIQPLSNATAIPFLEAAFQKSSIPGSVELYDLQLKTNWFICELKAWFTARRVAEEIKGKLSELTGVQGVAKDQS	Z003_8286	Caenorhabditis_elegans	F45C12.2	Homeobox	Homeobox
43	14F05	pTH9068	TGTCACGGACCTACGGCGCGCCTCTGAAAGTGTTAGTGCTCGTG	TAGTGCACCACAATCCTGCAGGAGCTGTCACCGGAGCGTTT	TCTGAAAGTGTTAGTGCTCGTGGAACTTCTGGTAGTGGAGGTACTGGTAAGTATCCTTCATCACGAACCGCCAACAAGTGCGAGTGCCCAAATTGCCACGAAATTGAGAAATTCGGACCCAATGCAATTGCAGCACGTAAGCGAGGAGTTCATAATTGTCATATTGCTGGATGTGGAAAAGTTTATAATAAGAGCAGTCACTTGAAAGCACATTTAAGATGGCATTCTGGTGAACGTCAAATGAAGAAACGCTCCGGTGACAGCT	SESVSARGTSGSGGTGKYPSSRTANKCECPNCHEIEKFGPNAIAARKRGVHNCHIAGCGKVYNKSSHLKAHLRWHSGERQMKKRSGDSS	Z003_8366	Caenorhabditis_elegans	F45H11.1	zf-C2H2	zf-C2H2
44	14F06	pTH9069	TGTCACGGACCTACGGCGCGCCTGTATCTTCTGTCGCTACAATGC	TAGTGCACCACAATCCTGCAGGTGTCTTCCTCTTCTTCGTCAGAA	TGTATCTTCTGTCGCTACAATGCTCGTGGAAATCGCTCGAAAATCATCCATCATTTATATATGATTCACCATCTCAACCTTGGATCTCCTGACAACTTGGTATTCGTTACCGAGTATATCGAGCATTTGAAGGAGAAGCTTCACCGCAATGAATGTATCTACTGCGAAAAAATCTTCCCAGATCGTAACACTCTCATGGATCATATGCGTAAGAGAAACCATCGCGAGGTCAATCCAAAGAATCATTACTACGACAAGTTTTACATCATCAACTACCTTGAACTCGGCAAACGATGGCTCGACGTGCTCGCCGAGGACTTCGAAGATACCATGCCCACGTTCCAAGATTCTGACGAAGAAGAGGAAGACA	CIFCRYNARGNRSKIIHHLYMIHHLNLGSPDNLVFVTEYIEHLKEKLHRNECIYCEKIFPDRNTLMDHMRKRNHREVNPKNHYYDKFYIINYLELGKRWLDVLAEDFEDTMPTFQDSDEEEEDN	Z003_8411	Caenorhabditis_elegans	F46B6.7	zf-C2H2	zf-C2H2
45	14F09	pTH9070	TGTCACGGACCTACGGCGCGCCATGGGAAGTGACTATTCCGAAGC	TAGTGCACCACAATCCTGCAGGCGATGATATCCTCTAACGTTGGATTT	ATGGGAAGTGACTATTCCGAAGCTTCGAGCTCTTCATCACCGGAGATGTTTGCTCTAAATCTAACTGGTCAGAAGGCTTGCGTAGTGTGCAAGCGACCAGCGAATTGTTATAATTTTGGGGTAATGTCTTGTGATGCTTGTAAAATGTTCTTCCGGCGAACCATGTTATTGAACGTTCAGTATGTGTGCAGAAGGAAAAACCAGTGTTTTGATGATAGCTTCTCCTGTCTTAAAACTCCATATTGTCGAGCTTGCCGTCTCGTACAATGTGTGAAAGTTGGGATGAAGCTCAACCTCTCCGCAATGCTAGAAGTCAAAAATCAGAAGGATGACGCTGTGGCGACACTTATCGAAAGCCTACTCTACCAGGACGCGAGGCGTGAGAAAAATTTAATGACA…	MGSDYSEASSSSSPEMFALNLTGQKACVVCKRPANCYNFGVMSCDACKMFFRRTMLLNVQYVCRRKNQCFDDSFSCLKTPYCRACRLVQCVKVGMKLNLSAMLEVKNQKDDAVATLIESLLYQDARREKNLMTHFTYENPTLEDIIE	Z003_8544	Caenorhabditis_elegans	F47C10.4	zf-C4	zf-C4
46	14G10	pTH9071	TGTCACGGACCTACGGCGCGCCGGCAACCACCGTGAACTATC	TAGTGCACCACAATCCTGCAGGAGATTGCTGTCTCCGGGGT	GGCAACCACCGTGAACTATCGCTCCGTTGCCGTAAGAACATCTACTGTTGGTACCTGAACTGCCGACGTCATCCCAACAAACTCGCTGCCTTCCTCGCCGATCCGACAACTCGCCTCGAGACGAATGGAGATGGCGAGCTGATCCCACAACGTCGAGAACGCTACGTGTTTCGTCCAATTCTGATCCGAATGCTCGAATCGTTCTTCACACAAACGCCATTCCCAGATCTTCCACGGCGAGTCGAAATAGCGAATGCTTGCAATCACGTTCTGAAGATGGATAAGAAAGGTGTTGGGTTGATGCCAAAGGAGGTGGTCAGCCCTCAAGTCGTTTCGAATTGGTTTGCAAATAAGCGGAAGGAGTTGAGAAGAAGATCCGCTGAAGCTTCGGCCGCCTCC…	GNHRELSLRCRKNIYCWYLNCRRHPNKLAAFLADPTTRLETNGDGELIPQRRERYVFRPILIRMLESFFTQTPFPDLPRRVEIANACNHVLKMDKKGVGLMPKEVVSPQVVSNWFANKRKELRRRSAEASAASTSSASSSASSTANHDSVSVSSMSPRDEETSSRNTTPETAIS	Z003_9091	Caenorhabditis_elegans	F54A5.1	Homeobox	Homeobox
47	14H01	pTH9072	TGTCACGGACCTACGGCGCGCCATTCCCATGCATCCACTACCG	TAGTGCACCACAATCCTGCAGGTTGTGCTATGGCGCTTCATG	ATTCCCATGCATCCACTACCGCACAACGGCGAACTCGATTCAACTCGCTCTTCACCCTCTTCCACTACATCAAGCGAGCGATCGCCACTGCAGCGGAAGTCACGTATTGAATCAAACAAAAGGAATCCAACTGACAAGAAGTTTGTTGTTCATGCATGCACGTATCCTGGATGCTTTAAAAAATACTCTAAGTCTTCACATTTGAAAGCTCATGAGCGGACTCACTCTGGTGAGAAACCTTTTGTGTGCAAATGGCAAAACTGTTCTTGGAAGTTCGCACGAAGTGATGAATTGACAAGACATATGCGAAAACATACTGGAGACAAGCCATTCCGCTGCAGCCTCTGTGACCGTAATTTTGCTCGTTCCGACCATTTGAGTCTTCACATGAAGCGCCAT…	IPMHPLPHNGELDSTRSSPSSTTSSERSPLQRKSRIESNKRNPTDKKFVVHACTYPGCFKKYSKSSHLKAHERTHSGEKPFVCKWQNCSWKFARSDELTRHMRKHTGDKPFRCSLCDRNFARSDHLSLHMKRHSTI	Z003_9266	Caenorhabditis_elegans	F54H5.4	zf-C2H2	zf-C2H2
48	14H09	pTH9073	TGTCACGGACCTACGGCGCGCCCCCGACAACAATGAAAATTCCATG	TAGTGCACCACAATCCTGCAGGAATTAAAAGCATTAGAGTCAACAAGTG	CCCGACAACAATGAAAATTCCATGCCAGAGATACCAATTGACGGGGGCTTCAACTTTTTTCCAGCTCAAGAAGTTCAAGAATGGAAGCCAGCTAGAAAAGCTTCGAAAAATAAAATCAAGAAGATTTCCACAATGCATATCAACTCTTCGTGCTCCAATTGTGGATGTCGGGAAACGAAATTGTGGAGGAGAAATGAGCAAGGAGAAACTGAGTGCAATCCGTGTAATCTTTACGAACGAGTCAAAGGACATAAAAGACCACAACATCTTTGGAATAAGCCAGCTGCCAAGAGAAGACGCCGTCCAGTTGCTCCACTTGTTGACTCTAATGCTTTTAATT	PDNNENSMPEIPIDGGFNFFPAQEVQEWKPARKASKNKIKKISTMHINSSCSNCGCRETKLWRRNEQGETECNPCNLYERVKGHKRPQHLWNKPAAKRRRRPVAPLVDSNAFNF	Z003_9789	Caenorhabditis_elegans	F58E10.5	GATA	GATA
49	13A03	pTH9074	TGTCACGGACCTACGGCGCGCCATGACGGGTGGAGGTCCGT	TAGTGCACCACAATCCTGCAGGATAACGTTAGGAAATTGTCTTCACTGC	ATGACGGGTGGAGGTCCGTCATCAAATAACTCGTCTCAACCTGAAGAGGTATGCTTGGTTTGTTCCGATATATCAACTGGTTATCATTATGGAGTTCCCTCATGTAATGGATGCAAAACCTTCTTCCGTCGAACAATCATGAAAAACCAAACGTTTAGCTGCCAATTTCAAGGAAAATGTCCAGTTGATAAAAGTATCAGATGTGCGTGTAGGCATTGTCGATTTGAGAAATGTTTACAAGTTGGAATGGATCGAAATGCAATTCAACAGAACAGAGATCCAATTGGATATACAAAAAGAACACGAAGATATCCACCAATTAAAAAAGTTGAAGCCAGTGATGAGTGCTCACCTGCTATGGTATCTGAAAATGATCGCAGTGAAGACAATTTCCTAACG…	MTGGGPSSNNSSQPEEVCLVCSDISTGYHYGVPSCNGCKTFFRRTIMKNQTFSCQFQGKCPVDKSIRCACRHCRFEKCLQVGMDRNAIQQNRDPIGYTKRTRRYPPIKKVEASDECSPAMVSENDRSEDNFLTLL	Z003_250	Caenorhabditis_elegans	B0280.8	zf-C4	zf-C4
50	13A04	pTH9075	TGTCACGGACCTACGGCGCGCCATGACTCGCCATCAAACACATC	TAGTGCACCACAATCCTGCAGGGGAACTTAAAAAACTGGAAAGGATCC	ATGACTCGCCATCAAACACATCTTCCATTTCATATTGTTCAAGAGGGAAATTCGATTGACAAGCCGCCATACAGTTACGTTGCACTTATTGCAATGGCAATCGATGCTTCGCCGGATAAGAGAATGACGTTGAATCAGATTTACAAGTTCATCGAGGCCAAATTCCCATATTACCGTGACGCGGACGCGAAACGAAAACAGGGATGGCAGAACAGTATTCGACACAATCTGTCACTCAACGACTGCTTTGTCAAAAAAGCACGAGACGGACAAAGCTGCGCGAACGACAGAAAGGGCAACTATTGGCAAATGGTGGCGGACAATGCGCCTCAGTTTGACAACGGCAACTTTAAGAGAAGACGTGTCAAAAGACTTGGAATCGGAAAAATGGGTTATGCG…	MTRHQTHLPFHIVQEGNSIDKPPYSYVALIAMAIDASPDKRMTLNQIYKFIEAKFPYYRDADAKRKQGWQNSIRHNLSLNDCFVKKARDGQSCANDRKGNYWQMVADNAPQFDNGNFKRRRVKRLGIGKMGYANTTETTETGTILQQQLPFFNGLKWPQNIQTMDPFQFFKFQ	Z003_275	Caenorhabditis_elegans	B0286.5	Fork_head	Fork_head
51	13A08	pTH9076	TGTCACGGACCTACGGCGCGCCATGGCCTTCCAGCCGGCGT	TAGTGCACCACAATCCTGCAGGCATCTTCCATCTCGTCTTTTATTGAAT	ATGGCCTTCCAGCCGGCGTTTAACGCCCGTCTGATAAACGAGGTTCGTAAGTACCCGTGCCTATATAATCATTCACGACGTGGCAGCGGGGACACAATGGAACGTCAACGACTTTGGGAATCAATCGCCAAAAATATTGACCCGAATTGTGCGGCAGAGTTTGCGAAGAAACGATGGTTGCAGCTGAGGGATCGATATCGGAAAGAATTAAAGATTGCAATTAAAAATGGATTTGTGACACCTGTTAGATGGTGTTATTTTAATCAATTATCGTGGTTGGACCCGTTTTTGAAGGATAATATTGGTCAAGCAGCAGATGAAGGCAAAAAAACTGGTAAATCTGACTCTTTTGATGAGCCATCAGGCACACCGTTCAGCTGGTTCGGTTTTCCAAATTTA…	MAFQPAFNARLINEVRKYPCLYNHSRRGSGDTMERQRLWESIAKNIDPNCAAEFAKKRWLQLRDRYRKELKIAIKNGFVTPVRWCYFNQLSWLDPFLKDNIGQAADEGKKTGKSDSFDEPSGTPFSWFGFPNLNSIKDEMEDD	Z003_641	Caenorhabditis_elegans	C01G12.1	MADF_DNA_bdg	MADF_DNA_bdg
52	13A09	pTH9077	TGTCACGGACCTACGGCGCGCCATGCTAGCCTATGAAGGCCC	TAGTGCACCACAATCCTGCAGGTTGCGGAGGAGAGCAGTAG	ATGCTAGCCTATGAAGGCCCGCTAGCAGAAACCAATTACTCACGTCAAAAAGCAAAGGAAATGGCCAAGAAATTCATACCAGGTGAACTGTGCAGTGTTTGTGGTGACGTAGCATCTGGAATTCACTACTCGGTGGCCGCTTGCAACGGGTGCAAAACGTTTTTTCGTAGAGTCGTTTTAGAGAATCGAACGTATTCCTGTAAAAATAATGGAGACTGTATAATTGACAAATCAATGCGATGCTCTTGCCGACATTGTCGTTACAAAAAATGCATAATTGCCGGAATGGATCGCGGAGAATTGAGCATGGAACGACGACGGAAACGAAAAAAGTTGAACGGATTAGAAGGATCCGAAGAAAGCTGGGAAACTGAGGATGCTCTTATCAATTTGTTGTTG…	MLAYEGPLAETNYSRQKAKEMAKKFIPGELCSVCGDVASGIHYSVAACNGCKTFFRRVVLENRTYSCKNNGDCIIDKSMRCSCRHCRYKKCIIAGMDRGELSMERRRKRKKLNGLEGSEESWETEDALINLLLYKETLYQKLLLSSAM	Z003_701	Caenorhabditis_elegans	C02B4.2	zf-C4	zf-C4
53	13A11	pTH9078	TGTCACGGACCTACGGCGCGCCATGTCCAACACTACTGAAATTCCAA	TAGTGCACCACAATCCTGCAGGCACTGACCGCTTGCCAATG	ATGTCCAACACTACTGAAATTCCAACGACTTGTTCAATTTGCCGTAGAAATGCTAAAGGATACCACTATGACGTTATATCCTGCAAAGGATGTAAAACATTTTTTCGGAGAATGAGTTTGATAAACTTTCAAGGAAAATGTGATTTGAACAATCAATGCTTTGATTTGACAAAAGCAAATGAGCCTTATTTGCGATGTAGAGCCTGTCGTTATCGAAAGTGCCTGGATGTTGGTATGAACCAAAAAGCTATTCAAATACCTGAAAGGAATCAAACGTTTGGCGTTATAGAAACCATGACAAAAAATACAATTGATGCTTTAGTTTATCTAGAAGAGAAGCTCGAAAAGTTTAGATTGTCCGCAGACAATCCTCATTGGCAAGCGGTCAGTG	MSNTTEIPTTCSICRRNAKGYHYDVISCKGCKTFFRRMSLINFQGKCDLNNQCFDLTKANEPYLRCRACRYRKCLDVGMNQKAIQIPERNQTFGVIETMTKNTIDALVYLEEKLEKFRLSADNPHWQAVSD	Z003_834	Caenorhabditis_elegans	C03G6.10	zf-C4	zf-C4
54	13B03	pTH9079	TGTCACGGACCTACGGCGCGCCAAGCTATTGCTTTCTGATTATGAGGAT	TAGTGCACCACAATCCTGCAGGTTTTTTTTGAAGAGCTCGTCTCAGT	AAGCTATTGCTTTCTGATTATGAGGATGTAGGATCAGTTACGATAGATACGCCAAAGCTAAAAAATCGGAATGTTCGCCTTCGTGGAGCAGGTCGGCCACAGAAAGGTGGCGATGATTATAAAGATTATGGAAGAAGCGAAATGGAACAGTTTCTTCGTCTTGTCTCGGACAAGCCTTTTCTGTGGCACACAAAAGATTCGGATTTTCACAGAAAAAAAGAGAAAGGGATGCCTGCGTGGGCCGAAATCGAGAGGACTTGCAATACGTTTATGGGAAAAGGAAGAACTCCAGGAAAAACTGCTGCTGCTCTTTTCAAAAAAATGGCTACAACCTACAAATCTCATTTGACACGAATCCAAAAGGCTCCATCAGGATCCGCCGTGACACCAAAGAAAGAT…	KLLLSDYEDVGSVTIDTPKLKNRNVRLRGAGRPQKGGDDYKDYGRSEMEQFLRLVSDKPFLWHTKDSDFHRKKEKGMPAWAEIERTCNTFMGKGRTPGKTAAALFKKMATTYKSHLTRIQKAPSGSAVTPKKDLFCYAELMSFMDEDITHRAPTCSFIVGAGPDVDVLPTETSSSKKK	Z003_1087	Caenorhabditis_elegans	C06A5.4	MADF_DNA_bdg	MADF_DNA_bdg
55	13B11	pTH9080	TGTCACGGACCTACGGCGCGCCACTTTTCAAATGAATGTTCTTCAAAAC	TAGTGCACCACAATCCTGCAGGCGTTTGTATGAGTTCTCATGTGTGT	ACTTTTCAAATGAATGTTCTTCAAAACTTGGGCCACACGTTACCCTTACCGTTTGTTCCAATGCTAAAAAATGTTGCACCTGCTCAAAAACGGTTGAACAATAAGCGGGCATCGTACGTGGACCATTCTCAAAAAGGAAATTTGAAAAAGTATAGATGTGATGTATGCGACAAGACGTTCAGCCGAAGTAACACCTTGATAACTCATAAGAGAATTCACACCGGAGAAAAACCATTCAAATGCGAACATTGTGGAAGGGCGTTCCGTCAACCCGGAAACTTGACACGTCATCGACTTACACATACAACGGTGAAACCTTACGTATGCGGACTCTGTGACAAAGCCTTCAATCGAGCATCAAACCTTCATACACACATGAGAACTCATACAAACG	TFQMNVLQNLGHTLPLPFVPMLKNVAPAQKRLNNKRASYVDHSQKGNLKKYRCDVCDKTFSRSNTLITHKRIHTGEKPFKCEHCGRAFRQPGNLTRHRLTHTTVKPYVCGLCDKAFNRASNLHTHMRTHTNV	Z003_1526	Caenorhabditis_elegans	C10A4.8	zf-C2H2	zf-C2H2
56	13C12	pTH9081	TGTCACGGACCTACGGCGCGCCGGAATTTTACCTAAATGTTTCCGACAG	TAGTGCACCACAATCCTGCAGGTTTCTATATCTATTTCCGAGTCCGTTC	GGAATTTTACCTAAATGTTTCCGACAGCCGAGAAAACAGAAACTTGAAGAAGATTCGTGTTCATCTTCAATTCTTCGAATTATCAAGAAAACCACACCCAGTCTTCCAAATAGATCATATACAATGATTAACCAAAACATGGAACATCCACTACAATGCTGCTACTGCTTGGAAGTGTACGAAAAGCGATACATGACGCAAGTTCCAAAAACCGAGCAACGAATTGCCAGATGGGTGGCAATATTAGGAGAACAATTCCGTATACGTCTTCGAATGAAACCTGCAAATTACATGTGTCGAAAACATTTCCCGCAAGCGGATTTCAGTTCTCGTGGACGACTTCTTAAAACAGCTGTTCCAAATGTTGTTTCCCAGGAGAAAGTACTGGCATTCAAGCTT…	GILPKCFRQPRKQKLEEDSCSSSILRIIKKTTPSLPNRSYTMINQNMEHPLQCCYCLEVYEKRYMTQVPKTEQRIARWVAILGEQFRIRLRMKPANYMCRKHFPQADFSSRGRLLKTAVPNVVSQEKVLAFKLEGNTFVEVKEDNTNIKMEKGTDSEIDIEN	Z003_2037	Caenorhabditis_elegans	C17G10.4	THAP	THAP
57	13E07	pTH9082	TGTCACGGACCTACGGCGCGCCATGCCTAAAGAGCAGTATATGTGC	TAGTGCACCACAATCCTGCAGGTACTGTTCCTGAAAGTGTCTTTTCC	ATGCCTAAAGAGCAGTATATGTGCCAATTATGTGCAAATCATGGGATTTTTAATCAACCAAAGAAGGGACACAAACAGAAATGTCCATACAGAACGTGTCCATGCTCTTTATGTGCATTAAATACCAAACGACGAGCATTAGATCAAATTGAAAGGCAATTAAAGCACACAAATGAACCAATGACAGGACAAACTGCAACATCAATGGCAAGTCCAACACCAGAATGTCCATTATCGCCTACTACACCAAAAATGACTCCTCATACTCCAACATCAGGAAAAGACACTTTCAGGAACAGTA	MPKEQYMCQLCANHGIFNQPKKGHKQKCPYRTCPCSLCALNTKRRALDQIERQLKHTNEPMTGQTATSMASPTPECPLSPTTPKMTPHTPTSGKDTFRNSI	Z003_2842	Caenorhabditis_elegans	C32C4.5	DM	DM
58	13E09	pTH9083	TGTCACGGACCTACGGCGCGCCGCGTCATCTGCTTCAACAAAAAA	TAGTGCACCACAATCCTGCAGGGAGTTCCCGATGTTAAGTGAGTAGA	GCGTCATCTGCTTCAACAAAAAAGCCACGTGGTACTCCATATGACCGTACTAACACACCAATGACAGTAGTTCCACAAATGCCACAGTTTGCTCCAGACTTTTCAAACTATAATCTCACAATGAATGCTTGGAGTGAGTTCTTTAAAAAGGATAGATGTATGGTTTGTGGTGATAACTCTACTGGATATCATTATGGAGTACAGAGTTGTGAAGGATGCAAGGGATTTTTCAGAAGAAGTGTTCACAAGAATATCGCATATGTTTGTACCAAAGGAGAAAATTGCACATTCTCATATGAAAATTGTGCGGCAAATCGTGGAGTACGTACTCGTTGTCAAGCTTGTCGATTTGCCAAATGCCTCGCAGTTGGAATGAATCGTGACAACGTTCGAGTGAAC…	ASSASTKKPRGTPYDRTNTPMTVVPQMPQFAPDFSNYNLTMNAWSEFFKKDRCMVCGDNSTGYHYGVQSCEGCKGFFRRSVHKNIAYVCTKGENCTFSYENCAANRGVRTRCQACRFAKCLAVGMNRDNVRVNKETDKDVKPSVASPNFEMTSQVKELTAAFVANMPCSTHLTSGTH	Z003_2879	Caenorhabditis_elegans	C32F10.6	zf-C4	zf-C4
59	13E10	pTH9084	TGTCACGGACCTACGGCGCGCCATGCTGTGCCAGGTGTGCG	TAGTGCACCACAATCCTGCAGGCAACTTTTGTCCATTTACTCACTGTAC	ATGCTGTGCCAGGTGTGCGGGGCAGAAGGACCGGAGCCCCATTTCGGAGGAATTTCATGTAGAGCATGCGCAGCATTTTTCAGACGATATGTACACTCAAGGAAGTTGGACATTTCATGTACGTGTAAGCACCGGTTGGCAACTTCACATCCCTGCAGACACTGTCGGATGCTGAAATGTATGGCAACGGGAATGGTAAAGTGTAAAGTGCAAGGATCCAGAGAGAAAAATAAAATTACCACATCTAGTCTACCTGGACATATCTCTTCAATATCTTTGTTATCAGCTCGCATAGTACCTCGTGATTGCTCAAATATCTCGTGTACAGTGAGTAAATGGACAAAAGTTG	MLCQVCGAEGPEPHFGGISCRACAAFFRRYVHSRKLDISCTCKHRLATSHPCRHCRMLKCMATGMVKCKVQGSREKNKITTSSLPGHISSISLLSARIVPRDCSNISCTVSKWTKVE	Z003_2965	Caenorhabditis_elegans	C33G8.10	zf-C4	zf-C4
60	13E11	pTH9085	TGTCACGGACCTACGGCGCGCCATGACCAGACAAACTACGTCGC	TAGTGCACCACAATCCTGCAGGTCGTTTCTTCAAGTTTGTGATAAGCA	ATGACCAGACAAACTACGTCGCAAACTTGCTTGATCTGTGGAGATTCTGCTGATTCTCTCCATTTTGGGGCATTGTCATGCAGAGCATGTGCCGCGTTTTTCCGTAGGAAGGTGGCCGGTCGCCGAAATATTTTTCGACGTTGTGATCGTCAATGCAAAGTTGACACCGGGATGAGGAAACTGTGTGCCAGCTGTCGATATGACAAGTGCTTAAAAGTTGGAATGAGAGAATCAGCGGTACTTTCAAGACTTGCAAAGAAGAATCAGAATTATAAGAAATCAATTGTTGGGTCGCCGGATGCATATGAGCCATCTACCTCAACGTCTGACAGTGTTTTGGAGAATCTTCAAAGTGCTTATCACAAACTTGAAGAAACGA	MTRQTTSQTCLICGDSADSLHFGALSCRACAAFFRRKVAGRRNIFRRCDRQCKVDTGMRKLCASCRYDKCLKVGMRESAVLSRLAKKNQNYKKSIVGSPDAYEPSTSTSDSVLENLQSAYHKLEETR	Z003_2973	Caenorhabditis_elegans	C33G8.6	zf-C4	zf-C4
61	13F04	pTH9086	TGTCACGGACCTACGGCGCGCCATTCTCAACAATGGTGTCCAGAAA	TAGTGCACCACAATCCTGCAGGTAGATTTTCTTTCTCTCTTTGCTTTAT	ATTCTCAACAATGGTGTCCAGAAAAGCCAATGTGATTCTGGCGTGATGTCCAATACTCTTAAAAGTCAAGATAGAAAAGAATCAGAGGGTGTTCAACTTAATTCTCCATTGCCAGAAAATCATGCTGTTAACCAGACTGTCAATCAGAGTATGATCAGAAAAGGCAGACCAAAGAGAAGTACAAAAACTAAAAGTGGGTCAGAGACTGAAAACGAGTCAATGAGCGAGGATAATGATGATTTCTCGGAGCACGATGAAGATTTTGACATTGAACAAGCTGTTCAAGCAATTGACAATGTCCATCATAAAGCAAAGAGAGAAAGAAAATCTA	ILNNGVQKSQCDSGVMSNTLKSQDRKESEGVQLNSPLPENHAVNQTVNQSMIRKGRPKRSTKTKSGSETENESMSEDNDDFSEHDEDFDIEQAVQAIDNVHHKAKRERKSR	Z003_3088	Caenorhabditis_elegans	C34F6.9	AT_hook	AT_hook
62	13F07	pTH9087	TGTCACGGACCTACGGCGCGCCATGGATAATAACTACTTAGATGCTTCT	TAGTGCACCACAATCCTGCAGGGTTTCGAAATGCCAGGAGCTG	ATGGATAATAACTACTTAGATGCTTCTCATCGGAAACGGCTTGTATGCTCCAATTGCAATGGTACGAACACAACTCTCTGGAGAAGAAAAGCTGAAGGAGATCCAGTCTGCAATGCTTGTGGACTATATTTCAAGCTTCATCACGTTACCCGCCCCATCCCAATGAAGAAAAACAAGAAACATGCAGTTCTTCCAGCTCCTGGCATTTCGAAAC	MDNNYLDASHRKRLVCSNCNGTNTTLWRRKAEGDPVCNACGLYFKLHHVTRPIPMKKNKKHAVLPAPGISKL	Z003_3331	Caenorhabditis_elegans	C39B10.6	GATA	GATA
63	13F10	pTH9088	TGTCACGGACCTACGGCGCGCCATGGTCAAATCAACAACTGCTGG	TAGTGCACCACAATCCTGCAGGCTTCATCCAACTCCTGATTGTGG	ATGGTCAAATCAACAACTGCTGGAAACAATGCGGTTTCTTCATTAGAATCCACTGATTCCAAGAAGTCAAGAAAGGAAAAGTCTCGCGAGAAGGAGCATCGTCGTGCTCAATGTATCAACTCGGCCTTTGAGATTCTTCAGCAACATATTCCATACCTCAAATCGGAAGAGAGAAAGTCGCTGCCAAAGATCAAAACGCTTCGTCTTGCCATGCAGTACATTGATCATTTGAAAAAATTGCTGGGAGGAAATGAGATGCTCGAAACCGATTGCAACGAATCTCGCCCACTCACTCACTCAGATTTCCGTGTCAATATCTCGAATGAGATTAGAATTCGGAACAGTTACCGAGAGAGAGCCCACAATCAGGAGTTGGATGAAG	MVKSTTAGNNAVSSLESTDSKKSRKEKSREKEHRRAQCINSAFEILQQHIPYLKSEERKSLPKIKTLRLAMQYIDHLKKLLGGNEMLETDCNESRPLTHSDFRVNISNEIRIRNSYRERAHNQELDEA	Z003_3591	Caenorhabditis_elegans	C44C10.8	HLH	HLH
64	13G04	pTH9089	TGTCACGGACCTACGGCGCGCCATATATCCAAATACCCTCGGCAGT	TAGTGCACCACAATCCTGCAGGTGTGCATCGTATGAAGATGTTGAT	ATATATCCAAATACCCTCGGCAGTTACGGTGGTGACAAGCAAGTGCAATGTTTATGGGAGACCAATGGACAAGTGTGTATGCACGTATGTCAGAATTCAGGAGAATTGTCAACTCATATCAGTTCAAACCATATCACGCATGACAGCAAGTTTGTATGTCTTTGGAAAGGATGCGACCGAGAGTTCAAAATGTTTAAGGCCAAGTACAAACTGGTAAACCACATGCGAGTGCACACTGGAGAACGTCCGTTTTTATGCGATGTTTGCAACAAAGTGTTCGCAAGATCCGAGAATCTAAAAATCCACAAACGAATTCACTCAGGAGAGAAACCATTCCAATGCACACATAATGGATGCACAAAACTGTTCGCCAACTCTTCAGATCGCAAGAAGCATATG…	IYPNTLGSYGGDKQVQCLWETNGQVCMHVCQNSGELSTHISSNHITHDSKFVCLWKGCDREFKMFKAKYKLVNHMRVHTGERPFLCDVCNKVFARSENLKIHKRIHSGEKPFQCTHNGCTKLFANSSDRKKHMHVHSSHKPYSCMYPDCGKTYTHPSSLRKHTKVHENEKKSQLSPEHDESSDSGNASIGTPTTDESLTFSPENIKRDQHLHTMHT	Z003_3796	Caenorhabditis_elegans	C47C12.3	zf-C2H2	zf-C2H2
65	13G09	pTH9090	TGTCACGGACCTACGGCGCGCCATGTCCGAACCTCCGAAGAAG	TAGTGCACCACAATCCTGCAGGAGGTGTCGATAATCTTGAACACTTC	ATGTCCGAACCTCCGAAGAAGCCATTTGCTTGTGCTATCTGCCGAAACAAGTCAAGTGGATGCCACTATGGGGTACTGTCATGTGATGCTTGCAAGATGTTCTTCAAACGAACTTATTTGATGGAGAAGTACTATACATGTAGAAGGCAGGAAAGTTGTTACAATATGGACGGTGGGAACAGAAAATGCAAAGCGTGCCGCTTCAAAAAGTGCCTGGAAGTTGGGATGAACCCTGAACTATTTTCTCGCTCCGAATCTCAAATAATCTCAACAAATATCCCCACACAACTAATCACTCAAGACCATCGAAATGCTGAATTTCTGCAAAAGCTGAAAATCTTGGACAAGACTCGCCATGAAGTGTTCAAGATTATCGACACCT	MSEPPKKPFACAICRNKSSGCHYGVLSCDACKMFFKRTYLMEKYYTCRRQESCYNMDGGNRKCKACRFKKCLEVGMNPELFSRSESQIISTNIPTQLITQDHRNAEFLQKLKILDKTRHEVFKIIDTY	Z003_3929	Caenorhabditis_elegans	C49D10.2	zf-C4	zf-C4
66	14D05	pTH9091	TGTCACGGACCTACGGCGCGCCATGGCACAATGGACGGATCC	TAGTGCACCACAATCCTGCAGGGTTGATTATTGAACATTTGGAACATTT	ATGGCACAATGGACGGATCCATCCCGTCAGTGCCTCATCAATGCCATTCGGAACCGGCCAGTCATTTGGGATAAGAATTATTTTGGAGAAAGTAATTATAGAACTTTGAAGACCTCCTGCCTCCGTGAAGTGACGTCAGAGCTCAATTCAATGTTTCAAATGCCCATAAAATTCACGTGTGAAGACGTCAGATCTCAGTGGAAAAATCTAAAAGACACATTTGTACGGAAGCTCCGATGGGTTCACGAGGGAAAATATATGGAAGACGCGATGAAAGAGCCCACTTGGAAATTTTATAGAATGCTCACTTTTCTAGATGAGAAGGAGGCGAAAAGGCTCGGCGACACGTGTGAGCACACCTATGAGTTGGCCCCGAATTCCACGTCGTGTGGGCAGAGA…	MAQWTDPSRQCLINAIRNRPVIWDKNYFGESNYRTLKTSCLREVTSELNSMFQMPIKFTCEDVRSQWKNLKDTFVRKLRWVHEGKYMEDAMKEPTWKFYRMLTFLDEKEAKRLGDTCEHTYELAPNSTSCGQRAQISYEPTSTEEKMFQMFNNQP	Z003_7426	Caenorhabditis_elegans	F36D1.1	MADF_DNA_bdg	MADF_DNA_bdg
67	14D08	pTH9092	TGTCACGGACCTACGGCGCGCCATGGATTGTGGCATGTGGTG	TAGTGCACCACAATCCTGCAGGGTTTCGACATTTCAGCGTCATGT	ATGGATTGTGGCATGTGGTGTGTGTTCAGCGAGAGGCGGCGACACGTCGAGAGATTATGGCGACGACGTCTTCTTGTCACTTCAGATGAACGGAGGGCCAGGAGGAGATTTCTTCGCCTAATGCGTGGTTTCGATGCAGAAGACGTTGAGGTAATACGAAAAGCCGTAGAAAGTGATGGTGTCGACTCGAAAGCGTGTGCTCCGGGACCACCAATGGATGAACGGGTAGAAGAAGATCCGCCGGACGAAGATTCTGGACTAATTCCACAAATCGATCGTCCAATGAGTATGCCGTACTTATGTTGTAAATTATGGAGGTGGAAAGATTTACAAGTTGACGCAGCATTACATCGATTAGAAGCTCTTCCATGGTGTCGATTTGGAAGGGTTACGATTAAT…	MDCGMWCVFSERRRHVERLWRRRLLVTSDERRARRRFLRLMRGFDAEDVEVIRKAVESDGVDSKACAPGPPMDERVEEDPPDEDSGLIPQIDRPMSMPYLCCKLWRWKDLQVDAALHRLEALPWCRFGRVTINNATVSCCNPYHYALWIRPETNGGDDDGSEDKNSSVPQNNHRSSLIGNGHITYRHRDHTHDAEMSKL	Z003_7603	Caenorhabditis_elegans	F37D6.6	MH1	MH1
68	14F11	pTH9093	TGTCACGGACCTACGGCGCGCCATAAGCCAGTTTACAGATGCATTTGA	TAGTGCACCACAATCCTGCAGGCGTCCGCCAAGCTTTTCTTC	ATAAGCCAGTTTACAGATGCATTTGAAGCTGGTATGTACAATCCCTATTACTACCCAGACACATCCGACAGTGGCTCGCCTTCCTCTCTCTCTTGTTCGTCACTAGATTACGATGTACCACCCCCACCACAATACGAGAAGGATGTTGCACGAAGTTCAGGAAGAAATCAATTGGGTAGGACGTACAGCCCCGGATTGCCGTTGTCAATGTGTGAACGCGAGGAGATTGTGAAGCTTTTTCAGGGTGGTTGGAAAATTTGCGACATTTCAAAACGGCTCTGTGTCACGCACAGTTGTGTGAGCAAAATTCTTAATAGATACCGCCAAACTGGATCAGTAAAGCCAAAGGATGCAAAAGAAGGTCGAACGGAATCTCCTTTAGTTTTAGCTGTTAGGGAT…	ISQFTDAFEAGMYNPYYYPDTSDSGSPSSLSCSSLDYDVPPPPQYEKDVARSSGRNQLGRTYSPGLPLSMCEREEIVKLFQGGWKICDISKRLCVTHSCVSKILNRYRQTGSVKPKDAKEGRTESPLVLAVRDYRSRLGMCRQSEIREQLIRDGVCTRDNAPSRSSINHILRTKLDIKRRKKSLADE	Z003_8626	Caenorhabditis_elegans	F48B9.5	PAX	PAX
69	14H12	pTH9094	TGTCACGGACCTACGGCGCGCCGAGAATTACAGTCAGCAACAGGC	TAGTGCACCACAATCCTGCAGGTATCGGATGGATTGATTATTCGGC	GAGAATTACAGTCAGCAACAGGCAATCAGATTCTCAAAGTTTCAAGAAGAACAGTGGAGTCCACTGTATGACATCAACGCTCAACCGCTACAACAACTTCAAGTACATGTTGTTGCTGATAAGGGATTCAACTACAACTCAAATGATAATTGCTTTGTGAACCAGAAGAAAAATCATTTCCAGATCTCTGTAAACGTGGAAGCTTCCGATACAATGCCACCAAAGTACGTTAACTTCAACAACCGACTCGTTCCAATTCGTGACTTCAAACTTTCGTTCTGTGGAGTTAAAGCTGAGATGCCATCGTCTGAAATCACAATTCGCCAATCTCGAGCCGATCGTAAACCACATACACATACTCCTGTGCTCTTTGAAATTCAAGAACGAAGAATGACAAAA…	ENYSQQQAIRFSKFQEEQWSPLYDINAQPLQQLQVHVVADKGFNYNSNDNCFVNQKKNHFQISVNVEASDTMPPKYVNFNNRLVPIRDFKLSFCGVKAEMPSSEITIRQSRADRKPHTHTPVLFEIQERRMTKVCVPRLHFSETTLNNQRKQKNRPNPEQKFFLLVVRLFASIDESEHGVLIQSYASEKVIVRATNPGSFEPQDTDIGWQRNGGALYTQGAVSVGTEHQVESAKLTVAGDIYMSGRIINPSDI	Z003_9937	Caenorhabditis_elegans	F59B10.1	NDT80_PhoG	NDT80_PhoG
70	15D11	pTH9095	TGTCACGGACCTACGGCGCGCCGATTTCAATAATTGGCTCAATGGAATA	TAGTGCACCACAATCCTGCAGGTTGACACCGGATAATCATAACCTG	GATTTCAATAATTGGCTCAATGGAATAGAAGTACCAAATTCTTACGAGTCTCAACAAAGTGACTCATCTTCATCAGTTGATGAATCAGGCTCCAAGACATCTTCCCCTACGTCAATGCAACAGAATCCGTCACAAGACGGCAGGAAAAATCGGAAAAAAGGGACAAATCTCTATGGTCGACCTTATTGTCCTGGTCGACCGTTATCGATGGAAGAAAGAACTCGAATTATTCAATTACATAATAATGGAATGAAAGTCAACGCCATTTCAAAATCTTTGTGTATTTCGCATGGCTGTGTAAGTAAAATTATCAGTCGATTTCGAGCGACGGGAGTACTTCTTCCTGCATGTTCTCCCGAACAAAGAAAATCTCGAAAACGGAAATCGTCAATGGAAGGT…	DFNNWLNGIEVPNSYESQQSDSSSSVDESGSKTSSPTSMQQNPSQDGRKNRKKGTNLYGRPYCPGRPLSMEERTRIIQLHNNGMKVNAISKSLCISHGCVSKIISRFRATGVLLPACSPEQRKSRKRKSSMEGSAMEQSFIPVFVSMQDANGNEYLNEYYSIPVGNNDGSGYDYPVSI	Z003_12555	Caenorhabditis_elegans	R13.2	PAX	PAX
71	15F03	pTH9096	TGTCACGGACCTACGGCGCGCCATGAACGATTTGAGAGCTGATTCTC	TAGTGCACCACAATCCTGCAGGCATTTGAAGTCAACAGAGATTCGGG	ATGAACGATTTGAGAGCTGATTCTCCAAATCATGATCCTCTTGAAGATGACTTTACTCTAGCTCTCATCGATTCTGTTCAACGTAACCCGTGCGTGTACAATCGATATGATCCGCTGCACAAAGTCACTGATTACAAGCACGAGATTTGGAAGTTGATCAGTATTGAAATCGGATACGATGGACAACCAGTGGAATTGGAAAGAAAATGGAAACATATGAGAGACAAATATGTGCGATTGAGAAAACAGGATAAACAGAAAGCTCCAATTAAGAAAACGAATAAGTGGTACAACTACTACCATAAAATGTCCTTCCTGGACCCATACGTTGAGCATCGAAATCGGAAGAGGCAAAAAGACTATCTTAACAGCAATACTCCTGATTTCTTGGATGATGAT…	MNDLRADSPNHDPLEDDFTLALIDSVQRNPCVYNRYDPLHKVTDYKHEIWKLISIEIGYDGQPVELERKWKHMRDKYVRLRKQDKQKAPIKKTNKWYNYYHKMSFLDPYVEHRNRKRQKDYLNSNTPDFLDDDTAFLDGLSVKEMLKPESLLTSND	Z003_13342	Caenorhabditis_elegans	T07C12.11	MADF_DNA_bdg	MADF_DNA_bdg
72	16B11	pTH9097	TGTCACGGACCTACGGCGCGCCCATCACAACGTGGACTACATCTG	TAGTGCACCACAATCCTGCAGGGTTTGCTCCGGATTCCAGTAC	CATCACAACGTGGACTACATCTGTGGAGTGATGATATTTGGAGGATCAAAGAATCAGTTTAATGAGTTGCTCAATCCTGTAGTGGTGGCTCAAATGAGCAAGCAGAGAAAACAAAAGAAGGTTCCAGTAAAGAATCCAGCAGGAGAAGCCAAGAGAGGAAGAGGACGCCCAAGAAAACAGAGTTCAGAGGAGAAGGTGCAGATTCCAAAGGTAGTTGTGAAATTTGAGCCAAAGAAGCGTGGAAGACCAGCTGGAGCAGCGAAATGGAGCCAGGAGGTAGCTGTAGTGCTCCAAAAGCAGCCACAGAGGAAAAGAGGACGGCCTCTGAAAATTGCGAAAAAGATTGAGCCGGTGTTTCATCAGAAAAAGGAAAGTAAACAGAACTCGGAGGAAAAGGCT…	HHNVDYICGVMIFGGSKNQFNELLNPVVVAQMSKQRKQKKVPVKNPAGEAKRGRGRPRKQSSEEKVQIPKVVVKFEPKKRGRPAGAAKWSQEVAVVLQKQPQRKRGRPLKIAKKIEPVFHQKKESKQNSEEKALIQQEAVKGEPKNRGRPCGAAERSREVVKKLQKQPPRKRGRPLKIAKNMEPEINQKKDTKQVHVCPICTLASKNGTCLCTKCQKWVHLKCTGIRSKQ	Z003_15928	Caenorhabditis_elegans	Y116A8C.22	AT_hook	AT_hook
73	16F09	pTH9098	TGTCACGGACCTACGGCGCGCCGCGGGTCTTCTCAACCCGA	TAGTGCACCACAATCCTGCAGGCTTTCAATTCCTCTGGCTTTGATTC	GCGGGTCTTCTCAACCCGAATCCGGTCACTGAACAGGACCCGAGCACTTTCAAGCCGCCTCCGAAAATGAGCAATAATGTTCGAAAAAACATTAATTTGACTCCGGTTATTGAGAATGCAGTTCCGAGTGGATTTGAACTGGAAAGTCCGAAAGATCAGGCATTTGATGTGGTTCATGGAAGACTATCTATGGGACAGAATCAGACATGTTATTTTGTCACAGTCGAGGAAATGAGACGAAGATTGCAAAGTCCGGAGAAGCTCAATAGTTCGAGTATCGCATGCAATCTTAAAAGGCCAAAACTGAAGAATGGAGGTGAACTGATGCGCGCTCAACTGAGAGATCATGGAATCAAGGTTCAACTGAATGCGAAACAGAAGGCTTTTCCCAACAAAGTG…	AGLLNPNPVTEQDPSTFKPPPKMSNNVRKNINLTPVIENAVPSGFELESPKDQAFDVVHGRLSMGQNQTCYFVTVEEMRRRLQSPEKLNSSSIACNLKRPKLKNGGELMRAQLRDHGIKVQLNAKQKAFPNKVIALVEAEAVHLGLDLGTAVRDDYPVQDIIQEVAHEALADEDADLDALMNDKDFTECMSALESVFTSVVPPITGIEPKPSNNMRLNNGMETFSSASHGLGIVSQRVWLPQLTAIGNGVASELRRLTETPTESKPEELKA	Z003_18225	Caenorhabditis_elegans	Y62E10A.17	TF_AP-2	TF_AP-2
74	13A02	pTH9099	TGTCACGGACCTACGGCGCGCCCGTTGGAATCCAAAAAATGAGATGAC	TAGTGCACCACAATCCTGCAGGTTTGAAGTCGATTCTGTTCACGAA	CGTTGGAATCCAAAAAATGAGATGACTCGTTTCAAACGAGAACGACGTTCTTCAACAAGTTCATCAGTTATCACTAAATCAGAGATCGGGGATTTAGATGCTCCACCAGCGCCAAGAATTAATGCTCCACAAGTGAAAATTGGTGCTGATGGAAGATTAGTTATTGATGAGACTAGTTTGGTTGTACATTCCGCCCAAATCAATCATGAATCTGTTTGGGAAACTGTCGAAGAGGGGCGAATGGGTGCCAAAATCACATCCATGTCATTCCGAAAACGGGGCTTTGGAAAATCGAGTTTTTGGTCAGAAAAGGAAACTGATTTATTTTATGAAGTATTACAATGCACTGGGCAAGATTTTGGTTTGATGAGTCATTACCTCCCGAAAAGAACTCGTCCA…	RWNPKNEMTRFKRERRSSTSSSVITKSEIGDLDAPPAPRINAPQVKIGADGRLVIDETSLVVHSAQINHESVWETVEEGRMGAKITSMSFRKRGFGKSSFWSEKETDLFYEVLQCTGQDFGLMSHYLPKRTRPELKAKYNREEKINWARVLNAISHPVRLDGNLEVRISKLMTEMEEEAQEKKAKGEYEKAEEKRIREQNRLQK	Z003_224	Caenorhabditis_elegans	B0261.1	Myb_DNA-binding	Myb_DNA-binding
75	13E06	pTH9100	TGTCACGGACCTACGGCGCGCCCTGCCAAATGTCAATAATTCTACAAGG	TAGTGCACCACAATCCTGCAGGCGTTTCCAATGATTTGATAAAAAAGAC	CTGCCAAATGTCAATAATTCTACAAGGAAGCGAAAGGCTCCAGGACAAAACGAGCAAGCAACAGTGAAACGACGTCAAATCGGCATCGAGAAATGGAGGTTGCCATCAAGATCGGTAGTCCAACCGAGTGCAGATATTTCTGATTTGAGGCGCCCACCTATCTCGTATGTTGCATTGTGTGCCTTAGCCTGTCGGAATGCTCCAGATATGAAAATCACCCCAGCTGGAGTCTATGCATTTATTCTGCATCACTGGCGGTATTACCGATATGCAAATGAAAACTGGAAGAACTCAGTGAGGCATCAACTTTCATCAAAGGAACATTTCGACGAAGAAACATTCCAGCCTGATCCAAGTAATCAGACAGTCAGAAGAAAATTTTATATCGTCAAAAATCCA…	LPNVNNSTRKRKAPGQNEQATVKRRQIGIEKWRLPSRSVVQPSADISDLRRPPISYVALCALACRNAPDMKITPAGVYAFILHHWRYYRYANENWKNSVRHQLSSKEHFDEETFQPDPSNQTVRRKFYIVKNPNMIRQNLISDADFDFFRKDSRGIEFYQKMFAGQIGLPRSLFYQIIGNE	Z003_2669	Caenorhabditis_elegans	C29F7.4	Fork_head	Fork_head
76	14A05	pTH9108	TGTCACGGACCTACGGCGCGCCCCAGTCATCCACAGTCCACC	TAGTGCACCACAATCCTGCAGGCTGGATGATGCGGTGATAAATGT	CCAGTCATCCACAGTCCACCATCAATTGGAGCAGCTCCTGGTATGAATGGGTATCATGGATCAGGAGTGAAACTTGAAGAAAGTTCTGGTGCTTGTGGCTCTCCGGATGATGGCCTGTTAGACTCCAGCGAAGAGAGTCGACGACGTCAGAAAACATGTAGAGTATGTGGAGATCATGCGACGGGCTATAATTTCAACGTTATCACATGCGAATCTTGTAAAGCATTCTTCAGGAGAAATGCGTTACGTCCCAAGGAGTTCAAATGTCCATATTCTGAAGATTGCGAAATTAATTCTGTAAGCAGACGGTTTTGTCAGAAATGTCGACTGAGGAAATGCTTCACAGTTGGTATGAAAAAAGAGTGGATTTTAAACGAAGAACAACTGCGGCGGAGGAAA…	PVIHSPPSIGAAPGMNGYHGSGVKLEESSGACGSPDDGLLDSSEESRRRQKTCRVCGDHATGYNFNVITCESCKAFFRRNALRPKEFKCPYSEDCEINSVSRRFCQKCRLRKCFTVGMKKEWILNEEQLRRRKNSRLNNTGTCNKRSQPGNQQSPQGPNQQPHLSPHHPG	Z003_5397	Caenorhabditis_elegans	F11A1.3	zf-C4	zf-C4
77	15A03	pTH9109	TGTCACGGACCTACGGCGCGCCATGACGGCGGAAGGTAGGTA	TAGTGCACCACAATCCTGCAGGTAGGAACCTTAACCCCCTCCA	ATGACGGCGGAAGGTAGGTATTTGGAAATTAGAAAAAAAACTGTAAAATCAAAATTCCGATTTCCAGCTTCTTCCAGCTCCACGCGATGTCTAATTTGTTCAGCACAAGCCACTGGATTTCACTTTGAAGCTCAGTCCTGCTCAGCTTGTGCTGCATTTTTCCGGCGGACCGTTGCACTGACAAAAAGTTTCAAGTGCATCACAGGAAGGGATGACTGCAATGTTCATTATAGTATGCACCAAATCTGCAGAAGCTGCCGTCACAAAAAGTGCCTGAGCAATGGGATGAAGCCCGGTGGAGTTCAACCCAAAAAGCCAAACATTGAAACCGGAAGAGCATTTTTCACAAAATCAGGGCTCAAGAGAAATAAGAAATTCGCGAATGTGTCCCCGCAGACG…	MTAEGRYLEIRKKTVKSKFRFPASSSSTRCLICSAQATGFHFEAQSCSACAAFFRRTVALTKSFKCITGRDDCNVHYSMHQICRSCRHKKCLSNGMKPGGVQPKKPNIETGRAFFTKSGLKRNKKFANVSPQTADEQKLVVEGVKVPK	Z003_10153	Caenorhabditis_elegans	H10E21.3	zf-C4	zf-C4
78	15A04	pTH9110	TGTCACGGACCTACGGCGCGCCATGAATCGAAACTTTTCGATCGATG	TAGTGCACCACAATCCTGCAGGTATTTACATTCATATTGCTAGCTAGAT	ATGAATCGAAACTTTTCGATCGATGCTATTTTGGCTAGAAAACCAGTTGAAAAGAGAAAGCAAATAATCACTAAGGATAATTGTAAGTTTATTCGAGTTTTCCTACAATCAAGTAATTTATGGCGTCGTTTTCATAATCTTGGCACAGAGATGATTGTTACTAAAAGTGGAAGAAGAATGTTTCCTACCTTATCAGTCATCATCGCTGGTCTTGATCCCGTGAAGAGTTATGTAGTTATGGTAGATTTGGAGTGTATTGAAATGAAACGTTTTCGATATTCATTTCATCAAAGCAAATGGATTTCTACCGGTCCAGGGGAAAGTGAACTCCCGAGCAGAATGTTTGTTCACACGGACTCCCCAGCTCGTGGTGCTCATTGGATGCGGGCTCCTGTTAGT…	MNRNFSIDAILARKPVEKRKQIITKDNCKFIRVFLQSSNLWRRFHNLGTEMIVTKSGRRMFPTLSVIIAGLDPVKSYVVMVDLECIEMKRFRYSFHQSKWISTGPGESELPSRMFVHTDSPARGAHWMRAPVSFDKMKLTNNQLDNNGHIIVNSMHKYRPRVHIIEQDDSQKRHTFSFEETEFIAVTAYQNHRITSLKIESNPFAKGFRECEVQGIEMNSVGGMTGGPAFQSVFPLIFPYFANLASNMNVNK	Z003_10197	Caenorhabditis_elegans	H14A12.4	T-box	T-box
79	15A06	pTH9111	TGTCACGGACCTACGGCGCGCCATGGAAGCAGAGAGACAATACGA	TAGTGCACCACAATCCTGCAGGATCTTGATGTAGAGTTTTGATCCATTT	ATGGAAGCAGAGAGACAATACGATCCTTGTCAAGTTTGTCAGGATACTGCATCAACTCGCCATCATTTCGGAATAACTTCATGTACAGCATGTGCTTCATTCTTCAGAAGAACAACTATGAATCAATTCACATGTAATTTGGATAATAATTGTTCAGTTTCTTACAAAAAGAAATGGGTGTGCCGAGCCTGTAGGTATAACAATTGCATTAGAGCAGGAATGTCCAAAGATTACATTCGAAGAGGAAACGTTGACGAGACAAAAAATAGAAAAACGTTTCGAAAAAGGACAATCCGGAACTCAATTAGAAGAAACAAGAGCTCTCTGAATCGGATAAGTGAACCTGTGAAAATGGATCAAAACTCTACATCAAGAT	MEAERQYDPCQVCQDTASTRHHFGITSCTACASFFRRTTMNQFTCNLDNNCSVSYKKKWVCRACRYNNCIRAGMSKDYIRRGNVDETKNRKTFRKRTIRNSIRRNKSSLNRISEPVKMDQNSTSRS	Z003_10247	Caenorhabditis_elegans	H22D14.1	zf-C4	zf-C4
80	15A10	pTH9112	TGTCACGGACCTACGGCGCGCCTCACACATTTCTCCTCCAGCG	TAGTGCACCACAATCCTGCAGGGCTTTACAAACATCATGACCAATCG	TCACACATTTCTCCTCCAGCGTCGGACATTGATCCAGTTGACGAGTTCTTTCCACAGCTTGTGCACAATAATAAAATTCAATCATCTTCCTCCTCAACAGTTGAAACGACAATAACACGTGGGCGCAAAACTTCATCGGTATCGTCCGATTCGTCATCGGACTACCGTCATAAACGGGATAAGAACAATCTAGCATCCCAAAAATCTCGTCAAAAGCGCCAAGCCAAAATTCGCGAATCAAAGGAGGAAAGAGAGCGTCTAGAGAAGCGAAAAGTTCAACTTCAAGCAATGGTTTTAACCTTGGAGACTCAAGTCGAGGACTACAAGCGATTGGTCATGATGTTTGTAAAGC	SHISPPASDIDPVDEFFPQLVHNNKIQSSSSSTVETTITRGRKTSSVSSDSSSDYRHKRDKNNLASQKSRQKRQAKIRESKEERERLEKRKVQLQAMVLTLETQVEDYKRLVMMFVKR	Z003_10531	Caenorhabditis_elegans	K02F3.4	bZIP_1	bZIP_1
81	15B03	pTH9113	TGTCACGGACCTACGGCGCGCCATGAACAAAAACTGTTTGATTTGCCA	TAGTGCACCACAATCCTGCAGGCCAAAACATCTCCCAGACTCG	ATGAACAAAAACTGTTTGATTTGCCATCGAAAAGCAGCTGGGCAGCATTATGGGGTATTATCGTGCTTCGCTTGTAAAATGTTTTTCCATCGAATGGTCGTTGAGAACTTACATTACTGCTGCCAAAAATTCAATAAGTGCTACGAAAAGTTCATTATTCTTCCAAAGTGCAAAGCGTGTCGTTATCAAAAATGCTTAGAAATGGGCATGCAAGCCTTCCCTCGACGCGTGAAATCATTTGAAGAATCAATGGATTTAAAGATACAGCGAATGCTCATGAATCTCAGCGAAATGGATGAGCAAAGACATTGGAGAATGCTCAACTCGTATTCAATAGAGGATCCGAGTCTGGGAGATGTTTTGG	MNKNCLICHRKAAGQHYGVLSCFACKMFFHRMVVENLHYCCQKFNKCYEKFIILPKCKACRYQKCLEMGMQAFPRRVKSFEESMDLKIQRMLMNLSEMDEQRHWRMLNSYSIEDPSLGDVLV	Z003_10793	Caenorhabditis_elegans	K06B4.1	zf-C4	zf-C4
82	15B04	pTH9114	TGTCACGGACCTACGGCGCGCCATGCCTTCCCCAACTCATTTATTAA	TAGTGCACCACAATCCTGCAGGGTTGGTTCTCCTGCCGGTTA	ATGCCTTCCCCAACTCATTTATTAAACAATTTCGAAAGTTCTTCTTCCCAAGGACCACCTTCATATTGTCTGATTTGTTGTGAAGTTGCTGATGGACATCATTTTGGAGCAGCAGCATGTAGAGCCTGCGCTGCATTCTTCCGACGCACAGTCCAACTGAATAAGGTCCACGATTGTCCGAAAAATGGTCAATGTTTTATCTTATCAAATGTGCGTAACATGTGTAGAGCCTGTAGGTACGAGAAATGTCTCGAAGTGGGAATGCAACGATCATCTGTACAACAGAAACGTGATCAACTGGGGAGGCGAGACGGTTTACCGACGAACCGTGAAGAACCAGTTCTGGACACTATGCGGAGGGCGTATGAAAAGTTACTAGTTGTCAGGAAGAAGGTTCAT…	MPSPTHLLNNFESSSSQGPPSYCLICCEVADGHHFGAAACRACAAFFRRTVQLNKVHDCPKNGQCFILSNVRNMCRACRYEKCLEVGMQRSSVQQKRDQLGRRDGLPTNREEPVLDTMRRAYEKLLVVRKKVHNRQENQL	Z003_10795	Caenorhabditis_elegans	K06B4.11	zf-C4	zf-C4
83	15B05	pTH9115	TGTCACGGACCTACGGCGCGCCATGAAATGTTTAGTTTGTTGTTCGTAT	TAGTGCACCACAATCCTGCAGGTATCGTCCATACTTGGGTCCTC	ATGAAATGTTTAGTTTGTTGTTCGTATGCTAGCAGTAGGAATTTTGGCGCGTTATCATGCTCGGCGTGCAAAATGTTCTTCACTCGAGCAACGAAAAATTACGCAAAGTTTACCTGCAAATATGACAAAAAATGTTTCGAAAGCTTCACAATTCTTCCAAAGTGTCAATTTTGTCGATTCAAAAAGTGCCTAGAAATTGGAATGAGATTTTCGGAACCGAAACAGCAATTGTTTAACCTGAATAATTCGGTGGATCAAGATTTGATAATTCTACTCGGAAACCTTGCTGTGAAAGATGGTGTTCATTATTCCAACTTTTTAAACTTCTATTCTTTGGAGGACCCAAGTATGGACGATA	MKCLVCCSYASSRNFGALSCSACKMFFTRATKNYAKFTCKYDKKCFESFTILPKCQFCRFKKCLEIGMRFSEPKQQLFNLNNSVDQDLIILLGNLAVKDGVHYSNFLNFYSLEDPSMDDI	Z003_10798	Caenorhabditis_elegans	K06B4.2	zf-C4	zf-C4
84	15B12	pTH9116	TGTCACGGACCTACGGCGCGCCATGCCAAGACCCGGAAAAGA	TAGTGCACCACAATCCTGCAGGGTGGAAGATTTGGGAAAAGGGAG	ATGCCAAGACCCGGAAAAGACTCGTACGATGAGCAGAAGCCACCGTACTCGTACATTTGGCTCACCTATATGGCTATTCAGGACTCTGACGATAAAATGCTCCCGCTCACGGAGATCTACAAATATATTATGGATCGGTTTCCGTTTTATAGGAAAAACACGCAGAGGTGGCAAAACTCCCTGCGACACAACTTGTCATTCAACGACTGCTTCATCAAGATCCCAAGAAGAGCCGATCGTCCTGGGAAGGGCTCCTACTGGGCGGTGCACCCAAATGCCTCCGGAATGTTCGAGAACGGCAGCTGCTTACGGCGTCGGAAACGATTTCGGGCTCGCGGCGGCCAAGACGACGACGACGACGACTTCCACCACCCGGCTCCATCGAAAATCTCTCGCAAA…	MPRPGKDSYDEQKPPYSYIWLTYMAIQDSDDKMLPLTEIYKYIMDRFPFYRKNTQRWQNSLRHNLSFNDCFIKIPRRADRPGKGSYWAVHPNASGMFENGSCLRRRKRFRARGGQDDDDDDFHHPAPSKISRKNPLPLLPEPPITPPLLSSLFPNLPP	Z003_11308	Caenorhabditis_elegans	K10G6.1	Fork_head	Fork_head
85	15C02	pTH9117	TGTCACGGACCTACGGCGCGCCATGAAGGATGAATATAACTCGCAGG	TAGTGCACCACAATCCTGCAGGAGTTTGATGTCGGACCATCCG	ATGAAGGATGAATATAACTCGCAGGAGTGCATGGTATGCTCAGCTCCGGCCGATGGACTTCATTATGGTGCAATCAGCTGCCGTTCCTGCAACGCATTTTTCAGACGAACTGTTGTGGAGAAGGCGCTCTTTCAGGAGTACCGCTGCAAGCACACTAACACTTGCCTGATTGACCCGGATGGACGATGTGCCTGCAGATCTTGCCGGTTCACCAAATGCATCGAAGCGGGAATGAAAATTGGCGCTGTCCAGCCACGTCGTGACCCAACTGGCTCGCAGAAAGAGCGACGAAAACGTGCCGGAGGCGTTGGTGAGATGATGTCCATGAACAATAGCCCGTTGGAGCGAAACGGCAATAGCTTCTCGTCGGATGGTCCGACATCAAACT	MKDEYNSQECMVCSAPADGLHYGAISCRSCNAFFRRTVVEKALFQEYRCKHTNTCLIDPDGRCACRSCRFTKCIEAGMKIGAVQPRRDPTGSQKERRKRAGGVGEMMSMNNSPLERNGNSFSSDGPTSNS	Z003_11358	Caenorhabditis_elegans	K11E4.5	zf-C4	zf-C4
86	15D07	pTH9118	TGTCACGGACCTACGGCGCGCCGAATTTGAAACCAATTGGAGCAAACA	TAGTGCACCACAATCCTGCAGGTAGCCTGCCAATTGCTAACAG	GAATTTGAAACCAATTGGAGCAAACAATTCTATCTTCATTGTGCTGAGCACTGGACAGAGATACCGTATCGATGTGAAACGTGTCCGTTCACTTCAAATGAGATACAAGAGTTTTTGACCCATAGGCTTCAGCATACCGACGAGCGTTTCTTCAAATGCGGTGAATGTGCATGGAAAGGTCGAACTCGTTCTCAACTGTTTGCTCACGAACGAATGCATTCTGTACTCGATGATCGATCATTACACTGTGAAGAGTGTGGAAGAGGATTCCAACAGCATAGTACATTGGATCATCATGTTGCTAGTCATAATGATCCTAGGCCTTATATCTGTGAGGATTGCGGTTTCGCCACCAAAACCGCCGATCATCTTTCCCTTCATCGTCGTCAACATACTGGA…	EFETNWSKQFYLHCAEHWTEIPYRCETCPFTSNEIQEFLTHRLQHTDERFFKCGECAWKGRTRSQLFAHERMHSVLDDRSLHCEECGRGFQQHSTLDHHVASHNDPRPYICEDCGFATKTADHLSLHRRQHTGDNFSCHIAGCDYSSTKKSQLAAHLRTHMAVRAHLCKICGRGFIEKSHLVRHERIHLEEKPFKCDQCEYASSRRDKLKEHIIKHHNSEVLTFQKTQRRKYKRQRMLAAASNIVNNPDALFRPITSDDAVSNWQAT	Z003_12481	Caenorhabditis_elegans	R11E3.6	zf-C2H2	zf-C2H2
87	15D08	pTH9119	TGTCACGGACCTACGGCGCGCCATGGATCAAAACGGACCAGAATG	TAGTGCACCACAATCCTGCAGGGAGTTTTTGGGTTAGAAATCTGAGCT	ATGGATCAAAACGGACCAGAATGCGAGGTTTGCGGACTTGAGAGCCAGGGCTTTCACTTTGGAGTGCTTTCGTGTAGAGCCTGTTCGGCATTTTTCAGACGGACAGCTACTGTCCCAAAATGGCATCAGAAAAATTGCCAAAAACCAAGTAAATGTAAAAATGGAGAGGGTCAATATCACTGCAAGCCGTGTAGGCTCAAAAGATGCATTGCCGTTGGAATGAACACTGAAAATTTCCAATTTGACCGAGATGGCCTAGTTGCAAAACTCAAAAAGCCCAAGCTCCCAAAATCGTTCGAAATGTTTGTGGGACGGCCTGAATATGTGCTCTTCTGCACTCCTGGCACATCAGCTCAGATTTCTAACCCAAAAACTC	MDQNGPECEVCGLESQGFHFGVLSCRACSAFFRRTATVPKWHQKNCQKPSKCKNGEGQYHCKPCRLKRCIAVGMNTENFQFDRDGLVAKLKKPKLPKSFEMFVGRPEYVLFCTPGTSAQISNPKTL	Z003_12492	Caenorhabditis_elegans	R11G11.1	zf-C4	zf-C4
88	15E01	pTH9120	TGTCACGGACCTACGGCGCGCCATGAACGGATTACTGCATATGCAT	TAGTGCACCACAATCCTGCAGGCTTGCACTTCTCCTCCATCTTC	ATGAACGGATTACTGCATATGCATGGTCCAGCTGTCAAAAAGCTTTTAGGTTGGAAAATTGGAGAAGACGAAGAAAAATGGTGTGAGAAGGCTGTTGAGGCATTGGTGAAAAAATTAAAAAAGAAAAATAATGGATGTGGAACCCTCGAAGATCTGGAATGTGTTCTAGCAAACCCATGTACAAACTCAAGATGCATTACGATAGCAAAAAGTTTAGACGGTCGGTTACAGGTATCCCATAAGAAAGGTCTTCCACATGTGATTTACTGTCGAGTATGGCGGTGGCCGGATATAAGTTCTCCTCATGAATTACGTTCAATTGATACATGCTCCTACCCATATGAATCTAGTTCCAAAACCATGTACATCTGCATTAATCCATATCACTATCAGAGATTA…	MNGLLHMHGPAVKKLLGWKIGEDEEKWCEKAVEALVKKLKKKNNGCGTLEDLECVLANPCTNSRCITIAKSLDGRLQVSHKKGLPHVIYCRVWRWPDISSPHELRSIDTCSYPYESSSKTMYICINPYHYQRLSRPQGLNSSMPSPQPISSPNTIWQSSGSSTASCASSPSPSVFSEDGGEVQV	Z003_12603	Caenorhabditis_elegans	R13F6.9	MH1	MH1
89	15E09	pTH9121	TGTCACGGACCTACGGCGCGCCATGCAAATCGCGACAAGTTCA	TAGTGCACCACAATCCTGCAGGGTTCCAAGAAAATGATAAAGTGAGGAC	ATGCAAATCGCGACAAGTTCAACGTCACCATCAATTTTCTACACTCCTTCAATATCACCGATGGAGGAGGACATGAACTGCCAGGAGCTGGTGGTAAATCTCTATACATGTCAAGTTTGTGCGCTTCCGGCTCACGGCAATCACTTTGGTGCGATCAGTTGTCGTGCGTGTGCGGCGTTTTTTAGAAGAGCCTGCACGGGCACAAAAACCACCTACAAATGCAAAAAGCAGAATAACTGTGATATTTGGGAAAACGGGCGGTACAAATGTAAAAAGTGTCGGCTGGACAGGTGCAATGAGGTTGGCATGGATCCGGGAAGATTCCAATTCGATCGGGACCTCATATCGGCAACCGAAAAGTATCCGAATAGCAAAAATTTTCGAAGAACATTTGGAATG…	MQIATSSTSPSIFYTPSISPMEEDMNCQELVVNLYTCQVCALPAHGNHFGAISCRACAAFFRRACTGTKTTYKCKKQNNCDIWENGRYKCKKCRLDRCNEVGMDPGRFQFDRDLISATEKYPNSKNFRRTFGMSRLPETIEHFLGRPHFIIFLER	Z003_12815	Caenorhabditis_elegans	T01G6.8	zf-C4	zf-C4
90	15F09	pTH9122	TGTCACGGACCTACGGCGCGCCACTGGAGATGGTTTCAACGCT	TAGTGCACCACAATCCTGCAGGGATAGTGAACTTGAAGTCCTCGTC	ACTGGAGATGGTTTCAACGCTGATAAATCACCAAAATCAGAGTCACCTGATCCTTATTTAAAATCGTCCGGACCGTTGGTTCAACCATGCATGACATCAAAATCGCCCAGCTATAACTTGCTTCAGAGAAATCGGTTGCAAACGTCAAGATTTGCGTGTCCCCAACAAGACTGCTTCTGGCGTGGTACTAATGAAATGTCAATGAAAAAACACATGTTAGTTCATGGTCCAAAGCAGCCAGTTATATACGACAAAACTGGTGAGGCAATGAAAGTTCAGCTGGTTCAGCCAAAACCCAAAGGAGTGAAATGTAGTGAATGTGACACATTCGCATATTCCCGCCCTCTCCTACTTCGTCATATGTATGACTCGCACGGAATTGAAGCTCCTCTTGTTAAA…	TGDGFNADKSPKSESPDPYLKSSGPLVQPCMTSKSPSYNLLQRNRLQTSRFACPQQDCFWRGTNEMSMKKHMLVHGPKQPVIYDKTGEAMKVQLVQPKPKGVKCSECDTFAYSRPLLLRHMYDSHGIEAPLVKRTFANREMLQSWLDSLRETHAVEFVVSSGSKKWGRGLQVHYL	Z003_13536	Caenorhabditis_elegans	T09A5.12	zf-C2H2	zf-C2H2
91	15F12	pTH9123	TGTCACGGACCTACGGCGCGCCATGAAGATTACTTTTTCTCCGGAACT	TAGTGCACCACAATCCTGCAGGAAGCATTATGTGGATTAAATTGTTTGA	ATGAAGATTACTTTTTCTCCGGAACTTTCAATTCCCTGCGAAGTGTGCAAAAATCAATCAAACGGATACCATTTTGAAGTTTTATCTTGCGGAGCGTGCGCATCGTTTTTTAGAAGATCTGTCGTTTCCAAAATAAAGTATCAATGCAAGGACGGAAAAAAGCGCTGTCAAATTAGATACTTGGACAGGCATTTCTGTAGGTACTGCCGATTCAGCAAGTGTGTAAAAGCAGGGATGAAGGCTGAAAAAATTCAAAAGAATCGCGATCTAGATTCTTCCCCCACTCCAACTGACCAGAATAATTGTATCCCTAGTGATGTACTGCATGATGACGGAATTTTGATTAAAGACATTCGAGGTCTTTTCAAACAATTTAATCCACATAATGCTT	MKITFSPELSIPCEVCKNQSNGYHFEVLSCGACASFFRRSVVSKIKYQCKDGKKRCQIRYLDRHFCRYCRFSKCVKAGMKAEKIQKNRDLDSSPTPTDQNNCIPSDVLHDDGILIKDIRGLFKQFNPHNAS	Z003_13874	Caenorhabditis_elegans	T13F3.3	zf-C4	zf-C4
92	15G02	pTH9124	TGTCACGGACCTACGGCGCGCCCAAAGTCAGCCAAAACCTTCTTCT	TAGTGCACCACAATCCTGCAGGTAGCATTATTACTCGAATTAAAATTAA	CAAAGTCAGCCAAAACCTTCTTCTAAAGCGTCATTGGACACTAGCTCAAACGCCTTTAAGAAATATGTGAACCCATTTGCACCTGAAGCTACAGTACCCCTGCCTGTTGAACTTGAAGATCAATACGGACCATATAGCTCATCAGTTTGGAAACGAAACGAACGTGAGCGATGTCGAGTGAGAAATGTGAATGATGGTTATGAGAGACTGAGAAAACATCTTCCAGTTCATTTTGATGAAAAGCGAATCTCAAAAGTTGACACTCTCCGGCTTGCAATCCGTTATATCAAACATTTGGATAACTTATTGAGGAGCGAGCTTCATCAGTATAACTGCAAGTGCTTCAATGGATTCCAAGAGGAGTCCGAAGGAAATATTTTAATCGATATTTCTACGTTT…	QSQPKPSSKASLDTSSNAFKKYVNPFAPEATVPLPVELEDQYGPYSSSVWKRNERERCRVRNVNDGYERLRKHLPVHFDEKRISKVDTLRLAIRYIKHLDNLLRSELHQYNCKCFNGFQEESEGNILIDISTFNFNSSNNAM	Z003_13976	Caenorhabditis_elegans	T15H9.3	HLH	HLH
93	15G10	pTH9125	TGTCACGGACCTACGGCGCGCCCTACCATACTCACTTGGGACAAATTAT	TAGTGCACCACAATCCTGCAGGCCAAGTCCATTTGTAGATCTGATGG	CTACCATACTCACTTGGGACAAATTATGGAAGCGATGGTCAATTATTTAACAATTGCTCACCAAATTCCAGTGGTAAGAGCACGCCTGGTAACACATCAGTAACTAGTGAAGTAGCAACTCCACGACCACAGGCCAAATCACCAAACCATATCAAAAGACCAATGAACGCATTCATGGTATGGGCTCGTGACGAGAGACGAAAAATTTTGAAAGCGTATCCGGATATGCACAACAGCAACATCTCGAAGATCCTCGGATCTCGTTGGAAAGGTATGAGCAATTCCGAGAAACAGCCATACTATGAAGAGCAATCACGGCTGAGCAAATTGCACATGGAGCAGCACCCGGACTATCGGTACAGACCACGTCCGAAGAGAACATGTGTGATTGATGGAAAG…	LPYSLGTNYGSDGQLFNNCSPNSSGKSTPGNTSVTSEVATPRPQAKSPNHIKRPMNAFMVWARDERRKILKAYPDMHNSNISKILGSRWKGMSNSEKQPYYEEQSRLSKLHMEQHPDYRYRPRPKRTCVIDGKKVRVNEYKTIMKTKKDLMWGDEPGFSQPSDLQMDLA	Z003_14351	Caenorhabditis_elegans	T22B7.1	Sox	HMG_box
94	15G11	pTH9126	TGTCACGGACCTACGGCGCGCCTTGTACCCATCTAAAAGAAAAATGATG	TAGTGCACCACAATCCTGCAGGCTCCTTTTAAAGTGAATTCGTATGGC	TTGTACCCATCTAAAAGAAAAATGATGGTAGGGTCAAAAAATCGAAAAAGGACTATAAAGCCAAATCGGGATACTATCGCAGAAGAGCAAGAAACTGACGGAGAACACGGAGTAAAGCAAAGAGCATTTGATCCAAAGCAAAGACATCGTCAATGTCCAGAATGTCTACTTCTTTTCTCAACTCCGGACAAACTGAAGCGTCATATGAAATCGCATGGAGACGTTCCAGATGTATACTGCTCACTTTGTAACACTCCTATTAAGTTTAAGTATAATTTGAGAGTGCACCTAGAGAAGTGTTATGATAAAATGAAACTCAGTCTACATGATAGTATGCTCTCAAAGGTGTATCCTGATTTCGTGCGAAAACTTCAAGAAGCTGCAAAAAATCCCGTTCTC…	LYPSKRKMMVGSKNRKRTIKPNRDTIAEEQETDGEHGVKQRAFDPKQRHRQCPECLLLFSTPDKLKRHMKSHGDVPDVYCSLCNTPIKFKYNLRVHLEKCYDKMKLSLHDSMLSKVYPDFVRKLQEAAKNPVLPMPTLEGMPYEFTLKGV	Z003_14371	Caenorhabditis_elegans	T22C8.3	zf-C2H2	zf-C2H2
95	15H01	pTH9127	TGTCACGGACCTACGGCGCGCCCCTCCTGACTCTCCGGCAT	TAGTGCACCACAATCCTGCAGGCTACGACAACTATATTATGCACCGAT	CCTCCTGACTCTCCGGCATCCACATCTGCAAGCTCATCTTCATCTAGCATTGGAGCCAATGAGTTGACCACCAAGAGAAGAAAATGCGAGAGATGCACATGCCCGAATTGCAAAGCCATAAAGCATGGCGATCGAGGGTCTCAACACACTCACCTGTGCAGTGTCCCTGGTTGTGGAAAAACATATAAAAAGACAAGCCATTTAAGAGCACATTTAAGGAAGCATACCGGAGACCGCCCATTCGTTTGCGATTGGTTTGATTGTGGAAAGAGATTTGACAGAAGTGATCAACTGATCAGGCATAAGAGGACGCATACAAAAGAATATAGATTTGCTTGCAAATTTTGCATTCGCCAATTTTCTCGTTCCGATCATCTTCAACAACACTTGACATCGGTG…	PPDSPASTSASSSSSSIGANELTTKRRKCERCTCPNCKAIKHGDRGSQHTHLCSVPGCGKTYKKTSHLRAHLRKHTGDRPFVCDWFDCGKRFDRSDQLIRHKRTHTKEYRFACKFCIRQFSRSDHLQQHLTSVHNIVVVD	Z003_14373	Caenorhabditis_elegans	T22C8.5	zf-C2H2	zf-C2H2
96	15H05	pTH9128	TGTCACGGACCTACGGCGCGCCGAAATTCAAGCAGAAATCGCAGTT	TAGTGCACCACAATCCTGCAGGCTCCGATATTCACAAAAGATTGCAAG	GAAATTCAAGCAGAAATCGCAGTTGTCGACGGAGAGGAAGTGATCTTTGCGGATGATGACGAATATATAGAGTACGACCCGTTGAGTATAGCCAATGATCGGAATGCTGTGTATGACATATACCAACCACACGAGTCTGAAAATGGAACATTCATGTGTAAAATTTGCATGCGAACTGGAAAAAACACGGAATACGAGGACAGATCGACGTTTGTAGCTCATCGATACAAATGCCATGGAAGTTTTAATAACAACGTAATGTGTCCCCTTGGAGACTGCCGGGAAGTTTTCGCTTCTTTGTACACCCTTCGACGCCATCTTAGCCAGCAGCATGAGCTTCCGATAGAAATTCACTTGCAATCTTTTGTGAATATCGGAG	EIQAEIAVVDGEEVIFADDDEYIEYDPLSIANDRNAVYDIYQPHESENGTFMCKICMRTGKNTEYEDRSTFVAHRYKCHGSFNNNVMCPLGDCREVFASLYTLRRHLSQQHELPIEIHLQSFVNIGE	Z003_14586	Caenorhabditis_elegans	T24C4.7	zf-C2H2	zf-C2H2
97	15H07	pTH9129	TGTCACGGACCTACGGCGCGCCACTGATTATCGTGTAAATCGGCG	TAGTGCACCACAATCCTGCAGGTTGGCATTACTTGTGCAGCTG	ACTGATTATCGTGTAAATCGGCGGAGACGCTTATCCCCTTCCCACGACGACGGAGACTTTGACCCGAGATCAAAACGGCCATACTATGGAGGACGAGGAGGATTCCGGGGTGGCTTCCGGAATGGAGCGAAGCCAAGATTTCAAACAGAACATCAGATCTGCAAGTTTTTCCGAGAAGGTTATTGTAGAGACGGTGACAATTGTTTGTACTCTCACCAAGCCGAAGATTCACTGAGACGGCCTGTTCTGTGCAACTTTTATGCTAATAGTTTTTGTAAAAAGGGTCTACAATGTCTTATGCTCCATGGAGAATTCCCATGCAAATCCTTCCACAAAGGACAATGCAACCATGATCCATGTAGATTTTCTCACGTTCCCCTGACGGACTATACCCGACCA…	TDYRVNRRRRLSPSHDDGDFDPRSKRPYYGGRGGFRGGFRNGAKPRFQTEHQICKFFREGYCRDGDNCLYSHQAEDSLRRPVLCNFYANSFCKKGLQCLMLHGEFPCKSFHKGQCNHDPCRFSHVPLTDYTRPIIEKILADEEARQAHQAQQAQTYRQNPVANAAAAAAAAQVMPR	Z003_14720	Caenorhabditis_elegans	T26A8.4	zf-CCCH	zf-CCCH
98	15H09	pTH9130	TGTCACGGACCTACGGCGCGCCCTTGATGAAGTAGAAGACGAGGAAG	TAGTGCACCACAATCCTGCAGGGATAAAGCATCATAATTGATGGATTCA	CTTGATGAAGTAGAAGACGAGGAAGATGTGGAAGTTGATGTTGAAGACGTGGATGACGTGGATTTATCATCAATTCCATCGAAAAGTCCTGAAAGATCAAGGGGTCGGCCGAAGATTGGCTTGAAAATGAAGGAAGGAAATCTACCAATCGAGTGCAAATTAGAGGGGTCCGAGCTATGGGCGAAATTCTTCGATTTGGGCACAGAGATGATTATCACAAAAAGTGGAAGGCGAATGTTCCCAACAGTTAAAGTTTCCTTCACAAATGTAATACTAGATGCTCTATATTATATCTTCCTAGATGTAGTCCCAGTGGACTCCAAAAGATACCGTTACATCTACAACAAATCAGCTTGGCTCACAGCCGGTAAAGCGGAGCCTGTGCCAAAAAATCGATAT…	LDEVEDEEDVEVDVEDVDDVDLSSIPSKSPERSRGRPKIGLKMKEGNLPIECKLEGSELWAKFFDLGTEMIITKSGRRMFPTVKVSFTNVILDALYYIFLDVVPVDSKRYRYIYNKSAWLTAGKAEPVPKNRYYLHPDSPFTGDQLLKHVISFEKTKLTNNEVDKTGHLILNSMHKYQPRIHIVQRQKANPLDPNKVVMSEEKHCTYTFPETQFMAVTAYQNQLITKLKIEKNPFAKGFRDPTGRSPDEMERSPGDMMLSNFYHSSALQQAMFQQCLSKTLQLNPSIMMLYQ	Z003_14801	Caenorhabditis_elegans	T27A1.6	T-box	T-box
99	15H12	pTH9131	TGTCACGGACCTACGGCGCGCCATGCATCCGGATTCATCTAGAAAAC	TAGTGCACCACAATCCTGCAGGTTAAATCGATGAATTTGTTCTGTGAAG	ATGCATCCGGATTCATCTAGAAAACTAGCACTGAAAGCTGTGGTTAATCAAACTTTTTGTCAAGTTTGTGGTCAGGAATCTCATGGTGCTCATTTTGGAGCAATAACTTGCAGAGCATGTGCCGCGTTTTTCAGACGAGTAGCAGCAGGCGCAAATTTTGAAGTGAAATGCAAGGATGGAAGAGGAAGATGCAAAATTTTGACGAATGGAAGGTCATGTTGTAAGAAATGCCGTTTGAAAAAGTGCAAGGATATTGGAATGGATATTCAAAATTTCCAATTCAACCGCGACTCATTTGCCACCTCTACAAAAGTGGCACCATCATTATCCACATTCCTTGGAAGACCTGAATTCCTGTTGTCATGCAGTCCAGGTACTTCTGCTTCAACTTCACAGAAC…	MHPDSSRKLALKAVVNQTFCQVCGQESHGAHFGAITCRACAAFFRRVAAGANFEVKCKDGRGRCKILTNGRSCCKKCRLKKCKDIGMDIQNFQFNRDSFATSTKVAPSLSTFLGRPEFLLSCSPGTSASTSQNKFIDLS	Z003_14819	Caenorhabditis_elegans	T27B7.1	zf-C4	zf-C4
100	16A05	pTH9132	TGTCACGGACCTACGGCGCGCCAATCTGCCTGTTTTGCCATTTG	TAGTGCACCACAATCCTGCAGGAATGGTTGATTTGATTATTGAGTTGCA	AATCTGCCTGTTTTGCCATTTGAAAGTTCTGCTTCTTTGGGAACATCTACCACATCCAGCTCGAGATGCTCTTCAACTGAAAGTTCTGCTGCTCCTGGTAAAATCCGTCGTGGTCGACCACAACAAGAAATTGCAGATGGACAAGATGCTCACAGTCAAAAGAAGCGTCATCGCCGTCTTTATGCTCGCCAGTACCGTGCTCAAATGCGCCAAAAGGTGGAGAATGTGAAAAGTCTTCATGATGAGAAGGAGCAACTCGAGTTGGAAGTAAAAGCTCTCCGGCAAGCAGTTAGTGGTCTTCAACAAGAAAATGCTCAAAAAGATTTCTTGATCAGTATTTTGCAACTCAATAATCAAATCAACCATT	NLPVLPFESSASLGTSTTSSSRCSSTESSAAPGKIRRGRPQQEIADGQDAHSQKKRHRRLYARQYRAQMRQKVENVKSLHDEKEQLELEVKALRQAVSGLQQENAQKDFLISILQLNNQINHS	Z003_14878	Caenorhabditis_elegans	T27F2.4	bZIP_1	bZIP_1
101	16A06	pTH9133	TGTCACGGACCTACGGCGCGCCTCGGACTTGTGCCTCGACT	TAGTGCACCACAATCCTGCAGGGGAGGTTTTGCATATTTTGAAGATACA	TCGGACTTGTGCCTCGACTTGGACAGCTCAACTTCCAGCTCTTGCTCCGTTTCACCAGCTTCTTCCTTCCACACCCGCTCTGAATCAGTCGGTCAACAACAGTCTGGTAGAAATTCACCAGTCTCAAGCTCCACCGAATCACCAACCAAAAGACCAAAATACTCGTACAATGCATTGATCGCCATGGCTATTCAGAGCAGTCCATTCAAAAGTTTGAGAGTCTCCGAGATCTACAAATATATTTCTTCCAACTTCTCCTACTACAAAAACCAGAAGCCACTTCAATGGCAAAACTCGGTTCGCCACAACTTGTCTTTGCATAAAGAGTTCCGAAAGGTTCGAACTTTGGATGGAAAAGGCAGCTACTGGGCAATGACTGCGGATTTAGGAACTGATGTT…	SDLCLDLDSSTSSSCSVSPASSFHTRSESVGQQQSGRNSPVSSSTESPTKRPKYSYNALIAMAIQSSPFKSLRVSEIYKYISSNFSYYKNQKPLQWQNSVRHNLSLHKEFRKVRTLDGKGSYWAMTADLGTDVYISNNCGKLRRQKSKVAKFPPMQQHFPIPQLPTQNIHQLCMQNPQILATLLQNMYLQNMQNLQ	Z003_14989	Caenorhabditis_elegans	T28H11.4	Fork_head	Fork_head
102	16A09	pTH9134	TGTCACGGACCTACGGCGCGCCATGGAGTATCTAATCAAATGCCCAAT	TAGTGCACCACAATCCTGCAGGATAAACGATACATAACAATTCGACCG	ATGGAGTATCTAATCAAATGCCCAATTTGTGAATACTCTTCTAAAAAATCTGCCAACGTTATTCGTCATCTCGAAAGCAAGCACAAAGCGAACTCCACTCATATCGATGAATTCAGACGACGGTTGGCATCAAGCAGAGCTCACGAACTTCGTGGAATCAGAGCCTGGACATGTGGTTTGTGCGGAACAACTATTCCATCAAAGTTGGGACTTGAAAGACACATCTATCGACGTCATCGGATGGAATATGCAACGCGAGAAGGGAAATCTTTACTTATGAGGAAAGCCTATGCAGAACAACCAATTGAAGAGTCTCTAGTACTACCGCAAGCAACAACAGCTCGTCCGAACATGCGAAGAACGACTGGATGTGTTGCGTGCCCAGTAGAATACTGTCAA…	MEYLIKCPICEYSSKKSANVIRHLESKHKANSTHIDEFRRRLASSRAHELRGIRAWTCGLCGTTIPSKLGLERHIYRRHRMEYATREGKSLLMRKAYAEQPIEESLVLPQATTARPNMRRTTGCVACPVEYCQYLFQTRANLAEHFTEHHYLGSQLEKHSFASEAEFQTWLQEKDEQTCTAWKKRSSRDIGGRIVMYRLC	Z003_15139	Caenorhabditis_elegans	W02D7.6	zf-C2H2	zf-C2H2
103	16B03	pTH9135	TGTCACGGACCTACGGCGCGCCCACTTTGAGAATATGGCTCCACTG	TAGTGCACCACAATCCTGCAGGTCTTCCGCTTGCAGAATTTACAC	CACTTTGAGAATATGGCTCCACTGAACATGCGAGCCGGTCATCCAATGAATCAGATGGGAATGCCACCATACATGCATCCATCATCAATGGCTCCACAGAATGTCGATCGAAGGGCTCAAGGAGGTGGAAAAGCGAAGAAGGATGATCATGTGAAGAAGCCATTAAACGCGTTCATGTGGTTTATGAAGGAAAATCGAAAAGCACTGCTGGAAGAGATTGGAAATAATGAGAAACAGAGTGCAGAGTTGAATAAAGAGCTTGGAAAGAGGTGGCATGATTTGTCGAAGGAAGAACAGGCGAAATATTTTGAAATGGCAAAGAAGGATAAGGAAACACACAAGGAACGGTATCCGGAGTGGTCGGCGCGGGAAAATTATGCGGTTAATAAGAAAAAGACG…	HFENMAPLNMRAGHPMNQMGMPPYMHPSSMAPQNVDRRAQGGGKAKKDDHVKKPLNAFMWFMKENRKALLEEIGNNEKQSAELNKELGKRWHDLSKEEQAKYFEMAKKDKETHKERYPEWSARENYAVNKKKTKKRRDKSIPSENNDQKKCRARFGVNNTEMWCKFCKRKK	Z003_15600	Caenorhabditis_elegans	W10C8.2	Sox	HMG_box
104	16B10	pTH9136	TGTCACGGACCTACGGCGCGCCCCACCTGGAAAGGAGTCTGC	TAGTGCACCACAATCCTGCAGGAAGCCACAGTTGACATTACTGG	CCACCTGGAAAGGAGTCTGCTGGAGCATCTGGGGAGCCACCAAAAGAGGAGATTAAGACTGAGATTGAGTCCATTTCGACGCCCGGCCTGAAAATTGATCAGTATCAGAAGCAGGCCATCGCGATGAGAACAAAAGGAGCCCCACCAGGCCGTGATTGGACCGAACAGGAGACGTGTTTGCTGTTGGAAGCATTGGAAATGTTTAAGGATGACTGGAATAAGGTTTGCGACCACGTCGGCACTCGAACTCAACACGAATGTGTTCTAAAATTCCTTCAACTCCCAATTCAAGACCCATATCTAACTGAAAATCTGTCGTCGGATAAAGCTGAAGCAGCTCCCGGCGGAGCAGCCAAAGAAGTACTCGGACCACTTGCATTCCAGCCTGTTCCATTTTCT…	PPGKESAGASGEPPKEEIKTEIESISTPGLKIDQYQKQAIAMRTKGAPPGRDWTEQETCLLLEALEMFKDDWNKVCDHVGTRTQHECVLKFLQLPIQDPYLTENLSSDKAEAAPGGAAKEVLGPLAFQPVPFSQSGNPVMSTVAF	Z003_15896	Caenorhabditis_elegans	Y113G7B.23	Myb_DNA-binding	Myb_DNA-binding
105	16C04	pTH9137	TGTCACGGACCTACGGCGCGCCATGGAATTAGAGCCATGTTCAAGC	TAGTGCACCACAATCCTGCAGGTGATATTTCTCCTCAAAAAGAGCACT	ATGGAATTAGAGCCATGTTCAAGCTCCCCGGAGCGGTGTAAAGTTTGTGGTGACACGGGGAATGGTATGCATTTTGGAGCATTCACCTGCCGGGCTTGTGCTGCTTTTTTTAGAAGAGCCGCCAGCCGAAAATTCCTGAGAAAATGTGAAAATCACTTGATTTTTGCACTGAAATGCAAAAATTGCCGACTTCAGAGGTGTTATGAGGCTGGGATGAGCTCGGAGAATTTCCAGTTTTGCCGGGACCTCATTGGCGCGAAGGGAGCAATTCCGAAATTGAAAGTTCCTAAGAGTTTTGAACAAACAGTTGGGCGACCATATTTCGTGCTCCAGTGTGACCCGGAAGTGCTCTTTTTGAGGAGAAATATCA	MELEPCSSSPERCKVCGDTGNGMHFGAFTCRACAAFFRRAASRKFLRKCENHLIFALKCKNCRLQRCYEAGMSSENFQFCRDLIGAKGAIPKLKVPKSFEQTVGRPYFVLQCDPEVLFLRRNII	Z003_16035	Caenorhabditis_elegans	Y17D7A.3	zf-C4	zf-C4
106	16C08	pTH9138	TGTCACGGACCTACGGCGCGCCATGGTGCCAGGACCAAAGA	TAGTGCACCACAATCCTGCAGGATGACGTGGCAGGCTCTTT	ATGGTGCCAGGACCAAAGAAAAGAGCCCCGAAACCCTGCCTAGTGTGCGGAATCGAAAAAGGCACCCTCCACTTCGGATCCGTCGTCTGCATGGCCTGCGCCTCGTTTTTCCGCCGCACCGTCTCGTTTCACATTCGATTCTTGTGCCGATACTCCAACAATTGTCAGATTTCACAAGATCTTCGATTCATCTGCAGATCCTGTCGATTTGACAAGTGCGAACGAGTCGGAATGAGAAGGGATTTGGTGCAACAAAAACGGAATGAGAATAAGCTTCCGAAATACGTGCTCGAGTCCAGAAAAGGTGGTGCCGGGGAAGTAGTCCGTGGATACATCACATCAGCGTACACCGCAGAACCAAGACGTCTCAAAGAGCCTGCCACGTCAT	MVPGPKKRAPKPCLVCGIEKGTLHFGSVVCMACASFFRRTVSFHIRFLCRYSNNCQISQDLRFICRSCRFDKCERVGMRRDLVQQKRNENKLPKYVLESRKGGAGEVVRGYITSAYTAEPRRLKEPATSS	Z003_16507	Caenorhabditis_elegans	Y38E10A.18	zf-C4	zf-C4
107	16C12	pTH9139	TGTCACGGACCTACGGCGCGCCCATATGGTGGAAGATTTCTTGGATCC	TAGTGCACCACAATCCTGCAGGATAAAATCTCATCAGAAATTGCAGAAA	CATATGGTGGAAGATTTCTTGGATCCATCCGCCGCTGATTTTCTCGGTCACCTGGAGCCGTCTACGTCATCGCAGGATTTCATCTACTATGATGACGTGGCATTAGACACTACTACGTCATCGTCGTTCGTCACGTCACAACCTAGAGAATTGTACTGTTTTACGTGTGGAGATGCATTTAACAATCGGAAAGGGCTTTACAGACACGGAAAAACCGCCGAACACGCGACACGACCTCCTCGCCGAAAAATTGAGCGAAAAATTCAAATTCCCGCCGAACCGCCAGAAAAACCACCGGAAATTCCGAAAAAATCGATAAAAATCTGCGGGGAAAAATCGATTTGTGCGGAATGTTCGGGGAGTTTTCCTAATCGAAAAGCACTTTACAGACATGGAAAA…	HMVEDFLDPSAADFLGHLEPSTSSQDFIYYDDVALDTTTSSSFVTSQPRELYCFTCGDAFNNRKGLYRHGKTAEHATRPPRRKIERKIQIPAEPPEKPPEIPKKSIKICGEKSICAECSGSFPNRKALYRHGKQTNHQTHFQRGMNIKGGSIRCEKCEYSSDSEKNLKRHCQRNHSKFSAISDEILL	Z003_16673	Caenorhabditis_elegans	Y39B6A.46	zf-C2H2	zf-C2H2
108	16D09	pTH9140	TGTCACGGACCTACGGCGCGCCTCGAACAGTGGAAATGATTCGG	TAGTGCACCACAATCCTGCAGGGAGCCACAACAGAAGCCCC	TCGAACAGTGGAAATGATTCGGATATGATGGGAGATCACGATTTGACATGTCGTTGGAAGTCGTGTAACTCTAGTTTCCAGACTCTCAAGGCACTAGTGGATCATGTTCAAGAAAGTCACGTCCAATCAACTGAACAAGAACATCACGCATGGCGTTGTGAGTGGGAAGGATGTGATCGAAATGAGACGTTCAAAGCATTGTACATGCTCATTGTGCATGTTCGACGTCATACAGGCGAGAAGCCCAACAAGTGTGAGTATCCTGGATGCGGAAAAGAATACAGTCGACTCGAAAACCTGAAAACCCACCGGAGAACTCATACAGGCGAGAAACCATACAAATGCGAGTTTGCCGACTGTGAGAAGGCGTTCAGCAACGCGTCGGATCGTGCCAAACAT…	SNSGNDSDMMGDHDLTCRWKSCNSSFQTLKALVDHVQESHVQSTEQEHHAWRCEWEGCDRNETFKALYMLIVHVRRHTGEKPNKCEYPGCGKEYSRLENLKTHRRTHTGEKPYKCEFADCEKAFSNASDRAKHQNRTHSNLKPYSCQIPQCTKSYTDPSSLRKHIKAVHGDDEYEKAKKSRPANYSNRRRPDHRLAPPTGAMSHPYLATPNSGASVVAH	Z003_17179	Caenorhabditis_elegans	Y47D3A.6	zf-C2H2	zf-C2H2
109	15A05	pTH9141	TGTCACGGACCTACGGCGCGCCATGATCGAACCGACATTCAACC	TAGTGCACCACAATCCTGCAGGGTCGCTTTTCAGCCATCATCA	ATGATCGAACCGACATTCAACCTACGTCTCATCGAAGCCGTCCGTCATAGTCGATGCCTTTTCGACAATACAGACCGACAATACCGTAATACAGAATACAAAAATCGAGTTTGGCAGCGTCTGGTTACTGTACTCGGTTTTGATGGTGATCCGAGAATGTTATCTGCGAGATGGAAGCAATTAAGAGATAAATATGGAAAAGAGAAGAGAAAACAAAAATATGGAAATGAGAAATCATCATGGCAATATTTCAAACATCTTCATTTTCTAGATCCACATATGACAGATCGAGCAGAAATATCACCATCTCGAAAAGAGCCAACTGGAGTTCATGAAAAGATTGCTGAGCCATGTTTTGGAAAAAATCTAATTCTTGAAGTGAGAAGGCATCCGTGTCTT…	MIEPTFNLRLIEAVRHSRCLFDNTDRQYRNTEYKNRVWQRLVTVLGFDGDPRMLSARWKQLRDKYGKEKRKQKYGNEKSSWQYFKHLHFLDPHMTDRAEISPSRKEPTGVHEKIAEPCFGKNLILEVRRHPCLYDVRDPKYRHGDCRTQAWGMIIDKLRYPGTVPSIYKQWKKHRDRYVREKRRLRNLGDPNVQDVSTWEMYDDMAWIDQHLDEQQLSRCARSLKRGGNNDGGNQDEMSDYGDYDDDINYVMMAEKRP	Z003_10235	Caenorhabditis_elegans	H20J04.3	MADF_DNA_bdg	MADF_DNA_bdg
110	13F01	pTH9142	TGTCACGGACCTACGGCGCGCCATGACACAAATCGGTCTCTACCC	TAGTGCACCACAATCCTGCAGGATGGCTGTGGAGATGTGTTGA	ATGACACAAATCGGTCTCTACCCTTCTGCGCTTACTAAGCCATTCGAATTGTCACTGTCAGCAATCAAATCTGTACTGGAGCCAGAGAATCCATCATATTCAAAACGTGTTCCAAACTGTCAAAAGTGCGGTCAGCATGGTCGTAAATCACGCCTGAAGGGACACAAAAGAAGTTGCCCATTCCGCGAGTGCCCGTGTGCAAAGTGTGCTGTTGTATCCGAACGCCAGAAGCTCATGGCAGATCAAATCAAGATTCGTCGCCGCCAAAGAAAGGATACATTGCTGACTTTCGCCAAAAATAGTATCACATCAACTATGTTTCCAAGCAATCAAATCAGTCTCAATGCATTGAACTCATTGCTTTATGGTTCTATCAACACATCTCCACAGCCAT	MTQIGLYPSALTKPFELSLSAIKSVLEPENPSYSKRVPNCQKCGQHGRKSRLKGHKRSCPFRECPCAKCAVVSERQKLMADQIKIRRRQRKDTLLTFAKNSITSTMFPSNQISLNALNSLLYGSINTSPQPL	Z003_3034	Caenorhabditis_elegans	C34D1.1	DM	DM
111	16G03	pTH9143	TGTCACGGACCTACGGCGCGCCCAAACTGGCGAGCAAGATTTAGA	TAGTGCACCACAATCCTGCAGGTACTGTAGGATGAGGGGTACTGT	CAAACTGGCGAGCAAGATTTAGATATGGAACGAGAAAATGATATGGATCAGAACTCCAAGAATTCTACACAAAAGCCTGTAAAACGAGAAAAACGGAGATATAGATGCCGAAAGCGGAGCCCAGCGACAATCGAACGAGCAAAAACCGTCAGAAGAGATAAGGCTAATGCTCGAGAACGTCGGAGAATGAATAGTTTGAATGATGCGTTGGAGCATCTACGTGGCATACTTCCAGCTCTTCCAGATGAGCCAAAAATGACGAAAATCGAGACTTTGAGGAAAGCCCAAGAATACATCGCCAGTCTAAGCTTCCAACTATCCGGCGGCTCCCCAGACTCCTCTCAGTGCTGCGAGACGGGTTCCTGTGGCCTGTGCTCCGCGAGCCAATCTCTTCAGTCC…	QTGEQDLDMERENDMDQNSKNSTQKPVKREKRRYRCRKRSPATIERAKTVRRDKANARERRRMNSLNDALEHLRGILPALPDEPKMTKIETLRKAQEYIASLSFQLSGGSPDSSQCCETGSCGLCSASQSLQSTPFQSPCFPQPLQYPSSYSN	Z003_18414	Caenorhabditis_elegans	Y69A2AR.29	HLH	HLH
112	16G12	pTH9144	TGTCACGGACCTACGGCGCGCCATGTCATCTAAAAATGAGCAGACACC	TAGTGCACCACAATCCTGCAGGACTGAGAATTATCCAACTCTTCTATAT	ATGTCATCTAAAAATGAGCAGACACCAAAGGTTCCGGCTGAGTTGGATCCACTAAATGAGACAATTTTCCGAGAACAAATGTACGCAATCTATCAAGTATGTCAATATCCATCAAAAGAGCAATACGCAGAATGGGCTCAGACGTATCAAATTCAGCAGAGAAGAATTCGAAAATGGTTTGATAATCGGCGAACAAGAGATAGAGAACGGAGAAAGAGAAAAGGAGATGACAATGAAGATTCAAGTGAAATTTCAAAAAGAGGAAGAGTTACTTGTGGTCTAGATTACAAGAATCATGAAGAGGAATCTACGGATGATTTTCAAGATGATATAGAAGAGTTGGATAATTCTCAGT	MSSKNEQTPKVPAELDPLNETIFREQMYAIYQVCQYPSKEQYAEWAQTYQIQQRRIRKWFDNRRTRDRERRKRKGDDNEDSSEISKRGRVTCGLDYKNHEEESTDDFQDDIEELDNSQF	Z003_19236	Caenorhabditis_elegans	ZC376.4	Homeobox	Homeobox
113	16H01	pTH9145	TGTCACGGACCTACGGCGCGCCACAAGTTCACGTCTCAATCGGA	TAGTGCACCACAATCCTGCAGGGAATAATGGCGCCCATTTTACGA	ACAAGTTCACGTCTCAATCGGAAATCTGCTACGCCAACTTATCTTCGGCGTCGTGATTCTGAACGTTCGTGGACGCCAGCTTCCGATGACTATTTTCCAGAAGAACATCAGAAGTTTAAGAAACGTGGAGTTGTTCTGAAGCCTTCAGTCGACGAGGAAACCGATCGAAGACGAATGTTGAATAGAATAGCAGCAGTTCGGTATAGAGAGAAGAAACGAGCCGAGAAGAAGGGAAGAAAAATGGAGTTCCAAGAAGTAGCTGATCGTAATCGAATTCTTCTTCAAAAAGAACGTCAACTAAAGCGTGAGATCAACTCGATGAAAAAGGAGCTTCGTAAAATGGGCGCCATTATTC	TSSRLNRKSATPTYLRRRDSERSWTPASDDYFPEEHQKFKKRGVVLKPSVDEETDRRRMLNRIAAVRYREKKRAEKKGRKMEFQEVADRNRILLQKERQLKREINSMKKELRKMGAIIQ	Z003_19239	Caenorhabditis_elegans	ZC376.7	bZIP_1	bZIP_1
114	16H04	pTH9146	TGTCACGGACCTACGGCGCGCCAAGGAGCAGCTTCTCAAGGAG	TAGTGCACCACAATCCTGCAGGTTGCAAACATATCAAATTGTTGAGGG	AAGGAGCAGCTTCTCAAGGAGATTGCTGAAAACGAGCATATTCATTCGATGCAAATGAGAGCTCTTCAAAATCTTCCACAGGAAGCTATTCTCCCACTGCAATATCATGCTGATCCAAGACGCCGTCACCGAATGCAAAAACCGGAATCGTACAAGACTGTCATATGTCAGGCTTGGTTGGAGTCGAAGACATGTGCTTTCGCGGAGAACTGTCGTTTTGCTCACGGCGAAGAGGAGCTTCGTCCATCTCTGATCGAGGCACGTCAAAACAATAAGTACCGGACGAAGCTCTGCGATAAGTACACTACTACTGGGTTGTGCCCATATGGAAAACGCTGTCTTTTCATTCATCCGGACAATGGACCAAATGCATACATTCGAGCCGATAAATTGTTCGAG…	KEQLLKEIAENEHIHSMQMRALQNLPQEAILPLQYHADPRRRHRMQKPESYKTVICQAWLESKTCAFAENCRFAHGEEELRPSLIEARQNNKYRTKLCDKYTTTGLCPYGKRCLFIHPDNGPNAYIRADKLFEVSQRHALADLRDQMEHHIMNGGRSTAGPQQFDMFAR	Z003_19358	Caenorhabditis_elegans	ZC513.6	zf-CCCH	zf-CCCH
115	15F01	pTH9147	TGTCACGGACCTACGGCGCGCCATTCCGCATCGAGACCAGTC	TAGTGCACCACAATCCTGCAGGTTATTTCGGCAACTAGTTGATTGACG	ATTCCGCATCGAGACCAGTCATTCGACTGCGTCCAAATGCAACAGCCTCAAAACGAAACGGCCAATAATTTTATACCTAGCATTCAGCTCCTCTGGTCAACGGACCCTCCACAAATTCGGCCAGATGGTACATACCCACAAGCTGTTGAGCTCTTCCCGTGTTTCAAGGATAAATGGAACACTAAAGAGGAAATCCTCAACATAATCCTTGCCGCAAACGCTGATCCAAAATCGAATTGTGTCACTGTTCAGTCTTCTCCAAGACCATGCTCCAGCTCCCAATTCATCTACCCTCGTCTGGACAATGCTTGGTACAAAAACGATGGATATATCTGGAAGAAGCGGACAAACGGAAAACAAAATCGAGAGGATCATTTGAATTTGAAGATTAGTGGTCAT…	IPHRDQSFDCVQMQQPQNETANNFIPSIQLLWSTDPPQIRPDGTYPQAVELFPCFKDKWNTKEEILNIILAANADPKSNCVTVQSSPRPCSSSQFIYPRLDNAWYKNDGYIWKKRTNGKQNREDHLNLKISGHPHISAKYIHSAIVPTFHRRSYSVPDSDCHVLVHYLNVKTNNKIDDQAEEIARSMIENKVFISLSQLHDQLSPIFLQTLNVNQLVAEIN	Z003_13142	Caenorhabditis_elegans	T05C1.4	CG-1	CG-1
116	16G10	pTH9148	TGTCACGGACCTACGGCGCGCCTCGACGGAGCCACGAACTC	TAGTGCACCACAATCCTGCAGGGATTCCGGTACTCCTCCTGC	TCGACGGAGCCACGAACTCCTGAGGAGAGCCATTGTGCTCCAGAAAAGTCACCAGAAAGTACAGAAAATGCCAGCCCGCTAAGCTCATCAGCTGAGCCAGAAACTCCAGAGGAAACAAGTACAAGCATGGTTCAAATCCCAGAAAATTTCAAAAACAAGCGTCTATCTCAAGACCTCGTCGACAAGCTCCAGGAGCTGTTCCAGATCAACGAGATGCCCGGTCGAGAGATCAGTGAACAGTGGGCGCAGCAGCTGGGGATCTCACTAAAAACTCTAAACAACTGGATGCAAAAGAAGCGAAGTCAAAAGTTACACCCAGAACAGGCTAAGCTCAAGAGTCAACGCTGGCAAGAAACGCGACGACTGAGGAGAGCCGGGCTGAATCAGGAAAAAGTAGAA…	STEPRTPEESHCAPEKSPESTENASPLSSSAEPETPEETSTSMVQIPENFKNKRLSQDLVDKLQELFQINEMPGREISEQWAQQLGISLKTLNNWMQKKRSQKLHPEQAKLKSQRWQETRRLRRAGLNQEKVEKALPYLEAAFKRCQFATQQTMAELKLNTSLQKSQIRLWFSRRRKAPDATHVPAIESDSDDLVELRALFNATEEDDDSDIEILRDTRQEQEEYRNR	Z003_19145	Caenorhabditis_elegans	ZC204.2	Homeobox	Homeobox
117	13B05	pTH9149	TGTCACGGACCTACGGCGCGCCATGCCCTATCGTGCAGAGC	TAGTGCACCACAATCCTGCAGGCAGCAACTTGTAACATACGCTTTTG	ATGCCCTATCGTGCAGAGCTAAAACGTCCCGATTTGAAAGGCTCATTTCCCTGCTCGATTTGCCAAAAAGTATTCTGCCACAGTTCGTCTCTGAGTCGTCACCGGATGCAGGCTCACTTTAAAAGCTACACCTGTACCACTTGCAACAACGAAATTCCAAGCAACGATACACTACGCAGTCACATGTATCGAGTACACAACATTACCCGAATGTTTATGTGTCGGTGTTGCAATTGGGCTTTTCCCGACAAAACAAGTCTTCACATCCATATGCAGAGTATGCTGAAAAATGGGACACCGGGGGAAGCGGCTGTTTTAGCTAAGAGTTCAGATGTTGTAGATAGCACATCCGAGTCGGGCTCCCCGCGTCAGTCTCCACCCTTCTCGCCTGATTTGTTG…	MPYRAELKRPDLKGSFPCSICQKVFCHSSSLSRHRMQAHFKSYTCTTCNNEIPSNDTLRSHMYRVHNITRMFMCRCCNWAFPDKTSLHIHMQSMLKNGTPGEAAVLAKSSDVVDSTSESGSPRQSPPFSPDLLMQKRMLQVAA	Z003_1221	Caenorhabditis_elegans	C07A12.1	zf-C2H2	zf-C2H2
118	13F05	pTH9150	TGTCACGGACCTACGGCGCGCCCAGAAGATCAAAGAAGAAAGTGTGTCT	TAGTGCACCACAATCCTGCAGGGTGAGATTTGTGGGGATGTCATAG	CAGAAGATCAAAGAAGAAAGTGTGTCTCCAAAAATGTCCCCGACGCTCACTACTGCAGCCGTTCGACCATTTGTTCCTTACGATCAACCATGGTTCATGATCCCTGGACGTGGAAGGACTACTGGCCGAGCAGCCCGACCAAAGAAGGAATTCATCTGCAAATATTGTGATCGTCACTTCACCAAGTCTTACAACCTCCTGATCCATGAAAGGACACATACTGATGAGCGACCATACTCGTGTGATGTTTGTGGAAAAGCATTCCGTCGTCAGGATCATCTTAGAGACCACAAGTATATCCACCAAAAGGACAGGCCATTCAAATGCGAAATCTGTGGGAAAGGATTCTGCCAATCAAGAACTCTCCTCGTCCACCGTGCAACACATGATCCAAACCGA…	QKIKEESVSPKMSPTLTTAAVRPFVPYDQPWFMIPGRGRTTGRAARPKKEFICKYCDRHFTKSYNLLIHERTHTDERPYSCDVCGKAFRRQDHLRDHKYIHQKDRPFKCEICGKGFCQSRTLLVHRATHDPNRHSIGAPVVPIKSETPLPELDPRVTLILQNLTDSFNSTSMTSPQISP	Z003_3097	Caenorhabditis_elegans	C34H3.2	zf-C2H2	zf-C2H2
119	13G05	pTH9151	TGTCACGGACCTACGGCGCGCCGACGGCGTTCCAGTTCGGA	TAGTGCACCACAATCCTGCAGGTTGGATTCATTGGATGTCCCAG	GACGGCGTTCCAGTTCGGAAGGCAAACAAAAGAAATCATTCAACTTCAAGTGCTGCAGATAGCTCATCTGATGATGCGAAGGATGATGACGACGATGATGATTCTACATCTCGAAAATCAATGTCTGGTCACCGAAAGAGCAGTCACGCAAAGCCACCGTACTCCTACATTGCACTCATCGCGATGTCAATTCTCAATTCACCGGAGAAGAAACTGACACTTTCGGAAATTTGCGAGTTCATAATCAATAAGTTCGAGTATTACAAGGAGAAGTTCCCCGCCTGGCAGAACTCGATTCGTCACAACCTAAGCCTCAACGACTGTTTTGTGAAGGTGGCTCGGGGGCCTGGGAATCCGGGAAAAGGAAACTATTGGGCGCTGGATCCGAACTGTGAGGAT…	DGVPVRKANKRNHSTSSAADSSSDDAKDDDDDDDSTSRKSMSGHRKSSHAKPPYSYIALIAMSILNSPEKKLTLSEICEFIINKFEYYKEKFPAWQNSIRHNLSLNDCFVKVARGPGNPGKGNYWALDPNCEDMFDNGSFLRRRKRYKKNSDTYHEMMSHHPMPFPPFLPQGMPFPPRMMHPMANIPMLGHPMNPR	Z003_3842	Caenorhabditis_elegans	C47G2.2	Fork_head	Fork_head
120	13G07	pTH9152	TGTCACGGACCTACGGCGCGCCATGAGTGGAAATCGGAAGCGA	TAGTGCACCACAATCCTGCAGGCGGCGGAAGAAGATGGTGG	ATGAGTGGAAATCGGAAGCGAAACACATCAGAGCCTCGTGAGGACGATGAAGATGACTATTCCACTAAACGAAAACGGAATAACGAAGCTGTGAACAGAACCCGACAAAAAAAACGCCAGGAAGAAAATGACACTGCAGAAAAAGTAGACGAATTAAAAAAGGAGAACGAAACACTAGAAAGAAAGGTCGAGCAGCTACAGAAAGAGTTATCATTTCTTAAAGAAATGTTTATGGCATATGCGAAAAACGACGGAAATGATGGACCACCACCACCGCCACCACCATCTTCTTCCGCCG	MSGNRKRNTSEPREDDEDDYSTKRKRNNEAVNRTRQKKRQEENDTAEKVDELKKENETLERKVEQLQKELSFLKEMFMAYAKNDGNDGPPPPPPPSSSAV	Z003_3880	Caenorhabditis_elegans	C48E7.11	bZIP_1	bZIP_1
121	14A10	pTH9153	TGTCACGGACCTACGGCGCGCCATGACTAAGAAATCTACAATTCAACCG	TAGTGCACCACAATCCTGCAGGTGCAAAATTTTGGATTCGAATCACTC	ATGACTAAGAAATCTACAATTCAACCGTGTCTGGTATGTGGTCAGAGCTCAAATTCTATTCTTTTTGGTGCACCGTCTTGCAGGGCTTGTGGTGAATTTTTTCGGCGAAAAGTTATTTCAAATTTTAAAATCAAAAATAATTGTTTGGGAGAGTGTAGTTTTGCCAAAAAATCGATGAAACCTTGTCAAAGCTGCAGGTTTCAAAAATGTTTGGAAGCAGGGATGTTGGAGAAAATGGTATTCTCTAGGAAGGCGATTTATTCCATTTCAAACTTTGAAAAAAGTATTTTGGAAGAACTAGAAGAAGCCTATAGTAAACTGGAACATGGGAGGAACGAAACTTTCAATCCAAAGAGTGATTCGAATCCAAAATTTTGCA	MTKKSTIQPCLVCGQSSNSILFGAPSCRACGEFFRRKVISNFKIKNNCLGECSFAKKSMKPCQSCRFQKCLEAGMLEKMVFSRKAIYSISNFEKSILEELEEAYSKLEHGRNETFNPKSDSNPKFCS	Z003_5734	Caenorhabditis_elegans	F14H3.11	zf-C4	zf-C4
122	14C11	pTH9154	TGTCACGGACCTACGGCGCGCCCGAGAAAAAAGTGAAGAAGAAGTATTG	TAGTGCACCACAATCCTGCAGGCATAAACTTCTTTCATGAGTTCATTTG	CGAGAAAAAAGTGAAGAAGAAGTATTGACTGCTTCGGCTGATTATACCGTTGTTCCATGGACTGCAATAGCCAACTTCGACTTCAAAGGCTCTAGAACGGAATGGGCGGTGAAATCGAAATGGTACAATGAATTGAATCCAAAGTGGAACAAAGAACATTGGTCAAATGAAGAAGTAGAAAAGCTGAAATACCTTCGAGAAAGTCCAAAGTTTGTCTCCTGGCCGATGCTGGCTCTGAATCTCGGTACAAATCGAACATCTTATCAATGTATGGAAAAGTACAAAACCGAAGTGTCTCAACATTCAAAAGAATGGTCTCAAGACGAAGACACCAAGTTAATTGCGCTCACAAAAATTACATCGATCAACGGACATATTCAATGGGATAAAGTTGCACAA…	REKSEEEVLTASADYTVVPWTAIANFDFKGSRTEWAVKSKWYNELNPKWNKEHWSNEEVEKLKYLRESPKFVSWPMLALNLGTNRTSYQCMEKYKTEVSQHSKEWSQDEDTKLIALTKITSINGHIQWDKVAQCMPGRTRQQVRTRFSHTLDASVKHGRWTDQEDVLLVCAVSRYGAKDWAKVAQAVQNRNDSQCRERWTNVLNRSAHVNERFTLVEDEQLLYAVKVFGKGNWAKCQMLLPKKTSRQLRRRYLQLIAAKLRLAAGFCNAVDAMKSGRRAPEEDELEQEDIVEAEQIPNELMKEVYE	Z003_7143	Caenorhabditis_elegans	F32H2.1	Myb_DNA-binding	Myb_DNA-binding
123	14D02	pTH9155	TGTCACGGACCTACGGCGCGCCAATCCAGCAGTGGAGTTTGTAAAC	TAGTGCACCACAATCCTGCAGGGGGAGATCTTGGAAAGTTGTTCG	AATCCAGCAGTGGAGTTTGTAAACGGAGGCTACGGAGTCAAAAACCCCCTGGCTCCGTTGATCAGCTCCTTCGAAACCACCTCAATTCCGTGTTCAACAGTATCTCCTTCATCCCTCATCTCCTCCAGCAAAGACGAGTTCCAAGATTCATTAACCTGTCACATTTGCGGCAAAAAGTTCGGTTTACAACGTCTTCTGAACCGTCACATAAAGTGTCATAGTGACCTGAAACGGTATCTATGCACATTTTGTGGAAAGGGTTTCAACGATACATTCGACTTAAAAAGGCATACCAGAACACATACAGGCGTCCGTCCCTACAAATGTGAGCAATGCGAGAAGTCGTTCACTCAACGATGCTCCTTGGAATCCCATTTACGGAAAGTTCACGGTGTCACT…	NPAVEFVNGGYGVKNPLAPLISSFETTSIPCSTVSPSSLISSSKDEFQDSLTCHICGKKFGLQRLLNRHIKCHSDLKRYLCTFCGKGFNDTFDLKRHTRTHTGVRPYKCEQCEKSFTQRCSLESHLRKVHGVTHQYAYKERRSKVFVCEDCGYTDEKFEVYLSHIKVVHPFSAAYLRFTQLQKKNSSMKPEQLSKISL	Z003_7233	Caenorhabditis_elegans	F34D10.5	zf-C2H2	zf-C2H2
124	14E06	pTH9156	TGTCACGGACCTACGGCGCGCCATGGATCAACCAATCTCTGTTACTC	TAGTGCACCACAATCCTGCAGGGAGACTGGAGCAGGTTTGGT	ATGGATCAACCAATCTCTGTTACTCTCTCTTCAACCACTGATCCTCTCTGGAGGTCTTGCCACGAATATGATAATGAAATGGTGATCACTGTCAACGGTCGCCGTATATTCCCAACTCTCGAGTACACAGTGACAGGACTTGATACTTTTAAGCTATACTCAATGTGCATGCACTTGGATTTGGTGGATGATAAGAAGCTTAGATTCACTGGAGGACAATGGGCTGAATCAGTGTCAACTGAGAAAAAGGACCCACCTCGCAAAGTTTGGCATCACAATGGATCACAAACTGGAAAGGATTGGATGCTCAGAAATGTCAGTTTCGATCAGATTAGAATCACAAATCGGAAGTCAAAGGAAGATGGCAACGCTTCGTATGTTCACTTGCTCACCCAGCAC…	MDQPISVTLSSTTDPLWRSCHEYDNEMVITVNGRRIFPTLEYTVTGLDTFKLYSMCMHLDLVDDKKLRFTGGQWAESVSTEKKDPPRKVWHHNGSQTGKDWMLRNVSFDQIRITNRKSKEDGNASYVHLLTQHRYIPVLTIYEGDQLVHTARIPHSQFISVTAYHKGELNTLKTNNNPYSTGSRKDRRRERQSPVYSEGTSSEKSISPPPAKKIKDMAPALPDYSVISKPNLLQSL	Z003_7881	Caenorhabditis_elegans	F40H6.4	T-box	T-box
125	14E09	pTH9157	TGTCACGGACCTACGGCGCGCCATGAAACAAGAACGATCAAGTGGT	TAGTGCACCACAATCCTGCAGGCAATCGACAGAGGAGAATTGTCAT	ATGAAACAAGAACGATCAAGTGGTGGTTACAGTGGCATTCCACCCACATCCAAATGCCTTGTTTGTGAGCATCCAGATGGTGGCTCCGCGCATTTTGGGAGTACATCATGTCTGGCGTGTGCCGCGTTTTTCCGAAGGACCGTATCGCTGAATATTCAGTTTCAGTGCAAAAAGGACAAGAACTGCGTGATATTTCATGAACTCCGAATGATTTGCCGAGCTTGTCGATTCGATAAATGTGTGAAAGCTGGTATGCGGCGAGAATGTGTACAGAAAAGAAGGTCGAATAAGAAAATTCCGAAGAAACATATGAATATGTTGAGAGAAGATCAAATTAAGATGGAATATGATGAGTGCAAGTTTGAATGCTCTGGAGACCAAACTGATGACAATTCTCCT…	MKQERSSGGYSGIPPTSKCLVCEHPDGGSAHFGSTSCLACAAFFRRTVSLNIQFQCKKDKNCVIFHELRMICRACRFDKCVKAGMRRECVQKRRSNKKIPKKHMNMLREDQIKMEYDECKFECSGDQTDDNSPLSIE	Z003_8118	Caenorhabditis_elegans	F43C1.4	zf-C4	zf-C4
126	14E10	pTH9158	TGTCACGGACCTACGGCGCGCCCAAAAAGTTCCAAAACTAGAATTGGAA	TAGTGCACCACAATCCTGCAGGTGCACGTTTCCAAATGACGATT	CAAAAAGTTCCAAAACTAGAATTGGAAAACGATGAAGATGTATCTTCATCTCCGTCTCCAACATGTTCTACCACTGGATATACATTGGATTCACTTCAAAATTTGGATAGAAGAAGCTTGAATAAAAAAGGACCATCCTCTCATAACAGATGTGTATGTGACAAATGTGGGAAAAGCTACGCAACAACTTCCAATCTCAGTCGACACAAGCAGACGCACAGAGCTTTGGATAGTCCACATGCCAAACAATGCCCTCATTGTGATCGAGTCTACGTCAGTATGCCTGCACTAAGCATGCACATTTTAACACACAACGCTTCTCATGAATGTAATGTTTGCGGGAAACGATTTTCGAGACTTTGGCTGCTCCAGGGACATCTTCGTTCTCACACAGGTCTT…	QKVPKLELENDEDVSSSPSPTCSTTGYTLDSLQNLDRRSLNKKGPSSHNRCVCDKCGKSYATTSNLSRHKQTHRALDSPHAKQCPHCDRVYVSMPALSMHILTHNASHECNVCGKRFSRLWLLQGHLRSHTGLRPFSCAHCGKSFADRSNLRAHMLTHTGDKRFECDKCGRRFALRAYLNRHLETCK	Z003_8158	Caenorhabditis_elegans	F43G9.11	zf-C2H2	zf-C2H2
127	14F04	pTH9159	TGTCACGGACCTACGGCGCGCCCGCCAAATCAAGCAAATGTATTACA	TAGTGCACCACAATCCTGCAGGGATTGTTTATATTCAAATTGTTATCGA	CGCCAAATCAAGCAAATGTATTACAATGAGCCGGTTCAAGAAATTCATATGCAACCAAAAAGTGGTCCGCTGGTTCGACAAGTGTCCGAAGAGCCAAGATACGTTCCAATTGCTCCGACAGTAGATATCAAAGCAGAACCACAAGTTTTTACTTCCGAGCAAAATCGAAAAATTCGGAACCGAATGTACGCCCAAGCCTCTCGCATGCGCAAGAAGGAAGCCGATGAACATATGAAAATGAACCTTCAGGAACTGCTTCAAGAAAACGAGATTCTAAGAACTGAGAATGCCGCTTTGAAGCAACGCCTTGCGTTTTTTGAACACGAAGAGCCAGTTGTCGAAGTTCCACAACCCTTTGGAAGAAATCAGAAGAAAAAAAGAATTATTGCTGCTGGTTCA…	RQIKQMYYNEPVQEIHMQPKSGPLVRQVSEEPRYVPIAPTVDIKAEPQVFTSEQNRKIRNRMYAQASRMRKKEADEHMKMNLQELLQENEILRTENAALKQRLAFFEHEEPVVEVPQPFGRNQKKKRIIAAGSVLMMFGLFAVISPFNVDNNLNINNQ	Z003_8335	Caenorhabditis_elegans	F45E6.2	bZIP_1	bZIP_1
128	14F08	pTH9160	TGTCACGGACCTACGGCGCGCCATGTCTGCCAACCCTTCGC	TAGTGCACCACAATCCTGCAGGTTTGTCTTAGAGTTGGATTTTCAGATG	ATGTCTGCCAACCCTTCGCCTGACTCGTGTGGCTCGGACTATTTGCCGACGGATATGGAGCCGGAAACCAGTGCCGTGAGTGTGTCGGAAAAATGTGCGGTTTGTGGAAAACCGGCGTTCTGCTACAATTATGGGGTTCTCTCGTGTAATGCGTGCAAAATGTTCTTCCGCCGGGTGGAGGTAGACCACATCACGTATAACTGCAAATATTGGAACACGTGCTACGATGGACAAGAGTATGTTGACGCCAATAATGTCTCCACGCGATGCCGAGCATGCCGATATCGGCGTTGTATTGACCTCGGCATGAGATATATAGCTCCAGGAAAACCAGACTTGGAACTCGTGAACCAAGTGGATGGAAAACTGAATACACTGCTTCAAGAACTGGTTCTCATG…	MSANPSPDSCGSDYLPTDMEPETSAVSVSEKCAVCGKPAFCYNYGVLSCNACKMFFRRVEVDHITYNCKYWNTCYDGQEYVDANNVSTRCRACRYRRCIDLGMRYIAPGKPDLELVNQVDGKLNTLLQELVLMDARRSHKILNFYTSENPTLRQM	Z003_8543	Caenorhabditis_elegans	F47C10.3	zf-C4	zf-C4
129	14H04	pTH9161	TGTCACGGACCTACGGCGCGCCCATTACAATGATCTACAAGATATTTGG	TAGTGCACCACAATCCTGCAGGGACTGTCACGTAATGTACCATAGATC	CATTACAATGATCTACAAGATATTTGGCATCATGCAAGGTACAAGGAAAGTCAGCTGAAACGTGGCAAAGAACTGAATCCAGTGGAAAAATATCGGCTGAGACGAAAGTTTCCGGCTCCGAAAACAATTTGGGATGGTGAGGAGATTGTGTACAGTTTCAAGGATTCGAGTAGGAAATTTTTGAAACAATTTTTCCGCAACGTCTCTGAATATCCGACCCAGGAGCAGAAAAGAGAGATTTCAAGAGCAACAGGACTCAAAATTGTACAGATTTCAAATTGGTTCAAAAACCGTCGCCAACGGGACAAATCGAACAATTCAGCCAAATGCTCCCCACCTTCCAGCTCGAGCAGCACTAATGGTGGCAGTGACTTTCTTCCAATAATAACTCCGCAAAGC…	HYNDLQDIWHHARYKESQLKRGKELNPVEKYRLRRKFPAPKTIWDGEEIVYSFKDSSRKFLKQFFRNVSEYPTQEQKREISRATGLKIVQISNWFKNRRQRDKSNNSAKCSPPSSSSSTNGGSDFLPIITPQSFNLAAAPFNMNMIYGTLRDSQ	Z003_9435	Caenorhabditis_elegans	F56A12.1	Homeobox	Homeobox
130	15B06	pTH9162	TGTCACGGACCTACGGCGCGCCATGGCAACTTCCAGAAACTATGG	TAGTGCACCACAATCCTGCAGGCATTGTTAAGAACATCAACAAGGCTT	ATGGCAACTTCCAGAAACTATGGCGTTCTGTCGTGCTTTGCCTGCAAGATGTTCTTCTATCGATCTTCTAAAAACAACCTTATTTATAAATGCAGGAATATAAATCAGTGCTTTCAAAACTACAATAGCCCTATCAAATGCAGAGCTTGCCGGTTTCGAAAGTGCCAGAAAGTTGGAATGAAACTTTTGACTCTGAAAACGAGTCTTCCCGACCTTGACAATGACTTGAACATCTTGTTCGCTGATTTGGAAATAAGGGACAGCTCAAATCATTCGATTTTTCTGAATTTTTACTCGATGGAAGATCCAAGCCTTGTTGATGTTCTTAACAATG	MATSRNYGVLSCFACKMFFYRSSKNNLIYKCRNINQCFQNYNSPIKCRACRFRKCQKVGMKLLTLKTSLPDLDNDLNILFADLEIRDSSNHSIFLNFYSMEDPSLVDVLNNA	Z003_10801	Caenorhabditis_elegans	K06B4.5	zf-C4	zf-C4
131	15A02	pTH9163	TGTCACGGACCTACGGCGCGCCATGACTGATACCCAATCCCCG	TAGTGCACCACAATCCTGCAGGCGGCGTCGTCGCTGTCGTC	ATGACTGATACCCAATCCCCGTTTTCATTTGCCGCCGCACTATTGCAATGCGGTTCGCCCGGTCAAACATTTTCAATGGAATCCCTGTTAAAACCGGAATTAGGAGAGTATTCTCCTTCCGGAGAGAATGGAATTGATGGCGAAGAATCAACGATCTGTTCTGTATGTTGTGATGAGGCATCCGGAAGACATTACGGTGTTGTCGCCTGCTTCGGATGCAAAGGATTTTTCAGACGTACTGTACGAGCTGGAAAAAACTATGTGTGTCGTTACAGTAAAAAGTGCCGAATTGATAAAGCTGGACGAAATGTGTGTAGATCGTGCAGATTCCAAAAATGCTTAGAAGTCGGTATGGAGCCTGATGCAATCCGTCCTGATCGCGATAAGACAGGACGCCAA…	MTDTQSPFSFAAALLQCGSPGQTFSMESLLKPELGEYSPSGENGIDGEESTICSVCCDEASGRHYGVVACFGCKGFFRRTVRAGKNYVCRYSKKCRIDKAGRNVCRSCRFQKCLEVGMEPDAIRPDRDKTGRQKNPRRNTEGSIKKVSVGSILGDLPCLNKFKDDSDDAA	Z003_10058	Caenorhabditis_elegans	H01A20.1	zf-C4	zf-C4
132	15C04	pTH9164	TGTCACGGACCTACGGCGCGCCCAACCTCCACCTCAATTCCATC	TAGTGCACCACAATCCTGCAGGTTTCAAGACGCTCGAGGAAGT	CAACCTCCACCTCAATTCCATCCAATTTTCCCTGCAAACCCATTGTTCCACATGGCGCCTCCACATCATCCAGTTGCTGGAGGTGGAATTTTTCCTCCAAACTTCAATGCATTTAACGCATTCAACGCTCTCCGAAGAAATCTTCAAGACGTAGATACCTCGTCGGAAATGAAAAAGAAGCGAACAAAGGTGGAAATCAAGAAAGAAGACGCAATGAGTAGCCGTGCATCACCATTGAGTGCATCTGCCAGCCCACCACTCTCCAGATTCTTTCCAGCACCAACTATGGTTGGACACTACGGTGGAATGAACTTTGGAGATCGAGAGGACTCACCAACAAATTCCGATGAGCTCAGTGAATGTGGATATGAAGGTGGTGGCTCAAGTTCAATGTTAACA…	QPPPQFHPIFPANPLFHMAPPHHPVAGGGIFPPNFNAFNAFNALRRNLQDVDTSSEMKKKRTKVEIKKEDAMSSRASPLSASASPPLSRFFPAPTMVGHYGGMNFGDREDSPTNSDELSECGYEGGGSSSMLTPMHLRKAKLMFFYTRYPNSNLLKSYFPDIRFNKNNTAQLVKWFSNFREFYYNQMEKFARQALAEGITDRNDIFVSKDSELFKVLNTHYNRNNHIKAPDRLVFVVQETLREFHDAIKQGKDIEPSWKKTIYKVINRLEDQIPDFFKEPNFLERLET	Z003_11431	Caenorhabditis_elegans	K12H4.1	Prox1	Prox1
133	15F10	pTH9165	TGTCACGGACCTACGGCGCGCCGAAGGTAATGAGGATCCTGATATGTC	TAGTGCACCACAATCCTGCAGGTATTGAGAATGGAATCTTTTGTTGCC	GAAGGTAATGAGGATCCTGATATGTCTGTAGACGTTGATGAAGACCTAGAAGATCTCACTCTCAGTCAAGCACTTGAACTTTTTGATAGGACAAACTTTCAGGAACCACGTACCAAGAAAGCAAAAGCTGATGAGCCATTTGGAGAGCTTTATCAGTGTCAGTTATGTAAGAAGAGCATCTCAAGGCATGGACAATACGCCAATCTTTTGAATCATTTGTCAAGGCATGCAAGGTTACATGCATCGAAGAAACAATATTGTTGTCCAAAATGTGGAGCCAGCTTCACAAGGAGGTACCTAGCATCTACTCACATTAAGGAAGTTCATGGAGAGCCGAAGCTTCAGCCTCATGATTTTGCAGCCGAACTCCGCGAGGAATACCGTCGGCTTCTTGAAATG…	EGNEDPDMSVDVDEDLEDLTLSQALELFDRTNFQEPRTKKAKADEPFGELYQCQLCKKSISRHGQYANLLNHLSRHARLHASKKQYCCPKCGASFTRRYLASTHIKEVHGEPKLQPHDFAAELREEYRRLLEMCFPGADNRRKQQQAVTQATKDSILNI	Z003_13586	Caenorhabditis_elegans	T09F3.1	zf-C2H2	zf-C2H2
134	15H08	pTH9166	TGTCACGGACCTACGGCGCGCCCGTTCTACGACAAGATCACAAAGC	TAGTGCACCACAATCCTGCAGGAGGGCCCGGGTCCATGCCC	CGTTCTACGACAAGATCACAAAGCCGAGTCAGTCTTGACGAGGACCGTCAGAATTCGGCTCCGGTCCGTCGTTCAGTTGAAGCACACATTCTTGTGCAGAATGCGACTCCAACTGTGGTTGGCGGCAACGGCTCTTCGAGTTCACCACCCAAGAAGACAAAGAGCCCATTCACCGAGCATGAAATTGCAGTGATGATGGCTCTTTTTGAAATCAACAAGTCTCCAAATCATGAAGAAGTTCAAAAATTGGCTGTTCAACTGAACCTGGGCTACAGAAGCGTGGCTAATTTTTTCATGAACAAACGGGCCAAGGAGCGGAAAAAATTGCAAGGGCATGGACCCGGGCCCT	RSTTRSQSRVSLDEDRQNSAPVRRSVEAHILVQNATPTVVGGNGSSSSPPKKTKSPFTEHEIAVMMALFEINKSPNHEEVQKLAVQLNLGYRSVANFFMNKRAKERKKLQGHGPGPS	Z003_14725	Caenorhabditis_elegans	T26C11.5	Homeobox	Homeobox
135	16C11	pTH9167	TGTCACGGACCTACGGCGCGCCATGTCCGACTCCCCGCAGA	TAGTGCACCACAATCCTGCAGGTCATACGTTTTTTTTCAATATCAAAAA	ATGTCCGACTCCCCGCAGAGCTGCAAAAAGCCGCGAACTCGGAAAGAAACTATTCAAAAGCGAGAAACACGAAGTAAGCATGAAAAACGACGAAGGGAAGAGATGAATGAAGTGATTTGTGAAATGTCGACACTTTTGCCCGAAGATATTCGGGCTCATAAGCTGCGAAGAGTGGATCAGAAGCCTCGTCAGCTGGACAAATGCTTTATCATTGGGAGTACTGTTGATATTATTCGGAATAGTGATTATAAACCACCGCTGCTCTCCGACCCGCTCGTCCAGGATATTTTCAGCCTGACCAACTGTTTTATGGTTTTTCTGAACAATTTTATTGTCGTGGATATTAAGGGAGACCATCAGGCAGTTTTTGATATTGAAAAAAAACGTATGA	MSDSPQSCKKPRTRKETIQKRETRSKHEKRRREEMNEVICEMSTLLPEDIRAHKLRRVDQKPRQLDKCFIIGSTVDIIRNSDYKPPLLSDPLVQDIFSLTNCFMVFLNNFIVVDIKGDHQAVFDIEKKRMI	Z003_16636	Caenorhabditis_elegans	Y39A3CR.6	HLH	HLH
136	16D02	pTH9168	TGTCACGGACCTACGGCGCGCCATGGCCCCGCCGTGTCCAG	TAGTGCACCACAATCCTGCAGGTTTCCAGGTGGGTGTACTGG	ATGGCCCCGCCGTGTCCAGTTTGTCAGGCTCCGTCAAATGGATTTCATTTTGGAGTTGAGGTTTGCAGTGCTTGCTCCTCGTTCTTCCGCCGGGCAGTGTTCAAAAATCGAAAATTCCGATGTTACGGCGAACCTGTGAACAGCTGTGAAGTAATTTCAACTGGAAACGCGCTTTGCAAAGGCTGTCGGCTCGCGAAATGCCTGGCAGTTGGGATGAAAAAGGAGACTGTTCAGCAGGGAAGAGAGAGCTATGGAAAACGAGAATTGGCGCTGGTTTCTCTGCAGAGATCTTCTTTAAATATTCGTCTTGAGTTTCCAGTTCCTTACTTTATGATGGAATCCGTTAAAAACCAGTACACCCACCTGGAAA	MAPPCPVCQAPSNGFHFGVEVCSACSSFFRRAVFKNRKFRCYGEPVNSCEVISTGNALCKGCRLAKCLAVGMKKETVQQGRESYGKRELALVSLQRSSLNIRLEFPVPYFMMESVKNQYTHLES	Z003_16849	Caenorhabditis_elegans	Y41D4B.7	zf-C4	zf-C4
137	16A04	pTH9169	TGTCACGGACCTACGGCGCGCCATCCTTCATCAGGCCAACTATGA	TAGTGCACCACAATCCTGCAGGGTGGAGTCAACGTGTTCACC	ATCCTTCATCAGGCCAACTATGATGTCGGGCAGGCTGTCAAGTACCTGGTCCCAGTGGCCTCTCGAGACACGTACCCGTGCCAGGTCGATGATTCAAGCGGCCTGCAGACTAAGACCCTTGGCGGACCGATTTTGTGTCGGGATCAGCTGGAAGAGTGGTCGACGCCCGAGATGAATCTGTTCGAGGATGCGCTGGATAAGGTGGGCAAGGATTTCAATGAGATCCGCGCCGAGTACCTTCCGTGGAAGTCGATTCGGGACATTGTCGAGTACTATTACCTTATGAAGGCCTCCAATCGATACACAGATCGCAAGAAGAACAAGCCATCGGCGGGTGGTGGAAGCTCGACGACGACGGACGAGAAGTTCACCAACATCTACATTCCGCCGTTCAACAAG…	ILHQANYDVGQAVKYLVPVASRDTYPCQVDDSSGLQTKTLGGPILCRDQLEEWSTPEMNLFEDALDKVGKDFNEIRAEYLPWKSIRDIVEYYYLMKASNRYTDRKKNKPSAGGGSSTTTDEKFTNIYIPPFNKPIAASILPYNTSQTTLMNNDNPCENCGTLDALNWYQWGGVGDKKVLCSTCWIQWKKFAGLNQKHELERFDKTRPPPVEPVAPTPAASNGTPASQKAAATAAVNTLTPQ	Z003_14836	Caenorhabditis_elegans	T27C4.4	Myb_DNA-binding,GATA	GATA
138	16D07	pTH9170	TGTCACGGACCTACGGCGCGCCATGATGGCTAAAAGCGTATTTTGTG	TAGTGCACCACAATCCTGCAGGCCATTTCCTCGAAATATGTCAGTTTAG	ATGATGGCTAAAAGCGTATTTTGTGGTGTTTGTGAGCATTCCGCAGATGTTTTCCACTTTGGTGCAATTTGTTGTGAAGCGTGTGCTGCATTTTTCCGGCGACTAGTTTCTCGAAGCAAAACGCCAACGGCAATATGTTCTGGAAATTGCGATTTAAGAAATAAAATAATCAGAAAGCTTTGCTCAAGTTGCCGGTACCAAAAATGTCTTCAAATTGGGATGAAGGAGTCATTAGTGAAATCTAAGAAACAGAAAACTTCGAGCTCCGAGAAAACTATTCTGGAAGAGTTGAACGAAGCGTACCAAAATCTACTCGACTTGAGGAAAGAAACATTTCGAAACCAGGAAGCTAAACTGACATATTTCGAGGAAATGG	MMAKSVFCGVCEHSADVFHFGAICCEACAAFFRRLVSRSKTPTAICSGNCDLRNKIIRKLCSSCRYQKCLQIGMKESLVKSKKQKTSSSEKTILEELNEAYQNLLDLRKETFRNQEAKLTYFEEMD	Z003_17150	Caenorhabditis_elegans	Y46H3D.7	zf-C4	zf-C4
139	16D08	pTH9171	TGTCACGGACCTACGGCGCGCCATGCAAGTCTCCATCGTAAATGAG	TAGTGCACCACAATCCTGCAGGGCTGCTGAATCTGATATTGAATTTGT	ATGCAAGTCTCCATCGTAAATGAGCACAAATATCGAGAGCTCGAGCCGCTTAACGAGATGCTCGTAAAACGGGGCGGAGTCAAGATGATCCCGGAGCCAAAGTTTGTTATCAGTGGATTGGTGGATAACGAGGAATATGTGATAAAGTTGAGGATTGATTTGGCCGATGAGTTTAGATACTCATACCAAAACCAGCAATGGACGCCATTTGCTCCCTCAACCAAAAACTCGAAGCTATCGGCAATCACTGAAACCGAGCATAGAAAGGAAACCGGTGCCACGTGGAATATGCGTATTGTTCAGTTTGACAAGTTGCTCATCACACGTGAATTCAATGATATTCAGCGAAATGTGATCCACGTGGAGCCGAATCACAAGTACATTCCCGTCCTGACCATC…	MQVSIVNEHKYRELEPLNEMLVKRGGVKMIPEPKFVISGLVDNEEYVIKLRIDLADEFRYSYQNQQWTPFAPSTKNSKLSAITETEHRKETGATWNMRIVQFDKLLITREFNDIQRNVIHVEPNHKYIPVLTIQNVTTGKSTEFQFQQMEFIAVKSYQSARIRHTKRAPRKMNLAPGSSQKPQLIVPDILHSPTYGFTAAPPPFPFEYWLLYPQIQYQIQQL	Z003_17156	Caenorhabditis_elegans	Y47D3A.10	T-box	T-box
140	16D10	pTH9172	TGTCACGGACCTACGGCGCGCCAATGGGCCATCGAGGAGTAAG	TAGTGCACCACAATCCTGCAGGTCTCATTTCTAGGTGGAGAAGGAG	AATGGGCCATCGAGGAGTAAGGAGAAGGCGGCGAAGATTGTGATTCAGGAGACAGCGGAAGGGGATGAAGATGAGGATGATGAGGATAGTGATTCCGGGGAGACTATGTCTCAGGGAACTACTATTATTGTTCGAAGACCAAAAACCGAGCGTCGTACGGCACACAATCTCATCGAAAAGAAGTATAGATGCTCAATAAATGATCGAATTCAACAGCTGAAAGTACTTTTGTGTGGGGATGAAGCTAAGCTTTCAAAATCGGCAACACTACGACGGGCTATTGAACATATCGAGGAGGTTGAACACGAGAATCAGGTGTTGAAGCATCATGTTGAACAAATGAGAAAGACACTGCAGAATAATCGATTACCGTACCCGGAACCAATTCAATACACTGAA…	NGPSRSKEKAAKIVIQETAEGDEDEDDEDSDSGETMSQGTTIIVRRPKTERRTAHNLIEKKYRCSINDRIQQLKVLLCGDEAKLSKSATLRRAIEHIEEVEHENQVLKHHVEQMRKTLQNNRLPYPEPIQYTEYSARSPVESSPSPPRNER	Z003_17189	Caenorhabditis_elegans	Y47D3B.7	HLH	HLH
141	16E01	pTH9173	TGTCACGGACCTACGGCGCGCCATGGATCCCTCGTCAATAGACTT	TAGTGCACCACAATCCTGCAGGAATTATAGGGCCGCTCAATTGG	ATGGATCCCTCGTCAATAGACTTGGGCTCAATACCCGGTGGCTCGGAGCAACAACAACACGAGGACGGAGCAGCAGCAGCAGCTGGAAGTCCCAAAGAAGTATTTCGAAGTCAGCAATCACTTGGGCTCATTACACAACGATTCATGAGCCTACGGCAAAGGAATGAGGTGCTCAATTTGAATGAAGTGGCCAAAGAGTTGAATATCTCGAAACGACGCGTCTATGACGTCATCAATGTGCTCGAGGGGCTCGGTTATGTGGAGAAGGTGGAGAAGAATAATATTCGATGGATTGGAGACAACAACAATTCCGAAGAGCAAAACGCGCTCGAGGCCCGAGTCGAGATGCTCCGCCAACAGGAAAAGCTGCTCGAACTGATGATACGAGATGCTCAAGCG…	MDPSSIDLGSIPGGSEQQQHEDGAAAAAGSPKEVFRSQQSLGLITQRFMSLRQRNEVLNLNEVAKELNISKRRVYDVINVLEGLGYVEKVEKNNIRWIGDNNNSEEQNALEARVEMLRQQEKLLELMIRDAQAIIELHFEDPIERPYNY	Z003_17304	Caenorhabditis_elegans	Y48C3A.17	E2F_TDP	E2F_TDP
142	16E06	pTH9174	TGTCACGGACCTACGGCGCGCCATGTCTGCTGGACGAGGCG	TAGTGCACCACAATCCTGCAGGCGACACTGTCGAACGTGGA	ATGTCTGCTGGACGAGGCGAGAAGCCGCCGTGCAGTATTTGTGGAGAAGTTGGTAATGGTGTGCATTTTGGAGCAGAAGCCTGTCGAGCCTGCGCAGCATTTTTCCGCCGTTCAGTTGCCCTCAACAAATTGTACAGATGCCGTGGAGATGGAAATTGTGATATTCTTTCAACTATCAGATGCATGTGCCGAGCTTGTCGATTTGCAAAATGTATGGCAGTTGGGATGAAGCGAGAAGCCGTTCAAAAATACCGTGACGCTTACGGAAAACGTGGCTCTGACGTCGAATCGCCGGGCAGCTCATCAGTTTCACTTCCGAATCAAGGCGACGGATTTGGCCCTCCTGGTGGTTTCAACCCGAATTCCACGTTCGACAGTGTCG	MSAGRGEKPPCSICGEVGNGVHFGAEACRACAAFFRRSVALNKLYRCRGDGNCDILSTIRCMCRACRFAKCMAVGMKREAVQKYRDAYGKRGSDVESPGSSSVSLPNQGDGFGPPGGFNPNSTFDSVE	Z003_17535	Caenorhabditis_elegans	Y51A2D.17	zf-C4	zf-C4
143	15F02	pTH9175	TGTCACGGACCTACGGCGCGCCATGGACTATGTTAATCGGAATCTCG	TAGTGCACCACAATCCTGCAGGCTGGACCTGAAGATGTAGTAGATGC	ATGGACTATGTTAATCGGAATCTCGACGATAAGTTACTTTGCGGAATCTGTGGAAAATATTTCTCTGACGATGAAAGTTTACGCGAGCATCGGCGCCAGCGTCACATGACATGCCATATGTGCCTCTTGTGCAATCGACGAATTCCGGAGAACGAGACTCTCCGGGAGCACATGAAGAACAAGCATAACATCTGGAAATTGTTCATCTGTGTTTGCTGTAACTGGAGCTTCGGAACGGAAATTTATTTGAAGTGCCATGAAGAATGTATGAAAAGCACTGGGCGTCCTGGTTTGCTGAAACCGTTGGCTATGCCTATGACTGCACCGGCTCGTGAAGCTTCTGCCTTGAACACTGATCCACAAAATGGTTCCGATGATGTTCCTCACAGCTCCCCATCG…	MDYVNRNLDDKLLCGICGKYFSDDESLREHRRQRHMTCHMCLLCNRRIPENETLREHMKNKHNIWKLFICVCCNWSFGTEIYLKCHEECMKSTGRPGLLKPLAMPMTAPAREASALNTDPQNGSDDVPHSSPSPVPMIAENSIIQASSLKMEPIESADRSSASTSTPRTLVSGTPREKIPCGFCGKDFFHEGSLREHRRRFHMTGHTCLLCNRQIPENETVRDHMKSQHNIKKVYNCLCCNWTFLNQVHLISHKTCLKQTGKPCCRPGHMEPLAIPRTASIRQFFTLKTETQSGDDDSAAGSQLFSARLSCKSCGKFFYSERSLSKHHRQIHMSGHVCVLCNHQMPKTVTVQEHMEKEHNIRLVFNCRCCNWSFATRRCLMSHVECLKKAGDARNVKPV…	Z003_13193	Caenorhabditis_elegans	T05G11.1	zf-C2H2	zf-C2H2
144	14G11	pTH9176	TGTCACGGACCTACGGCGCGCCTTTGAAAGTGGACCTTTGGTTTATGA	TAGTGCACCACAATCCTGCAGGCCATCTGTCCCATTGTCTTCCA	TTTGAAAGTGGACCTTTGGTTTATGAAGATGTTGCAGCCGACATTGAAGCTGTTACCGAGCGTGCTTCTCGGAGGCACTACGAAAATAAAATGGTAGTAAAGAATTCGCGGGAAATGTTTGATAATGTTAATATCTTACCTGATGGACGATACTATTGCTGCCTTTGTAATCGTCCGTATAAAACACATGCCACATTGACAGCTCATCTGAGAGGATATCATTTGCGAAATGAAAGTTCTTGTGATGAACCAGGCTGTAATTTCTTGTCGTTCACAGATCAAGAAAAGAAGAGACATCGGAGAACACATGATAAAAAGAAAAAAGAAAGAAATTCTCAAGAATCTATGGTAATCCATGAAAAAATACAAAAAGCTGTGAGAAGATTGGACTATCCAGGT…	FESGPLVYEDVAADIEAVTERASRRHYENKMVVKNSREMFDNVNILPDGRYYCCLCNRPYKTHATLTAHLRGYHLRNESSCDEPGCNFLSFTDQEKKRHRRTHDKKKKERNSQESMVIHEKIQKAVRRLDYPGEDELRDHLNGSTEVQGTIRTMTKKGKIRYACLKCPHSVFNAYHAARHVEMHNDFPKNCFYCGEIRKGTVDLQVHYMRVHKHEGIRTFKCSVCHLRFTTTILFRDHVECENGCQNPEIRQDIYYGELPEGTIVDDLTQDRLQNFRKRQEIWKTMGQMV	Z003_9232	Caenorhabditis_elegans	F54F2.5	zf-C2H2	zf-C2H2
145	14A03	pTH9177	TGTCACGGACCTACGGCGCGCCATGGAGGAAGATAACCAAAGTCCT	TAGTGCACCACAATCCTGCAGGTAGATAATGGAGTATTTAAGTGAAGCA	ATGGAGGAAGATAACCAAAGTCCTAGTCCATCGGAATCATCAATTAAAACTGATTATGATGCCAAAATTCGAGTCTTGTATTCCACAAAAAATAATAAATCAGAAGAAGAATCAGTGTTTGCCCATCGTCTAGTCCTTTCAACATTCTCTCCCCTCTTCCAGCAATTGCTCCAGGATGCCACGTCATCAAGCACATCTACCACATCTTCCACATCATCAGATGACGTCATTTCAATCAGTTTGGATCTAACAGCGTTCCCAAACGCCCTTGCCGCATTCAAAGTGATACTGGAAGCGTTATACACTGGTGATATAAAAATGAAAAGTGTCGCAGCGAATGAGGTTCTCGCGGTATCTCGTCATTGTCAAATATCGAGTCTGGAGCCAAAAATCATGTCA…	MEEDNQSPSPSESSIKTDYDAKIRVLYSTKNNKSEEESVFAHRLVLSTFSPLFQQLLQDATSSSTSTTSSTSSDDVISISLDLTAFPNALAAFKVILEALYTGDIKMKSVAANEVLAVSRHCQISSLEPKIMSAVAPLPLNLANILNCSQSVPLNSNPFLQYTSPPIQNYLSSMISLWSNPFFSALFGNTTGTPSLPFSPQSDTENSRTQSEGSSPRANSTSTPPTTDLEKIVPNDDKEGWCRNKKYIEKVDGGFMCTVCRKIYGRYNSVSYHVTIYHRNPPIKCEENGCNFSTREARYIHFHKYYRHHIPLPENIDLGSRKCPFCRHVSKSPAMLEKHIARHETDGTSGGTPGALKRAQSKKKIVPTMTTDVIDPNVSSIFAPTNPAGNIPIQCSLCP…	Z003_5286	Caenorhabditis_elegans	F10B5.3	zf-C2H2	zf-C2H2
146	14G06	pTH9306	TGTCACGGACCTACGGCGCGCCATGTCAATTATTGATGACCGAACGG	TAGTGCACCACAATCCTGCAGGCTGATGGTTTTAGAATGTTCATCTCAT	ATGTCAATTATTGATGACCGAACGGATCCATCTTACGACGGCGAGGACTACGAAGCTTCTATAACGTTCGGAACCTATCAACAAGAAGAAGTCGCCCCGTTTGCTGTTCATCAGTGTAATGTGTGTAATAAAATGTTTATGAATTATAAAGGTCTCCAACAGCACTCTGTGATTCATACCGACACCAAACCATACATCTGCGATGTTTGTGGCCGAGGATTCCGATACAAATCGAATATGTTCGAGCATCGTACCGTTCACACCGGCTATACCCCTTATGTGTGTCCATTTTGTGGAAAACAGTTCCGATTGAAAGGAAACATGAAAAAGCACATGCGAACTCATGTGACAAGCAAAGAAGAGTTGGAAGCTGCTTATAGACCATATTCGAGCAATCGG…	MSIIDDRTDPSYDGEDYEASITFGTYQQEEVAPFAVHQCNVCNKMFMNYKGLQQHSVIHTDTKPYICDVCGRGFRYKSNMFEHRTVHTGYTPYVCPFCGKQFRLKGNMKKHMRTHVTSKEELEAAYRPYSSNRRSSGIIPSDALVIRGTSMPYYNPEKKRSVPKLLLGKDPSKWVDMICRNQLIPLSSFDDKIMRATMRLTNCHMASDVLEQAKPLEFEIFRCPICKCECSGREDCQLHMYASHDKKEAEEPNYCTKCMRVFADVDMYRQHQSYHSRVQLMIRNNELEMGSPEVDISQICYSMITNTENEMNILKPSA	Z003_8897	Caenorhabditis_elegans	F52F12.4	zf-C2H2	zf-C2H2
147	15H04	pTH9307	TGTCACGGACCTACGGCGCGCCCCACAAGTATCCCTGAGTATGGG	TAGTGCACCACAATCCTGCAGGGCTCCTGAAGCTGTCTGTTG	CCACAAGTATCCCTGAGTATGGGAAGACGAATTGTTCAAATGCCTACAGGTCTTCCTCGTTCATACCAAGATGAGAGTCACAATGAACCTGTGGGCTGGGATGAACCTTCGGGAGTTGGAGGATCTAGTGGAGCAGGAGGTCAACAATCTGACAAACCAACCGGACTCAGACATTTTTCCACGAAAGTTTGTGAAAAGGTGAAAGAAAAAGGATTGACGAATTACAATGAAGTGGCTGATGAACTGGTAGCAGATTACTTTCAAAATAATCTTATCAAGCAGATTGATGTTGTGAAACAAGAATACGATATGAAAAATATTCGGAGGAGAGTATACGATGCGTTGAACGTTCTTTTGGCAATGAATATCATCACAAAAAGCAAGAAAGATATCAGATGG…	PQVSLSMGRRIVQMPTGLPRSYQDESHNEPVGWDEPSGVGGSSGAGGQQSDKPTGLRHFSTKVCEKVKEKGLTNYNEVADELVADYFQNNLIKQIDVVKQEYDMKNIRRRVYDALNVLLAMNIITKSKKDIRWIGLPASASQEISRLEEEKSRREASISSKKQALEEMVLQIVSYKNLVERNRKNEHKNGRPENDTVLHLPFLIINTDKEANVECSVSSDKSEFLFSFDKKFEIHDDFEILKKLNLACSLETTNPTAEEVKTAKSFLPTLHQHYVDEIIANRKKVEAEKEEKRKQQQLIADQMSMNLSQAQYVEPTSSLAQMSYSSRFNRQLQEH	Z003_14530	Caenorhabditis_elegans	T23G7.1	E2F_TDP,DP	DP
148	13B08	pTH9314	TGTCACGGACCTACGGCGCGCCTCATCTTCGGGATCTGATCAAGAT	TAGTGCACCACAATCCTGCAGGGTTTGGGTAATTTCAGTTGCATTCC	TCATCTTCGGGATCTGATCAAGATCAGTCTGCAGATATGTCAAATGCTGGATCAACTGCTTCAACGAGTACTGGAAATCCAGTTGGACGTCCACAAAACGGTACACCTGGCCGTGGACGTGGTCGAGGAAGAAGCACAACAGCCGACATGCAACCCGACGAGAGGAGGAATACAATTCTCGAGAGAAATAAGGCTGCGGCTGTGAGATATCGTAAGAGGAAGAAGGAAGAACATGATGATATGATGGGAAGAGTTCAAGCAATGGAGGCTGAAAAGAATCAATTACTGGCTATTCAGACACAAAATCAAGTGCTGCGACGGGAACTCGAAAGGGTAACTGCGTTGCTTACTGAAAGAGAGTCACGATGCGTTTGTCTGAAAGGAGTTCCAATGAGTGAT…	SSSGSDQDQSADMSNAGSTASTSTGNPVGRPQNGTPGRGRGRGRSTTADMQPDERRNTILERNKAAAVRYRKRKKEEHDDMMGRVQAMEAEKNQLLAIQTQNQVLRRELERVTALLTERESRCVCLKGVPMSDEQHADHHHRNTNGMYSGSDMLNGLGQINGMQLKLPKL	Z003_1277	Caenorhabditis_elegans	C07G2.2	bZIP_1	bZIP_1
149	13C05	pTH9315	TGTCACGGACCTACGGCGCGCCCAACTGCAACATTGTGCCTATCA	TAGTGCACCACAATCCTGCAGGCGGAAACATGAAGTATTTTTCCACTTC	CAACTGCAACATTGTGCCTATCACGTTGGAGCATCGGTTGGCAGTAGTGGTTCAGCACTTAACAACAATTCAATTAATGTTCCTAATAATAATACAATGGGAATGTCTTCAGCAGGAAGCTCTAATGGGAGCAACTTAGTCAATGGCCAGCAAAGGTCAACTCGTGGAGCTTCAAAGCAACGCAGAGATCAGATCAATGTGGAGATTCAGAAGCTTCGAGATCTTCTTCCTCTATCAGATCTTATCAAGGATCGACTTTTCCAGTTACAAGTGATGTCCCTTGGGTGTATTTTCATACGGAAACATAGATATCAACAAACAGTTCTACAACCCCAGCTGCAAATGTTACAAATGCAGATGTCATCTCCAATGCCACGTGGCATCGATATCTGCAAAGCT…	QLQHCAYHVGASVGSSGSALNNNSINVPNNNTMGMSSAGSSNGSNLVNGQQRSTRGASKQRRDQINVEIQKLRDLLPLSDLIKDRLFQLQVMSLGCIFIRKHRYQQTVLQPQLQMLQMQMSSPMPRGIDICKALRGFMLMVTRSGKILHVSD	Z003_1828	Caenorhabditis_elegans	C15C8.2	HLH	HLH
150	13D08	pTH9316	TGTCACGGACCTACGGCGCGCCATGTCTTCTCCTGATTCAGCTG	TAGTGCACCACAATCCTGCAGGAGTATTTTTCCAAATTCATATAGACTT	ATGTCTTCTCCTGATTCAGCTGCTCATCAATTCTCAATTTGTCGAGTCTGTGATGATTCAAACGGGCAACCACATTATGGAACAATATGTTGTCCAAGCTGTAAAGGATTTTTCCGTCGTGTTTACATGTCTGACAAAAAGTTTGAATGTTATCGTGGCAACATGTGTGTAATTCAAAAAGGAACTAGAAACATTTGTCGAGCATGTCGATACAAAAAGTGCCTTCAAGTCGGAATGAATGTCAAAGGTAGCACCACAAGACACAATCTGCGTATTAACATTTATGTACAGACATCCGCGGAAAGTACTCCCAAGAGTTCAAAGGACACCGAAATGGGAGTGGCAGAGGCGATGGAAATGGCTCAAGTCTATATGAATTTGGAAAAATACT	MSSPDSAAHQFSICRVCDDSNGQPHYGTICCPSCKGFFRRVYMSDKKFECYRGNMCVIQKGTRNICRACRYKKCLQVGMNVKGSTTRHNLRINIYVQTSAESTPKSSKDTEMGVAEAMEMAQVYMNLEKYC	Z003_2438	Caenorhabditis_elegans	C26B2.4	zf-C4	zf-C4
151	13E03	pTH9317	TGTCACGGACCTACGGCGCGCCGAGCCAAAAACCGAGCCAAT	TAGTGCACCACAATCCTGCAGGACCCTGAACGCGATGTCTT	GAGCCAAAAACCGAGCCAATGGATGACTACAGCTACAACTTCTCAGATAATGACTTCAATTCCTTTGAGTTTTCATCCACTTCTGAAGAGCTAAAGAATATTGGCTGCCAAAAAATGAAGTCCTCAAAGATGCCTCTCCAAGACAGACCGTACAAGTGTCCACGAGATGGATGTGACAGGAGGTTCTCGAGAAGTGACGAGCTGACGAGACATATTAGGATTCATACAGGCCAAAAGCCATTCCAGTGCCGAATTTGTATGCGTGCCTTCTCCCGCTCGGACCATTTGACGACCCACGTGCGCACTCACACTGGCGAAAAACCATTCTCCTGTGACATTTGTGGCCGGAAATTCGCGCGAAGTGATGAACGAAAGCGGCACACGAAAGTTCACAAGACA…	EPKTEPMDDYSYNFSDNDFNSFEFSSTSEELKNIGCQKMKSSKMPLQDRPYKCPRDGCDRRFSRSDELTRHIRIHTGQKPFQCRICMRAFSRSDHLTTHVRTHTGEKPFSCDICGRKFARSDERKRHTKVHKTSRSGS	Z003_2528	Caenorhabditis_elegans	C27C12.2	zf-C2H2	zf-C2H2
152	13H02	pTH9318	TGTCACGGACCTACGGCGCGCCATGAAACTTTCCACTTCCTTGGAA	TAGTGCACCACAATCCTGCAGGTAAGTGGAGATAAACTCAAACGATTTT	ATGAAACTTTCCACTTCCTTGGAAATGCCTTTTAGAGAATCAACTGACCCTATTTGCTCTGTGTGCAACTTTTCCAGCCTGATTGCACCTCACTTTGGCGGTCTTGTGTGTAGTGCGTGTGCCTCGTTTTTCCGAAGAACTGTAGCCCTGAATATTCACTACTTGTGCAAAAAAGATAATCAATGCAAGGGAATGAGGAAGAATTGCAGAGCTTGTAGATTCGAGTCTTGTGTCAAAATTGCTGGAATGAAAAGGAGCTTAGTTAAAGAGAGAAAAAATCTTAACAATATCCCACTGTACATATTGAACAGAAGGAATGAAACTGGAAATCAGGGAGTTGTTAGAGCTTTTGTTTCGTCAAATCAAAACAGATTGGAAAATCGTTTGAGTTTATCTCCA…	MKLSTSLEMPFRESTDPICSVCNFSSLIAPHFGGLVCSACASFFRRTVALNIHYLCKKDNQCKGMRKNCRACRFESCVKIAGMKRSLVKERKNLNNIPLYILNRRNETGNQGVVRAFVSSNQNRLENRLSLSPLT	Z003_4233	Caenorhabditis_elegans	C54C8.1	zf-C4	zf-C4
153	13H03	pTH9319	TGTCACGGACCTACGGCGCGCCATGCAAACACCAGCTACAATCA	TAGTGCACCACAATCCTGCAGGTATCGTGAAGACTTGGATCCGT	ATGCAAACACCAGCTACAATCACGCGAGATTCGGATGACTTTGAGAAAGTATGTACTGTATGCCGACGCCCAGCGTTCACCAGATATTATGGGGCAGTCTCCTGTGAAGCATGTAAAATGTTTTTTCGCCGGATGATTATTGAAAAACTATCATACGATTGCAAGAAAATCAATAATTGCTATGAAACTTCAAAGGGGACTCGATTCAAGTGCAGGTCATGCCGGTTCAAACGATGCCTGCAAATGGGGATGAAGCTTCCCCCGTCGAACTACACAACGTTGGAGCTCAAAGATAACAAAATTGATGAGCTAGCTAATTTATTGACTGATTTGAAATTACGAGACGAAAAACGTTGTGATCGCTTTATGACATTTTACACTACGACGGATCCAAGTCTT…	MQTPATITRDSDDFEKVCTVCRRPAFTRYYGAVSCEACKMFFRRMIIEKLSYDCKKINNCYETSKGTRFKCRSCRFKRCLQMGMKLPPSNYTTLELKDNKIDELANLLTDLKLRDEKRCDRFMTFYTTTDPSLHDI	Z003_4291	Caenorhabditis_elegans	C54F6.8	zf-C4	zf-C4
154	14F10	pTH9320	TGTCACGGACCTACGGCGCGCCATGAAAGTTTTTAAAACGTTATTGTCA	TAGTGCACCACAATCCTGCAGGACGTTGGATTCTCCGATGTGT	ATGAAAGTTTTTAAAACGTTATTGTCAATGGATAGGAGCACTTTAAAATGTTTAATTTGTGGAAGAAATGCATCTTGTCATAATTATGGGGTGCTCACGTGCAATGCGTGCAAAATGTTCTTCCGACGCGTTGTGATTGAGCAGATAACCTACCAGTGCAGGAACTGGAAAAAATGCCTCGAAAATGCCGATCAGTTCAAACCACGATGCAAAGCTTGTCGCTTTGAAAAATGCGTGAGACTTGGGATGAAGCTTGGCCCAATAGCAATGGAAAAACTTTACAAAACGAAACCGATGAGTCATCCAGATTTTGCAACAAATGCTCTAATCCAAGAAGTTTTGTATTTAAACTACACAAAACGGTACAAATTATGCAATTTCTACACATCGGAGAATCCA…	MKVFKTLLSMDRSTLKCLICGRNASCHNYGVLTCNACKMFFRRVVIEQITYQCRNWKKCLENADQFKPRCKACRFEKCVRLGMKLGPIAMEKLYKTKPMSHPDFATNALIQEVLYLNYTKRYKLCNFYTSENPTL	Z003_8546	Caenorhabditis_elegans	F47C10.7	zf-C4	zf-C4
155	15C06	pTH9321	TGTCACGGACCTACGGCGCGCCATGAATGCCTTGTGCTCATCTAG	TAGTGCACCACAATCCTGCAGGATTGAACGTCAACGTAGACTTTCG	ATGAATGCCTTGTGCTCATCTAGCTCATCTTTTCCCGATCTCATAGTTGCCGTATCGGAAAAATGCCCGGTTTGCTGGAAACACACAGCACACGGAATGCACTTTGGAGCATTCACTTGTCGAGCTTGTGCAGCTTTTTTCAGACGTTTCGCTACTACAAAAAATCTTAAACCCTGCAAAAAGAGCAATGTTTGTGAGTTTACCAAAAATGGATATACGAGTTGCAAAAAGTGCCGACTACAGAGATGTTTTGATATTGGAATGAAAATTGACAATTTCCAATTTGAGAGGGATCCCTATAAAAGCGGAAAAATTCCATTTACTTTGGACACCTACCTTGACAGGCCCAGTTTGATCATTTTCACAGCTCTTGCAGAACTTGACTCACGAGACTCGAAA…	MNALCSSSSSFPDLIVAVSEKCPVCWKHTAHGMHFGAFTCRACAAFFRRFATTKNLKPCKKSNVCEFTKNGYTSCKKCRLQRCFDIGMKIDNFQFERDPYKSGKIPFTLDTYLDRPSLIIFTALAELDSRDSKVYVDVQF	Z003_11573	Caenorhabditis_elegans	M02H5.5	zf-C4	zf-C4
156	15D06	pTH9322	TGTCACGGACCTACGGCGCGCCGTCAACTCGCAACGCAACG	TAGTGCACCACAATCCTGCAGGCTTGTGTGAGCTGGTCGATG	GTCAACTCGCAACGCAACGAGGATCCGTCAATGTATATGAATGGATCAGCCGCCTCCGTTTCCCACACCAACGGCTCATCCTCGATGGGCAATGATCAAAAATTTCCGTCTTATAAGCGAATGGCTCAACGAAGGAAAGTGCCCGAAGGAGAGCTGTGCGCAGTTTGCTCGGACCTTGCCACTGGATATCACTACGGAGTGGCTAGCTGCAATGGATGCAAAACCTTCTTCCGACGAACAATAGTCAGTGAGCAAACCTTCATTTGCCAATATAATGGAAATTGTGATGTTAATAAAAACATTCGATGTGCATGCCGTCACTGCCGCTTCAACAAATGCCTATTGGTGGGGATGGACGCAAAAGCCTTACAAATTCCAGCAATCCAGAATGATCGAGAT…	VNSQRNEDPSMYMNGSAASVSHTNGSSSMGNDQKFPSYKRMAQRRKVPEGELCAVCSDLATGYHYGVASCNGCKTFFRRTIVSEQTFICQYNGNCDVNKNIRCACRHCRFNKCLLVGMDAKALQIPAIQNDRDRIGPTKKIKMSSGSDDEQATTPHRLQDQEIIDQLTQV	Z003_12346	Caenorhabditis_elegans	R09G11.2	zf-C4	zf-C4
157	15G03	pTH9323	TGTCACGGACCTACGGCGCGCCCCTTTTCATCCACAATTCTATCCGG	TAGTGCACCACAATCCTGCAGGGTGATTCACTTGAGGATACAGTGATC	CCTTTTCATCCACAATTCTATCCGGCACCACTTGACATGGGCACAAACTTCAAGCAAGAAATGAGAACTCCACCAATCGACGGGCACATTGATTACAGAAAATTTGATGCTAGCGGAAAGAGAATGGAGTTTCAGCCACCGGGTGCTTTGCATGACTGTCAAGTGTGTTTGTCAACTCATGCTAACGGGCTTCACTTTGGAGCCCGTACATGCGCCGCATGTGCTGCGTTTTTCAGAAGAACTATCAGCGATGACAAACGATATGTCTGTAAGAGGAACCAACGGTGCAATAATGCAAGCCGCGATGGAACTGGGTATCGGAAGATTTGTCGGAGTTGTCGAATGAAACGATGTCTGGAAATTGGAATGCTTCCAGAAAATGTGCAGCACAAGCGAAAT…	PFHPQFYPAPLDMGTNFKQEMRTPPIDGHIDYRKFDASGKRMEFQPPGALHDCQVCLSTHANGLHFGARTCAACAAFFRRTISDDKRYVCKRNQRCNNASRDGTGYRKICRSCRMKRCLEIGMLPENVQHKRNRRDSGSPPRKTPFDTFFNGFYPSFQPSGSAAQPITVSSSESP	Z003_14041	Caenorhabditis_elegans	T18D3.2	zf-C4	zf-C4
158	16A03	pTH9324	TGTCACGGACCTACGGCGCGCCATGAACCAAGTCTCTACGTCAACT	TAGTGCACCACAATCCTGCAGGTGACGTCTATCAGGACTTTGGAG	ATGAACCAAGTCTCTACGTCAACTTCTCCATTTTGCTGTAGAATTTGCGATCAGAGAGCTCATGGCAACCACTTTGGAGTTATTAGTTGTCGGGCGTGTGCTGCTTTTTTCAGAAGAACTGCTTCTGGGAAATGGGATAACCAAAAGTGTCGTGGAGGGTCTTGTGATAAGAAAACGTACTACTGCAAACCGTGTAGATTACAAAAATGTCGAGACATGGGAATGGACACTACCAAATTCCAATTCAACCGAGACAACATTCCCACCGCTGGTCAATTCCAACTCCCTCCGCAAACTTTCGAAGCTTATGTCGGACGGCCCGAATTCCTGCTCTTCTGTGATACCGATGCTCCAAACTCCAAAGTCCTGATAGACGTCA	MNQVSTSTSPFCCRICDQRAHGNHFGVISCRACAAFFRRTASGKWDNQKCRGGSCDKKTYYCKPCRLQKCRDMGMDTTKFQFNRDNIPTAGQFQLPPQTFEAYVGRPEFLLFCDTDAPNSKVLIDVR	Z003_14824	Caenorhabditis_elegans	T27B7.6	zf-C4	zf-C4
159	16B08	pTH9325	TGTCACGGACCTACGGCGCGCCCAATGGAGTCACCAAAATCATCAG	TAGTGCACCACAATCCTGCAGGACGATCGACAGAATTCCATGTACT	CAATGGAGTCACCAAAATCATCAGGGCCATCAAAGTCAGTCTACTTCTACCGGTCCTACACCACATTCTCACATGACACATGTTGTTCCTCAGCAAAAAGAAGAGGTTCAGTACATGATGCGTCAAGTAACAGATAGTGTTAGATTTGCAATGTGTGAAGCAATTGCACACAGACCGGGTCTTTGGGATTCAACACGAGAAAAAGTGAGCTCGGCAGCACGGAAAAATCTCTTTGCTGAAGTTGTTGAGGTGATTAATCAACAGTTCGTGTTGAGCCCTCCGCTCACAATCGAAGAAATCGAAAAGCATTGGAAAAATCTGAAAGACACATACGTGAAAACTCGACGGAAGTTAACATTTGATCATGATGGATGCCCTATACGACCGAAATGGAAGTTT…	QWSHQNHQGHQSQSTSTGPTPHSHMTHVVPQQKEEVQYMMRQVTDSVRFAMCEAIAHRPGLWDSTREKVSSAARKNLFAEVVEVINQQFVLSPPLTIEEIEKHWKNLKDTYVKTRRKLTFDHDGCPIRPKWKFFDSLMFLDSVNQNDFVMKKRPMQFQGQPYDLYQGPSSKKEKLEEMPSDEYMEFCRSL	Z003_15794	Caenorhabditis_elegans	Y106G6H.4	MADF_DNA_bdg	MADF_DNA_bdg
160	16D04	pTH9326	TGTCACGGACCTACGGCGCGCCATGGCAAAAAACTTCGAACCGT	TAGTGCACCACAATCCTGCAGGCCAGGTGGGAATATTGATTTTTAACG	ATGGCAAAAAACTTCGAACCGTGTAAAATCTGCAATTCACCGGGAAACGGCCTACATTTTGGAATCGATGCTTGCAGAGGCTGCACCTCATTTTTCCGGCGAACAATTGTACAGGAAAAAGAATATTACTGCAATTCGGATGACTCGTGTGAAATTGGGAAAAGTGAAGCTGCTCTAAAATCTCCTTGCAGAAAATGCCGATTTGCAAAATGTTTGGAAGTTGGTATGAAAAGTGAAGCAGTACAAAAGAATCGAGATTCCTATGGAAAACGCCGAGAACTTGCCATTTATGCAGCTAACCCCTCTCCATCAAGCGTCCGTCTCAAATTCCCAGCCCCCTACTTCATGCTGGAATCCGTTAAAAATCAATATTCCCACCTGG	MAKNFEPCKICNSPGNGLHFGIDACRGCTSFFRRTIVQEKEYYCNSDDSCEIGKSEAALKSPCRKCRFAKCLEVGMKSEAVQKNRDSYGKRRELAIYAANPSPSSVRLKFPAPYFMLESVKNQYSHLE	Z003_16851	Caenorhabditis_elegans	Y41D4B.9	zf-C4	zf-C4
161	13A07	pTH9348	TGTCACGGACCTACGGCGCGCCAATGAGCCAAAACTATGCAAATTCATA	TAGTGCACCACAATCCTGCAGGCTGTTTGTGAAACGTTTGATGTTGT	AATGAGCCAAAACTATGCAAATTCATAAAAGAAGAATCACCACATAAAGTTAAACAGGAACCATATGATGATGAAGACCTTGTACATTTGGGATCCGAATCAATTCCATCACCAACTTCATCCACTTCGCCTCCATTTCCTACAGAACCTGCGGTTCAAACAATTAAACTTCCCAAATATATGGAGTTAAAATGTGGTGCCCTCGTTGCTCGACTTCACACTGAATTGTTTATTTGTCCTGGAATTCGAGAAAAATGCATCGAAGTACTAGACTGTCCCGGAGAGTTATTGACACCTGTTGAGTTTACAATCAAGGCTGAAAAGAGCAAGCAAAAAGACTGGAAAGGAGCGATAAAGCATAATGGAAGGATGTTAAGAACACTCATGGAATTCAAACAA…	NEPKLCKFIKEESPHKVKQEPYDDEDLVHLGSESIPSPTSSTSPPFPTEPAVQTIKLPKYMELKCGALVARLHTELFICPGIREKCIEVLDCPGELLTPVEFTIKAEKSKQKDWKGAIKHNGRMLRTLMEFKQLDFYNHHEMCSFKCHSRNYITKNGGSVPKLPPKNVQRRHSSASTTSNVSQTA	Z003_582	Caenorhabditis_elegans	C01B12.2	SAND	SAND
162	13E05	pTH9349	TGTCACGGACCTACGGCGCGCCATGATTAGCGGCCCATTTCTTC	TAGTGCACCACAATCCTGCAGGGGAATTGTTCAATTGGATGGGATAC	ATGATTAGCGGCCCATTTCTTCACTTTGATCCAACTGTTCCACTCCAGACAGTCATGATCGGACACCCGGCGACGTCTCCTTTGTCGCTTCCATCATCATCGTCTAGTCCGACCGTTGCCGACCCATCGAACATTCATTGCCGAGTTTGCGAGAGACGATACGACGGTTCGCAGCACTTCGGAATTGATATTTGCCGAGCATGTGCCGCATTCTTCCGACGAAGTGTAGCTGTCAAGAAGACATTCGTCTGTAGACGTGGAACCAACAAATGTGAACTTAACACAGTGTCTCGAAAAACCACATGCCAAAAGTGCCGATGGATGAGGTGTCTTCTTGTTGGTCTTAATGTTGATGCAGTAGTTGGCCGACGATCACCCGACCATGTCAAGACAACATCA…	MISGPFLHFDPTVPLQTVMIGHPATSPLSLPSSSSSPTVADPSNIHCRVCERRYDGSQHFGIDICRACAAFFRRSVAVKKTFVCRRGTNKCELNTVSRKTTCQKCRWMRCLLVGLNVDAVVGRRSPDHVKTTSRDESVKKEDEESDTGSEGKSCEDMDVSHPIEQFQ	Z003_2648	Caenorhabditis_elegans	C29E6.5	zf-C4	zf-C4
163	13F06	pTH9350	TGTCACGGACCTACGGCGCGCCTACACCGCCTTTCCGACGC	TAGTGCACCACAATCCTGCAGGATTTGGCAGCACTGTGTGC	TACACCGCCTTTCCGACGCTCGGCTACACTGCTTATCCACAATTTGCATTTGCTGCCGCAACCACGGCACCCAGTCTTACATCGGCAACCACAAGCTCAACGACAATGGCGCCAATGGCTCCAAACAGTGAAAGCGGTCGTCGAGCAGGTCGGCGTGAACGTACCTCGTTCAACAGAGGACAACTCGATCAGCTGGAAAAAGTTTTCCGCGAAACACAGTATCCGGATGTGCACAGAAGAGAAGCATTGGCGAAGGCAATCAATTTGCCTGATGGAAGGGTACAAGTAATTACGGTTTGGTTCAAAAATCGACGAGCCAAGGATAGAAACAACAAAAAAATGGATGGAGTCCATCCGGGAAGCACTTCATCAAGATCATCCAATGGTTCTCCACACAAC…	YTAFPTLGYTAYPQFAFAAATTAPSLTSATTSSTTMAPMAPNSESGRRAGRRERTSFNRGQLDQLEKVFRETQYPDVHRREALAKAINLPDGRVQVITVWFKNRRAKDRNNKKMDGVHPGSTSSRSSNGSPHNESKPDTKSLGIHIPGTPEFNAHSAAKY	Z003_3270	Caenorhabditis_elegans	C37E2.4	Homeobox	Homeobox
164	13H09	pTH9351	TGTCACGGACCTACGGCGCGCCATGGTGCGAGTTATTATCAAAGGAG	TAGTGCACCACAATCCTGCAGGAGAGCATTTCCAATTCATCATCATCC	ATGGTGCGAGTTATTATCAAAGGAGGTGTGTGGAAGAATACAGAGGATGAAATCCTCAAAGCAGCTATTATGAAATACGGAAAAAATCAATGGAGTCGAATTGCTTCACTGTTGCACAGAAAATCAGCAAAACAATGCAAGGCTCGTTGGTTCGAGTGGCTTGATCCAGGAATTAAAAAGACAGAATGGTCACGTGAAGAAGATGAAAAACTTCTTCATCTCGCTAAGCTGATGCCAACGCAATGGAGAACAATTGCACCAATTGTCGGAAGAACATCAGCGCAGTGCCTGGAACGATATGAGCATTTGCTGGATGAAGCTCAACGAAAAGCAGAAGGTCTTGATGAAGAAGCTACTGAAACTAGAAAATTAAAACCTGGAGAAATCGATCCAACACCT…	MVRVIIKGGVWKNTEDEILKAAIMKYGKNQWSRIASLLHRKSAKQCKARWFEWLDPGIKKTEWSREEDEKLLHLAKLMPTQWRTIAPIVGRTSAQCLERYEHLLDEAQRKAEGLDEEATETRKLKPGEIDPTPETKPARPDPIDMDDDELEMLS	Z003_4544	Caenorhabditis_elegans	D1081.8	Myb_DNA-binding	Myb_DNA-binding
165	14F07	pTH9352	TGTCACGGACCTACGGCGCGCCATGTCGAGTGACACGTCCG	TAGTGCACCACAATCCTGCAGGTCATAGCTCTCCGTGCATCAA	ATGTCGAGTGACACGTCCGTTCAATTAGTACCAAATTGTTCTATTCAATGCTCGGTTTGCTGTCAACTAGCGTTCGGACTGAATTATGGTGTACCATCCTGCAATGCTTGCAAAATGTTTTTTCGCAGAATGAACATCATTAAGCCATCGTATACTTGCCTTGCAGACGGTTCATGTTACACAAATTTTGGTTTTACTCACGGTCGCCCGAAATGCCGATCATGCAGATTCCGAAAATGCTTAGATGTTGGCATGAAGTATCGGAGCACGGAAGAAGAAGATGAGATGATGTTAATAATGTTAAAATCAAGCACAGCTCAGCTGCAACCAGATATTTTTGTGACAGTTGCCGATGAACTTTACGGTTCGATAAACTCTCTGCGACAACTTGATGCACGG…	MSSDTSVQLVPNCSIQCSVCCQLAFGLNYGVPSCNACKMFFRRMNIIKPSYTCLADGSCYTNFGFTHGRPKCRSCRFRKCLDVGMKYRSTEEEDEMMLIMLKSSTAQLQPDIFVTVADELYGSINSLRQLDARRAMN	Z003_8541	Caenorhabditis_elegans	F47C10.1	zf-C4	zf-C4
166	16G08	pTH9353	TGTCACGGACCTACGGCGCGCCTTCGCCTGGTTCCAGCAGC	TAGTGCACCACAATCCTGCAGGAAATAACATGCTTCTGGTCCTCC	TTCGCCTGGTTCCAGCAGCAGTACTCACAACTCTCCCCATCCTCGTTTCCTCATCCTATGGTGGCTCATCACGCTGGCTTCATCCCACCACCGCCGTCTTTTCTACATCATCAGCATCAGCAGCATCCAAGAGCTCCTTCAGAAAAGCGGAGAGGCGCTCGAACTCCGTTCTCCGATTCTCAGCTTTACGCGTTGAGAACCAGATTTGAGCAGTGCGACACAATAAAGGTTGACGAGCGACGGAAGTTGGGAGCAGTCATCGGACTTTCGCCCGAGCAGATCAAGATTTGGTTTCAGAATCGGAGATTCAAGTTGAGAAAGGAGAAATACAAGCAGATCAAGCAGGACGCTGTGCAGCAACAGAAATCGGCGAAGGAGGAGGCGGAGGAGGACCAGAAG…	FAWFQQQYSQLSPSSFPHPMVAHHAGFIPPPPSFLHHQHQQHPRAPSEKRRGARTPFSDSQLYALRTRFEQCDTIKVDERRKLGAVIGLSPEQIKIWFQNRRFKLRKEKYKQIKQDAVQQQKSAKEEAEEDQKHVIS	Z003_18896	Caenorhabditis_elegans	Y80D3A.3	Homeobox	Homeobox
167	16G11	pTH9354	TGTCACGGACCTACGGCGCGCCGAAGAAATTCTTCAACGTGTTCGTC	TAGTGCACCACAATCCTGCAGGCTTCCATTGGTGGAACTTCAACT	GAAGAAATTCTTCAACGTGTTCGTCTCGGAACATCTGGATCCACGTCATCAGCCAATAATCTGAGGAATAGTTTAAGTGAAGCTACAACAACAACAACAGGATCCGTTGAATCGACTTCTGGAACAGCTGATGGATCGGCTCCGGGACAATACTATTGTTTTATTTGCGAGAAAGATTTTCGTCGTCCTGATATTCTATCAAGACATACTCGAAGGCATACCGGAGAGAAACCATTTAAATGTGAAGATTGTGGACGATTTTTCTCAAGATCTGATCATTTGCGAACTCATCGGAGAACTCATACTGATGAGAAACCATATCATTGTTGTGTTTGTAATTATTCGGCTAGACGGCGTGACGTTCTCACACGTCACATGTCGACAAGGCACCAAGCAATT…	EEILQRVRLGTSGSTSSANNLRNSLSEATTTTTGSVESTSGTADGSAPGQYYCFICEKDFRRPDILSRHTRRHTGEKPFKCEDCGRFFSRSDHLRTHRRTHTDEKPYHCCVCNYSARRRDVLTRHMSTRHQAIAPPSILGTHRNVRRCLSDGDYHKMAAQELRQRHQATREEVEVPPMED	Z003_19210	Caenorhabditis_elegans	ZC328.2	zf-C2H2	zf-C2H2
168	16H10	pTH9355	TGTCACGGACCTACGGCGCGCCAATGCAACCATGTACAATTTGTTAACC	TAGTGCACCACAATCCTGCAGGAAAGTATTGGTTTGAATGCGGACA	AATGCAACCATGTACAATTTGTTAACCGCTCGTTCTGCAGAAGATTGTTCAACTATTTCGACACCAGGACCTTTGAAAGTTTTCCCCAGAAGCAAAGATGACATGACGTTCGCACCGAGAGATGACTCAAGTCGTGCCAAGCAAATGCAGTACCCATGTACACTTTGTGGGCAGGCGTTTGCGGTACATGATCGATTAGCTAAGCATATAGCGTCTCGACATCGCCAGCGAAGTTGTACATTAGATGATGCTTCTAAAGTCCACAAATGCAACATGTGCTCAAAAAGCTTCTCGAGAAGTGATATGCTGACAAGGCACATGCGTCTTCACACGGGAGCAAAACCATACAGTTGTCCGACATGTAATCAAGTATTCTCTCGTTCTGACCATTTATCCACT…	NATMYNLLTARSAEDCSTISTPGPLKVFPRSKDDMTFAPRDDSSRAKQMQYPCTLCGQAFAVHDRLAKHIASRHRQRSCTLDDASKVHKCNMCSKSFSRSDMLTRHMRLHTGAKPYSCPTCNQVFSRSDHLSTHLRTHTGEKPYACPMCNYSASRRDMISRHMRTHSLTDDSSISTPISQLSIRSATTSPLPPKIGSTATVEIGSGLLSAFKPILS	Z003_19698	Caenorhabditis_elegans	ZK337.2	zf-C2H2	zf-C2H2
169	15G06	pTH9390	TGTCACGGACCTACGGCGCGCCGAGGAGAAATCCGGAAGGCA	TAGTGCACCACAATCCTGCAGGCTTTCCAATTTTTGTTCAGCCAATCA	GAGGAGAAATCCGGAAGGCATTACTTACCAACCACACCCACCGAATTGAAGGAAGTAACAAAAGAAGAACCACTGTTGATGAGTGCACCATCAAGTGTCAAATCAATGCGACGACAAGCTCCAGATTCCACATTGCACCCAGAAGAACGCAAAAGAATATTGCATTTACACGCTGAGCAAAACCGAAGAAGTGCACTGAAAGATGGATTCGACCAGCTTATGGATATTATACCCGATTTGTATTCTGGCGGTGTTAAGCCAACGAATGCTGTCGTTCTAGCCAAGTCAGCGGATCATATTCGAAGATTGCAGGCCGAAAAATGGGATAAAACACAGAAGATCGACGAGGCCAAAGCGAAAATCGAAAAACTGAATCAGAAAATAACATCCTTACAATCA…	EEKSGRHYLPTTPTELKEVTKEEPLLMSAPSSVKSMRRQAPDSTLHPEERKRILHLHAEQNRRSALKDGFDQLMDIIPDLYSGGVKPTNAVVLAKSADHIRRLQAEKWDKTQKIDEAKAKIEKLNQKITSLQSNLPQSSAPSSSSQVDSKTSLETFFDRYVKEGAKKNWRFWVMSQMLKPICVTQTNSFASSVAGDSSSRNEVAASCSDWLNKNWKA	Z003_14154	Caenorhabditis_elegans	T20B12.6	HLH	HLH
170	16E08	pTH9391	TGTCACGGACCTACGGCGCGCCGCTCAACATTTCGCGCCATA	TAGTGCACCACAATCCTGCAGGAACTCGGCATATTCGCCATG	GCTCAACATTTCGCGCCATACGCGAATCCCCATGCCACGTCATCTTTTTCCCCGTCATCGTCTTCCACGTCATCCACCACGTCGTCTCAAAATCAGCAGAGTGGCAGCAGTGGGAGTAAGAAGAAAAAACCGGTTCCGGTGCCGGAAAATCAAAAGGATGAGGCCTATCTCGACCGGCGCCGCCGAAACAACGAAGCCGCCCGTAAATCCAGAGAATCTCGCAAGAAAGTCGATCAGGACAATAGTGTTCGTGTAACATATTTGGAGAGGGAAAATCAATGCTTGCGAGTCTACGTCCAACAGCTCCAACTACAAAACGAATCGATGAGACAACATTTGCTCCTGCAAAATCCGGGCACTATAGACACTATGGACCCGATTGCCATGGCGAATATGCCG…	AQHFAPYANPHATSSFSPSSSSTSSTTSSQNQQSGSSGSKKKKPVPVPENQKDEAYLDRRRRNNEAARKSRESRKKVDQDNSVRVTYLERENQCLRVYVQQLQLQNESMRQHLLLQNPGTIDTMDPIAMANMPSY	Z003_17581	Caenorhabditis_elegans	Y51H4A.4	bZIP_1	bZIP_1
171	16D01	pTH9394	TGTCACGGACCTACGGCGCGCCCAAATGAACGAGGATGGAATGATGA	TAGTGCACCACAATCCTGCAGGAAAGTCGTAGAGTTTGTTGATTAATAT	CAAATGAACGAGGATGGAATGATGAATATGGGAAATGATTATGGAGATATTAATGGACAAGGACTCGGTGAAGCACCAAAAAGATGTGCATGCACGTGTCCAAATTGTTTACAGCAGAATAATCGACAAGGAGACGGAAAAAGTCGAATTCACATTTGTCATTTATGCAACAAAACATACGGAAAAACGTCTCATTTGAGAGCACATTTACGTGGACACGCTGGTAATAAACCATTTGCATGTGATTGGCAACATTGTAATAAGAAGTTTACAAGAAGCGACGAACTTCAACGTCATCGACGAACCCACACTGGAGAGAAACGATTCGCGTGTAATCACTGTGGAAAGAAATTCATGAGAAGTGATCATTTGACAAAACACGAACGAACACATCAATCG…	QMNEDGMMNMGNDYGDINGQGLGEAPKRCACTCPNCLQQNNRQGDGKSRIHICHLCNKTYGKTSHLRAHLRGHAGNKPFACDWQHCNKKFTRSDELQRHRRTHTGEKRFACNHCGKKFMRSDHLTKHERTHQSNRINNINQQTLRLS	Z003_16772	Caenorhabditis_elegans	Y40B1A.4	zf-C2H2	zf-C2H2
172	13A12	pTH9401	TGTCACGGACCTACGGCGCGCCATGGCGAAGGACCACCGAT	TAGTGCACCACAATCCTGCAGGTTATTCCATTATTCTTCTCCAAATATT	ATGGCGAAGGACCACCGATGTCCACAATGTCTTCTCGAATTTCCGTTTGCTTCGAAACTTCAGCGACATTTGGAGACACATCTCATCACTGGAGGTGATTGGCTCTGCGGATTATGTGATACGCTTTTCAATCGATCGTCTTCTCTAACAAATCATTGGAGAAATTCGTGTGCAAAAGTCAAAATGGCTTTCTGTGATGATGAGCTCAAGGAAATGTTGGTGTACGATCTTCGGGAAGCAGTTTTTCGAATGACACTCGATCACTATTCAGCTTCTGAAAAGAGCCCTGAAGAGCCTGGAACAAGCAGCAGCTACAAAACTGCTTCAGACGATAAAACTTCCATATGCATCTATTGCAATTTGCTCATGCCACGTGGAACTCTACATCATCATTATAGT…	MAKDHRCPQCLLEFPFASKLQRHLETHLITGGDWLCGLCDTLFNRSSSLTNHWRNSCAKVKMAFCDDELKEMLVYDLREAVFRMTLDHYSASEKSPEEPGTSSSYKTASDDKTSICIYCNLLMPRGTLHHHYSVHTGRCCPAEITQNSVVPYVCDLCGFGFRYKKSLYNHWRHKCTEVLAHFPDGGNIENQELNVMVEDLVKRAEVINPIELPSKRDGEDIEKEDSGDIDDDEETSPYFTAPITALSFDLQDWNVENVSSTEECPKCNRYFHSLGRLDQHTHAFHGTARPGFVCKLCRMKFAENRILLAHLRSGCKPMRVEVPDEKKRKKMSAEELMKVVENEKSTWIELFENKKAANLKFIKEFLDQIDRRKPHGYASSQIVLNRPVPAHSIEIDTKM…	Z003_931	Caenorhabditis_elegans	C04F5.9	zf-C2H2	zf-C2H2
173	13D12	pTH9402	TGTCACGGACCTACGGCGCGCCTTAGACGAAAATTCCGATGCAATTTT	TAGTGCACCACAATCCTGCAGGGAGCCAAGATCTTGACGTCATC	TTAGACGAAAATTCCGATGCAATTTTCGAGGAATGGGCAGCTGAGTGCACTCCCGACGCGCAAAAAGAGCACGAAGAGCTCGAGGAGATTGTCAAGATTCCAGATTCGACATACAGAAAAAAGAAAGGAAATCAAAAGTTGCCGACGGTGACGACGTGCGAAGTATGTGGAGTTGCGTTGAAATATCCATCGAGGATTATGGAACACATGAGAACTCACACAGGCGAAAAACCATACGAATGTGACATTTGTGGAATGAGATTCACTCAAAGAACTCCAATGATTAACCATTTTCGTGTTCAACACATGGGTGATCTCCCATTTCTGTGTAATTTCGGTTGTGGCAAACGATTTGTGAATAATTCACGCAGAACTGCACACGAATTAAGCCATAATGGA…	LDENSDAIFEEWAAECTPDAQKEHEELEEIVKIPDSTYRKKKGNQKLPTVTTCEVCGVALKYPSRIMEHMRTHTGEKPYECDICGMRFTQRTPMINHFRVQHMGDLPFLCNFGCGKRFVNNSRRTAHELSHNGLKRAGPARPYLKPVKKIVCPSMDMDILSNSALANYISPPTIDSIFQSDPSTSSSSPSQFQSSNQTTKQSIYPSEKEMEKAAISNARIDDVINTVLARVLAPIDEEIPIEEPEKAPQKRAYISNRRATLAQCNICGLMLKHPSKIADHIRTHTGEKPFECGECGLSLSKASSLKVHIRRMHTGERPFECTWRCGLSFVTDSVRKEHEMTVHTGIKRYTCVVKGCNAVFARRVYLMRHRKNAHPELFTPIFDHVQVNHEESQDSVIVY…	Z003_2495	Caenorhabditis_elegans	C27A12.3	zf-C2H2	zf-C2H2
174	14D03	pTH9403	TGTCACGGACCTACGGCGCGCCCTTCGTAGAATGGCAATTAAAATCGG	TAGTGCACCACAATCCTGCAGGTTCTGTAGGGATGTCGTTCGG	CTTCGTAGAATGGCAATTAAAATCGGACAACGAGTTCTTCGGTTTAAAGTTATCAGTGCAGAAGAAGCTCCAGAAGCTCCACTTGACACACAGGATTCATGGATTAACGATCCGAAGCCCGTTACAACGCCGAAAGCATTAGCTGGATTATATCGGTGTACTAACTGCAAAACGTATTTCGGAAATAAAGAAGTATATCAGAGACATATTCAGGAAGTTCACGGAGATGCTCGTCCATTCCGATGTTTCAATTGTGGAATGCGATTTGCAAATAAAACCTCGATGACACATCATTTAAAAGATCATTCGTTATTGAAACCAATGTTTTCGTGTGATTATTGTCCTCGGATCTTTTCGAAATTGGAAAGCAAAACTCGGCATCATAAAATGCATTTCACG…	LRRMAIKIGQRVLRFKVISAEEAPEAPLDTQDSWINDPKPVTTPKALAGLYRCTNCKTYFGNKEVYQRHIQEVHGDARPFRCFNCGMRFANKTSMTHHLKDHSLLKPMFSCDYCPRIFSKLESKTRHHKMHFTRSTCQTCMRFFTTEDALRHHQSTAHPATFDSGPPPEDLLPNGKSARYSCSYCNLRFHFKKDMLVHERIHTGEKPYSCGYCMKSFAQSQALTAHIRTHTKELPYGCGKCDKRFRDNSCLRKHELAAHTDEPIVRPISVAYSNQVQKQMQRQRENRRKQELLIAERHPYRI	Z003_7397	Caenorhabditis_elegans	F35H8.3	zf-C2H2	zf-C2H2
175	13C02	pTH9437	TGTCACGGACCTACGGCGCGCCATGTTTTGCAAAATTTGTGAGGTGT	TAGTGCACCACAATCCTGCAGGGAACAACTTCTCTTTCCTTGGCA	ATGTTTTGCAAAATTTGTGAGGTGTCGTCTTCAGAGCTTCATTTTGGAATCGTTTCTTGCAGATCGTGTGCGGCGTTTTTCCGAAGATATGTAAACTCTCCAAAGCAGCTGAAAAAATGCAATTGTGAAGCGGAGCGGGCTCCGTGCAGATATTGTAGGATGAAGATGTGTGTGAAAAATGGAATGATGATCACAAAAGTTCAACAAAAACGCGACCACAATCTCCCGCGAGCTGGCAGAAATTTTATTGAGACGGCACAAATTGCTCTTCGCAACAATGATCGAACTCTCAACGCACTGAGTAATTACCGAATTCTTGCCAAGGAAAGAGAAGTTGTTC	MFCKICEVSSSELHFGIVSCRSCAAFFRRYVNSPKQLKKCNCEAERAPCRYCRMKMCVKNGMMITKVQQKRDHNLPRAGRNFIETAQIALRNNDRTLNALSNYRILAKEREVVH	Z003_1625	Caenorhabditis_elegans	C12D5.8	zf-C4	zf-C4
176	13C07	pTH9460	TGTCACGGACCTACGGCGCGCCATGAACGTATTTTATGGTCCATGTCT	TAGTGCACCACAATCCTGCAGGCCAGATAAAATTGCAGCAGATCTTC	ATGAACGTATTTTATGGTCCATGTCTGGTTTGCAATGATGTCAAAAACACTAGCATGCACTTTGGAGTCAATTCTTGTGCTGCGTGTGCTGCATTTTTCCGAAGGACTACAGAAAATCAATATGCATGTAGTCGAAACAATAACTGTGCAACTTCCTATGAGCGAAAGATTCTATGCCGTGCGTGCCGTTACACCAATTGTCTGAAAGCAGGAATGAGCAGAGGAAACGAAGCATCAAGTCAAAGAAGTATTCCGTCAAGCGGATCTTCAAATTCTTCATCAACTTCAAGATCAAATTCTCCACAGACATACTCTGGATTCAGCAAAATTCTGAAGATTCATCATGAAGATCTGCTGCAATTTTATCTGG	MNVFYGPCLVCNDVKNTSMHFGVNSCAACAAFFRRTTENQYACSRNNNCATSYERKILCRACRYTNCLKAGMSRGNEASSQRSIPSSGSSNSSSTSRSNSPQTYSGFSKILKIHHEDLLQFYLE	Z003_1964	Caenorhabditis_elegans	C17A2.8	zf-C4	zf-C4
177	13C08	pTH9461	TGTCACGGACCTACGGCGCGCCATGCAAAAATCCTCATTAATAAGCCAT	TAGTGCACCACAATCCTGCAGGCAATAAGTGGTCGAATATCGATAAAAG	ATGCAAAAATCCTCATTAATAAGCCATCGATTCTCGTTCTGCAAAGTTTGTGGCGGGAAAGCCAATGGAAATCATTTTGGAATTCAAAGTTGTCGGGCGTGTGCTGCTTTTTTCAGAAGAGCAGCAAACTCAAAGTGGTCATCAATGAAATGCACAACTTTTGGTTGTGCGGACATGTTAGTCCCTTGCAAACCATGTCGACTGAAAAGGTGTCAGGAGCAAGGAATGAGCACAACTAATTTTCAATTCGACCGTGATGCCCTGAAACGACTTTTAGTTCCAAAATCTGTGGAGAAATTTGTAGGAAGGCCTGAATCTGTAATTTTTTGTGACATGACAGAAAGTACTTCGAAAACTTTTATCGATATTCGACCACTTATTG	MQKSSLISHRFSFCKVCGGKANGNHFGIQSCRACAAFFRRAANSKWSSMKCTTFGCADMLVPCKPCRLKRCQEQGMSTTNFQFDRDALKRLLVPKSVEKFVGRPESVIFCDMTESTSKTFIDIRPLIE	Z003_2008	Caenorhabditis_elegans	C17E7.1	zf-C4	zf-C4
178	13D04	pTH9462	TGTCACGGACCTACGGCGCGCCATGTACTCGTGCACCTCCC	TAGTGCACCACAATCCTGCAGGGCGGAGCCACAAAATTCTGG	ATGTACTCGTGCACCTCCCCATCCGGAATTAAAGTCTCCTTGAGCACACCAGAAATTTGGGAAGAGTTCTACCCGAAAACCGAAATGATTGTGACGAGAAACCGTGGAAGGGTGATTTTTCCGCATTTGGACTATATCATCAAGGGATTGGATCCAGGCAGTCTCTACTCGATTTATATTCATTTGGAACGTGTTGACGGGATTAAATACAAATTCGACGCAGGAGAATGGAAAGAATTCGCCAAAGGAGATCCGATTCTTCCAATCCAATACAAGGAGCATCCGCGTGGCAAGCGTACTGGAGCAGAATGGATGAGTGAGCCCGTCTCGTTTGCTCACATCAAAATCACGAATAACCCGGAAATCAAGGATCAGAAGGTCATTTTAGTGCAGAGTATG…	MYSCTSPSGIKVSLSTPEIWEEFYPKTEMIVTRNRGRVIFPHLDYIIKGLDPGSLYSIYIHLERVDGIKYKFDAGEWKEFAKGDPILPIQYKEHPRGKRTGAEWMSEPVSFAHIKITNNPEIKDQKVILVQSMHKHIPVVTVKQVRHYKTGYQEDFSGEQFRLEATEFMVVTAYQNEILKNLKVHHNKFASGFRSNGKRRLSSDSENSENSPPKRSKLVTPPTISPQIDLPQQTPYYFNQNFVAPQ	Z003_2313	Caenorhabditis_elegans	C24H11.3	T-box	T-box
179	14E04	pTH9463	TGTCACGGACCTACGGCGCGCCATGTCTCGAAGCCGTTCCG	TAGTGCACCACAATCCTGCAGGGAAGTTGGAGCATTTTGACTTGAATC	ATGTCTCGAAGCCGTTCCGCAGCTGCCAGCTCCTCTCAAAAGCCGGACGATATGGACCTAATGTCGCCGGACGGCTCGGCGAGCTCCCCATCGGCCCCAAACACGCCAGCGACGAATTCCGGCGGATTTAGCTCGGATAGAAAGAAGGCGACGCACTTGAGGTGTGAACGGCAGCGAAGAGAAGCTATAAATAGCGGATACAGTGATTTAAAGGATTTAATTCCTCAGACAACGACTTCGCTGGGATGTAAAACTACAAACGCCGCGATTTTATTCAGAGCCTGCGACTTCATGTCCCAACTGAAAACCGACATCTCCGACGCCGACAAGCAACTGGCCCAGCTCAACGCACAAGCGGCCGCACTGGAAATGATTGCCTCAGAGTACGAGCAGATGGCT…	MSRSRSAAASSSQKPDDMDLMSPDGSASSPSAPNTPATNSGGFSSDRKKATHLRCERQRREAINSGYSDLKDLIPQTTTSLGCKTTNAAILFRACDFMSQLKTDISDADKQLAQLNAQAAALEMIASEYEQMASSVPDAGQSTIQVKMLQLL	Z003_7858	Caenorhabditis_elegans	F40G9.11	HLH	HLH
180	15A12	pTH9464	TGTCACGGACCTACGGCGCGCCTCATCTTTAAATATTTCACCAACTACT	TAGTGCACCACAATCCTGCAGGAAGAATCTACACCATTCGTTTCCTG	TCATCTTTAAATATTTCACCAACTACTGGAAGTCCTAATTCTTCCCATTTCACCACGTTTACTCATTTTTCTACTCCATCTACATCTCCATCTACCTCTACTCAAAGTTCAACTCCACCGAGCAATTCTGATAATAAGAAGTCATTTCAATGCTCAAATTGTTCAGTAACTGAAACAATTCGTTGGAGGAATATTCGATCAAAGGAAGGAATTCAATGTAATGCTTGTTTTATTTATCAACGGAAATATAATGAGACTCGTCCAGTCACTGCCGTTAACAAATATCAAAAAAGAAAATTAAAGGTACAGGAAACGAATGGTGTAGATTCTT	SSLNISPTTGSPNSSHFTTFTHFSTPSTSPSTSTQSSTPPSNSDNKKSFQCSNCSVTETIRWRNIRSKEGIQCNACFIYQRKYNETRPVTAVNKYQKRKLKVQETNGVDSS	Z003_10661	Caenorhabditis_elegans	K04C2.6	GATA	GATA
181	16F01	pTH9465	TGTCACGGACCTACGGCGCGCCTTAAAATATATAAGAACTCGAAGAATG	TAGTGCACCACAATCCTGCAGGCAACAATATCATGCACTACACCAATC	TTAAAATATATAAGAACTCGAAGAATGGACAAACTCATTGATAATGTGGTGGTCAACGCGACGCAACGGGATTCTCCGGAACAAGAGGATTGTTCCACGAGCGGAGTCGCATTTGCAGATGGTCAGACGAATAGTGGAAAAATGGGAAGATTCAGTTGTGATCGGTGTTCTAGGACATTTAAATACCAATCCAAACTGGATGAACATCGTCGAACACATCTCGGAGTAAAACCATTTCAATGTCACTACTGTACCCGCCAATTCTCTCAACGTGGAGCTCTTAAAACACACATGAGATTACATACAGGAGAACGTCCATTTGTATGTCAATGGGAATGTGGAAAACAATTTGCTTCTTCATCTGCAAAAAGTCATCATGAAAAGACACATAGTGGAGAG…	LKYIRTRRMDKLIDNVVVNATQRDSPEQEDCSTSGVAFADGQTNSGKMGRFSCDRCSRTFKYQSKLDEHRRTHLGVKPFQCHYCTRQFSQRGALKTHMRLHTGERPFVCQWECGKQFASSSAKSHHEKTHSGERPYICNVCGKSFTKNSHVIRHLKNIHNRELAQQDAMLRGDDVQSTDESLNIGSARSQMSDIEPRGKEIGVVHDIVE	Z003_17753	Caenorhabditis_elegans	Y54E10BR.8	zf-C2H2	zf-C2H2
182	16F04	pTH9466	TGTCACGGACCTACGGCGCGCCATGTCTAACCAACTTGCCGTCT	TAGTGCACCACAATCCTGCAGGAATATCGAAAAGTTGAAGTGGAAAGGT	ATGTCTAACCAACTTGCCGTCTCCGATGTCCCAACTGCTGCATGGACCTCTCAACAGCCACGTTCTCCAAGAATGTTTGACCAGGAAAATGGCTTCTCACAGAACTTCCAGCCATTCATGCAGCAGAATAAGACGGTGAATCCATGCACAATTTCCGACGATGTTCGCGAAGAAATGATGAGATTGAGAAGAAGAGAAAATGCATTCAAAACTGCTCTTTGCAAGACGTTCCAGCTCACAAAAGCATGCTCATACGGGGAGCAATGCAAATTTGCTCACAGTGTCGAAGAGCTTCAGCTGAAACATCAGAACCTTGGAATCAATAACCCAAAATATAAAACTGTTCTTTGTGACAATTTCTCTACAACTGGACACTGCAAATATGGCACAAAATGTCAG…	MSNQLAVSDVPTAAWTSQQPRSPRMFDQENGFSQNFQPFMQQNKTVNPCTISDDVREEMMRLRRRENAFKTALCKTFQLTKACSYGEQCKFAHSVEELQLKHQNLGINNPKYKTVLCDNFSTTGHCKYGTKCQFIHRTVEPASLKIQNPLVPRFPSWFAPPSSLAREFLCLNHFEASTSSSTTQKLTSSNLSTSTFRYY	Z003_18055	Caenorhabditis_elegans	Y57G11C.25	zf-CCCH	zf-CCCH
183	16G09	pTH9467	TGTCACGGACCTACGGCGCGCCCAATTCGCGAGCTACTACCAG	TAGTGCACCACAATCCTGCAGGCAATGAAGGAGTGCACTTGGC	CAATTCGCGAGCTACTACCAGTACTCGCAAAGTTCACAGTTCTTCGAGCAAATGCTTCGTGAGAGCTCCGAGATACGGGCTCCGAGCAGTGGCGAGTCGAGGATACCGGTTGTCGGACGTTTAAAGATGCCCCCTCCTCCACCGAAACTCAAGCATTGCGAGGTGTGTGGCAACGCTGGTGCCACGTCACACTACGGTGGTACGGTATGTGGTGGATGCAAGATTTTCTTCTCACGGACAGTGCAAAGCAGAAAAGGATTCGTCTGCGAGCGGGGCGGTCAGTGCCCGATGAACGCTGGGAAGAGGGCAAAGTGCCGGGCGTGCAGGTTTCAGCTGTGTTTGAAGGCTCGTATGAGTCCGGAAGAAGTCGGACGTCTCCGAGACATGCGGATGGGTGAT…	QFASYYQYSQSSQFFEQMLRESSEIRAPSSGESRIPVVGRLKMPPPPPKLKHCEVCGNAGATSHYGGTVCGGCKIFFSRTVQSRKGFVCERGGQCPMNAGKRAKCRACRFQLCLKARMSPEEVGRLRDMRMGDYLPIVKKEGCVVGYFDESSQPSTSIEDCTSQVHSFID	Z003_19008	Caenorhabditis_elegans	Y94H6A.1	zf-C4	zf-C4
184	17A01	pTH9474	TGTCACGGACCTACGGCGCGCCATGATTACACAGATAGGCTCAACTTC	TAGTGCACCACAATCCTGCAGGTCTTTGTGAAAACTGGATGTTTCTGA	ATGATTACACAGATAGGCTCAACTTCTTCTGAACGCCGATGTGCAATATGCTCAAAACTTGGGAATTCATACAATTATGGGGTTCTATCATGCAACGCATGTAAAATGTTCTTTAGAAGAGCAACACTCGGAAAATCGGAGAAGTTCTGTATCAACAATGATAACTGTGATACAAGTAATCTTATTCTCACGTGCCGACAATGTCGATATAATAAATGTCTGAAAATGGGAATGAGAATTGTCACTAATCAATATGACAGTCTTGACGATATTATCAAAGTTCTTGCAAAATGGAATTTGGATCGTTCAAATAAATTAATGAATTTTCAATGTTTTGAAGATCCAACTTTGGATCAAGTTATTCAGAAACATCCAGTTTTCACAAAGA	MITQIGSTSSERRCAICSKLGNSYNYGVLSCNACKMFFRRATLGKSEKFCINNDNCDTSNLILTCRQCRYNKCLKMGMRIVTNQYDSLDDIIKVLAKWNLDRSNKLMNFQCFEDPTLDQVIQKHPVFTKK	Z003_19766	Caenorhabditis_elegans	ZK418.1	zf-C4	zf-C4
185	17A04	pTH9475	TGTCACGGACCTACGGCGCGCCATGGCATGTGCTTCGTTCTTC	TAGTGCACCACAATCCTGCAGGTGGAGCCAGGACTGATTGG	ATGGCATGTGCTTCGTTCTTCCGAAGAACCGTCTCATTCGGAATTCGCTTTTTGTGCAAAGAAGGAAATCGTTGTCCAATTTCGCAAGAAATTCGCTTCTTCTGCCGCTCATGCCGATATGACAAATGCATCAGTGTTGGAATGAATAGAGGACAAGTACAACAAAAACGGGACGATAATAATGTGCCGAAATATGTTTTGGACTCTAGAAGGCTAGGAATTCAGGAGATTGTTAGAGGATACACTACTTCAAGAACTGTCCCTTCTGAGCCTGCTGAACCAATCAGTCCTGGCTCCA	MACASFFRRTVSFGIRFLCKEGNRCPISQEIRFFCRSCRYDKCISVGMNRGQVQQKRDDNNVPKYVLDSRRLGIQEIVRGYTTSRTVPSEPAEPISPGST	Z003_19807	Caenorhabditis_elegans	ZK488.4	zf-C4	zf-C4
186	17A06	pTH9476	TGTCACGGACCTACGGCGCGCCGATCCAATCGAGTATGTTGCCAA	TAGTGCACCACAATCCTGCAGGCATCTTCCCCTCCTTCAGTAGTT	GATCCAATCGAGTATGTTGCCAAAATACGACACGAGGCCGAAAAATTTGGAGTTGTTAAAATTGTTCCGCCGGCGAATTTCAAACCACCGTTTGCTATCGACAAAGAAGCCTTTACATTTCGTCCCCGAACTCAAAAACTGAATGAAGTGGAGGCAATTGTCAAAGAGAAACACACATTTATTGACCGATTAATCAATTTCAATCGATATTCTGGTCTAACTTTTGAGTTTCCAGTGGATCGAGATGGAAATATTGTCGATTTGTATCGATTACATCGTATAGTTCAAAACTTTGGAGGATGTGAAGAAGTGAATGAAGATGAAAAATGGAGAGACGTTGCCCGCGAATACCTTCCAAAGGAGCAAATGGCTCGCGGTGTTCCGTCGGCTTTCATAAAT…	DPIEYVAKIRHEAEKFGVVKIVPPANFKPPFAIDKEAFTFRPRTQKLNEVEAIVKEKHTFIDRLINFNRYSGLTFEFPVDRDGNIVDLYRLHRIVQNFGGCEEVNEDEKWRDVAREYLPKEQMARGVPSAFINLIRSHYNLHIEPFNRNLKEKAMKNDDESDDEMEELKHKYQHHHGTMRTEIEVPNDKTTEGGEDE	Z003_19867	Caenorhabditis_elegans	ZK593.4	ARID	ARID
187	17A08	pTH9477	TGTCACGGACCTACGGCGCGCCATGGTGGCTACGAATCAGAAATG	TAGTGCACCACAATCCTGCAGGTTATCACTTCATCGATAGTTGGATCC	ATGGTGGCTACGAATCAGAAATGTGCCGTCTGTGAGCGCTTCACAACTGAGTTTAATTATGGAGTACCTTCCTGCAACGCGTGTAAAATTTTCTTCCGCCGACTAATCACGCGAACAACTCCCGTCAAAAAATGCTACCTGGGAGAAAACTGCTTCACGAAAACCCCAATAACCCAAAAATGTGTATTTTGCCGATTTCAAAAGTGCATTCAAGTGGGAATGACTCTCCCATCCTATCTTCACTTTGGCGAACAGACCAAAGAAAAGTGCCTAGATTCAACGATTCAGAATCTGATGCTCTTGGATGCTCATCGAGAGGATTTGATGGCAAACTACCACACGAGCTACCTGGATCCAACTATCGATGAAGTGATAA	MVATNQKCAVCERFTTEFNYGVPSCNACKIFFRRLITRTTPVKKCYLGENCFTKTPITQKCVFCRFQKCIQVGMTLPSYLHFGEQTKEKCLDSTIQNLMLLDAHREDLMANYHTSYLDPTIDEVIR	Z003_19929	Caenorhabditis_elegans	ZK6.4	zf-C4	zf-C4
188	17A09	pTH9478	TGTCACGGACCTACGGCGCGCCTCTCAACTACCCGGAATGCC	TAGTGCACCACAATCCTGCAGGTCAGAACTTTTACATCATCTTCATCTT	TCTCAACTACCCGGAATGCCTGGATGTTATTATCAACATGTTCCAGCTGCTGGAACTTCAGGAATTCAAGGATCATTAGATGCGGCGTTAATGGGAGCTGTTCCCTTGGCTATGAATAGTATGGCACATAGTCGGAGAGCAGCAAATCATAGAAAAGCAAGAACAATCTACGGTACAACACAAACTCAACAACTGGAAGATATGTTTAAAGGACAAATGTACGTAGTCGGAGCAGAACGAGAAAATCTTGCTCAACGCCTTGGCCTATCACCTTCTCAAGTTAGAATTTGGTTTCAAAACCGGAGAAGCAAACATCGTAGGAAACAACAAGAGGAGCAACAGAGCACGACGTTAGAAGAAAAATCTGAAGAAATTGGAAAAGATGAAGAGGAAGATGAT…	SQLPGMPGCYYQHVPAAGTSGIQGSLDAALMGAVPLAMNSMAHSRRAANHRKARTIYGTTQTQQLEDMFKGQMYVVGAERENLAQRLGLSPSQVRIWFQNRRSKHRRKQQEEQQSTTLEEKSEEIGKDEEEDDEEDEDDVKVLN	Z003_19945	Caenorhabditis_elegans	ZK652.5	Homeobox	Homeobox
189	17A11	pTH9479	TGTCACGGACCTACGGCGCGCCCGAAAACGGAAAAATACAGAAGAGATC	TAGTGCACCACAATCCTGCAGGCCAATACTGCTTGGTTATCTCCG	CGAAAACGGAAAAATACAGAAGAGATCAGAAATATTAAGAAAAAATTATTTATGGATTTAGGAATTGTTCGAACAAATTGTGGCATTGATAACGAGAAGCAGGATCGAGAGAAGGCGATGAAGCGGAAAGTGACAGAAACAATTGTAACAACCTACTGTGAGCTCTGTGAGCAGAATTTCTCGAGTTCTAAAATGTTGCTTCTTCATCGCGGAAAAGTTCACAATACTCCATATATCGAATGCCATCTATGCATGAAGCTCTTCTCTCAAACAATTCAATTTAATCGGCACATGAAAACTCATTACGGACCGAACGCTAAAATTTATGTTCAATGTGAGCTCTGTGATAGACAATTCAAGGACAAGCAATCGTTGAGAACCCACTGGGATGTATCACAT…	RKRKNTEEIRNIKKKLFMDLGIVRTNCGIDNEKQDREKAMKRKVTETIVTTYCELCEQNFSSSKMLLLHRGKVHNTPYIECHLCMKLFSQTIQFNRHMKTHYGPNAKIYVQCELCDRQFKDKQSLRTHWDVSHGSGDNQAVLA	Z003_20003	Caenorhabditis_elegans	ZK686.5	zf-C2H2	zf-C2H2
190	17B02	pTH9480	TGTCACGGACCTACGGCGCGCCAATCTTTTAACACCAACCAAGAAGATC	TAGTGCACCACAATCCTGCAGGCTTCAATGGTTGAATCGCTTTTAGAAT	AATCTTTTAACACCAACCAAGAAGATCAAACTAGAAGATGAATTGTGTGCCAGTCCAGTGTCAAGCAGGTCGAGTACGGTTAGCAGTTCACACTTTTCAAGTCCCCAACGGTCACCATCACGAAAGATGTCGGTTCCGATTCCAGAAGAAAAAAAGGACTCTGCATACTTCGAGCGTCGGCGCAAAAACAACGATGCAGCGAAACGTTCGAGAGACGCACGTCGTCAAAAAGAAGAACAAATCGCATCAAAAGCTCATGCTTTAGAACGGGAAAACATGCAACTACGTGGAAAGGTCTCAAGCTTAGAGCAAGAGGCCGCGCAGCTCAGATTTCTCCTCTTCTCCAAAATCTCACCAGCAAATTCTGAAGTGTCCTGCGAGTCAAACGATTCAACGGAA…	NLLTPTKKIKLEDELCASPVSSRSSTVSSSHFSSPQRSPSRKMSVPIPEEKKDSAYFERRRKNNDAAKRSRDARRQKEEQIASKAHALERENMQLRGKVSSLEQEAAQLRFLLFSKISPANSEVSCESNDSTETNDSNDSKSDSTIEV	Z003_20176	Caenorhabditis_elegans	ZK909.4	bZIP_1	bZIP_1
191	17A02	pTH9534	TGTCACGGACCTACGGCGCGCCATGCAAAAAGTTATGAATGATCCTGAA	TAGTGCACCACAATCCTGCAGGTGCAGGAAGTTGACAACACG	ATGCAAAAAGTTATGAATGATCCTGAAGATCTAGGAAATTGTAAGATATGCTTACAACGAGCAGATGGAATTCATTTTGCGGTTTCATCGTGCAGAGCATGTGCCGCGTTTTTTCGACGAACTGTCATTTTGAAGCTTAATTATACATGCAAGGAGAAAGGCAATTGTACAGTTGAGAAATCGCTCCGCAATTTGTGCCGTAGCTGTAGATACACGCGATGCATCAACGAAGGAATGAAAATAGAATTAGTACAGTTGCAGAGGGATTCTATTGGAAGGAAGAAAAGCGGGGCCAGCATTTCTATTGACCCTTTGTTCACTCCGAACGTAGCATCATCTCTCAGTGCTATTTTTAAAAATGAAAAAGAAGACGTGTTGTCAACTTCCTGCA	MQKVMNDPEDLGNCKICLQRADGIHFAVSSCRACAAFFRRTVILKLNYTCKEKGNCTVEKSLRNLCRSCRYTRCINEGMKIELVQLQRDSIGRKKSGASISIDPLFTPNVASSLSAIFKNEKEDVLSTSCT	Z003_19788	Caenorhabditis_elegans	ZK455.6	zf-C4	zf-C4
192	17A03	pTH9576	TGTCACGGACCTACGGCGCGCCATGCTAGTGAAATCTTTACAAACTTGC	TAGTGCACCACAATCCTGCAGGTGTTCAGATCTACAAATGTTTTCTGAT	ATGCTAGTGAAATCTTTACAAACTTGCAAAATTTGTGGAGCAGAAAATACACGTGGCAATCATTTTGGAGTTCAATGTTGCAGAGCATGTGCGGTATTTTTTAGGAGAAGAGCAGGCACCAAATATTTACGTTTGAAATGTCTTTCCGTACACTGTGGAGAGGCTGCTCGTTTTTGCAAGCCGTGCCGACTGAAACGATGTTACGAGGCCGGGATGAAAATTGAATATTTTCAACACAATCGGGACTCTATTAAGTCCTCGTCAATTGCCCAAATTCCCCGCTCCTTCGCCAATATTGTGGGCCGCCCGAGCTTGGTGATCTTCTGTGTTCCACAGGATTCCTATCAGAAAACATTTGTAGATCTGAACA	MLVKSLQTCKICGAENTRGNHFGVQCCRACAVFFRRRAGTKYLRLKCLSVHCGEAARFCKPCRLKRCYEAGMKIEYFQHNRDSIKSSSIAQIPRSFANIVGRPSLVIFCVPQDSYQKTFVDLNS	Z003_19806	Caenorhabditis_elegans	ZK488.2	zf-C4	zf-C4
193	17A05	pTH9601	TGTCACGGACCTACGGCGCGCCCATACGCGGAAAGATGTTCGAG	TAGTGCACCACAATCCTGCAGGGAATATGAAGACGTCGATGTTCGAT	CATACGCGGAAAGATGTTCGAGACGACGAAGGTGAAAAAGTTAAACGAGAAGGATATGAAGTACAATCAGGAGTATTGACTGTAAATGAGAATCACCCATCCAACTTCAAACCGAAGAAATTGCCAGGAATCGCTAACGATGTCGAATCTTATCCATGCCGATTTTGTGAGGAGAAAATTTTTTTGACTGCATCAGGACTTGAAAAGCATGGAAGAGAGTGTCACCTGCAGAATTTAGACGATATCATGCTAGATATTAATACAATTTGTGGAGAATGGAAGAAAAGAGAGTTCGAACGGCTCCGATCTCGCGATCGACTAACAATGGATAAAATGAGACACGAAGCAAGAGCACATCAACTTGTAAAAGCTGTTCTTGCTGGAAATCAGCCGACTGTA…	HTRKDVRDDEGEKVKREGYEVQSGVLTVNENHPSNFKPKKLPGIANDVESYPCRFCEEKIFLTASGLEKHGRECHLQNLDDIMLDINTICGEWKKREFERLRSRDRLTMDKMRHEARAHQLVKAVLAGNQPTVGGEQYEACTICNMLVNIAHPTAMESHQRAHKKNDELRLQLIDRLGAHEVQNLTCELCSLVFPDDGKLRAHVTSHHTRRKKYICKFCGHISHSMSELNLHKNDVHNYTAWANVPEYLKSRRTFYQYDEEQKRLRRRTNFEMADEMSIRLPILGEISDGDTAGRVTCPECGLKLNRPRLLFKHMERVHMKSSFSCMVETGGLPTFELEVSNGEIFWTCCDSKFDNRPEFIEHRRLHIP	Z003_19849	Caenorhabditis_elegans	ZK546.5	zf-C2H2	zf-C2H2
194	13B12	pTH9708	TGTCACGGACCTACGGCGCGCCTCCCCACATAATCACACAGTTCT	TAGTGCACCACAATCCTGCAGGGTGATGGATAATAGGGTTGTAGATCAA	TCCCCACATAATCACACAGTTCTACAAAATTTGTGGCTTGATGCACATTATAAAGAGGCTGCGAAAACAAAGGATCGGGAGCTAGGAGCGGTTTGCAAATACCGGATCCGAAAGAAGAACCCATTTCCAAACACAATTTGGGATGGAGAAGAGACAAATTATTGCTTTAAGTCGAAATCTCGAAATGTTCTTCGGGATGCTTACAAGAAATGCCAGTACCCATCAGTAGAAGATAAAAGACGATTAGCTCAACAAACTGAATTATCAATTATTCAAGTGTCCAACTGGTTCAAAAACAAGAGGCAACGTGAGAGGGCAGCTGGTCAACTCGATAGAAGCTCCGCCAGATCCAACGACAGTGACGATGGATCATCTGGCTGTGAATCAAAACCTCCGATG…	SPHNHTVLQNLWLDAHYKEAAKTKDRELGAVCKYRIRKKNPFPNTIWDGEETNYCFKSKSRNVLRDAYKKCQYPSVEDKRRLAQQTELSIIQVSNWFKNKRQRERAAGQLDRSSARSNDSDDGSSGCESKPPMNIDSPAPPPLPTSFDLQPYYPSP	Z003_1572	Caenorhabditis_elegans	C10G8.6	Homeobox	Homeobox
195	13D02	pTH9709	TGTCACGGACCTACGGCGCGCCCCACAAGGATTAGCTGGTATTCC	TAGTGCACCACAATCCTGCAGGTGAACGTAAGATTGAGAGCGG	CCACAAGGATTAGCTGGTATTCCACTGATGTTCCAGTCTCCTCTCCACCAACAATTTGCTGGAATGCAAGACTTTGAGCCATTGTCAGCTTTGTCCACACCAAACAAGGGAAGTGGAGTCAAACGTCAATACTCTTCCAACAACAAAAACTTCTGTGATATTTGCAACAAGGAAGTTTGCAACAAGTACTTCCTCCGTACACATATGCTCAAAATGCACGGAATTGTGATTGATGAGAACAAGACAGTTATTGCAAATATCGACACAAGCATCAAGGAGCGAGAAGGAGAGCTTACTTTCCGATGTGACACTTGCCGAACTATGTTCAAAACTCGTAATCAGCTCAGGCAACATCGTCAGGATGTGCATGGAGTCTTGCCATTGTCAACTCCACGTAAC…	PQGLAGIPLMFQSPLHQQFAGMQDFEPLSALSTPNKGSGVKRQYSSNNKNFCDICNKEVCNKYFLRTHMLKMHGIVIDENKTVIANIDTSIKEREGELTFRCDTCRTMFKTRNQLRQHRQDVHGVLPLSTPRNNPNKSSVPTTPNGANNNSGPNSASMSEEKCALCDKRVSPSMMMLHMAQDHFGAAAANGDLNQMMAILGQRNQSTEEKMSSNLLECTDCSYKTRDPKNLDLHMERHIKMSEAKGRGDEDEDVALQLTTEAALQMVVQNQNQYDGDSTAAALNLTFK	Z003_2125	Caenorhabditis_elegans	C18D1.1	zf-C2H2	zf-C2H2
196	14E02	pTH9710	TGTCACGGACCTACGGCGCGCCTCGTCGGATGATCCACAAGTT	TAGTGCACCACAATCCTGCAGGACCACAAAAAAGTGAGATGTTGATG	TCGTCGGATGATCCACAAGTTTTCACATTCGTCTGCCTATGGGGTCAATGTGTGTCTAGCTCGTCGAGCAAGGACGAGTTCGTTGATCATTTATTCGGCCACGTGTCAGTAATCGAGGAAGGAGTTCAAAATGGGAACCATATGAATACTGTTCAGTGCAAAGTTCGCGGGTGCAACAAGCATCTCGATTCGATATTCCAACTCCACCGACACGTCTCAATGCACGTATTCCAAGCAGATTGTCAGCAAAAAGGATCAGAAGCACTGATTGAAAAGGAAGATTATATTGGAATAGAGAGTTGTGGTTTTGAGCCATGTACAAATATTAATTATGAAGGAATGCTGCTGAATTGTCAATGGGAGGATTGTGGAATGCCGTTTAACTCATTAACCGAACTG…	SSDDPQVFTFVCLWGQCVSSSSSKDEFVDHLFGHVSVIEEGVQNGNHMNTVQCKVRGCNKHLDSIFQLHRHVSMHVFQADCQQKGSEALIEKEDYIGIESCGFEPCTNINYEGMLLNCQWEDCGMPFNSLTELFDHVGHHIDGVGDVDRIQQNFSNGDKKVVFPCKWTACTQVADSKANLRRHARHHSGEKVLACPFCARFFSRRDKLYDHCLRRTILMKNPEMEDPYLCKLCQKRFGTEKALCMHVTRHLVSLTCPLCSLGLGCRAELHRHLMTKHSRRSKDFKCDTCSKLFFTESELNRHAVYHSDVMYSCKHCPEKFKWKKQLMKHMKEHDENFNPSPYTCHLCDRTYTTGFALGRHLTRQHRLQIPYGFSRFTYKKCADGLMRLQTKKLFRGESG…	Z003_7715	Caenorhabditis_elegans	F39B2.1	zf-C2H2	zf-C2H2
197	15B11	pTH9711	TGTCACGGACCTACGGCGCGCCGCATCATTGTCACCGTCCTC	TAGTGCACCACAATCCTGCAGGGGTGAAGGGCAGTAACAACTG	GCATCATTGTCACCGTCCTCCAGACTTTCGGTGGTTTGTTCGGCATCCGCCGAGTTCTCATCGAGCTCGTCGGATTCGTCGAACTTTTCAGAAGGATCTCCCCCGGAATCTAGAAGAAATTCCGTAAACGAAAGTGTAATAAAAGATGAACATTACTGGGAAAGGCGACGGAGAAATAACGATGCATCAAGAAGAAGTCGAGAAAAGCGAAGGCAAAACGATCTAGCAATGGAAGAAAAAATAATGTTACTTTCCGCCGAAAACGAACGGTTAAAATCTCAGTTAGGAACGACACCAATTCCACAACCATCAGTAACAGAGCCTCCAACATCTCTGATTATTCCCCAAGTTGCAAAGAATCTTTTCCCAGCGGGTCCAATAGCATCTTTGCAAGCGAGT…	ASLSPSSRLSVVCSASAEFSSSSSDSSNFSEGSPPESRRNSVNESVIKDEHYWERRRRNNDASRRSREKRRQNDLAMEEKIMLLSAENERLKSQLGTTPIPQPSVTEPPTSLIIPQVAKNLFPAGPIASLQASSMLTVPLLQAASHIPSMLQLCQLQPTTIQSPVYASTQQPASTSASSLFSSSSSSAFHPFRPSESAQQSFPSSSVIVKIERRSPDSSTDVNMPQPQLQPGSSVIQQIGQPAPSGTPQPVIQAVQQGPSLLSALLSQRRPSPTVPQSRTEHISGLNSPPRHTGNKSDCESVSSSASFSPSHSSEDHSNYSNKSPQYVDRRRRNNEAAKRCRANRRAVFEYRSRRVQLLEGENEDLRTQIETLKAEIAHFKSVLAQRASVVTALHP	Z003_11081	Caenorhabditis_elegans	K08F8.2	bZIP_1	bZIP_1
198	15E11	pTH9712	TGTCACGGACCTACGGCGCGCCATGTTGGTGGCTCGCGAAC	TAGTGCACCACAATCCTGCAGGGAGTCGGAGTCATTTGGTCATAG	ATGTTGGTGGCTCGCGAACGAAAATATTGTAGTGTGTGCCATCAGTTAGGAGATGGTTATCACTTTGGGGCTATCGCTTGCAAAGCATGTGCCGCGTTCTTCCGTCGTACGACTTCCATGAACTTGGCTCCAAAATTCGTATGCCGGAAAAAGAACGAATGTGTGATAAAAATGAGCAGCCGGGATAGCTGTAAATCATGTAGATATGCGAAATGTCTTCACGTCGGAATGAATCCGGAAGTTGTTCAAGCAATCCAACAAGCCGCAAAACAAGCAAATTCACCTGGAATCGAAAGCCTTCCATCCTGTTCATCTTCCCCTGCATCATGCAACAGCCCGATTCTCAGTCTGGAACTCGGTGACTATGACCAAATGACTCCGACTC	MLVARERKYCSVCHQLGDGYHFGAIACKACAAFFRRTTSMNLAPKFVCRKKNECVIKMSSRDSCKSCRYAKCLHVGMNPEVVQAIQQAAKQANSPGIESLPSCSSSPASCNSPILSLELGDYDQMTPTL	Z003_13118	Caenorhabditis_elegans	T05B4.2	zf-C4	zf-C4
199	16D03	pTH9713	TGTCACGGACCTACGGCGCGCCATGCCCCAACACTGTCAAGT	TAGTGCACCACAATCCTGCAGGAATTGTCTCGATGAATCACCCG	ATGCCCCAACACTGTCAAGTATGTGGTGTTCCGTCGGCTCGAATTCATTTTGGCGGAGTCGTTTGCAGCGCATGTTCGGCATTTTTTCGTCGAACCGTTGTTCGTGGCCACGAGTACAGGTGTAAGCAGATGGAAAATTGTCTGATTGTTTCGACAATTCGAAACATGTGCAAAAAGTGTCGATACACAAAATGCATATTAGTCGGAATGAAACGCGAGAGTGTTCAAAAATTTCGAGATGTCTACGGAAAACGAGAGATCACCGTGAAAAACTCCACAAAGACTGCTTCTCCAATTTTAAAAGATTTTGTGAAAAACTACGAGCATCTTGAAAATGTTCGACGGGTGATTCATCGAGACAATT	MPQHCQVCGVPSARIHFGGVVCSACSAFFRRTVVRGHEYRCKQMENCLIVSTIRNMCKKCRYTKCILVGMKRESVQKFRDVYGKREITVKNSTKTASPILKDFVKNYEHLENVRRVIHRDNS	Z003_16850	Caenorhabditis_elegans	Y41D4B.8	zf-C4	zf-C4
200	16E02	pTH9714	TGTCACGGACCTACGGCGCGCCATGCAGACAATGGATCAAGGAC	TAGTGCACCACAATCCTGCAGGTGTCAGCTGGCGGAAAACA	ATGCAGACAATGGATCAAGGACAATTGCAAAAGTTATTCGCCGCGGCGGCGGCAGTGTCGGCGGCTCCACAGCAAAATCCAATGATGCTCTTCTCACCGATGACGTCACAGGCTACGACACCCACTGTATGGCCGATCAAGCCGACGGTCAATACGTTGACACCGCCACCCGTACAGAGCATTGACGCAAATTTGGCGGCATGTATTCTTATTCAGCAAGCTCTGCAGAATCAGCAAGCCCTGGCCGCAGCGTCTTCACCAATTCTTCCATCACCCACCCCAACCTTCCCCTCCCTTCCATTATTCTCACCTACCGTACCAACAAGCCTCCCAACTCCAACACTGACCCCAACCATAATATCATCAGTATCACCTCAATGCTCAACATCTCCCGGAGTC…	MQTMDQGQLQKLFAAAAAVSAAPQQNPMMLFSPMTSQATTPTVWPIKPTVNTLTPPPVQSIDANLAACILIQQALQNQQALAAASSPILPSPTPTFPSLPLFSPTVPTSLPTPTLTPTIISSVSPQCSTSPGVFNTLNTLLQMESLSKCSTPPINISHSPTTTPLEKMRKLSSVSMPAEFVSVLQTPSVSASGSGSGSLPASSPSTSSKKGEEDEEDEEEEFVDIESVDVAVDGKEKRKAHVEFYRRMKYMRQHYRDKALQCGICRKKVENHENAMAVHVAEHADAGCYQCRLCGWQAIDKYKIYTHMREEHPRKVDMFVDKRDMPKMCLVLGQCFPKTSSRPKKDSNLNADTYLTEILRESAREKVCQLCKGHVRRDKTAMIRHVQTNHTIKCKTCKT…	Z003_17308	Caenorhabditis_elegans	Y48C3A.4	zf-C2H2	zf-C2H2
201	16E05	pTH9715	TGTCACGGACCTACGGCGCGCCATGGCTCAAACAAAGCCGATT	TAGTGCACCACAATCCTGCAGGAAATAATAGTTGGTGGTGGCTGAG	ATGGCTCAAACAAAGCCGATTGCCGAGCAAATGGCTGCACTCAACAACTCAGATGACACGTCGTTCGCTGCCGATCGATCGAACAGTCTTCTGAATGCGACGTGCCCGGCGAGAATTCAAAATTCAGTAGATCAACGGAAAATCAATCGATCATTCAATGATTCGCTGTCGTCCGGATATAGTGGAAAATGGCTTCGTCCAAAGCGTGAAGCGCTCAAGATCACTCCATTGGCTCAGATTGACGAGGCGCCGGCAACTAAAAGACATAGCTCGGCGAAGGATAAGCACACAGAATACAAAACGCGACTTTGTGATGCGTTCCGCCGTGAAGGATACTGCCCGTACAACGACAATTGCACATATGCTCACGGACAAGATGAGCTGAGAGTTCCGAGACGC…	MAQTKPIAEQMAALNNSDDTSFAADRSNSLLNATCPARIQNSVDQRKINRSFNDSLSSGYSGKWLRPKREALKITPLAQIDEAPATKRHSSAKDKHTEYKTRLCDAFRREGYCPYNDNCTYAHGQDELRVPRRRQEYYSRDPPRERRDSRSRRDDVDTTINRSSSSASKHHDENRRPSNNHGSSNRRQICHNFERGNCRYGPRCRFIHVEQMQHFNANATVYAPPSSDCPPPIAYYHHHPQHQQQFLPFPMPYFLAPPPQAQQGAPFPVQYIPQQHDLMNSQPMYAPMAPTYYYQPINSNGMPMMDVTIDPNATGGAFEVFPDGFFSQPPPTIIS	Z003_17410	Caenorhabditis_elegans	Y49E10.14	zf-CCCH	zf-CCCH
202	16E10	pTH9716	TGTCACGGACCTACGGCGCGCCATGTGCGCATATCAAGGAAATCC	TAGTGCACCACAATCCTGCAGGAGGAGTTAGTATGATATGATTTGTCTG	ATGTGCGCATATCAAGGAAATCCGTCGATTTCCCGATTGTTGCAAATGCAACAGGATCAGCAGAAAATGATTGAACAAACTAAAAATATGTCAATCGATGAGCAAAATGCTCGTACCGTCCTAATAAATCTGTGGCATGTTCTAGAAAGTCGAATGTTTCAATCAATTGCCTATTGGGATAATGAAAGCTTCCATATTTCTGATCCATACTTGTTCGAGAGACATGTTCTGAAATTATTCAAGACTAACGATATTAATGACATTTTTAAAGTGCTGTTTATGTGCGGCTTCGGCAAGATTACCCACGTCTCTCACGGCTGCCATGTTCACCTGGAGTTTAGCCATCCGTTTTTCAAAAAAGGACGTTTTGATCTACTATCACAGATTAAGATTCAGGTA…	MCAYQGNPSISRLLQMQQDQQKMIEQTKNMSIDEQNARTVLINLWHVLESRMFQSIAYWDNESFHISDPYLFERHVLKLFKTNDINDIFKVLFMCGFGKITHVSHGCHVHLEFSHPFFKKGRFDLLSQIKIQVGDSDEYEKKYPHGLHSGLLYSASSASSDKSYHTNSY	Z003_17632	Caenorhabditis_elegans	Y53C10A.3	HSF_DNA-bind	HSF_DNA-bind
203	16F08	pTH9717	TGTCACGGACCTACGGCGCGCCATGCCCACAAACCCGAATTC	TAGTGCACCACAATCCTGCAGGTTTCAGCATCCGATTCTTGAGG	ATGCCCACAAACCCGAATTCTTGTGAGGTGTGCTCATCGTCCTCGAATAGTTCCTGCAATCATTTTGGAGCCAGAACTTGCAAGGCTTGTGCTGCCTTCTTCCGTCGCACCGTATCTATGAAGCTCGACTATCAGTGTATTGACCAACCGGATGCCTGTCGTGTTCATTGTGATTCTCGCGTGATTTGCCGATTTTGCCGGCTCAAAAAGTGCCATGATATTGGTATGAAGCCATTGTTGGTGAAATCAAAAAACGAGCGGAAAAACTACATCCGGATTTCCAAAGGATTAATTCGCAAAAGATCAGTACTCGGCGACAATGTCAAAGAAAATTCCGAAGAAATTCAAAATGATGATGATCCTCAAGAATCGGATGCTGAAA	MPTNPNSCEVCSSSSNSSCNHFGARTCKACAAFFRRTVSMKLDYQCIDQPDACRVHCDSRVICRFCRLKKCHDIGMKPLLVKSKNERKNYIRISKGLIRKRSVLGDNVKENSEEIQNDDDPQESDAEM	Z003_18173	Caenorhabditis_elegans	Y5H2B.2	zf-C4	zf-C4
204	13D03	pTH9877	TGTCACGGACCTACGGCGCGCCGATTCCAGAATTATTTTTGATGAAAGC	TAGTGCACCACAATCCTGCAGGCTTTTTTTGCTTGACGCCGC	GATTCCAGAATTATTTTTGATGAAAGCTTGACGAAAAATGAAAATGAGCAAAAATCCTTTGTGGAGCAAGATAGCAGTTACGAATCATCTGGAAACCGATTTGGTTCACAGAAGGGAAAGAAAATTGCAAAAGTAATTCGTGATGCGTGCTGCTCACACTGCTCAACAACTACAACCACACTTTGGCGTAAAAATGATGAAGGGAATCTTGAGTGCAATGCTTGCAACTTGTATTACCGTCACAACAAAGTGAAACGCCCGTTATCCCTCTGCAAGCAGAAGCCAACTACTCGAAAGCGGCGTCAAGCAAAAAAAG	DSRIIFDESLTKNENEQKSFVEQDSSYESSGNRFGSQKGKKIAKVIRDACCSHCSTTTTTLWRKNDEGNLECNACNLYYRHNKVKRPLSLCKQKPTTRKRRQAKKE	Z003_2174	Caenorhabditis_elegans	C18G1.2	GATA	GATA
205	13D07	pTH9878	TGTCACGGACCTACGGCGCGCCAGAGTTGTGAAAGTTGAAAGAGTTCC	TAGTGCACCACAATCCTGCAGGAAATTCGAGTCTCGACAGGAAGT	AGAGTTGTGAAAGTTGAAAGAGTTCCAATGATGCGAGGAGATTTAAGGACAAGCGGTGCCACGTCATCAAGTGGTCCCGCCACGTCATATATCATCAGGCCCAGTGACAAGCAACCCACAGTTTCTAGTGGTGGATCACAGAATGGAGATTCAGTTTGTGCTGTTTGTGGTGACGGAATTGCAAAATTACATTATGGAGTACTTGCATGTTATGGATGTAAAGGATTCTTTAGAAGAACACTGACTGGAAAATATCGATATGCATGCAGATTCTCAAATAATTGTATTGTTGATAAATTCCAGCGAAATAGTTGCCGATACTGCAGATTTCAACGTTGTATTCAAGCAGGAATGGATCCAAAAGCAGTCAGGCCGGATAGGGATCAGACAGGAAAACAG…	RVVKVERVPMMRGDLRTSGATSSSGPATSYIIRPSDKQPTVSSGGSQNGDSVCAVCGDGIAKLHYGVLACYGCKGFFRRTLTGKYRYACRFSNNCIVDKFQRNSCRYCRFQRCIQAGMDPKAVRPDRDQTGKQKVPRIKKKQIDEELLNHMMRLQGDDWSRKLPVETRIL	Z003_2437	Caenorhabditis_elegans	C26B2.3	zf-C4	zf-C4
206	13E04	pTH9879	TGTCACGGACCTACGGCGCGCCAAGATGCACGAAATGGCTATTCG	TAGTGCACCACAATCCTGCAGGTTTTTTCTTTACTTTCGTATTGATGCA	AAGATGCACGAAATGGCTATTCGACAACATCTAATCACTGATCAGAATATAACTGCCAATGGAGACTTGGTGTTGTCAGCAGAAGAGCGACGAACTCTTGTTCAAGAAGGCTATTCAATTCCACAGAAATACCCACTGACAAAAAGTGAAGAGGAATCCTTGAAGATTGTTCGTCGTAAAATCAAGAACAAGCTTTCTGCACAAGAATCTCGCCGAAAAAGAAAGGAGTACATTGATGCCCTTGAGGGTCGATTGCACTGTTTTAGTGAGGAGAACAAATCCCTTAAAAAGCAAGTTCACCAATTGGAAGCATCAAATCGTGATCTTCAGCAGAAGCTGCATCAATACGAAAGTAAAGAAAAAA	KMHEMAIRQHLITDQNITANGDLVLSAEERRTLVQEGYSIPQKYPLTKSEEESLKIVRRKIKNKLSAQESRRKRKEYIDALEGRLHCFSEENKSLKKQVHQLEASNRDLQQKLHQYESKEKM	Z003_2546	Caenorhabditis_elegans	C27D6.4	bZIP_1	bZIP_1
207	14H08	pTH9880	TGTCACGGACCTACGGCGCGCCGGAAGTCTCGATATGATGAATTGCTA	TAGTGCACCACAATCCTGCAGGAGAAATGTTGTGATGGAATGTTCTGT	GGAAGTCTCGATATGATGAATTGCTACTCACAACAGTATCCCCAAATTGGACAAGACTATCAACAACAGGAAATCGAAAATATTCCACCAGTCTCTACAAATCGCAAAATTGTGAACAAAAAGCCCTCAACGTTCCACACGAACTCTGTCTGCTCCAATCCAAATTGTAGAACTCGTGAGACAACTCTATGGAGAAGAACTGATTCAGGAGCTATTGAGTGCAACGGTTGCTCCCTGTACTTCCGAAAAAATGGGATTCAAAGACCAGCCGAGTTGTGCCGTAAAACAATAATGAAAAGAAACCGACGCCCACGTGCCGAAGTACAATCTCCAACACCAGAAGACTCGAAACTATGTCATAATACTACTCCACTACAGAACATTCCATCACAACATTTCT	GSLDMMNCYSQQYPQIGQDYQQQEIENIPPVSTNRKIVNKKPSTFHTNSVCSNPNCRTRETTLWRRTDSGAIECNGCSLYFRKNGIQRPAELCRKTIMKRNRRPRAEVQSPTPEDSKLCHNTTPLQNIPSQHFS	Z003_9786	Caenorhabditis_elegans	F58E10.2	GATA	GATA
208	15E03	pTH9881	TGTCACGGACCTACGGCGCGCCACATCGACTTCATTGACGTCC	TAGTGCACCACAATCCTGCAGGTCTCTACAATAACCTTCATATTAACAG	ACATCGACTTCATTGACGTCCGGGCTAGACAAAGAACCTCAAACATCAACTGACAACACTACAACAAATGGAGAAATATTGAACCCGTCAAGTTCGGAACCCACGTGCACTTCTGTACTTTCTGACCAAAAATCGCTAGATCTTCCAAAAAGAAGAGCTTGGTCTTTTGATGAAGTTTGCGCTTTTCATGATGGAATCAAGCTTCACGGGAAAGATTTTGACAGTGTTGTAAAGTTCATGGCGAAGCGAAAAATGGAAAAGACCAAAGATCACGTGAAGACGTTCTTCTTCAATTCGGCAAAAGCATATAAATCATTATTGGCAATGACAGATGATGATTTTGCAAATATTCCACGAGATGCTCGAGAACTGTTTCTTCTCATCAACGCGTGCGAATAT…	TSTSLTSGLDKEPQTSTDNTTTNGEILNPSSSEPTCTSVLSDQKSLDLPKRRAWSFDEVCAFHDGIKLHGKDFDSVVKFMAKRKMEKTKDHVKTFFFNSAKAYKSLLAMTDDDFANIPRDARELFLLINACEYKRKTVNMKVIVEK	Z003_12650	Caenorhabditis_elegans	R151.8	Myb_DNA-binding	Myb_DNA-binding
209	15H10	pTH9882	TGTCACGGACCTACGGCGCGCCATGACGTATTTCACTCACGAAATGA	TAGTGCACCACAATCCTGCAGGCGGTTGAGGACATCGAATACATC	ATGACGTATTTCACTCACGAAATGAACCAAATTATGGGGCTTCATCATCCGGAAATGGCGATGCCCAAGTTCAAAATGGTCGCCCTGGTCAGTGCTGCGATGGAAGAAGCGGATGACGTGTTTCCGGAGATTGAAGTAGTTGTCAAGTGGATCACCGACTTGTTCCCGTATTACAAAGTGTTTCACGATATGTACAAATGGGAGTTTGTTAATCATGTGGCCTGGGTTCTGGACACCGAACTGTGCTTTCGTCGAGAAAGAGACGTGAGATCTGGACTATGGGCTTATGAAGACGGCAACAAGGATATTCTGGATGTTGAGGAGGAGTTTCGAAAGGATATAGACGAGTTGAAGCAATATGTGGAGCATCAGGTGGAAATGACGGATCTTGCTGGACGG…	MTYFTHEMNQIMGLHHPEMAMPKFKMVALVSAAMEEADDVFPEIEVVVKWITDLFPYYKVFHDMYKWEFVNHVAWVLDTELCFRRERDVRSGLWAYEDGNKDILDVEEEFRKDIDELKQYVEHQVEMTDLAGRMYSMSSTG	Z003_14812	Caenorhabditis_elegans	T27A8.2	Fork_head	Fork_head
210	16G04	pTH9884	TGTCACGGACCTACGGCGCGCCATGTTTTCACAAGCTCAATTCAATGT	TAGTGCACCACAATCCTGCAGGAATTCGTGGACTCATTATAATTTTCTG	ATGTTTTCACAAGCTCAATTCAATGTTACAATGGCTGAAGAAGACCGATGGAAACAATGGTATCCAAATATGGAAATGATTGTGAATAATAAAGGGCCGAAACTAATTTTTCCCGAACTCAACTTCAATATTACTGGATTGGAAGAGAAATCGAGATATGTTGTACTTCTTTCAATTGAAAAATATGACAATATCAGATATGGATACCGAAATGGAAAATGGGGACCTTCAAAAGTCCGTCATGCAACGAAAAAAGAACAAGAAATCAAATATTTCTTACATCCAGATGGAACAAAACTTGGAAAGGAATTGATGAAGGAAACTATTAAATTTGATACAGTCAGGATTACGAATCACAAAAAATTCATGGACAAGGATAATGTGTTTTTCGTGGAAACA…	MFSQAQFNVTMAEEDRWKQWYPNMEMIVNNKGPKLIFPELNFNITGLEEKSRYVVLLSIEKYDNIRYGYRNGKWGPSKVRHATKKEQEIKYFLHPDGTKLGKELMKETIKFDTVRITNHKKFMDKDNVFFVETMHKYVPVLTVKNITNVESANHSMRMEVAQFFPVTVYNQESIGNWKSKFHKNSTYGNRLDGGNKRKNTDSSEERTSKRSKNETEIAVSDILQVASQSENYNESTNS	Z003_18744	Caenorhabditis_elegans	Y73F8A.16	T-box	T-box
211	16H05	pTH9885	TGTCACGGACCTACGGCGCGCCTCGTTGATGAACACCCCCA	TAGTGCACCACAATCCTGCAGGATGTTCCGTCACTGTCATCATTG	TCGTTGATGAACACCCCCACACAACCGACGGCTTCCTTGACGCCTAAAAAAGCTGAGAATCGGCCTCCAGTAGTGTCACAAACGTTGAAAGCTTCTAAGCGACGATTATTTGATGATACATCAAGAATTGAGGCGGCGAGCATGAGCGGTGATGATCGGATTGATATGAATGAGCTGGAAGCATTTGCACAGACGTTCAAAAAACAGAGGATAAAGTTCGGTTTCACACAAGGCGATGTTGGTGTTGCGCTGGGGAAACGATATGGCACCGACTTTTCACAAACAACCATTTCACGTTTCGAAGCGCTGAACCTGTCATTCAAAAACATGTGCAAACTGAGGCCTTTGTTGAAGGAATGGCTAGCAGATGTGGAGATGGCAATCGAAGGTGGTGCAACT…	SLMNTPTQPTASLTPKKAENRPPVVSQTLKASKRRLFDDTSRIEAASMSGDDRIDMNELEAFAQTFKKQRIKFGFTQGDVGVALGKRYGTDFSQTTISRFEALNLSFKNMCKLRPLLKEWLADVEMAIEGGATVTDLIDKKTIHNGNHHTIHHVDIHETSISNSISSVTASSLLSREQHVKRRRKRTNLDMNQRNALDTFFALNPRPDHDKMTDIANSLELDRDVVRVWFCNRRQKMRRVDEPIEGEMVTPSVSPVFPHFSSMSALEQIQEAARLASCQASNDDSDGTS	Z003_19377	Caenorhabditis_elegans	ZC64.3	Pou,Homeobox	Pou,Homeobox
212	16H06	pTH9886	TGTCACGGACCTACGGCGCGCCATGACAAGTTCTGAGCCTTCG	TAGTGCACCACAATCCTGCAGGAACTTCCAGTCTGGGCTTGAT	ATGACAAGTTCTGAGCCTTCGGAGACTCCTCAAAAGCGCTGCCTGGTCTGCGGGGGGACACCGAACGGGAGTCGATATGGAGCTCTGGCCTGTCTCGGGTGTATTGTGTTTTTTCGAAGAGCGATTTCTAATGCGAATGTTAAAAATTGTGATAACAATTCAAATTGTAAAATTGGTTTCGAAACAAAAAACTGCTGCCGAAGTTGTAGACTCCAGAAGTGCCTTCAAGTTGGGATGAATCCGAAAGCTATCCAGCACCGCGATCTCATTGGCCCACGAAAACCTGTGAAAGTTGAGCCGGAAACTCAAAAGTCGAAACTTCACCACCTTTTAGAACTGCAAAGAAAACAGTGGTCTCGAAACCAAAAACATCAAGCCCAGACTGGAAGTT	MTSSEPSETPQKRCLVCGGTPNGSRYGALACLGCIVFFRRAISNANVKNCDNNSNCKIGFETKNCCRSCRLQKCLQVGMNPKAIQHRDLIGPRKPVKVEPETQKSKLHHLLELQRKQWSRNQKHQAQTGSF	Z003_19415	Caenorhabditis_elegans	ZK1037.5	zf-C4	zf-C4
213	15E07	pTH9895	TGTCACGGACCTACGGCGCGCCATGGAGACTAATCTTTCTGAAGAAAAA	TAGTGCACCACAATCCTGCAGGAGTAAATACTAATAGTTTCACTTATGT	ATGGAGACTAATCTTTCTGAAGAAAAACAAAAACCGTCAAAATCACAAGCCCAGCAGAGAAGACAAATGGAAAATTATGAATTCTCACAGCTAGCCAATGAACTTCCATTGGCAAGAGCAATTTCTGGACAGCATATTGATAAAACAACGATGGTTAGATTAGCAACTGCTTATATCAAACTTCACAATATATTTGGGCAATCTCAAAGAGCCTACAGTTCAGCTGACTATTATTATGGAAGTGACTCTTTATGGACTAACAATCATTTAGATCTACTAGATGGATTCTTTGTGATACTGGACAGGCGCGGAGATGTACTTTACATAAGTGAAACTATTAGTATTTACT	METNLSEEKQKPSKSQAQQRRQMENYEFSQLANELPLARAISGQHIDKTTMVRLATAYIKLHNIFGQSQRAYSSADYYYGSDSLWTNNHLDLLDGFFVILDRRGDVLYISETISIYL	Z003_12780	Caenorhabditis_elegans	T01D3.2	HLH	HLH
214	16D12	pTH9883	TGTCACGGACCTACGGCGCGCCATGGCTAAGGCTGCCGCCG	TAGTGCACCACAATCCTGCAGGGGGACTTCTTGTAGTTGGCGA	ATGGCTAAGGCTGCCGCCGGAAAGAAGGCTTCCCCAGTGAAGCGAGTCAAGAAGGGAGGAAAGGCCAAGGACCCGAACGCCCCGAAGCGCGCCATGTCCGCCTTCTTCTTCTGGATGCAGGAGAACCGTGAGCGCATCAAGAAGCCAGGTATGGGAGTCGCCGATGTCGCCAAGGCCGCCGGAGTCGAATGGGGAAAACTCACCGACAAATCTAGATGGGAGAAGAAGGCCGCCGACGATAAGAAGAGATACGAAGTCGATATCGCCAACTACAAGAAGTCCC	MAKAAAGKKASPVKRVKKGGKAKDPNAPKRAMSAFFFWMQENRERIKKPGMGVADVAKAAGVEWGKLTDKSRWEKKAADDKKRYEVDIANYKKSQ	Z003_17289	Caenorhabditis_elegans	Y48B6A.14	Sox	HMG_box
215	14B11	pTH9056	TGTCACGGACCTACGGCGCGCCTCACCTGGAAATGGTCCAGG	TAGTGCACCACAATCCTGCAGGACTCTTTCTTCACAATCGGAGTG	TCACCTGGAAATGGTCCAGGAACTCCATTATCACGGAATAATTATGCTCATCATCATCAGCAACATCAAAATCAACAGCATGTTGGAAAGATTCGTGGAACAACCGAATATCCGCTGCGAAAACGTGTTGGTGGATCAACAGTGAAAACAGCAAAAGTTTGGAGATATTTCGATGAGCTTCCAACTATTGAACAAGCTGCCGAGTGTCGAATTTGCCGGAAAAAAATAAAAGCAACTAATTCAAGCACTACTGGAATGATTCGCCACTTGAGAAGTTGTCATGTTCAAGAGTATCAGCTTGTCCAAGAAGCTCGACAGAACAGTATGATCGTCAAAATGGAAGAAAAAGCCCGTGCAAAGCTTCTCCGAGAAATGAACGAAAAAGTTATAACGAATGGA…	SPGNGPGTPLSRNNYAHHHQQHQNQQHVGKIRGTTEYPLRKRVGGSTVKTAKVWRYFDELPTIEQAAECRICRKKIKATNSSTTGMIRHLRSCHVQEYQLVQEARQNSMIVKMEEKARAKLLREMNEKVITNGIENTPIVKKES	Z003_6580	Caenorhabditis_elegans	F25H8.6	zf-BED	zf-BED
216	13C03	pTH9896	TGTCACGGACCTACGGCGCGCCTATTCCCATCAACAAGCAACACAT	TAGTGCACCACAATCCTGCAGGCAAATGTTAATTTTTCAATCATTCTGC	TATTCCCATCAACAAGCAACACATGAATATCACCTTCCCGATCAGGAAGTATTCCAGAATCAAAATGAGTTTTCTGCAAGTCCCCCGGATATTTCGTCTCCGTTCGCCGATGAAAAGATTTATAAAAGTCTTCCGAGGAATAAATGCCCTTCAAAATGTCTTGTGTGCAGAAACCCTGCAATAGGATATCATTACGATGTACCATCATGTAATGGTTGTAAAACATTTTTCCGTCGAACAATTATCACGGGAAGAAAATTCACATGTGCTAAACAAAAGAAATGTATGGATGGAACAGAACCAGTTGATATGTCGAAGCGTCTTTGCCGAGCTTGTCGCTTTGCAAAATGTGTGGAAGTTGGAATGAATCCAATGGCAATTCAAGCAGAAGTTAAAACT…	YSHQQATHEYHLPDQEVFQNQNEFSASPPDISSPFADEKIYKSLPRNKCPSKCLVCRNPAIGYHYDVPSCNGCKTFFRRTIITGRKFTCAKQKKCMDGTEPVDMSKRLCRACRFAKCVEVGMNPMAIQAEVKTDEGKVLRSEVLNQRESLGVVSSLIVTEEDLLSRMIEKLTFV	Z003_1671	Caenorhabditis_elegans	C13C4.2	zf-C4	zf-C4
217	13D10	pTH9898	TGTCACGGACCTACGGCGCGCCATGGTGGACACCATGATGAACA	TAGTGCACCACAATCCTGCAGGCATGGTTTAAAGGCTCGCCG	ATGGTGGACACCATGATGAACACAAATACAGATGGTGTCACAGCGGTTCCTCCGATCTTTCCACTACCGTCGACGACACCAAACAGAAATAATAATAATGAACTGGCGATGTTGGCACAGAAGCAAATAGTCGCCGGATTACTGTTACAACAACCAACGATTGTGCAGGCAGCGGTGAATGGAACCAATTCGCAAAAACATTTGGCAGATATTGACTATACGAATGTTATTCAGACTCTTCAAGCCCTTGGCACTACAAATCTAAAAGCATTCTCTCTACTTCTTGATCCACAATCCCAAACATCTCAGTTAATATCTGAAGATACACGTCCATCTGCCAGCTCATCACCGTCTTCAACTGCAACTGCAGTATCTAACAGTGGACAATCAAACGCAACA…	MVDTMMNTNTDGVTAVPPIFPLPSTTPNRNNNNELAMLAQKQIVAGLLLQQPTIVQAAVNGTNSQKHLADIDYTNVIQTLQALGTTNLKAFSLLLDPQSQTSQLISEDTRPSASSSPSSTATAVSNSGQSNATSTSSSSTEPEYKPRNVREKVYADGYIMSFDKKSCCGTKEFWRCERKNDCNARMHSDINTREIVRKLHPHNHEKPSPEELAFYEQDFSTLHPNYCHPVKSINRSYMQRKLSRASHVSQALPIAPQQIKAEPMEVDTTNQTIQNFQQNNNLMLLASINAAATAAAAATSAGISPPVVGQKRVSTTVMPITLKSQRTTPKEEEDSSQLMSQEEFRITYELTKKLMEMMKPKTEIGVRWQGDEGSILLFLSHDNGAEENVFFPVVVMNRD…	Z003_2472	Caenorhabditis_elegans	C26E6.2	FLYWCH	FLYWCH
218	13E12	pTH9899	TGTCACGGACCTACGGCGCGCCGAATCAGGAACGAGTTCGCTG	TAGTGCACCACAATCCTGCAGGATGAAGCTGACTGATATCCAAATGT	GAATCAGGAACGAGTTCGCTGTCCTCTTTCGATATGATGATGAGCATGTTCCCTGATCCAACACGTCCGACTGTGAGCGATGATCGAATGGCTCCTCCGGCGGCTACTGTGCGAAAAAACGTTGTCGTCCGAAGACGTCCCCGTGAGTGTTCAATGGTTTGCTGGTTGTTCAGAACATTACTGACATCCGAATATCGAGCTTTGCCAGCCAATGCAATTTTTGAAATTTTTGAAGAAACTATGCAACAATCCACAGCTGGAAGCGCCCGTCATTATCGAGACTCAATTCGTCACTGTTTAATGACTTCTGCTGTTTTTGTACGCGTTCTGACCCCGAATCCACGCAAGGATTTTCTTGTGATGAATGAACAAGGATCATGGTGGACAGTACATCCAGAC…	ESGTSSLSSFDMMMSMFPDPTRPTVSDDRMAPPAATVRKNVVVRRRPRECSMVCWLFRTLLTSEYRALPANAIFEIFEETMQQSTAGSARHYRDSIRHCLMTSAVFVRVLTPNPRKDFLVMNEQGSWWTVHPDCEMACAEHVFRSGSAHRCPPQASIPAYYARVRMEETKAASSGNSTAGPIRATFGYQSASS	Z003_3006	Caenorhabditis_elegans	C34B4.2	Fork_head	Fork_head
219	13G01	pTH9900	TGTCACGGACCTACGGCGCGCCATGGACCTGCCTGTAACCC	TAGTGCACCACAATCCTGCAGGCACGTGTGTCCCCGAGCTG	ATGGACCTGCCTGTAACCCCAGGTGCTCCCAATTTTGCTCAGTTGCTTGACCCAGTTCATTCTCAGGAGTTGGGCAAGTTTGTCTACCAATGCAAAGCGTGTAGCAGAATTTACGCGAGCAGGAAATCTCTGAAGTCCCACCTGAAGAGCTACAAATATGCTCGGGAAGTCGCTGGATACAAAAGTAAGCATACATGCGAAATCTGCGGAGCCCATTACTCAAGTAAAATATACTTGAACCGCCATATGAAAAAGCATCTGGAAACTGCTGATTCTGGAGCTCATGCAATTCCCAGTCTGGGCTCACCTGCTCCTTCTTCTTCAGGCTTTGCAACTATGATCGTTCCACCAGCTCCGTTGCTCAGCGCTATTTCTTCTGGATCTCCACAGCTCGGGGAC…	MDLPVTPGAPNFAQLLDPVHSQELGKFVYQCKACSRIYASRKSLKSHLKSYKYAREVAGYKSKHTCEICGAHYSSKIYLNRHMKKHLETADSGAHAIPSLGSPAPSSSGFATMIVPPAPLLSAISSGSPQLGDTRV	Z003_3734	Caenorhabditis_elegans	C46E10.8	zf-C2H2	zf-C2H2
220	13H07	pTH9901	TGTCACGGACCTACGGCGCGCCGATATGACGGATAACGACGGAAG	TAGTGCACCACAATCCTGCAGGTGTTGAAGTTCTCGAGGATGTG	GATATGACGGATAACGACGGAAGCGTTGACGACTCCTACTTTGAGCCAAAGAGCAAGAAAACTAAATCCGCCGGACTGGAAAACTTCAAGCCACAGACCAGAGCAAGAAAGTACAAACTCAAGGCAGACGAGGAGAAGGCTGAGCCGACCTACAAATTGAAAAGAGCCCGGAACAATGATGCCGTCAGAAAATCGCGTAAAAAGGCAAAGGAGCTCCAGGACAAGAAGGAAGCCGAGCACGACAAGATGAAGAGGCGCATCGCCGAGCTTGAAGGGCTCCTCCAGTCCGAGCGTGACGCCAGACGTCGGGACCAGGACACCTTGGAGCAGCTTCTCAGGAATAAAGGCCCGATGAAAGAGCAACGCATGCCCCAACGCCACATCCTCGAGAACTTCAACA	DMTDNDGSVDDSYFEPKSKKTKSAGLENFKPQTRARKYKLKADEEKAEPTYKLKRARNNDAVRKSRKKAKELQDKKEAEHDKMKRRIAELEGLLQSERDARRRDQDTLEQLLRNKGPMKEQRMPQRHILENFNK	Z003_4436	Caenorhabditis_elegans	D1005.3	bZIP_1	bZIP_1
221	13H08	pTH9902	TGTCACGGACCTACGGCGCGCCGAAACTATTGATGATGAAAAGTTAGAA	TAGTGCACCACAATCCTGCAGGTTGAATCTTCTTCTTCTTCCATATCAG	GAAACTATTGATGATGAAAAGTTAGAAGCTTTCATCAGAGAATCATCTGATCGATATCTTATTCCTATTGATAGAGCTCTGTATATCCTAACAATAAATAACTTCAATTTTGACTCGGCCATAGCAGAAGTTGCACGACGTAATGAACTGAAAGATGTGTGGACAGATCAGGAAATTACTCTTTTTGAGAATTGTTACCAGATTTTCGGCAAAAATTTTTCACAAATTAGATCAGCGCTCTGTCATCGATCTCTTCAGTCAATTGTTCAGTTTTATTACGAATCAAAAAAACGTGTAAAATATCTAAACTTTGTCAATTCGAAATGTGATGATAGTAGTAGTTCGGAAGAAACTGAAACTCCATCTCCATATCCTGAAGCTATTTTCGAGTCAATGTGT…	ETIDDEKLEAFIRESSDRYLIPIDRALYILTINNFNFDSAIAEVARRNELKDVWTDQEITLFENCYQIFGKNFSQIRSALCHRSLQSIVQFYYESKKRVKYLNFVNSKCDDSSSSEETETPSPYPEAIFESMCDNCGEKAENMQINNAMNRPECRACLIYFNQTGVPRPTSLRLVLAERIRNQVSCPDNMKEYMKDFDKLSAQATGSTFQKRIIVKDQCVEYIIDVDKIPSSSCTENGNVGETSSPSAQKTEIQSESDGSGPLIWRHKKTVCMEEIEVLADDSRRKMFEACQHGSKVDIKLVASWKNDMTNLRKRVEQTYYDPDLNPTYLFSHDRVHYSQDWTQLERSQVIRCFNMYGAHFEHIADVIGTKTPDQVYQFYLENQKAIDAADEEFLADMK…	Z003_4469	Caenorhabditis_elegans	D1014.8	Myb_DNA-binding	Myb_DNA-binding
222	14C04	pTH9903	TGTCACGGACCTACGGCGCGCCGAGGATGTACCAATTCCTAGAAATGG	TAGTGCACCACAATCCTGCAGGGGTCATAAACTTCCGCTTGTGTAA	GAGGATGTACCAATTCCTAGAAATGGTCTTGCCTCAAAAGTAGCCCGTCGTGATACAATGGCTCTGAAACTGGATGCTCCACCGTGCAAAAATGATATAAATGGACAAACTGCAGATGATCGAAAGAAATTAATGAAGACGGCGTCAATCAAATTGGCCCGAAAACTAAGCGAACGTCCAACTCCTGAAGAATTAGAAGATAGAAATATATTGCGTCGGCGTGGAATGACGTCTTCCGAAGCAATGGAAGAAAAAAGAAAATTGTTGTTGAGAAAGCTAAGCTTCCGACCTACAATAAAAGAACTAAAAGAACAGCAAATAATTCAATTCGCGGATTATGTTGAAGTTACACAAGCGGAAGTTTATGACC	EDVPIPRNGLASKVARRDTMALKLDAPPCKNDINGQTADDRKKLMKTASIKLARKLSERPTPEELEDRNILRRRGMTSSEAMEEKRKLLLRKLSFRPTIKELKEQQIIQFADYVEVTQAEVYDR	Z003_6721	Caenorhabditis_elegans	F26H9.2	RPEL	RPEL
223	14D11	pTH9904	TGTCACGGACCTACGGCGCGCCATGGAAGACAATCGGAAAAGAAACA	TAGTGCACCACAATCCTGCAGGAATACATTGCAACACTTTCAGTGAC	ATGGAAGACAATCGGAAAAGAAACATGGAACGCCGTCGTGAAACATCGAGACACGCGGCTCGTGATCGTCGGTCTAAAGAATCGGATATATTTGATGATCTGAAAATGTGTGTGCCTATTGTTGAAGAAGGTACCGTAACTCATCTAGACCGTATTGCACTTCTTCGTGTTGCCGCCACAATTTGTCGACTGCGCAAGACAGCCGGTAATGTATTGGAAAACAATTTGGACAATGAAATCACAAATGAGGTATGGACTGAAGACACCATCGCCGAATGCTTGGACGGCTTTGTTATGATTGTTGACAGTGATTCTTCAATTCTTTACGTCACTGAAAGTGTTGCAATGTATT	MEDNRKRNMERRRETSRHAARDRRSKESDIFDDLKMCVPIVEEGTVTHLDRIALLRVAATICRLRKTAGNVLENNLDNEITNEVWTEDTIAECLDGFVMIVDSDSSILYVTESVAMYL	Z003_7643	Caenorhabditis_elegans	F38A6.3	HLH	HLH
224	14G02	pTH9905	TGTCACGGACCTACGGCGCGCCGATCCAGATCATGAAAATTTGCTTCC	TAGTGCACCACAATCCTGCAGGCGATTTGTTGCACAATTTTGTCAGT	GATCCAGATCATGAAAATTTGCTTCCATCTCCTGTTCCAAGACCATCTCCAGCCATGTCACAACTCTCCGATGCTTCATTTCTTTCACAAGACGGAGGAGCGGTCAACACAAGTGCCGACGAGGCAGATGACGATCTAGAAGTGACATCAAGAAAAGAAAAGAGTTTGGGATTGCTCTGTCAAAGATTTCTGATTGCTATCAATGAAGAGACAGTCGGCTCATCAACAAGAGAGGTCCATCTGGAGACCGTTGCAAGGAAAATGAATGTTGAAAAACGACGAATCTACGATATTGTCAATGTAATGGAAGCGCTCGACGCCATGCAGAAAACTAACAAATCATACTATCAATGGCAAGGATTAGAGTCTCTTCCAAAGCTCATGTTTGATTTGCAGAAC…	DPDHENLLPSPVPRPSPAMSQLSDASFLSQDGGAVNTSADEADDDLEVTSRKEKSLGLLCQRFLIAINEETVGSSTREVHLETVARKMNVEKRRIYDIVNVMEALDAMQKTNKSYYQWQGLESLPKLMFDLQNEAVEEGLPERVLRVEQAMCSFTELSSPRGKQGFKDIVGSFVSCTSTPTTPSTSFDSVTVKMEPAGLLEKRSRVDTRDRQGRNSLAQLCRRFLMVLLSNPKNIRKVSLDVASTVLIKDPETEGFEPPSRSRCRRLYDIANVLVALGLIKKVHYLFGTKKIPLFVYCGPEPDQTGSFDVFQSVERLLSSSQNVPQTPIIKAQTDKIVQQIA	Z003_8760	Caenorhabditis_elegans	F49E12.6	E2F_TDP	E2F_TDP
225	14H07	pTH9906	TGTCACGGACCTACGGCGCGCCTCATCATCATCTACAAACGGTGGA	TAGTGCACCACAATCCTGCAGGCAGATGGCTGACAAGCTTCTTC	TCATCATCATCTACAAACGGTGGATTCGTGAAATCTAGCACTGGAGAACGTCGCAAGTATCCACCACTTCGACTGGATGAAGAAGAAATCAAATTGTGCAAGAAAGAAGGAATATGTCTACCAGACTTCTTCCCACTTACAAAAGCCGAGGAACGTGATCTGAAACGTATTCGACGAAAGATTCGCAATAAGCGTAGTGCACAGACAAGCCGCAAGAGGAAGCAGGATTATATCGAGCAATTGGAAGATCGTGTCTCCGAGTCCACCAAAGAAAACCAGGCACTGAAACAACAGATTGAGAGATTAAGCAGCGAGAATCAGTCAGTAATATCCCAACTCAAAAAACTTCAAGCTCAACTTGGACAAAATGCAAAGAGAACTACTCAAGCAGGAAGATGT…	SSSSTNGGFVKSSTGERRKYPPLRLDEEEIKLCKKEGICLPDFFPLTKAEERDLKRIRRKIRNKRSAQTSRKRKQDYIEQLEDRVSESTKENQALKQQIERLSSENQSVISQLKKLQAQLGQNAKRTTQAGRCLAVFMLSACLLVSPQLSPLGNQDNQKVLECIEEACQPSA	Z003_9631	Caenorhabditis_elegans	F57B10.1	bZIP_1	bZIP_1
226	14H11	pTH9907	TGTCACGGACCTACGGCGCGCCGCTCAAATGTCCGTTGCAGAT	TAGTGCACCACAATCCTGCAGGTGACCGAGCTTGTTGGTGT	GCTCAAATGTCCGTTGCAGATCGTATGACGTCATCATCGGTGGCACCTCCTCTCTGCATTGTACCCAGATCTGTCGAATTCATTAACCCGAAAACAGAAGATATGAGTATGGATATACCAATGGGAAATGTGCAAAGCGAGTTCACCGGACTGAAGTGCCGAGTATGCGGGGATTCCAGAGCCGGTCGTCACTACGGAACAATCGCATGTAATGGTTGTAAAGGATTCTTCAGAAGAAGTATCTGGGAGCAACGTGACTACGTATGTCGGTTTGGTGGAAAGTGTCTTGTTGTTCAAGAATACCGTAACCGTTGTCGTGCATGTCGGCTACGAAAATGTTTCACTGTCGGAATGGATGCAAGAGCCGTACAATCAGAACGAGATAAGCATAAGAAAAAT…	AQMSVADRMTSSSVAPPLCIVPRSVEFINPKTEDMSMDIPMGNVQSEFTGLKCRVCGDSRAGRHYGTIACNGCKGFFRRSIWEQRDYVCRFGGKCLVVQEYRNRCRACRLRKCFTVGMDARAVQSERDKHKKNPKDSNNEGSTSPQYPTASTPISIPSTSTSQTPTSSVN	Z003_9866	Caenorhabditis_elegans	F58G6.5	zf-C4	zf-C4
227	15C01	pTH9908	TGTCACGGACCTACGGCGCGCCGATACAGAACATGTTAGATATAGTGTT	TAGTGCACCACAATCCTGCAGGAAAAAGTTCCGAATTCATAAGGAATCG	GATACAGAACATGTTAGATATAGTGTTTCTTTGCCGCGCACAAAACGAGTAATTGCACTTCGCTATGAAAAGGAAACACCTTCAACATCTTCTGAAACAAAAACGAAGCGAATCCGGACGGCTGCTCAACTTTTAGGAGATACTGAAGATTATTGTTGTAGGACTTGTTTCAAACGTTTCTCTCGGAAATTCAATTTGGAACGCCACGAGGACGGGTGTTTGCCGAAGCCAATTCTTTTCCAATGCCCAATTTGTCATCAAAAGTATAAAAGAGCTCCATATTTTGCGGCTCATATTCGGCAACACGAAGCTGAAGAGAAACGACAACATCGTGACGTCAAACGTCTTGCAATTGAGCATGGAAATATGGACGAAATACGACGAAAAGCTGAAGAATCT…	DTEHVRYSVSLPRTKRVIALRYEKETPSTSSETKTKRIRTAAQLLGDTEDYCCRTCFKRFSRKFNLERHEDGCLPKPILFQCPICHQKYKRAPYFAAHIRQHEAEEKRQHRDVKRLAIEHGNMDEIRRKAEESVNKLSIPYEFGTFL	Z003_11336	Caenorhabditis_elegans	K11D12.12	zf-C2H2	zf-C2H2
228	15C03	pTH9909	TGTCACGGACCTACGGCGCGCCCCAAGTAAAAACAAAGTTAGGAGCAAG	TAGTGCACCACAATCCTGCAGGAATGCACCTTTTTCGAAGAGCC	CCAAGTAAAAACAAAGTTAGGAGCAAGAATTCTAATTCAGAGCAAAAGCGAACCGGAAACTTCCTCTCTCAAGTCGTCGAAAATCTCATGACCAAGGTTGACGCGAATATCTTATCGAGGAGGGTTGGAAAACTATTCAAGAATCACAATGAGTGCACTTTCTGCAACATAAAATTTATTTCATTTTTTGAAATGTGCCGTCACGTGGGAAGCATTCAACTCAGAATGAAGATTAACCACTTGCGTTATCAAGATGTCCATGTTGGAACTTGGGTGCGTTTTCTGGCTTCGGCAACTCCACAGAAACAAACAATTGAAGATGTAATTGACGGAGGCTCTTCGAAAAAGGTGCATT	PSKNKVRSKNSNSEQKRTGNFLSQVVENLMTKVDANILSRRVGKLFKNHNECTFCNIKFISFFEMCRHVGSIQLRMKINHLRYQDVHVGTWVRFLASATPQKQTIEDVIDGGSSKKVHS	Z003_11388	Caenorhabditis_elegans	K11H3.4	zf-C2H2	zf-C2H2
229	15E08	pTH9910	TGTCACGGACCTACGGCGCGCCATGCAAACTACCTGTGAAATCTGT	TAGTGCACCACAATCCTGCAGGTAAGGATTTCCAAGCCTCGGG	ATGCAAACTACCTGTGAAATCTGTGAGGTTCCGGCTCACGGGATTCATTTTGGAGCAATCACTTGCCGTGGGTGCGCTGCATTTTTTAGACGAGCCGTCAATACAAAAACAAATAGGAAAAGTTGTAAATACTCAAGTAATTGCACGAATTTCACTGGAAAATTCCCACAATGCAAAAGCTGCAGAATGAGAAAATGTATAAAAATGGGAATGATGCCGGAAAAAGTCAAAGTGATGCAACCTATTTCCCAATCTCTGGAAATATTTGTGAGCAGACCCAATTTAATATTATTTACAAACAATTACGATAAAACTAGAAATTACATAGACGTCAGCAACTTGATCACCCGAGGCTTGGAAATCCTTA	MQTTCEICEVPAHGIHFGAITCRGCAAFFRRAVNTKTNRKSCKYSSNCTNFTGKFPQCKSCRMRKCIKMGMMPEKVKVMQPISQSLEIFVSRPNLILFTNNYDKTRNYIDVSNLITRGLEILK	Z003_12811	Caenorhabditis_elegans	T01G6.4	zf-C4	zf-C4
230	15E10	pTH9911	TGTCACGGACCTACGGCGCGCCACTAATGTACAAGCAAAAGAACAAATT	TAGTGCACCACAATCCTGCAGGCGGTGACAGTTTTCATTCCCAT	ACTAATGTACAAGCAAAAGAACAAATTCTCGAAGAAATCGTGCGCGAGTGCGAAGAAATCGAGCGTCGTTCCAACTCGAGCGCGTCTCCAGCCTCAAATTGGTCTTCAGATGAACATGACTCTCAATCCGAAAAATCTTACCACCCATACAAAACCCCAGAAAAGAAGGAACGAAAGAAGGCTCAAAACCGTCTCGCAGCTACCAGATACCGTGAAAAGAAGCGTCGTGAAAAGGAAGAGGCTATGACTTGCATTGAAGGTCTTAGTGTCACCAATGGCAAGCTGAAGGATCAGGTATCCGAGTTGGAGCGTGAAATTCGTTACTTCAAAAAGTTCATGACCGAGATGGGAATGAAAACTGTCACCG	TNVQAKEQILEEIVRECEEIERRSNSSASPASNWSSDEHDSQSEKSYHPYKTPEKKERKKAQNRLAATRYREKKRREKEEAMTCIEGLSVTNGKLKDQVSELEREIRYFKKFMTEMGMKTVTD	Z003_13018	Caenorhabditis_elegans	T04C10.4	bZIP_1	bZIP_1
231	15E12	pTH9912	TGTCACGGACCTACGGCGCGCCATGGAGCCGCCATGCACAT	TAGTGCACCACAATCCTGCAGGTTCCGTTTGTCAAGCTTGAGG	ATGGAGCCGCCATGCACATCAGACTGCAGCCAGATAAAAGTCTTCTACTATCTCGACGATGAAACGACTCCCTATGTTTCTGTTATTGAAGCCAGAGAAGGAGTAGCGACGCTTGGAAATTTCAAAAATTCATTCACCAAGCGTGGATATAAGTATTATGCGAAGGAACTTGACCCGGATATTCAACGAGAAGTTAAAGTCGAATTAACAACTGATTCGGATCGGCTGCGCAAATCCCAGAATGGATTTTATGAGATTTTTCTCGTTAGCACTCCAGGATATGGAACTCTTCCTCGAAACAGTGGAACAATGACGCGACCACAGAGAACTGCTCTAGATAAGCGCCGCCGACGAAGTGCAGACTTTGACGCGACTCCGTACTCTGATGCTAGTCTTGCT…	MEPPCTSDCSQIKVFYYLDDETTPYVSVIEAREGVATLGNFKNSFTKRGYKYYAKELDPDIQREVKVELTTDSDRLRKSQNGFYEIFLVSTPGYGTLPRNSGTMTRPQRTALDKRRRRSADFDATPYSDASLAPSTIVSRRAGEHLAELYTSNSEDPYQYDEHTRRTGDDSSLYEPLAARDMNKIYDDDRRRKKQKKERFRRPYVPSTISSATESSVNSGLPRILEIYLPMKNVPYLGLSVCTIDGHIFVSEIAPEGAVEKDGRVNVGDQILQVNRVSFEELSGPQAVRSLREAASSKRQNTEKMKALGLDPQEQTATTIDDGTLPFTSTASDDEERMLYDQRRNGIPRALIEEAERKRENEQNEKIEQLTEMIDPIIVVRSMARPDSGLAVKNRKWLK…	Z003_13137	Caenorhabditis_elegans	T05C12.6	PDZ	PDZ
232	15G04	pTH9913	TGTCACGGACCTACGGCGCGCCGCCAGCGGACAACGGAAGC	TAGTGCACCACAATCCTGCAGGTGTAATGGGACATCTTGTCGTGA	GCCAGCGGACAACGGAAGCGTGGACGTCAATCCAAGGATGAGCAGCTCGCCAGTGACAACGAGCTTCCAGTGTCGGCGTTCCAGATTTCGGAGATGTCATTAAGCGAGTTGCAACAAGTGTTGAAGAACGAGAGTCTCAGCGAGTATCAAAGACAGTTGATTCGCAAGATTCGTCGACGCGGAAAGAACAAGGTTGCTGCCCGCACTTGCCGTCAAAGACGCACGGATCGTCACGACAAGATGTCCCATTACA	ASGQRKRGRQSKDEQLASDNELPVSAFQISEMSLSELQQVLKNESLSEYQRQLIRKIRRRGKNKVAARTCRQRRTDRHDKMSHYI	Z003_14127	Caenorhabditis_elegans	T19E7.2	bZIP_1	bZIP_1
233	16A08	pTH9914	TGTCACGGACCTACGGCGCGCCATGGATATCACTGAACTTGAATGTCTA	TAGTGCACCACAATCCTGCAGGTGTAGTCATAAGTTGAAGAACATTGTA	ATGGATATCACTGAACTTGAATGTCTAGTGTGTAAAGCGCCATCAACTGAACCACATTACGGTGCAGATGTGTGTAGGGCATGTGCTGCATTTTTCCGTCGTCGAGTTTTCTCACGTTTCCCAGCTACTTGTGATCAGCTTGGCTCATGTGAAATCACTGGTGAACGTGAAGTAAGGCAGTGTAAAGCATGTCGGATGGAAAAGTGCTTGCAGATTGGTATGAGGATTTCAAATGTTCAAAGCAAAAGGGATAAGCACGACAATGATAAGTTGAAAAAGAAAGACGAAGTTTCGGAGAAAGCGCTGGTACCAGCTTGCTATTCAAAAGTGAGCATACTTCCGAATGAGCTACAATGTTCTTCAACTTATGACTACA	MDITELECLVCKAPSTEPHYGADVCRACAAFFRRRVFSRFPATCDQLGSCEITGEREVRQCKACRMEKCLQIGMRISNVQSKRDKHDNDKLKKKDEVSEKALVPACYSKVSILPNELQCSSTYDYN	Z003_15002	Caenorhabditis_elegans	VC5.6	zf-C4	zf-C4
234	16B01	pTH9915	TGTCACGGACCTACGGCGCGCCGACATTCCATTTGACGTGAAACG	TAGTGCACCACAATCCTGCAGGGTCTTCCGAGCACCGCTTG	GACATTCCATTTGACGTGAAACGGGAGATTCAGGAGCATTTAGTGCTCCAAAACGGCAAGAAACAAATGTCAATCGAAGAAATTGTCAAGCTCGTCGTCGTCGCCCTCAAAGATTCCCAAATCGAAGAAGGTCGTGAAGAGGAAGAGTCTCCCGAGGAAATTCTCCGACGAAAGAGAATTCAGAACAACCTAGCGGCTGCCCGGTACCGCAAGCGACAACGCGAGGCTCGCGAGAGCGCCGAGAGTGAGCTCGGTGACCTGACCCGACGGAACGATGAGCTCCGCGATCAGGTGTCCCGAATGGAGCGGGAAATTGATCGGCTGAAGCAAGCGGTGCTCGGAAGAC	DIPFDVKREIQEHLVLQNGKKQMSIEEIVKLVVVALKDSQIEEGREEEESPEEILRRKRIQNNLAAARYRKRQREARESAESELGDLTRRNDELRDQVSRMEREIDRLKQAVLGRQ	Z003_15474	Caenorhabditis_elegans	W07G1.3	bZIP_1	bZIP_1
235	16B02	pTH9916	TGTCACGGACCTACGGCGCGCCGAATGCGATCATATTATGAATAGCGC	TAGTGCACCACAATCCTGCAGGTTTTGGCAAGTTTGGCGAGG	GAATGCGATCATATTATGAATAGCGCCGGCGACTGCGAGAAATGTCAAGTAGAGCACGAGAATGGTGCTCAAGAAGCGATTCCGATTAATGATCTCGTCGATATTGTAATGCAAACTGTCGATAATTTGAAGAAGGAAGGCTCGTCGAATGATGAAACCAAGCTTCTATCCCGTAAACGCCAGCAAAACAAAGTTGCGGCCGCCCGTTATCGTGACAAGCAGAAGGCGAAATGGCAGGATCTTCTGGATCAGCTCGAAGCCGAGGAGGATCGTAATCAGCGGCTCAAGCTTCAAGCCGGACATCTCGAGAAGGAGGTCGCCGAGATGAGACAGGCCTTCCTCGCCAAACTTGCCAAAA	ECDHIMNSAGDCEKCQVEHENGAQEAIPINDLVDIVMQTVDNLKKEGSSNDETKLLSRKRQQNKVAAARYRDKQKAKWQDLLDQLEAEEDRNQRLKLQAGHLEKEVAEMRQAFLAKLAKK	Z003_15498	Caenorhabditis_elegans	W08E12.1	bZIP_1	bZIP_1
236	16D05	pTH9917	TGTCACGGACCTACGGCGCGCCTCGCTTTCGGATAACGATGAAAG	TAGTGCACCACAATCCTGCAGGAATTTGATTTATTAAAGCTTTCCAGTG	TCGCTTTCGGATAACGATGAAAGTGTCGATGATTCTTATTACAAACCAAAAAGTTCCAAAAAGACTGCTGCAGCGGTACCAAATTTCGTGCCAAAAACCAAGGCTCGAAAATACAATCTAAAGCCGGATAAGGAGAAAGTGGAGCCCATCTATAAATTGAAACGGGCTCGAAACAATGATGCCGTCCGGAAAAGTCGAAATAAAGCGAAAGAGCTGCAACTGCAGAAGGACGAGGAGTATGATGAGATGAAGAAAAGGATTACACAACTTGAAGCAGAACTACAATCCGAGCGGGAAGGCCGGGAACGTGACCAACAACTTATCAAGCAACTAATTCGCGAAAAGGAATCGACATCGAAAGGACCAAGGAAAAGCTCTCGAAATGCACTGGAAAGCTTT…	SLSDNDESVDDSYYKPKSSKKTAAAVPNFVPKTKARKYNLKPDKEKVEPIYKLKRARNNDAVRKSRNKAKELQLQKDEEYDEMKKRITQLEAELQSEREGRERDQQLIKQLIREKESTSKGPRKSSRNALESFNKSNY	Z003_16998	Caenorhabditis_elegans	Y44E3B.1	bZIP_1	bZIP_1
237	16F02	pTH9918	TGTCACGGACCTACGGCGCGCCGACAGTGCTTCATCTCTAGTGTC	TAGTGCACCACAATCCTGCAGGGTGGGATTTGTTGATGCGTGG	GACAGTGCTTCATCTCTAGTGTCCGCCGGCTCACCACACGGTTCATCGTCATCAAATGGCTCACACGGATCCTCACCACCGCTTCAAGTTCAGAGCCCATCTCAGGGCTCAGGATCCTCGGGATCTCCTACAGGTCAGCCGGAAAAACGGCATATTTGTACAGTTTGTGGAAAGGGATTCTCGTATTTTTCAATTCTGGAGTCGCACAAGAGATCACATACTGGGGAGAAGCCTTACAACTGCCATTTTTGCCAGAAAACTTTTGCACAAAAAGCCACGCTTCAAGTCCACGAGCGGACGCATACTGGCGAGAGACCATACAAATGTAGATACTGCGAGAAAACGTTCGCCCAATACGGCACTAAGACAGTACACGAGAAAAGTGCCCACTTGGGAATT…	DSASSLVSAGSPHGSSSSNGSHGSSPPLQVQSPSQGSGSSGSPTGQPEKRHICTVCGKGFSYFSILESHKRSHTGEKPYNCHFCQKTFAQKATLQVHERTHTGERPYKCRYCEKTFAQYGTKTVHEKSAHLGIRNYKCPKCDKLLSSPSALYTHKKTHGDKTFRCDFCPKTFALKNYLKLHVKQVHEQNERKHVCVYCNKGFAYAGSLQVHVRTHTGERPYVCKFCPKAFASQGNLQSHERTHTGERPYSCQFCQRTFIQKSQLTAHESTHLTQKHSVNPDSTTADILPVAGSVTDHQMVGNYECTFCNKKYPYASSLYIHMRKHTEKSAYSCDGCGKPYSQKISLNIHQDQCEAFKNRLKTTDSQFSHNCDGCGKSFVQRIALQIHVDSCEPHKNLAR…	Z003_17909	Caenorhabditis_elegans	Y55F3AM.14	zf-C2H2	zf-C2H2
238	16F10	pTH9919	TGTCACGGACCTACGGCGCGCCATGGAAAACTGGTACCCCTGC	TAGTGCACCACAATCCTGCAGGTTTCGTATGGAACGTCAAGCTC	ATGGAAAACTGGTACCCCTGCATAATTTGCGGAATCGCCCGTTATGGACATGACGTCATCGCCACACCACGGCTCACTTCGGATGCCCGTGTTAATCAATGGCTTAATCTAATCGGAAAACCTGCTCTAAACAGAATACTCGCCACCAACAAAAACCCCACACTCAACACTTTTATCTGTATTGAGCATTTCGAGCCGGAAGAGCTCATCGAGCCGAAAAAACGGCGGATGAAGCCGATAAAAACGACGAGGCGGGAGATGGCGATCTACGAGAATTATTTCCGGGATCATGGATACTTTGAGACGCAGAAAAGTGACGTGAATCGCAAGAAATCGATGAAATTGACGTCGATTTCGTGTTCTCAATGCAGTGAAAGTGTGGAGAGGGATGGAAAATTT…	MENWYPCIICGIARYGHDVIATPRLTSDARVNQWLNLIGKPALNRILATNKNPTLNTFICIEHFEPEELIEPKKRRMKPIKTTRREMAIYENYFRDHGYFETQKSDVNRKKSMKLTSISCSQCSESVERDGKFAKIDMVDHAKLHMELGDCRCEKHKKIERIDRIDGENSDFQCSECAFILNAELEAVKEKAEFCFPMFQFEKSKFSNSTLEPRMKPEYIESRPFWNSEEYDPVFLDSDVKFDLIEDFEPPEPEPEPEQVDTELVKLEPIDGDYEHMEGCFSGFEQEESEQPSTSSAPRKLVQQRDRLLENLYQSNRHPSMEDINSLLDFSGDQRSIEAIFGFFERRRNDDNEMCTGDDACSSLRRYLEMELHPHGPLLEPPEIRCRMIKMFEKHWAKY…	Z003_18302	Caenorhabditis_elegans	Y66A7A.5	THAP,Homeobox	Homeobox
239	16H02	pTH9920	TGTCACGGACCTACGGCGCGCCATGAACCAATTAGTGTGTCCATTGT	TAGTGCACCACAATCCTGCAGGGCTCTTCCTCTGTTTCTTCTTTAACT	ATGAACCAATTAGTGTGTCCATTGTGCTGCGAAACGCTGAAAGAGGAAGGCGCACACTTCTACAAACATTTTAAGTACAAGAGATATGCATGCGGAGAGAGCACATGTGATATGGGATTCTACACACAACAGGAGCTCAATGCTCATTGCTCGAAACACGGACACAAGCGCTCTTTTCAGAAGACAGTAAACCCATACATTGACAAAATGATATCGGTTGTTGTGGAAGACGCATACGCCCTAGCGACTGACGATATGGAAACTGTGCTTGAGAAGCGATGGGGAAGAGATCCGAGATCAGTGTCACCGACTTCACCTGTTAAAAAGACTCCTACTGATAGTGCAAAGAATAAAAGAAGTTCCGTCGTAACTCCAACATCTCCTCCAGTGCCAAAAAAG…	MNQLVCPLCCETLKEEGAHFYKHFKYKRYACGESTCDMGFYTQQELNAHCSKHGHKRSFQKTVNPYIDKMISVVVEDAYALATDDMETVLEKRWGRDPRSVSPTSPVKKTPTDSAKNKRSSVVTPTSPPVPKKAKSGTSTTSPFAFLNRRTNNSESSLCPNASSTSAQPASSSSAQAIVDSTTSEHNISIDKTKKPRKKRNESMTAAQNQEKAGKNANYDEMSAIDKLIGWFDPNVPERRDAAKVKCAVCNEEIVYDFILRKGHVTRSHMAADVAPEDYDDLLKTAMDRSYPDLPNSDLACQLCMTGAEVRKNMRREHIEKLHTTSLPPLTCPVGECEKGFRRQCDLSSHMKDTHKASMAVYKNATFQQVRRRRNAMINEMINKCFPWSRLEAIENKTV…	Z003_19249	Caenorhabditis_elegans	ZC395.8	zf-C2H2	zf-C2H2
240	16H07	pTH9921	TGTCACGGACCTACGGCGCGCCAAAAATCCCAATGTTTTAACAAATGTG	TAGTGCACCACAATCCTGCAGGCGAAAACCTTCTGCTCAAGCTT	AAAAATCCCAATGTTTTAACAAATGTGGATAATCAGCAGGTTAAGGATGTCATCAACACAATCATTGCCGGAGATGAAACACTCTTGAATTCCGAACAAATTGGTGCAGTCAACGAATGGCTTGATACGCTGGAAACGAACGAGGATCGTAGAAGCCCAACACAAGTACAAAGATTCAACACTCTTTACGAAATTCCACGTCTTGATAAATGGTTCAAATCCGATGCAAATCCATCTAAACAAAAAATGAACAATTACTTAAGCCAGCTCAATCAGAGTCCGTTCAGAAAGAACAATTCCAAGATCAGCTATCAACAGATTTGCAATTGGTTCACACAAAAACGCTCGAGTTCCCGTACCTTAGCTCCAGTAGACCTAGTGCAGGTCTCGTCAGCTCAG…	KNPNVLTNVDNQQVKDVINTIIAGDETLLNSEQIGAVNEWLDTLETNEDRRSPTQVQRFNTLYEIPRLDKWFKSDANPSKQKMNNYLSQLNQSPFRKNNSKISYQQICNWFTQKRSSSRTLAPVDLVQVSSAQTAAQLLPGFQLNLLQSLFGEQRQKFDFYDKLDETKIVGGSDSPSPADDEIHSNSDETIQDTLFSINIKPEPEIDSIASSPDMANSMRESLSSTSPKLLSGLDLGAFSTHSSSTNSMQNANSSVFSAARSRLMFDPLTELPVLEKWFEENPHPTWMQIDQYTQCLNNCAYRENYPHISQHNVKIWFKNRRAKCKRLLNGMQEKLEQKVFV	Z003_19503	Caenorhabditis_elegans	ZK1193.5	Homeobox	Homeobox
241	13B04	pTH9922	TGTCACGGACCTACGGCGCGCCATGACATTCAGTGATCCAATGGATC	TAGTGCACCACAATCCTGCAGGAAAGTTTGTGGTCTCCTTCGC	ATGACATTCAGTGATCCAATGGATCCATCAATACCCATATTTCAACATCATGAGGAAGAAGAAGCCGGTCCCAGCACAACAATAAAAGCGGAGGAGGAAGATGGTCCATGTTGCTTAGTTTGTGGCCGAGTTGCAAATACTGGACATCATTACGGAGTGACTGCTTGTCTTGGATGTAAGACATTCTTCAGAAGAGTCGTACTTCAGAAGAACTCACCCAAATGCAAATACAAGAATCACTGTCGATTGGAGAAAAGCGTAAACGCGAAGAGGTTATGCAGAAGCTGCAGATATCAAAAATGTCTGGAAGTTGGAATGACCGAAGATGCCCTACATCCCTGCCGAGATGTGATTGGTCGTCGAGTTCGTAACAATTCAAGTGATTCTTCACCCATTTCA…	MTFSDPMDPSIPIFQHHEEEEAGPSTTIKAEEEDGPCCLVCGRVANTGHHYGVTACLGCKTFFRRVVLQKNSPKCKYKNHCRLEKSVNAKRLCRSCRYQKCLEVGMTEDALHPCRDVIGRRVRNNSSDSSPISSPPSIPTPLSICKLMNLSEGDHKLL	Z003_1189	Caenorhabditis_elegans	C06G3.1	zf-C4	zf-C4
242	13B07	pTH9923	TGTCACGGACCTACGGCGCGCCCCAGATTTTTTAACCAACTTCATCACT	TAGTGCACCACAATCCTGCAGGAATCTTCGGAATAATCTAATCCATTAA	CCAGATTTTTTAACCAACTTCATCACTTCTCAACCGAATATTTTCAGCGTAACTGGTCAGAATATAAAATCCTCCCCTTCAAAAAACGCAGGCCAAACGCCGAATGGCAAGCGCCAAGTTCCGCCAATGTTAACCGTAAACGGAAAAACGAGGCGTGGACGAATTGTGTACTCGACGCAGGAGTTGAATATACTCGAAAAATATTATGAGGAGGACCCGAATGCGTGTGCGGATCCTAGGAAACGTGAGACAATGTGCAAGACTTTATCGATTGATTATCATAGACTTAAAGTATGGTTCCAAAATCGACGACGAAAGGACAAGGTTCGATCGCAAGAAGAAGCTGCCACAACCTTTAATGGATTAGATTATTCCGAAGATT	PDFLTNFITSQPNIFSVTGQNIKSSPSKNAGQTPNGKRQVPPMLTVNGKTRRGRIVYSTQELNILEKYYEEDPNACADPRKRETMCKTLSIDYHRLKVWFQNRRRKDKVRSQEEAATTFNGLDYSEDS	Z003_1263	Caenorhabditis_elegans	C07E3.6	Homeobox	Homeobox
243	13F12	pTH9924	TGTCACGGACCTACGGCGCGCCCAACAGCAGAATCAGCAAGCA	TAGTGCACCACAATCCTGCAGGGAGCAATAGTGGAGAGACTAAATGAG	CAACAGCAGAATCAGCAAGCATTCAATTTTATGGTTGTGAAGCAGGAAAATGGAGAAACTGGAAGAAATTTTATGACAATGAAGCAAGATGCTCTGCAAGCAATCACTAATACAGTTTCAAGGAATTCACCGCCAAATGTTATTAAGGGCGAACGGTGTGTTGGATGTGGCAGTGAATCAGCGATTCGTGTTCACTACGGAGCCAGCTCATGTCATGGATGTAAAGCCTTCTTCCGTCGATCAGTTTTTGAAGGGAGAGTCTATATGTGCTCGGCTGACAATCATTGTGATATTACTAACGAATCCCGTAATCGATGCCGCGCTTGTCGTCTTCGCAACTGCCTCGAAGGAGGAATGAATCCAAAACATGTTCGAGAAGAACGCTCAAAAATTGAAAGA…	QQQNQQAFNFMVVKQENGETGRNFMTMKQDALQAITNTVSRNSPPNVIKGERCVGCGSESAIRVHYGASSCHGCKAFFRRSVFEGRVYMCSADNHCDITNESRNRCRACRLRNCLEGGMNPKHVREERSKIERMPGNTCTVSAANGVSHSSSAASASPEHKFSFSLSTIAP	Z003_3668	Caenorhabditis_elegans	C45E5.6	zf-C4	zf-C4
244	14G07	pTH9925	TGTCACGGACCTACGGCGCGCCGGATCAGAATCTCGAGTTATGTCTC	TAGTGCACCACAATCCTGCAGGCCAACAATTGCTGAGCTGACA	GGATCAGAATCTCGAGTTATGTCTCCAATTACACATACAAATATCAGTGATGAACTTTCAATCTCTACAACTCCAACAGTTGCATTTACTCCAAACGGATCAATTCCATCACCTGGTACTGGTTACTCATGGAGCATCAGACGTGAAGGCAAACTGGCTTGTCCAACACCTGGATGTGATGGATCAGGACATCAGACAGGACTCTACACTCATCACAGAAGTTTGTCCGGATGTCCACGTAGACCAGACAAGACTGTTATCCAAATGCTTGCTCTCCGACAAGACACCGTGCTCCGATGCACCACAGCCGGATGCTCTGGAAAGGGACATGTCAATGGAAATAGAACATCTCACCGTAGTCTCTCTGGTTGTCCAATTGCCCATCAGGAAAAGCTTGCA…	GSESRVMSPITHTNISDELSISTTPTVAFTPNGSIPSPGTGYSWSIRREGKLACPTPGCDGSGHQTGLYTHHRSLSGCPRRPDKTVIQMLALRQDTVLRCTTAGCSGKGHVNGNRTSHRSLSGCPIAHQEKLARKGIKTTPQRTKTPIKGISISDECPLDLTLSGLPAGLSAQQLLA	Z003_8899	Caenorhabditis_elegans	F52F12.6	zf-C2HC	zf-C2HC
245	14G08	pTH9926	TGTCACGGACCTACGGCGCGCCCCGAGAGCAGGAAGAAACAAG	TAGTGCACCACAATCCTGCAGGCATTATCAGAGTCTCCAGATTCGATAA	CCGAGAGCAGGAAGAAACAAGGAGTTGGCCCTTCACTTGCTCATGGAAAACAAAGGAAATATTGAGGCAGCCGTTGAGGATTTGTTGAGAAGTGACACTTTGGATTGGGAACACTATTCAAGTGTTTTTGGATACATGTACAATGACTCGGTCCTTTGGACTCCAGATGAAATATATCAGTTCCAAGATGCAATTTATCAATCAGAAAAAGATTTTGATAAGGTTGCAGTGGAGCTCCCAGGAAAATCTGTGAAAGAATGCGTTCAGTTTTACTACACATGGAAAAAAGATTGTCCAGATGATTATCGAAAACTCAGAAATTTAAGAAGAAAACGGCAGTTGCTGGACATCAATTTGCAGAAAAATCAATCAGAAGAGCCGGTCGTTCCAGCAAAGAAA…	PRAGRNKELALHLLMENKGNIEAAVEDLLRSDTLDWEHYSSVFGYMYNDSVLWTPDEIYQFQDAIYQSEKDFDKVAVELPGKSVKECVQFYYTWKKDCPDDYRKLRNLRRKRQLLDINLQKNQSEEPVVPAKKISIIESGDSDNE	Z003_9068	Caenorhabditis_elegans	F53H10.2	Myb_DNA-binding	Myb_DNA-binding
246	15F05	pTH9927	TGTCACGGACCTACGGCGCGCCATGTCCAAAGTCAAAGTATCAATCGA	TAGTGCACCACAATCCTGCAGGACATATGGGGAAAATAAAAAAGAAATG	ATGTCCAAAGTCAAAGTATCAATCGAAGGATCCCAAGAAACTCTCTGGAAGATATTCCACGCAGAAGTCAACGAGATGATTGTCACGAAGAACGGCCGAAAGTTGTTCCCAAAGTTGGAATATATAGTCGAAGGGCTTGATGAAAACAAGCTGTATGCAATAATGCTCCAATTACAACCAGTTGGAGAAAGTCGATTCAAGTTCAGCGGTGGAAAGTGGCAGGAAACGGGCAAAGCTGAGAAGCAGGTCGACGCGAAGAAGATGTGGCATGCTGATGGAGTTCGGAAGGGAAGTGACTGGATGTGGAGTTCGATTTGCTTTGATCGTGTGAAAATCTCCAACTATTCAGAGTCCAACAACGCTTCAATGATTTACCTCAACAGCATGCACAAGTACATT…	MSKVKVSIEGSQETLWKIFHAEVNEMIVTKNGRKLFPKLEYIVEGLDENKLYAIMLQLQPVGESRFKFSGGKWQETGKAEKQVDAKKMWHADGVRKGSDWMWSSICFDRVKISNYSESNNASMIYLNSMHKYIPVLTIYESPSESPFCVPQSSNQIVATAKFPHTEFIAVTAYQNQKITDLKIKHNSFAKGFRDGNLSRKRRSPSYSDGSNSQSPSPKSRSPPEVAPLQSMPPINPFLFYFPHML	Z003_13359	Caenorhabditis_elegans	T07C4.6	T-box	T-box
247	15H06	pTH9928	TGTCACGGACCTACGGCGCGCCACCGCCTCCACTTCACGTC	TAGTGCACCACAATCCTGCAGGCACGAATCGAATTGTTCGGGC	ACCGCCTCCACTTCACGTCCTGATAAACTCAATTTAACTCCACCACAACAATCCGCAGAAATTTACGCTTTCAACGGTGTCAACAGTGACGATTCAGACGGTGGATTAGATTCTCGAAGTGCTTCACGATGCGGGATGGCACTCGATGACCAAGAAAAGAAGAAGCTTGAGAGAAAGAGAGCTCGCAATAGGCAAGCCGCCACCAAATGCCGTCAAAAGAAAATGGATCGCATCAAGGAGCTGGAAGAACAGGTTCTCCACGAGAAGCACCGCGGTCAACGCCTTGACGCTGAACTCCTCGAGCTCAACAGAGCTCTTGAACATTTCAGAAGAACGGTTGAACATCACTCGGGAAATGGATGCCCGAACAATTCGATTCGTG	TASTSRPDKLNLTPPQQSAEIYAFNGVNSDDSDGGLDSRSASRCGMALDDQEKKKLERKRARNRQAATKCRQKKMDRIKELEEQVLHEKHRGQRLDAELLELNRALEHFRRTVEHHSGNGCPNNSIRV	Z003_14631	Caenorhabditis_elegans	T24H10.7	bZIP_1	bZIP_1
248	16A02	pTH9929	TGTCACGGACCTACGGCGCGCCAAATTGATAATAATTGTCCAAGCGATT	TAGTGCACCACAATCCTGCAGGTGTTAAAGACACGTCCTATTTCTCG	AAATTGATAATAATTGTCCAAGCGATTTGGCATGTTTGGAGCAAAGTTCACAAATGTGCCAGTACAGCACTTTACCGAAAATCAAATCCTAATGCAAAGCCGGAGCAGAAAATCTTTCGAAATATGTGTATGGATAGGAATCTAGGGAAGTTTGATACAAGTTGGATGAGTGATTATTCTACGGAACATGTTATCAGATTCATGCTCACTCCGAACGTGTATGATTTTGAAATTATAGAAGCTTTGGGTAAACTGGACCCAACAGATGTAGAATCAACATTCATGTTCGCTCAACTTTGCTTTGAATATGCTGGAAAACGATTTCAAGGAAACATTTTGCAAATCACTGATCGTTTTCAACAAGTCCTGTCAAATGATCTACATCTCTATTACACTAAC…	YTLFSIPPGKFVYQCLGLFYFFLYPPVLHFLISLDFFSNNSKKPNMDPGLVCRICELQADGTHFGVVTCRACAVFFRRSTTSKWIKRKCMARSEDKLVCSCKPCRLRKCIENGMDSSKFQYNRDTIPKKPKARPIISYYVGRPEFLIFFDDSNVTTQKTFIDIIIVQAIWHVW	Z003_14823	Caenorhabditis_elegans	T27B7.5	zf-C4	zf-C4
249	16A10	pTH9930	TGTCACGGACCTACGGCGCGCCCATTTTAATCAAGCGGATCTACTGAAC	TAGTGCACCACAATCCTGCAGGGGTCTGTAAGAGAACTAATGTTGAAAC	CATTTTAATCAAGCGGATCTACTGAACTTCCATCAGAATTCTCTCCTGCCACATCATATGTTTTCACAATTTGGAAGATATCCACAGTTCGAACAAAAGCCGGACGTGGGGGTGCTTCAGCAACAGATGCAGATGCGGGAAGCAAAACCTTACAAGTGCACGCAGTGTGTCAAGGCATTTGCCAACTCATCCTATCTCTCCCAACACATGAGAATTCATCTTGGCATCAAGCCATTTGGGCCATGTAACTATTGCGGCAAGAAGTTCACTCAGCTATCACACCTTCAGCAGCACATTCGAACACATACAGGAGAGAAACCGTATAAGTGCAAATTCACGGGATGCGACAAAGCATTCTCCCAGTTAAGCAATCTCCAATCTCACTCTCGATGCCATCAA…	HFNQADLLNFHQNSLLPHHMFSQFGRYPQFEQKPDVGVLQQQMQMREAKPYKCTQCVKAFANSSYLSQHMRIHLGIKPFGPCNYCGKKFTQLSHLQQHIRTHTGEKPYKCKFTGCDKAFSQLSNLQSHSRCHQTDKPFKCNSCYKCFTDEQSLLDHIPKHKESKHLKIHICPFCGKSYTQQTYLQKHMTKHADRSKASNFGNDVVPADPFDPSLLSWNPMQGMGDNAHDSSSFNISSLTDQ	Z003_15195	Caenorhabditis_elegans	W03C9.4	zf-C2H2	zf-C2H2
250	16B04	pTH9931	TGTCACGGACCTACGGCGCGCCTTGCCGAATGTAATCCCAACAAA	TAGTGCACCACAATCCTGCAGGCTTGGCATCTAGAAGGCGTTG	TTGCCGAATGTAATCCCAACAAATAAGACAAATGCTGAGCCGAAACGACCATCTCGTCCAGTGAATATCACTTCAAACATGAATAGATACAAGAAAGAGCACACAGTTGCAGTCGAATGGTTAGCCGACAAACGTGTATGGGCAGCTGGAGTTTATTTCGTTCATCGTGTTAACTCGGATATTCTCTTTAAACGTCTTAATCAGAATGTATCAAGACATCGATCACTTGAGGTTACCAAGCAAGAAGTGATCAAGAAACTGTCTGGAGGTGAAGATGATATTGCTATGGATCGTCTTAATATCAGTCTTCTTGATCCACTGTGCAAGACAAGAATGACAACGCCTTCTAGATGCCAAG	RVNSDILFKRLNQNVSRHRSLEVTKQEVIKKLSGGEDDIAMDRLNISLLDPLCKTRMTTPSRCQDCTHLQCFDLLSYLMMNEKKPTWQCPVCSSNCPYDRLIVDDYFLDMLAKVDKNTTE	Z003_15607	Caenorhabditis_elegans	W10D5.3	zf-MIZ	zf-MIZ
251	16B07	pTH9932	TGTCACGGACCTACGGCGCGCCGAGTCGCGGGATGACGGCC	TAGTGCACCACAATCCTGCAGGGCTCTGCAGTGAGATCTTCTTC	GAGTCGCGGGATGACGGCCTGATGCTTCATCATTGGGTTCGGGCCGACAAGGTGGAGGCCATGCAGCCTTACCCATTTTCAAGGTTCAATAAGGTGATTGATATTCCAATATATACCGACGATGAGTATGAAAATTACCTAAAAATCGCAAAATGGTCGCGGGAAGAGACTGATTATCTATTCGACACGTGCCGAATGTTCGATCTTCGCTGGCCAATCGTCTACGACAGATTTGATTGCAAAAAGTTCAATCAAAATCGCACAGTGGAGGATTTAAAAGAGCGCTTCTACTCGATAACCTATGAGCTGGGCATTCTAAGAGATCCAAGCTCATCACCGACGGCTTATGATGCAGAACACGAGCGTCGGCGTAAAGAACAACTGAATAAGCAATGGAAT…	ESRDDGLMLHHWVRADKVEAMQPYPFSRFNKVIDIPIYTDDEYENYLKIAKWSREETDYLFDTCRMFDLRWPIVYDRFDCKKFNQNRTVEDLKERFYSITYELGILRDPSSSPTAYDAEHERRRKEQLNKQWNRTAEQLQEEEDLTAEL	Z003_15735	Caenorhabditis_elegans	Y105E8A.17	Myb_DNA-binding	Myb_DNA-binding
252	16C05	pTH9933	TGTCACGGACCTACGGCGCGCCATGAACATCCCTTGTGCTACTTTG	TAGTGCACCACAATCCTGCAGGTTGCTTTGCTTTTACGTAAAACTGC	ATGAACATCCCTTGTGCTACTTTGCAACTCAACTATACACCAGATAAATGTGAAATTTGTCAAAAAACCGGTCACGGACACCATTTTGGCTTGGAAACTTGTCGGGCATGCGCCGCATTTTTCCGACGTACAGTAGTTTTGAATCGGAAATACAAATGTGCTCAGAAATCTGGAAAATGTGATGTTGGAGCGGAGAAGGCTACTTGCAAATTTTGTAGATATAAAAAGTGTATAGACTTAGGAATGACTACTGATAATGTCCGTGCTGAAGATATTACTGAACAAGAACCGGCGTCATCACATTTACCAGAAGCTCAGATTTTGTATACGATTAGCTCAAAATCACGTGGTTCAAGCCTTTTGGTTGATGTAAATGCAGTTTTACGTAAAAGCAAAGCAA	MNIPCATLQLNYTPDKCEICQKTGHGHHFGLETCRACAAFFRRTVVLNRKYKCAQKSGKCDVGAEKATCKFCRYKKCIDLGMTTDNVRAEDITEQEPASSHLPEAQILYTISSKSRGSSLLVDVNAVLRKSKAI	Z003_16037	Caenorhabditis_elegans	Y17D7B.1	zf-C4	zf-C4
253	16E12	pTH9934	TGTCACGGACCTACGGCGCGCCGCTCATTATTCGAATTTATCACATTTT	TAGTGCACCACAATCCTGCAGGAATCCGGGTCCAAAATCTCTGT	GCTCATTATTCGAATTTATCACATTTTCATCCTAGAAATCCAGAATTTTCACAAGAAATCGTGGAAAATCGAGTAATTTCTCCAAAATCTGAGCATCCGGAAGAAATAGAGGATCACGAAGATGATGAGGATGGCCAAAGTGAAATGAAGCACAATTGCCCGGAATGCCCGAAAAAGTACACATCGGAACGACGTCTCAAGCATCATATCGTTGTACACCGCAATCCGGACGCCTATAAATGTCAAAAATGTGGATATTGCTATCAGAGCCCAGATAGTCTCCGGAGACACTGGAAGAAAACTCCGAATTGTGACGAGTTTCCGCCGAAGATTAATGTGAAAACAGAGATTTTGGACCCGGATT	AHYSNLSHFHPRNPEFSQEIVENRVISPKSEHPEEIEDHEDDEDGQSEMKHNCPECPKKYTSERRLKHHIVVHRNPDAYKCQKCGYCYQSPDSLRRHWKKTPNCDEFPPKINVKTEILDPDS	Z003_17712	Caenorhabditis_elegans	Y53H1A.2	zf-C2H2	zf-C2H2
254	16F07	pTH9935	TGTCACGGACCTACGGCGCGCCATGGCACGACACAAATGTCAA	TAGTGCACCACAATCCTGCAGGAATGTACTGTAGCCACGTGGT	ATGGCACGACACAAATGTCAAGACTGCGGGAAAACGTTTGATTTAAAACGATATCTAACAAAACATGAATTACGAATGCATAAAAATGTTGTGAAATCGAAGAATGACAGAAGCGCTTCAGATCCACTGAAATGTAGTATGTGTGATAAAGTATTTCCACGTCTTTCTCATCTTCAGCGTCATCAAATGACACATCTTAATGTCAGAAATTATTCATGTACATTTTGTGAAGAGAAGTTCGTACAAAAATCACATTTAACTCGCCACGTCTCTCGAAAGCATTCGAATGCTCCTGGAGTAGAAGTTGACTGGACAGCGTGTGACAAATGTGGGCAATTATTCAAGACTACTTATGAAATGAGAATTCATCGACAGACATATCACGAACTTCACAAATGT…	MARHKCQDCGKTFDLKRYLTKHELRMHKNVVKSKNDRSASDPLKCSMCDKVFPRLSHLQRHQMTHLNVRNYSCTFCEEKFVQKSHLTRHVSRKHSNAPGVEVDWTACDKCGQLFKTTYEMRIHRQTYHELHKCKQCQEVIEAGSDGLRKHHMQCRKYSNVCDECGASFSRPADLVSHETSCLKKFAFVCKPCDSYFRQRVQLDRHIKKAHFHPTKCSKCEQISDTPVQNSRHSLECVKVIICGYCSLKNPDKNHVATVHW	Z003_18167	Caenorhabditis_elegans	Y5F2A.4	zf-C2H2	zf-C2H2
255	16G07	pTH9936	TGTCACGGACCTACGGCGCGCCGGACAACCGTATCAATTCACAGC	TAGTGCACCACAATCCTGCAGGACATTAGATAAAAATTCACATTTATGA	GGACAACCGTATCAATTCACAGCTAACTACTCCATTCCAAGTCTCGATGGAAATTTAAGTGATATCACAATTCCAACGACGGCTGGAAGCAGTGCGGCAACAACTCCGAACGCTGCAATGCATCTTCCGTGGGCAATCTCACATGACGGGAAGAAGAAGCGACAACCGTACAAGAAAGATCAGATATCAAGACTTGAGTACGAGTATTCTGTCAATCAATATCTCACGAATAAGCGGAGATCAGAACTCTCTGCACAATTGATGCTTGATGAGAAGCAGGTCAAGGTCTGGTTCCAGGTATGTTATAGGCAGTATTCAGCGGAAAGTCTAGAGATCATAAATGTGAATTTTTATCTAATGT	GQPYQFTANYSIPSLDGNLSDITIPTTAGSSAATTPNAAMHLPWAISHDGKKKRQPYKKDQISRLEYEYSVNQYLTNKRRSELSAQLMLDEKQVKVWFQVCYRQYSAESLEIINVNFYLMS	Z003_18807	Caenorhabditis_elegans	Y75B8A.2	Homeobox	Homeobox
256	13G06	pTH9944	TGTCACGGACCTACGGCGCGCCAATACCGGCGGAACACCAT	TAGTGCACCACAATCCTGCAGGCAGTCATATTTGTATGATCTTCAATTG	AATACCGGCGGAACACCATCGCCTCATTCAAGCTCTCTGCCAACGTCACCCCCGCAGTTGCAAGGCTTCTTAAGATCCTTCCTCAACCCCGACAACCTCTCCACACCAACCTCATTCGGTGTCCCATCGGAAACAGCTCTTGACGCTGACAAAATGTGCGCTGTGTGCAATGATCGAGCTGTTTGCCTGCACTATGGAGCCAGAACTTGCGAAGGATGCAAAGGATTCTTCAAGCGAACTGTGCAGAAGAACTCCAAATACACTTGCGCTGGTAACAAGACCTGCCCAATCGACAAGCGATACCGTAGTCGGTGCCAGTACTGTCGCTATCAAAAGTGTTTGGAAGTCGGCATGGTCAAAGAAATTGTTCGACATGGTTCTCTATCGGGGAGACGTGGA…	NTGGTPSPHSSSLPTSPPQLQGFLRSFLNPDNLSTPTSFGVPSETALDADKMCAVCNDRAVCLHYGARTCEGCKGFFKRTVQKNSKYTCAGNKTCPIDKRYRSRCQYCRYQKCLEVGMVKEIVRHGSLSGRRGRLSSKTKLARSEDQPSPPLPLLALMGKAIEDHTNMTV	Z003_3875	Caenorhabditis_elegans	C48D5.1	zf-C4	zf-C4
257	14B08	pTH9945	TGTCACGGACCTACGGCGCGCCAGAAATCATCGCGATTTTAGACCG	TAGTGCACCACAATCCTGCAGGTAACCAGCGGAATGTTAATGAGC	AGAAATCATCGCGATTTTAGACCGATCGACGAAAAGGATTTCTCTAACATTCGGCAAAGCATTTCCAAAAGGTTCGAGCATTCGAAAAATAACATTCGCGGGGAGGCAGCAACTAAAATTCTAGTTCTCCGGAGGGAGATCGAGCAGCAGGGACGCAAGCGCCGGAACTTTGACAAAAACACGACGGACATTTTGCAAAACTGGTTCCACGATCATCGTCAAAATCCTTACCCGTCCGACCAGGAAAAGGCGGAATTAGCAAAACAGTGTAATATCAAAATTTCACAGGTTAACAATTGGTTTGGAAATCAACGAATTCGGACAAAACAACAAGCTTTGCGTATGCAAGAAGATGAACGTGAAAGAGCTGCATCAATGGCTAACGAAGCACAAGCAATT…	RNHRDFRPIDEKDFSNIRQSISKRFEHSKNNIRGEAATKILVLRREIEQQGRKRRNFDKNTTDILQNWFHDHRQNPYPSDQEKAELAKQCNIKISQVNNWFGNQRIRTKQQALRMQEDERERAASMANEAQAIQNSLNSSTVASSSNMSTSGLINIPLVN	Z003_6302	Caenorhabditis_elegans	F22A3.5	Homeobox	Homeobox
258	14H10	pTH9946	TGTCACGGACCTACGGCGCGCCGCTGCACTGAATTTCATCGATCC	TAGTGCACCACAATCCTGCAGGTGTGATCCTTGATATCGTTCCAGT	GCTGCACTGAATTTCATCGATCCATCTGCCGAACTTGACAAGTGTATAGTTCGACAAAAGCAGCAAGACTTTTGTGCTCCGGATCTCAACATGGTTCCTGCGTCCTCACTGAGCATCGATGAAATTCGAAATGCCGTCCGTAAAAGCATGTTCCGATGCAAAGTCTGCAAAAATCGTTTCGGTGAGATGAGCCTTCTCGAGCGACATCTCAGAGATTCCCACCCGAAAGCCTACATTGCATTTTTGGAAAATCAACGTGAAATGGCTGATTATATGGGTGAACTGGAGAGAGAGCGTAACCGAATCGAAGAGCTTGTGAGTGGCGGATTCATTCCTCCAGAGTCGGAAATTGAGGCGACATCGAACAATCTGGAAGTGGACTCGATCCCGTTGCCGGGT…	AALNFIDPSAELDKCIVRQKQQDFCAPDLNMVPASSLSIDEIRNAVRKSMFRCKVCKNRFGEMSLLERHLRDSHPKAYIAFLENQREMADYMGELERERNRIEELVSGGFIPPESEIEATSNNLEVDSIPLPGENSQGHIPRLNRYGGLMYPMDALRKKFPYLKKRSPQCPFCDKRFRNDISFNNHLTKKHPECAEFVQCLHCFKCLPSAADLPTHDCDLTYLCLDCRPIRNMCNGYRLFRHRTKFHRGYHSGFRCPDCNQKFLTPRKLRKHRKMAHVFSRTFQCHFCEEFFISDTAVTIHERVHTGILKFECTVCDFRASRYLQMEEHTKEHHGYMCSVCQLKCQHWNDIKDHM	Z003_9847	Caenorhabditis_elegans	F58G1.2	zf-C2H2	zf-C2H2
259	15A01	pTH9947	TGTCACGGACCTACGGCGCGCCATGGATATGGAGAGAGCAGCTAC	TAGTGCACCACAATCCTGCAGGTGTCAGAGAGAATTTTTTGTAGTCCTT	ATGGATATGGAGAGAGCAGCTACTTGGTTGACATATTTTGATGAATTTTGCACTTTGAAATCTGAAGAAAAGATGCTTATAACAAAATGTATGTGGTTGTTGTTCCGAAGATTAGAACGCAGTGCAATGACAGCCGATTTGAGACGGGCGAAAAAATGTCAAAAAAGTGAATATGCAATGAAAACTGACTCCCTTGTAAGCATGGAAACAAAATATGAATTTGATTGGCTTTCCCATTTTTCGGCAGAACAAATAAAAGTTTTTCTTGGAAGCTCTTCTGGAATGTATTGTGAAGAATTGACAAATTGTATCATGGAAGTTCAACCATCAGATGAGGAACTTTGTTTTATCATATGTGACCTTTGCTTTCAATATCTTGGTATAAAAGTAGGAGGAGAA…	MDMERAATWLTYFDEFCTLKSEEKMLITKCMWLLFRRLERSAMTADLRRAKKCQKSEYAMKTDSLVSMETKYEFDWLSHFSAEQIKVFLGSSSGMYCEELTNCIMEVQPSDEELCFIICDLCFQYLGIKVGGEIQQKLEGLQKILSDN	Z003_9998	Caenorhabditis_elegans	F59E11.10	zf-C4	zf-C4
260	15A07	pTH9948	TGTCACGGACCTACGGCGCGCCTTTCAAGCTCAGCAAGCAATGG	TAGTGCACCACAATCCTGCAGGCAACTTGTCCTGCATATTTATCCATAT	TTTCAAGCTCAGCAAGCAATGGTCCAATTTCATAATCAACAGAAACAACAGCAGCAGATCATACAGCAACAGCAACAGCAGCAGCAACAGCAGCAACAAAATCAGAATCCGAGTCAAAGTCAGTCTTCTTCCAGTGACCGTAAGAGGTCCTATCCCTGTACATTTCAATATTGTGTCATATGTCAAAAAGACGTACACTCCTCAAAACTGCCATGCCATATTCGACAATGCCACGTGGCTAAGCCAATGTTCCAATGCCCGGCATGCGACTTTACATCCACATATTCAAAAAACAACGTTAAGAGTCATATGGTTTCATTACACGGATTAGCGGGTGACCCGATCAGTTATATGGATAAATATGCAGGACAAGTTG	FQAQQAMVQFHNQQKQQQQIIQQQQQQQQQQQQNQNPSQSQSSSSDRKRSYPCTFQYCVICQKDVHSSKLPCHIRQCHVAKPMFQCPACDFTSTYSKNNVKSHMVSLHGLAGDPISYMDKYAGQVE	Z003_10392	Caenorhabditis_elegans	K01B6.1	zf-C2H2	zf-C2H2
261	15G07	pTH9949	TGTCACGGACCTACGGCGCGCCCCGCGAAAAGGATACAAGCC	TAGTGCACCACAATCCTGCAGGGATAGTACGTAGATTTGCTAAACTTGT	CCGCGAAAAGGATACAAGCCTCGTCCATCGTGTCCAGAGCCTAAAGATGCTCACCTCATCCCACTGGCACACTTGACTCCTCTTCCAGATCGTTACTTCCAGCGACGTCTTACAATTACTGCGTTCCAAGCCGGATTCTCGTCTGAATGTGTTTCGTGCATGTATTGCAATTTTGTCTTCAGGCAAAAAGCCTTGCTAGAGTCCCATATCAAAAAGCATACAACGACTGGTAAAAATGAAGTGATGAGTGAATCGTCCGGATTGATCTGCCCAGTTGAACATTGTACAATCCGTTGTGATTCGATTGCTACTGTCGTGAGGCACATGCAAGTGACCCATTCTGTCAATAACATCGCGTTTGAACGTGTCGTATTCAAAAATTTCCACGAGTTCAAGATG…	PRKGYKPRPSCPEPKDAHLIPLAHLTPLPDRYFQRRLTITAFQAGFSSECVSCMYCNFVFRQKALLESHIKKHTTTGKNEVMSESSGLICPVEHCTIRCDSIATVVRHMQVTHSVNNIAFERVVFKNFHEFKMWRTELERLTMSKFSRTSGKTNKFSKSTYYQ	Z003_14215	Caenorhabditis_elegans	T20F7.1	zf-C2H2	zf-C2H2
262	13A01	pTH9951	TGTCACGGACCTACGGCGCGCCATCGATGAGATCTCGAAGATCACC	TAGTGCACCACAATCCTGCAGGGGGTGACCTTCGTTGGAGT	ATCGATGAGATCTCGAAGATCACCATCGACAATCACAACGACGATACCATGAGTGCTGAGAAGGAAAATCGTTTCAATAAGAATCGTGTTGAGAAATTGGGTCGCCGTGGGTTCGCCAAACCAGAAGTTGACAGCCAACTGCCACACAACTTTAAGACTCGTCTTTGCATGACGCACGCAGCTGGAATTAATCCTTGTGCATTGGGTGCTCGGTGCAAGTTTGCTCATGGGCTCAAAGAGCTCAGAGCTTCTGATATTCCGACTCGTTATCCGAACAATAAATACAAAACTAAATTGTGCAAGAATTTTGCGCGTGGAGGATCTGGAGTTTGCCCATATGGGCTTCGATGCGAGTTTGTTCACCCATCGGATACGGAATTCCAGAATATTCCTCCATAT…	IDEISKITIDNHNDDTMSAEKENRFNKNRVEKLGRRGFAKPEVDSQLPHNFKTRLCMTHAAGINPCALGARCKFAHGLKELRASDIPTRYPNNKYKTKLCKNFARGGSGVCPYGLRCEFVHPSDTEFQNIPPYQRKMVEEHDSIPEDYVVARYQPRFMHTSGKATTPTKVTL	Z003_38	Caenorhabditis_elegans	AH6.5	zf-CCCH	zf-CCCH
263	13C11	pTH9952	TGTCACGGACCTACGGCGCGCCATGTCCGGCACCACAATATCT	TAGTGCACCACAATCCTGCAGGATCGGGTCTCATTCAAAGCATG	ATGTCCGGCACCACAATATCTTCGGATCGCCCCAACATTTGCGCCATTTGTCACCAAAAAGCTTTCGGCTACAATTATGAGGTGGTGTCCTGTAACGCGTGCAAAATGTTCTTCCGGAGAGCACACGCCGAGAAAATTGACGATTTTTGCAAAAAGGGCGGAAAATGCTTCGATGGTGATGACTTGTTAACATCCCGTCCAAAATGCCGATCATGTCGATACAAAAAATGCGTGAACCTCGGCATGCGCTATCACAACTCCTCCGAATCGCAAACCCAGTCCGACGAGGAACCATCTCCTAAACAATCCGTCGTCGCCGTAGTCCCACAACATATAATCACACAGGCGCACATCGATTCGACGTTTTTCCAACACCTTCATGCTTTGAATGAGACCCGAT	MSGTTISSDRPNICAICHQKAFGYNYEVVSCNACKMFFRRAHAEKIDDFCKKGGKCFDGDDLLTSRPKCRSCRYKKCVNLGMRYHNSSESQTQSDEEPSPKQSVVAVVPQHIITQAHIDSTFFQHLHALNETRY	Z003_2019	Caenorhabditis_elegans	C17E7.8	zf-C4	zf-C4
264	13F08	pTH9953	TGTCACGGACCTACGGCGCGCCATGTATGCCAGCAAACGTCG	TAGTGCACCACAATCCTGCAGGGTGTTCCAATTCGTAGATCAAAGATTG	ATGTATGCCAGCAAACGTCGCCAGCGGAACTTCAAAAGGGTACGGGATCCGCCGAAGCAGTTGACTAACACCAATCCGTCGAAACGGCACAGAGAACGATTAAATGGAGAACTTGAGACGGTTGCTATGCTTCTTCCTTACGACAGCTCTACCATCAGCCGTCTGGATAAACTCTCCGTGCTCCGACTTGCAGTCAGCTTTCTTCAATGCAAAGCTCACTTTCAAGCATGTCTACACAACTCTCAGTTCCTGTCAGCTGGCTTTCCAATGTCAACTCATTCGTATTCTTATCAACCACACCCTCCTATACCATTTTCAAACAAAGTTCCAACAATCTTTGATCTACGAATTGGAACAC	MYASKRRQRNFKRVRDPPKQLTNTNPSKRHRERLNGELETVAMLLPYDSSTISRLDKLSVLRLAVSFLQCKAHFQACLHNSQFLSAGFPMSTHSYSYQPHPPIPFSNKVPTIFDLRIGTP	Z003_3461	Caenorhabditis_elegans	C41G7.5	HLH	HLH
265	15B08	pTH9954	TGTCACGGACCTACGGCGCGCCATGACTAACTACGCAAGTATTGCTAAT	TAGTGCACCACAATCCTGCAGGCATCCACTAAAGAAGGGTCCTCA	ATGACTAACTACGCAAGTATTGCTAATTTCAAGACCGAGGAAAGTGTTCTTGTAAGAGAAAAGTGTGTGATATGTTTTGGATCGGCGTTGGGGATGAATTATGGGGCATTGACTTGCTCCGCGTGCAAGATGTTTTTCCGAAGATCTGCTGAGAAAAAATTGAGCTACAACTGCAAGAAGGACAATCAGTGCTCAATTGCTCAACGGAAATGCCGAGCTTGTCGTTTTCAAAAATGCCTGAACTTTGGCATGACATTTTACTCATTCCGGGGACAACTTGCTCAAAATTTTAATAATCTCGATCAGAAGCTGGAGCTCCTTTTAAAAGAGCTAACAATAAAAGATGGGAAAAACTACACAAAATTCATCAACTACTACTCAAATGAGGACCCTTCTTTA…	MTNYASIANFKTEESVLVREKCVICFGSALGMNYGALTCSACKMFFRRSAEKKLSYNCKKDNQCSIAQRKCRACRFQKCLNFGMTFYSFRGQLAQNFNNLDQKLELLLKELTIKDGKNYTKFINYYSNEDPSLVDV	Z003_10804	Caenorhabditis_elegans	K06B4.8	zf-C4	zf-C4
266	15B09	pTH9955	TGTCACGGACCTACGGCGCGCCATGTCTTCTTATCATCCATCAACAACA	TAGTGCACCACAATCCTGCAGGTTCCAGAAATTTGATTTAATTCATTAT	ATGTCTTCTTATCATCCATCAACAACATCTGATGTCTTCTGGACAACAACACCATCGTCTACTTCAACGACTCCAAGCTCTGATAATGGAATTCAACAATATTCGTCGATATCTACGTCATCGGGTTACGCCCCTGCCAACTCTCCTGCCAAAACTGCCGAAGTTAATCAACTTGGTGGAGTTTTCGTAAATGGAAGACCACTTCCATTTGAGATGCGTTGTAAAATAGTTGAGCTCTCGAGACAAGGAACACGACCGTGTGACATCTCTCGTCAACTAAAAATCAGTCATGGATGCGTTTCGAAAATATTGACTCGGTTCTCAGAAAATGGAACAATAATGCCTGGAACAATTGGAGGATCTAGACCGAGAGTTACTACGCCTAAAGTTGTTGAATAT…	MSSYHPSTTSDVFWTTTPSSTSTTPSSDNGIQQYSSISTSSGYAPANSPAKTAEVNQLGGVFVNGRPLPFEMRCKIVELSRQGTRPCDISRQLKISHGCVSKILTRFSENGTIMPGTIGGSRPRVTTPKVVEYIRSLKRSDPGIFAWEIRDRLISADICDRANLPSVSSISRILRNKNGGNSSSSSSSQLRYIRDQLAEQQQQQHLQQHQYMEYNNNELNQISGN	Z003_10881	Caenorhabditis_elegans	K07C11.1	PAX	PAX
267	15D03	pTH9956	TGTCACGGACCTACGGCGCGCCATGGTGGAGCATCGGGAAC	TAGTGCACCACAATCCTGCAGGTTTCGATGATCTCAAAGGAAGAATCG	ATGGTGGAGCATCGGGAACGACTTGAGGCAACCCAACTCAAAGCGGAGGAAAAAGCCGCGATTGAAGGGAAACTTCAGAAAACTAATGCAGTGAAAGTTCAAATTGAAAAGAATGATGGAAAACGGAATAGAAAAAATTCTGGAACTTGTGATCTATGTGAGAAGAACTTCAAAACATCGGAAGAATTGGTGGAACATAAGAAAAATTATCCAAGAGCGGATGTTGAAAAAGCATTGTCTGTTTATAAGGAAAAGGACACTATTTACAAGTGTCTACAATGTTCCGGAGAGTTCCGTCTTAAGGAAGATTTTGATTACCATCAAGAATTGCATAAAAGACTTGGAGAATTAAAAAGCGCTTCCAGTAACAAAAGTGAAGCCAACAAGGACGACGAAAGT…	MVEHRERLEATQLKAEEKAAIEGKLQKTNAVKVQIEKNDGKRNRKNSGTCDLCEKNFKTSEELVEHKKNYPRADVEKALSVYKEKDTIYKCLQCSGEFRLKEDFDYHQELHKRLGELKSASSNKSEANKDDESDIDSSFEIIEN	Z003_12205	Caenorhabditis_elegans	R07E5.5	zf-C2H2	zf-C2H2
268	15A11	pTH9957	TGTCACGGACCTACGGCGCGCCAAACAGAACATCACGATGGATTTG	TAGTGCACCACAATCCTGCAGGACTCCAACACATTCAAAGCCTG	AAACAGAACATCACGATGGATTTGCTACGATCACCCATCCAGATACCATCAGCATCGGACACAATCAAAATCGAAACACCGTCTACAATTTCATCCCAACCATCTCCCATCCAGACACCCCTCGCAGCAGCCTCATCGGACAACTTTGAAAGACCGTCACTATCGTACAAAGACCTCATCATTGAAGCAATCGACAGAAGTCCTGAAAAACGATTGAAGCTCAATGAAATCTACCAGGTAATCCGATTGCTGCACCCATACTACAGACATCGACCAGATCAATGGGGATGGCAAAACTCGATCCGACACAATTTGAGTCTTCACGATTGCTTTGTCAAGTTGCCTCTCAAACAGACTTCTGCCAGCGGAGTTGTCGGACACTTCTGGACCGTTGTTCCT…	KQNITMDLLRSPIQIPSASDTIKIETPSTISSQPSPIQTPLAAASSDNFERPSLSYKDLIIEAIDRSPEKRLKLNEIYQVIRLLHPYYRHRPDQWGWQNSIRHNLSLHDCFVKLPLKQTSASGVVGHFWTVVPELSDKQTLRRRNRQQPRALAKKSDAGRTLSRDDRGSSGSGETSPSPSQPSISPPNENPMPSVQALNVLEL	Z003_10587	Caenorhabditis_elegans	K03C7.2	Fork_head	Fork_head
269	16A12	pTH9958	TGTCACGGACCTACGGCGCGCCGACTCGCTGGCAATGTTCG	TAGTGCACCACAATCCTGCAGGGAGCCGAGACCATTTGCTTC	GACTCGCTGGCAATGTTCGAATCACTTTTAGCCGAGTCGATGAACGGGAATGTGCTCGATGCGAATACCTCGTCAGCTGACCAGAAAGCGGCGGCTCGCAAGCGAAAGAGCACACCGATGAAGGTTCCGAAGTCGGAAAATGGTGCTGGATATATTTGTCCGATGGATGGATGTAATAAGGTGTTCAAGGAGAAAGGATCAGTGCATCGACATTTTGTTACGCATATTGGAATGCGTTTTAATTGTGACAAATGCAAGGCCTCGTACACCCAAAAGCATGCTCTAATGCTCCATCAGAAGATTCATGCCAATCCGGACGCCTATCAGTGTAGAGGATGCGGTACCAATTATACAACACAAAATGGTCTTCGATTGCATAGACAGAGAAATCCAGCATGC…	DSLAMFESLLAESMNGNVLDANTSSADQKAAARKRKSTPMKVPKSENGAGYICPMDGCNKVFKEKGSVHRHFVTHIGMRFNCDKCKASYTQKHALMLHQKIHANPDAYQCRGCGTNYTTQNGLRLHRQRNPACMEVSNALEFNTSLNTSISEALSGPLSKNSSPTKQMVSAP	Z003_15439	Caenorhabditis_elegans	W06H12.1	zf-C2H2	zf-C2H2
270	14F01	pTH9969	TGTCACGGACCTACGGCGCGCCGGAAATTTTCCATTCGGATTTCTCAA	TAGTGCACCACAATCCTGCAGGCGAGCAGCTCGGCGGGTAA	GGAAATTTTCCATTCGGATTTCTCAACGCTCCCATGTTCTGGCAGCAATACCTGAGGAGTATGGCAATGGGTATCATCCCTCAGAACCCTGAATCACCATCAGCTTCAGTTTGGAATCGAACACCGACACCTCCAGTGGAAATCAAACCGTTTCATTGCCAAAAATGCACAAAATTATTTTCTACCATAGCTGCTCTAGAGCAACACCAACAAGTACACGTCAGCGATAAGCAATTTGAGTGCAAGCAGTGTGGAAAAACCTTCAAAAGATCTTCCACCTTATCTACACACCTTCTGATTCACTCCGACACAAGGCCGTATCCATGTGAATACTGTGGAAAAAGATTTCATCAGAAGTCGGACATGAAAAAACACACATATATTCATACAGGTGAAAAA…	GNFPFGFLNAPMFWQQYLRSMAMGIIPQNPESPSASVWNRTPTPPVEIKPFHCQKCTKLFSTIAALEQHQQVHVSDKQFECKQCGKTFKRSSTLSTHLLIHSDTRPYPCEYCGKRFHQKSDMKKHTYIHTGEKPHKCTVCGKAFSQSSNLITHTRKHTGFKPFACDVCGRTFQRKVDRRRHRESHHPGHPEECVSASQISSDLSPKGYMTPPTSNGYLDSSDEFLNVFRLPAELLA	Z003_8277	Caenorhabditis_elegans	F45B8.4	zf-C2H2	zf-C2H2
271	13H10	pTH9974	TGTCACGGACCTACGGCGCGCCATGTCTTCGGAATCACCGCC	TAGTGCACCACAATCCTGCAGGATGTGATGCAGTCTACTGAGAAG	ATGTCTTCGGAATCACCGCCTGGAGCCGAGGAAGAATTCGAGCCATATGTGAGAAGAAAACGATCGGAAGCAGGAGGCCGGAAGAAAATGCAAGGCTTGAATGAGCAAGAACAAAATCTGTTGAGAAACTCAATTAACAGTCGAGAACGTCGTCGAATGCACGAGTTGAACGATGAATTCGAGACTCTACGTGAATGTCTTCCTTATCCGAATGAAGCGAACAGTCGACGAATGAGCAAAGCGAATACATTGTTACTAGCTTCCAATTGGATTAAGCAACTTGCAAATGCAAATCACAAGCTTCAAATGGAATTAAACATGGCAAATGCAAAGATCGACTCCCTCATGGTGCAACTTAAAAAAGTGGAAAAACCATCTTCAAAATGCTCAAAGTGTCAA…	MSSESPPGAEEEFEPYVRRKRSEAGGRKKMQGLNEQEQNLLRNSINSRERRRMHELNDEFETLRECLPYPNEANSRRMSKANTLLLASNWIKQLANANHKLQMELNMANAKIDSLMVQLKKVEKPSSKCSKCQQNVCFSVDCITS	Z003_4683	Caenorhabditis_elegans	DY3.3	HLH	HLH
272	14F02	pTH9975	TGTCACGGACCTACGGCGCGCCGTGGATTCTTCATCTTCTTCCTCAG	TAGTGCACCACAATCCTGCAGGCAATAGTAATGATCTCCTGTTTTATGC	GTGGATTCTTCATCTTCTTCCTCAGATGCTTCGGATGAAAGTTTTGTGGCATGCCCAGTTGAAGCAAAGCGACGTAAGAAGAAGCTGACTAATTCTAGAAAATCGACCTCCGAATTGCCAGAAAAGAAGAAAACCGACAAAGTTAACCTGCAAAGGCCCGATATCAAAAAAGCGTTGTTCGAGCATTTTGAGAAGAATCCGAAGCCAGAGTCCGAGTCTTTGCAAAAGATATCTGCACAACTAGGTTTGACTCAACAGCAAGTGACAGGCTGGTTCAACCGGAGAAACGGGACTTATCTAATTAGTGGGCCGCACAACTCGGTGTCAAAGGCCGATCGTAAACTCTCACACATGACCAAAAAACTCGGTGAAAGAATCATGGAAAAGTTCGAGAGTGAT…	VDSSSSSSDASDESFVACPVEAKRRKKKLTNSRKSTSELPEKKKTDKVNLQRPDIKKALFEHFEKNPKPESESLQKISAQLGLTQQQVTGWFNRRNGTYLISGPHNSVSKADRKLSHMTKKLGERIMEKFESDDLPSVELKEQWAQELRTTVQKVHVLLYKTRAEVMKSYLNGERADLPRKMKAILEAEYDKSDGVDDVHIRECKDQCELSYSLIEEYFQMRRKAEQKAQENSVAQEVAHREVAQQEVVQQDQDGPGSHQEVAQDQEIAEQSAVVAKTSIVVQEVAEQGSEQELDHPLLVENLETICHRDNIRLFTDFHQKRKHPSHADFQNLSRQTGRSVELIRHWFSLKNESQEPEKTTSVSRISPIPVEDAKQQVMELLKTDSNPSVYLKRQWAEQ…	Z003_8284	Caenorhabditis_elegans	F45C12.15	Homeobox	Homeobox
273	13A10	pTH10006	TGTCACGGACCTACGGCGCGCCATGACGTCTAAAACGAATATGACGTC	TAGTGCACCACAATCCTGCAGGGATCAGAAGGAAGTGAATATGCAAAAT	ATGACGTCTAAAACGAATATGACGTCAAACAAATTTGCATATGACTTCTTTCCATGGTCAAATGACACCAATTCGTCCCAACAAATTAAGAACATCAAACCGCCACCGAAAAGGAGCAATCGACCGACTAAAAGAACAACTTTCACATCGGAGCAGGTCACACTTTTGGAGTTGGAATTTGCAAAGAATGAATACATCTGCAAAGACCGACGCGGCGAGTTGGCTCAAACAATTGAACTCACTGAATGTCAAGTGAAGACCTGGTTTCAGAACCGGAGAACTAAAAAACGAAGATGTACATCTCCTCTTCGAAAAAGCATGATGAAGAAGTCTGACGAACGTTCTCCTTCGCCACAAAATCCATCGTCTCAGCATGTTCAGAATTTGCAAACGTTTTTC…	MTSKTNMTSNKFAYDFFPWSNDTNSSQQIKNIKPPPKRSNRPTKRTTFTSEQVTLLELEFAKNEYICKDRRGELAQTIELTECQVKTWFQNRRTKKRRCTSPLRKSMMKKSDERSPSPQNPSSQHVQNLQTFFHSWPSHFAYSLPSDQ	Z003_736	Caenorhabditis_elegans	C02F12.10	Homeobox	Homeobox
274	13B02	pTH10007	TGTCACGGACCTACGGCGCGCCTTCGAGACGCCTTCATCCTC	TAGTGCACCACAATCCTGCAGGTGCTCGTACTGGATATCCAACTAC	TTCGAGACGCCTTCATCCTCCACCACAACACCTTCAGTACCTCCTTCCTTCCCACACTCATCAAATCCCAACGCCTATATGAAGCCATCTCCACCATCAGCTATATCATCACCACCATCCACATCATCGTGCTCCTCGGCTTCAGAGAAGAAAGAGTGTGCGGTGTGCAAGAACCCCAACTCCAGTGGATACCATTTTGGGTGTATTGCGTGTGCCGCTTGTTCAGCGTTTTTTCGACGTACCGTAGTGCTTTCGAGGAGGTACTACTGTAGGAGGGATCCAGTTGGCAACTCGCTGTGTCCGCTGGATAGACGACACCGATCAAATTGTCGAGCATGCCGATACGTAAGGTGTATCGATATGGGGATGAATCCGAGCAGCGTCCAAAACCTTCGAGAC…	FETPSSSTTTPSVPPSFPHSSNPNAYMKPSPPSAISSPPSTSSCSSASEKKECAVCKNPNSSGYHFGCIACAACSAFFRRTVVLSRRYYCRRDPVGNSLCPLDRRHRSNCRACRYVRCIDMGMNPSSVQNLRDSIKPRSPAEMIQEAEEEDKKEKLDDILFSAATPGSWISSTST	Z003_1069	Caenorhabditis_elegans	C05G6.1	zf-C4	zf-C4
275	13C06	pTH10008	TGTCACGGACCTACGGCGCGCCAACACTTGGAGGTGTCCAACC	TAGTGCACCACAATCCTGCAGGGAATTCCTTCTTTGACCACTTTCTCT	AACACTTGGAGGTGTCCAACCTGCCAGACAGAAAACGAAACCATGCCTTACAATTATTATTGTTTCTGTGGGCGTATGAGAAATCCTAATTTCCGAGTTGGAGAAGTTCCACATAGTTGCGGAGAGACATGCGGTGGTGCAAGAAAGTTCGGATGTCCTCATCCGTGTACTGAACTGTGTCATCCTGGTCCATGCATTGAATGCAAGCTTTTTACAACAAAATCATGCAATTGTGGAAAGACGAAAAAAAGTGTGAGATGCGGATCTGACCAAGAAGTCATGTGTGAAACAGTCTGCGGAAAGCAACTCTCATGTGGCCAACACAATTGCGAAAGAATTTGTCATTCCGGTGATTGTGGAGAGTGTACTGTAATTCTAGAACAAGATTGTTTTTGTGGC…	NTWRCPTCQTENETMPYNYYCFCGRMRNPNFRVGEVPHSCGETCGGARKFGCPHPCTELCHPGPCIECKLFTTKSCNCGKTKKSVRCGSDQEVMCETVCGKQLSCGQHNCERICHSGDCGECTVILEQDCFCGKTPKEVSCNPCAHEKYSCGSECDGMFSCGIHHCTKKCHDKECGECETGANRIRTCPCGRNTLQSLGVTRKKCTDMVPTCDSVCDKWLTCGTPGKNHHCREKCHEGPCPPCNLNTSVICRCGTSKGVIPCDEYLQIMKTTGEYLCTKRCRKKKSCGMHKCQEVCCIQDEHFCLQMCNKRLSCGIHTCENVCHAGQCRPCLQASFDEQFCHCGHTVRMPPIPCGARLPVCSQPCVRPHSCDHSVSHKCHGEQNCPPCTQLTEKMCYGG…	Z003_1884	Caenorhabditis_elegans	C16A3.7	zf-NF-X1	zf-NF-X1
276	13D05	pTH10009	TGTCACGGACCTACGGCGCGCCATGGAGGAAATTCTACGTCAGTTTC	TAGTGCACCACAATCCTGCAGGTGAACGATTTGATCGGAGCTCT	ATGGAGGAAATTCTACGTCAGTTTCTATCATCCTCAAATCATTCACTCAAAGATTCACCATTTCCAATGATTCCTTTGTCTTTTGATACTTCAATTATGAGCCCAACAGAATGTCAACAGCCAAAACCACAACATTCATATATTGGACTTATTGCAATGGCAATTCTTTCATCACCACAAAAGAAAATGGTTCTAGCAGAGGTATACGAGTGGATAATGAATGAATATCCGTACTTCAGAAGTCGTGGAGCTGGCTGGAGGAATTCAATCAGACACAATTTATCATTGAATGATTGTTTTGTAAAAGCCGGTAGAGCTGCAAATGGGAAGGGTCATTACTGGGCAGTCCATCCTGCATGTGTCAAAGATTTCGAACGTGGAGACTTCAGACGTCGTCGT…	MEEILRQFLSSSNHSLKDSPFPMIPLSFDTSIMSPTECQQPKPQHSYIGLIAMAILSSPQKKMVLAEVYEWIMNEYPYFRSRGAGWRNSIRHNLSLNDCFVKAGRAANGKGHYWAVHPACVKDFERGDFRRRRAQRKVRRHMGLQVEDGDSSDEEGSPGSDPSPPIFPTALWNFNCAPRAPIKSFT	Z003_2340	Caenorhabditis_elegans	C25A1.2	Fork_head	Fork_head
277	13D09	pTH10010	TGTCACGGACCTACGGCGCGCCGCGATGCGTGAAATGAACTTATAC	TAGTGCACCACAATCCTGCAGGTTCTTGAGGAGCATGATCGCT	GCGATGCGTGAAATGAACTTATACTTAATCGCAATGTTTTCATTGGAAAATAATAATATCGAAGAACGCGTCTATCATTCGGCATTATTCTGGACATACCGTGAAGCATTCAAATCGTTCTACTATCCGAAAATGCCCGCTCCAATTCCTCCACAATTTCAGTTGACGCCATCAGAACGACAAATTCTCCGTCGTTATTGGAACGCAGGAAATCGACATGTAACTACAACAGAATGCATTTTTCTAGCAAGAAGATGCCCGAGCTTGGCGCCATTCCAAGTGTACGGGTTTTTTGATAAGCGTCGTAGAAGAGAATATAATAAATATCGTGGCTTGAAAGACGATGAAACTTTGGCTCTGGAGACCACTCAAGTCTGGAAAAAGCTGAGAGAGCTGAAA…	AMREMNLYLIAMFSLENNNIEERVYHSALFWTYREAFKSFYYPKMPAPIPPQFQLTPSERQILRRYWNAGNRHVTTTECIFLARRCPSLAPFQVYGFFDKRRRREYNKYRGLKDDETLALETTQVWKKLRELKGGIDDDESDEDDELLIQREFLSKDDNKKLELLWQVGHRKPSRNECEILAAEMQMDNGEQIFAYFEDRRWHDEYQNRKRSCSSRR	Z003_2468	Caenorhabditis_elegans	C26E1.3	Homeobox	Homeobox
278	13F03	pTH10011	TGTCACGGACCTACGGCGCGCCAGTACAACATCCGACGATTCCG	TAGTGCACCACAATCCTGCAGGATAATTTATTGCATGTCATATCAAAAT	AGTACAACATCCGACGATTCCGATGATGAATCTTTGCATAGATCAAATCAACTTAAACATCTAGAAACTTTATTCAAAGAATCAATTTTACGTACATCATTTTCCCGACCTGGTGTTTCGAACACATCTTGTGATGAAAAATTAGACTTGGTATCCGAAGATGAGAAAAAACGATTAAGAAACACTGAAGCAGCAAGACGGTGCCGAGAAAAGATCAAGAGAAAAACTGATGATTTAGAAACAGAATTGACAAGATTGACTGCTCGTAACGAAGTAATGAACCAACACCGTATTCGTCTTTTGTCACAGGTAGAGGAACAAATGAGAATGTTGGAAAATATAAAGAGCCGAAACCCAGAACTTGAAGCCGAAATTAGATATGAAGCCAAGAAAATTGTG…	STTSDDSDDESLHRSNQLKHLETLFKESILRTSFSRPGVSNTSCDEKLDLVSEDEKKRLRNTEAARRCREKIKRKTDDLETELTRLTARNEVMNQHRIRLLSQVEEQMRMLENIKSRNPELEAEIRYEAKKIVDTYTHQVETKRKAIQDYFDMTCNKLY	Z003_3038	Caenorhabditis_elegans	C34D1.5	bZIP_1	bZIP_1
279	13G02	pTH10012	TGTCACGGACCTACGGCGCGCCTCAGTGAGTTCAAGGCTCAGT	TAGTGCACCACAATCCTGCAGGCATTGGGGCATCGTCGAATT	TCAGTGAGTTCAAGGCTCAGTGAGAGAAAGCTCAAGTACGCAAGTGATCTTCCGACAAGCAGTAATGTTTGTGAGCCAGCCAACTCATTGAGCTCGACGAGGCACCAAACTCTCACCGGTTCTAATGGGGTAAGGCCAGTTAATCGCCAATTCAAATGTGAAATCTGTGAGAAACAATTCGCCAACAAGCCAAACTTAAACCGCCATCGAAAAATTCATTCTGGAACAAAATCCAAGAAGTGCAACATTTGTCAACAAACGCTTCACAGAGAGAATAGGCTACAAGAGCATCTGTACACACATCTCAAAGAACGATCTCATTTCGACTGCCCCATGCTGAACTGTTTTACGCAATTTCGGTCTCATTTGGAAATTCAACGTCATCTCGAGCACCACCAC…	SVSSRLSERKLKYASDLPTSSNVCEPANSLSSTRHQTLTGSNGVRPVNRQFKCEICEKQFANKPNLNRHRKIHSGTKSKKCNICQQTLHRENRLQEHLYTHLKERSHFDCPMLNCFTQFRSHLEIQRHLEHHHLVSPHNLAPCRKCRKHFGTAKYFLIHHYYYHSTDLTSSAPASTCSTRWSPMTVSTSESSSTSESSSGMPTLQDPIRRCPNE	Z003_3735	Caenorhabditis_elegans	C46E10.9	zf-C2H2	zf-C2H2
280	13G10	pTH10013	TGTCACGGACCTACGGCGCGCCATGGAGCCGCCTGGTTGTT	TAGTGCACCACAATCCTGCAGGCCTTGATTACTTGTTTTTTCTCGATTT	ATGGAGCCGCCTGGTTGTTCAAAGGTTTCAAGTGTGGATTCTATAGATTTTGATTTTCCTGAGCTTCCATCAATAATTCAAAAAGAGCCCAACCGCACAGCAAGATCGGAATCCCCAGCACGTCAACGTCACCAGAGACCATCCGAATGTTCAATTTGTGGAAAAACTGCAAATGGATACCACTACGATGTACCATCCTGTAATGGATGCAAAACTTTCTTTAGAAGATTGTGCGTCTCGGAAAAAAGTTTTATTTGCAAAGCCGGCGGGGACTGTTTTAACTTGACAAAAAGAAAAGTTCCACTGAAATGTCGAGCATGTCGTTATGAGAAGTGTATATCAGAAGGAATGAATCCAAATGCAATGCTACTTGACGAAAAAGAAGCGACAGCTGAAAAC…	MEPPGCSKVSSVDSIDFDFPELPSIIQKEPNRTARSESPARQRHQRPSECSICGKTANGYHYDVPSCNGCKTFFRRLCVSEKSFICKAGGDCFNLTKRKVPLKCRACRYEKCISEGMNPNAMLLDEKEATAENFKKLKKRVNQSNPKDPDDDSGEDIEHQIEKKQVIKD	Z003_3984	Caenorhabditis_elegans	C50B6.8	zf-C4	zf-C4
281	13G12	pTH10014	TGTCACGGACCTACGGCGCGCCTTGGAAAGAGGAGAATCTTCAAATGT	TAGTGCACCACAATCCTGCAGGTTGGTTCACGTTTGACTAGGTCT	TTGGAAAGAGGAGAATCTTCAAATGTTCATCCATCAGATGCACATGGATATTTGGGTATGTGTGACTTTGAGGACAGCGACGATACTATGATGCCTGTTCCGAAAAGAGAGATGACTCGACAAAAGTTTCGACGTTTTCGACATAAGGAATATCAATGTGATGAGTGTGATCGTATGTTCACTCTAAAGCACAATTTGCAAAATCACTTTGTTCAGTACCATATGGGATGCAAAACTTTGCACAAAGCTTGCGTTTCTAGCAAGTGCGACATATGTGGGAAGATCTACTCAGCGGTGTCAGTACTAGCTGAACATATGTTGAATGAGCATAACAGATACCTCGATCAAATTGAATGTCCTGATTGCCATGAGTTTTTTCTAACTCAAACTGCTCTACAG…	LERGESSNVHPSDAHGYLGMCDFEDSDDTMMPVPKREMTRQKFRRFRHKEYQCDECDRMFTLKHNLQNHFVQYHMGCKTLHKACVSSKCDICGKIYSAVSVLAEHMLNEHNRYLDQIECPDCHEFFLTQTALQKHMKEHKREEKHCPYKECRGIKFRFNRELNEHVRLQHKSKELSCCVCNMVFRQLSAKIKHEKTHEKGSPISNILKSSKCSAVNRQVEKNQDWFRTRGSERKAKCDEDLVKREPI	Z003_4146	Caenorhabditis_elegans	C52E12.6	zf-C2H2	zf-C2H2
282	13H04	pTH10015	TGTCACGGACCTACGGCGCGCCATGATGACATCAAATCATATAACTACA	TAGTGCACCACAATCCTGCAGGTATGAGTTTTCATGTGCCTATGCAA	ATGATGACATCAAATCATATAACTACAGACTCTTTTCGTCAGATCCCTCCATCCGGTCTCTGTTATATGGATCCAACTCCATCTCTTCGCCTTCCAAAGAAAGAACCTCTTCCAGTACAACGACCAATGGCAAGATCTACACCAAAACCTTTCAGATGTCAAACTTGTGGAAAAGCATTCTCTCAAGCAGCTAATCTAACAGCTCACAAAAGAATTCATACAGGAGAAAAACCATTTATGTGTCCTGTATGTAATCGTCCATTTTCTCAAAGTTCTTCTCTTGTTACTCATCGAAGAACACACACTGGAGAGAGACCGTATCCATGTGCTCAATGTGAGAAGGCATTCACCGACAGCTCAACTCTTACAAAACATCTGAGAACCCATACTGGACATAAA…	MMTSNHITTDSFRQIPPSGLCYMDPTPSLRLPKKEPLPVQRPMARSTPKPFRCQTCGKAFSQAANLTAHKRIHTGEKPFMCPVCNRPFSQSSSLVTHRRTHTGERPYPCAQCEKAFTDSSTLTKHLRTHTGHKPYVCSICMMKFTQSGNLHRHMKTHK	Z003_4348	Caenorhabditis_elegans	C55B7.12	zf-C2H2	zf-C2H2
283	13H11	pTH10016	TGTCACGGACCTACGGCGCGCCCCAAAACTGGAAAGTGAAATAACGG	TAGTGCACCACAATCCTGCAGGCAATAGTCGTGAGATTTTCCAAAAGTG	CCAAAACTGGAAAGTGAAATAACGGCGCCTCGCCAGTCAATGTCTACGGCATTTCAAAAAATGCCCACATTCACATCAGTGATAAGTGTACCGAGTATAGCCGCAATTGCACCACAAATGCCAAGTGTGAAGCCGGAAAAGGGTGTAATTGGCCAATGTTTAATATGTGGAGAACCTTCAACTGGAAAACATTATGGAATCGTGGCGTGCCTTGGATGCAAAACGTTTTTTCGAAGAGCAGTTGTCCAGCGTCAGGATACAGAGTGCAAACGGGAAAAGCCATGTGACGTCACTACAATGGCAAGAAAAGCTTGCAGAGCTTGTCGATATAGGAAGTGCTTAGAAAGTGGAATGAGCAAGGAAGCCCTTCAACCCCGTCGAGATCTCATCGGATGCCGT…	PKLESEITAPRQSMSTAFQKMPTFTSVISVPSIAAIAPQMPSVKPEKGVIGQCLICGEPSTGKHYGIVACLGCKTFFRRAVVQRQDTECKREKPCDVTTMARKACRACRYRKCLESGMSKEALQPRRDLIGCRRIRSRPSCSTSTPTPPRPQVEDKSQYLTLLENLTTID	Z003_4734	Caenorhabditis_elegans	E02H1.7	zf-C4	zf-C4
284	13H12	pTH10017	TGTCACGGACCTACGGCGCGCCATGTATTATGGACATGAACCCCAC	TAGTGCACCACAATCCTGCAGGCATCTTTTGTAACAATTACTGTAGTTG	ATGTATTATGGACATGAACCCCACGACTGGGGCACCTCAAGCTCAACAAGTGACATGAAGGAGTGCACAATTTGCGAAGCTCCATCCAATGGATATCATTTCAATGCGGCCTCTTGTTCTGCGTGTGCAGCGTTTTTCAGACGTACCGTAACCCTCAACCGTAACTTCGTCTGCACCCACCAAAACACTTGTAGAGTGAACTACGCGATGAGAGTGATTTGTCGAGCTTGTCGGTATCATAAATGCATTAATATGGGAATGGAAAGATCAGCAGTCCAACCCCGCCGTGACTGCAACGCTGGCCGCCGAAAAATCATGTACAACAGCACCAACTCCCTGAAAACCCAGGAGCACACCTTCGCCCCGCCCACACCTACAGTACCCCAAACAACTACAGTA…	MYYGHEPHDWGTSSSTSDMKECTICEAPSNGYHFNAASCSACAAFFRRTVTLNRNFVCTHQNTCRVNYAMRVICRACRYHKCINMGMERSAVQPRRDCNAGRRKIMYNSTNSLKTQEHTFAPPTPTVPQTTTVIVTKDE	Z003_4750	Caenorhabditis_elegans	E02H9.8	zf-C4	zf-C4
285	14B03	pTH10018	TGTCACGGACCTACGGCGCGCCATGTCGTGTCTGGTGTGTGA	TAGTGCACCACAATCCTGCAGGGCTGCTGCTCGAAACTCGG	ATGTCGTGTCTGGTGTGTGAGACCGATGCACACGGTCAGCACTTTGGTATCCGATGTTGTCGGGCGTGTGCAGCATTTTTTAGAAGAACTCTTACAATGAACCTTAGGTACAAATGCCGATTTGATCGAAAATGCGAAGTTTCATTTAATAAAAGGTACTCCTGCAGATGTTGTCGTTATGAAAAATGTGTTCGAGTAGGAATGCGAAAAGACAATCTCACATCCCCTGTTTCAGTGGTACAAAACAAATCGGAGACCGAGAAGGACTCGTCTGGAAATGAGACTGACAGCATTGGACATTCTCCGCATTCTTCCCTGGAATCTTACACGTGTCGACCGCCGAGTTTCGAGCAGCAGC	MSCLVCETDAHGQHFGIRCCRACAAFFRRTLTMNLRYKCRFDRKCEVSFNKRYSCRCCRYEKCVRVGMRKDNLTSPVSVVQNKSETEKDSSGNETDSIGHSPHSSLESYTCRPPSFEQQQ	Z003_5904	Caenorhabditis_elegans	F16H11.5	zf-C4	zf-C4
286	14C08	pTH10019	TGTCACGGACCTACGGCGCGCCAAATCACTTCCAGCTACAACAAAGT	TAGTGCACCACAATCCTGCAGGTCGGGTCCTGTTCCAGGTC	AAATCACTTCCAGCTACAACAAAGTCACATTCGGATTCAGCAGATCAAACACTTGGAATCGAAAGATCAAGACGTGAAGATTCTTCGTCATCCGAATTATCCGAATGTTACTCTGCACAGAATTATTTGATTCAAAACGCGTACTACTCGGAAAAATATGCTCCAGCTATCATACACAAATTGCTTCCTGCCTTTGAGGCAAACAAAAATCCAAACAACGATGAAATTTTGGAAATAATGGCAGATACAGGATTATCTCGAAAAGAAGTTCGTCGCTGGTTCCAATGGCGTAATGGCACAAACTTCAGAATTGTTAGGCCAGTGACTGAGGAGCAGAAAAAACGGGCTGCTGAACGAGAAAGAAGCAGAGCTCATTTGAAAGTGGACCTGGAACAGGAC…	KSLPATTKSHSDSADQTLGIERSRREDSSSSELSECYSAQNYLIQNAYYSEKYAPAIIHKLLPAFEANKNPNNDEILEIMADTGLSRKEVRRWFQWRNGTNFRIVRPVTEEQKKRAAERERSRAHLKVDLEQDPI	Z003_6876	Caenorhabditis_elegans	F28H6.2	Homeobox	Homeobox
287	14C09	pTH10020	TGTCACGGACCTACGGCGCGCCCCGATCCCAGCAATCCCGA	TAGTGCACCACAATCCTGCAGGTAGAATATGGTACAGAGTCAGCACG	CCGATCCCAGCAATCCCGACTAATCAAATCTACAATCGAACATTCACCGATTTCTACTCGACGGCAGCTTCATCGCCTATGGTACAGTATAGCACGGTGAAGAAATCGTCGGCTGGGAGAAAACCTAAAGAAGAGGATAATATGGAGGATGACGATGATGATAAGAGGCTGAAACGTCGTCAAAGGAATAAAGAAGCTGCTGCAAGATGTCGGCAAAGGAGAATTGATTTGATGAAGGAATTGCAAGATCAAGTAAATGACTTCAAAAATAGCAACGACAAAAAAATGGCGGAATGCAACAACATCCGAAATAAGCTCAACAGTCTCAAAAACTATTTGGAAACGCATGATTGTAAACTGAGTCGCGAAGAACGAACACATGAGATAAATCGATTGATA…	PIPAIPTNQIYNRTFTDFYSTAASSPMVQYSTVKKSSAGRKPKEEDNMEDDDDDKRLKRRQRNKEAAARCRQRRIDLMKELQDQVNDFKNSNDKKMAECNNIRNKLNSLKNYLETHDCKLSREERTHEINRLIIPPSTVPPSQPYLQHSLRVHPPRADSVPYSI	Z003_6942	Caenorhabditis_elegans	F29G9.4	bZIP_1	bZIP_1
288	14D01	pTH10021	TGTCACGGACCTACGGCGCGCCTACACTCTCTATGCTCCGGATTC	TAGTGCACCACAATCCTGCAGGCTGCCACCTGGTTTACCGTA	TACACTCTCTATGCTCCGGATTCAAACTATGCGCCGTACTATCAGTATTCAAACAACATGCAGTCAAGCCCTCAAGACAATGCACCATATTTGGTCCCTGCTCCACAGTCCCCGGTCTCGATCGACGACGCAGACTCGATCAACTTGCCGAACAATCAACGAGCTTCCCCCGCAACGGTGAACTGGCTCTTCGAGAATTACGAGATTGGAGAAGGGTCGCTGCCAAGATGTGAACTCTACGATCACTACAAAAAGCATTGCGCTGAACATCGAATGGATCCAGTGAACGCTGCCTCATTCGGAAAGCTCATCCGATCCGTCTTCCACAACCTCAAGACCCGACGGCTGGGCACCCGCGGCAACTCGAAGTACCACTACTATGGCATCCGTCTGAAGGAC…	YTLYAPDSNYAPYYQYSNNMQSSPQDNAPYLVPAPQSPVSIDDADSINLPNNQRASPATVNWLFENYEIGEGSLPRCELYDHYKKHCAEHRMDPVNAASFGKLIRSVFHNLKTRRLGTRGNSKYHYYGIRLKDSSTLHSMQHPQPQIIQNTYTPPMQLPQRDAYADTVNQVAA	Z003_7211	Caenorhabditis_elegans	F33H1.1	RFX_DNA_binding	RFX_DNA_binding
289	14D04	pTH10022	TGTCACGGACCTACGGCGCGCCATGAAATGTGCAATTTGCGACTC	TAGTGCACCACAATCCTGCAGGATAGTAATCCAGACGGTGCAGAA	ATGAAATGTGCAATTTGCGACTCGGTAGCTCTTTCGCTACACTTTGGAGCTCCAAGTTGTAAGGCCTGCGCCGCATTTTTCCGCCGTACAGTTGCTCTGGACATCACCTATGACTGCATCACTGGAACTTTGGATTGTGAAGTTAATTTTGAACGACGAATGGCCTGCAAACGATGTCGATATCAGAAATGTATTGATAATAATATGCAGAGATATTTGGTTCAATCGAAAAAAGGACGACCAGACGCATCGACAGCAAATGGAATCGAAAATCCCACAACATCAGCTTCTCCATCAATACCGTCTCCCTTCTCACCACCATGTCCATCTTCGCACAATTCTGCACCGTCTGGATTACTAT	MKCAICDSVALSLHFGAPSCKACAAFFRRTVALDITYDCITGTLDCEVNFERRMACKRCRYQKCIDNNMQRYLVQSKKGRPDASTANGIENPTTSASPSIPSPFSPPCPSSHNSAPSGLLS	Z003_7418	Caenorhabditis_elegans	F36A4.14	zf-C4	zf-C4
290	14D12	pTH10023	TGTCACGGACCTACGGCGCGCCATGGAGAAAATTGGAATTGATACTGC	TAGTGCACCACAATCCTGCAGGTTGCATCAGGCTTTAAGGATTTGT	ATGGAGAAAATTGGAATTGATACTGCTTTCGCTGAGCCTGGTGTTCGACTTTCCATCAATTTGAGAGAAAGATGCCGAATGCATGACTTAAACGAGGCACTTGACGATCTGCGAGCTGTAATTCCATATGCTCACGGGGGTTCCGTGAGGAAGTTGAGCAAGATTGCTACGTTGCTTTTGGCCAAAAATCATATTATCATGCAGGCAAAAGCAATTGAGGAGCTGAGTATATTGGTCTCCCAGTTGAAGCGGAAATCGGAAAATTTGGAGAACTTGAACAAATCCTTAAAGCCTGATGCAA	MEKIGIDTAFAEPGVRLSINLRERCRMHDLNEALDDLRAVIPYAHGGSVRKLSKIATLLLAKNHIIMQAKAIEELSILVSQLKRKSENLENLNKSLKPDAN	Z003_7669	Caenorhabditis_elegans	F38C2.2	HLH	HLH
291	14G04	pTH10024	TGTCACGGACCTACGGCGCGCCATGACGACTTCGTATATTGTCATTGAA	TAGTGCACCACAATCCTGCAGGAAGAATCTCCGAGATCTTCATCACT	ATGACGACTTCGTATATTGTCATTGAAATTTCTGAAAATGAGAATGCATCGGATATTCTCAATTTATTGATGACACGAACAAAATCCCGATTCACAATAACCAGAGATATTGGTGAATATGCGGCTGAAAGAGAGCAACTGAAAAGATCAAAGATTTGTGAAGAAAAGGTTCCGGCTGAAGACACTGCAACAAAAATTCCAACATCTGAATGCCTGGAACCAATTGAACAACCACCAAAAAAGATGATCCGTATCTCACCAACACCTCCAGTCAAGGACCTTGTTCCAAGCTCATTTTCACATATAATACCAAAAATTGAGGAACCTGCATCCGATTCTCAAACTCCAAGTCTTGACTCAATGCTTGAATCGAATGTAAATCAATGGAACAACTCTTTT…	MTTSYIVIEISENENASDILNLLMTRTKSRFTITRDIGEYAAEREQLKRSKICEEKVPAEDTATKIPTSECLEPIEQPPKKMIRISPTPPVKDLVPSSFSHIIPKIEEPASDSQTPSLDSMLESNVNQWNNSFIGSSFLDQLQSSSSMTSTPAVNTSTITKTPIKRQNGAFQCHMCGAMIKAYHLDYYKRSNHAIIHTSLQRYICPVKNCGTKNRHRSNMVVHARTVHGLQGKVDVKNCLLPHEDEELKMTVLTCFPEMEQTIQNMQKREQKQNDQEDAGVESDEDLGDSS	Z003_8826	Caenorhabditis_elegans	F52B5.7	zf-C2H2	zf-C2H2
292	14G05	pTH10025	TGTCACGGACCTACGGCGCGCCAAACTAACAGCTGTGAAACCAGT	TAGTGCACCACAATCCTGCAGGATTCTGCGTCGAAGCACTCT	AAACTAACAGCTGTGAAACCAGTGGATAAAGTCAATGATGTACTGGACTTTATCAATTTTGACAAGAAAGTATGCGATGGAATCCATTCATCAATCAAATTAGTTTCACAACGAGATCAGACGGGACCAGCACCGTTTCCGAAGCATAAGCTGACGTGCGCCCATTGCGACTGGTCGTTCGACAATGTGATGAAGCTTGTCCGTCACCGAGGTGTTCACAAGAATGTGGGAGTCTACATGTGTCAAGTGTGCCTCACACTGTTTGGACACACCTATAATCTGTTTATGCATTGGCGGACATCGTGTAGCCAGACATCGACAACTGCCACGGATATCGAGATACAAAAAGCAGAAACGCCGTACCTTCATCGCAATGTGCTCAATGTTTTGGGCTCACTG…	KLTAVKPVDKVNDVLDFINFDKKVCDGIHSSIKLVSQRDQTGPAPFPKHKLTCAHCDWSFDNVMKLVRHRGVHKNVGVYMCQVCLTLFGHTYNLFMHWRTSCSQTSTTATDIEIQKAETPYLHRNVLNVLGSLNRASQYYCTGGYVFLPSDWCITNKEIVMEKDHMSSCHLCHLPVPNKFLEAHGNVHRGRFRIDGRIYGDYFCHICGTVFIEQDNLFKHWRLHCEEVIAYTPVDQYLSNTELATLAWLVLQTTISQADIECLRVSSSLITEKLAKEHAERHGIANSMHKYYHFPQEIWPLKTFVNLDLVNDAIPISGENSFKIKDPKRPVHIMNLLATACPGFYATGKTFNMICSTKKSESDTKKVYRVILRYTTEGSVIQSYDFTARSFPKLRVDSE…	Z003_8867	Caenorhabditis_elegans	F52E10.1	zf-C2H2	zf-C2H2
293	14H03	pTH10026	TGTCACGGACCTACGGCGCGCCAGCATCAGAGTTGAAACTGAAACA	TAGTGCACCACAATCCTGCAGGCAAGATTCAATGATAAATCCAGCGG	AGCATCAGAGTTGAAACTGAAACAAATATTGATTCATTGGCTAAAGAAGAGAAACTGTCTGAACATGTTCACGACGAGAAAGCAGATAAGATTGAGAAAACATCGGAAGATAATGATACGTCGACACTTCTAAAACTGAAACGTCGTGTTGCCTGTGACATCTGTTCGAAATCATTTTGTGACAAGGGAGCACTCAAAATCCATACATCAGCAGTACATCTTCGCGAAATGCATACATGCACCGTAACGGGTTGCGGGAAACAATTTAGCAGCCGAAGAAGCCGTAACCGTCATAGTTCGAACAACAACCCAAAATTGCACATGCCCGAGTCACTAACCTTAACTGGTTCAGGACTTTCCATGAAGACTAGTTTGGATACATTTTGGCCGACCCGGTTT…	SIRVETETNIDSLAKEEKLSEHVHDEKADKIEKTSEDNDTSTLLKLKRRVACDICSKSFCDKGALKIHTSAVHLREMHTCTVTGCGKQFSSRRSRNRHSSNNNPKLHMPESLTLTGSGLSMKTSLDTFWPTRFLLGKDHPLDLSLNLV	Z003_9333	Caenorhabditis_elegans	F55C5.11	zf-C2H2	zf-C2H2
294	15C07	pTH10027	TGTCACGGACCTACGGCGCGCCATGAGCTCACTGTATTTGTGTCG	TAGTGCACCACAATCCTGCAGGGAGGACTTGAAGCACATGATGTAT	ATGAGCTCACTGTATTTGTGTCGTGACTGTTCGGGTGCATTTCACAGTTTGGACGAACTACAGAGACACGAGAGGGAGGAGCATGAGACGGTGGAGCAAGGGGATCAGGAAGAGGATCGGATGGAGGATGACAGTGATGAGCTCGCGATGATCAAAATCAAGATCGAAGATTCCGATTTTTTATCGGACACAGATTCATCACAACTATCCATGAATCCAACGACACCTTCAGAAAAGTCATCTTCTGGTGAGAAAGGGCGTTACGAGTGTGAAGATTGTCATGAGATGTTTGCTGTAAAAAGAGAGCTGGCCACACATATGAGAATTCACAGTGGAGAACAACCGCATAGTTGTACGCAATGTGGAAAAGAGTTTGGAACTCGGCAATTATTGAAAAAG…	MSSLYLCRDCSGAFHSLDELQRHEREEHETVEQGDQEEDRMEDDSDELAMIKIKIEDSDFLSDTDSSQLSMNPTTPSEKSSSGEKGRYECEDCHEMFAVKRELATHMRIHSGEQPHSCTQCGKEFGTRQLLKKHWMWHTGERSHVCPHCNKAFFQKGHLTQHLMIHSGGRPHECPQCHKTFIFKFDLNRHMKIHQERGFSCQQCGRSFLKQVMLDEHHLKCKGKPSSPIRSLLTPTMKAGLESAISIKPPQESMILSSETIAKMAQKLLIQQQENHRNALNTLLVKQHENILNNNNNNESNILNGSVMHKDAGFEIPAPTIPLSLTCMICKSQFNSQPSFTLHMYMHHIANQNPNLSIDSTHIHHTHQPTTISHQNDPTPLGSDSDLATDTSCASSPQ	Z003_11603	Caenorhabditis_elegans	M03D4.4	zf-C2H2	zf-C2H2
295	15C10	pTH10028	TGTCACGGACCTACGGCGCGCCATGTTGGAGTACGACCAGGTAG	TAGTGCACCACAATCCTGCAGGGATTGATGAGATCTGTTACTTGAGCT	ATGTTGGAGTACGACCAGGTAGAGCTGCCAAGCTGTAGTTCCGCTTCAGCAACATCAAGCCCCGCTCTGGAAAGCTTCATTGAGCAGAAGCCTCCAAAAACCAAATCCCTGAGAAAATCTGGAAAACCCTATCAATTTGTGCCAAGTGCGTGTCAAGTTTGTTATGGAAAGGCTACTGGACATCATTATGATGTGGCTTCTTGTAACGGATGCAAATCGTTTTTTCGAAGAGTGACTATAGAAAAACTAAAATACAGATGTTCTGCTGGTAATGCATGTTATACAAATTTTGGACCCGGTGACCCAGTTCCAAAATGTCGAGCATGCCGGTACAAAAGATGCTTAGAAGCCGGTATGAACGCTCTTGGAATCCAATCTGAACTCCGAAAACATAGTGAA…	MLEYDQVELPSCSSASATSSPALESFIEQKPPKTKSLRKSGKPYQFVPSACQVCYGKATGHHYDVASCNGCKSFFRRVTIEKLKYRCSAGNACYTNFGPGDPVPKCRACRYKRCLEAGMNALGIQSELRKHSENQPLEENSSEFGKEIVVLPRIKEPPKSIEAQVTDLINH	Z003_11860	Caenorhabditis_elegans	R02C2.4	zf-C4	zf-C4
296	15D02	pTH10029	TGTCACGGACCTACGGCGCGCCAATTTGACATCGAAACCCTCTGC	TAGTGCACCACAATCCTGCAGGGTTCCATCATATTATGATCATGGAGAG	AATTTGACATCGAAACCCTCTGCCAAATATTGGACAAAAAGAGGAGGAGATCCAATTGTTAATTGCTCGTGCTCAATATGTGGATCCAAATTTTCAACCATTCGCTGTCTTCTTGATCATCGTCATCAAGAACATTCACTGAAAGATATGATGATGTGTGGTCTCTGTGGAAAAGAGTTTTCGAAGCGAACACATATCTATTTGCATCTAAGTCAAGAATACAAAGTATATCATTGTGACGGTTGCAATACATCGTTTGCCAGCAAATGGCACTTGGAAAAGCATCGATGTAAGGAAAATGAAACAATCGACGATAAAAAACGAAGAAGAACGGGACGTGTAAATGCGGAAGAAATAAAAGTAATAAAAGAAGAGATTCAAGATGAAGAATTTGGTGGC…	NLTSKPSAKYWTKRGGDPIVNCSCSICGSKFSTIRCLLDHRHQEHSLKDMMMCGLCGKEFSKRTHIYLHLSQEYKVYHCDGCNTSFASKWHLEKHRCKENETIDDKKRRRTGRVNAEEIKVIKEEIQDEEFGGVVLSNENHEKSKEDRFQFACVLCGKKYQHYHWLLKHRTKCLETTDEIQEFKCNVCYRRYNSSFWFERHMEKCNSSTALPPALLDQTISCPNCHKKYQNEYWFDYHKKHCPDITPALSDVHLDVNSLRDRRPREGEISVVPDVNLFGIEPEREDDNDDDEDADATISSSSSSTGNLVNIPCSICGKFCVGVASLLHHRKQIHGLTAMLTCGVCTKKFNTLSSIRRHMSMEYSIFRCQQCGRNCIDRTTLDRHECFKPYKIRDKRLFN…	Z003_12112	Caenorhabditis_elegans	R06C7.9	zf-C2H2	zf-C2H2
297	15E05	pTH10030	TGTCACGGACCTACGGCGCGCCTATGTGCTCCCAGCACGCC	TAGTGCACCACAATCCTGCAGGCAAAGGCACGGCGATCCTC	TATGTGCTCCCAGCACGCCACGTGGCAGCGCCACAGCCTCAGAGAATGGCTCCCAAGCGTGCACTTCCAACAGAACAAGTTGTCGCACAACTTCTTGGCGATGATATGGGACCATCTGGGCCACGCAAAAGAGAACGACTGAATCATTTGAGTCAGGAGGAGAAAATGGATCGTCGGAAACTTAAAAATCGAGTCGCAGCCCAAAATGCTAGAGACAAAAAGAAGGAAAGATCAGCAAAGATCGAGGATGTGATGCGCGATCTGGTGGAGGAGAACCGCCGGCTCCGCGCTGAAAACGAACGTCTTCGCCGTCAAAATAAAAATCTTATGAACCAGCAGAACGAGTCCGTCATGTATATGGAAGAGAACAACGAAAACTTGATGAACAGCAATGATGCA…	YVLPARHVAAPQPQRMAPKRALPTEQVVAQLLGDDMGPSGPRKRERLNHLSQEEKMDRRKLKNRVAAQNARDKKKERSAKIEDVMRDLVEENRRLRAENERLRRQNKNLMNQQNESVMYMEENNENLMNSNDACIYQNVVYEEEVVGEVAPVVVVGGEDRRAFE	Z003_12710	Caenorhabditis_elegans	R74.3	bZIP_1	bZIP_1
298	15E06	pTH10031	TGTCACGGACCTACGGCGCGCCCCTCTGGATTTGAGTAATAAGACAATG	TAGTGCACCACAATCCTGCAGGCAAGTGAAATGGGAAATGGAATCG	CCTCTGGATTTGAGTAATAAGACAATGAATATGCTCCAGAAAATTGGAGTTTTCAACAGCGTGACGAAAAGTGAAGATGATGAATCGGTTGCACCAGAAAAACCAGTAGATGAATCGTTAAACAAATCGAATATTTTGAGGAGAAACTACACTGTGGAGGATTTGACCCAAGCAGTGGAGGACATTCGACAAGGAAAACTTGGAACAAGAAGGGCATCTGTGGTATACGGTATTCCTCGATCAACTCTACGAAACAAAATTTATAAGCTCGAAGCGGAAGGGGCAATCCCATCAAAAGTTCGCCGTGGAAAAATAGCGGCGCGACGAGCCGAAGCGGAGCAAAAAAGATGTGTTGAGGCGACGGCGGCGGCTGCTTTATTGGACGCGTTCGGCAATCAA…	PLDLSNKTMNMLQKIGVFNSVTKSEDDESVAPEKPVDESLNKSNILRRNYTVEDLTQAVEDIRQGKLGTRRASVVYGIPRSTLRNKIYKLEAEGAIPSKVRRGKIAARRAEAEQKRCVEATAAAALLDAFGNQSDSSSSSPHASMCPSSPDSTNSSLEGTGETPEMSDKKSCSPLDPKWLESIWQNLFKTQGNVVPVDSANISNVDTHTPTPISEKSQKMHGNEEWKRSRPKRGQYRKYDKNALDEAVRSVRRGEMTVHRAGSFFGVPHSTLEYKVKERNLMRKKKDCLYSHDSSTSEDGSQLVTSTISEKSDSSSHTSTPIPFPISLV	Z003_12745	Caenorhabditis_elegans	T01C1.2	HTH_psq	HTH_psq
299	15F04	pTH10032	TGTCACGGACCTACGGCGCGCCATGACAGATCAAGTGTATGTGACAC	TAGTGCACCACAATCCTGCAGGTCATTGTTGGAAGGATCCGTG	ATGACAGATCAAGTGTATGTGACACTTCGAGAAGATCAGGATAAGCTGTGGAACCTCTTCCATTATCATAAAAACGAGATGATTGTCACAAAATCCGGCAGGAAAATGTTCCCGAAGCTTGAGTATGTGGTCAGAGGTCTCACGCCGAACAAGCTCTACGCTATGATGCTTCATATTGAGCCATCCGACGATCATCGGTACAAGTTCAGCAGTGGAGAATGGGTCAAGTCGGGAAAAGCCGAAAAGCACAGGGAGCCAAAGAAGTTGTGGCATGCGGATGGAGTTAGAAGTGGAAAAGAATGGATGACCAACCCAGTTTGCTTCGATCGTGTAAAAATCACAAATTGCGCTGAATCTACAAATGCATCAATGATTTTCCTTCACAGCATGCACAAATAC…	MTDQVYVTLREDQDKLWNLFHYHKNEMIVTKSGRKMFPKLEYVVRGLTPNKLYAMMLHIEPSDDHRYKFSSGEWVKSGKAEKHREPKKLWHADGVRSGKEWMTNPVCFDRVKITNCAESTNASMIFLHSMHKYTPVMSIYESPSESPFSVPQPSTRLVTSVRLTYTEFIAVTAYQNDAVIKLKIKFNPFAKGFREGSQSDRKRNSPSADDSTTDESSSQVSSPQPKKSRTVSVSPPLMPRILPTMI	Z003_13355	Caenorhabditis_elegans	T07C4.2	T-box	T-box
300	15F07	pTH10033	TGTCACGGACCTACGGCGCGCCTGTCCACCAGCTGGCACCG	TAGTGCACCACAATCCTGCAGGCGGAGAAGGAGGCTTCAACA	TGTCCACCAGCTGGCACCGAATCACGAGACGACGAGGACGCTCTATGTGCTTTGTATAGAAGCAACTTTGACACAGAAAAGGCGAAAGAATCATTCCCTTTTCCTCATATAAATGCCCCATTCCGCACTGTTCGCTCAGATGCATTGGGATTCGATGAGAGTGAAGCAAAGGCATTTGAAGAGTCACTCGAGCTGTATGGAAAAGATTTTTCGCTGATAAGGAGACTACGGCTACCCTACCGGAAAGTTGGAGAACTTATCGAATACTACTATCAATGGAAATTAACCCCTGGCTATCGAGTTTGGCGGGACGCTCATCCACAGCATGCGCCAGTAGTTCAGCCTCATTTATCTGCTGCATGGCATCAGCAAGTAGCTCAACTGGAAGATCAAAATGGT…	CPPAGTESRDDEDALCALYRSNFDTEKAKESFPFPHINAPFRTVRSDALGFDESEAKAFEESLELYGKDFSLIRRLRLPYRKVGELIEYYYQWKLTPGYRVWRDAHPQHAPVVQPHLSAAWHQQVAQLEDQNGQTGFVEASFSE	Z003_13408	Caenorhabditis_elegans	T07F8.4	Myb_DNA-binding	Myb_DNA-binding
301	15F08	pTH10034	TGTCACGGACCTACGGCGCGCCGCCTCAACTGATGTGTTCGC	TAGTGCACCACAATCCTGCAGGTGAAACCTCCAGATGGTCCC	GCCTCAACTGATGTGTTCGCAGCAATGGATATGAGTCAGAAACAGTCATCACCTCCTGGAATATTTAAAATTGTTGCAGCCAAGAACGAGCCGAGCAGCTCATCGAATTCGCAACCTGGCACACCGGCAATGGGTGATCGACGAGCGGTTCCTGCTTGCGCCATTTGTGGTACAGATTCGACGGGTATTCATTTCGGAGTGGACGCGTGTGCCGCGTGTTCGGCGTTCTTCCGACGAACAGTTGTTCTCAATAAAGACTATTCATGTAACAAGGGAGGAAAATGTACAGTAGTCAAAGATGGATCAGCTGGTCAAAAATGCAGAGCATGTCGATTTCGTAAATGTATCAGTTCAGGAATGGATAAAAACTCTGTTCAACATCGTCGTGATGCTATCGGA…	ASTDVFAAMDMSQKQSSPPGIFKIVAAKNEPSSSSNSQPGTPAMGDRRAVPACAICGTDSTGIHFGVDACAACSAFFRRTVVLNKDYSCNKGGKCTVVKDGSAGQKCRACRFRKCISSGMDKNSVQHRRDAIGKYSAGVKRELSPDAEFEPSAKVSTVSEPSTSSGPSGGFN	Z003_13531	Caenorhabditis_elegans	T09A12.4	zf-C4	zf-C4
302	15G01	pTH10035	TGTCACGGACCTACGGCGCGCCGGTCTTGAAAAGCCTGGATCATC	TAGTGCACCACAATCCTGCAGGTCTCCTTGTTATCAAACATCACTCC	GGTCTTGAAAAGCCTGGATCATCAGACATTTCGTCTTCTTCCACTGATACTTCCGCCATTTCTCCGATTAGCGTGAGCAGTATGCCACTATCACCGGACAAGGAAAAGAAAAAGATCTCATTTGTCCGATACAATCCAGACATTCCACAAATTGTCACATCTTTCAAAGGATATCAAAAACTTATGTATCAAGGCTACCGATATAATATTTATCAGATTGCTCCAGAACGTAACTTCAAGTCTTGGAGATGCGTTTGCGCTAAGAAAATGCATGATGGGCAGTGGTGCAAATGCCGAGCTGAAACAACCATGGATAATAAAAACGCATGCACGAAAGGATCACACAATCACCCTCCAAGACACCATGTCGCTGAGATCGAATTTATCAAGTCTCAACTA…	GLEKPGSSDISSSSTDTSAISPISVSSMPLSPDKEKKKISFVRYNPDIPQIVTSFKGYQKLMYQGYRYNIYQIAPERNFKSWRCVCAKKMHDGQWCKCRAETTMDNKNACTKGSHNHPPRHHVAEIEFIKSQLYSAALENPDHDAGDLVNQASMYLSDGVMFDNKES	Z003_13925	Caenorhabditis_elegans	T14F9.4	FLYWCH	FLYWCH
303	15G08	pTH10036	TGTCACGGACCTACGGCGCGCCATGGCACCTTCTTACTCGAGG	TAGTGCACCACAATCCTGCAGGTGCTTCGAGAAGATGTTGTTGAAA	ATGGCACCTTCTTACTCGAGGAATACAAAAAATTCAAAGAAGACGGCACCGATATCTGCTGAGGAAAAACACAAGATTCTTGAAGAAGAATTTGCAAAAAGTCCGTATCGAGGACAAAGGAATTTGGAGTTGTGTGCAATGTTCAATATGACTAGGAGAAGGCTCGATGCCTGGTTCTACAATAGAAGAATTAACGCAGGAATCGCGACAGGAACCCCAGGTCTATCACATTCCACAGAAGTTCTCAAGATTCTCGAAAATGCGTTCAAAACTCACCAATATGTAACTCGAGAGCTCACAAAGGAACTGACGGAAAAGGCAGGGCTCAATGAGAAGCAAATTTGGTTTTGGTACAGAAAACGACGAGCAAAAGCTGAAGCTGCTCATAAAACAGGCGCC…	MAPSYSRNTKNSKKTAPISAEEKHKILEEEFAKSPYRGQRNLELCAMFNMTRRRLDAWFYNRRINAGIATGTPGLSHSTEVLKILENAFKTHQYVTRELTKELTEKAGLNEKQIWFWYRKRRAKAEAAHKTGAELPFQMKLLEIAYAEDPGFTKETLNRLKEEGGLESKDISAYFSAQNERAKFSKHKDAEKNEQEYLAQKKIKDREKFERHSESAVKLFKETFSKFQFPNDSLIAELIEKTQIEGVKIRRWFTRARETAMKAYKNNGTPLPLGMKERQKEMETIGNATKRIRTSAGADADLSTTSSRSK	Z003_14255	Caenorhabditis_elegans	T21B4.17	Homeobox	Homeobox
304	15G12	pTH10037	TGTCACGGACCTACGGCGCGCCACAGCTGCAGCAAAGAAGAAC	TAGTGCACCACAATCCTGCAGGATGAATATCGATCCATTCTGTATGGC	ACAGCTGCAGCAAAGAAGAACAAAATTGTTGGAGCTCCAAGCGAAGACCCGAAAATTCGAGCTCTCCAATGTGATATCTGCTTTGCATTATTTAAAAATGCTGATAAGAAAAAACGCCATGACCATTCTCATAAAGATGAGCCAGAGGTATACTGTCCAATGTGCAATGCTCCAATCAAGTATAAATACAACTTGAAGCAACATATGAACAAATGTCAACCGAGCCAGAAAGAAATGGAACAAGGCAGTATGCTCGCCAAAGCTTACCCGGACTACTTACGTCAACTTCAAGAAGCTGCAGTTAATCCGTCTCTTCCAATGCCAACTTTGAATGGAATGCCATACAGAATGGATCGATATTCAT	TAAAKKNKIVGAPSEDPKIRALQCDICFALFKNADKKKRHDHSHKDEPEVYCPMCNAPIKYKYNLKQHMNKCQPSQKEMEQGSMLAKAYPDYLRQLQEAAVNPSLPMPTLNGMPYRMDRYSF	Z003_14372	Caenorhabditis_elegans	T22C8.4	zf-C2H2	zf-C2H2
305	15H02	pTH10038	TGTCACGGACCTACGGCGCGCCGTCAACTCAGCGTTCCGATC	TAGTGCACCACAATCCTGCAGGTGAGAAGTGCAGTTCCGTCG	GTCAACTCAGCGTTCCGATCACCAGTTAAAATCGAACCCAATGATGATTACGAGCAGTCAAGTGTAAAAGACGTAATGGATGTCAAGCCGGAGGTTTTTCAGTCAGCCAAGGAGCGACGACGCTCGAAAGTTTCAGCGAATGAGCCACACGTTCGCCGTCCAATGAACGCATTCATGATATTTTCGAAACGTCATCGTCCGCTTGTCCACCAACAGTATCCGAATAAAGACAACAGAACCGTGTCGAAAATTCTCGGAGAATGGTGGTACTCCTTGGCGGCTGACCAGAAAGCGGAATATCACAAACTTGCAACACAAGTGAAAGAAGCACACTTCAAGGCTCATCCAGATTGGAAGTGGAGTACGAAGGAAAAGAAAATAAAGTCCGAGTCGCTGAAC…	VNSAFRSPVKIEPNDDYEQSSVKDVMDVKPEVFQSAKERRRSKVSANEPHVRRPMNAFMIFSKRHRPLVHQQYPNKDNRTVSKILGEWWYSLAADQKAEYHKLATQVKEAHFKAHPDWKWSTKEKKIKSESLNTTPVALTPLKNKVFDFDIRTSDDLAKSFVDGTALLS	Z003_14428	Caenorhabditis_elegans	T22H6.6	Sox	HMG_box
306	16E07	pTH10039	TGTCACGGACCTACGGCGCGCCTGGCAGCTTAACATGTTCTCG	TAGTGCACCACAATCCTGCAGGAAACAAAACCAATCGATACAGCAC	TGGCAGCTTAACATGTTCTCGTGTTGGATGCTCGACTTGCTCCGACGTGCTCCACAGTTAAATGATGGGCTCGCTCAGGCAACAATTGGAAAGTTGACTGCAATTACAGAACAATTGAACAAATTACTTTTTATGCTGGTTTCACAGAGTTTTATTGTTTCCGTTCAACCGGAACCTGTTTTGAAGACTCAACATAAATTTGTCACTGAGGTCCGTCTTCTCATTGGCGATAAGCTGGGAATTCGTCAACACCTGGTGAACACAAATGTTTCAGTGAAAATTATAGCAGAAGATGAAGCCAAGCAGTTGAGTGTTGACTATGATGCACATAAGGAAATCCGTAACAACAAGACAGTTGGCACAATTTCCAATGATTTCGAGAAGCTCACAATGAATGAA…	WQLNMFSCWMLDLLRRAPQLNDGLAQATIGKLTAITEQLNKLLFMLVSQSFIVSVQPEPVLKTQHKFVTEVRLLIGDKLGIRQHLVNTNVSVKIIAEDEAKQLSVDYDAHKEIRNNKTVGTISNDFEKLTMNERGHLAAKFNNSKLTRIAHRKPPPKGASDLKCAASMQAATDQKYALLFFITPFQMGNLSKEEQFDVWTLSLPIMVTVHGSQDCDAQVAILWHRAFASISRNPNTTDVTAVTWDNLAIMLRNKFSLFTGARRPLSDSDLAYLSEKMLMPNVADQKPITFHRFAKQAMRDDLPFSFWEWFFSIMQLIKQKLLKFWDEGWCIGFISKNDASQSMMMCQHSSFLLRFSDSQTGAVSIGFVC	Z003_17572	Caenorhabditis_elegans	Y51H4A.17	STAT_bind	STAT_bind
307	16F05	pTH10040	TGTCACGGACCTACGGCGCGCCATGTCGAAAAGTGAGCATTTCGT	TAGTGCACCACAATCCTGCAGGGTTTAGAAGAAGCACCTGATGATGA	ATGTCGAAAAGTGAGCATTTCGTCAGTAAAGAAAACTGGCAACATCTCATCATGAAGCCGGGACCATCGAATTTGGCACTTCCGACGACTCAAAAATTCCGACAAACTTCGAATGGAAGGACAATGAAGCAGACTTGGACCTGCGGAGTTTGCCGGAAGGAATTATCGTCAAAACGGAGTTATACAGAGCATATGAATATTCACAACAAATCACGGCCATTTCAATGTGAACATTGCGTTTATGCTGCAGCCTCCCAAATGACTCTACACCGTCATAAACTCCGAAATCACACTCCAAAAGCTGAATGGGGATATCGGTGTCCCTATTGTGATGATGCGTACATGGAACCTGCTGGATATCAGCAGCATGTCCAACAACGTCATCCGGGACTTTCAGCA…	MSKSEHFVSKENWQHLIMKPGPSNLALPTTQKFRQTSNGRTMKQTWTCGVCRKELSSKRSYTEHMNIHNKSRPFQCEHCVYAAASQMTLHRHKLRNHTPKAEWGYRCPYCDDAYMEPAGYQQHVQQRHPGLSATYGCPFRICKFTSKSQRHFREHLVKHDRSDKIEEGVDPCALSNQQLVRYMVLDEMGIGFQRGYTSYSSSSGASSKP	Z003_18115	Caenorhabditis_elegans	Y59A8B.13	zf-C2H2	zf-C2H2
308	16F12	pTH10041	TGTCACGGACCTACGGCGCGCCATGCCTTACCGTCCAGAAGC	TAGTGCACCACAATCCTGCAGGCCGACGTCTTCATAGCCTTCG	ATGCCTTACCGTCCAGAAGCCGAGCTTAAACGTCCAGATCTCAAGGGAGAGTTCCTGTGTGGCCACTGCGGCAAGACGTTCTGCCACGCCGCCTCGCTCAACCGTCACCGGCTCAACTTCCACGGCGACGATCAACAGTGTCTGGTGTGTGACACGAAAATCCCGCACAATGACACAATCCGTCGTCACATGCAGAAGGAGCACAACATTCAGCGGGTGTTCACGTGCGGCTGCTGCAATTGGACGTTTCCCGACAAGAAGGAGCTGCACTCGCACAACAACTCGATGCTCAAAACTGGAACGCCTGGCACGGCGAAGATTATTGCGGTTAGCAGTCGGCGACCAGGATCCCTATCCCAGCATGAACTTCGTGGTGAGGAACGTAGTCCTCGCATCAAG…	MPYRPEAELKRPDLKGEFLCGHCGKTFCHAASLNRHRLNFHGDDQQCLVCDTKIPHNDTIRRHMQKEHNIQRVFTCGCCNWTFPDKKELHSHNNSMLKTGTPGTAKIIAVSSRRPGSLSQHELRGEERSPRIKKRPSSKAMKTSD	Z003_18312	Caenorhabditis_elegans	Y66D12A.12	zf-C2H2	zf-C2H2
309	16G05	pTH10042	TGTCACGGACCTACGGCGCGCCATGTCTTCTGGCGGTAACAGT	TAGTGCACCACAATCCTGCAGGATATTGTTCTCATCTCAACCGTCATC	ATGTCTTCTGGCGGTAACAGTTCAAATGTGAATAGAAATTCTGGGAGTAGCAATGTGATTACTTTGAATGATTCTGACGAAGAAACCGAGGACAGCAATTTGGGCAGCAGCTCGTCCACAAATCTTTGCAAAGTATGCGGAGCCGAAAAAGCTGCTCTTCACTACGGAGCACTGAGCTGTGTCGGATGTAAAGGCTTCTTCCGTCGGGCTCTTCTGAAGGCTGATCAACTGGAATGTGCTGCAAATGGAGAGTGTACAGTTAGTGTTTTGCAGAAAACCCAATGCAGAAGCTGTAGATTCAATAAGTGCCTACGCGAAGGAATGAATCCTGCTTATGTCCGCCCAAACCGAGACGCACCTCCAAAGCCACGTAAGCCGACAACTACAGTAGCCACGTGC…	MSSGGNSSNVNRNSGSSNVITLNDSDEETEDSNLGSSSSTNLCKVCGAEKAALHYGALSCVGCKGFFRRALLKADQLECAANGECTVSVLQKTQCRSCRFNKCLREGMNPAYVRPNRDAPPKPRKPTTTVATCDQTDRGRTTKSREEWMKKMTVEMRTIL	Z003_18750	Caenorhabditis_elegans	Y73F8A.21	zf-C4	zf-C4
310	13B06	pTH10043	TGTCACGGACCTACGGCGCGCCACAGATGATCAAGTTAGAGAAGAATAC	TAGTGCACCACAATCCTGCAGGGCAGTTGTAAGCGTTTATTTTTGTCT	ACAGATGATCAAGTTAGAGAAGAATACTTCAATCGTCAAAGAATGTATCCTCATGAGAAAAACGTTAAGAGTAAAGAAGCCGAAAATAATTATTCTTCAGAGGCCGATTCTGAAGATTCTCCAGAAGTGGTTCCAGTTCAGCAACAAAAACGACGACCCCGGCAGAATTTTTCCAATACAATCTCGAACGAGCTGAGGATTGTACAAGAGCGATTCCACGGGAGTGTTCCGAAAAAAGACGCTGAGGAGGTTGCTGAATCAATGAATCTCGACAAGACAAGGGTGAACAACTGGTTCAAAAATAATCGGAAGAAGTACATCCGAGACAAAAATAAACGCTTACAACTGC	TDDQVREEYFNRQRMYPHEKNVKSKEAENNYSSEADSEDSPEVVPVQQQKRRPRQNFSNTISNELRIVQERFHGSVPKKDAEEVAESMNLDKTRVNNWFKNNRKKYIRDKNKRLQLH	Z003_1262	Caenorhabditis_elegans	C07E3.5	Homeobox	Homeobox
311	13E02	pTH10044	TGTCACGGACCTACGGCGCGCCATTCGAAGTTTCGAAGTATTCTTGCT	TAGTGCACCACAATCCTGCAGGCTGGTTCAAGAAGTGCACTTCG	ATTCGAAGTTTCGAAGTATTCTTGCTGGGTGATGGTGTCAAGACATTTGATCAACGGGTTAATTTGATTGAACAATGGGATCAAACGGGCGGTGTGATGCTTGTTGGCTACGATATGTTCCGTCTTCTTATCAAAATGACGCTTCCAAAAAAACAGAAAAAAGGAAGGCCAAAGCTGAATTTATCTGGAATTTCTTCAGGTTTTTCAAAAGATTCTTCTGAAGATCAGAAGCTGAGAGATGAAGAATTAGAGTTTGAAACTGGATTTACAAGTGGCGGAAGAGTTAGACAAGAGGCCTACAGTTTGATCCGAAGTGCACTTCTTGAACCAG	IRSFEVFLLGDGVKTFDQRVNLIEQWDQTGGVMLVGYDMFRLLIKMTLPKKQKKGRPKLNLSGISSGFSKDSSEDQKLRDEELEFETGFTSGGRVRQEAYSLIRSALLEPG	Z003_2521	Caenorhabditis_elegans	C27B7.4	AT_hook	AT_hook
312	14A04	pTH10045	TGTCACGGACCTACGGCGCGCCGACGATGATGACGACTATGCAC	TAGTGCACCACAATCCTGCAGGCGGAGAAGGAGGCTTCAACA	GACGATGATGACGACTATGCACCACCGCCAGACCCATGGAAAAGAAGTATTCGTGTGGATCCAGTACTTTTCCAAGCCGACGTCCCGCTTTTTAATGAAGCAACGGTTGAAGAATCTGCTCGAGAAGATGACACTATTTTATGGACAATTGATCAGACGAATCAGCCAAGTGATGAAGTTATTGACAACTATCTCAAAGATGTAGTAGGCTTACGAAAAGCCCACGACCAACCATGTCCACCAGCTGGCACCGAATCACGAGACGACGAGGACGCTCTATGTGCTTTGTATAGAAGCAACTTTGACACAGAAAAGGCGAAAGAATCATTCCCTTTTCCTCATATAAATGCCCCATTCCGCACTGTTCGCTCAGATGCATTGGGATTCGATGAGAGTGAA…	DDDDDYAPPPDPWKRSIRVDPVLFQADVPLFNEATVEESAREDDTILWTIDQTNQPSDEVIDNYLKDVVGLRKAHDQPCPPAGTESRDDEDALCALYRSNFDTEKAKESFPFPHINAPFRTVRSDALGFDESEAKAFEESLELYGKDFSLIRRLRLPYRKVGELIEYYYQWKLTPGYRVWRDAHPQHAPVVQPHLSAAWHQQAAQLEDQNGQTGFVEASFSE	Z003_5332	Caenorhabditis_elegans	F10E7.11	Myb_DNA-binding	Myb_DNA-binding
313	14E11	pTH10046	TGTCACGGACCTACGGCGCGCCTGCCAAGTTATTCCGGAGACT	TAGTGCACCACAATCCTGCAGGCTTCTGGGACATCCAAAACATTATCT	TGCCAAGTTATTCCGGAGACTTTAAGCCGAATGACACGAACTCCGCCAGATGGAGAGCATTTAGAAGTGTACCGGATGTCAAATGGGAGACTGAGAATATATGTTGTTGATCATTTCAAGAAGTTTTCTCCATACTCCAATTTGACTCATAAGCCATGTACAGTTTGTAATCGAGTAATGAAATCGGGAGAGATGCATCTAAACTTCCCAGCAGACTTGGATAGGCGCAGAATTTGGGCAAATTTGCTTGGATTCAAATACAAAGATATTCTTCGCAGTAAAATGGGTCCTGTATCGTTTTCAATTGCTGCCGGTCCAATTTGTACTGAGCACTTCGCCGAGGAGTGCTTCAGGAATCACAATTTCAACAAATCTGCCATCGAAGCTTTTGGAGTTCCT…	CQVIPETLSRMTRTPPDGEHLEVYRMSNGRLRIYVVDHFKKFSPYSNLTHKPCTVCNRVMKSGEMHLNFPADLDRRRIWANLLGFKYKDILRSKMGPVSFSIAAGPICTEHFAEECFRNHNFNKSAIEAFGVPVAISPDVKTTPSKKSSRVPWVCTVCEFHSCSVVELQTHLLNHTEEMLKKKDNVLDVPEA	Z003_8189	Caenorhabditis_elegans	F44B9.6	THAP	THAP
314	14G09	pTH10047	TGTCACGGACCTACGGCGCGCCATGGTGACAAAACTCTTCACATGT	TAGTGCACCACAATCCTGCAGGCAGACGGAATGTGTGAGAACATATT	ATGGTGACAAAACTCTTCACATGTCCTGGAATCCATCAAAACTGTATACTGATCGATGGTGAAACAGAATACATTAGCCCTAAGGAATTCACTGTAAGAGCAAATAAAGACAAGCAGAAGGACTGGAAAGGGAGCATCAGAATCGGAAAGTCCAATCTTCGAACTTTAATGGAGATGCGGTCTCTCGACTTTCACGATCACCCCAATCAGTGCTCCGCTAAGTGTCAGAGCAGGAATTATATTACACCAAAGGATCCGACTTCTGATCCATCGGGACGAAGGCGTTCTAGCACGACCAAGTTGATACCTCAAAATATGTTCTCACACATTCCGTCTG	MVTKLFTCPGIHQNCILIDGETEYISPKEFTVRANKDKQKDWKGSIRIGKSNLRTLMEMRSLDFHDHPNQCSAKCQSRNYITPKDPTSDPSGRRRSSTTKLIPQNMFSHIPSA	Z003_9079	Caenorhabditis_elegans	F53H4.5	SAND	SAND
315	14H02	pTH10048	TGTCACGGACCTACGGCGCGCCAACGGACAGGCGACCTCCA	TAGTGCACCACAATCCTGCAGGCTCCATCAGTGCTCACTCCG	AACGGACAGGCGACCTCCACCACATCTCCACCATCATCATCATCCCAAGTACAAGCGGTCATCGAAGCAGTCGCCACACCATCATCCCAAAGCCAAGACAGTTCAATGTTTGAGAAAACCGAGACGAGTGGTGATCCGAACGCGGCGCGATGCTCCAACTGCCGAACCGACAAGACAACCGCGTGGCGACGTGACGCCGAGGGGAAGCTTGTCTGCAATCCGTGTGGGCTCTACTATCGATTGCACAAGGTTCGCCGACCAATAGAAATGCGCAAAAACCACATCCAACAACGCTACCGCCGAAAGAACAAGGAAAAAGAGTCGTCGGCGGCAACACAGATCTTCAACCAACTCCTCACACAAATGCCGACGATGGCGACCGGCGGAGTGAGCACTGAT…	NGQATSTTSPPSSSSQVQAVIEAVATPSSQSQDSSMFEKTETSGDPNAARCSNCRTDKTTAWRRDAEGKLVCNPCGLYYRLHKVRRPIEMRKNHIQQRYRRKNKEKESSAATQIFNQLLTQMPTMATGGVSTDGA	Z003_9301	Caenorhabditis_elegans	F55A8.1	GATA	GATA
316	15D04	pTH10049	TGTCACGGACCTACGGCGCGCCGGAAACGTTACCATCAAAGAGGAG	TAGTGCACCACAATCCTGCAGGCCAACATTTGTGCATTTGGAATACG	GGAAACGTTACCATCAAAGAGGAGCCGTACATGTCAAACGTTCTGAACCACGACGACGACCAAACTCATATTTCCGATGAAGGCTTTGGGGAGGAAGATTCTGAGATGCATACAGGAGCATTGCCAAGCATTGATACACCGAAGAAAGAAAGAAAATATGAGAAAGTATCTGAAGATCAAAAGGATGAAAAATATTCTTCTAAACGGGAAAAAAACAACTTGGCAGTTAAACGATGCCGTGAGAAGAAGAAGAACGAAGAAAAATATAAGAAGGAAGCATTTGAGAACTTGATTCGCAGTAATTTGGTCAAGGATCAAAAAATTGAACAATTGAACAATCTGGTTCAGTCTGGAAAACAGAGAGAAAATGCGAGAATCATGGAAGTACAGAGGGAGAAG…	GNVTIKEEPYMSNVLNHDDDQTHISDEGFGEEDSEMHTGALPSIDTPKKERKYEKVSEDQKDEKYSSKREKNNLAVKRCREKKKNEEKYKKEAFENLIRSNLVKDQKIEQLNNLVQSGKQRENARIMEVQREKNILRQLKNELTRIPNAQMLE	Z003_12218	Caenorhabditis_elegans	R07H5.10	bZIP_1	bZIP_1
317	15D09	pTH10050	TGTCACGGACCTACGGCGCGCCATGCTGATTTCTATTGAATTCTGTAAA	TAGTGCACCACAATCCTGCAGGTCACATCGATAAATTTCGATGTAGACG	ATGCTGATTTCTATTGAATTCTGTAAAATTTGCGATCGAAAAAGTCAGGGAATCCATTTTGGGGTGCCCAGTTGTAGAGCATGTGCGGCGTTTTTTCGAAGGAGAGCCGGCTCGGATCTTGTTGAAAAATCATGTATGAACAAAAAATGCGGAAAGGAATTCTTTTTGTGCAAGCCATGCCGTTTGGTACGATGCTATGCAGTTGGAATGGATGAAAAAAAATTCCAATTCGACCGTGACGCATTGGCGTCTACCGTTCTCCTAAACACAATTCCAAAAAGTTTTGACAAATTTGTGGGCCGACCACAATTTGTGCATTTCTGTGATCCAAGTGCTCCGTCTACATCGAAATTTATCGATGTGA	MLISIEFCKICDRKSQGIHFGVPSCRACAAFFRRRAGSDLVEKSCMNKKCGKEFFLCKPCRLVRCYAVGMDEKKFQFDRDALASTVLLNTIPKSFDKFVGRPQFVHFCDPSAPSTSKFIDVR	Z003_12496	Caenorhabditis_elegans	R11G11.2	zf-C4	zf-C4
318	15F11	pTH10051	TGTCACGGACCTACGGCGCGCCATGGTTGCCAGCTCATTTCAA	TAGTGCACCACAATCCTGCAGGCAGCCAACAAACTTTTGAAGCC	ATGGTTGCCAGCTCATTTCAACATCACCTCGAGCCAATGCTAACACAGCCAATTCCGTGCCAAATTTGTACATATCAATCTCATGGGGTTAACTTTAACGTTATGACTTGTAGGGCTTGCGCCGCATTTTTCAGAAGATCTCTTGTGTGCGGAATGAGATACCATTGCAAAACCCGAAAAAATGACTGTAGAATTGACAGTACCGAGCGACACTTTTGTAGGCTTTGCAGGTTTCAAAAGTGCCTACAGATGGGAATGAAGGCAGAAAAAATCCAACAAAATCGTGATCCAATATCTTCAACATTCCCGGGAACATCAACCGAGCCCGAATTGTCTGAAATTGTTGATCCTGAAAACGAAAAAAGTTATATATTTCATGGAACCCTGTATGGCTTCAAA…	MVASSFQHHLEPMLTQPIPCQICTYQSHGVNFNVMTCRACAAFFRRSLVCGMRYHCKTRKNDCRIDSTERHFCRLCRFQKCLQMGMKAEKIQQNRDPISSTFPGTSTEPELSEIVDPENEKSYIFHGTLYGFKSLLAE	Z003_13873	Caenorhabditis_elegans	T13F3.2	zf-C4	zf-C4
319	15H03	pTH10052	TGTCACGGACCTACGGCGCGCCATGTCCTCATCTTCCCTGTCAT	TAGTGCACCACAATCCTGCAGGCCGAGGATGAAGCCGACTC	ATGTCCTCATCTTCCCTGTCATCTTCTTCAAATGCCTCATCGCTCAGTGCTCCAGAAGGGCTTTCACCAAACAACAGCCTCTCCCCGGATGTTGGAGCACAGAGATTTTTCAGCCAAGGGAAAAGGATCCCGAAAGATGTGAAACGGCACTGTGGAATGTGCAAGCAGCATGGAGTTTTCGTAGAGACGCGCGGGCACACCTGCGAATATAGAAGTTGCGAGTGTGAGCAGTGTGACTTGGTCCGTAAGCGACGGGAGATCATGTCAACTCAGATTCGTCTCCGACGAGAGCAAGACAAGAAGTTCCAGCGTACCAATGATATCAGCGAGGCCAACGTGTTCCCAGGCTTCACAGGTGGGGAGGCAGATGAAAAAGCTGTCATGGAGAACATGAACATG…	MSSSSLSSSSNASSLSAPEGLSPNNSLSPDVGAQRFFSQGKRIPKDVKRHCGMCKQHGVFVETRGHTCEYRSCECEQCDLVRKRREIMSTQIRLRREQDKKFQRTNDISEANVFPGFTGGEADEKAVMENMNMCYFCQKCKNHNVLVWKKNHKKECQYSSCECQQCNLIDSRRALDRHIKKRKMSIKGNTVEAIAPKSPKKEGSTTASSSSLSSSSGCNSDESASSSD	Z003_14433	Caenorhabditis_elegans	T22H9.4	DM	DM
320	17A12	pTH10053	TGTCACGGACCTACGGCGCGCCATGAACGAGCCCACGTACAA	TAGTGCACCACAATCCTGCAGGATTGATAAAGGTACGATGGTGACG	ATGAACGAGCCCACGTACAACTACAATGACTTTTTGATGCCTGCATTGGCAGATGGACAACCTGATATTTCAATTGAAATAAGTGAAATTACGAAGAAACAGTGGAATCAACTTATTGGAATTCATGAAGTTGTAGTCTACAAAGACTGCAGAAAACTCTTCCCAGCTGCCAAATTCTCAGTACGTGGTCTCGATCCGGCTCTCCTCTACTCGGTGGAGATTTGCTTTGATGTTCTCAGCCCGTTCACGTTCTCGTATAATAAGAAACTCGAAAAGTGGATTCCAACGAAAACACCCGTCAATTGTCAATCTTCGGCGCTGTCTTCAATGATTTGTGAAACAGGAGATTGGTTTATGAATGGAGATATGGATTTTGGTGCATTGAATATTACAAGCTCC…	MNEPTYNYNDFLMPALADGQPDISIEISEITKKQWNQLIGIHEVVVYKDCRKLFPAAKFSVRGLDPALLYSVEICFDVLSPFTFSYNKKLEKWIPTKTPVNCQSSALSSMICETGDWFMNGDMDFGALNITSSHEKAKEKIEQNRIAVCLSSRTMYQIRVVLYEMQNDELIYLKETKFDEMIFITCTEYRGQVNRELKKSMNRFSRKRKYEISGTKCQRSKRPAKLPVESLDEKELKNAEKGIMSLLESSPSSPSYLYQY	Z003_20098	Caenorhabditis_elegans	ZK829.5	T-box	T-box
1	15G09	#N/A	TGTCACGGACCTACGGCGCGCCGAATCCTCAAATGGAATATTATCCGAC	TAGTGCACCACAATCCTGCAGGTAACGCTGAAAGTTGTCTGCTC	GAATCCTCAAATGGAATATTATCCGACCCATCACTTCATGGATCAAACAGTTCCAGTTCGACTTCGGATGTTGGATCATCGGTCGATTGCAGTATTTCCCCGGAGCCAATCCTAATGCCTTCAGTCAAACGGGGTAGACCTACAGAGAATCCATGTTGGGCTTATTTCCACAGAATTGATGATCAGCTTGTAAAATGTCGGCTATGTACAAAGGTAGTAAGATCGGCGTGTGCAACAAATATGACAAAACATCTCGAAAGACATCACGCAGACGATTATCAAAAAGTGACAGGACAATTGAAACTATTCAGAATGAATGATGTTGGAATTCGAAGTAAAATGCATTATGAAGTGGCGGACAATCCTTTATCAACTCTCCCAGTTGTTACAAACTCTTAC…	ESSNGILSDPSLHGSNSSSSTSDVGSSVDCSISPEPILMPSVKRGRPTENPCWAYFHRIDDQLVKCRLCTKVVRSACATNMTKHLERHHADDYQKVTGQLKLFRMNDVGIRSKMHYEVADNPLSTLPVVTNSYILPKMEPMDTFDPSQYYGMQQDPTLNQQQFIQFEQPQASIDPQTWPLTHFWQNTAQTNIMSHLGEASTSTLGSSVIQEAHKMNPDSNDKSFQLDLEQQNCVIIEQKLDDKPRVTKPTTKPYQKRNRKTEHPVWAFFKRTGDGNAECIICQGVVKSPCSSNFMRHLMRHHSTEYNDVYLKWIEKRNITHPGIHCTSVPPPAFINNETSRTEQTTFSVK	Z003_14348	Caenorhabditis_elegans	T22B3.1	zf-BED	zf-BED
2	16H09	#N/A	TGTCACGGACCTACGGCGCGCCCGGAGCCTATTCTCGGAAAAAC	TAGTGCACCACAATCCTGCAGGTCAACTGAAGAGACATTTGTGGTAC	CGGAGCCTATTCTCGGAAAAACATTTTCCTCATGACAGACAACTACTTCCACCTTTCACTACAACAATGTCTCTTGGCTCGTTCTTTTCTTTTCCAGCGTCCTCAGCGTTTTTTGACAGAAAAAAAGATGATGGAGTTATCGATAACCCAAATGTTGAGCTGGTAAATAGAAATTTATGGAGCACTTTTTTGGAATGTGGAACCGAAATGATTATCACGAAGAAAGGAAGAAGAATGTTCCCGCTGGTGAAGCTCAAATTAAGTGGTTTAGACAAAAACAGCAACTACACAATAATAATGGAAATGATATCAGTAGATAAACTTCGTTACAAATTTTGGAATGGAAACTGGATAGTTGCTGGAGTTGGAGAACATCATCCACTTCCGACATGTTTTGTA…	RSLFSEKHFPHDRQLLPPFTTTMSLGSFFSFPASSAFFDRKKDDGVIDNPNVELVNRNLWSTFLECGTEMIITKKGRRMFPLVKLKLSGLDKNSNYTIIMEMISVDKLRYKFWNGNWIVAGVGEHHPLPTCFVHPQSPRSGEWWMTDGVDFKMAKLSNNPFNNDGHIVLNSMHRYNPRFHIVRADSSGQPILASLKTFSFKETEFIAVTAYQNDVVTKCKIDNNPFAKGFRNIDTVRKRKMNQIISTPPASEDEEPEVKRTKSEIEAVMFSDPKVPQMSLQLI	Z003_19696	Caenorhabditis_elegans	ZK328.8	T-box	T-box
3	16H03	#N/A	TGTCACGGACCTACGGCGCGCCATGGGACCATTGTGTGCCG	TAGTGCACCACAATCCTGCAGGACATTTGAAATGACCAGTCATCCA	ATGGGACCATTGTGTGCCGTTTGTGAATCGCCTACTGCTTTCACTCTACATTTTGGAGGGAGATGTTGTAAAGCATGTGCTGCATTCTTCCGTCGAACAATTGCTCTTGATCTGAAATATGAGTGTGCTGCAGATGATCCTTGTGAAATACATTTCAAATTTCCAGGCATGCGTCTTGTATGCAGAGAGTGCCGTCTTCGCAAATGCTATTCAGCTGGAATGAGATCCGAATTAGTTCGTTCCAAGCGCGAAAACTTTGCATGCACCCGTCGGAAGGATTCCCGAAACAATTCAGATGCAGCACCGAACAGTAATTCTCCATCAACAAGACAGTCTTCGAGCCCAGAAGAAATGGATGACTGGTCATTTCAAATGT	MGPLCAVCESPTAFTLHFGGRCCKACAAFFRRTIALDLKYECAADDPCEIHFKFPGMRLVCRECRLRKCYSAGMRSELVRSKRENFACTRRKDSRNNSDAAPNSNSPSTRQSSSPEEMDDWSFQMF	Z003_19260	Caenorhabditis_elegans	ZC410.1	zf-C4	zf-C4
4	16C10	#N/A	TGTCACGGACCTACGGCGCGCCCTCAAGTTTTCAATCGAAGTCCTTCT	TAGTGCACCACAATCCTGCAGGGAGTCATATGCATTTTGCGAAGATG	CTCAAGTTTTCAATCGAAGTCCTTCTCGCCGATTCGCCATCCCCTAAATCCTTATGCAGATCATCTGGAATTTTTCCATTTCCCTTGCCTTCTTCGAACTCTATATTTGCAGAATCATCTTCAGGTGACGATGAGAATAGTCGAAAGAAATTTCCATGTGAAATATGTGGGAAGCAGTTTAATGCACATTACAATTTAACACGTCATATGCCTGTACATACTGGAGAACGGCCGTTCGTTTGTAAGGTATGCGGAAAAGCATTTCGTCAAGCATCCACTCTCTGCCGTCATAAAATCATTCACACTGACAGTAAACCACATAAGTGCAAAACATGTGGCAAATGTTTCAATAGATCGTCAACACTCAACACTCACGTCAGGATTCATCAAGGATTCAAG…	LKFSIEVLLADSPSPKSLCRSSGIFPFPLPSSNSIFAESSSGDDENSRKKFPCEICGKQFNAHYNLTRHMPVHTGERPFVCKVCGKAFRQASTLCRHKIIHTDSKPHKCKTCGKCFNRSSTLNTHVRIHQGFKPFVCEICGKGFHQNGNYKNHRLTHEDTKKFSCSICSRAFHQSYNLAFHMFTHEEHKPFTCHVCSKGFCRNFDLKKHLRKMHMTQ	Z003_16583	Caenorhabditis_elegans	Y38H8A.5	zf-C2H2	zf-C2H2
5	14A09	#N/A	TGTCACGGACCTACGGCGCGCCATGTCAGATGCTGGACACACT	TAGTGCACCACAATCCTGCAGGAAGGGAATCGATTCGGCGT	ATGTCAGATGCTGGACACACTGGTGTGAATCAACTTGGAGGCGTATTTGTTAATGGGCGTCCACTCCCGGATGCAACACGTCAAAGAATCGTGGATTTAGCGCACAAAGGATGCCGTCCTTGTGATATTAGTCGTCTATTACAGGTTTCCAACGGGTGTGTCTCCAAAATCTTGTGCCGGTACTACGAGTCAGGCACAATCCGACCACGAGCAATTGGTGGCTCAAAACCAAGGGTGGCCACGAGTGACGTCGTCGAGAAAATTGAAGATTACAAACGTGACCAACCTAGCATTTTTGCATGGGAAATCAGAGATAAACTGCTAGCTGATAATATCTGCAACAACGAAACAATACCAAGCGTATCTTCTATAAATAGGGTTCTACGGAATTTGGCTGCA…	MSDAGHTGVNQLGGVFVNGRPLPDATRQRIVDLAHKGCRPCDISRLLQVSNGCVSKILCRYYESGTIRPRAIGGSKPRVATSDVVEKIEDYKRDQPSIFAWEIRDKLLADNICNNETIPSVSSINRVLRNLAAKKEQVTMQTELYDRIRIVDNFPYNSSWYGQWPIPMNGAVGLNPFVPAPLIEPKTEGEFEKDEDQKPPTEPEDDAAARMRLKRKLQRNRTSFTQVQIESLEKEFERTHYPDVFARERLAQKIQLPEARIQVWFSNRRAKWRREEKMRNKRSSGTMDSSLSNGTPTPTPGSVTGSNMTNPIGSPASTPNRFPS	Z003_5692	Caenorhabditis_elegans	F14F3.1	PAX,Homeobox	Homeobox
6	16H12	#N/A	TGTCACGGACCTACGGCGCGCCATGACATCTCAATATTCGAACTACAGT	TAGTGCACCACAATCCTGCAGGATGGACTGCAGAACTTGGAGT	ATGACATCTCAATATTCGAACTACAGTTGTCCGCTCAACAACATCCAAGTCAATGTGATCGGAAGTTCCAGAACTTCAGATGATCATTTCCTAGAACAAATGTTGACAAAAAGGAAGAAGACTAATATTTCTCAAGATCTTCACTACACACTTCTAGGACTCAATCCACGCGATCTTTATCAAATTAGTATCAAATTGGCTCGGATTGATGAGAAAAAGTACAAGTTCAATGGAAATTTCAATGGAGGCGACTATTATCCACATAAAAACTCTGAAATTCCAATGGAGGACACGGAAGAAATTGTGCATTTGGATGGTTATCAAACAGGAGCTAGATGGATGAAAACTGGAGTTTATTTTCCAAAAATTGGAATTTCCAAGGAGCAGCCTGACAAAGAA…	MTSQYSNYSCPLNNIQVNVIGSSRTSDDHFLEQMLTKRKKTNISQDLHYTLLGLNPRDLYQISIKLARIDEKKYKFNGNFNGGDYYPHKNSEIPMEDTEEIVHLDGYQTGARWMKTGVYFPKIGISKEQPDKERCLLLESLHAYVPVLRFTTSSGISLEVTVWSQKFVTTMTSSNRSVKRREKRKLEETTGPSAKKTPEVIEFTQEAVVPEVYNAQQVYQMQNDTMISSDSKFCSPL	Z003_19738	Caenorhabditis_elegans	ZK380.1	T-box	T-box
7	16F06	#N/A	TGTCACGGACCTACGGCGCGCCATGAATCCATCAACTCAAATCGTTGT	TAGTGCACCACAATCCTGCAGGCGTTTTGATTCACAAGATATTGAGACG	ATGAATCCATCAACTCAAATCGTTGTGAAAATGTCAAATGAAGAACTATGGAAAGAAAGATATCCAAATATGGAAATGATTTCAAACAGTAAAAGAATTACTCCAATTTTCCCTGAAATCAAATTCAAAATCTCTGGATTGGAAGAAAATTCAAGATATGTATTGGTACTGTCACTTGAAAAGATGGATAATATCAGATATGGAATAAATGAAAACAAAGAATGGGCTCCATCGTCTGCTCGTAAACCAAAACCACATCATAATATGAAGTTTTTCTTTCATCCAGAAGGAACAAAACTTGGAAAAGAATTGATGGCTGAAACAGTTGAATTCACTTCAGTGAGGATTACAACAAGTGAGAAATTATCAGAAAAGGAGAATGTGTTCTATGTTCACACA…	MNPSTQIVVKMSNEELWKERYPNMEMISNSKRITPIFPEIKFKISGLEENSRYVLVLSLEKMDNIRYGINENKEWAPSSARKPKPHHNMKFFFHPEGTKLGKELMAETVEFTSVRITTSEKLSEKENVFYVHTMHKYVPVLTIRNLTTGEIASNIFKMEIAQFFPVSIYQQASMGRWKSDLNKHSTFGNRSEGGIKRKTSDAAGQLPSKRSSKKPVKKDVVDNSEVTLEVKTSQYLVNQNE	Z003_18149	Caenorhabditis_elegans	Y59E9AR.3	T-box	T-box
8	13C10	#N/A	TGTCACGGACCTACGGCGCGCCTTGTATGATTATGACTACGTTTTAAAT	TAGTGCACCACAATCCTGCAGGCTTGCAGTGTTGGATTACTTATAGTAA	TTGTATGATTATGACTACGTTTTAAATAACGAAGCAGAAAAATATGATCTGTTGAAAAAATTTTGCAAATTTGTATCCTCAAAAAAAAAGTGGATTTCTCAATTTTATTTTAAAAGAATAATGCAAAAATATTCTGATATTATCAAAGATTTTGGAAGTCAACCAAAACAAGTACTGACTTGCGATGCCTGTAAAATGTTCTTCCGCCGCGTTGTCACTGAAAAGCTCGAGTATACTTGTAAATGTTCAAATAACTGCTTTGAAGGTTTCTCCGAAGATTCTACAATTTACCCAAAGTGCAAGTCATGCCGCTACCAGGAGTGTCTGAAATTTGGAATGAACTATGCCTTTCGAAAACAGAAGCGGCTTTTGGAAATCAGAAATAAAAAGGATGACGAG…	LYDYDYVLNNEAEKYDLLKKFCKFVSSKKKWISQFYFKRIMQKYSDIIKDFGSQPKQVLTCDACKMFFRRVVTEKLEYTCKCSNNCFEGFSEDSTIYPKCKSCRYQECLKFGMNYAFRKQKRLLEIRNKKDDELDAIIDGLRYLDNHRRETLRTKFTISNPTLQE	Z003_2018	Caenorhabditis_elegans	C17E7.7	zf-C4	zf-C4
9	14E03	#N/A	TGTCACGGACCTACGGCGCGCCATGACTGACCTCTCTTGTCTGTAT	TAGTGCACCACAATCCTGCAGGAGTAGTATTGGGAGAGGTCATGG	ATGACTGACCTCTCTTGTCTGTATCCTTCACTTTTATGCACTGAAGCTGCAAAAACATCTTATGACGAAGACACAACGTCTGTTTCATCTGGTTTAAGCCCTCCGGGCTCTCCAGTCGATCTACAAAACTCGCTGGATCATGTGAAACGGCCGATGAATGCATTTATGGTTTGGAGCAGAGGACAGAGAAGGAAAATGGCACAGGATAATCCAAAAATGCACAATTCCGAAATAAGTAAACGGTTGGGTGCAGAATGGAAACAGCTATCAGAGCAGGAAAAACGACCATTTATTGATGAAGCAAAACGGCTCAGAGCTTTACATATGAAGGAGCACCCAGACTACAAATACCGTCCACGAAGAAAGCCAAAATCCTCCAATCTGAAGCAACAACCTCGT…	MTDLSCLYPSLLCTEAAKTSYDEDTTSVSSGLSPPGSPVDLQNSLDHVKRPMNAFMVWSRGQRRKMAQDNPKMHNSEISKRLGAEWKQLSEQEKRPFIDEAKRLRALHMKEHPDYKYRPRRKPKSSNLKQQPRLNIAMPTIPPQSLFNYSTAFDSLKTHDLSQYYS	Z003_7795	Caenorhabditis_elegans	F40E10.2	Sox	HMG_box
10	14H06	#N/A	TGTCACGGACCTACGGCGCGCCATGTGCTCAATTTGTAATGTGAGAGA	TAGTGCACCACAATCCTGCAGGGCTCGGCGATCTCTGCAAC	ATGTGCTCAATTTGTAATGTGAGAGAGAGTTCCGGCTTCAGCTATGGGGTGTTGTGTTGCGGAGCCTGCAAGATGTTTTTCCGACGAGCTCTGTTCGTAAAGAATATCGATACCTGCCGTCAAAAAGGCGAATGCATAAAAAAATGTCGCTATTGCCGATTCCAAAAATGCATTCAAGCCGGAATGTCCTACACACCAACTGAGAATCTATTGGAGCTCAAGAACAATGACTCGCTGTCAGCGTTCATATTCAATTTGGCTCATCAAGACGAGCTCCGAAAGTATCAATTGATGAATTGCCGGTATGATGGAGATCCGACTGTTGCAGAGATCGCCGAGC	MCSICNVRESSGFSYGVLCCGACKMFFRRALFVKNIDTCRQKGECIKKCRYCRFQKCIQAGMSYTPTENLLELKNNDSLSAFIFNLAHQDELRKYQLMNCRYDGDPTVAEIAEH	Z003_9622	Caenorhabditis_elegans	F57A10.6	zf-C4	zf-C4
11	15B01	#N/A	TGTCACGGACCTACGGCGCGCCATGTCAATAAACTATTTTAAATTTGAT	TAGTGCACCACAATCCTGCAGGATACTGGAAAGTTCGGAGTTTTACAG	ATGTCAATAAACTATTTTAAATTTGATTGCGATGATGATCTGTGCAAATATCATGGAATAGCTCATCTACACTGCGGACACAAACGGTGTAACTTTGCATCAAATGATGCTCTTTTGATATCAAATCATCTTTCCGTGTTCCATTTAAAAAACTCTGAAATTCCTGACGACCGAATATTCTATCATATCGACGTCTCATGTGGATCTGACAGGTGTCAGTTTAACCGAAACAGTTCTCATTGGCACTGTGCCAAATGTCAAACGGGATTTGAAATTGTTGGTCTCCATTGTTGTCCAATCACTTCCCTTCCCAAACGGCTTGATTCCTGTTCTCGTCCGTTCTGCAAGCTCAAAAAGAAAGCACACTTTCATTGCAAAATTTGTGATCAGGTAGTTTGG…	MSINYFKFDCDDDLCKYHGIAHLHCGHKRCNFASNDALLISNHLSVFHLKNSEIPDDRIFYHIDVSCGSDRCQFNRNSSHWHCAKCQTGFEIVGLHCCPITSLPKRLDSCSRPFCKLKKKAHFHCKICDQVVWNTNQMHLRTLHFLILIGIFIGGQTLGCMKKVCGNNAKNDFRRCPDTDGSCGNYHTERTSGEIIDGVDVRCHLGEPIYAPIEGEMYFWRPYGGKREKSCADQGVRIEGTGQWQGYAVHISSVKLSFFGGHVEAGDEIGEALNRYCFNDRGQNDVEPHVEIRLYKEGRLIDPTHHLQNCMCTGQICESNTRNVLLGDPFKTDKRYNGVRGWDVECQMIDDDDEDSPRAPMIYSPIAGEIVGRIRLFTDSNGAYTGCDNDGIFIVGIDD…	Z003_10750	Caenorhabditis_elegans	K05F1.5	zf-C2H2	zf-C2H2
12	15F06	#N/A	TGTCACGGACCTACGGCGCGCCATGGATTGCATCACTCGTTCC	TAGTGCACCACAATCCTGCAGGTGGGCTCAAATGGGAACGA	ATGGATTGCATCACTCGTTCCTGCAAAGTGTGCAATGAGAAAACTACAGGATTTAATTACGGTGTGCAATCATGTAATGCTTGCAAAATGTTTTTCCGACGAGCTCTCGACACCCCAAAAGTTCTCAAATGTGGTCGTGATGGAAACTGCCCAACAATTGTTCTGGACAGTGGAGAATCTCAGTGCAGGTTTTGCCGTTTCCACAAGTGTATCATTGTTGGTATGATTTTTTTGGATGCTGTGGATGATCCAACAAATATAATCAACAAGTTACTTGTTATGGACACAAAACGAAGAGATATATTTTTGAATTGCACGATTCCTGAAAGTCTGACAGTCGATGAAGTTTTCAGCAGACGTTCGTTCCCATTTGAGCCCA	MDCITRSCKVCNEKTTGFNYGVQSCNACKMFFRRALDTPKVLKCGRDGNCPTIVLDSGESQCRFCRFHKCIIVGMIFLDAVDDPTNIINKLLVMDTKRRDIFLNCTIPESLTVDEVFSRRSFPFEPR	Z003_13367	Caenorhabditis_elegans	T07C5.5	zf-C4	zf-C4
13	15G05	#N/A	TGTCACGGACCTACGGCGCGCCTTGTACATTTTTCAAAAATTGTTGATC	TAGTGCACCACAATCCTGCAGGTATCAACGTTAATCAAAGTTTTTGGTG	TTGTACATTTTTCAAAAATTGTTGATCCTCACTCAATTGATGAGATCTCTCTTCGCATCGTATCATTTATTTTGTTGTCTGCGTCTCAGTGACTATTCTCACACAAAACCTGCACTACTTTTCAATTCGAAAACCATGACGAAAATCTTGTTTCCTTGTCGAATTTGTGGTAAAAAAGCACATGGAACACATTTCGGAGTGTTCAGCTGTAGGGCCTGTGCTGCGTTTTTCAGGTTAGTTTTTTCCTTAATATTAGGGATGGCAATAAGTTTTCGTAGTTGTATGGAAATTTTTGTTAAATGTTTGGCAAAGGGTGGAAGTGGAAATGAATGTTTATGCAAGCCTTGCCGACTTAAAAAATGTTTTGAAACAGGGATGGATCCCTCAAGTTTCCAATAC…	LYIFQKLLILTQLMRSLFASYHLFCCLRLSDYSHTKPALLFNSKTMTKILFPCRICGKKAHGTHFGVFSCRACAAFFRLVFSLILGMAISFRSCMEIFVKCLAKGGSGNECLCKPCRLKKCFETGMDPSSFQYNRDSIWGVAQSPVPPSFSYFVGRPEFLILCDPIRCSPKTLINVDN	Z003_14142	Caenorhabditis_elegans	T19H12.8	zf-C4	zf-C4
14	16C01	#N/A	TGTCACGGACCTACGGCGCGCCAGAGACTCGATGACTCCAAGC	TAGTGCACCACAATCCTGCAGGTCCCACTTGGAAGGCTCTG	AGAGACTCGATGACTCCAAGCTTCAGTCAAACCGAAAGCCCAAACTCTGAAACCGACGACTCCACTTCTGCAGCAAACAAAGTTCTATTCTCTATTCTTGGAACTCCAACAACAGACAGTACTTCGAATGCCGTTTCAAAATCCAGCAGCAAGCTGTGCTCGGTATGTGGTGACAAGTCAACCGGTCTACATTACGGTGCTGCCACCTGTGAAGGGTGCAAAGGATTCTTCAAGCGGTCCGTTCAAAACAAAAAAGTATATCACTGCAGTCAAGACAACTGCTGTGAAATTGACAAACAAAATAGAAACAGGTGTCAATCTTGTCGTTTCCGAAAGTGCATCAGCAAGGGCATGCTAACCGAAGCAGTGAGAGAAGATCGCATGCCCGGCGGGAGAAAT…	RDSMTPSFSQTESPNSETDDSTSAANKVLFSILGTPTTDSTSNAVSKSSSKLCSVCGDKSTGLHYGAATCEGCKGFFKRSVQNKKVYHCSQDNCCEIDKQNRNRCQSCRFRKCISKGMLTEAVREDRMPGGRNGNSIYSNYKQRRSIIRKTKDYVEEQERRPFQSLPSGK	Z003_16025	Caenorhabditis_elegans	Y15E3A.1	zf-C4	zf-C4
15	16C03	#N/A	TGTCACGGACCTACGGCGCGCCATGGATCTCATCGCATCGACC	TAGTGCACCACAATCCTGCAGGCTGTACAATCGATGAGATCCTTCTC	ATGGATCTCATCGCATCGACCTCAATATTATCCCAGGAAGAGTCATCGGAGCTTATTTGTGCTGTGTGCTCACAGCCGGCACGTGGAAGACACTTTGGAGCAGTCGCCTGCCGGGCTTGTGCTGCATTTTTTAGACGCGCAGACGCCGCCAAAACCACAGTAAAACCGTGTAAAAAAGGCGGAAATTGCCAAAACTTGCTGAATAATAACGGATGGTTTGACTGTAAATTTTGTCGACTTCAGAAGTGTTATGAAATTGGAATGAACTCAGCAAATTTCCAATTCGACAGGGACCCGATTAGCACTAAGCTCACAAATGTCCCAAACAGTATGGAAGGTTTTCTGGGCCGCCCGCACTGTGTAATTTTTGTGGACCCGGAAGTTGTCCGCTGCGAGAAG…	MDLIASTSILSQEESSELICAVCSQPARGRHFGAVACRACAAFFRRADAAKTTVKPCKKGGNCQNLLNNNGWFDCKFCRLQKCYEIGMNSANFQFDRDPISTKLTNVPNSMEGFLGRPHCVIFVDPEVVRCEKDLIDCTD	Z003_16034	Caenorhabditis_elegans	Y17D7A.1	zf-C4	zf-C4
16	13H06	#N/A	TGTCACGGACCTACGGCGCGCCCCTTCTTTCTCTTCCGATTACCCT	TAGTGCACCACAATCCTGCAGGTGAGTCGTAGGGTTTGTCGC	CCTTCTTTCTCTTCCGATTACCCTGTCGAACTGTCTTACGCACCTTCAAATTCGTGGTCAACTCCCAACTCGACACCATCACCATCATTATCAAAATCGAGTTCGCCAAAGCCAACCGTGTCACAAGCTAAAGAACGAAGAGTTTTCGATCTACCATGTGCAGTTTGCTTATATCCAGCCACTGGCTATCATTATAACGTAGCATCTTGCAACGGATGCAAAACGTTTTTCAGACGGTGTGTTCTCTCGGGCTCTAGTTACCGATGTATTCGCGGCGATTCAAATTGCCTGTTAAACATGCGTCTCGTGGCGGGAGCACGAATCAAGTGTCGCAGTTGCAGACTAGATCGTTGTCTTCAACAAGGAATGCGAAAAGAAGCAGTCACGTCAGGAATAGTT…	PSFSSDYPVELSYAPSNSWSTPNSTPSPSLSKSSSPKPTVSQAKERRVFDLPCAVCLYPATGYHYNVASCNGCKTFFRRCVLSGSSYRCIRGDSNCLLNMRLVAGARIKCRSCRLDRCLQQGMRKEAVTSGIVGNEEKVAPQTAYLASISLPSTSTAIPKVTETASCLRQTLRLI	Z003_4395	Caenorhabditis_elegans	C56E10.4	zf-C4	zf-C4
17	16D11	#N/A	TGTCACGGACCTACGGCGCGCCTCCCAGTTCTTCTCCGAGG	TAGTGCACCACAATCCTGCAGGTTTGGTCCATTTTTACCATGGAGG	TCCCAGTTCTTCTCCGAGGCCACAATTCGTGACCTGATGCCTGTTCTCGCGTCTGTACAAGGATCCCCACCACACAATCAGAATCAGCTCAGCTTCGGATCCACGTCATCACCGTCGGCGTGGGCGAGGAATGCCGGAAGGAAGAAGTCGCATCCAGTTTGGGATTTCTTTAAGGATATGAAGGATAGCACCGGTGCCGGTGGAGTCATCTGCCTACACTGCTCGTGGAGCGGCGACGATCGGAGCCCGAACAACCTGCGAACACATCTCAAGAAGTTTCATTCGGACGACGGGATTTTCAATCGATTCAGCGAGAAGTTGGCTAAGATGGCCCGTCGAAAGCAACAAGAGTCCACGCTAGTCATAGATCCGTCCCACTCCAAGGATGACTCGGCATTC…	SQFFSEATIRDLMPVLASVQGSPPHNQNQLSFGSTSSPSAWARNAGRKKSHPVWDFFKDMKDSTGAGGVICLHCSWSGDDRSPNNLRTHLKKFHSDDGIFNRFSEKLAKMARRKQQESTLVIDPSHSKDDSAFFEGSSGSDAPSTIDTTQLMALLEQSAAAAAAAAAASSSENPITSSLLKKDRTTTTTTEKELSPLTAARASEILFAAGMRPHKKTSEIWEHYKCLNEKQNVECIYCWKVLKRNDSSTKSMWGHMNAYHQDILRDGTTRKKVKRPANGLDFDETPTQPYVKRVRGGAGSSSSLPSMVKMDQK	Z003_17190	Caenorhabditis_elegans	Y47D3B.9	zf-BED	zf-BED
18	14G01	#N/A	TGTCACGGACCTACGGCGCGCCATGCCGACGACTTGTGGAT	TAGTGCACCACAATCCTGCAGGCGTTTAAAGCCTGTTGTGGATCT	ATGCCGACGACTTGTGGATTTCCGAACTGCAAATTTCGCTCTCGGTATCGTGGTCTTGAAGACAATCGCCATTTCTATCGAATCCCAAAAAGACCGCTTATTTTACGACAGAGGTGGCTCACCGCAATTGGAAGAACTGAAGAGACGGTTGTTTCACAGCTTCGAATTTGCTCGGCTCACTTTGAAGGAGGCGAGAAGAAAGAAGGAGATATTCCAGTTCCTGATCCGACGGTGGATAAGCAGATCAAGATTGAGCTGCCTCCAAAAGAAAGTAAGAACAGTGATCGACGAAGGAAGCAAAACATTCCGGCTAGATTTCCTAGACCAGAGTCGCCGTCAGGTGACAGTCCATCGTACTCAAAGAAGAGCCGGAGTTTTCGTGACTTCTATCCTTCATTA…	MPTTCGFPNCKFRSRYRGLEDNRHFYRIPKRPLILRQRWLTAIGRTEETVVSQLRICSAHFEGGEKKEGDIPVPDPTVDKQIKIELPPKESKNSDRRRKQNIPARFPRPESPSGDSPSYSKKSRSFRDFYPSLSSTPSFDPAQSPHTPHPPVLPDPQQALND	Z003_8742	Caenorhabditis_elegans	F49E10.5	THAP	THAP
19	15D05	#N/A	TGTCACGGACCTACGGCGCGCCATGGATGAACTGAACGCTTGC	TAGTGCACCACAATCCTGCAGGCGGAAGTCGTTGCTTGAGTAC	ATGGATGAACTGAACGCTTGCACAGAATGCGGATTCACGACTACTGTATTTTCCGAGTTTCAAGGACATATAGAGAAGCACGAAAACGAGCACAGCAGGTCTTCAAGCGGAGAAATGTCTAACTCGCAGACAATCGAGTGGGGAGATGGTATTCAGTCGTCCACGCCGTCGCCACGGTCCACGCCCCCTTCAGATCCAACGCCGAGTCCGGACTCGGATGAACATCTTGAACATCACATTTCGATAACAGAAATCACAAACACTCTCATCAAAAAAGAACCAGGCACCAAAGGACAAAAGACGGTTCACGTTTGCCCGCACTGTAATTTCACCACTTGTATGTCGCAACACATGAAAAGCCACTTGGAAGCGCATGAACGCCATCAAGGCCAAATGTAC…	MDELNACTECGFTTTVFSEFQGHIEKHENEHSRSSSGEMSNSQTIEWGDGIQSSTPSPRSTPPSDPTPSPDSDEHLEHHISITEITNTLIKKEPGTKGQKTVHVCPHCNFTTCMSQHMKSHLEAHERHQGQMYQCDICKMQFSQKANMHRHRMRHSGVKPYECRFCKKRFFRKDQMQEHSMTHIKTGFGFDCPVSQCNMQFSQHNALRAHLEETHTISSTNPASCKRCNLMFANSRRLLLHFQTRHDDSESSPKKENTPKRKKLSNGNALPMDPANMSITEQLQRMVKSEFSPPNTDTSDNSTSSEFDKIPPSFPMANPDILLMCLNQMNQFNGFGENIPRPMLNIPNIPLPALHNIPAVAAIVKQDQVQLWSEQTSSSVSVSAPSPSEQSHSPPANES…	Z003_12260	Caenorhabditis_elegans	R08E3.4	zf-C2H2	zf-C2H2
20	13A06	#N/A	TGTCACGGACCTACGGCGCGCCATGCAGGAACTCAGCCAACT	TAGTGCACCACAATCCTGCAGGGTTCCACAGAATTTCCGTCCG	ATGCAGGAACTCAGCCAACTTGGCGGATATTTTCAAAAACTTGCTGCAGGCGGATTCGTGATCAACCCATCTTCTTCTTCTTCCTCATCGAACAATTCCTCATCTAACACTTCTTCGTCCAATTTTCTATCTCCATATGAGTATCAAGAATCCTCGACCTCACCACGTGACACTACAGATTCATCTGGTGAATCCTCGTTGTCCTCTTCTGGCTCTTCATCTTCACTGAATGGTTCTTGTAATGTTGCAGCCAAGTTGATCAAGTTCCGCGGGCATAACGTCGCCGCTTTTGACATAAACGGCAAAGAAATGATTTGTTTGCCTCAGGTGTACGAGGTATTTCTCAAAAATATGGTAGGAGGACTTCATACGGTATACACTAAACTCAAACGGTTGTAC…	MQELSQLGGYFQKLAAGGFVINPSSSSSSSNNSSSNTSSSNFLSPYEYQESSTSPRDTTDSSGESSLSSSGSSSSLNGSCNVAAKLIKFRGHNVAAFDINGKEMICLPQVYEVFLKNMVGGLHTVYTKLKRLYIHPMVCNVEQVRALRSLGAIQPGVNRCKLLKTSDFEKLYDDCTSTCTRPGRPSKRSFDDWNNGAVIIKKDKTDSEPVNGPVFNQLMQPQMTPQQILMQHFVALSQKTKNSFERADDDDQNQRDADDITPLNLSKSGGNSENDSDSLENMRKEDSSPNTSVSDRGGSNSNSLSMSMEAGSSSSSGKNDEASMMNKVMSLIELASQQFKHEREELWKERSEIQVLRESFHKIVQEERDLRKKLETQNKKCTAFEKRYKYVKKQLLLAN…	Z003_393	Caenorhabditis_elegans	B0412.1	Ski_Sno	Ski_Sno
21	14C01	#N/A	TGTCACGGACCTACGGCGCGCCGTGCACAAATCAAGAAAACGAAAGT	TAGTGCACCACAATCCTGCAGGTTTTCCGCATCGAAAGCAGAT	GTGCACAAATCAAGAAAACGAAAGTTGATGGTAACAGAGGACCAATGGGGTTCACAAATCACTATTCCAAAAGTGATACAGAACAGACCGCTGATTGAAAAGTGGTTTGTTCAGAAAAGATTCAAGATGGTTAAAGTTCGGAATATCCAACGCCCTCAGTTGTCCTATCAACTTCTAAGTGCATTGACATGTCTTAATTCTCCAGATGGAATGATATCTACAACAGAAAATTATTCGTTCATTTTACATCACTGGCGTTATTATCGCTACGCAAATGAAAATTGGAAAAACTCGGTCCGTCATGTACTTTGCAAATGTCAATTATTTGATGTTCTACAAGTTGAAGGTTTATCGCGGAAGGGGAACGTTTATAAACTGAAAAGGCCCGACAATGTTGAG…	VHKSRKRKLMVTEDQWGSQITIPKVIQNRPLIEKWFVQKRFKMVKVRNIQRPQLSYQLLSALTCLNSPDGMISTTENYSFILHHWRYYRYANENWKNSVRHVLCKCQLFDVLQVEGLSRKGNVYKLKRPDNVEKEMIDVKTLGCMQKDSRGIDFYIKMLAGQIGLPRHLFYSIVGNEMPEYAGPENSAIFYHLLSMRKI	Z003_6598	Caenorhabditis_elegans	F26A1.2	Fork_head	Fork_head
22	15D12	#N/A	TGTCACGGACCTACGGCGCGCCCCACCAAAACCCAAAGATCCAG	TAGTGCACCACAATCCTGCAGGGAGATGGTCGGTTTCCAAGATG	CCACCAAAACCCAAAGATCCAGCATTACAAGCTTCATCTCAACCGACCGGAACACTTCCTGTTCTAACGTCACCTTCTTGCCCTCAAAATGGACAACAACTGCCAACTGAAAACAACAACTTCATGTTCTCTCCGAATTCTTCTGACGGATCAATGTGGCCACCACAAGGGGTCCCAATGAGCACGCCGGGCTCTTCGGCCGGTCACATGCCACTAGGTGCCGGCGCCGCCTCCTTCCCCGGACAAATGAACGGACCTCCTCAACACCCTGGAATGCAGTATTCTGGACAAATGCAACAGTTACCCTATGGTCAAATGGAGGGCAACCATGCCATGTATGATCAACGAATAATGGGACAACGAGCCGCTGGACGGCCTGGCATGATGCCCGATTACCCG…	PPKPKDPALQASSQPTGTLPVLTSPSCPQNGQQLPTENNNFMFSPNSSDGSMWPPQGVPMSTPGSSAGHMPLGAGAASFPGQMNGPPQHPGMQYSGQMQQLPYGQMEGNHAMYDQRIMGQRAAGRPGMMPDYPQMPMGQTPGNTMMRMPVQYPSGPSQMAGHPHMQQMQYGHMMRAPPVSVYGQMNNAQQYAVTAHPNPVPQPYYHPEVRQLYETTAGYIVDRELLAEGHVTPGSNGVEAMLTHDASDFLKVSPQTDVLFSIWPVTKSNDPNIQYEVYINQKSVMNSHMQVKSIFIKDFLISGMNSIHIVYNGPQQMYKYACEFVTRKSVIELRKILIQKRVIEGQQLATQQKQQYMQMANKRQAGFYPVSLNCVLSKKRMFTPAKHHECKKIFDLAQL…	Z003_12557	Caenorhabditis_elegans	R13.4	zf-MIZ	zf-MIZ
23	15C09	#N/A	TGTCACGGACCTACGGCGCGCCTGTAAAGCCAACTACATTCCACC	TAGTGCACCACAATCCTGCAGGGTGGCAGTGTTGGCAAGTT	TGTAAAGCCAACTACATTCCACCAACAAAAATCACGGAACAAAATGATGAAGACGTGCGTCAGTGTCTATGGGACGGGTGCACATTGACACTTGACGATCGAGCGACGTTCTTCGTGCACGTTGATAATCACATCCAAAAGAATGAGGTAAATTGTAAGTGGAGGTATTGCGAGCGATCATTCAAGCAAACCTACGAGTTTACAGCTCACAAGCGCACCCACACAAAGCAAAAATTATATTGCTGCGAAGTTTGTCCGAAACGATACGGTCGATTAGAGAATCTGAAGACTCACAGACGTACTCATACAGGTGAGAAACCGTACCACTGCAATGTACCAAATTGTAACAAAAGCTTCACCAATGCTTCCGATCGTTCCAAACATTCAAAGCGCACCCAC…	CKANYIPPTKITEQNDEDVRQCLWDGCTLTLDDRATFFVHVDNHIQKNEVNCKWRYCERSFKQTYEFTAHKRTHTKQKLYCCEVCPKRYGRLENLKTHRRTHTGEKPYHCNVPNCNKSFTNASDRSKHSKRTHSNEKPYCCDFGSCACAYTDPSSLRKHVKSKHPEHHAMKMAMRKTQRKSIKQIASEKVQMSPLPTAAEAPISPQQNLPTLPL	Z003_11730	Caenorhabditis_elegans	M163.2	zf-C2H2	zf-C2H2
24	13D11	#N/A	TGTCACGGACCTACGGCGCGCCTTTCAACCAACTACTCGAATTCCC	TAGTGCACCACAATCCTGCAGGGATTTATTGGTTGAGATGTTGATGCAT	TTTCAACCAACTACTCGAATTCCCACATTTACATATGAACAATTCAACGAATCCGTCGAAATTCTTCCAAGTCGTCCCGAATGTCTTTATCGTCGAAATGATCCAACAAATCGAAGTTATCGAATGAAAAAACGACCACCGGCACAAATATATCATTGTGTTCAATGCAATAAGCACATAAAATATCCATCAAAAATAACTGAACACATTCGAAAACATACTGGAGAGAAGCCAAATGTTTGTTCAATTTGCAATATAAGTTTCAGTCAAGCACATACATTAAAAACTCATATGCAGCAACATGCACATGAAAAACCATACAAATGTTCATTTTGTACGGCTGAATTCTTGAATGTTTATGAAAAGAATGAACATGAAGAGCAACATATGCATCATCCA…	FQPTTRIPTFTYEQFNESVEILPSRPECLYRRNDPTNRSYRMKKRPPAQIYHCVQCNKHIKYPSKITEHIRKHTGEKPNVCSICNISFSQAHTLKTHMQQHAHEKPYKCSFCTAEFLNVYEKNEHEEQHMHHPNHGETMEENNATTSQFIQVAEPTIQAEPCQIYECSEMCGFQSYEEAEVVEHMTVTHYQQTKKSKEIPKLKNPGFSINFNYFQVQNGLILQDFNGEPEPIYEFYEEQYVQQVPTEIEETPTIKQQSIPYENLHFEHVEAAPGPSEPHLQVVAEGEILYDGEEIVDISNGKSLKEEIQNGDANIYGMIQDLEEEVEDIGNEDEERERVRIMVNPNPPKRGTKSLRDHHEATAATMEMIVDASILELAEPSRHLKQGYPPISKRKNTGK…	Z003_2494	Caenorhabditis_elegans	C27A12.2	zf-C2H2	zf-C2H2
25	13C04	#N/A	TGTCACGGACCTACGGCGCGCCTCTCCAAATGGAACACCAAATATTG	TAGTGCACCACAATCCTGCAGGGCATGTAAGCTCGAGCCTGA	TCTCCAAATGGAACACCAAATATTGCGTCAAGTATGTATCCTGCATGGGTGTTCAGCACAAGATATTCCGATCGACCATCTGCAGGCCCTCGACATCGAAAATCCCGAAAACGAGAATCAACTGGAAGTAGTGGAAGTTCAGAAGAAGAAAAAAGACCACGTACTGCATTCACTGGAGATCAATTGGACCGGCTCAAAACTGAATTCCGGGAAAGCAGATATCTAACAGAAAAGCGGCGACAAGAATTGGCTCACGAGCTCGGACTCAACGAATCGCAGATCAAAATCTGGTTCCAGAACAAGCGTGCCAAACTCAAAAAGTCGACATCTTCTGTTCCAAGAGATCGATGCTCCTCCGTCACTCCAAATCCTCATAATCATCCGTCAATTCATGGAGGA…	SPNGTPNIASSMYPAWVFSTRYSDRPSAGPRHRKSRKRESTGSSGSSEEEKRPRTAFTGDQLDRLKTEFRESRYLTEKRRQELAHELGLNESQIKIWFQNKRAKLKKSTSSVPRDRCSSVTPNPHNHPSIHGGYQLMAQLAKVQARAYMP	Z003_1696	Caenorhabditis_elegans	C13G5.1	Homeobox,CENP-B_N	CENP-B_N
26	16G06	#N/A	TGTCACGGACCTACGGCGCGCCGACGAAATGAACGAGAATCGGC	TAGTGCACCACAATCCTGCAGGTGCCGAGTTTTGACTTGAGC	GACGAAATGAACGAGAATCGGCTTACAGAATACATTTCAGAAGCTACTGGACGATATCAATTACCTATAGATAGGGCTCTGTTCATTCTGAACAAACAGTCAAATGATTTCGACGCTGCGATGGTTCAAGCGATGAGAAGAAAAGAAATTCATGATGATTGGACGGCAGAAGAAATTAGTCTTTTCTCCACTTGCTTCTTTCATTTCGGAAAACGGTTCAAGAAGATTCATGCGGCTATGCCCCAACGCTCGCTTTCTTCCATTATCCAATACTATTACAACACGAAAAAAGTGCAAAACTATAAAACAATGATTAATGTGCATTTGAATGAAACCGACACTTATGATGAACTATTCAAAGAGGTCAATCATTTGGAGAGGGTTCCGTCGGGATATTGT…	DEMNENRLTEYISEATGRYQLPIDRALFILNKQSNDFDAAMVQAMRRKEIHDDWTAEEISLFSTCFFHFGKRFKKIHAAMPQRSLSSIIQYYYNTKKVQNYKTMINVHLNETDTYDELFKEVNHLERVPSGYCENCNAKSDLLILNRVMSRHECKPCILYFRLMRVPRPASLRALTKRRQRVLCPEYMKIYVYGYLELMEPANGKAIKRLGIGKEKEEDDDIMVVDDCLLRKPSGPYIVEQSIEADPIDENTCRMTRCFDTPAALALIDNIKRKHHMCVPLVWRVKQTKCMEENEILNEEARQQMFRATMTYSRVPKGEIANWKKDMMALKGRFERFTPELDTTATNGNRSGKVRINYGWSPEEKKNAIRCFHWYKDNFELIAELMATKTVEQIKKFYM…	Z003_18775	Caenorhabditis_elegans	Y74C9A.4	Myb_DNA-binding,GATA,Myb_DNA-binding	Myb_DNA-binding
27	17A10	#N/A	TGTCACGGACCTACGGCGCGCCATGTATAATGATGATAAAGACGATCCG	TAGTGCACCACAATCCTGCAGGCCGGCGCCTCGTCGTAACTA	ATGTATAATGATGATAAAGACGATCCGTTTTACGAAGACGAAGGAAGTGGCGGTGGAACCAGCGGTGGCGGTAAGAAATCCAGCCGCAAACGTGCCAACACGACAAGTAGCAGTGGGGGCAATGAGAAAGAAAGTAAAAGAACTGCAAATAAGGTGTGCCGAGTATGTGGCGACAAGGCGTTCAGCTATAATTTCAATGTGATCACCTGCGAGTCATGTAAAGCGTTCTTTCGGCGCAATGCTAACAAAGAGAAAGAGATTCGGTGTCCGTTCAACGAGCAATGTGAAATCAACATGGTTTCGCGTCGGTTTTGCCAGCGTTGCCGGCTCACCAAGTGTTTTGCGGTTGGCATGAAGAAAGAATGGATCATGTCGGAGGAGGCCCGGCTTGAGAAGAAG…	MYNDDKDDPFYEDEGSGGGTSGGGKKSSRKRANTTSSSGGNEKESKRTANKVCRVCGDKAFSYNFNVITCESCKAFFRRNANKEKEIRCPFNEQCEINMVSRRFCQRCRLTKCFAVGMKKEWIMSEEARLEKKQRVEENRERRLQDAMNRALEEACMEDESENSYDEAPA	Z003_19951	Caenorhabditis_elegans	ZK662.3	zf-C4	zf-C4
28	14E12	#N/A	TGTCACGGACCTACGGCGCGCCATGTCTCCACCGGCTTTTATAGA	TAGTGCACCACAATCCTGCAGGAATCATAAAGTGGTGGAGCATCTAAA	ATGTCTCCACCGGCTTTTATAGAGCAATCCCGAATGAGTGTAGATCAGCCGTCGTCATCTTCATCTGATTCCGAATGCCGAGTTTGCGCACACACGGCACACGGTGTCCACTTTGGAGTTTTGTCTTGCAGGGCTTGTGCTGCGTTTTTCAGACGCTCTGTTGTCATGGACAAAAAATACTCGTGCAGAAAAGCAAGTCAAGGATGTCGAATTGACAAGTCAGAGAGGTATCTGTGCAGATTGTGCAGGTACAAAAAGTGCCTACAACTCGGGATGACCGCAGATAATGTTCAATGGAATCGTGATATGATTTCATCAACTGATAGAAAACGTCAAAGTGAAGAAGACGATGCAACTGACGTTGATGCATATTCAGATTGGAGTCCTGGATCCAAAAAG…	MSPPAFIEQSRMSVDQPSSSSSDSECRVCAHTAHGVHFGVLSCRACAAFFRRSVVMDKKYSCRKASQGCRIDKSERYLCRLCRYKKCLQLGMTADNVQWNRDMISSTDRKRQSEEDDATDVDAYSDWSPGSKKSCLDAPPLYDL	Z003_8237	Caenorhabditis_elegans	F44E7.8	zf-C4	zf-C4
29	13C09	#N/A	TGTCACGGACCTACGGCGCGCCATGAGTGTCTACCACACCCC	TAGTGCACCACAATCCTGCAGGTATCGACAATCTGCTCCAGCG	ATGAGTGTCTACCACACCCCGTCTCCCTCCTCTGCCACGTCATCACCGCTCTCAATCGATATACCGCAGAGGAAGTGTGTCATATGCCTCCGACCCGCGTATAGCAACAACTATGGAGTCCTTACTTGTGATGCTTGCAAGATGTTCTTCCGGCGGATAGTGATACTCAAAAAAGACTACAAATGCAAGTACGATGGACGGTGCGCCCACGTGGCAAAGTCCCCAATGGTCAAGTGCAAGGGATGCCGGTATCAACAGTGCCTGGATGCTGGAATGTCATTCCAGCCGACTTTCTTGGAATTGACGAATGAGAAGGATTTGGATATATCCGTAACTATTGGGAACTTGGTTTTCTTGGATACTCGAAAAAGTCGAATAATGAAGACACAGTTTACCGAC…	MSVYHTPSPSSATSSPLSIDIPQRKCVICLRPAYSNNYGVLTCDACKMFFRRIVILKKDYKCKYDGRCAHVAKSPMVKCKGCRYQQCLDAGMSFQPTFLELTNEKDLDISVTIGNLVFLDTRKSRIMKTQFTDDNLSLEQIVDT	Z003_2017	Caenorhabditis_elegans	C17E7.6	zf-C4	zf-C4
30	13H01	#N/A	TGTCACGGACCTACGGCGCGCCCAGGAGAATCTAGCAATGTTGGC	TAGTGCACCACAATCCTGCAGGATAATGCTCCGGTGTCATCGT	CAGGAGAATCTAGCAATGTTGGCGAATGTACCAAAATTAGATGACAATAACGCGTATTTCGACACTTTTTCACCGGAAAAATCGGGGAAAAGGGCGAAAAAACGGGCGGCCCCGTCGTCGGCTCACGAGGCCCAGCCCAACAATGGACCTTATAAATGTCGAGACTGCGAGAAAACTTTCCGGCAAAAGCATGGGCTCAATCAACACTTGCTCACTCATGAGACGAATGGAGCATTTGAGTGTGATGGGTGTGGGAAGCGATATTCGAGACAAGAAAGTGTTTATCGACATCAGAGAAGCACACCATGCACAAAATACCAGAATCTAACCACTGTGGAACACGATGACACCGGAGCATTAT	QENLAMLANVPKLDDNNAYFDTFSPEKSGKRAKKRAAPSSAHEAQPNNGPYKCRDCEKTFRQKHGLNQHLLTHETNGAFECDGCGKRYSRQESVYRHQRSTPCTKYQNLTTVEHDDTGALF	Z003_4208	Caenorhabditis_elegans	C53D5.4	zf-C2H2	zf-C2H2
31	13H05	#N/A	TGTCACGGACCTACGGCGCGCCATCTCGACTACCATAGGGCAATAT	TAGTGCACCACAATCCTGCAGGCCATTCGCGGAAGACACTTC	ATCTCGACTACCATAGGGCAATATGTCGTCGTACGAAGTTCCACCGTTCCCTGTGCTATCAACACCGTTTCTGCTGCAATACATCCCGTCGCTCATCGAGGAAGTTCAGCTTGCCACGATCCAAAATCGAACGATGGAAACCCTAGGGTTTGTCAGTGCAAAGTTTGCGGGAAGCGATTCAGCCGCCAATGGCTTCTGCAGGGACATTTGCGAACGCATAGTAAGTTGATGGGTCTCGCAACTGTTTTTCTTGGCGGTGATCTACATTTTTTCAAAAAAAAATTCAATTTTTCAGCCGGCGAAAAGCCATTCCAATGTGAGATCTGCTCGAAACGATTCGCTGACAAGAGCAACTTGAGAGCCCACATCCAAACTCACTCAGGTACTAAACCCCACAAA…	ISTTIGQYVVVRSSTVPCAINTVSAAIHPVAHRGSSACHDPKSNDGNPRVCQCKVCGKRFSRQWLLQGHLRTHSKLMGLATVFLGGDLHFFKKKFNFSAGEKPFQCEICSKRFADKSNLRAHIQTHSGTKPHKCPRCGKSFALKSYLSKHEESKCLPRMD	Z003_4356	Caenorhabditis_elegans	C55C2.1	zf-C2H2	zf-C2H2
32	14A12	#N/A	TGTCACGGACCTACGGCGCGCCATGTCTGCTTGCGATTTTCAAG	TAGTGCACCACAATCCTGCAGGCAATGATTTCCTCCAAACTAGGATCA	ATGTCTGCTTGCGATTTTCAAGCCACGTCTAACAGTGAACACAAGTATGTAAAAAATCAAGGAACATGCATGATTTGTCCCAAGAAAGCAAGTGGTCGACATTATGGAGTTTTCTCGTGTTGTGCCTGCAAGATGTTCTTCCGTCGAGTCATTGTTGAGAATTTATTTTACAAATGCAAACAAAACAAAACTTGCTATGAAAACGAAATTATCACCGGACGTCAGAAGCCTCCAAAATGCCAAGCTTGTAGATTCAAGAAATGCGTCAATCTGGGCATGATGTTGCCTCCAAAAAAAGAGCCCAAAAATTTGGATTCTTCGATCACTGCGCTGCAAACATTTCTTGCAGCCCTTAAGTTAAGAGATGATCATAGGCAAACACAATTCATGCAATATTAT…	MSACDFQATSNSEHKYVKNQGTCMICPKKASGRHYGVFSCCACKMFFRRVIVENLFYKCKQNKTCYENEIITGRQKPPKCQACRFKKCVNLGMMLPPKKEPKNLDSSITALQTFLAALKLRDDHRQTQFMQYYSVDDPSLEEIIA	Z003_5856	Caenorhabditis_elegans	F16B12.8	zf-C4	zf-C4
33	15A08	#N/A	TGTCACGGACCTACGGCGCGCCATGAGTCTATACTGTTCAAGCTTTGAT	TAGTGCACCACAATCCTGCAGGTCAAATCGAAAATCGGCCTTTCA	ATGAGTCTATACTGTTCAAGCTTTGATAATCAGTGTTACTGGATGATGGATGACAGTCAAGTAGTGTGGAACAGCTCAGCACCTCAAGAGATGATCTGCTCAATTTGCTCGGATAAAGCCGAAGGATATCATTTTGGAGCAATAAGCTGTGCTGCATGTGGTGCATTCTTCCGACGCAGTGTTTCTGATCAAAAAGTATACTCATGTTCTAATAGACAATGTAGTATTGTACACGATCCAACAAAGAGAGGTGGAAGCTGCAGATTCTGCAGATTTTTGAAGTGTGTGAGCAGTGGAATGATGCCTCAAGACGTAAAAGCCAAAAGAACTTCTTCATCACAACAAAATGTCACGTCTCTTTACCGAAATATGAATCAAAGTTCCATTCTACTAATCGAT…	MSLYCSSFDNQCYWMMDDSQVVWNSSAPQEMICSICSDKAEGYHFGAISCAACGAFFRRSVSDQKVYSCSNRQCSIVHDPTKRGGSCRFCRFLKCVSSGMMPQDVKAKRTSSSQQNVTSLYRNMNQSSILLIDQIIAFRRSIAAERPIFDLI	Z003_10433	Caenorhabditis_elegans	K01H12.3	zf-C4	zf-C4
34	15H11	#N/A	TGTCACGGACCTACGGCGCGCCGAAAACACTCCTGAAATGGTTTTTGG	TAGTGCACCACAATCCTGCAGGGATGAGAAATTACAGATGAAGCTGAC	GAAAACACTCCTGAAATGGTTTTTGGCAGTTTTCCCATTCATTCCGGGTTCTGCACCCAAGTGGTGACCCACACGGACCCAATGAACAATAACAATCAGCCAAAAACCAATGCAAATGGTCGAGCTCTCGCTGCCGACAGGAAACGACCGTACCCATGCAACCTGTGTTCTTCAAAGTTTGGTTCAAAAATGGAGCTCGAGGAGCATCAAAATTCTCACACCGGCCAGAAGCCATTTGAATGTGACACATGTAATGCAAGGTTCAATCGGAGGTCGACACTCTGGAATCACAAGAGAATTCACTCGGATGCCAAGCCGTTTGTATGTACAGTGTGCCAAATGACGTTCAAATGGAAAAATAGTTTGAAGTGTCATAAGGATATGCATCAACGAAAAAAT…	ENTPEMVFGSFPIHSGFCTQVVTHTDPMNNNNQPKTNANGRALAADRKRPYPCNLCSSKFGSKMELEEHQNSHTGQKPFECDTCNARFNRRSTLWNHKRIHSDAKPFVCTVCQMTFKWKNSLKCHKDMHQRKNETSAHLDNDLRQLTYATAAKRKLQMEQEENGGLPASSSASSVISHP	Z003_14817	Caenorhabditis_elegans	T27B1.2	zf-C2H2	zf-C2H2
35	15A09	#N/A	TGTCACGGACCTACGGCGCGCCATGAGTATCAATACAAAAAGGAAAAGC	TAGTGCACCACAATCCTGCAGGCTCCATCTACTTCCACATCTTCTTTT	ATGAGTATCAATACAAAAAGGAAAAGCATCTTTGAAACCATAGAAGACCTCATTTCCCCTGACCCGGCACCCTCATCATCTTCTTCATCTGCCAGTTGCTCATCGTTGGATAATCAGAAATTGGTGTGTCAATTCTGCAAAAAAACATATCTAACCTATTTTGGTCTTCGAAGACATCTGCAATTTCACAAAGAAGGCAAATTACAGCAGAGCTGTCCACATTGTAAAAAGGTGTATAGATCCCCAGGAGCTCTCAAAATGCATCTAAAAACACATTCTCTTCCATGCGTCTGCAATGACTGTGGGAAGTCGTTTTCAAGACCATGGCTGTTAAAGGGACATCTCAGGACGCATACAGGTGAAAAACCTTTTGGCTGTGAATTCTGTGGGCGTTGCTTT…	MSINTKRKSIFETIEDLISPDPAPSSSSSSASCSSLDNQKLVCQFCKKTYLTYFGLRRHLQFHKEGKLQQSCPHCKKVYRSPGALKMHLKTHSLPCVCNDCGKSFSRPWLLKGHLRTHTGEKPFGCEFCGRCFADRSNLRAHLQTHSGEKKHRCSRCGQSFARVQVRQRHEQCCRGGGSGGEAEKEDVEVDGD	Z003_10481	Caenorhabditis_elegans	K02D7.2	zf-C2H2	zf-C2H2
36	14A11	#N/A	TGTCACGGACCTACGGCGCGCCGCTGGTGGAGCACTTCCAT	TAGTGCACCACAATCCTGCAGGAGGGTGGTGGGGTTGCAGC	GCTGGTGGAGCACTTCCATTGGAGGATCGATCTAATATTTTACCTCATTTTTCTGTGCCATTTGCAAATCCACAGCAGTTTCTATCATTATGTGCTCAACTGGGAAATTCATCAAGTCGAAATGTATCATCAACAGCATCAACAACATCATCATGTCCAATACAGTCATGCTCTCAGAGTTTTTCATCTCCGGCAGCACTGACGTGGCATGTATTGGATGCTCATGAAGATGAGCAGGAGATATTTTCGTGTGATGTTTGTACAACAACGTTTTCAAACGGACAGGATATTAGGGAGCACAAATGCCAAAAAACATTAGCATCCCGTAGTACATCAGTACCTCCATCGACAATTCCATCTTCTGTATGCTTCTTATCAACACCTACAACTCCATGTCTT…	AGGALPLEDRSNILPHFSVPFANPQQFLSLCAQLGNSSSRNVSSTASTTSSCPIQSCSQSFSSPAALTWHVLDAHEDEQEIFSCDVCTTTFSNGQDIREHKCQKTLASRSTSVPPSTIPSSVCFLSTPTTPCLQFSINESIGTSEIREEDEEEDMDVEDGEHVANQLFGHLLQKSDDKSKMASLFNHAFPPFAAFPNMPPPFLMRQPFDPRADVFAAGRHDNDDDWEALMEISTSDEAEKIRALVGDKAVPTTDPNQCILCRRVLSCKSALQMHYRTHTGERPFKCKICQRAFTTKGNLKTHMGVHRSKHSFRGLPISLPPQLAAMHQHQHQIAPPQRIHIHNPPTSAASAAAAVAQIQASQQCPICQQRFLNAGELAVHITEHRNSLTQPPRVMPTPT…	Z003_5788	Caenorhabditis_elegans	F15C11.1	zf-C2H2	zf-C2H2
37	13G11	#N/A	TGTCACGGACCTACGGCGCGCCCCAACGAATTCACATATTCGTTGC	TAGTGCACCACAATCCTGCAGGCAGTCAAAACCTCCCGACGT	CCAACGAATTCACATATTCGTTGCTGGGCACAATTTTCGATTGCACAACAGCTTCCATGCGCAGTTCCATCTTTTCCAACTTCTCTTTTTCCATTACCCATCATGAATGATGAGCCAATGACAGATGACGAACTTGTGAAAATGAAAGGGCCATCCCGACTAATTGGTTTTCTGGTTCATCTAGCTATGAATGAAAGAGCCAGGAAAGCCTTAAGATGGACTGGAAACGGTCTAGAGTTTGTTCTTGTCAATAAAGAACTGGTTGCAAAGATGTGGGGCAACCGGAAACATAACACCAAAGATATGGATTATTATAAATTGTCAAGAGCGATTCGGGAGAAATATGAGAAAAAAGATAAGGCTGACAAGAATATTAAACCAGGAAAGCTGAAAAAGGGA…	PTNSHIRCWAQFSIAQQLPCAVPSFPTSLFPLPIMNDEPMTDDELVKMKGPSRLIGFLVHLAMNERARKALRWTGNGLEFVLVNKELVAKMWGNRKHNTKDMDYYKLSRAIREKYEKKDKADKNIKPGKLKKGTRTYSYVFTEHAYPDLMNQTEKDINFITRFAADIGQKYSDNSDLNNENYSCSPKTPENSMEQVWSRCANFELIPSPEALPSYFLLHNFGEAEDPENDLLTDQELLKLNGPNRLIAFLADLAMNEKAGRALHWTGNGLEFVIVNTKLVSKLWGNRKRNTKDMNYSKLSRAMRDKYKSATSGGQLEKRPGLHTYAFTIQAYNALKNHTGKNIEDLTMFAKNVGRKRREVLTG	Z003_4125	Caenorhabditis_elegans	C52B9.2	Ets	Ets
38	14H05	#N/A	TGTCACGGACCTACGGCGCGCCTCTGATGAAGACTCTGATGATGAATAC	TAGTGCACCACAATCCTGCAGGATCCAAATGTAGCCACGCGT	TCTGATGAAGACTCTGATGATGAATACCGAGAAGAAGATGGCAACAGTGAGAGAAGCAATTCGAAAGTATGCATTGAAGAAGTTGAAGAAGTTGAAAAAGAAGAAATTGCGAGCAGAAAACGAAAAAGAGGAAAAACGAAAGACGAGTTCCATCCATGTCCGTTCTGTGAGAAAAAGTTTCGATATCCCAACAAGCTGAGAGAACATATAAAAATTCATGATTCTAATCGTTACCAATGCCTTGAATGCTCGACAATTACCAAATTTGGCACATATGGTGAATTGAGAGCACATCACAAACTACATCATTCGAAGGCTTCTCATAAGTGTCCACAGTGCTCGTACACTAATGAGAAACCAGCATTCATTCGCCGTCACTTCGAACAAAACCATGTTGAT…	SDEDSDDEYREEDGNSERSNSKVCIEEVEEVEKEEIASRKRKRGKTKDEFHPCPFCEKKFRYPNKLREHIKIHDSNRYQCLECSTITKFGTYGELRAHHKLHHSKASHKCPQCSYTNEKPAFIRRHFEQNHVDGIPCTITGCCIKVAKNRLKAHIKEYHTSIPLSTEQTRSKLSFNKCPLCEYKPDVSDDDPEQQQKDLEDHVQRIHEEREPALCTLGCGVYLGSGSVSEHLSTCSSLIQNIPSSSQSTPALQNDEWNDANTETTLSTITGTSSQFERDSVSEVTNDLSENINDIDEEIEFGTTEPPNKIRKHSRSRVHGDFSCEICLKTFTLRDNLRKHVRVYHSENSQKVVKSTGPKHQEQYKCDRKSKDGDETTCGKTFRTEQALHDHFNVHDGIK…	Z003_9509	Caenorhabditis_elegans	F56D1.1	zf-C2H2	zf-C2H2
39	14C03	#N/A	TGTCACGGACCTACGGCGCGCCATGGAAGGCCTTCCGGAAG	TAGTGCACCACAATCCTGCAGGCATCGCTTTCGTTTTCTCCTCC	ATGGAAGGCCTTCCGGAAGAATCCGCGATTCTCGAGGTGAATGCCAATACAACTTCCCCCGATGTAAAAGTTAAATGTAAACAATGTGATCGATTTTTCACGTCTGAAAGATCCCTTCGTTGTCATATCAAAGTGCACAATGACAAATTGTTGGAGTGCTATTTCTGCGACAAAATGTTCAATCGAACGGATACTCTGTTTTTCCACGCACTCGACCACATCAGCAAAGGAACTCTACCTTGTCGTGCCGAAGGATGTGATCAACTCGTTGAGACCATGTTAGAGGGCGAGAATCATGCGAATACAGCTCATCATGTGAATGGTACAGTATCGATAAAGTGCAAGGATTGCTCCGAAGTTTCAGTATCCTTCCGTAAAATGCTATTCCATCACACATTC…	MEGLPEESAILEVNANTTSPDVKVKCKQCDRFFTSERSLRCHIKVHNDKLLECYFCDKMFNRTDTLFFHALDHISKGTLPCRAEGCDQLVETMLEGENHANTAHHVNGTVSIKCKDCSEVSVSFRKMLFHHTFKHGELKEYAEEMIIKQKDFLRMKKNQSRKERKTSVGAKEESKQFDVQDALEIEVKEEIYEADEDDGILKQLQMAMSVSSASNSEMIAKLSDVIAELFPLNDNEKYQCTHCLMSFTDAILWMTHIGYHEIDDPFKCSGCGRKFENRQAFALHLNYFAHTIGFGGENESDE	Z003_6697	Caenorhabditis_elegans	F26F4.8	zf-C2H2	zf-C2H2
40	17B01	#N/A	TGTCACGGACCTACGGCGCGCCATGTCTGTGTGCGTATCACCG	TAGTGCACCACAATCCTGCAGGCACTAGATACTGTGATTACGGATGG	ATGTCTGTGTGCGTATCACCGCTAGTACAAGCAACGATTCTGATGACAGAAGAGAGTCTGACATGTCCTCAGTGTCCGAAGTCATTTTCAAGTACAAAACTCTTGCAACAACATCAGCAAATGTTTCATACCGATAAAGCATTCATATGTGAAACATGCGGGAAAGCTTTTCGGTTTCGGTCCAACTTAGCAGAGCATCGATCAGTACATACAGCATTAAAACCTTATGTCTGTAAATTTTGTGGCAAATCCAGTAGGTTAAAAGGAAATTTAACAAAACACATATTAAAACATCACAAAAAAGAGCAGAACGAAGCAATAGCAAAAGATGATATTATTGTAAAGAAAGCACCAAAAATAGTAACCAAAGATAATGGTCCAACAACAAACGGATCAACA…	MSVCVSPLVQATILMTEESLTCPQCPKSFSSTKLLQQHQQMFHTDKAFICETCGKAFRFRSNLAEHRSVHTALKPYVCKFCGKSSRLKGNLTKHILKHHKKEQNEAIAKDDIIVKKAPKIVTKDNGPTTNGSTPTTSTATPSVITVSSA	Z003_20148	Caenorhabditis_elegans	ZK867.1	zf-C2H2	zf-C2H2
41	13B09	#N/A	TGTCACGGACCTACGGCGCGCCGCACAGCCCTGTCCCGTGC	TAGTGCACCACAATCCTGCAGGGCTTGCGAAGCCGATGCTC	GCACAGCCCTGTCCCGTGCATGTTTTCAAAACTTTGAAGGTGGAGTACCGCCAGCCCCACAACTCAAGCCATGTCAAACAAGAAGAACGTGCTGATGACAGTCATTCCAACTCACCAGCTTCCAGTAAAAGTATCAAACAGGAAAATTTGCTGAAATGCGAGCTCTGCTCCACAGTGTGCTCTTCAATCTCTCAACTTCAATCTCATACCTTAAGTGAGCATGTTCCCGAAAAAAAGCCATCAATCTCAACCTCAAACTCCGCCCCTTCGACTAAGCGTGTGGCGTGTCAACAGTGTGAGGACACTTTTGAGGACTTTGCACAATTCGCGATTCACATGAAATCTCATTTAAGTTCCGTCACTTCTCAGCTGTTTTTCTGCCCGATTTGCCCAGTTGGA…	AQPCPVHVFKTLKVEYRQPHNSSHVKQEERADDSHSNSPASSKSIKQENLLKCELCSTVCSSISQLQSHTLSEHVPEKKPSISTSNSAPSTKRVACQQCEDTFEDFAQFAIHMKSHLSSVTSQLFFCPICPVGTPFRDKKSQLEHLTTQHLQIQVTQHICSICDSAFPSPQAQSVHFAEAHKKYSCTNCDFETENEKTFKEHSKQHSRQLIMYGCALCATSYPSQLHLITHVQMSHDQETFYPPSLPIPTPPSPKSTPKQRVLQCSVCDESVLGEDGLDEHRLRKH	Z003_1457	Caenorhabditis_elegans	C09F5.3	zf-C2H2	zf-C2H2
42	13B10	#N/A	TGTCACGGACCTACGGCGCGCCATGAACCTTCCAGAATGCTCTTC	TAGTGCACCACAATCCTGCAGGGCGACGAGTTGAATAGAGCTG	ATGAACCTTCCAGAATGCTCTTCCTCGCCACCACAATCAGCTCAAAATTCCGAGGAACGTCGCGTACGTCGGCTCCGGACAGCTTTCTCTGAAAATCAGCTGGAATTGTTGGAAGAAGCTTTTCTGAAATGTCAGTATCCGGATGTTCAGCAGCGAGAGACCCTGGGGAAGCAAACAGAGCTCGCCGAGGCCCGAATTCAGGTTTGGTTCAAAAATCGCAGAGCAAAAGCCCGTAAACGACAGCGAAACGAGAGTACCGATAGCTGCAGTACTACTGAAGAATCCAATGAGGAAGGCGATGCAGATGGGTGTTTGAAGAAAAAAGCAAAGAATGAAACGACAATTATTACCTGGACACCCGGAGCAGCTCTATTCAACTCGTCGC	MNLPECSSSPPQSAQNSEERRVRRLRTAFSENQLELLEEAFLKCQYPDVQQRETLGKQTELAEARIQVWFKNRRAKARKRQRNESTDSCSTTEESNEEGDADGCLKKKAKNETTIITWTPGAALFNSSL	Z003_1463	Caenorhabditis_elegans	C09G12.1	Homeobox	Homeobox
43	14G12	#N/A	TGTCACGGACCTACGGCGCGCCATGCGGGTCATCCTTCTCC	TAGTGCACCACAATCCTGCAGGTATCATTGGTTTTCTTTTTTCGAATCA	ATGCGGGTCATCCTTCTCCTTGCCTTCCTAATATCCTTAACAGAATGTCAATGGACATCAGAAGATTTGGCTCTATATGATTTAGTGGAAGAAGTCGGAGTTAATTTCTACGAGTGGTTCGATATTCCACGAGATGCCTCGTCGAATCAAGTAAAGAAAGCATATCGAAAATTGACACTTGAATGGCATCCGGATAGGAATTCTGCGCCTGATGCTACGGAAAAGTTTCGTCAAGTTGCTGGAATCTATGAAGTTTTGAAGACTACAGAACTTCGTGAAAAATATGATAATGTTCTGGAAAATGGGTTACCTTCGTGGAGGCATCCTATGTATTACTATAGACGAATGCGAAAACTTGCATGGTATGAAGGAATCCTTGTGCTTCTTTTTATCGGAACT…	MRVILLLAFLISLTECQWTSEDLALYDLVEEVGVNFYEWFDIPRDASSNQVKKAYRKLTLEWHPDRNSAPDATEKFRQVAGIYEVLKTTELREKYDNVLENGLPSWRHPMYYYRRMRKLAWYEGILVLLFIGTIAHYLMMWAAYFEKTLVYKQNVKKSRKSKKEDPAEAEKLMKQALEEYLPKYSELLPIILARGTVTLFKNLALTAKDAMTPKEVEPEEPTEEELAQQRRQQRAAAAPQQLEFKFEVAQGMKAVSTNDPEMEKKYAAENEVVAQKQSGATWTPDELASLVRLSTEKYPAGTPNRWEQMGRVLNRSAEDVIAMAGKMKQMKQEDYTKLLMTTIQQSVPVEEKSEDDWSQAEQKAFETALQKYPKGTDERWERISEEIGSKTKKQVMVRF…	Z003_9236	Caenorhabditis_elegans	F54F2.9	Myb_DNA-binding	Myb_DNA-binding
44	13E01	#N/A	TGTCACGGACCTACGGCGCGCCCAACGGTCATCTGTCAGGTTTC	TAGTGCACCACAATCCTGCAGGGAATGACTGGAGTAGCTTGATGAG	CAACGGTCATCTGTCAGGTTTCCAACATACGATGGATTGCTCCCCGCTGGCGGAACATACATTTGCGATGAATGCAACAGCGACGAGCGGACCCCATTTCAGCTTTGTGAGCACAAGGCAATTTATCACAGTCCCCAAGACCAGAGGGTTTGGAAATGTGTGTACTGTCACACACAATTTGGAAGGCGAGGTGGACTTCGGAGGCATGTTCAGATGGTTCATATGCAGATGATGCATAAATGTCCCGTAGAGAATTGCACTCATCCAGGATACAAGTGCACAAAGGCTCTGAATGCTCATGTCAGAACTCATACTCGACCATATGCCTGCCATCGGTGTGATGCTAGCTTTGCACGAAAAAACGATCTACAGAGTCATCTATCAACTCATCAAGCTACT…	QRSSVRFPTYDGLLPAGGTYICDECNSDERTPFQLCEHKAIYHSPQDQRVWKCVYCHTQFGRRGGLRRHVQMVHMQMMHKCPVENCTHPGYKCTKALNAHVRTHTRPYACHRCDASFARKNDLQSHLSTHQATPVIH	Z003_2508	Caenorhabditis_elegans	C27A2.7	zf-C2H2	zf-C2H2
45	13G08	#N/A	TGTCACGGACCTACGGCGCGCCGAAATGTTTTATTCGGAAGGTAACTTT	TAGTGCACCACAATCCTGCAGGAGTCCGTTGAACAAAGCGTC	GAAATGTTTTATTCGGAAGGTAACTTTTATCACGATATTTATATGGAGGAGTTGGCGAATCTTGCAGAAACAAGCCATAAAAATGTCAGAGATACCTTGTCCCGTCTCCGGAAGAAAGATGAACGAGCTGGAAAGTATGTGCCCCCGCCACCCAAGCAAATGTATGAGTTCACAAGTGAACAACGGGGTGCTCTGGATCAAGCGTTTCTCGTTACACCTCAAATGGATTCAGATGGTGCAAGGGAGTTATCAGAAATTACTGGCTTAACTGTGAAGCAGATCAACAACTGGTTTTGCAATCAACGCCGTAAAGCTGATGGACGAAGTGCGGAGAAAGACAAGAAACGAAGGGAGCGGATTCGAGAAGACATGAAAAAGAACGGCTTAGGGAGAGTCGGA…	EMFYSEGNFYHDIYMEELANLAETSHKNVRDTLSRLRKKDERAGKYVPPPPKQMYEFTSEQRGALDQAFLVTPQMDSDGARELSEITGLTVKQINNWFCNQRRKADGRSAEKDKKRRERIREDMKKNGLGRVGTFRSEAVELFEKEYETMLQLEAIGGGKVRIPYTELVEKTGMERKKIRDWFSKRKGRDKRFLENMENTREVSPQNTQQNIQDILIKIVTQSGTLCSTDC	Z003_3916	Caenorhabditis_elegans	C49C3.5	Homeobox,KilA-N,Homeobox	Homeobox
46	14B05	#N/A	TGTCACGGACCTACGGCGCGCCATGCTTTCTAAATTTGTGGTAGTCGA	TAGTGCACCACAATCCTGCAGGCCAATGGTTGAGCCATTGGC	ATGCTTTCTAAATTTGTGGTAGTCGAAGTAAGCAACTCAAATAACACAATGACACTGGTGGAATACTTGGTAACGCATGGATTCGACAAGTTTGCAGTTGTAACAGATTTAGTTGATCACCCTTCTTTCAAGTACAAGGATGGTTCATCAAGTCCCGAATCTCCATCAACAACTGCTTCAACTGCTGCCCAACACACACCACCACGAACAGCAGTTTCAACACCTACATCCATCAACACTCCAGTTCCACCACATCAAAACAAACAGAGGCATTCAATTGACAAAATCGCTGCAAATTTATCCACCAAAAAGGTTTCACCATCATCTATTGAGAAGCAGCTCCAAAGAACATCTCATAATCCTCTTCATCAACTATCTACCCCACATGCATTGAGTCAA…	MLSKFVVVEVSNSNNTMTLVEYLVTHGFDKFAVVTDLVDHPSFKYKDGSSSPESPSTTASTAAQHTPPRTAVSTPTSINTPVPPHQNKQRHSIDKIAANLSTKKVSPSSIEKQLQRTSHNPLHQLSTPHALSQLQKLLEEQHKINQMNIQKKEQERQQAEIQRILLQQANAAQINHSFGLERLTPEYDDNHHSETISKASSEDLKTEPDSTDFGLGTSDDQVRASMLHLLHPVFAPAFGMLDAENIFGAASKPTTPASKRRNTDSNGAPSKKHRWLPVNELEESRSSRGKNCGRVHCKATYKCALCGKPTTLNSTGSRWNLLRHVIMIHSDCKPYKCWDCDFTGIKSNVISHARQCRHNAEDAHDITTDEMRAEWNLRLHECFPDYVRAKERGWQPEEV…	Z003_5991	Caenorhabditis_elegans	F18A1.2	zf-C2H2	zf-C2H2
47	14B12	#N/A	TGTCACGGACCTACGGCGCGCCATGTACCCGACGCCCCCTA	TAGTGCACCACAATCCTGCAGGGAATGGAGAGAGCTGCCATTG	ATGTACCCGACGCCCCCTATTGGCATAGAGGACCCGATGGGCATTCAACAGAAAGCGAACGAACCGCCTCCGCCACCGCCAATTGTGATTTGCCCGACGGAAGTAGATCACATCAATGTTACATTGGAGAAGAATCAACAATGCGAGTGCAAGGATTGCGGAAAACTATTCAATTCGGTTTGGTACCTAAAGCAGCATGCAGTGAAACATTCTAATGACAGACCATTCAAGTGTAAATTTTGTTTCAAAACTTACAAATTTCGATCAAATCTCTATCAACACAAATGTCCCGAGCGTCAGAAGTCGCAACTTCGACGACGTGGAGGCAACGTGATAAGCTCATCGAAGAGAAGCGACACTCAGATCATTAAAACCAGCAAGATTGAGACGACAATCATG…	MYPTPPIGIEDPMGIQQKANEPPPPPPIVICPTEVDHINVTLEKNQQCECKDCGKLFNSVWYLKQHAVKHSNDRPFKCKFCFKTYKFRSNLYQHKCPERQKSQLRRRGGNVISSSKRSDTQIIKTSKIETTIMQEEPQINYNMPLQNCFSETEDNDAPITYGIVIQNIDQTQMQQQMQPPQPSQAVPQHQQQLQNQDMQQVQPQQQAPSSMQNFQNFQMQLPPVVDPLMNDMENTFDKQADFDSVRGQQLPSQQIEDYVEKNKQKLFSCRKCRVFLPTEEAYMRHAASHNGEDLFPYKCSNCRQAFDNKKELMRHTQTHTMDGGIFRCFECCGQFKSQIALRRHKDQCRPCFVPPTQNNIMVSVHSPFDPFSFIPDDNLFLPVCDELARAGTDSGVGSE…	Z003_6590	Caenorhabditis_elegans	F26A10.2	zf-C2H2	zf-C2H2
48	14C07	#N/A	TGTCACGGACCTACGGCGCGCCATGGTAGATATCGCCGAAGCC	TAGTGCACCACAATCCTGCAGGTAGAAGGCGGTGGGGTATTC	ATGGTAGATATCGCCGAAGCCATGCCAACAACCGCCAGCAGTCTACCATCAGACGAGGCGCTGCGCAAATTCAAGTGCCCGGAATGCACAAAAGCGTTCAAATTCAAGCATCACCTCAAGGAGCACATCAGAATCCATTCGGGCGAGAAACCTTTCGAGTGCCAACAGTGCCACAAACGCTTCTCGCACTCCGGATCGTACTCCTCACACATGAGCTCGAAGAAATGCGTGCAACAGGCATCCCCGTCGATGGTGACCCCATTCAATCCATATCAGCTGATGATGTATAGGAATATTATGCTCCAATTGCAAACTCCCCAGGTCTCCTTTCTCCCGTCCACCGCCGCAAACAATATGGACTATATGAGCCTTCTCCAGGCAAATTTGTTCCAATCTTTA…	MVDIAEAMPTTASSLPSDEALRKFKCPECTKAFKFKHHLKEHIRIHSGEKPFECQQCHKRFSHSGSYSSHMSSKKCVQQASPSMVTPFNPYQLMMYRNIMLQLQTPQVSFLPSTAANNMDYMSLLQANLFQSLENGTSPTPTQEPSAPASPEPKIEVVDEPEVSSEVKTEVKTEVKTEDSVPEESITPAVSMSLSPAPEQNGNESMNNGGSGSDGKSSPDWRPLRSRSFLNDSQVAVLQNHFKRNPFPSKYELSAVAEQIGVNKRVVQVWFQNTRAKERRSNRLPSMPRGSVASAAAAAATSPTVWQTPVQLMAAWASQFSNGNNSLTASQDERNNENTDEVMDHDGLKDGKETPLDLTLSTDDTEPEWSPEKLIGFLDQTGGVIQELLRQAGNGFVTN…	Z003_6861	Caenorhabditis_elegans	F28F9.1	zf-C2H2,Homeobox,zf-C2H2	zf-C2H2
49	14F12	#N/A	TGTCACGGACCTACGGCGCGCCATGACAGCTTCATCTTCTGGGT	TAGTGCACCACAATCCTGCAGGCGATTCCAAGACGACGCCA	ATGACAGCTTCATCTTCTGGGTGTGGCGGTTTACCAGTTTCCCAGTGTCCCTCTTATTCCTCACTTTCAAAGCTCTTCTTTATGGATTCATCGTATGATTCATATTACTGCGAGGAGCCCGAGGAGCGACAAACTGCTTCAATTCGTGAGAGGAAGAGAATGTGTAGTATTAATGTGGCATTTATTGAGCTCCGCAATTATATTCCAACATTTCCTTATGAAAAACGGCTCTCTAAAATTGATACCTTGAACCTGGCAATTGCATATATCAATATGTTGGATGACGTTCTGAGAACACCCGAAGATTCTGGTCAGTATATTCAAAAGTGTGTTCATATGGCTCGCACAGGTCAAATCGGTGCACCAGCGTGGAGTACAAGTGATTTGCTAGCCCGGCTC…	MTASSSGCGGLPVSQCPSYSSLSKLFFMDSSYDSYYCEEPEERQTASIRERKRMCSINVAFIELRNYIPTFPYEKRLSKIDTLNLAIAYINMLDDVLRTPEDSGQYIQKCVHMARTGQIGAPAWSTSDLLARLNWIKWRRLGIE	Z003_8644	Caenorhabditis_elegans	F48D6.3	HLH	HLH
50	14G03	#N/A	TGTCACGGACCTACGGCGCGCCACTCACGGGTCGAATCAGTC	TAGTGCACCACAATCCTGCAGGTCAACTGTGGTTCCATCATCTG	ACTCACGGGTCGAATCAGTCAGTTTATCACCACAATCAACACATGGATGACTCCGAAATGATGATGGATGAGCAGGATTATTCTCAGTATCAAATGGGGTTTCCTGAAGAAGATGAGATGGTGGAAGGAATGATGACCCCTCGAGCTGTGCACCAGTGTAATGTTTGCAACAAAATATTTGTTTCCTATAAAGGTCTCCAGCAGCATGCAGTGATACACACAGATCAGAAGCCTTTCCGATGTGATATTTGTTCAAAATCATTTAGGTTTAAGTCGAACTTGTTTGAGCATCGTTCAGTCCATACCGGCTTCACTCCTCACGCCTGTCCATATTGTGGAAAAACTTGTCGACTGAAAGGCAACCTCAAGAAGCATCTTCGCACACACGTCACGACGAAG…	THGSNQSVYHHNQHMDDSEMMMDEQDYSQYQMGFPEEDEMVEGMMTPRAVHQCNVCNKIFVSYKGLQQHAVIHTDQKPFRCDICSKSFRFKSNLFEHRSVHTGFTPHACPYCGKTCRLKGNLKKHLRTHVTTKEELEAAWRPFASNRRPPADIPDDAIVLRGAGGPYYTPPPRPKKKKLGLGEPEHWVDKLRRGDLLPQVELEDKIRRLEDTIFNNMSLERWGNLFEIAKSIAFETHDCPVCKSQFMTRMDCVSHHTLEHENHREGLEFFCEKCYRPFADEASYNQHMSYHTRVSSLIETGEIVPQPADPEILVPTNDEFQMLFGANFGQQMMEPQLI	Z003_8788	Caenorhabditis_elegans	F49H12.1	zf-C2H2	zf-C2H2
51	14A07	#N/A	TGTCACGGACCTACGGCGCGCCTCATCTGCTAACAACAACAATGAAGA	TAGTGCACCACAATCCTGCAGGGGTGTCTGGCTTGGTACATG	TCATCTGCTAACAACAACAATGAAGAAGCACCTGCATCCACAGTCAGTGCTTGTAGCACTCCAACAACCACAACATCTGCTTCATTCTGTAGACCTCCAGGTCTTGGACCAGTGGCTCTTCCACCAACTCAAAATGGTCAGACGCCGATGCTTGTTTGCCCGATTTGTGGATTTATGTGCCCATCGAAATTCCACTTCAACAGTCACATGAATACTCATGGAGACCATCAGTGTAGTATGTGCGATTACACAAGCAGAACAGAAGGCAGGCTGAAAAAACACATGCGTGAGTCTCACACAGTCGAAGAGCAACTTCGAGCTGGATTTGAGTCGGAGCCAGCAAAAGAAAGTGCGTCTTCTCCAAAGAATTTATCCCTCTCTAAAGATGGAAGTGCTACA…	SSANNNNEEAPASTVSACSTPTTTTSASFCRPPGLGPVALPPTQNGQTPMLVCPICGFMCPSKFHFNSHMNTHGDHQCSMCDYTSRTEGRLKKHMRESHTVEEQLRAGFESEPAKESASSPKNLSLSKDGSATSPINEIFNLSTTMASILDSTNNAVSSTSTTEQPSALSALTLDMSSTPSLLSTLAHSSFGVSALDQIKAISENPSFMPEGGINLASALGVVSNAIKGDTPSPEKQSNGECRRSSSGKIKIFKCKQCGHQSLSKDDQWAHARTHIPAEKQLNCQHCNFVTEYKHHLEYHYRNHIGSKPFQCKKCAYNCVNKSMLNSHMKSHTNHYQFRCMDCTYATKYCHSLKLHLKKYNHRRVPEGIEMSGGDSSPPFTSDATITFSPLMKQEIKTE…	Z003_5561	Caenorhabditis_elegans	F13D11.2	zf-C2H2	zf-C2H2
52	15C11	#N/A	TGTCACGGACCTACGGCGCGCCATGGAGAAGAGTAAAAAAACGAGACA	TAGTGCACCACAATCCTGCAGGTGCTTAATAGTTTCATGTTCTCCAATC	ATGGAGAAGAGTAAAAAAACGAGACAAAATTTTAAAATAGCCGAGTTAGGGCTTCTGAAGGAGTCGTTTGAAAAAGACTCACACCCTGGAACTTCTGAAATGAATCGTCTTGCTGGTTTATTGAATCGAAACGAAGCTCAGATTAATCGCTGGTTCAAGGCAATGAGAGTAAAAGTGAAAAAGGCTTCCTTAAAGATGTCGAGAGAAGTTACAAGCCAATCGGGAAGCAATGTAGAACTCCTGGGATCTTCGATTGTTCCCGAGCCACCGAGTAGTGAAATAGTGTCATCGCAAGCTCAATACCGATTGGAGAACATGAAACTATTAAGCA	MEKSKKTRQNFKIAELGLLKESFEKDSHPGTSEMNRLAGLLNRNEAQINRWFKAMRVKVKKASLKMSREVTSQSGSNVELLGSSIVPEPPSSEIVSSQAQYRLENMKLLSN	Z003_11919	Caenorhabditis_elegans	R03E1.4	Homeobox	Homeobox
53	15E04	#N/A	TGTCACGGACCTACGGCGCGCCAATTTAATTTTGTTAAAAGATGAAGAT	TAGTGCACCACAATCCTGCAGGCTTTTGGCACCGGAACGGA	AATTTAATTTTGTTAAAAGATGAAGATCGGCCGGACAGTACTCAAAGCTGCACAAAGAGCAGCAGTGAAGACAGCAATCTAAACGGTTTCGAGGAGTATATTCGAGAACACGGCGAACTTGTACCTGGTCAAACGCCTCCCGACGGATCACACAAGTGTGGAGTTTGTCCAAAGAGTTTTTCAAGTGCAAGCGGTCTCAAACAACACTCTCATATTCATTGCTCCTTAAAGCCGTTTCGGTGTCATTTGTGTCCAAAGTCCTACACACAATTCTCAAATCTGTGCAGGCACCGGAGAGTTCATTCAGACGGTTGGACGTGCCCAACGTGTCAAAGTCAGATGCCATCACAAGCGGCACTAACGAAGCATCGACCAGTTTGCGAGATGACTGCACTCTAC…	NLILLKDEDRPDSTQSCTKSSSEDSNLNGFEEYIREHGELVPGQTPPDGSHKCGVCPKSFSSASGLKQHSHIHCSLKPFRCHLCPKSYTQFSNLCRHRRVHSDGWTCPTCQSQMPSQAALTKHRPVCEMTALYKPLMAQLAGLSGAGGLGSVPYWPHILQMATQAPHFPLAFLAANPEAYKLMQQTTCASPDAECSSGHASESSPTTTEPVDLTATPKPPSTSEMETTSKSDDGEDRDSIGDSGNDDDDDSEAGVLDESSTTTSTKKRPTSHTISDILAAPQLGAQALNSTFLGMLQRSLNYNPAVPSPHSFLRAMSGAKASSSPSSSSGSGKDRYTCKFCQKVFPRSANLTRHLRTHTGEQPYKCQYCERSFSISSNLQRHVRNIHNKPNTSLTPHNH…	Z003_12700	Caenorhabditis_elegans	R53.3	zf-C2H2	zf-C2H2
54	16A01	#N/A	TGTCACGGACCTACGGCGCGCCATGTCTCCCGCGTCATGGTA	TAGTGCACCACAATCCTGCAGGGCTGAACATCAATCACAATCTTTGAA	ATGTCTCCCGCGTCATGGTATCTCCATCGCGACTCGAAACTTTCCCCCTTTTCTCTGCTTTATTTATTTTACCAATTTCCGAAACATTCTGCACTACACAAGCCTGCTATGACGAACTCACCATTTTCCTGCAGAATATGTGGTATGAAGGCGCATGGAACCCATTTTGGAGCAGTTACCTGTAGAGCATGTGCAGCGTTTTTTAGGAGATCCAGCAAATCGAAATGGATCAATAAGAAGTGCCAGTCAAAAACTGGAAATAAGGCGAGGTGCTTCTGTAGGCCGTGTCGATTGCGTAGATGTCTGGACAATGGGATGGAAGACACAAAATTCCAATACGGTCGAGATTTAAATCTACCAGCCGACGACAATCCCCTGGTTCCCAGCATCTCAAATTTC…	MSPASWYLHRDSKLSPFSLLYLFYQFPKHSALHKPAMTNSPFSCRICGMKAHGTHFGAVTCRACAAFFRRSSKSKWINKKCQSKTGNKARCFCRPCRLRRCLDNGMEDTKFQYGRDLNLPADDNPLVPSISNFVGRPEFLLFCDSKSSGSKIVIDVQP	Z003_14820	Caenorhabditis_elegans	T27B7.2	zf-C4	zf-C4
55	16C02	#N/A	TGTCACGGACCTACGGCGCGCCATGAGTTTGACAGCTCCGCT	TAGTGCACCACAATCCTGCAGGACAGACGGGACGACGACTG	ATGAGTTTGACAGCTCCGCTAAGAGCTGGCCAGATGAACTTCTATGATGAACCTTATAATCCTGTATTAAATCTTCACATTCAACCGTCTGTAAAAGATGAGAACCAGCGGAGCACGTGGCCAATCATCGACACGTCGAATACAAGCACTCAAATCGCACGAGCTCATTTCGAAAAGCACCCACCAAACAATCTCCGTAAATCCAACTTCTTTCACTTTGTCATTGCACTGTACGACCGTAACAGCCAGCCGATTGAAGTCGAGCGGACTCAGTTTGCAGGATTTGTTGAAAAAGAGAAAGAAGTTGACGGTCAGGATACCAGAAATGGGATACACTATCGTCTGTCTCTAATGTTTCAGAATGGAATCCGCAGTGAGCATGATCTGTTTGTTCGGCTC…	MSLTAPLRAGQMNFYDEPYNPVLNLHIQPSVKDENQRSTWPIIDTSNTSTQIARAHFEKHPPNNLRKSNFFHFVIALYDRNSQPIEVERTQFAGFVEKEKEVDGQDTRNGIHYRLSLMFQNGIRSEHDLFVRLIDSSTKQAITYEGQDKNPEMCRVLLTHEVMCSRCCEKKSCGNRNETPSDPVIIDRFFLKFFLKCNQNCLKNAGNPRDMRRFQVVLCSSARIDGPLLAVSDNMFVHNNSKHGRRTKRTDASDDSEYSESAELPSSVPVIKALFPSEGWIQGGTQVVLIGENFFEGLQVAFGTASPNWGESVQLISPHAIRVTTPPKHSAGPVDVTLQYKSKTYSRGTPLRFSYITLAEPGIEYGFQRLQKLLPKYPGDPERLPKDQILKRAAELAEA…	Z003_16030	Caenorhabditis_elegans	Y16B4A.1	TIG	TIG
56	16C09	#N/A	TGTCACGGACCTACGGCGCGCCCGAAATGATCCGTTTTTTCCGAG	TAGTGCACCACAATCCTGCAGGAATCGTCGTAATTTTTTGGAGCC	CGAAATGATCCGTTTTTTCCGAGAGAACTGGAGCCGCAGCAGGACGTCGTCGAGCAGCAGCTACAATTCCAGGACGCTGATTGGACCCCGTCCCCGGCAAAGAAAAAAGGAGCTCGTGCTGGAATTCCAATTGGATCACATCCACCATGGCCAGAATATATTACTCGTGTGCTTGACGACGTTTTCATCAATTGTCAATTTATTAATGAGGAAACGAAAAAGGAATTGGCCAAGGAACTCGATTTGACCACCACGCAGGTGAAAGATTGGTTCAACAGACGTCGCCGACATGCACTTGAAGCTCATCAAAAGAACAGTGTCGAACTTCCAGAACAAATGAGAATTCTCAATGAAGCTTACGAAAGAAATCCAATTTTGGATACTGATACAAAGAATCGA…	RNDPFFPRELEPQQDVVEQQLQFQDADWTPSPAKKKGARAGIPIGSHPPWPEYITRVLDDVFINCQFINEETKKELAKELDLTTTQVKDWFNRRRRHALEAHQKNSVELPEQMRILNEAYERNPILDTDTKNRLLDVTKLSANLISNYFIKRYKKEQKEAGIPYEAGHYVRRRRVYEEEEEFENNGIGTPHYDEDGNYVGDYVEVVEEIPDWDQEVYNQAERKRRAELKEEEDKLLDEQFAKNPFTTGEELTEFAKKLNRPRPFVLKWFWKKRKRLGIEREVPPQQDGKNELLENIFEKHQFVNQKIKEKIAERTNMKPLAVQMWFKKRRDAAVYAHEHHGYELPCQMKLLDEAYNKCRIISDKDRRKLMKATKLTSNYISSYFMHRDKIASRQETEND…	Z003_16522	Caenorhabditis_elegans	Y38E10A.6	Homeobox,CENP-B_N,Homeobox	Homeobox
57	16E03	#N/A	TGTCACGGACCTACGGCGCGCCGCAATTCGGGGGGAAATTGAG	TAGTGCACCACAATCCTGCAGGTTTCTCGAGATTTGAAAATCGCG	GCAATTCGGGGGGAAATTGAGGAGGTGGAAGACGATGAATCTGAAGACGAATCCGACGAAGAAATCGATCGCCCTGACATTTATTGCATGGAATGTAGATCAAAAATCGAGGATACCAACTCGCATGACTGCAGACTAAAGCCGAAGCTTTTCGAGTGCACAGAATGCCGGGAAAGCTTCAACTTTGAGAAAAATCTGAAAATCCACAAAATTCTCGACCACCTGAAAGCTACTGACTTTGTGAGAGGAACCATTTGCCAATTCTGCTCGAAAGACAAAACTCACGCGCCTTTTAGCCGATTTTCGGCCTATATTGGACATGTAAAAGTTCATTTAAAATCCGATGATTTGGAGTGTGAGCAGTGTGGCAATGAGTTTGAAAATGAGCTCGACCTCGAC…	AIRGEIEEVEDDESEDESDEEIDRPDIYCMECRSKIEDTNSHDCRLKPKLFECTECRESFNFEKNLKIHKILDHLKATDFVRGTICQFCSKDKTHAPFSRFSAYIGHVKVHLKSDDLECEQCGNEFENELDLDHHIRREHSTDVYELVFCPKCKKVLTLEESSAHSLLHSAQNSVKIRRRKSAPFPEKPPPKKASHTGKKPVREKKNVCPYCNKAFVRPAELARHSFVHLRAKHLQSSSTEIPKWKCAICFKEYAHQAGLSEHKRTVHGNAKQIVCRICGMSFSKRIYFFSELKNFQRSNHDRHMLKIHPIEQDSRDQCQFQCPDCPTVFKKLGSLTAHKRACHLRTDTLKIPTKPLPIYKRHVCKTCKREFRDAKMLEKHRRFHLLAEHRWRDALLLH…	Z003_17369	Caenorhabditis_elegans	Y48G8AL.10	zf-C2H2	zf-C2H2
58	16B05	#N/A	TGTCACGGACCTACGGCGCGCCGGTCCACCAATGATGCCAAATAT	TAGTGCACCACAATCCTGCAGGCGCCGAGTTTTGTTTCATGCT	GGTCCACCAATGATGCCAAATATCATTCAACAGCTAAATGCCCTTCGAAATGTTCAGCTATCGAATGCAAACACAATGGCCAATCTGCAAAACATGTCATCAAGCCCCAAACATACAAACGGATCGTCGGAACGGAGTGAAAACTGCGGCGAGCTGTGTGTAGTCTGCGGGGACAAGGCGTCCGGGAGGCATTATGGAGCTGTTTCGTGTGAAGGGTGCAAAGGATTTTTTAAGCGGTCTATCAGAAAAAGGATTGGCTATGTTTGTCGGAGTCAAAAGGACTGCCCCGTCACCAAATTCCACCGTAATCGGTGCCAATATTGCCGTCTGAGGAAGTGCCTGTCAATGGGGATGAGAAGTGAATCAGTACAAGCAGAACGTCGTCCCGTAAACAACAGC…	GPPMMPNIIQQLNALRNVQLSNANTMANLQNMSSSPKHTNGSSERSENCGELCVVCGDKASGRHYGAVSCEGCKGFFKRSIRKRIGYVCRSQKDCPVTKFHRNRCQYCRLRKCLSMGMRSESVQAERRPVNNSSMLCNNDNNQQNTTPEHLSPNLLLSLVKLEHETKLGG	Z003_15678	Caenorhabditis_elegans	Y104H12A.1	zf-C4	zf-C4
59	16B06	#N/A	TGTCACGGACCTACGGCGCGCCATGGAGAAAATGAGCAGCGATC	TAGTGCACCACAATCCTGCAGGCTCCTTCGGATGGTGTTGACA	ATGGAGAAAATGAGCAGCGATCTAACTTTTGCGGAGCCGGGAGTTCGACTTTCTATTAATTTGAGGGAAAGATGCCGAATGCATGACTTAAACGAGGCACTTGACGATCTGCGAGCTGTAATTCCATATGCTCACGGGGGCTCTGTGAGGAAATTGAGCAAGATTGCCACGTTGCTTTTGGCCAAGAACCATATAATTATGCAGGCAAAAGCAATCGAAGAGCTAAGTGTTCTGGTGTCCCAGTTGAAAACCAGGAAATCTTCTGGAAATTCGGAAAATTTGGAGAAAACCGTGTCAACACCATCCGAAGGAG	MEKMSSDLTFAEPGVRLSINLRERCRMHDLNEALDDLRAVIPYAHGGSVRKLSKIATLLLAKNHIIMQAKAIEELSVLVSQLKTRKSSGNSENLEKTVSTPSEGD	Z003_15721	Caenorhabditis_elegans	Y105C5B.29	HLH	HLH
60	16C07	#N/A	TGTCACGGACCTACGGCGCGCCATGTGTTCAAAAAATTCAGAAAACTCG	TAGTGCACCACAATCCTGCAGGCAATATCATCATCATCATCATTATCTC	ATGTGTTCAAAAAATTCAGAAAACTCGAATGTTCCACGTGCCAAAAGCGATTTCATAACGCCGAATTGCTCCGAAAACACCAAATTGTTCATGATATTCCAAAGTAGAAAATCGATAATTTGTGAGGTTTGCGGCAAGAAATACAGCTCGAAATCGGCGTTAGCAAAACACAAAAGGACGCATGAGACGGATAAAAGGTGCAAAATAAAATTAATTTTTGGGAGTTCGCAAAAAAAAACTCAAAAACTGTACTTTCTGCAGAAATTATCATTTTTAGATGCCGATTTTTTTTCCATTTTGGAGCGAAATTTGTTAATATTCGGCTACTTTGCAATATTTTTTTCGCAAAAAAATACGTATATTTCCAGATTCACATGTCCAATGTGCTACGCGAGTTTC…	MCSKNSENSNVPRAKSDFITPNCSENTKLFMIFQSRKSIICEVCGKKYSSKSALAKHKRTHETDKRCKIKLIFGSSQKKTQKLYFLQKLSFLDADFFSILERNLLIFGYFAIFFSQKNTYISRFTCPMCYASFDLSDPFKIHLRKHDNLKPFGCSYCFKQFSSRSVCRRHVQLMHENQKRAGDGDNDDDDDID	Z003_16410	Caenorhabditis_elegans	Y37E11B.1	zf-C2H2	zf-C2H2
61	16D06	#N/A	TGTCACGGACCTACGGCGCGCCATGGATGACTCAACTGTATTTTGCT	TAGTGCACCACAATCCTGCAGGTTGAACTTTTTTCGCGTCTATTGG	ATGGATGACTCAACTGTATTTTGCTCATCTTTACAAACTGACCCGGTCTCAGCTTCTGAGCTTGGTGCTATAAAGTGTCAAGTGTGCTTCCTACCCGGCCATGGCATCCATTTTGGTGCATACACCTGTAGAGCATGCGCTGCATTTTTCAGGATTGTGAGCATTTCTAAGAGCAAGTGTCACTTTTCACCACGACCAACCCACAAATGTCGAAATAATAGTAATTGCAAACCGAAAATAGATGGACGCTGGTTTTGCAAAACGTGCCGGCTAACTAGATGTTTGAGCATTGGAATGTCCCCCGAGAATATTCAATATGATCGGGACAAGTTCGAATCTATACTTAAAAGTTCAAAAAATAATCGTCATCTTCAGATTCCGAACACAGTGGAATCGCAA…	MDDSTVFCSSLQTDPVSASELGAIKCQVCFLPGHGIHFGAYTCRACAAFFRIVSISKSKCHFSPRPTHKCRNNSNCKPKIDGRWFCKTCRLTRCLSIGMSPENIQYDRDKFESILKSSKNNRHLQIPNTVESQLCISPLVSFSNRREKSSK	Z003_17148	Caenorhabditis_elegans	Y46H3D.5	zf-C4	zf-C4
62	16A11	#N/A	TGTCACGGACCTACGGCGCGCCATGGTAAAACATCTGTTTATTATATTG	TAGTGCACCACAATCCTGCAGGGTGGCGATCCAGTTGGTGG	ATGGTAAAACATCTGTTTATTATATTGGCAGCGACGGCCGCCGTGGTGGCTCAACAGGTGGGGTTTGCTCCGTTGGCTCTGGGCTCTAGGCTTGGAGTTTTGGGCTGCAGCCGTATTTTGAGCAACTTCGGAGGTCAACAGCAAGAGCAAAGTGGATTCGGAAGCCAAAGCGGCTTTGGAAATAACCAGGGAAGCCAGGGAGGCTTTGGTGGAAATCAAGGTGGATTCTCAGGATCCCCACAGCAGGGAGGTTTCGGAGGACGCACCGGATCACCACCACCATTCGGAGGATTCTCAGGAGCTCCACAAGGATTCGGAGGCAATCAGGGAGGATTCGGTGGACAGACTGGATTCTCCGGAGCCCCACAAGGATTCGGTAACAACCAACAAGGCGGATTC…	MVKHLFIILAATAAVVAQQSNFGGQQQEQSGFGSQSGFGNNQGSQGGFGGNQGGFSGSPQQGGFGGRTGSPPPFGGFSGAPQGFGGNQGGFGGQTGFSGAPQGFGNNQQGGFGGNQGNQGGFGGRTGSPPPFGGFSGAPQGFGGNQGGFGGQTGFSEAPQGFGNNQQGGFGGNQGNQGGFGGQNGQNGQNTGNNGGFGGNQGVTASGFGGQQQGFGQQQQTQNGFRGKRQAPPAGSPPPPPPPKGSPPLAGSGSPPPPPAAGSPPPPRTGSPPPPPTGSPPPPPAGGSPPPPRAGSPPPPPPPRGSPPTGSLPPPQAGGSPPPAGTGSPPPPPRQKRQAPERSPPTGSPPTGSPPTGRPPRGGPGKSSEESSESREGPRGGPRGGPRGGPRKSSEESSE…	Z003_15200	Caenorhabditis_elegans	W03D2.1	AT_hook	AT_hook
63	15B07	#N/A	TGTCACGGACCTACGGCGCGCCATGAATTGCTTGGTATGCTCAGC	TAGTGCACCACAATCCTGCAGGTATCCTTCAAGCTCGGATCCTC	ATGAATTGCTTGGTATGCTCAGCACGTGCATTCAATAGAAACTATGGAGTAATGTCGTGTTTTGCCTGCAAAATGTTCTTCCGTAGAACTGTTTTCAAAAATATGTTATTCAATTGCAAATACTTTAAAAATTGCACTATCCACTACAAAACTCACCCGAAGTGCCGTGCTTGTCGATTCCAAAAATGCTTGAACATTGGCATGAAAGCAGCTTCCAAGAATGATAGAATAGTTAGTATTGGCAACTACGAAGATTACAATTTTGACAAATTATTGAATGATTTGATTGTGAAAAATGATAAAAACTATTCAAATTTTATTGATTTCTATTCGTTGGAGGATCCGAGCTTGAAGGATA	MNCLVCSARAFNRNYGVMSCFACKMFFRRTVFKNMLFNCKYFKNCTIHYKTHPKCRACRFQKCLNIGMKAASKNDRIVSIGNYEDYNFDKLLNDLIVKNDKNYSNFIDFYSLEDPSLKDI	Z003_10802	Caenorhabditis_elegans	K06B4.6	zf-C4	zf-C4
64	15C08	#N/A	TGTCACGGACCTACGGCGCGCCATGCTCAAACCACCCATTATCAC	TAGTGCACCACAATCCTGCAGGCAAGAAGAGCACCAGTTTCCG	ATGCTCAAACCACCCATTATCACCAGCAACGACAATAACAACACAAAAGTGGCTGAAAACTTGAATGATTTGAATAATAAGGGGAAAATGTCTGGTCAACAGATTGAATCCTTCTCACCTTGGCACGCTCAAACGTCGTCGTCAGCCGTTACAGGAACATCAGAACTGTTTGGATCCACGTATGCGATGTTGAGTGATCATTCTGTCTATCCAGAACAATGGTCTGGAAAGCAATTATCTCAATCAGTTCTTTTCGAGCAACCCCAAATTCAACCATTGGTTGGTAATTCCTATGATCCTCCAGTACGATTTGATCCACCATATGCTTACCGTGCCACTGCGACAGGTTACATGCCAACAGTACCAGGGCTTTCTACAAATTCAAGTCCATATTATCCA…	MSGQQIESFSPWHAQTSSSAVTGTSELFGSTYAMLSDHSVYPEQWSGKQLSQSVLFEQPQIQPLVGNSYDPPVRFDPPYAYRATATGYMPTVPGLSTNSSPYYPRTSGYAAGQQFYAPSLSGVPNTQQLILAAQVAQASNVQQQLQQQVLRPEPLRPATQKSTNGVHRSTSNSSAETLRNNSVSAATVSPSDDNSLNSPALTSSGSAGSGTPPLGIDLNNTDLESGDEERVMCMACRGVYPSRRSLTGHIGRNEKCREIIGRNYLDALAQGVNPPIPGTDAAIKSGAITTGADGMSPVCPFCDRFISHYKGNIRRHINQCRKSAEPMKRHRVEAHEKQSPKKKVKKEQNEMYQHEYNDHDSSSMSGGMMNSPKISPPSSSFYGANSSDLCSPGEYSNSA…	Z003_11657	Caenorhabditis_elegans	M04G12.4	zf-C2H2	zf-C2H2
65	16E09	#N/A	TGTCACGGACCTACGGCGCGCCCCACCGAATCGACCACCAC	TAGTGCACCACAATCCTGCAGGTTTGTGTCCACATATCGCGATTT	CCACCGAATCGACCACCACGGCAGAATCATCAAAATGGGGCAATTGGTGGCAAAAAGTCATCGGTTACTATACAAGAAGTTCCGAATAATGCGTATTTGGAGACCTTGAACAAATCCGGAAACAACAAAGTTGACGACGACAAGCTTCCAGTATTTCTGATAAAATTGTGGAATATCGTAGAAGATCCAAATCTTCAATCAATTGTTCATTGGGATGATTCTGGTGCAAGCTTTCATATTTCTGATCCATATTTATTTGGGAGAAATGTTTTGCCGCATTTTTTCAAGCATAACAATATGAATAGCATGGTCAGACAGTTGAATATGTACGGCTTCCGAAAGATGACTCCACTGTCCCAAGGTGGTCTAACTCGAACAGAATCAGATCAGGATCATTTA…	PPNRPPRQNHQNGAIGGKKSSVTIQEVPNNAYLETLNKSGNNKVDDDKLPVFLIKLWNIVEDPNLQSIVHWDDSGASFHISDPYLFGRNVLPHFFKHNNMNSMVRQLNMYGFRKMTPLSQGGLTRTESDQDHLEFSHPCFVQGRPELLSQIKRKQSARTVEDKQVNEQTQQNLEVVMAEMRAMREKAKNMEDKMNKLTKENRDMWTQM	Z003_17629	Caenorhabditis_elegans	Y53C10A.12	HSF_DNA-bind	HSF_DNA-bind
66	16H08	#N/A	TGTCACGGACCTACGGCGCGCCATGAACCGACTACTGGGATGTC	TAGTGCACCACAATCCTGCAGGCTGGCAAATCCGTGTATCCAAT	ATGAACCGACTACTGGGATGTCTAGATTGCGTTCAAACTGAGGCCTACAACACACTGGAAGATCTCGAAGCACACATTGCTAGTGATCATCTTAACATATGCCCATATGAATGCGAAAAATGTAAGTACGCTAAGTTTCCAACGGAATTCGCCCTTGTCAGTCACTGTATGAATGATCATGGACTCACCGAATTTTCTATAAAATATCGCTACACACCGGAGTTGAGTATGAAAAAGAAGGAACTGACCCAAAAGCTCGAACGGTGCATTGCAATGAGTCGATCTATGCGGATTGAAGGGAAAATCAGCGATGCGGTGTCAAGCACAGTGGAGAACAGAGTCAAAGTCGAAAACTCAGAAGCAACTGGCACACCTATTCAGTCATCTTCTCCTGTTGTC…	MNRLLGCLDCVQTEAYNTLEDLEAHIASDHLNICPYECEKCKYAKFPTEFALVSHCMNDHGLTEFSIKYRYTPELSMKKKELTQKLERCIAMSRSMRIEGKISDAVSSTVENRVKVENSEATGTPIQSSSPVVFVDNAYHAFLDETLARHEEERGAGPSFEGASDGGGPIKPKQQIQCSLCGDVVSKQRSSMVYHANTRHGKYELYECGICHRKWQTIAKSDVIKHIKSHHERPDGTIDCDMVIDYRKNLGNKLKEITEKCFPERKKKRIGYTDLPE	Z003_19686	Caenorhabditis_elegans	ZK287.6	zf-C2H2	zf-C2H2
67	17A07	#N/A	TGTCACGGACCTACGGCGCGCCATGGAAAAATGCGATATTTGTCACC	TAGTGCACCACAATCCTGCAGGAGTTATGATTGGCGTAAACGAGATG	ATGGAAAAATGCGATATTTGTCACCAGAAGTTTTCCAATAAGACAAACTTGAATCGTCATAAGGTGATGCACAGTGGAAAAAAGAAGTTTGAATGTCAGTTCTGCAGAAGACCTTTTTTTCGGAATGATCGGATGAAAGAGCACATGATGACCCATATCAAGAAAGGAAATACCTTTGAATGTCCCATCACAGCGTGCAATTCAAAGTTCAACAGCTTCACGAGTTTGCAGTTTCATGTAGATTCGGAGCATATCATAAGAGGATCGTCTCCAGCTAAATGTAAATCTTGCATCAAATGGTTCAACAGTTCCCATCGTCTTCTGCTTCATTTTCATACTGCACACCTGGATCATACGAAATTCTTCTCTTTCAAACCTGCTCCAATTCTTCCAAAATCC…	MEKCDICHQKFSNKTNLNRHKVMHSGKKKFECQFCRRPFFRNDRMKEHMMTHIKKGNTFECPITACNSKFNSFTSLQFHVDSEHIIRGSSPAKCKSCIKWFNSSHRLLLHFHTAHLDHTKFFSFKPAPILPKSTTSILNPIKNPDDFDRIFDFFKTEIAPLFPLHSTVSQAPLPQCSRSVKSAKELSPTPSTEIETPEEEELDGPESWYCDYCKIRFDDKVMWYLHSGLHSDDIPFKCSLCGSLCDGKYDFAAHLVYANHNF	Z003_19880	Caenorhabditis_elegans	ZK616.10	zf-C2H2	zf-C2H2
68	16F03	#N/A	TGTCACGGACCTACGGCGCGCCCTTAGTTTTATACCTTCTGGAACGGTA	TAGTGCACCACAATCCTGCAGGGTGTCGCCGCGACGGATAC	CTTAGTTTTATACCTTCTGGAACGGTAGTCGGAGCTCCAGCGAATCAGGACGACGGCTCGAAACCAAAAATGGAGTGTCCAACGTGCGGTCTTGTGCTCTATAGGCACAATTTTGCGGCTCATTTCCGAATTCACACTGGCGAACAGCCGTATGGATGTGACTATTGTGGAAAGCGTTTTCGAACGACATCATCGTTAAAAGTGCACAAAAGAGCACATACTGGAGAGAAGCCGTATGTGTGTCCGAGTTGTGATTATCGAACGATAACGAAGAGGAATCTGGATCGACACATTGTTAATCATCATATTAGAAATGCGGTTATAAAAGGACCAATTATGAGAAGATCTAGAACAATTCCTCGATATCACCCCGAAGACCAAGTCGAATCGATACCGACA…	LSFIPSGTVVGAPANQDDGSKPKMECPTCGLVLYRHNFAAHFRIHTGEQPYGCDYCGKRFRTTSSLKVHKRAHTGEKPYVCPSCDYRTITKRNLDRHIVNHHIRNAVIKGPIMRRSRTIPRYHPEDQVESIPTTMKYTVNEKSVRVSVAATR	Z003_17961	Caenorhabditis_elegans	Y56A3A.28	zf-C2H2	zf-C2H2
69	16F11	#N/A	TGTCACGGACCTACGGCGCGCCCAAAAAATGAGTTACGGGCAGAAC	TAGTGCACCACAATCCTGCAGGGGGATGAGGTGCCGGGGTA	CAAAAAATGAGTTACGGGCAGAACTTCCAAGCTCCATGGGATATGCAGCAGCAGATTCAGATGTTTCAGCAATATCACCAAAATTTCCAAGGAGGATATTCGGACCCATTCACCTACCAGAATCAGTATGCACATCAGCCAAAAATTGTGACGGTCACTTTGCAGGACCCACAGGACCTCTGGAAGGAGCTTCATTATTTGAGTAATGAGCAGAATGTGCTTAATAATGGGAGAAAAATCTTCCCAGCCCTCAACTACAAAGTCGAGCATCTCAATCCAGAATCCAACTACAAAGTGGAAATTTTGCTCCGCCGAATGGTCCCCTATCAGATTCAATATTCAAATGGAAGCTGGTCCCGGAAGAATGTACAGAGCAAGAAGACTATTGCAATGAAAACA…	QKMSYGQNFQAPWDMQQQIQMFQQYHQNFQGGYSDPFTYQNQYAHQPKIVTVTLQDPQDLWKELHYLSNEQNVLNNGRKIFPALNYKVEHLNPESNYKVEILLRRMVPYQIQYSNGSWSRKNVQSKKTIAMKTEKVFVGEFTGQDIMRTGLDLSDVKVFNIGSDNKKKVTPYEEMSDAEKREYDTQYSKKKTSMLEVSNECKYIPVLIINEILPNQELRLVGEFENEITQFATVSSYKNHIVKALRTAANPTSRGDAKQEAVQVGKQWRSSNKSLLESLRPSMICTSVSTTAPSTNFHAPLQYPGTSSP	Z003_18305	Caenorhabditis_elegans	Y66A7A.8	T-box	T-box
70	16G02	#N/A	TGTCACGGACCTACGGCGCGCCATGGCAAATTGCTTGATGCAAC	TAGTGCACCACAATCCTGCAGGATTGAGGTGTTTGTGGTGGAG	ATGGCAAATTGCTTGATGCAACTCAATCAGTGTGGCTTTCCGAATTGTGCACAATACTTTGCCAGTCAATATGATCTCACTGCACATATTGAATATACACATATTCCTGTAATTGAAGAAGATGTGAAGCGGAAAACCCTATTGGCAGCAAGCGTTGCGAACGGAGAACAGCCGGTTCAACCTGCACCAATGAATCTACCGCTTAGTTATTATAGTCGAGTATTTCGAACAGCGTACCGCCCGAATCCTATCAAACCAGAGCCGCTGAAAGTTTCATTTAATCACTACAAACGACGATCTCAACGAGATCGACAAATTCATCCGAATCATATGGCTTCAAGGATTCTACGAGATATGATGGCACGGCAGGGAAGGCATATTACAATTGAAGAAGCTGAG…	MANCLMQLNQCGFPNCAQYFASQYDLTAHIEYTHIPVIEEDVKRKTLLAASVANGEQPVQPAPMNLPLSYYSRVFRTAYRPNPIKPEPLKVSFNHYKRRSQRDRQIHPNHMASRILRDMMARQGRHITIEEAEKRLMDVDFEECGPENNEVRFRCAIVDCNKRYKSMFALRVHMKIVHNVVVSEDAKSLTNYPSEDVKPNISALQQAMQHQQIQQQHHHHQQIPTSAPEPSVSSGTPTTGTPAPNTPLAQGSPLPGAAPTFGNPATNTTSYKCTYCSKRYKTSSGLSNHMMSSHQKISDVQDAPTPQVVEQLISQVRMQRQQQEQNSMEQGQQRITAPPQTPQS	Z003_18376	Caenorhabditis_elegans	Y67H2A.10	zf-C2H2	zf-C2H2
71	13C01	#N/A	TGTCACGGACCTACGGCGCGCCCCGACCGAATCTCCAAACGT	TAGTGCACCACAATCCTGCAGGCACAAAGCAACTTGAAAAACAATTGAC	CCGACCGAATCTCCAAACGTGATTTCATCTGTTCAAGCATCGACAATTGCTGACATAATCGGACATTATGTGAATGGAAACTCTATCAAAGATGTTGTGAATTCTTCACAAAAATCGGCTTCACAGCCCCGCACTGCACGCGAACCACGCATAAAAAGACCAATGAATGCTTTTATGGTAATAAACGTTCAAACATGGAAAATAAGGAAATCAAATGATTATATTAAGGTGTGGTCGCAACAACGTCGCCAACAAATTGCAGCAACAGGACAGAAATTTCACAACTCTGACATTTCAAAGATGCTTGGAGCTGAGTGGCGAAAAATGGAGGAGCACGAGAAAGTTCCTTTTGTTGAGCGCGCAAAGCAACTCCGCGAAGAGCATTTCAATGCCCATCCA…	PTESPNVISSVQASTIADIIGHYVNGNSIKDVVNSSQKSASQPRTAREPRIKRPMNAFMVINVQTWKIRKSNDYIKVWSQQRRQQIAATGQKFHNSDISKMLGAEWRKMEEHEKVPFVERAKQLREEHFNAHPDYVYRPRRRKRVEKSAGSVDSNSADEITKPVNVYNSSTYTNVFSQLFFKLLCD	Z003_1617	Caenorhabditis_elegans	C12D12.5	Sox	HMG_box
72	14C05	#N/A	TGTCACGGACCTACGGCGCGCCATGAACTCAATGTTTTGTTCAGAGTTG	TAGTGCACCACAATCCTGCAGGCATCAGAATCGCCTCCTCCA	ATGAACTCAATGTTTTGTTCAGAGTTGCAACAAGCGCTGCCGCAGATGTCGGAAGACGTAGCAGTCACGGCGCAAACAATTCTCAATGGAACCCCGCCCCATAATCATTTTCGAAAAGAGTGGCTCGCTGGAGCAGCAGGAACGACAACGCCCACGACGACCTCTGGCGGACAAATGATGACGCTCTCCCCTCCCGCCGGTGACGGACCAGGTTCCGCTGGCTCAATGGCTCCCGAATCGACTTCTTCCCTTTCCGACTTGTCTGGTGACGCGGAAGGTGTGTGGAGTATAGACATTGATCAAGCATTTCAAGAAGCGTTAGCCATCTATCCACCTTGTGGACGAAGGAAAATTATCATCAGTGACGAAGGGAAAATGTATGGAAGGAACGAACTAATC…	MNSMFCSELQQALPQMSEDVAVTAQTILNGTPPHNHFRKEWLAGAAGTTTPTTTSGGQMMTLSPPAGDGPGSAGSMAPESTSSLSDLSGDAEGVWSIDIDQAFQEALAIYPPCGRRKIIISDEGKMYGRNELIARYIKLRCGKTRTRKQVSSHIQVLARKKLRDEQAKKKGDIPSLLQQASPPGGVKSPSAVVFPPVSAAVAAITEISPQSSYSSIVPKVETDQISQQLFKSLPLWSFQQTPGLLSEWIYHNLFSNNPLPTKQFHLFSAYVKCNKTSLRTELVKIENTLEKDDIDISVFYEKYPKLLRELFEKSEKKDVFFLAKCWANINVSDDVQNCQYAVDSFYSSREKFQLKVSTMACSFGNQAVEKIEQYFPIEFDGSYSFILNNSPMCDYMVKF…	Z003_6791	Caenorhabditis_elegans	F28B12.2	TEA	TEA
73	15C05	#N/A	TGTCACGGACCTACGGCGCGCCATGGCCGCCTCCATTTCCA	TAGTGCACCACAATCCTGCAGGATTGCATCAAAGTGGTTCTCATGT	ATGGCCGCCTCCATTTCCAGAAAGTCCTCTTTAAGCCAAATCGCGTCACATTCTGGCGGCAGTGACACTTGTAAAGTATGTGGAGATGGAAACGCAAAAACCCATTACGGAGTCGTCACATGCTTCGGATGTAAGGGATTCTTCCGGAGAACGCTGAAAAGACCCTCCGAGTACACGTGTAGGCATAATGGACACTGTGTTGTGGATAGGCATGAGAGGAATTCTTGCAGATTTTTTTCGAATTTTTTATTCCTAAAAAATTTTTTAATTCCCAAAACTTCCAGATTCTGCCGTTTCAAAAAGTGCATCGAAGTGGGTATGGATCCAAAAGCTGTCCGTCCTGATCGAGATGCCACCGGCCGACATTATCAGGGCCGTCAGAGACGATCAAAACTTTCA…	MAASISRKSSLSQIASHSGGSDTCKVCGDGNAKTHYGVVTCFGCKGFFRRTLKRPSEYTCRHNGHCVVDRHERNSCRFFSNFLFLKNFLIPKTSRFCRFKKCIEVGMDPKAVRPDRDATGRHYQGRQRRSKLSAEDEGEVDAEWMRKLPVDMRTTLMQL	Z003_11439	Caenorhabditis_elegans	K12H6.1	zf-C4	zf-C4
74	15C12	#N/A	TGTCACGGACCTACGGCGCGCCTCTTTGCCAATTAAAAAGATCTGTCC	TAGTGCACCACAATCCTGCAGGGGGTGATGTGGGAAACTCCA	TCTTTGCCAATTAAAAAGATCTGTCCAGGATTCCCAAAGAAAGCCACAGAAGTCGGGGGCCGCGCCGAAGGTGCGGTCCACGGCTGGTTCAGCTATAAATCATATCATCTAATTTATACTAAATTGATAATGATAATGGGAAGTATTCCATCCAACAAAAGGATCATGTCTGAAAGCCAAGTGAGACGAGAGTTGAACGCTAGTTTTGCAAGAAACTGCCACCCAACAGCGATTGGAATGCAGAAACTATCCGAACGGTGTGGAATACGATACAAGACAATTTTTGACAATTTTGAGACAATTAGAAAAGACGGAAAAATTGAATGTGAGACAAATGACGCGTGTTGTCGAATTCGGGAGTTTTTGTCTCGTGAAACGGATACTACTTCCTACATAGAA…	SLPIKKICPGFPKKATEVGGRAEGAVHGWFSYKSYHLIYTKLIMIMGSIPSNKRIMSESQVRRELNASFARNCHPTAIGMQKLSERCGIRYKTIFDNFETIRKDGKIECETNDACCRIREFLSRETDTTSYIEITNEVQTVLEDEIELHLLSRKRFTLGYVHVIMEKTDLAPSYIRAQYENWRRKLSTKDRGSWKIGDSEAENSVLSAEVSKQLEEAFLQRTNNREDKTLRPKDIKALSTQLEINEKEIENWIAKKTEATSGSNSTEQQQKHNILRIFASCRRRLPKLNIEGLNKYFAKNNKPGVRQREKIAKKLGLSERQVRNYFNKKRITERKLKVWKDAPKDFLTLSKQTVDEMMKIAEERRKPNDEYIQIANRLGVSHITL	Z003_11952	Caenorhabditis_elegans	R04A9.5	Homeobox	Homeobox
75	16A07	#N/A	TGTCACGGACCTACGGCGCGCCATGTCTCCACATCCCTGTTTTG	TAGTGCACCACAATCCTGCAGGTGAAATGTACGCTGAGTCTATGGA	ATGTCTCCACATCCCTGTTTTGTCTGCAATTCGCCTGCCAATGAGTGTCACTTTGGCTCTAGATCTCAAATCTGCAGAGCATGCTCCGCCTTCTTCCGTCGTTACGTACTCTCTCCAAAATCTGCTATAAAATGCCGGAAAGATAAATCGTGTCGCATTCACTACAAAGACCCAAAAATCTGTCGATTCTGTCGTATGGAACGATGCGTGCTGGCTGGCATGAAGACCACTGCTGTCCAACCGCCAAGAGAAAAATATAGTGAAGATAGAGGTGACTCGGAAACCAGTTCATGCTACAGTTCAAGTCCGTATACACACGAAGTTCAAAGTTGCTCTCGTGACATTCCGCGACTCCATAGACTCAGCGTACATTTCA	MSPHPCFVCNSPANECHFGSRSQICRACSAFFRRYVLSPKSAIKCRKDKSCRIHYKDPKICRFCRMERCVLAGMKTTAVQPPREKYSEDRGDSETSSCYSSSPYTHEVQSCSRDIPRLHRLSVHFK	Z003_15001	Caenorhabditis_elegans	VC5.5	zf-C4	zf-C4
76	16B09	#N/A	TGTCACGGACCTACGGCGCGCCCGCAGGCTAAACGATTCTGG	TAGTGCACCACAATCCTGCAGGAAATATCGTCCATTTCCGGTAATTCT	CGCAGGCTAAACGATTCTGGAGATGAGAAGCTTGAGCAGAAGGCGAAGGAACTTCAATCGCTTATCCGAATGAGCCAATCACAATGGAAAGTCGAGCAAAAGCAACAGCTGGAAGATTCTCTGTTGAAGCCACACACTGCTGGATCGATTTTCACTTGCGTTATGTGCTCGAAAGCATTCCCGAACGCTGAAGCTCTCCAGATTCACACTGATCAAGTGCATGATTTGTCTAGATTAAAGCATCGTTGTAAGCTGTGCGGAAAAGCTTATAAGCGCAAGAAGAACCTTGATGCTCATATGGCCCTCCATCTCAAGGAAATCCAATGCGACAACTGCTCACTGGTCTTTCAATCTGAAAAATCGTTGCAAAGTCACATAATCCGGCATCATCAAGAGGAT…	RRLNDSGDEKLEQKAKELQSLIRMSQSQWKVEQKQQLEDSLLKPHTAGSIFTCVMCSKAFPNAEALQIHTDQVHDLSRLKHRCKLCGKAYKRKKNLDAHMALHLKEIQCDNCSLVFQSEKSLQSHIIRHHQEDADELEVWKAPCSICKELFPSTSVKTHEWYCKNREKIIEKQRVSKILKVQSLPSSPALSTVSYASFSSCQPGPITSPVSYRDKSCQVCGESFASRQSMLRHVGRKHPDAKNDPNVTAVRYISAESPKHPYACIECGKRFTTVTALSTHKARVHSQSNRFECTICHKSYPVPSELRKHIKRVHEKDAPKSRSALEELPEMDDIF	Z003_15852	Caenorhabditis_elegans	Y111B2A.10	zf-C2H2	zf-C2H2
77	16B12	#N/A	TGTCACGGACCTACGGCGCGCCATGTATTCGCCAGAATCAATGAACT	TAGTGCACCACAATCCTGCAGGCATCCACATACATCAGTCGCC	ATGTATTCGCCAGAATCAATGAACTCCAACATATCTTCTCCATCCCCTCCGTCGTCGTCTTCTCTTAATGCTCCAAGTCTTGCGGATGCTCCTGAAGTTAGATCCGATGATGGAGAAGCCGAAACTTCCGAACCATCGACTTCTGTCACAGCTGTACCAATGGAGATTGTGTCCCAAGCATCTACATCTGCTCCTGTTAACCAGTTGCTCGCGAGCGGAATTGATATGTCTAGCGTTATTAAAAACAACGCTGTTTTACAGGCACTTCTTGCCAGTGCCAGTGCCGGTGGATTCGGAGACAACGCAGGCCTCACCATGTCAAAATTATTGACCGCCGCTCTCGCCAATGGATCCACTGCGGTTGCTAAAAGAGATGCAGGTTCTCCACGTACTGATATC…	MYSPESMNSNISSPSPPSSSSLNAPSLADAPEVRSDDGEAETSEPSTSVTAVPMEIVSQASTSAPVNQLLASGIDMSSVIKNNAVLQALLASASAGGFGDNAGLTMSKLLTAALANGSTAVAKRDAGSPRTDIPKKTRLKVFSNGFFMTFDKLSSCQKKYFWRCEYKNTCKARMHTDIVTEKILTFIHEHNHSAPIDEEVRLYGLDPTNIERNRVYIVGNVADPNQRRKIRKQVADREAAAKRLVQQQEEEQQKQQSASSIVAARAAYAQAMQNGSIPTSSGVASFLQSTSATAPMTSHSMLLAQMPFLNNIKTEMSNMVKNEQFTPERYTQHMSPNLTATIAPLIIPTENYDSPSYRQPAIKRKATDLTNEEHDLRRDPMFQPTFELARKLRKLWKGE…	Z003_16007	Caenorhabditis_elegans	Y11D7A.12	FLYWCH	FLYWCH
78	16E04	#N/A	TGTCACGGACCTACGGCGCGCCGAACGACTAAAAAAGTGGCCGG	TAGTGCACCACAATCCTGCAGGAATAGCGTCTAGTTTTTCCGGTG	GAACGACTAAAAAAGTGGCCGGAAATGTATCAAGTGCCGCGAAAATGCCGAAAAAGTCAGGATTTTGCGGAAATTCGGCCGGCGGTCGGATCTGTGAGAATCGAGTTCTCGAAAAAGCCGGAAATTGTGGCAAAACCAAGAATTGTGGTTCCGTGTCCAAACTGCGATTTTGTCTTTGGCTCCGGTCGTGCTCTGGCTCAGCATCAGGCCAAACACTCTAAAACTGTTAAATCTGAAATTTCAACCCGCCAACCGGGTTTTCTGTGCCCAATCACCGATTGCACCGCCCGTTGCGATTACCAGGCCACGTTGAATGAGCACGTGCGTGCTCAGCACGAAAATGAACAAGTTGCGTATGAAACTATGCAATTTGCGAATTTCAACGAGTTTGAGCGTTGG…	ERLKKWPEMYQVPRKCRKSQDFAEIRPAVGSVRIEFSKKPEIVAKPRIVVPCPNCDFVFGSGRALAQHQAKHSKTVKSEISTRQPGFLCPITDCTARCDYQATLNEHVRAQHENEQVAYETMQFANFNEFERWKENLEYSTSSRFVHTSGRYTTTGKTRRYS	Z003_17384	Caenorhabditis_elegans	Y48G9A.11	zf-C2H2	zf-C2H2

## Sheet: gene_synthesis
BBID	pTH	Gene	Codon_optimized_RE_site	Sequence AA	Domain
UT245-48	pTH10622	F49E10.5	ggcgcgccATGCCGACTACTTGTGGTTTTCCGAACTGCAAATTCCGTTCTCGTTACCGCGGTCTGGAGGACAACCGCCACTTCTATCGCATCCCGAAACGCCCGCTGATCCTGCGCCAGCGTTGGCTGACTGCGATCGGTCGCACCGAAGAAACCGTTGTATCCCAGCTGCGTATCTGCAGCGCCCACTTCGAAGGTGGCGAAAAGAAAGAAGGCGATATCCCGGTCCCGGACCCGACCGTTGATAAACAGATTAAAATTGAACTGCCTCCGAAAGAAAGCAAAAACTCTGATCGTCGTCGTAAGCAGAACATTCCGGCTCGTTTCCCGCGTCCGGAGTCCCCGTCTGGCGATAGCCCAAGCTACTCCAAAAAATCTCGTAGCTTCCGTGATTTTTACC…	MPTTCGFPNCKFRSRYRGLEDNRHFYRIPKRPLILRQRWLTAIGRTEETVVSQLRICSAHFEGGEKKEGDIPVPDPTVDKQIKIELPPKESKNSDRRRKQNIPARFPRPESPSGDSPSYSKKSRSFRDFYPSLSSTPSFDPAQSPHTPHPPVLPDPQQALND	THAP
UT245-49	pTH10623	C55C2.1	ggcgcgccATCTCTACCACGATTGGCCAGTATGTAGTTGTTCGCAGCTCTACCGTTCCTTGTGCAATTAACACCGTTTCCGCGGCTATCCATCCGGTGGCACACCGCGGTTCCTCCGCGTGCCACGATCCGAAAAGCAATGATGGTAACCCGCGTGTCTGCCAATGCAAAGTGTGCGGCAAACGCTTCTCTCGTCAGTGGCTGCTGCAGGGTCATCTGCGTACCCACAGCAAGCTGATGGGTCTGGCCACTGTATTTCTGGGCGGCGACCTGCATTTCTTCAAGAAGAAATTCAACTTTTCCGCGGGTGAAAAACCGTTCCAGTGTGAGATCTGTTCCAAACGTTTCGCCGACAAATCTAACCTGCGTGCTCACATCCAGACTCACTCTGGTACTAAAC…	ISTTIGQYVVVRSSTVPCAINTVSAAIHPVAHRGSSACHDPKSNDGNPRVCQCKVCGKRFSRQWLLQGHLRTHSKLMGLATVFLGGDLHFFKKKFNFSAGEKPFQCEICSKRFADKSNLRAHIQTHSGTKPHKCPRCGKSFALKSYLSKHEESKCLPRMD	zf-C2H2
UT245-50	pTH10624	Y61A9LA.9	ggcgcgccATGAGCGAACCGCCACCGCCACATTCTGCTCCGGTACCGATGGTGAAGACCGACTTCTTTGCTTTTTCTGGTCCTTACCTGCCGGAAGACGCGCACGGTACCTCTTCTCCGCCGGAGAAACAGCAGCAGACTCGTAAACGTGGCCGTCCGACTGCTCTGGAACTGCTGACTACCCGCGTGGAAGAACTGGAAAAAGAGAACTCTAGCCTGCGCACCTTCCGTACCGCTGCGGAAAGCCGTTGTCGTGCCCTGGAATCCAAGCAGAGCGAACTGTTCCAGACCGTGGAGCAGCTGAAAGTTGTCGTTGCTAAGCTGACGAACGAATGCTCCGCGCGTGTTACTTCTAATCTGCCTGCGCCGCGTCTGTTCGCGGATGTACTGAAAGGCCAAT…	MSEPPPPHSAPVPMVKTDFFAFSGPYLPEDAHGTSSPPEKQQQTRKRGRPTALELLTTRVEELEKENSSLRTFRTAAESRCRALESKQSELFQTVEQLKVVVAKLTNECSARVTSNLPAPRLFADVLKGQSAEKKAEIIAERREAAASISLFEKKTHFAV	bZIP_1
UT245-94	pTH10625	F02E9.2	ggcgcgccATGATCGAAGCGGCGCTGGAAAACCCGGTTCCGATCAAATCTCAGCTGTCTCCGACCCCGCGTTACTTCGGTTCTTGCAAATGGTTCAACGTTTCTAAAGGTTACGGTTTCGTTATCGACGACATCACCGGTGAAGACCTGTTCGTTCACCAGTCTAACCTGAACATGCAGGGTTTCCGTAGCCTGGATGAAGGTGAACGTGTCAGCTACTACATTCAGGAACGTAGCAACGGTAAAGGTCGTGAAGCGTATGCAGTATCCGGCGAGGTAGAGGGCCAAGGCCTGAAAGGCTCCCGTATTCACCCACTGGGCCGCAAAAAAGCAGTGTCCCTGCGCTGCTTTCGCTGCGGCAAATTTGCTACCCATAAAGCTAAGTCCTGTCCTAATGTGA…	MIEAALENPVPIKSQLSPTPRYFGSCKWFNVSKGYGFVIDDITGEDLFVHQSNLNMQGFRSLDEGERVSYYIQERSNGKGREAYAVSGEVEGQGLKGSRIHPLGRKKAVSLRCFRCGKFATHKAKSCPNVKTDAKVCYT	CSD
UT245-91	pTH10626	D2092.10	ggcgcgccATGGACATCTCTCTGCCGGACAACGAACGTTCTATCCGTACCGCGTTCCACAAAAAAAAAGAAGAACTGATCAACGAAAAACGTATGTTCATGGACTGCCCGAAATGCCTGATGATCTTCTTCGATATGATCATGTACCGTATGCACATGGCGATGCACATTCCGCTGCCGTCTACCGACAAAATGTCTCTGGAATCTAGCGACACCTGGAAATGCAGCCTGTGTAAACGTGAATTCAGCGATCGCCGCGAATTCTACATTCACACTGTTAAATACTCCCATTCCCTGATTCCGCGCGGTTTTTTTGTACCGCCGGCACTGCCATATCATTTTGGCCTGCCTGATCTGGCATCCCTGTGTCAGCCATCCGATCTGCTGAAGGAGCTGGCTG…	MDISLPDNERSIRTAFHKKKEELINEKRMFMDCPKCLMIFFDMIMYRMHMAMHIPLPSTDKMSLESSDTWKCSLCKREFSDRREFYIHTVKYSHSLIPRGFFVPPALPYHFGLPDLASLCQPSDLLKELAELVKANATDK	zf-C2H2
UT245-86	pTH10627	F59E11.11	ggcgcgccATGTCTTGCGCGACCTCTCCGGTTTCTTCTTCTGAAAGCAGCATCGGTAGCGTTGAAAGCAACTTCGACCTGAAATGCGAAATCTGCTGCTCCAAAGGTCACGGTAACCACTTCGGTGTCACCGCGTGCCGTGCATGCGCTGCCTTCTTCCGTCGTATGATCGTAGGTACCGGCTACCGTCAGAAATGCCGTTCCTACAAAACTTGTGAACCGAAAGACGGCCGTTGGCAGTGTAAAAAATGTCGTCTGGAAAAATGTTATTCCCTGGGCATGACTCCGGACAACATCCAGCACGATCGTGATCTGTTCCAATGTTCCCTGATCTTTCGCGAAAAAAACCGCAAACGCAAACTGATCGAAGAAAATATCCCAAAAACGGTGGAGAAGATTC…	MSCATSPVSSSESSIGSVESNFDLKCEICCSKGHGNHFGVTACRACAAFFRRMIVGTGYRQKCRSYKTCEPKDGRWQCKKCRLEKCYSLGMTPDNIQHDRDLFQCSLIFREKNRKRKLIEENIPKTVEKILGIPHLILFRKKE	zf-C4
UT245-83	pTH10628	F16B12.8	ggcgcgccATGTCTGCGTGCGACTTCCAGGCGACCTCTAACTCTGAACACAAATACGTTAAAAACCAGGGTACCTGCATGATCTGCCCGAAAAAAGCGAGCGGTCGTCACTACGGTGTTTTCAGCTGCTGCGCATGCAAAATGTTCTTCCGTCGTGTCATCGTAGAAAACCTGTTCTACAAATGCAAACAGAACAAAACCTGTTACGAAAACGAAATCATCACCGGCCGTCAGAAACCGCCGAAATGTCAGGCATGTCGTTTCAAAAAATGTGTGAACCTGGGCATGATGCTGCCGCCGAAAAAGGAACCAAAGAATCTGGACAGCTCCATCACTGCTCTGCAGACTTTTCTGGCTGCTCTGAAGCTGCGCGACGATCATCGCCAGACGCAATTTATGC…	MSACDFQATSNSEHKYVKNQGTCMICPKKASGRHYGVFSCCACKMFFRRVIVENLFYKCKQNKTCYENEIITGRQKPPKCQACRFKKCVNLGMMLPPKKEPKNLDSSITALQTFLAALKLRDDHRQTQFMQYYSVDDPSLEEIIA	zf-C4
UT245-77	pTH10629	C53D5.4	ggcgcgccCAGGAAAACCTGGCGATGCTGGCGAACGTTCCGAAACTGGACGACAACAACGCGTACTTCGACACCTTCTCTCCGGAAAAATCTGGTAAACGTGCGAAAAAACGTGCGGCACCGTCTAGCGCACACGAAGCACAGCCGAACAACGGTCCGTACAAATGCCGTGATTGCGAAAAAACCTTCCGTCAGAAACACGGTCTGAACCAGCACCTGCTGACCCACGAAACCAACGGTGCCTTCGAATGCGATGGCTGTGGCAAACGTTACAGCCGTCAGGAAAGCGTCTATCGTCACCAGCGCTCCACCGCCGAATGTTCCAAGTATCTGCCGCTGGCTCTGATCAATGGCACCGTAGCTCGCAATCCGGTGGCTACTTGGGATACTCCAACTGCTG…	QENLAMLANVPKLDDNNAYFDTFSPEKSGKRAKKRAAPSSAHEAQPNNGPYKCRDCEKTFRQKHGLNQHLLTHETNGAFECDGCGKRYSRQESVYRHQRSTAECSKYLPLALINGTVARNPVATWDTPTAEILQKHRILFEHTMHKIPES	zf-C2H2
UT245-75	pTH10630	F47H4.1	ggcgcgccATGACCTCTATCCACTCTCCGGTTACCCGTAAAGAAGACACCGAACTGAAACGTCCGGACCTGCGTGGTAAATTCGTTTGCTCTTCTTGCTCTCAGAACTTCCAGCACAGCGCGAGCCTGAACCGTCACCGTCAGCTGATGCACAGCAACGAACACACCTGCATGATGTGCGAACGTGCGCTGAACCAGAAAGAAACCATCCGTGAACACATGCGCAACGAGCATAACCTGGCACAGGTCTTCACCTGCGGTTGTTGTAACTGGACCTTTGCAAGCAAACGCCAGCTGACCGAGCATACTAAATGTATCCAGGGTACTGGTGCCCCGGGTGATACTATCCCGATCGCTAAATCCATTAATGCTCCGGGCTCCCTGATTCAATCCACTATTC…	MTSIHSPVTRKEDTELKRPDLRGKFVCSSCSQNFQHSASLNRHRQLMHSNEHTCMMCERALNQKETIREHMRNEHNLAQVFTCGCCNWTFASKRQLTEHTKCIQGTGAPGDTIPIAKSINAPGSLIQSTIQGTPPVVKTGRKRPMGGSLSP	zf-C2H2
UT245-74	pTH10631	Y46H3D.5	ggcgcgccATGGACGACTCTACCGTTTTCTGCTCTTCTCTGCAGACCGACCCGGTTTCTGCGTCTGAACTGGGTGCGATCAAATGCCAGGTCTGCTTCCTGCCGGGTCACGGTATCCACTTCGGCGCATACACCTGCCGTGCTTGCGCTGCCTTCTTCCGTATCGTATCTATCTCTAAATCTAAATGCCACTTCAGCCCGCGTCCGACCCATAAATGCCGTAACAACAGCAACTGTAAACCGAAAATCGATGGCCGTTGGTTTTGTAAAACTTGTCGTCTGACTCGTTGTCTGAGCATCGGCATGAGCCCGGAAAACATCCAGTATGATCGCGATAAATTTGAAAGCATTCTGAAAAGCTCCAAGAACAACCGCCATCTGCAGATTCCAAACACGGTGG…	MDDSTVFCSSLQTDPVSASELGAIKCQVCFLPGHGIHFGAYTCRACAAFFRIVSISKSKCHFSPRPTHKCRNNSNCKPKIDGRWFCKTCRLTRCLSIGMSPENIQYDRDKFESILKSSKNNRHLQIPNTVESQLCISPLVSFSNRREKSSK	zf-C4
UT245-69	pTH10632	T05A10.1	ggcgcgccGTGATTATTTCCGATGACGCTGGTCGTATTCGCCGTGAACGTTTTGCAAACAAATATATCTCTCGCATCCGCCCGAAACATGACCAGATTATCGGCGGCCACCGTACGGACGAAGTGTACGTTTACGTACGCGGTCGCGGTCGTGGTCGTTACATCTGCGATCGCTGCGGTATTCGTTGTAAAAAGCCGAGCATGCTGAAAAAGCACATCAAATCTCATACTGATGTACGTGCTTTCAACTGTACGGCGTGCAACTTCTCCTTCAAAACCAAGGGCAACCTGACTAAACACCTGTCTTCTAAAACTCATCAGCGCCGTATTTCTAATATTCAGGCAGGTAACGATAGCGATGGTACTACGCCTAGCACCTCCAGCATGATGAACATGGACG…	VIISDDAGRIRRERFANKYISRIRPKHDQIIGGHRTDEVYVYVRGRGRGRYICDRCGIRCKKPSMLKKHIKSHTDVRAFNCTACNFSFKTKGNLTKHLSSKTHQRRISNIQAGNDSDGTTPSTSSMMNMDDGYHRNQPLFDDYDNNSSDEEDY	zf-C2H2
UT245-64	pTH10633	R07H5.10	ggcgcgccATGTCTAACGTACTGAACCACGATGATGACCAAACCCATATCTCCGATGAAGGCTTCGGTGAGGAAGACAGCGAAATGCACACTGGCGCGCTGCCTTCCATCGATACCCCGAAAAAGGAGCGCAAGTATGAAAAAGTGAGCGAAGACCAAAAAGACGAAAAATACAGCTCTAAACGTGAGAAAAACAACCTGGCGGTGAAGCGTTGCCGCGAGAAAAAGAAAAACGAAGAAAAATACAAAAAAGAAGCTTTTGAAAACCTGATCCGTTCCAATCTGGTTAAAGACCAGAAAATTGAACAGCTGAACAACCTGGTTCAGTCTGGTAAACAGCGTGAGAACGCACGTATTATGGAAGTTCAGCGTGAAAAAAACATCCTGCGTCAGCTGAAAA…	MSNVLNHDDDQTHISDEGFGEEDSEMHTGALPSIDTPKKERKYEKVSEDQKDEKYSSKREKNNLAVKRCREKKKNEEKYKKEAFENLIRSNLVKDQKIEQLNNLVQSGKQRENARIMEVQREKNILRQLKNELTRIPNAQMLEYYPTLKEVLHY	bZIP_1
UT245-60	pTH10634	F45H11.6	ggcgcgccATGTCTCCTATGGGTTCTGTTTCTTCTTCTGCTGGTTCTGGTTCTCCAAGCCCGATGTCCTCCTTTGACCACCTGAGCGACGAGGAACTGGCTCAAATCAGCGTTCGCCAACTGAACCAGAAACTGATGGGCCAGGACCGTAACGTGGTAATGCAGTGGAAACAGAAGCGCCGTACCCTGAAAAACCGCGGCTACGCGCTGAACTGCCGTGCTCGCCGTGTTAACAACCAGGTGCAGCTGGAAGCGGATAACATGATGCTGCGTAATCAGATTAAAACCCTGCGTGAAGCCCTGAGCGAAGCGCAGATGCGTCTGCATTACTACGAACCGGTATTCTATCAGGCCTATCCGAGCATTGTTCCGTCCACTACTTCCCCGGTCACTGTTTCCC…	MSPMGSVSSSAGSGSPSPMSSFDHLSDEELAQISVRQLNQKLMGQDRNVVMQWKQKRRTLKNRGYALNCRARRVNNQVQLEADNMMLRNQIKTLREALSEAQMRLHYYEPVFYQAYPSIVPSTTSPVTVSLPTIARPIPVPPDSTATVTKFATDFK	bZIP_1
UT245-57	pTH10635	C17E7.5	ggcgcgccATGTGTATTTCTCCTACTCACTTTTTCCATAACATGTCTGTATTTGATACCCCGTCTCCGTCTAACTCTTCTCTGGAATCCTCCCCGTTCAGCCAAGATCTGCAGCAGAAGAAATGCGCCATCTGTTTTCGCCCGGCATTCAGCAACAACTATGGCGTTCTGACCTGCGACGCATGCAAGATGTTCTACCGCCGCATCGTCATCCTGAACCGTGAATACAAATGTAAATATGGTGGCGGCTGCGCACACGTTGCCAAATCCACCGTGGTTAAATGCAAAGGTTGCCGTTACCAGCAGTGTCTGGAGGCGGGTATGACTTTCCAGCCAAGCTTCGCGGAACTGACCAATGAAAAAGACTTCGATGCTGCGACCACCGTAGCTACTCTGCGTT…	MCISPTHFFHNMSVFDTPSPSNSSLESSPFSQDLQQKKCAICFRPAFSNNYGVLTCDACKMFYRRIVILNREYKCKYGGGCAHVAKSTVVKCKGCRYQQCLEAGMTFQPSFAELTNEKDFDAATTVATLRFLDSRRSNAMKTQFTDEDFSLLEVLEK	zf-C4
UT245-148	pTH10636	C54F6.9	ggcgcgccATGTTCTTCCGTCGTGCGATCGTTGAAAACCCGTTCTTCAACTGCAAAAAACTGAACAACTGCTACGAAGTGTCTACCAACTCTAACCACCTGAAATGCGCGGCATGCCGTTTTAAACGTTGTCTGCAGCTGGGTATGAAACTGCCGCCAAGCAACAACGCTATCCTGGAACTGGAAAATCAAAAAGCTCACAAACTGAAAAAGCTGCTGAATGGCCTGATCCTGCGTGACGCCAAGCGCTGTGAACGCCATCTGACTTTTTATACGCGCTCCGACCCTTCCCTGGAGGATATTacctgcagg	MFFRRAIVENPFFNCKKLNNCYEVSTNSNHLKCAACRFKRCLQLGMKLPPSNNAILELENQKAHKLKKLLNGLILRDAKRCERHLTFYTRSDPSLEDI	zf-C4
UT245-140	pTH10637	F55H12.6	ggcgcgccGAAGAATCTACCTCTGCGTCTGCGCTGGACATGCCGTCTTCTCAGAAAGAATCTCGTGAACCGAGCCCGAACAGCAGCATGCTGGACGAAACCAACGGTGGTACCGAAACCGGTGATAGCAGCCCGACCCCGTTCAACCCGGCACGTCCGTTCGGCTGCGTTATCTGCCCATGCTCCTTCCCACGTGTTAAGGATCTGACCATCCACGTTACCTCCGTCCACCGTACTCGCTTCCGCTGTAACACTTGTCTGGCCGAGTTTGTACAGCCTCAACACCTGGAGCACCATTACTCCATTTCCCATGCTGGCACTTCCACTGGCACGGTGGTGAATACGacctgcagg	EESTSASALDMPSSQKESREPSPNSSMLDETNGGTETGDSSPTPFNPARPFGCVICPCSFPRVKDLTIHVTSVHRTRFRCNTCLAEFVQPQHLEHHYSISHAGTSTGTVVNT	zf-C2H2
UT245-134	pTH10638	Y43F8C.10	ggcgcgccATGACCCAGACCTTCATCCGTCTGAAATCTTCTGTTAAAGTTGACCGTGACGAACGTCGTCCGAACTGCCAGCGTTGCGCGCAGCACTCTGTTGTCAACCGTCTGAAAGGTCACAAACGTGCGTGCCCGTTCCGTGACTGCTTTTGTGCAAAATGTCAGGTAGTAGTGGAACGTCAGAAACTGATGGCCGATCAGATCAAACTGCGCCGCCGCCAAAAGCGCGAAAAGAACAACCTGAATAGCGAACGCGAAGCTCCGATCGCTCATAGCATGACCCCGTCCCCGATTGATACCGTGACCACCACTACTACTCCAACTTCCGAGACGTCCACGCCTATGTGTCTGacctgcagg	MTQTFIRLKSSVKVDRDERRPNCQRCAQHSVVNRLKGHKRACPFRDCFCAKCQVVVERQKLMADQIKLRRRQKREKNNLNSEREAPIAHSMTPSPIDTVTTTTTPTSETSTPMCL	DM
UT245-137	pTH10639	F58E10.5	ggcgcgccCCGGACAACAACGAAAACTCTATGCCGGAAATCCCGATCGACGGTGGTTTCAACTTCTTCCCGGCGCAGGAAGTTCAGGAATGGAAACCGGCGCGTAAAGCATCTAAAAACAAAATCAAAAAAATTTCTACCATGCACATTAACAGCAGCTGCTCCAACTGCGGTTGCCGTGAAACTAAACTGTGGCGTCGTAACGAACAGGGCGAAACGGAGTGTAACCCGTGTAACCTGTACGAGCGTGTCAAAGGCCACAAACGTCCGCAACATCTGTGGAACAAGCCAGCAGCTAAGCGTCGCCGCCGCCCAGTAGCTCCTCTGGTGGATTCCAATGCCTTCAATTTTacctgcagg	PDNNENSMPEIPIDGGFNFFPAQEVQEWKPARKASKNKIKKISTMHINSSCSNCGCRETKLWRRNEQGETECNPCNLYERVKGHKRPQHLWNKPAAKRRRRPVAPLVDSNAFNF	GATA
UT245-136	pTH10640	C27C12.6	ggcgcgccATGATGATCGGTAACCTGCACGTTTTCCCGAACGGTCGTATCGAACGTGAACGTAAACCGAAATGCGCGCGTTGCCGTAACCACGGTCTGGTTTCTTGGCTGAAAGGTCACAAACGTCATTGCAAATACAAAGAATGCGCGTGTGAAAAGTGTAACCTGATCGCGGAACGTCAGCGTGTTATGGCGGCACAGGTCGCACTGAAGCGCCGCCAGGCAACCGAAGACGCTATTGCTCTGGGTCTGCGCGTAGTGGCTGGCCAGGCCATTGACCGCCTGCCACAAGGCCCTGTGTGGAATACTGCCGGCGGCGAAGACGAAGATATGGATTATCTGGATGAGGAGacctgcagg	MMIGNLHVFPNGRIERERKPKCARCRNHGLVSWLKGHKRHCKYKECACEKCNLIAERQRVMAAQVALKRRQATEDAIALGLRVVAGQAIDRLPQGPVWNTAGGEDEDMDYLDEE	DM
UT245-130	pTH10641	F21D5.4	ggcgcgccATGACCGAAATCTCTCCGAAAATCCTGGAAACCTCTAGCGAACCGCCGCCAAAAAAAAAACGTGCGAACTTCACTCTGGAATTCAAAAACGAAGTTATCCGTTTCGCGGAACAGACGAACAACTGCCAGGCGCAGAAAAAATACGGTGTCGCACGTGCATGTATCCAGCGTTGGCGTCACCTGAAACATGAACTGGCTTTTGAAAGCGAAGGTAAACAAGGTGCTAAACGCCTGGGTGGTGCTGGCCGCCCTCTGAAAAACGTAGAACTGGACGAGAAAGTGGAGGACTGGATCGCCTCCAAAAACGGCAAAATTTCCGGCAAGGATATTAAGGAGTATGCCAAGAAGATTAATGGCacctgcagg	MTEISPKILETSSEPPPKKKRANFTLEFKNEVIRFAEQTNNCQAQKKYGVARACIQRWRHLKHELAFESEGKQGAKRLGGAGRPLKNVELDEKVEDWIASKNGKISGKDIKEYAKKING	BrkDBD
UT245-122	pTH10642	C16A3.9	ggcgcgccATGGGTCGTATGCACAACCCGGGTAAAGGTATGGCGAAATCTGCGATCCCGTACCGTCGTTCTGTTCCGTCTTGGCAGAAAATGACCGCGGAAGAAGTTCAGGACCAGATCGTTAAAATGGCAAAAAAAGGTCTGCGTCCGAGCCAGATCGGTGTTATCCTGCGTGACAGCCACGGCGTCGGCCAAGTACGTCGTCTGGCAGGCAATAAAATCTTCCGTATCCTGAAAAGCAAAGGCATGGCCCCAGAACTGCCTGAAGACCTGTACCACCTGGTAAAAAAAGCTGTGGCTATCCGTAAGCATCTGGAACGCTCCCGCAAGGATATTGATTCCAAGTATCGCCTGATTCTGGTGGAGTCCCGCATTacctgcagg	MGRMHNPGKGMAKSAIPYRRSVPSWQKMTAEEVQDQIVKMAKKGLRPSQIGVILRDSHGVGQVRRLAGNKIFRILKSKGMAPELPEDLYHLVKKAVAIRKHLERSRKDIDSKYRLILVESRI	PAX
UT245-120	pTH10643	F44C8.11	ggcgcgccATGCTGTCTTTCGGTCTGTGCGCGGTTTGCGGTCAGGTTACCACCGGTAAAAACTTCGGTGTTATCTCTTGCCGTTCTTGCGCGGCGTTCTTCCGTCGTGCACCGACCTGGTCTCGTCGTTTCCCGGAATGCGTCAAAGCAAGCTGCGCCATCTTCGAAAACGGCAAATTCAAATGTAAAAAATGTCGTCTGAAACGTTGTCAGGAAGTAGGCATGGACGTGAAAAAGATCCAGCAGAACCGCGATCTGATTAGCACTAGCAATATGTTCCAAAAGCGCGTGACTCTGATTTTTGGCCCGGCTCACTCCATGTCCACGTTTCTGGGCCGCCCATCCTTTCTGCTGCACTGTGAACCTGAGCTGGCTTCCCATacctgcagg	MLSFGLCAVCGQVTTGKNFGVISCRSCAAFFRRAPTWSRRFPECVKASCAIFENGKFKCKKCRLKRCQEVGMDVKKIQQNRDLISTSNMFQKRVTLIFGPAHSMSTFLGRPSFLLHCEPELASH	zf-C4
UT245-119	pTH10644	C25E10.1	ggcgcgccATGCACCGTTCTACCTGCAAAATCTGCGGTCTGGCGGCGCACGGTGTTCACTTCGGCGTTACCGCGTGCCGTGCATGCGCAGCTTTCTTCCGTCGTTTCGTTGTCCTGAACCTGGAATACGAATGCCTGAAAGACGAAATCAAATGCAACCTGAACAAAATCCGTCGTTCTTCTTGTCGTCATTGTCGTTTTCAGAAATGTCTGCGTATGGGCATGACTGCTGACAACGTACAGTGGAACCGCGACGTGTACAGCAACGAAATGCGCTACCGCAAACTGAAGATCCAAGAAATCCGCAACGATGAGAATGATGCTAGCATTGCCTATCCGTGTAATTCCCTGCCATCCACGTCCCTGTATCCTGTGATTAAGacctgcagg	MHRSTCKICGLAAHGVHFGVTACRACAAFFRRFVVLNLEYECLKDEIKCNLNKIRRSSCRHCRFQKCLRMGMTADNVQWNRDVYSNEMRYRKLKIQEIRNDENDASIAYPCNSLPSTSLYPVIK	zf-C4
UT245-111	pTH10645	F54D1.4	ggcgcgccATGCAGTCTTACACCAACCGTATCTGCGCGGTTTGCGGTGACACCCCGGCGAAAATTCACTACGGTGTTCTGGCATGCTTCGGTTGCAAAGGTTTCTTCCGTCGTGCTGTTAAAGACGGCCGTAACAAATACGTTTGCCGTTTCGAAAAAAACTGTGAAGTCACCAAATTCGAACGTAACGCTTGTCGTTACTGTCGTTTTCGTAAATGTCTGCTGGTAGGCATGAATCCGGACTATGTACGCCCGGATCGCGAGAAATCTAAAAAAGGCAAAACTGTGCTGTCTAAAAAGAAGTCTGTGTCTCGCAGCCTGAGCTATCGCCTGGCCGATCCAAGCGATTGGACGAGCTTTCTGTCCCCTTCCTCCCGCAAGCAACTGTCCacctgcagg	MQSYTNRICAVCGDTPAKIHYGVLACFGCKGFFRRAVKDGRNKYVCRFEKNCEVTKFERNACRYCRFRKCLLVGMNPDYVRPDREKSKKGKTVLSKKKSVSRSLSYRLADPSDWTSFLSPSSRKQLS	zf-C4
UT245-109	pTH10646	T07C5.5	ggcgcgccATGGACTGCATCACCCGTTCTTGCAAAGTTTGCAACGAAAAAACCACCGGTTTCAACTACGGTGTTCAGTCTTGCAACGCGTGCAAAATGTTCTTCCGTCGTGCACTGGACACCCCGAAAGTTCTGAAATGCGGTCGTGACGGCAACTGCCCGACCATCGTTCTGGACTCTGGCGAAAGCCAATGTCGTTTCTGTCGTTTCCACAAATGTATCATCGTCGGCATGATCTTCCTGGACGCTGTAGATGATCCGACTAACATCATTAACAAGCTGCTGGTAATGGATACTAAGCGTCGCGATATTTTCCTGAATTGTACTATTCCGGAAAGCCTGACGGTGGATGAAGTGTTTTCCCGCCGCTCCTTTCCATTTGAGCCTCGCacctgcagg	MDCITRSCKVCNEKTTGFNYGVQSCNACKMFFRRALDTPKVLKCGRDGNCPTIVLDSGESQCRFCRFHKCIIVGMIFLDAVDDPTNIINKLLVMDTKRRDIFLNCTIPESLTVDEVFSRRSFPFEPR	zf-C4
UT245-104	pTH10647	Y22F5A.1	ggcgcgccATGCTGCAGGAACCGACCTCTTCTACCCTGACCTGCAAAATCTGCTGCGAACCGGCGCACGGTGTTCACTTCGGTGTTGCGTCTTGCCGTGCGTGCGCAGCATTCTTCCGTCGTACCACCGTTCTGGGCAAAAAATACACCTGCCGTCAGAAAAACGAAAAATGCACTACTAACAACGAAGACCGTTTTAACTGTCGCTACTGTCGCTACCAGAAATGTCTGAGCAACGGCATGACTCCGGAAAACGTCAAATACAACTATGACGCTGCTGTACACTATAATAAAAAACCGAGCCCGAAAATGAAGATCGACGCCCATGAGCCGCCGAGCGATCCATCCTCCCCAGTAAATTCCGATCATAAGATTTGTGTGCCTCAAACGAAGGATGTGa…	MLQEPTSSTLTCKICCEPAHGVHFGVASCRACAAFFRRTTVLGKKYTCRQKNEKCTTNNEDRFNCRYCRYQKCLSNGMTPENVKYNYDAAVHYNKKPSPKMKIDAHEPPSDPSSPVNSDHKICVPQTKDV	zf-C4
UT245-31	pTH10648	F47E1.3	ggcgcgccAACATCGTTCACTCTAAAGTTGTCACTGATATTGCTTGTGGCGCGGAAATTGTGATCTCCCGTACCCCGACTGAAGACCGTAAATCTGAAGTTGAAGAACCGGAGATCATTGACGACGTGGCCAAAAAGAACGAAAACGTGTCCAATGGCTTCTCTTGTGAACGCTGCGGCAAAGTTTTCAGCTACGAATATTACCGCGACAAACATCTGAAATACACGCGTTGTGTGGACAACGGTAACCGTAAATTTCCGTGCACTATTTGTAACCGCTCCTTCGAAAAACGCGATCGTCTGCGTATCCACATCCTGCACGTTCACGAAAACCATCGTCCTCACGTCTGCTCTGTATGCCAGAAGTCTTTCAGCCAGTCCAGCAGCCTGAATAAACACC…	NIVHSKVVTDIACGAEIVISRTPTEDRKSEVEEPEIIDDVAKKNENVSNGFSCERCGKVFSYEYYRDKHLKYTRCVDNGNRKFPCTICNRSFEKRDRLRIHILHVHENHRPHVCSVCQKSFSQSSSLNKHLRVHSGERPYKCSFCPKAFTASSILRTHVRQHSGEKPFKVRKRTIYDYVDFL	zf-C2H2
UT245-98	pTH10649	C27A2.7	ggcgcgccCAGCGTTCTTCTGTTCGTTTCCCGACCTACGACGGTCTGCTGCCGGCGGGTGGTACCTACATCTGCGACGAATGCAACTCTGACGAACGTACCCCGTTCCAGCTGTGCGAACACAAAGCGATCTACCACAGCCCGCAGGATCAGCGTGTTTGGAAATGCGTTTACTGCCACACCCAGTTCGGTCGTCGTGGCGGCCTGCGTCGTCACGTCCAGATGGTACACATGCAGATGATGCACAAATGCCCGGTAGAGAACTGTACCCACCCGGGCTATAAATGTACCAAAGCGCTGAACGCACACGTGCGCACTCACACTCGCCCATATGCATGTCATCGCTGTGATGCTAGCTTTGCTCGCAAGAATGATCTGCAATCCCATCTGTCCACTCATC…	QRSSVRFPTYDGLLPAGGTYICDECNSDERTPFQLCEHKAIYHSPQDQRVWKCVYCHTQFGRRGGLRRHVQMVHMQMMHKCPVENCTHPGYKCTKALNAHVRTHTRPYACHRCDASFARKNDLQSHLSTHQATPVIH	zf-C2H2
UT245-41	pTH10650	C13C4.2	ggcgcgccTATAGCCACCAGCAAGCAACTCATGAATACCACCTGCCTGATCAAGAGGTTTTCCAGAACCAGAACGAGTTCTCCGCGAGCCCGCCGGACATCTCTTCTCCGTTCGCGGACGAGAAAATTTACAAATCCCTGCCACGCAACAAATGCCCGTCCAAATGCCTGGTTTGTCGCAACCCAGCTATCGGTTACCACTATGATGTACCGAGCTGTAACGGCTGTAAGACGTTCTTCCGTCGTACCATTATCACCGGTCGTAAATTCACCTGCGCAAAACAGAAGAAATGTATGGACGGCACCGAACCGGTTGACATGTCCAAACGTCTGTGCCGTGCCTGCCGTTTTGCTAAATGCGTTGAAGTTGGTATGAACCCGATGGCTATTCAGGCGGAAG…	YSHQQATHEYHLPDQEVFQNQNEFSASPPDISSPFADEKIYKSLPRNKCPSKCLVCRNPAIGYHYDVPSCNGCKTFFRRTIITGRKFTCAKQKKCMDGTEPVDMSKRLCRACRFAKCVEVGMNPMAIQAEVKTDEGKVLRSEVLNQRESLGVVSSLIVTEEDLLSRMIEKLTFV	zf-C4
UT245-85	pTH10651	ZC8.4	ggcgcgccGCGTCTGAAGCGGAACGTGTTGCGGCAGAAAAAGCACGTAAATTCCTGGAAGACGAACTGGCTAAACTGCAGGCTTCTTTCCAGAAATCTAGCACCGACGACGCCCGTAAACTGCGTGACGAAATGGACGAACACACCAACAGCATCCAGGAAGAATTTAAAACCCGTATCGACGAACTGAACCGTCGTGTCGAAAACCTGCTGCGTGAAAACAACCGTCTGAAATCCGAAGTAAACCCGCTGAAAGACAAATACCGTGACCTGGAAAACGAATACAACTCCACTCAGCGTCGCATCGAAGAAAAAGAGACTCAGATCCGCTACTCCGATGATATCCGCCGCAATATTCAAAAGGATCTGGATGATCTGCGCGAGAAGTATGATCGCGTGC…	ASEAERVAAEKARKFLEDELAKLQASFQKSSTDDARKLRDEMDEHTNSIQEEFKTRIDELNRRVENLLRENNRLKSEVNPLKDKYRDLENEYNSTQRRIEEKETQIRYSDDIRRNIQKDLDDLREKYDRVHTDNEKILGELEH	bZIP_1
UT245-150	pTH10652	Y55F3AM.7	ggcgcgccGAACTGAAAACCGAACCGATGGACGACTACTCTTACAACTTCTCTGATAACGACTTCAACTCTTTCAAATTCTCTAGCACCCCGGAAGAACCGAAAAACATCGGTTGCCAGAAAATGAAAAGCAGCAAAATGCACCTGCAAGACCGTCCGTATAAATGCCCACGTGATGAATGTGATAAAAAATTCTCCCGTTCCGATGAGCTGACCCGCCACATCCGCATTCATACTGGCCAGAAGCCTTTTCAGGTTCTGACTGCGACGTCCAATCAAAAGTTTAAGTCCacctgcagg	ELKTEPMDDYSYNFSDNDFNSFKFSSTPEEPKNIGCQKMKSSKMHLQDRPYKCPRDECDKKFSRSDELTRHIRIHTGQKPFQVLTATSNQKFKS	zf-C2H2
UT245-146	pTH10653	C32E8.1	ggcgcgccATGAAACAGGAAGACTGCCGTTCTAAACGTATCGCGGAACAGGTTGGTCACGACGCGGTTCCGGTTAAAAAAGTTCCGTGGGAAGAACAGCAGCTGATGAAAAAAGTCAAACGTCTGCAGTCTGAAAACGAAAAACTGAAAGTACAGCTGGACGACATGGTCGATTGCTTCGTAGAAACCAAAGAAGCACTGGAAAAAGAGAAACGCGTGACCGATTTTCTGAAGAAGGCTATCAGCGATCTGAAGACTCTGCCAATCGAGTGTGAGATTTGTGCCGTGCAATACGGTGATTCCGGCATGACGGTGCCTCGCacctgcagg	MKQEDCRSKRIAEQVGHDAVPVKKVPWEEQQLMKKVKRLQSENEKLKVQLDDMVDCFVETKEALEKEKRVTDFLKKAISDLKTLPIECEICAVQYGDSGMTVPR	bZIP_1
UT245-141	pTH10654	R03E1.4	ggcgcgccATGGAAAAATCTAAAAAAACCCGTCAGAACTTCAAAATCGCGGAACTGGGCCTGCTGAAAGAATCTTTCGAAAAAGACTCTCACCCGGGTACTTCTGAAATGAACCGTCTGGCGGGTCTGCTGAACCGTAACGAAGCACAGATCAACCGTTGGTTTAAAGCTATGCGTGTTAAAGTTAAAAAGGCTTCTCTGAAGATGTCTCGCGAAGTCACGAGCCAGAGCGGTAGCAACGTAGAACTGCTGGGCAGCAGCATCGTGCCGGAGCCACCTTCCTCCGAGATTGTGTCCTCCCAGGCCCAATACCGCCTGGAGAACATGAAGCTGCTGTCCAATacctgcagg	MEKSKKTRQNFKIAELGLLKESFEKDSHPGTSEMNRLAGLLNRNEAQINRWFKAMRVKVKKASLKMSREVTSQSGSNVELLGSSIVPEPPSSEIVSSQAQYRLENMKLLSN	Homeobox
UT245-139	pTH10655	F53H4.5	ggcgcgccATGGTTACCAAACTGTTCACCTGCCCGGGTATCCACCAGAACTGCATCCTGATCGACGGTGAAACCGAATACATCTCTCCGAAAGAATTCACCGTGCGTGCGAACAAAGATAAACAGAAAGACTGGAAAGGTTCTATCCGTATCGGCAAATCTAACCTGCGTACCCTGATGGAGATGCGTTCTCTGGACTTCCACGATCACCCGAACCAGTGTTCTGCAAAATGTCAGAGCCGTAACTATATTACTCCGAAGGACCCGACTAGCGATCCGAGCGGCCGCCGCCGCTCCTCCACTACGAAGCTGATTCCACAAAATATGTTTTCCCATATTCCTTCCGCTacctgcagg	MVTKLFTCPGIHQNCILIDGETEYISPKEFTVRANKDKQKDWKGSIRIGKSNLRTLMEMRSLDFHDHPNQCSAKCQSRNYITPKDPTSDPSGRRRSSTTKLIPQNMFSHIPSA	SAND
UT245-132	pTH10656	C28C12.8	ggcgcgccATGGCGAAAAAACCGCGTGTTACCAAACTGAACACCGACCGTCGTTCTCGTGCGAACGAACGTGAACGTCAGCGTGTTTCTGAAATGAACGGTATGTTCGACGTCCTGCTGAACCTGCTGCCGCCGTCTCACTTCAAAACCCGTCTGTCTCGTGTACAGATCCTGCGTGAAGCAACTAGCTACATCATCCGCCTGCACAACTTCCTGATCGAAAGCAGCAACTCCGACATCGATGCAATCACGGTGTTCCCACATATTTTTAACGGTGAGCGCAAATCCAATAAAGATGCTATTCGCCGCCCTATGAAGCTGAAGCAAGGTGGCGGCGTGGCTGCCTTTATTTCCCGCacctgcagg	MAKKPRVTKLNTDRRSRANERERQRVSEMNGMFDVLLNLLPPSHFKTRLSRVQILREATSYIIRLHNFLIESSNSDIDAITVFPHIFNGERKSNKDAIRRPMKLKQGGGVAAFISR	HLH
UT245-124	pTH10693	R11G11.2	ggcgcgccATGCCGTGCTGCAAAGTTTGCACCGCGGAAGGTTGCCACGGTACCCACTTCGGTACCATCTGCTGCCGTGCGTGCGCAGCCTTCTTCCGTCGTACTGCTTTCTCTAAATCTTTCTGTAAACCGTGTCGTCTGCGTAAATGTCTGGAAGTCGGCATGGAAACTTCTAACTTCCAGTACCACCGCGACTCTCTGCATGATAGCGAAAGCAGCTCCGTATTCAAAAAACTGGAAGCTAAACATTCCAAACAAACGATCTCCAAGATCCCAAAGTCCTTTGAGTGTTTTGTGGGCCGCCCTGGCATGATTCTGTTTacctgcagg	MLISIEFCKICDRKSQGIHFGVPSCRACAAFFRRRAGSDLVEKSCMNKKCGKEFFLCKPCRLVRCYAVGMDEKKFQFDRDALASTVLLNTIPKSFDKFVGRPQFVHFCDPSAPSTSKFIDVR	zf-C4
UT245-129	pTH10696	Y44A6D.3	ggcgcgccATGTCTTCTGACGTTCGTAAAGCGCTGGACCCGGGTACCCCGTACTCTCGTACCCTGAAATACTCTATCGACGAAAAACTGGCGATCATCTCTCACGCGAAAAACCACGGTAACCGTGCGGCAGGCCGTGAATTCAACGTAGCAGAAAGCAGCATCCGTGAATGGCGTAAAAACGAGAACAAACTGATTCACAACCGCGATGCAGCCGCCGCTCGTCTGAACGCTCAGTCCAGCCACTCCTCCGGCCCGGCTCGCCTGAACAACATGAACAATAATAATAACAACAACCATAACCATTCCAAGAACAATAACATTCAGTATACCCAAACTGTGTTTCCACGCCGCACGCCTGATGATacctgcagg	MSSDVRKALDPGTPYSRTLKYSIDEKLAIISHAKNHGNRAAGREFNVAESSIREWRKNENKLIHNRDAAAARLNAQSSHSSGPARLNNMNNNNNNNHNHSKNNNIQYTQTVFPRRTPDD	BrkDBD
UT245-118	pTH10697	F41B5.10	ggcgcgccATGTTCAAATGCCAGATCTGCGAACAGCCGGCGCACGGTCAGCACTTCGGTGTTGTTTCTTGCCGTGCGTGCGCGGCATTCTACCGTCGTGCAACCCTGAACCCGAAAAAAAAAATCCTGCCGAACTGCATCCATGAAGACGGTAAAAAAATGGACGAAAACGGCGTCTTCTCTTGTCGTCGTTGTCGCCTGAAAAAATGTCTGAAAAAGGGCATGGACGCCTCTAAGTTTCAGCTGGAACGCGATCTGATTAGCAGCAGCCTGTCCATGGCTGAAATTCCGCAAACCCTGTCCACCTTCCTGGGCCGCCCGAACTTCCTGCTGTTTTGTAATCCACTGGAGCCTTCCACTACTGCTAAGACGGTAGTGGATacctgcagg	MFKCQICEQPAHGQHFGVVSCRACAAFYRRATLNPKKKILPNCIHEDGKKMDENGVFSCRRCRLKKCLKKGMDASKFQLERDLISSSLSMAEIPQTLSTFLGRPNFLLFCNPLEPSTTAKTVVD	zf-C4
UT245-115	pTH10698	R02D1.1	ggcgcgccATGGACCTGGTTTCTACCTCTACCTCTCCGTTCTCTTGCCGTATCTGCAACCAGAAAGCGCACGGTAACCATTTCGGTGTCCTGACCTGCCGTGCGTGCGCGAGCTTCTTCCGTCGTGCAGCATTCAGCAAATGGAGCCAGCTGAAATGCCAGAAAGGTGGTTGCTCCCGTAACTTCTGTAAACGTTGTCGTCTGAAAAAATGTCGTGAAATGGGCATGGACACCACTAAGTTCCAGTACAACCGCGACTCCTTCCGCGCTACTGGCCAGTTCCAACTGCCGCCGCCGCGCTCCCTGGCTTCCTTTGTAGGCCGCCCAGAACTGTTTCTGTTTTGTGATACGGAGGCTCCTAATGCCAAGATGCTGATTGATGTGacctgcagg	MDLVSTSTSPFSCRICNQKAHGNHFGVLTCRACASFFRRAAFSKWSQLKCQKGGCSRNFCKRCRLKKCREMGMDTTKFQYNRDSFRATGQFQLPPPRSLASFVGRPELFLFCDTEAPNAKMLIDV	zf-C4
UT245-107	pTH10699	C09G12.1	ggcgcgccATGAACCTGCCGGAATGCTCTTCTTCTCCGCCGCAGTCTGCGCAGAACTCTGAAGAACGTCGTGTTCGTCGTCTGCGTACCGCGTTCAGCGAAAACCAGCTGGAACTGCTGGAAGAAGCGTTCCTGAAATGCCAGTACCCAGACGTACAGCAGCGTGAAACCCTGGGTAAACAGACCGAACTGGCAGAAGCACGTATCCAAGTGTGGTTCAAAAACCGTCGCGCAAAAGCTCGCAAACGCCAACGCAACGAAAGCACCGACAGCTGTTCCACCACCGAAGAGTCCAACGAGGAGGGTGATGCTGATGGCTGTCTGAAAAAAAAGGCTAAGAACGAGACTACTATCATTACTTGGACGCCTGGCGCCGCCCTGTTTAATTCCTCCCTGacct…	MNLPECSSSPPQSAQNSEERRVRRLRTAFSENQLELLEEAFLKCQYPDVQQRETLGKQTELAEARIQVWFKNRRAKARKRQRNESTDSCSTTEESNEEGDADGCLKKKAKNETTIITWTPGAALFNSSL	Homeobox
UT245-26	pTH10700	B0414.2	ggcgcgccATGACCAATGTGTTCCACCACGTGCGTAACTTTATTGAGCAGCAACCTGCACCTGCTAAGACGCTGGAAAAATCTAGCTCCCCGAACATCCTGTACACCGCACTGCCGAAACATTGGCGTTCCAACAAAAGCTTCCAGGAACCGTTTTATGTAGTGCTGCTGACCCCGGTTCCGGATAATACCGAGGTTAGCATTTGGGCTGGTAACGACGAAAAACCGTGCGAAGAAGTGCGTAACGAAAAAGCTAAAGTCCACCGTCAGGTAGCCAAATTTAACGACCTGCGTTTCGTTGGCCGTTCCGGCCGTGGCCGCAAATTCCACCTGACCATCGTTATCCATTCTGCCCCGATGATGGTCGCGACCGTTAAGAACGTAATCAAAGTTACCGTTG…	MTNVFHHVRNFIEQQPAPAKTLEKSSSPNILYTALPKHWRSNKSFQEPFYVVLLTPVPDNTEVSIWAGNDEKPCEEVRNEKAKVHRQVAKFNDLRFVGRSGRGRKFHLTIVIHSAPMMVATVKNVIKVTVDGPRDARIPKPQGSLKRQAEQQTIFPNDIIRTPGPPMPMTMIPPPWFPLPMTQTFPPSFFPL	Runt
UT245-27	pTH10701	Y55F3BR.5	ggcgcgccAAATCCCCGGAAATGAGCCAGACTCCACCTAAAGATGAAAACAACGAACTGGAATTCGGTATCCCGACCAAACGCTCCCGTTCTGGTCGTCCGAAAAAGATTTGCGCGTTTTCTTCTTTCAAATGTTATGAAGAACGCGACATCGAATTCTTCATCCATCAGGTTAGCGATAACCAGATTATCTGGGACCGTCGTAACAGCCTGAACTTCGACGGTAACCTGGTGCACGCCACGTTCGATAAAATTGAAATCTGTTGCCAGTTCCTGGCGCGCAAAAACGGCGAGAACGCTTCTCGTCTGTGGACCGAACTGGCCAGCGAATACAAACGCGAAAAAGCTCGTATCGAACAGCTGCCGTCTGGCATTTACTCCGAAGAATTCGAAATTCGTT…	KSPEMSQTPPKDENNELEFGIPTKRSRSGRPKKICAFSSFKCYEERDIEFFIHQVSDNQIIWDRRNSLNFDGNLVHATFDKIEICCQFLARKNGENASRLWTELASEYKREKARIEQLPSGIYSEEFEIRFPFMQQMWFLEIEASELKEADSNSLEETIVNFARQKSINDAPSPSSSLSAPIEHLNSSIN	MADF_DNA_bdg
UT245-28	pTH10702	C12D12.5	ggcgcgccCCAACCGAATCTCCGAATGTGATCAGCTCTGTTCAAGCATCCACTATCGCCGACATCATTGGTCACTATGTGAACGGCAATTCCATTAAGGATGTTGTAAACAGCTCCCAAAAGTCTGCGTCCCAGCCGCGTACGGCCCGTGAGCCGCGTATCAAGCGCCCGATGAACGCTTTCATGGTGATTAACGTGCAGACCTGGAAAATCCGCAAATCCAACGACTACATCAAAGTTTGGTCTCAGCAGCGCCGTCAGCAGATCGCAGCGACTGGCCAGAAATTTCATAACAGCGACATTAGCAAAATGCTGGGTGCAGAGTGGCGCAAAATGGAGGAACACGAAAAAGTTCCGTTCGTTGAACGTGCGAAACAGCTGCGTGAAGAACACTTTAACG…	PTESPNVISSVQASTIADIIGHYVNGNSIKDVVNSSQKSASQPRTAREPRIKRPMNAFMVINVQTWKIRKSNDYIKVWSQQRRQQIAATGQKFHNSDISKMLGAEWRKMEEHEKVPFVERAKQLREEHFNAHPDYVYRPRRRKRVEKSAGSVDSNSADEITKPVNVYNSSTYTNVFSQLFFKLLCD	HMG_box
UT245-33	pTH10703	C54G6.1	ggcgcgccGAAGCTGATCAAAAGGATTATAAAAACTCCGACGGCGAACTGCTGCCGGAGCACAACCCTGCTGCGCCGATCAACCGCAAACGTGGCACCCTGAAAACCGAACTGGAAACTTTCTACGATGTCCCGCAGGTTCGTACCCTGACTTGCGAACTGCTGGATATGGTTAAAGAAGAGCCGTCCATTTGGGACAAAATCCGTTGTGTTGACTTTGGTTGTCACCAGCGTATGCGTCAGGCCTGGTGCTCTATTAGCCTGAAACTGGGCGGTTGGGGTGCTATCCAGCACGTGCATATGCTGAAACAACTGTACCGCAAAAAGCGTGATCTGTATAATGTACAGTACCTGCGTTCTGGTCGCGAGTTCGAGTACTGCGAAAAACTGAGCTTCCTGA…	EADQKDYKNSDGELLPEHNPAAPINRKRGTLKTELETFYDVPQVRTLTCELLDMVKEEPSIWDKIRCVDFGCHQRMRQAWCSISLKLGGWGAIQHVHMLKQLYRKKRDLYNVQYLRSGREFEYCEKLSFLKDVLEMAKNDPLDKNIQLDEHLKTATPIIDFDAELLAAPAEIQQILREIS	MADF_DNA_bdg
UT245-38	pTH10704	T19H12.8	ggcgcgccCTGTATATCTTCCAGAAACTGCTGATCCTGACTCAACTGATGCGTTCCCTGTTCGCAAGCTACCATCTGTTTTGTTGCCTGCGTCTGTCCGACTACTCCCACACTAAACCGGCTCTGCTGTTCAACTCTAAAACCATGACCAAAATCCTGTTCCCGTGCCGTATCTGCGGTAAGAAAGCTCACGGTACGCACTTCGGCGTTTTCTCTTGCCGTGCTTGCGCGGCATTTTTCCGTCTGGTATTCTCTCTGATCCTGGGTATGGCGATCAGCTTCCGTTCTTGTATGGAGATCTTTGTCAAATGCCTGGCCAAAGGCGGTAGCGGTAACGAATGTCTGTGCAAACCGTGCCGTCTGAAGAAATGCTTTGAAACCGGCATGGACCCGTCTTCTT…	LYIFQKLLILTQLMRSLFASYHLFCCLRLSDYSHTKPALLFNSKTMTKILFPCRICGKKAHGTHFGVFSCRACAAFFRLVFSLILGMAISFRSCMEIFVKCLAKGGSGNECLCKPCRLKKCFETGMDPSSFQYNRDSIWGVAQSPVPPSFSYFVGRPEFLILCDPIRCSPKTLINVDN	zf-C4
UT245-39	pTH10705	C09G9.7	ggcgcgccCAGAAAGCACTGTCTAATGGTCATCCATCTGGTTCTTCTCTGGCAGCGCTGGAAAAACTGTCTAAAGCCTTCCGTCGTCCTGACCTGCACATCGAAAAGCTGGCGTCCAGCTGCATTGACAAACAGAAAGATCTGAAAATGACTAACGTAGTTCCGAGCCGCAACCGTTACGGCCGTCCGTACATTTCCGGCCGCCCGCTGCTGACCTGTGATCGTCAGAAGATCGTGGAATGCTACAAGAAAGGTATGAAAAAGATTCACATCGCTAAACAGCTGGGTATCACTCACTCCTGCGTTTCCAAAGTCCTGCGTCGCTACGCTGAAACGGGCGAAATCGTGGCTAAAGCATGTCGCACCGCGTCTTGCTCCTGCCCGGGCTCTGCCGAGGAAC…	QKALSNGHPSGSSLAALEKLSKAFRRPDLHIEKLASSCIDKQKDLKMTNVVPSRNRYGRPYISGRPLLTCDRQKIVECYKKGMKKIHIAKQLGITHSCVSKVLRRYAETGEIVAKACRTASCSCPGSAEEHDARYCKHLQDNTIRLFFSIENLLRNESTSSRIIYFSKPPSYSTLEI	PAX
UT245-42	pTH10706	F48G7.3	ggcgcgccGGTGCCCTGCTGGTAATGCCACTGTTCGGTACTGTTGCTCAACTGAAACTGGCGACCGCTGACCCGAAACACGTTTCCGAATACCGCGAAGTTATTACCGAAAAAGCGGAACACCTGCTGGATGATATGGAACCGCCACTGTACCTGAGCGGTCCGTGCGTGATCTGTGACCAGCCGAGCCATGGTCGCCACTTCGGCGTCCTGTCCTGCCGTGCATGCGCAGCGTTCTTCCGTCGTGCCCTGCGTCGCTCCGCTAAATCCCAGGATATGGTATGCGAACGTGAAAATTGCTCCCTGGAGGACGGCATTCAGTATTGTAAGATCTGTCGTCTGAAGAAATGCTTCAACGCAGGCATGGACCCTAACAAATTTCAGACGTCCCGTGACCTGA…	GALLVMPLFGTVAQLKLATADPKHVSEYREVITEKAEHLLDDMEPPLYLSGPCVICDQPSHGRHFGVLSCRACAAFFRRALRRSAKSQDMVCERENCSLEDGIQYCKICRLKKCFNAGMDPNKFQTSRDLISSSSQSSDLPSVSPSQSLASILGRPELILFCSLDRASPSR	zf-C4
UT245-100	pTH10707	F52C12.5	ggcgcgccTCTCCGTCTGCGTCTGTTGAACAGACCCTGCTGGACCAGCTGTCTATGCAGTTCAACGGTAAATCTCCGTCTCCGACCGTTCACGCGTCTACCGCGGCGGCGGCAGGTAGCAGCGAAGACGACACCAGCGCAAACAGCAGCATCTCCAAATGCTCCAACTGCTCCACCATCAAAACCACTGCATGGCGTCGTGATCTGGAAGGTAAACTGGTCTGTAACGCATGTGGTCTGTACTATCGTCTGCACCGTACTCACCGTCCGGTACATATGCGTAAGGATTTCATTCAGCAGCGTTTCCGCCGCCGCATGCGCGAAGATGAGAACCCAGCTACTTCCCAGGCTGCTGTGTTTTCCCAACTGCTGGGCCTGCCTTCCATGGCTAACGGCGGCG…	SPSASVEQTLLDQLSMQFNGKSPSPTVHASTAAAAGSSEDDTSANSSISKCSNCSTIKTTAWRRDLEGKLVCNACGLYYRLHRTHRPVHMRKDFIQQRFRRRMREDENPATSQAAVFSQLLGLPSMANGGANALT	GATA
UT245-97	pTH10708	T13F3.2	ggcgcgccATGGTTGCGTCTTCTTTCCAGCACCACCTGGAACCGATGCTGACCCAGCCGATCCCGTGCCAGATCTGCACCTACCAGTCTCACGGTGTTAACTTCAACGTCATGACCTGCCGTGCGTGCGCAGCTTTCTTCCGTCGTTCTCTGGTATGCGGTATGCGTTACCACTGCAAAACCCGTAAAAACGACTGTCGTATCGATAGCACCGAACGTCATTTCTGTCGCCTGTGTCGCTTCCAGAAATGTCTGCAGATGGGTATGAAAGCTGAAAAAATCCAACAAAACCGCGATCCGATCAGCAGCACTTTTCCGGGCACTTCCACTGAACCAGAACTGTCCGAAATTGTGGACCCTGAAAATGAGAAATCCTACATTTTTCATGGCACGCTGTATG…	MVASSFQHHLEPMLTQPIPCQICTYQSHGVNFNVMTCRACAAFFRRSLVCGMRYHCKTRKNDCRIDSTERHFCRLCRFQKCLQMGMKAEKIQQNRDPISSTFPGTSTEPELSEIVDPENEKSYIFHGTLYGFKSLLAE	zf-C4
UT245-96	pTH10709	Y69A2AR.26	ggcgcgccATGTCTTCTCTGGGTTCTACCACCTCTTCTTCTACCCCGTCTAGCCAGACCAGCGAACTGTGCGCGGTTTGCGGTGGTAAAGCGAGCAGCAGCCGTTACGGTGCGCTGAGCTGCATCGGTTGCCTGGTCTTCTTCCGTCGTATGACCTGCGGCGAAAAAAAATGGTACTGCCTGCGTAACCGTAACTGCGAAATCAACATCGCAACCCGTAACACTTGTCGTGCATGTCGTCTGCAGAAATGTCTGAACGTAGGCATGAACCCGAACGCTATTCAGCGCCGCGACGAAATTGGCCCACGCAAACCTAAAGTGTCCAAGCACCGCCTGACTTGTGCTCAGAACTTCTCCTTCTCCGGCGAAACTCAGAACAATTTTTCCCAGAAGCAATATA…	MSSLGSTTSSSTPSSQTSELCAVCGGKASSSRYGALSCIGCLVFFRRMTCGEKKWYCLRNRNCEINIATRNTCRACRLQKCLNVGMNPNAIQRRDEIGPRKPKVSKHRLTCAQNFSFSGETQNNFSQKQYNAATSSEC	zf-C4
UT245-95	pTH10710	Y69H2.8	ggcgcgccATGTCTTCTGATCTGCCGGCGGCGCCGTCTGACCTGCCGTCTACCTCTTCTAACCTGCTGTGCACCGTTTGCGGTGCGCCGGCGTCTGGTCGTCGTTACGGTGCGGCAGCAGCATGCCTGGCCTGCATCGTTTTCTTCCGTCGTAGCGTCCTGCGTAAAATCCACTACACCTGCCAGGCCCTGGGTCGTTGCGAAATCACTGTAGCTAGCCGTTGCGTGTGTCGTTATTGTCGTATGCAGAAATGTCTGGCTGCTGGCATGGACCCGCGTGCTATCCAGATTCGCGACCTGCTGGGCCCACGCAGCCTGAGCAGCCGCCTGTCCTCCCGCCGCAACCTGGACTTCTCCCCTATTCTGGATCTGACTGATTTTCTGTCCCTGCAGCGCACGC…	MSSDLPAAPSDLPSTSSNLLCTVCGAPASGRRYGAAAACLACIVFFRRSVLRKIHYTCQALGRCEITVASRCVCRYCRMQKCLAAGMDPRAIQIRDLLGPRSLSSRLSSRRNLDFSPILDLTDFLSLQRTQCSSGNQKC	zf-C4
UT245-93	pTH10711	ZK218.6	ggcgcgccATGAAATCTATCCAGTGCCAGCCGCTGTCTATCTCTATGTCTTCTCCGTCTGTTCTGTTCGAAGCGTGCGCGGTATGCGGTGGTCCGCCGAGCAGCCGTCGTTTCGGTGCACTGGCATGCTTCCGTTGCAACGTGTTCTTCCGTAACATGCTGCTGAACAAACGTAACATCCGTTGCAGCAAAAACCCGGAATGCGAAATCGGTATCAAAACCCGTTACGCTTGTCAGGGCTGTCGCTTCAAAAAATGTCTGAAAAGCGGCATGGACCCGAAAGCTCTGAAACACCGCGACAAAATTGGCCCGCGCTCCCCAAAAATGAAATCCAACAAACCACAGTTTCAGTCCGCCGAGATTGATTTTCGCTGTCTGCTGGATCTGCAGAAGTCCCAAA…	MKSIQCQPLSISMSSPSVLFEACAVCGGPPSSRRFGALACFRCNVFFRNMLLNKRNIRCSKNPECEIGIKTRYACQGCRFKKCLKSGMDPKALKHRDKIGPRSPKMKSNKPQFQSAEIDFRCLLDLQKSQKSKHQYYNKP	zf-C4
UT245-92	pTH10712	Y17D7A.1	ggcgcgccATGGACCTGATCGCGTCTACCTCTATCCTGTCTCAGGAAGAAAGCAGCGAACTGATCTGCGCGGTTTGCAGCCAGCCGGCGCGTGGTCGTCACTTCGGTGCGGTTGCATGCCGTGCATGCGCAGCCTTCTTCCGTCGTGCCGACGCTGCTAAAACCACCGTTAAACCGTGCAAAAAAGGTGGTAACTGCCAGAACCTGCTGAACAACAACGGCTGGTTCGACTGCAAATTCTGTCGTCTGCAGAAATGTTACGAAATCGGCATGAACTCCGCTAACTTCCAATTTGACCGCGACCCGATCTCCACTAAGCTGACTAATGTCCCGAATTCCATGGAAGGCTTTCTGGGCCGCCCACATTGTGTAATTTTTGTAGATCCTGAGGTGGTGCGCT…	MDLIASTSILSQEESSELICAVCSQPARGRHFGAVACRACAAFFRRADAAKTTVKPCKKGGNCQNLLNNNGWFDCKFCRLQKCYEIGMNSANFQFDRDPISTKLTNVPNSMEGFLGRPHCVIFVDPEVVRCEKDLIDCTD	zf-C4
UT245-88	pTH10713	K12H6.1	ggcgcgccATGGCGGCGTCTATCTCTCGTAAATCTTCTCTGTCTCAGATCGCGAGCCACAGCGGTGGTAGCGACACCTGCAAAGTCTGCGGTGACGGTAACGCAAAAACCCACTACGGTGTTGTTACCTGCTTCGGTTGCAAAGGCTTCTTCCGTCGTACCCTGAAACGTCCGTCCGAATACACTTGCCGTCACAACGGCCACTGTGTTGTTGACCGTCATGAACGTAATTCCTGTCGTTTCTGTCGTTTTAAAAAATGTATTGAAGTAGGCATGGACCCGAAAGCAGTACGTCCAGACCGTGATGCTACTGGCCGCCATTATCAGGGCCGCCAGCGCCGCTCCAAGCTGTCCGCTGAAGATGAAGGCGAGGTGGATGCCGAGTGGATGCGCAAGCTGC…	MAASISRKSSLSQIASHSGGSDTCKVCGDGNAKTHYGVVTCFGCKGFFRRTLKRPSEYTCRHNGHCVVDRHERNSCRFCRFKKCIEVGMDPKAVRPDRDATGRHYQGRQRRSKLSAEDEGEVDAEWMRKLPVDMRTTLMQL	zf-C4
UT245-84	pTH10714	F44E7.8	ggcgcgccATGTCTCCGCCGGCGTTCATCGAACAGTCTCGTATGTCTGTTGACCAGCCGTCTAGCTCCTCTTCTGACTCTGAATGCCGTGTTTGCGCGCACACCGCGCACGGTGTTCATTTCGGTGTCCTGAGCTGCCGTGCATGCGCAGCATTCTTTCGTCGTAGCGTAGTAATGGACAAAAAATACAGCTGCCGTAAAGCCAGCCAGGGTTGCCGTATCGACAAAAGCGAACGTTACCTGTGTCGTCTGTGTCGCTACAAAAAATGTCTGCAGCTGGGCATGACCGCCGACAACGTGCAGTGGAATCGCGACATGATTTCCTCCACTGACCGCAAACGCCAATCTGAAGAGGACGATGCTACGGATGTGGATGCTTATTCCGATTGGTCCCCGGGCT…	MSPPAFIEQSRMSVDQPSSSSSDSECRVCAHTAHGVHFGVLSCRACAAFFRRSVVMDKKYSCRKASQGCRIDKSERYLCRLCRYKKCLQLGMTADNVQWNRDMISSTDRKRQSEEDDATDVDAYSDWSPGSKKSCLDAPPLYDL	zf-C4
UT245-82	pTH10715	C40D2.4	ggcgcgccATGGTTCGTATCATCGTTGACCACTCTCTGATCCTGCTGTACTCTCTGTCTGCGTTCGAAGAATCTAAATACATCTCTTCTGAAGAACAGATGCAGATCTCTGAATATATCAACGTTGACGACAAAATCATCCAGCGTTGGTTCGAAATCCGTCGTGCGCCGACCCAGGAAAGCTGGGAACCGGAAGTCATTCTGCCGGAAGCGATTGCAATTTTCGAAAAAGAATTCACCACCAACCCAAACCCTTGCAGCCACACTCTGGAAGAACTGCGTATGAAAACTCATGTACAGGTGGACAGCATTAACAAATGGTTTGACGAGCGCCGCTGCGCAGCTGAGCAAAATATTAAAAGCGATAGCGAGGGTTCCGAGGCTTCCTTTTCCCTGTGTT…	MVRIIVDHSLILLYSLSAFEESKYISSEEQMQISEYINVDDKIIQRWFEIRRAPTQESWEPEVILPEAIAIFEKEFTTNPNPCSHTLEELRMKTHVQVDSINKWFDERRCAAEQNIKSDSEGSEASFSLCSSWGDTDKELKVDLKMA	Homeobox
UT245-81	pTH10716	C37E2.5	ggcgcgccATGACCTCTTACTCTTACTTCACCATCCCGTCTACCGCAACCACCGGTTTCAACTACCCGGTTCAGCCGATGACCATGTTCTCTGGTGCGCCGTACAACGCAGCGATGATCCCGCGTAAAAACCGTCGTGAACGTACTACTTACTCTCGTCAGCAGCTGGAAATCCTGGAAACTCTGTTCAACGAAACGCAGTATCCGGACGTTTTTGCCCGTGAACGTGTCGCTGACCAGATCCGTCTGCAGGAAAGCCGTATTCAGGTATGGTTTAAAAACCGCCGCGCTAAATATCGCCTGCAAGAAAAACAGAAACCGAAACGCAGCAATGAAAAAAGCCAGGAACACAAATCCGAAGACCAGCAGCAGACGGATGTGCTGGATGGTGAGCCACTGA…	MTSYSYFTIPSTATTGFNYPVQPMTMFSGAPYNAAMIPRKNRRERTTYSRQQLEILETLFNETQYPDVFARERVADQIRLQESRIQVWFKNRRAKYRLQEKQKPKRSNEKSQEHKSEDQQQTDVLDGEPLKGGSPGYQPQIKSELESC	Homeobox
UT245-79	pTH10717	ZK867.1	ggcgcgccATGTCTGTTTGCGTTTCTCCGCTGGTTCAGGCGACCATCCTGATGACCGAAGAATCTCTGACCTGCCCGCAGTGCCCGAAATCTTTCTCTTCTACCAAACTGCTGCAACAGCACCAGCAGATGTTCCACACCGACAAAGCGTTCATCTGCGAAACCTGTGGTAAAGCGTTCCGTTTTCGTAGCAACCTGGCAGAACACCGTAGCGTTCACACCGCACTGAAACCGTACGTCTGTAAATTTTGTGGTAAAAGCAGCCGCCTGAAAGGTAACCTGACCAAACACATCCTGAAACATCATAAAAAAGAACAGAACGAGGCTATCGCTAAAGACGATATCATTGTAAAGAAGGCTCCGAAGATTGTAACCAAGGATAACGGCCCGACTACTAATG…	MSVCVSPLVQATILMTEESLTCPQCPKSFSSTKLLQQHQQMFHTDKAFICETCGKAFRFRSNLAEHRSVHTALKPYVCKFCGKSSRLKGNLTKHILKHHKKEQNEAIAKDDIIVKKAPKIVTKDNGPTTNGSTPTTSTATPSVITVSSA	zf-C2H2
UT245-76	pTH10718	R53.3	ggcgcgccCAGGCGCTGAACTCTACCTTCCTGGGTATGCTGCAGCGTTCTCTGAACTACAACCCGGCGGTTCCGTCTCCGCACTCTTTCCTGCGTGCAATGTCTGGTGCTAAAGCTTCTTCTTCTCCGTCTAGCAGCAGCGGTAGCGGCAAAGACCGTTACACCTGCAAATTCTGCCAGAAAGTTTTCCCGCGTAGCGCCAACCTGACCCGTCACCTGCGTACCCACACCGGCGAACAGCCGTACAAATGTCAGTATTGTGAGCGTAGCTTTAGCATCTCCTCCAACCTGCAGCGCCACGTTCGCAACATTCACAACAAACCGAACACCTCCCTGACCCCGCACAATCACCACCGCCAACGCTCCCTGCATAATTCCACCTCCACTTCCACTACTACTA…	QALNSTFLGMLQRSLNYNPAVPSPHSFLRAMSGAKASSSPSSSSGSGKDRYTCKFCQKVFPRSANLTRHLRTHTGEQPYKCQYCERSFSISSNLQRHVRNIHNKPNTSLTPHNHHRQRSLHNSTSTSTTTTTVHHPLLHLPGTSVPVPKV	zf-C2H2
UT245-72	pTH10719	Y60A3A.25	ggcgcgccCTGTGGAACATGGAAACCGGTCCGGGCCAGGTTTTCGAAGCGCCGGTTCTGCCGGCGATCCCATGGAACAACGACGATAACTTCAACGACAACTTCACCGAAGACGACGCGATCTCTCAGATCTCTTTCGACTCTGAAATCAAATCTGAAACCGACAGCATGGTTAGCCGTAAACGTAAACGTAACCGTGAAGACGCACAGAACAGCTACGATAAAAAAAAACGTATCCGTGATGAAAACGAAACCTTCTTCAAATCCCAGAAACTGACTCACGAAAACCTGCTGAACCAGAACATCCTGAATGAAGCACATTTCCGTACTGCTGTCAAACTGGTACTGCGCCCTTGCTTTTCCAATCTGCGCATCATTAAGGTGTACTATACTAATTGCT…	LWNMETGPGQVFEAPVLPAIPWNNDDNFNDNFTEDDAISQISFDSEIKSETDSMVSRKRKRNREDAQNSYDKKKRIRDENETFFKSQKLTHENLLNQNILNEAHFRTAVKLVLRPCFSNLRIIKVYYTNCSSEQVFRCLADFERDKADIITE	bZIP_1
UT245-71	pTH10720	Y56A3A.28	ggcgcgccCTGTCTTTCATCCCGTCTGGTACCGTTGTTGGTGCGCCGGCGAACCAGGACGACGGTTCTAAACCGAAAATGGAATGCCCGACCTGCGGTCTGGTTCTGTACCGTCACAACTTCGCGGCACACTTCCGTATCCACACCGGTGAACAGCCTTACGGCTGCGACTACTGCGGCAAACGTTTTCGTACCACCTCTAGCCTGAAAGTTCACAAACGTGCACACACCGGCGAAAAACCGTACGTTTGTCCGAGCTGTGATTACCGTACCATCACTAAACGTAACCTGGATCGTCACATCGTCAACCATCATATCCGTAACGCTGTCATCAAAGGCCCGATTATGCGTCGCAGCCGCACTATTCCACGCTATCATCCAGAAGATCAAGTAGAATCCA…	LSFIPSGTVVGAPANQDDGSKPKMECPTCGLVLYRHNFAAHFRIHTGEQPYGCDYCGKRFRTTSSLKVHKRAHTGEKPYVCPSCDYRTITKRNLDRHIVNHHIRNAVIKGPIMRRSRTIPRYHPEDQVESIPTTMKYTVNEKSVRVSVAATR	zf-C2H2
UT245-70	pTH10721	ZK287.6	ggcgcgccATCCAGTCTTCTTCTCCGGTTGTTTTCGTTGACAACGCGTACCACGCGTTCCTGGACGAAACCCTGGCACGTCACGAAGAAGAACGTGGTGCAGGTCCGTCTTTCGAAGGTGCTAGCGACGGTGGTGGTCCGATCAAACCGAAACAGCAGATCCAGTGCAGCCTGTGCGGCGACGTCGTAAGCAAACAGCGTTCCTCCATGGTATACCACGCTAACACCCGTCACGGCAAATACGAACTGTACGAATGCGGCATCTGCCACCGTAAATGGCAAACCATCGCCAAATCCGACGTGATCAAACACATCAAATCCCATCATGAACGTCCGGATGGCACTATTGATTGTGATATGGTGATTGATTATCGCAAAAACCTGGGCAATAAACTGAAAG…	IQSSSPVVFVDNAYHAFLDETLARHEEERGAGPSFEGASDGGGPIKPKQQIQCSLCGDVVSKQRSSMVYHANTRHGKYELYECGICHRKWQTIAKSDVIKHIKSHHERPDGTIDCDMVIDYRKNLGNKLKEITEKCFPERKKKRIGYTDLPE	zf-C2H2
UT245-68	pTH10722	Y94H6A.11	ggcgcgccAATAACCAACAGGCTCCTCGTGGCGGTACTAACGGTACTTCTTCTTCTTCTACTACCGCAACTACCACCACCAGCACCAAGAAGAAAAAGGGTCAGGGTCCGGGTCGTCGCCCGGCCCTGGATGCGAACGGCATGCCGAAAGAACGCCCGTTTGTTTGCCCGCGTCCGGACTGCCAGAAACGCTTCTGCCGTAACGATCACCTGCAGCGTCATATGCGTATCCACACCGGTCAACGTCTGTTCCAGTGCCGTACCTGTCTGCGCAGCTTCAGCCGTTCCGATCACCTGGCAAAACATGAACGTACGCACTCCGCTGACAAACCATACTCCTGTCTGACGTGCGCGCGCCGTTTCCACAAACATGAAGAAAAAAAAAAACACGAAGAGAAAT…	NNQQAPRGGTNGTSSSSTTATTTTSTKKKKGQGPGRRPALDANGMPKERPFVCPRPDCQKRFCRNDHLQRHMRIHTGQRLFQCRTCLRSFSRSDHLAKHERTHSADKPYSCLTCARRFHKHEEKKKHEEKCQHKVEDQQQGGAGRQQLNLMGN	zf-C2H2
UT245-67	pTH10723	W02H5.4	ggcgcgccCTGCCTATTTCTCTGGCTCCGTTTTTTGCTGCTCGTCTGGCTGCGATCTTCCGCATCGTCTTCTTCCTGATCTTCAGCAGCTTCTTCTCCTTTTTCGAACGTTTCCAGGTGATCATGCCGTCCAACCCGACCCTGTCTAACACCCCGAAGGGCAGCAAAAAGAACCACTCTATGAAATTCAAACTGGAAGCGATTCAGTACGCAAAGAAATATACTAAAGCGAAAGCAGCACGCGATCTGAATGTTTCTCGTCAGAACATCCAACAGTGGGTGGCGCAGGAAGAACAGATCTCTGCCCAGCTGCGTAACCCAGACGTTAAAGCAACGAAGCGCCTGCAAGGTGGCGGTCGTGCGCTGAAATTTAAAGATCTGGATGACGAGATGATTTCCT…	LPISLAPFFAARLAAIFRIVFFLIFSSFFSFFERFQVIMPSNPTLSNTPKGSKKNHSMKFKLEAIQYAKKYTKAKAARDLNVSRQNIQQWVAQEEQISAQLRNPDVKATKRLQGGGRALKFKDLDDEMISWFHDQRKQKFRVSRFLIRQKAKE	BrkDBD
UT245-63	pTH10724	F59H6.6	ggcgcgccATGAAAGAACTGGCTGCACAAATCAACGTGGATCTGCAATATGTCAATTTTTGGTTTGCGCAGCGTCGCGTTGCATCCACCCGTGATAACGGTCGTAAATACGAGCTGTTCTCTGGTAAAAAGAACCGCCAGCAGTGCGCTTTCTGTGCGTCCGCATGCTTCGATTCTATCCCGCTGCTGAAACAAAAATTTCCGTACGCTGACTTCCCGATGCCACAGATTCAGCTGTCCGATCACGAACAGCAGAGCAAAGAGAACTTCATCCCTGGCGAAGCGATTGAAAACTGGTTCTCTGACCGTCGTCTGGCCGTACAGGAAGACGCCCTGATGCGCTCTGAACTGCTGCTGAATATCATCCGTTACAAAATGCTGCAGTTCAACTCCTTCCAGT…	MKELAAQINVDLQYVNFWFAQRRVASTRDNGRKYELFSGKKNRQQCAFCASACFDSIPLLKQKFPYADFPMPQIQLSDHEQQSKENFIPGEAIENWFSDRRLAVQEDALMRSELLLNIIRYKMLQFNSFQFQDLKLLNFSKKNSKLLLFLCFTK	Homeobox
UT245-62	pTH10725	Y50E8A.12	ggcgcgccATGCTGTCTGAAGCTAGCTCTGTCCAGTCTCCTACCGTTTCTATCCGTCGCCGTACCTGCGTTGTGTGTGGTTCTTCCACCCTGAACTCCTACGTTACCTCCTTCACTCGCGTGCCGGACAAACAGGAGCAGTGGGTCACCGTACTGGCGAACGGTGACGCAGGTTTTGAAGACCAACTGAAAGCCAGCCTGGCGACGGGTCGCAAATATATCTGCTACGACCACTTCGACCGTCAGTACTTCGCACAGCGCAAAACCGACGACGGTTTTGAACTGATTCGTAATCGTAACCCGATGGCTTTCAAGAACGCTACTTTTATCCGCCACGTTGATCTGCGTTCCACCAGCTCCTTCGTCCCGGACGACTCCTCCGAGGAACCAATTCCGGCCA…	MLSEASSVQSPTVSIRRRTCVVCGSSTLNSYVTSFTRVPDKQEQWVTVLANGDAGFEDQLKASLATGRKYICYDHFDRQYFAQRKTDDGFELIRNRNPMAFKNATFIRHVDLRSTSSFVPDDSSEEPIPAKRLKIMSDLKGRGGELDPNSMTFLM	THAP
UT245-58	pTH10726	C56E10.1	ggcgcgccTTCATGATCTCTTGGAACGGTCTGGGTGAATTCCCTGACACGGAGGAGGATATTAAACATGTTATTCAGCCAACCGAAAACCTGTCTCTGAACATTGAAGAACAGAAAGAAATCGTTGCTTTTCACCACCTGCCGCGTAACGTTTGTCCGACGATCTGTGCCGTCTGCGGCGATCGTGCGACTGGCTATCACTACGAAGTACCGTCTTGCAACGGTTGCAAAACCTTCTTTCGTCGTACCGTGCTGAGCCAGCGTAAATACGAATGTATGCGCGGTGGTAAATGCTTCAACGTTCTGCCGAAAGGCACTTGCTGTTTTAGCACCATCCGCACCTTCCCGGCGTTCGAACAGCTGATCGTGAACTACGCAATCCCGGTACGTATTAGCGACT…	FMISWNGLGEFPDTEEDIKHVIQPTENLSLNIEEQKEIVAFHHLPRNVCPTICAVCGDRATGYHYEVPSCNGCKTFFRRTVLSQRKYECMRGGKCFNVLPKGTCCFSTIRTFPAFEQLIVNYAIPVRISDSGDGKLSVIRITSQKSLIMTIIWSNQ	zf-C4
UT245-54	pTH10727	Y41D4B.12	ggcgcgccATGTGTCTGCATACTGCTCCAAACTTCATTACCTGCGAAATGGCTAAAGGCTTCGGCGTGCGCGCTGGCGAACAGATCGCCGCAGGCGAATTTGTATGCGAATATGCGGGCGAATGCATCGGCGAGCAAGAAGTTGAACGTCGTTGCCGTGAATTCCGTGGTGACGACAACTACACCCTGACGCTGAAAGAGTTCTTCGGTGGCAAACCTGTGAAAACCTTCGTTGACCCGCGCCTGCGCGGTAACATCGGTCGTTTTCTGAATCACTCTTGTGAGCCGAACTGCGAGATCATCCTGGCGCGTCTGGGTCGTATGATTCCGGCAGCCGGTATCTTTGCGAAACGTGATATCGTCCGTGGTGAAGAACTGTGTTATGATTACGGTCACTCTG…	MCLHTAPNFITCEMAKGFGVRAGEQIAAGEFVCEYAGECIGEQEVERRCREFRGDDNYTLTLKEFFGGKPVKTFVDPRLRGNIGRFLNHSCEPNCEIILARLGRMIPAAGIFAKRDIVRGEELCYDYGHSAIEGENRKLCLCKSEKCRKYLPMSATPIE	zf-C4
UT245-53	pTH10728	T04D1.4	ggcgcgccCTGGATAACTTTGACGCAATCCGTGTTGACGAAAACCTGTGCTTTGCTGAGAAAAACCTGGCAGTGTGGCCGGGCCAAACCGACTTCTGGCTGCGCTTCCGCCGCCTGCTGACCTCTAGCCAGAAATCTGTACACGACCCGGTGTACAACAAACTGAACTGGACTAAACGTGAGGAACAGGAATTCATTCGTGTGGTTCGTTCTTATGGTGTTAAAACCAACATCGGCGAAGGCGGTAACGAAGATTGGACCATCTTCAAGACCCTGTCCCCGATCCTGGAAAAGAAAACTGACGAAGATTGTCACGAACAGCTGATGTGTGTTCTGGCCATGTGCCAGCGCGCTCAGGGTTCCAATGACCTGAAGCCAATTGATCTGAAACGTGCGATGA…	LDNFDAIRVDENLCFAEKNLAVWPGQTDFWLRFRRLLTSSQKSVHDPVYNKLNWTKREEQEFIRVVRSYGVKTNIGEGGNEDWTIFKTLSPILEKKTDEDCHEQLMCVLAMCQRAQGSNDLKPIDLKRAMSIDPMPTRKAIKMMNRISLMRKVHTMVQT	Myb_DNA-binding
UT245-52	pTH10729	F56H1.2	ggcgcgccTATACCAACTTCGTGAAAACCCCGTCTGATATGGTGGATCTGCAAGAAGAATTCCTGCGTTTCCTGGAGTCCAAAGAAGAATCCATCGACTGGGCGTACGTAGGTGGCGCAGCTGCAATCGTTGTTTTCATCCTGCTGACTTCTATTCTGGGTTATTGTATCGAACGCTGGACCATCTGTAACTCTTGCACCGAAGCGTTTTTCGATGTCGTGCGCAATGAGAAAGAACTGAAATGTCAGCGTAAAGGTTTTTGTCGTAAAGACGTTAAAGAATGGAAGAAATGCGAAGCTTGCCGTTACCAGCAGTGCCTGGAGATTGGCATGACCCTGGAGCGCTGCGGCTGCATCCTGCGTCCGACTTTCGACTCCGAATGGCTGAAGAAAACTAACG…	YTNFVKTPSDMVDLQEEFLRFLESKEESIDWAYVGGAAAIVVFILLTSILGYCIERWTICNSCTEAFFDVVRNEKELKCQRKGFCRKDVKEWKKCEACRYQQCLEIGMTLERCGCILRPTFDSEWLKKTNERVYNNYSHFVFNRPEITYPDCNAISALCP	zf-C4
UT245-51	pTH10730	C37E2.4	ggcgcgccTATACTGCATTCCCGACTCTGGGTTACACCGCATATCCACAATTTGCGTTCGCCGCTGCGACCACCGCACCGAGCCTGACCTCTGCTACTACTTCCAGCACTACCATGGCACCGATGGCGCCGAATTCCGAATCTGGCCGCCGTGCGGGCCGTCGTGAGCGTACGTCCTTCAACCGTGGTCAGCTGGATCAGCTGGAAAAAGTATTTCGTGAAACCCAGTACCCTGATGTGCACCGCCGCGAAGCGCTGGCCAAAGCTATCAACCTGCCGGATGGCCGTGTGCAGGTTATCACCGTTTGGTTCAAAAACCGTCGTGCTAAAGACCGCAACAACAAGAAAATGGACGGTGTCCACCCGGGTTCCACCTCTTCCCGCAGCTCTAACGGTAGCC…	YTAFPTLGYTAYPQFAFAAATTAPSLTSATTSSTTMAPMAPNSESGRRAGRRERTSFNRGQLDQLEKVFRETQYPDVHRREALAKAINLPDGRVQVITVWFKNRRAKDRNNKKMDGVHPGSTSSRSSNGSPHNESKPDTKSLGIHIPGTPEFNAHSAAKY	Homeobox
UT245-151	pTH10731	F21D5.9	ggcgcgccGTTCCGCTGCCGCGTGTTCAGCAGCCGCGTGCGACCACCTCTACCTCTAGCAGCTCTTCTACCAGCTCTAGCTCTGGTGTTACTGTTCCATCCACTATGAACAACCCTCTGGTCGCGAACGCACTGGGTTCCTCCCTGGTAAACGAAAACTGCTGCGCCGTATGTGGCGCTGTGTTCCGTCTGACGGGCGACCTGGTGCAGCACATGCGTAACAATCATCGTAAATCCAAATTTAAACGCAAGTCCGATCTGCGCCAAacctgcagg	VPLPRVQQPRATTSTSSSSSTSSSSGVTVPSTMNNPLVANALGSSLVNENCCAVCGAVFRLTGDLVQHMRNNHRKSKFKRKSDLRQ	zf-C2H2
UT245-154	pTH10732	F15A4.10	ggcgcgccATGTCTGCGCAGCTGCAGAAAATCATCGCGGACAACTCTGAACTGATCCAGGAAAAAAGCAAAAAAAGCGACCAGGACGAACTGGGTAAACGTATTGACGCACTGCTGTGGGAAGTTGACACCCTGCAGAAAAACATTGCAGAAACTAAAGAAATGTGCCGTCGTTGGGGCGATGAACGCAAGCGCGAGGCTGCTGAGTTCGCCAAGCTGCTGGATTCCTCCGATGATGATCAAAATacctgcagg	MSAQLQKIIADNSELIQEKSKKSDQDELGKRIDALLWEVDTLQKNIAETKEMCRRWGDERKREAAEFAKLLDSSDDDQN	bZIP_1
UT245-149	pTH10765	T26E4.8	ggcgcgccATGTTCTTCCGTCGTCAGGCGATCCGTAAATGCGCGCTGCGTCCGTGCTCTGGTGGTGAAGCATGCTACCGTGACACCCCGCTGATCCTGGGTTGCCAGTTCTGTCGCTTCCAGAAATGTATCGAAGTTGGCATGAACATCAAAGCTCTGCTGCAGAAAACCTCTCTGGAAAGCCTGATCAACTTCATCTCCGACGTCGATTTCGAACGCTGTATTACTTTTCTGAACTTTTACCCAAAGCAAGCCGGCTACACGATTTGGAACGTAGTGGAGAATTTTCCTATTGAATATacctgcagg	MFFRRQAIRKCALRPCSGGEACYRDTPLILGCQFCRFQKCIEVGMNIKALLQKTSLESLINFISDVDFERCITFLNFYPKQAGYTIWNVVENFPIEY	zf-C4
UT245-145	pTH10766	Y105C5B.29	ggcgcgccATGGAAAAAATGTCTTCTGACCTGACCTTCGCGGAACCGGGTGTTCGTCTGTCTATCAACCTGCGTGAACGTTGCCGTATGCACGACCTGAACGAAGCGCTGGACGATCTGCGTGCGGTTATCCCATACGCACACGGTGGTTCTGTCCGCAAACTGTCTAAAATCGCAACCCTGCTGCTGGCTAAAAACCATATCATTATGCAGGCTAAAGCCATTGAAGAACTGAGCGTACTGGTGAGCCAACTGAAAACCCGCAAGTCCAGCGGCAACTCCGAAAATCTGGAGAAGACTGTGTCCACGCCTTCCGAGGGCGATacctgcagg	MEKMSSDLTFAEPGVRLSINLRERCRMHDLNEALDDLRAVIPYAHGGSVRKLSKIATLLLAKNHIIMQAKAIEELSVLVSQLKTRKSSGNSENLEKTVSTPSEGD	HLH
UT245-144	pTH10767	W10D5.1	ggcgcgccATGGGTCGTAAAAAAATCCAGATCACCCGTATCCAGGACGAACGTAACCGTCAGGTTACCTTCACCAAACGTAAATTCGGTCTGATGAAAAAAGCGTACGAACTGTCTGTCCTGTGCGACTGTGAAATCGCACTGATTGTATTCAACTCTACCAACAAACTGTTTCAGTACGCTTCTACTGACATGGACAAAGTGCTGCTGAAGTACACTGAATATAACGAACCGCACGAAAGCCGCACTAACAACGATATTATGGAAGCCCTGAACCGCAAGGAGGGTAATCAAGGTGGCGGCAATAGCGATGATGAGTCCCCAGGCCCTTCCACGacctgcagg	MGRKKIQITRIQDERNRQVTFTKRKFGLMKKAYELSVLCDCEIALIVFNSTNKLFQYASTDMDKVLLKYTEYNEPHESRTNNDIMEALNRKEGNQGGGNSDDESPGPST	SRF-TF
UT245-142	pTH10768	K04C2.6	ggcgcgccTCTTCTCTGAACATCTCTCCGACCACCGGTTCTCCGAACTCTTCTCACTTCACCACCTTCACCCATTTCTCTACCCCGTCTACCAGCCCGAGCACCAGCACTCAGAGCAGCACTCCGCCAAGCAACTCCGACAACAAAAAATCCTTCCAGTGCTCCAACTGCTCCGTTACTGAAACTATCCGTTGGCGTAACATCCGTTCCAAAGAAGGTATTCAGTGTAACGCGTGTTTTATTTACCAGCGTAAATACAACGAAACTCGCCCTGTTACGGCTGTCAATAAATATCAGAAACGCAAGCTGAAGGTACAAGAGACGAATGGCGTGGATTCCTCCacctgcagg	SSLNISPTTGSPNSSHFTTFTHFSTPSTSPSTSTQSSTPPSNSDNKKSFQCSNCSVTETIRWRNIRSKEGIQCNACFIYQRKYNETRPVTAVNKYQKRKLKVQETNGVDSS	GATA
UT245-138Y48G1C	pTH10769	Y48G1C.6	ggcgcgccATGTCTGAAATCCCGACCGAAGTTCCAGTTAAAACCCGTAAACGTACCTACGACCTGAAATTCAAACTGCACGCGATCAACTACGCGCTGGAACACAAAAACATCTCTAAAGCGGCAAAAGACCTGAACGTCAACCGTCAGAACATCCAGCAGTGGATCGCACAGAAAGCTGAAATCGAAAAACAGCTGGAAGACAATGGTAGCACCGCTACTAAACGTCTGTCCGGTGGTGGCCGTCCTCTGAAATATGACGATGTAGATAAAGAACTGATTAAGTGGGTGCATGATCAGCGTAAGGAGAAGCAACGCGTGACTCGCCGCATTATTGGCGAGACGGCCacctgcagg	MSEIPTEVPVKTRKRTYDLKFKLHAINYALEHKNISKAAKDLNVNRQNIQQWIAQKAEIEKQLEDNGSTATKRLSGGGRPLKYDDVDKELIKWVHDQRKEKQRVTRRIIGETA	CENP-B_N
UT245-135	pTH10770	F57A10.6	ggcgcgccATGTGCTCTATCTGCAACGTTCGTGAATCTTCTGGTTTCAGCTACGGTGTCCTGTGCTGCGGTGCGTGCAAAATGTTCTTCCGTCGTGCGCTGTTCGTAAAAAACATCGACACCTGCCGTCAGAAAGGCGAATGCATCAAAAAATGTCGTTACTGTCGCTTCCAGAAATGTATCCAGGCAGGCATGAGCTACACCCCGACTGAAAACCTGCTGGAACTGAAGAACAACGACTCCCTGTCCGCATTTATTTTTAACCTGGCTCACCAGGACGAACTGCGCAAGTATCAACTGATGAATTGTCGCTATGATGGCGATCCAACGGTGGCTGAGATTGCCGAGCATacctgcagg	MCSICNVRESSGFSYGVLCCGACKMFFRRALFVKNIDTCRQKGECIKKCRYCRFQKCIQAGMSYTPTENLLELKNNDSLSAFIFNLAHQDELRKYQLMNCRYDGDPTVAEIAEH	zf-C4
UT245-133C50H2	pTH10771	C50H2.6	ggcgcgccATGATCAAATGCGCGCACAACCAGATCTCTATGGACAACGCGTTCCTGGCGCTGGGTCTGGTTCCGCCACTGCCTGCAACCTTCTGCTCTGCAGCTTCTATCGACAACAACGCTGTCAAATCTTGCAAAAACAAAAGCACCACCCTGCACGCTAAAATCCTGCTGAGCAAAGAAGTACGTTTCCAGCTGACTATGAAATTCGAACGTAACTGTGGTGTGTTCAGCAAAGCCGAAATTCAGACTCTGGCCGAGAAATACAACATGACGTGTAAACAGATTAAACAATATTTTCGTAATCTGCGCTTTCGCTCCAAGGGCCATGATTCCATGAAGATGTCCTCCAAGacctgcagg	MIKCAHNQISMDNAFLALGLVPPLPATFCSAASIDNNAVKSCKNKSTTLHAKILLSKEVRFQLTMKFERNCGVFSKAEIQTLAEKYNMTCKQIKQYFRNLRFRSKGHDSMKMSSK	Homeobox
UT245-131	pTH10772	C07E3.5	ggcgcgccACCGATGATCAGGTACGTGAAGAATACTTCAACCGCCAACGTATGTACCCTCATGAGAAGAACGTGAAGAGCAAGGAGGCAGAAAACAACTACAGCTCCGAAGCTGATTCTGAGGACTCTCCAGAAGTAGTTCCGGTTCAACAGCAGAAACGTCGTCCGCGTCAGAATTTCTCTAATACTATCTCCAACGAACTGCGTATTGTGCAGGAACGTTTCCACGGTTCCGTTCCGAAAAAAGACGCGGAAGAAGTTGCCGAAAGCATGAACCTGGACAAAACGCGTGTCAACAACTGGTTTAAAAACAACCGCAAAAAATATATCCGCGACAAAAACAAACGCCTGCAGCTGCACacctgcagg	TDDQVREEYFNRQRMYPHEKNVKSKEAENNYSSEADSEDSPEVVPVQQQKRRPRQNFSNTISNELRIVQERFHGSVPKKDAEEVAESMNLDKTRVNNWFKNNRKKYIRDKNKRLQLH	Homeobox
UT245-126	pTH10773	Y37E11B.1	ggcgcgccGGTTCTTCTCAGAAAAAAACCCAGAAACTGTACTTCCTGCAGAAACTGTCTTTCCTGGACGCGGACTTCTTCTCTATCCTGGAACGTAACCTGCTGATCTTCGGTTACTTCGCAATCTTCTTCTCTCAGAAAAACACTTACATCAGCCGTTTCACGTGCCCGATGTGCTATGCTAGCTTCGACCTGAGCGATCCATTTAAAATTCACCTGCGTAAACACGATAACCTGAAACCTTTTGGTTGCTCCTATTGTTTTAAGCAGTTTTCCTCCCGTTCCGTTTGTCGTCGCCACGTGCAACTGATGCATGAGAACCAGAAGCGCGCCGGCGACGGCGACAATGACGACGATGATGATATTGATacctgcagg	GSSQKKTQKLYFLQKLSFLDADFFSILERNLLIFGYFAIFFSQKNTYISRFTCPMCYASFDLSDPFKIHLRKHDNLKPFGCSYCFKQFSSRSVCRRHVQLMHENQKRAGDGDNDDDDDID	zf-C2H2
UT245-123	pTH10774	T27B7.4	ggcgcgccATGAAAAAAGTTCTGTTCCCGTGCCAGATCTGCGGTCAGAACTCTCACGGTACCCACTTCGGTATCGTTTCTTGCCGTGCGTGCGCGGCATTCTTCCGTCGTTCTGTTAACTCTAAATGGGCACGTAAAGGTTGCCTGACCAACTTCAAAGACAAAGGCTCTTGTTTCTGTAAACCGTGTCGTCTGCGCAAATGTGTCGAAATCGGCATGGACGCCAGCAAATTCCAGTACGACCGCGATGCTATCAGCGCTATCAAGCATCCGAAGATTTTCCCAAGCGTATCCTACTATGTAGGCCGCCCTGAGTTTCTGATGTTTTCCGATTCCAACGTGACTTCCCAGAAGACGTTTATTGATGTGCAAAATacctgcagg	MKKVLFPCQICGQNSHGTHFGIVSCRACAAFFRRSVNSKWARKGCLTNFKDKGSCFCKPCRLRKCVEIGMDASKFQYDRDAISAIKHPKIFPSVSYYVGRPEFLMFSDSNVTSQKTFIDVQN	zf-C4
UT245-121	pTH10775	F17C11.17	ggcgcgccGGTCAGGAATACAAAGTTATCGTTGAACGTGTTGAAGGTTCTGAAGCACACGCGACCCCGGCGCTGACCAAACGTAAACTGTCTGACGACTCTGACATCGCGCCGAAACGTGCGCGTGCACCGCCAGTTAGCCTGGTCAACCTGAGCGATGAAGAAATCGCAGAACGTAAAAAACAGCAGAACCGTGCTGCTGCTCTGCGTTACCGTCAGAAACTGCGTGAAAGCCGTGTAATGTCCGTATCCGTGAAAGAAACTCTGACGCAACGCAACGCTTATCTGCGCGATGAAGCCGAGCGCCTGTCCAAAGAGTGCGAGGTGATTCGCCGCCTGATTTTCGATAAGCTGGGCAAGAATGCCCCTCTGTTTacctgcagg	GQEYKVIVERVEGSEAHATPALTKRKLSDDSDIAPKRARAPPVSLVNLSDEEIAERKKQQNRAAALRYRQKLRESRVMSVSVKETLTQRNAYLRDEAERLSKECEVIRRLIFDKLGKNAPLF	bZIP_1
UT245-117	pTH10776	ZK1025.9	ggcgcgccATGGACAACAAAAACGACCCGTGCCGTATCTGCAACGACTCTCTGACCTCTGGTTTCCACTTCGGTACCTCTTGCTGCATCGCGTGCGCGGCGTTCTTCCGTCGTACCGTTAAAAACCAGTTCACTTGCAACGCAAACAACGATTGCGTTATCTCTTTTGAAAAAAAATTTACTTGTCGTGCATGTCGTTACAACAACTGTCTGAAAGCTGGTATGCGCAAAGATTACATCCGCAAAATCAACTCTAATTATGTCCCGAAACAAAAGTGTGTAAATGTGGATGCTTCTCGCTCTATCGGCACGAGCAGCGCCAGCAGCAGCTCCTCCGAATCCTCCCCGCTGGTGTCCCCAATTATTGAGAAGCCTATTGGCacctgcagg	MDNKNDPCRICNDSLTSGFHFGTSCCIACAAFFRRTVKNQFTCNANNDCVISFEKKFTCRACRYNNCLKAGMRKDYIRKINSNYVPKQKCVNVDASRSIGTSSASSSSSESSPLVSPIIEKPIG	zf-C4
UT245-116	pTH10777	F10C1.5	ggcgcgccATGCCGGTTTCTCCGTCTTCTGTTAGCGTCCTGCCGCCGACCAGCCTGGAACAGATCCTGCGTATCCGTGCGGAACGTAACCAGCGTACCCCAAAATGCGCGCGTTGCCGTAACCACGGTACCACTAGCGCGCTGAAAGGTCACAAACGTTACTGCCAGTGGAAAGACTGCATGTGTGCGAAATGTACTCTGATCGCAGAACGTCAGCGTGTAATGGCAGCACAGGTGGCTCTGCGCCGCCAGCAATCCCAAGAAGAACGCGACGCTCGCGACCTGGAGGTGCTGCTGGGTTCCGCTGGCAACGCTAACGATCTGCTGGATATTCTGCGCCTGGATGCCGGCGAGCACCATGGCAAGAATCATGCCTCCCCTACGacctgcagg	MPVSPSSVSVLPPTSLEQILRIRAERNQRTPKCARCRNHGTTSALKGHKRYCQWKDCMCAKCTLIAERQRVMAAQVALRRQQSQEERDARDLEVLLGSAGNANDLLDILRLDAGEHHGKNHASPT	DM
UT245-114	pTH10778	E03H4.6	ggcgcgccATGACCATCATCCTGACCGACCCGGTTTGCCCGGTTTGCGAATTCCCATCTAACGTTGAACTGCACTTCGGTGGTCTGGTTTGCGGTGCGTGCGCGGCATTCTTCCGTCGTACCGTCTCTCTGAACATCCGTTACCTGTGCGAAAAAAAAAACCAGTGTAAAGGTAAACGTAAAAACTGTCGTGCTTGTCGTTTTGACTACTGTGTAAAAATTGCTGGCATGAAACGTAACCTGGTACGTCAGCGTAAAAACTCTACCAACACTCCTATGTATATTCTGAATCGCCGCAAAGATTCTGGCAATGAAGAGGTGGTGCGCGGCTTTGTGACTAGCACGCAGAGCAAGTGGGCCCAACATAGCCGCAAGTCCTCCATGTCCacctgcagg	MTIILTDPVCPVCEFPSNVELHFGGLVCGACAAFFRRTVSLNIRYLCEKKNQCKGKRKNCRACRFDYCVKIAGMKRNLVRQRKNSTNTPMYILNRRKDSGNEEVVRGFVTSTQSKWAQHSRKSSMS	zf-C4
UT245-113	pTH10779	F41B5.9	ggcgcgccATGCTGCTGTCTGAATGCGAAATCTGCGGTCAGCCGTCTCACGGTAACCACTTCGGTGTTATCTCTTGCCGTGCGTGCGCGGCATTCTTCCGTCGTGCTACCCTGAACTCTAAAAAAAAACTGAACCTGAACTGCTTCCATGACAACAACAGCGAAATCAACAAAAACGGTTTCTTCAGCTGTAAAAAATGTCGTCTGAAAAAATGTCTGGAAAAAGGCATGGACGCTAGCAAGTTTCAACTGGACCGCGATAAGATCACCAACGCCATCGTACCGGTGAACACCCCGGAAATTATTACTCCGTCCATTAATACTTTTCTGGGCCGCCCGTCCTTTCTGACGCTGTGTAATCCGATGGATGAGGATTCCCCAGGCCCTacctgcagg	MLLSECEICGQPSHGNHFGVISCRACAAFFRRATLNSKKKLNLNCFHDNNSEINKNGFFSCKKCRLKKCLEKGMDASKFQLDRDKITNAIVPVNTPEIITPSINTFLGRPSFLTLCNPMDEDSPGP	zf-C4
UT245-112	pTH10780	Y71A12C.1	ggcgcgccATGGAAGTTCACCTGTGCCAGATCTGCTCTAACCCGAAATGCGAATCTAAATACGGTTTCTTCCTGTGCTCTGCGTGCTGCAGCTTCTTCCGTCGTAACTTCCACGAAAAAAGCCCGCCGAACTACGCGGCGATCATGAACAAATTCTTTAACCTGCCGTGTTCCCCGGGTCATGTTAACTGTAAAAAATGTCGTTTTGACAAATGTCTGGAAGTCGGCCTGATCCGTCCGGTAACCGACAACCGTGCACGCGAGATGGCAGCTAACCTGAACCTGGTGAACCTGATCCAAACCCTGAAGGACCTGGATATCACTCGCGCTGATAAGTTTTCCAATTATAATCTGATTGGCCCAACGTCCCCTGCTGATGCCATTCTGacctgcagg	MEVHLCQICSNPKCESKYGFFLCSACCSFFRRNFHEKSPPNYAAIMNKFFNLPCSPGHVNCKKCRFDKCLEVGLIRPVTDNRAREMAANLNLVNLIQTLKDLDITRADKFSNYNLIGPTSPADAIL	zf-C4
UT245-110	pTH10781	C47F8.8	ggcgcgccATGGGTCTGATCTCTAAAAACCGTGGTCCGTGCCAGGTTTGCCACAACACCGAAACCACCCGTCGTCATTTCGGTATCATCTCTTGCACCGCGTGCGCGGCGTTCTTCCGTCGTTCTATCGGTATGCAGTACCTGTGCACTGCAGAAAACCGTTGTACTATCTCTTTCGACCGTAAATTCTTTTGTCGTGCATGTCGCTACGCCTCTTGTCTGAAAGCCGGCATGAAACTGGAACTGATTCGCAAACAGAAAAACAACATTTATCTGCGCTTTCCAGACGCTGCTAGCAACCAGCAGAATCTGGTGCGCGACAGCATGAGCCCTGCTACTAGCGAAGGCGGCCAATCCTCCTCCTCCAAGACGGATGAAGAGTCCGATGATacctgcagg	MGLISKNRGPCQVCHNTETTRRHFGIISCTACAAFFRRSIGMQYLCTAENRCTISFDRKFFCRACRYASCLKAGMKLELIRKQKNNIYLRFPDAASNQQNLVRDSMSPATSEGGQSSSSKTDEESDD	zf-C4
UT245-108	pTH10782	F44C8.8	ggcgcgccATGCCGCCGGCGCTGTACCTGTCTGGTCCGTGCGAAATCTGCGAACAGCCGGCGCACGGTAACCATTTCGGTGTTCTGTCTTGCCGTGCGTGCGCAGCATTCTTCCGTCGTGCAGCTCTGCAGAACGCTAAATACCAGGACCGTGTATGCCGTAAAGGTAACTGCATCGGCAACGACCTGTACCGTTGCAAAATCTGTCGTCTGAAAAAATGTTGTGAAGTGGGCATGAACTCTTCTAAATTCCAGAACGACCGCGATCTGATTAGCAGCAGCCTGCGCCCGACCAACTATACCAAAACTTCCGCTCCGCAATCCCTGGCCAATTTTCTGGGCCGCCCAGAATTTATTCTGTGTTGTGAGCCTGATAAGGCCTCCTCCACGAAGacctgca…	MPPALYLSGPCEICEQPAHGNHFGVLSCRACAAFFRRAALQNAKYQDRVCRKGNCIGNDLYRCKICRLKKCCEVGMNSSKFQNDRDLISSSLRPTNYTKTSAPQSLANFLGRPEFILCCEPDKASSTK	zf-C4
UT245-106	pTH10783	K11G9.4	ggcgcgccGCGTACGTTGAAGTTACCGAAGAATCTCGTCAGAAAATCGACGAAATCCCGAACGTTATCGGTGACTGCATCTGCCGTCTGTGCAAAGTCAAATACGAAGACGTATTCAAACTGGCGCAGCACAAATGCCCGCGTATCGCACACGAAGAGTATAAATGCCCGGATTGCGATAAAGTATTCTCTTGTCCGGCTAACCTGGCTTCTCACCGTCGTTGGCATAAACCGCGCAACGAGCTGGGTGGCTCTCCGCCGGCCCAGTCTAGCACCATTGTGAGCTGTAGCACCTGTTTCAATAGCTTTCCAACTAAAAAGATGCTGAAGCTGCATTCCTCCACTTGTCAGCGCTCCCCACTGCAAGATCTGCTGTCCCGCGTGATTCCTACGATGacct…	AYVEVTEESRQKIDEIPNVIGDCICRLCKVKYEDVFKLAQHKCPRIAHEEYKCPDCDKVFSCPANLASHRRWHKPRNELGGSPPAQSSTIVSCSTCFNSFPTKKMLKLHSSTCQRSPLQDLLSRVIPTM	zf-C2H2
UT245-105	pTH10784	ZK678.2	ggcgcgccATGACCCACTTCCGTAAAGTTGAAAACTGCATCATCTGCGACCGTGAAACCTCTCTGTTCAACTACGGTGCGATCTCTTGCAACGCGTGCAAACTGTTCTTCCGTCGTGCAAAAGTCTCTAAAACCGAAATCTCTCCGTGCTCCAACCGTAACCTGTGCCACAAAACCAAAATGAGCACCTGGAAAAGCGCATGTAAAAGCTGTCGCCTGCTGAAATGTGTAAAGGCCGGCATGACCCTGAACAGCACTGATCAGAACTTTAACATGAAGACTTCCGACCGCATCTACGATCTGATTCAGAATCTGCACCATCTGAATCTGACTCGCATGACGCTGGCTTCCTCTCATTGTGTGTCCCAGACGGACCCATCCATTTATGAGATTGCTCAAa…	MTHFRKVENCIICDRETSLFNYGAISCNACKLFFRRAKVSKTEISPCSNRNLCHKTKMSTWKSACKSCRLLKCVKAGMTLNSTDQNFNMKTSDRIYDLIQNLHHLNLTRMTLASSHCVSQTDPSIYEIAQ	zf-C4
UT245-103	pTH10785	ZK1025.10	ggcgcgccATGTCTACCACCGTTGGTCGTCCGTCTAACGAAATCGCGTCTTGCCAGGTTTGCCACTCTACCGAACGTACCCGTCTGTACTTCGGTATCACCTCTTGCGCGGCGTGCGCGGCATTCTTCCGTCGTAGCGACGGTATCCGTTACATGTGCACCGCAACTAACAGCTGTACTATCAGCCATGACATGAAATTCTTTTGTCGTGCATGTCGTTACACTAGCTGTATCCGTGCTGGCATGGTCATGTCCCGCAACGCTCTGGCTACGGCCCGCAAAGCCCCGAACAACATCATTCCGCGCGAACCGACGCCACGCTCCGTACCTTCCCTGGAAGAGGTGGATGGCTTTTCCAAAATTCTGAACATTTCCAATGGCGATCTGCTGAAGTATTATG…	MSTTVGRPSNEIASCQVCHSTERTRLYFGITSCAACAAFFRRSDGIRYMCTATNSCTISHDMKFFCRACRYTSCIRAGMVMSRNALATARKAPNNIIPREPTPRSVPSLEEVDGFSKILNISNGDLLKYYV	zf-C4
UT245-101	pTH10786	R10D12.2	ggcgcgccATGGACCAGTCTAACTCTGACCAGACCAACGAAGTTGCGCGTACCTGCCTGGTTTGCACCATCACCGAAAACGTTCGTTTCCACTTCGGTTCTACCACCTGCCTGGCATGCGCTTCTTTCTTCCGTCGTACCGTTTCTCTGAAAATCCAGTACGTCTGCAAACAGAGCAACAACTGTATCGTAAGCCACGCCGTACGTAGCGGTTGTCGTTCCTGTCGTTTTCAGAACTGTCTGAAATCCGGTATGAAAACTAACATGGTGCGCGGCAAACGCGATATTAACAAAGTGCCGAAGTACATTCGCGAATCCATGCAGCAAGGCGATAATATGACTGTGCGCAATTATACTACTTCCACGCTGGAAACGCTGCATGGCTTTCCAAAGCAAGAAG…	MDQSNSDQTNEVARTCLVCTITENVRFHFGSTTCLACASFFRRTVSLKIQYVCKQSNNCIVSHAVRSGCRSCRFQNCLKSGMKTNMVRGKRDINKVPKYIRESMQQGDNMTVRNYTTSTLETLHGFPKQEELEL	zf-C4
UT245-1	pTH10787	Y53C12C.1	ggcgcgccATGGCGGCACAACAACCTCTGTCTCAAGAACAACTGCTGCATTTTTGGGGCGCTCACAACACCATGGGCAAAATGACCCGCCGTACTTCTCAGAGCGACGGTGGCAAACCGTCCGGTAACTCTAACGCAGCGGGCGGTGCTGGTACTAAACCAAAAGTCGCGACCCCTCAGGTAGTCGCCAAAATTGAACAGTACAAACGTGATAACCCGACCATTTTCGCGTGGGAAATCCGTGAAAAACTGATCTCTGAGGATGTTTGCACCACTCCGCCGTCCGTGTCTAGCATCAACCGTATCCTGCGCACGCGCGCAGCGGAACGTGCGGCCGAAGAACTGCAGATGATCCTGAGCGCACAGCACCTGGCCCGTCCACGTGCGCAGCAGGTTCGTC…	MAAQQPLSQEQLLHFWGAHNTMGKMTRRTSQSDGGKPSGNSNAAGGAGTKPKVATPQVVAKIEQYKRDNPTIFAWEIREKLISEDVCTTPPSVSSINRILRTRAAERAAEELQMILSAQHLARPRAQQVRLPPAFPFPFPLVWPGLLPNPAQLSLLLNSGALAPPVQSGGAGGPGVFGNSGQISVDSNLNLSEDDSTLGANARRLSRSTFTNEQLQSLEEVFLRDPYPSPNERADLVKRTNLPEARIQVWFSNRRAKWRKTNANGSDRDELRAERSETDDALSISSQSPSPGGGQETGSDEGKKKTITLF	PAX,Homeobox
UT245-2	pTH10788	Y66A7A.8	ggcgcgccCAGAAAATGTCTTATGGTCAGAACTTCCAGGCTCCGTGGGATATGCAGCAGCAAATCCAAATGTTTCAGCAGTACCACCAGAACTTCCAAGGCGGTTACTCCGACCCGTTCACCTATCAGAACCAGTACGCGCACCAGCCGAAAATCGTAACCGTTACTCTGCAAGACCCTCAGGACCTGTGGAAGGAGCTGCACTATCTGTCTAACGAGCAGAATGTTCTGAACAACGGCCGCAAAATTTTCCCGGCGCTGAATTACAAAGTGGAACACCTGAACCCGGAATCTAACTACAAAGTTGAAATCCTGCTGCGTCGCATGGTTCCATACCAGATCCAATACTCCAACGGTAGCTGGAGCCGCAAAAACGTGCAGAGCAAAAAGACTATCGCTA…	QKMSYGQNFQAPWDMQQQIQMFQQYHQNFQGGYSDPFTYQNQYAHQPKIVTVTLQDPQDLWKELHYLSNEQNVLNNGRKIFPALNYKVEHLNPESNYKVEILLRRMVPYQIQYSNGSWSRKNVQSKKTIAMKTEKVFVGEFTGQDIMRTGLDLSDVKVFNIGSDNKKKVTPYEEMSDAEKREYDTQYSKKKTSMLEVSNECKYIPVLIINEILPNQELRLVGEFENEITQFATVSSYKNHIVKALRTAANPTSRGDAKQEAVQVGKQWRSSNKSLLESLRPSMICTSVSTTAPSTNFHAPLQYPGTSSP	T-box
UT245-4	pTH10789	F28C6.2	ggcgcgccAACTTCGTCGTTAACATTGAATCCCCTGGCAAACTGGCACACTATTTCCTGCCGAACGTTGAGAGCGAACAGGAACCGAACGAACACATTCCGTACCCATACGCAAAGTCTCTGTTTCCGACCTTTGGTGTTCCTGTATCTTCTGACGGCAACGTTGTGGCAGAAGTAGTTGACGGCCGTCTGCCGGCGGTCGGTACTCGTTCCAAATACGACATTACTGTTGACGAAATCCGTCGTCGCTGCGGCGCTCCGGAACACATGAATCAGTCTGCTCTGTACTGTTTTTTTCGTAAATCTAAAAAGCGTGAAGCCATCAACCGTGTAAAACAGGTCCTGACCGTGCACAACATCCCGATGCGTACTATGCAGCGTCAGCGCAAAGTGACCTGTT…	NFVVNIESPGKLAHYFLPNVESEQEPNEHIPYPYAKSLFPTFGVPVSSDGNVVAEVVDGRLPAVGTRSKYDITVDEIRRRCGAPEHMNQSALYCFFRKSKKREAINRVKQVLTVHNIPMRTMQRQRKVTCFSPFLEEEATALARDLDSISEEFLPINIIAQEMLEKLMSSGNNLDVCHRMLKNTTATITRVIKTLEVRQPKITGQEEKLKGNNLDLSYHNFSLITHGFGHPNSLSHYRSYLSIVERAVLLCEKIQNGQSLLSNEDVIPGQKPFERMSNEYFVEWQMNLYKKKLAKQMEEVEENKS	Ap-2
UT245-5	pTH10790	C09F5.3	ggcgcgccGCGCAGCCTTGCCCGGTTCACGTGTTCAAAACTCTGAAAGTCGAATACCGCCAGCCGCACAACTCCTCTCATGTGAAGCAGGAAGAACGTGCCGACGACAGCCATTCTAACAGCCCAGCGTCTTCTAAATCTATTAAACAAGAAAACCTGCTGAAGTGCGAGCTGTGTTCCACCGTTTGTTCTAGCATCAGCCAGCTGCAGAGCCACACTCTGTCTGAGCACGTTCCGGAAAAGAAGCCGAGCATCTCCACCAGCAACAGCGCCCCGTCTACTAAACGTGTCGCATGCCAGCAGTGTGAAGACACCTTCGAAGATTTCGCGCAATTCGCGATTCACATGAAATCTCACCTGTCTAGCGTTACCTCTCAGCTGTTTTTCTGCCCGATCTGCC…	AQPCPVHVFKTLKVEYRQPHNSSHVKQEERADDSHSNSPASSKSIKQENLLKCELCSTVCSSISQLQSHTLSEHVPEKKPSISTSNSAPSTKRVACQQCEDTFEDFAQFAIHMKSHLSSVTSQLFFCPICPVGTPFRDKKSQLEHLTTQHLQIQVTQHICSICDSAFPSPQAQSVHFAEAHKKYSCTNCDFETENEKTFKEHSKQHSRQLIMYGCALCATSYPSQLHLITHVQMSHDQETFYPPSLPIPTPPSPKSTPKQRVLQCSVCDESVLGEDGLDEHRLRKH	zf-C2H2
UT245-6	pTH10791	K08B4.1	ggcgcgccTCTACCGTCGTAGCAAATCCGATGACTAACTATCAACTGGCTTTCCAGGCGAAACTGGGCAGCCTGCATAGCCTGATCGGTGACTCTGTTCAGAGCCTGACCTCCGATCGTATGATCGATTTCCTGAGCAACAAAGAAAAATACGAATGTGTTATCAGCATCTTCCACGCTAAAGTTGCACAGAAATCCTACGGTAATGAGAAGCGTTTCTTCTGCCCGCCTCCGTGCATCTACCTGATTGGTCAGGGCTGGAAACTGAAAAAGGACCGCGTTGCCCAGCTGTACAAAACCCTGAAAGCGTCCGCGCAGAAAGACGCAGCGATCGAAAACGATCCGATTCACGAACAGCAGGCAACCGAACTGGTGGCCTACATCGGTATCGGCTCCGATA…	STVVANPMTNYQLAFQAKLGSLHSLIGDSVQSLTSDRMIDFLSNKEKYECVISIFHAKVAQKSYGNEKRFFCPPPCIYLIGQGWKLKKDRVAQLYKTLKASAQKDAAIENDPIHEQQATELVAYIGIGSDTSERQQLDFSTGKVRHPGDQRQDPNIYDYCAAKTLYISDSDKRKYFDLNAQFFYGCGMEIGGFVSQRIKVISKPSKKKQSMKNTDCKYLCIASGTKVALFNRLRSQTVSTRYLHVEGNAFHASSTKWGAFTIHLF	LAG1-DNAbind
UT245-11	pTH10792	C04A2.3	ggcgcgccGGCAACCATATGCTGGATTCTCAGAAAAACGCTCGTGTATCTGACCTGCTGATGGACGAAGCTATCATCCAGCTGCACCGTAGCGGTTACAAAATCGATGACGCGCTGAGCGAGCTGAACGCGAACGACATCATTCTGACCACCGACGTTGATAACATGACCCAGGATGACGCGAAAAAGTTCGCCAAAGGTATCAAGCAGCTGGGCAAGAACTTCTCCCGTATTCATCGTGAACTGCTGCCACATCACTCCCGTGAACAGCTGGTTTCTTACTACTACCTGTGGAAAAAGACTCCAGAAGCGACTAAACCGAAACAGGCGGCACGCCGCGTTAACCCGACTTCCATTAAACGTCCGACCAAAGAAAAAGTAAAAGCATCTCGCCCGACGT…	GNHMLDSQKNARVSDLLMDEAIIQLHRSGYKIDDALSELNANDIILTTDVDNMTQDDAKKFAKGIKQLGKNFSRIHRELLPHHSREQLVSYYYLWKKTPEATKPKQAARRVNPTSIKRPTKEKVKASRPTSTEYLDFDSASESDVENNGPSGRACHHCYGAESKDWHHANGLLLCTDCRLHYKKYGQLRQIANRPSQVPACLFKRSNSDEEESGVRTRAGKKEQRRRTPSSMSETPDR	Myb_DNA-binding,GATA
UT245-15	pTH10793	C36C9.2	ggcgcgccATGACTAGCCAGTACTCTAACTACTCCTGTCCGCTGAATAACATTCAGGTGAACGTTATCGGTAGCTCTCGTACTTCTGACGATCATTTCCTGGAACAAATGCTGACCAAACGCAAGAAAACTAATATCTCCCAGGATCTGCACTACCTGCTGCTGGGCCTGAACCCGCGCGAACTGTATCAGATTTCTTTCAAGCTGGCGCGTATTGATGAAAAGAAATACAAATTCAACGGCAACTTCAACGAAGGTGATTACTACCCGCACAAAAACTCCGAGATTCCGATGGAGGATACCGAAGAGATCGTGCACTCTGACGGCTACCAGACGGGTGCTCGCTGGATGAAAACTGGTGTGTATTTTCCGAAGATCGGTATCTCTAAAGAACAGCCGG…	MTSQYSNYSCPLNNIQVNVIGSSRTSDDHFLEQMLTKRKKTNISQDLHYLLLGLNPRELYQISFKLARIDEKKYKFNGNFNEGDYYPHKNSEIPMEDTEEIVHSDGYQTGARWMKTGVYFPKIGISKEQPDKERCLLLESLHAYFPVLVFTTSSGISLEVPVWSQKFVTTMTSSNRSVKRREKRKLEETAGPAAKKTPDIIETTPEDVVPEVYNAQYFYQMQNNTVIS	T-box
UT245-16	pTH10794	K06B9.5	ggcgcgccGATCCGTATTTTCCGCGTATTGCTCTGAACTCTGCTACTTCTTACCCGACTGTATCTGGCACCGTGTCCCTGCCGAAAGCAGAAACTGTAGAGCCGGACCTGTGGATCAAGTCTTTCAAAGGCAACGAAGATCCGCTGCTGAGCGACGGTAGCCACACCGGCGTGAACCAGCTGGGTGGTGTTTTCGTTAACGGTCGCCCGCTGCCGGACACGATTCGCGCTCAGATCGTTGAGATGAGCCAGCACGGTACTCGTCCATGCGATATCTCCCGTCAGCTGAAAGTTTCTCACGGCTGCGTTAGCAAAATCCTGGGCCGTTACTATAGCACGGGTAGCGTCCGTCCGGGTGTAATTGGTGGCTCCAAACCAAAAGTGGCAACCCCTCGCGTTG…	DPYFPRIALNSATSYPTVSGTVSLPKAETVEPDLWIKSFKGNEDPLLSDGSHTGVNQLGGVFVNGRPLPDTIRAQIVEMSQHGTRPCDISRQLKVSHGCVSKILGRYYSTGSVRPGVIGGSKPKVATPRVVECIAGYKRANPTMFAWEIRQKLIEDQICGEENVPSVSSINRIVRNKSFMAQLATPTSVTPSVARPSSATSQNQRSPPRGVQQHMQQSTSVQQLQ	PAX
UT245-17	pTH10795	M163.2	ggcgcgccTGCAAAGCGAATTATATCCCGCCGACTAAAATCACCGAACAGAACGACGAAGATGTGCGCCAGTGTCTGTGGGATGGTTGTACTCTGACTCTGGACGATCGTGCTACCTTCTTCGTTCATGTTGATAACCACATCCAGAAAAACGAAGTCAACTGCAAGTGGCGTTACTGCGAACGCTCCTTCAAGCAAACCTATGAGTTCACCGCTCATAAACGTACTCACACCAAACAGAAACTGTATTGCTGCGAAGTTTGTCCAAAACGTTACGGTCGTCTGGAAAACCTGAAAACTCACCGCCGCACGCATACCGGCGAAAAGCCGTACCACTGCAACGTGCCGAACTGCAATAAAAGCTTTACCAACGCATCCGACCGTAGCAAACACAGCAAAC…	CKANYIPPTKITEQNDEDVRQCLWDGCTLTLDDRATFFVHVDNHIQKNEVNCKWRYCERSFKQTYEFTAHKRTHTKQKLYCCEVCPKRYGRLENLKTHRRTHTGEKPYHCNVPNCNKSFTNASDRSKHSKRTHSNEKPYCCDFGSCACAYTDPSSLRKHVKSKHPEHHAMKMAMRKTQRKSIKQIASEKVQMSPLPTAAEAPISPQQNLPTLPL	zf-C2H2
UT245-18	pTH10796	Y53C10A.12	ggcgcgccCCACCAAATCGTCCTCCGCGTCAAAATCATCAAAACGGTGCTATTGGCGGTAAAAAGTCTTCTGTGACGATCCAAGAAGTACCGAACAACGCATATCTGGAAACCCTGAACAAATCTGGTAACAACAAAGTGGACGATGACAAACTGCCGGTTTTCCTGATCAAACTGTGGAACATCGTAGAAGATCCGAACCTGCAGTCTATTGTTCACTGGGACGACTCTGGTGCTAGCTTTCACATCAGCGATCCGTACCTGTTCGGCCGTAATGTGCTGCCGCATTTCTTCAAACACAACAACATGAACAGCATGGTTCGTCAGCTGAACATGTACGGTTTCCGTAAAATGACTCCGCTGAGCCAGGGCGGCCTGACCCGCACCGAGTCCGACCAGG…	PPNRPPRQNHQNGAIGGKKSSVTIQEVPNNAYLETLNKSGNNKVDDDKLPVFLIKLWNIVEDPNLQSIVHWDDSGASFHISDPYLFGRNVLPHFFKHNNMNSMVRQLNMYGFRKMTPLSQGGLTRTESDQDHLEFSHPCFVQGRPELLSQIKRKQSARTVEDKQVNEQTQQNLEVVMAEMRAMREKAKNMEDKMNKLTKENRDMWTQM	HSF_DNA-bind
UT245-19	pTH10797	K11D2.4	ggcgcgccAACATGATGCAACCTATTCACCTGGCAGCTATTGGTCGTCACTCTAGCCAAGGTGGCTCTGAACGTCACCTGTCCACTGAATCCTCTGTGACGCAGGCTCCGGCCCCGGTCCCGACCACCAAGCGTTCCCGCTCTACCCATGACGGCCTGATGAAATGCCAGTACTGCCCGAAGAAAGTAAACTCTGAAGCGGCTCTGGAGCGTCACATGTCTGAGTGCCGTATGATCCGCCCGCACGAATGTGACCGTTGCGGCAAACGTTTCAAAGCTCGCGGTGGCCTGCAGCAACATATGCGTATCCACAACAACGAAAAAGCCTATGTTTGTACTTTCTGTGCGAAAAGCTTCACGCAGAAATCTCATCTGGACCAGCACGAACGTATCCACACCG…	NMMQPIHLAAIGRHSSQGGSERHLSTESSVTQAPAPVPTTKRSRSTHDGLMKCQYCPKKVNSEAALERHMSECRMIRPHECDRCGKRFKARGGLQQHMRIHNNEKAYVCTFCAKSFTQKSHLDQHERIHTGVKPFLCAFCGRSFRQRSQQIGHESTHLTHFSTSSAQQTPTHGGGGGQTTPSSSASSGSSGSKGDDGAQYNGMLLHP	zf-C2H2
UT245-20	pTH10798	Y75B8A.6	ggcgcgccCATGTAGCTGTATTTGCTCACGGTTCCTCTTCTCAGAATTCCCAAGCACCGCCGCTGCAGGCAGCGTCCGCCACCCCGCCGGTGCCAAGCTCTATGAATCGTTCCCAGTCCCGTGCGTCTTGCCCTCAGTCTACCCGTGAAATGTCTTCCCACCGCAGCACCACTAGCCGTCGTTGCGGTGTTTGCCGTGGTTGTCAGTGCAAACCTTGCGGCCAGTGCACGTACTGCCAGGACTCTCCACAATTTGGTGGCCCGGGTGTCAAGAAACAGTCCTGCATTGAGCGTCGTTGCCTGCGTGTGCTGGAGAACCGCCTGCAACGTGACGCTCCGACTTTCAAAGCCCGCGTTGGCTGCAACGCGTGTGAAGACTGTCGCATGCAGGATTGTCAGA…	HVAVFAHGSSSQNSQAPPLQAASATPPVPSSMNRSQSRASCPQSTREMSSHRSTTSRRCGVCRGCQCKPCGQCTYCQDSPQFGGPGVKKQSCIERRCLRVLENRLQRDAPTFKARVGCNACEDCRMQDCQICLVCLDKRFFENRHIPGAMCAKKRCNNAQSIECVPSLMSQNPADFVQRAPKRSYELINPVISQQQQQQQSQMHFD	zf-CXXC
UT245-21	pTH10799	ZC247.1	ggcgcgccTCCTACGAAAAGCAACCTGAACACGTTATTCCGGTTGTAATTGAGGAAACCGAAAAGAAAGACGAACCTTCTCTGAAGTCTAAAATTACTGGCCTGTTTAAGAAATCTCCATCTCACCTGGATTATCCGGTTTCTGAATCCTACGATGGTCCACTGGAATCTACCTCCCGTGCGTCCAACATCCACGACATCCCGCTGACCACTCTGGTACACTCCTACCCAACTGAATTTTCTTACGAGAAACAACCGGAGCACGTAATCCCGGTTGTTATCGAGGAAACCGAGAAAAAGGACGAACCGTCTCTGAAAAGCAAAATCACCGGTCTGTTCAAAAAAAGCCCGAGCCACCTGGACTATCCGGTGTCTGAATCCTATGATGGTCCGCTGGAAA…	SYEKQPEHVIPVVIEETEKKDEPSLKSKITGLFKKSPSHLDYPVSESYDGPLESTSRASNIHDIPLTTLVHSYPTEFSYEKQPEHVIPVVIEETEKKDEPSLKSKITGLFKKSPSHLDYPVSESYDGPLESTSRASNIHDIPLTTLVHSYPTEFSYEKQPEHVIPVVIEETEKKDEPSLKSKITGLFKKSPSHLDYPVSESYD	HTH_psq
UT245-22	pTH10800	F26A1.2	ggcgcgccGTGCATAAGTCTCGTAAGCGTAAACTGATGGTGACCGAAGATCAATGGGGTAGCCAGATCACTATCCCGAAGGTTATCCAAAACCGTCCGCTGATCGAAAAGTGGTTTGTACAGAAACGTTTCAAAATGGTTAAAGTACGTAATATTCAGCGTCCACAGCTGAGCTACCAGCTGCTGTCTGCCCTGACCTGTCTGAACAGCCCGGACGGTATGATCAGCACTACCGAAAACTACTCCTTCATCCTGCACCATTGGCGTTACTACCGTTACGCTAACGAAAACTGGAAAAACTCTGTCCGCCACGTCCTGTGCAAATGTCAGCTGTTCGATGTTCTGCAGGTTGAAGGCCTGTCTCGTAAAGGTAACGTATACAAACTGAAACGCCCGGACA…	VHKSRKRKLMVTEDQWGSQITIPKVIQNRPLIEKWFVQKRFKMVKVRNIQRPQLSYQLLSALTCLNSPDGMISTTENYSFILHHWRYYRYANENWKNSVRHVLCKCQLFDVLQVEGLSRKGNVYKLKRPDNVEKEMIDVKTLGCMQKDSRGIDFYIKMLAGQIGLPRHLFYSIVGNEMPEYAGPENSAIFYHLLSMRKI	Fork_head
UT245-23	pTH10801	T26C11.1	ggcgcgccATGACTGTGACTCGTAATGGTTGCCGCATTTTTCCTAAACTGCACTACGAAGTGCACGGTCTGGTGGCCGACAAATGCTACTCCATGGTATTCCACATCGCGGCACAGTTCAAAGAACCGAAATTTATCTGCCACCCTGCTGGCATCAAGATGGGTGCTCTGTGGACTTCTCGTACCATTTCTTTCGAAGACTTTTTCATCACCACCAACCCGCAGCCGACCGACAACAGCATGATCCACCTGCCGCCGCACTGTAAATTCACCCCGATCCTGGATGTTTACGAAGTTGTCCTGGATCACATGCAGCAACCAGCGACCATGCATCGTGTTTCCTCCTGTCGTCTGCCGTATACCTTCATGACTGTTACCATGTACAAAAACCGCGAGGCGC…	MTVTRNGCRIFPKLHYEVHGLVADKCYSMVFHIAAQFKEPKFICHPAGIKMGALWTSRTISFEDFFITTNPQPTDNSMIHLPPHCKFTPILDVYEVVLDHMQQPATMHRVSSCRLPYTFMTVTMYKNREARVLKLGMNPHARHFLKNNTNKNHLDTASLIPPIPSVQPLPLFPLPQNSMSYTFSYDTYPSNIHVAPI	T-box
UT245-24	pTH10802	K02D7.2	ggcgcgccATGTCTATCAACACCAAACGCAAATCTATCTTCGAAACCATCGAAGATCTGATTAGCCCGGACCCGGCTCCGTCTTCTTCCTCCTCCAGCGCGTCCTGCTCCAGCCTGGATAACCAGAAACTGGTGTGCCAGTTTTGCAAAAAGACTTACCTGACTTACTTCGGCCTGCGCCGTCATCTGCAGTTCCACAAAGAAGGTAAACTGCAGCAGAGCTGCCCACATTGTAAAAAGGTATATCGTTCTCCGGGCGCACTGAAAATGCACCTGAAAACCCATTCTCTGCCGTGTGTCTGTAACGACTGCGGTAAATCCTTCTCTCGTCCTTGGCTGCTGAAAGGTCACCTGCGTACCCACACTGGCGAAAAACCGTTTGGTTGCGAATTCTGCGGCC…	MSINTKRKSIFETIEDLISPDPAPSSSSSSASCSSLDNQKLVCQFCKKTYLTYFGLRRHLQFHKEGKLQQSCPHCKKVYRSPGALKMHLKTHSLPCVCNDCGKSFSRPWLLKGHLRTHTGEKPFGCEFCGRCFADRSNLRAHLQTHSGEKKHRCSRCGQSFARVQVRQRHEQCCRGGGSGGEAEKEDVEVDGD	zf-C2H2
UT245-25	pTH10803	F44B9.6	ggcgcgccTGTCAAGTAATCCCAGAAACCCTGTCTCGTATGACTCGTACTCCGCCGGATGGTGAACACCTGGAAGTATATCGCATGTCTAACGGTCGTCTGCGTATTTACGTAGTTGACCATTTTAAGAAATTCAGCCCGTACAGCAACCTGACCCACAAACCGTGCACCGTGTGCAACCGTGTTATGAAATCCGGTGAAATGCACCTGAACTTCCCGGCTGACCTGGACCGTCGTCGTATTTGGGCAAACCTGCTGGGCTTTAAATACAAAGACATCCTGCGCTCTAAAATGGGTCCGGTGAGCTTCTCTATCGCAGCGGGCCCGATCTGCACTGAACATTTCGCTGAAGAGTGTTTCCGCAACCACAACTTTAACAAGTCTGCGATCGAGGCGTTCG…	CQVIPETLSRMTRTPPDGEHLEVYRMSNGRLRIYVVDHFKKFSPYSNLTHKPCTVCNRVMKSGEMHLNFPADLDRRRIWANLLGFKYKDILRSKMGPVSFSIAAGPICTEHFAEECFRNHNFNKSAIEAFGVPVAISPDVKTTPSKKSSRVPWVCTVCEFHSCSVVELQTHLLNHTEEMLKKKDNVLDVPEA	THAP
UT245-29	pTH10804	R08H2.9	ggcgcgccTCTTTTTCCGAATACGCTAAATTCAAGGCGACGTACCACCTGCATCCTCTGTCTAACAAAATCGATCAGAATGTAGCGGTTGTGCAAGGCAACGGCCTGCTGTTCGATCAGTCCGCATCTTGTTGCCTGCTGATGCACTTCATGAACATCCCATGGTGTGAAGTGTGCCATGGTGCTCCGAAAGGTGCCCAATATGGTGCCCTGGCATGCCTGGGTTGCATCGTCTTCTTCCGTCGCGCTATTGTTGGCGAAAACATCAAACGCAAATGCAATCTGAACTGCGATATCCTGTTCGGTTCTACCAACCTGTTCCAGTTTAACAGCGTTATCATTATCGCTGAGAAGAAAAACTGCTGCCGTAGCTGTCGTCTGCAGAAATGTCTGAAAGTTG…	SFSEYAKFKATYHLHPLSNKIDQNVAVVQGNGLLFDQSASCCLLMHFMNIPWCEVCHGAPKGAQYGALACLGCIVFFRRAIVGENIKRKCNLNCDILFGSTNLFQFNSVIIIAEKKNCCRSCRLQKCLKVGMDPNAVQHRDLIGPRKPIKLILKKKADAISGSCEIDFDYLMELQRKQTIKWER	zf-C4
UT245-30	pTH10805	R08E3.4	ggcgcgccACCGAAATCACTAACACTCTGATCAAAAAGGAACCGGGCACGAAAGGCCAGAAAACCGTTCACGTATGCCCTCACTGTAACTTCACCACTTGCATGTCCCAGCATATGAAAAGCCACCTGGAAGCGCATGAACGCCACCAGGGTCAGATGTACCAGTGCGATATCTGCAAAATGCAGTTTTCTCAAAAGGCAAACATGCATCGCCACCGTATGCGTCATAGCGGCGTCAAGCCGTATGAATGCCGCTTTTGCAAAAAGCGTTTCTTTCGTAAAGATCAGATGCAGGAACACTCTATGACTCACATTAAAACCGGTTTCGGTTTCGACTGCCCGGTGTCTCAGTGTAACATGCAGTTCTCTCAACACAACGCTCTGCGTGCTCACCTGGAAG…	TEITNTLIKKEPGTKGQKTVHVCPHCNFTTCMSQHMKSHLEAHERHQGQMYQCDICKMQFSQKANMHRHRMRHSGVKPYECRFCKKRFFRKDQMQEHSMTHIKTGFGFDCPVSQCNMQFSQHNALRAHLEETHTISSTNPASCKRCNLMFANSRRLLLHFQTRHDDSESSPKKENTPKRKKLS	zf-C2H2
UT245-32	pTH10806	C05D2.6	ggcgcgccCGTCACGGTACTGAAGATTATCAGATTGCTGGCCTGAAACACAGCATGACCTCTGTTGCCTCTTCTTCTCATGGTGGTGCAGGTGACCTGCAGCAGCAATTTTCCCGTGAAGATCCGCCGGTAAAAACCACTCAATATACCCTGCTGCAGCTGATCAACATGGTTCGTGAAAACCCGATCCTGTACGATGAAGAAATGCAGGCGGCGACCCCGGATGCACAGCTGAAAGTACAGAAACGTGAAGCGTGGGACCGCATTCGCGCTGACATTGTGTGGCAGGATATCACCCTGGTCCAGGAAGTGTGGTCTGATCTGCTGGATCAGTACGCTCGTAAATCTATCGATATGTCCGATGGTCTGATCGAAGCGATGCGTTGGACTGACTCCCTGA…	RHGTEDYQIAGLKHSMTSVASSSHGGAGDLQQQFSREDPPVKTTQYTLLQLINMVRENPILYDEEMQAATPDAQLKVQKREAWDRIRADIVWQDITLVQEVWSDLLDQYARKSIDMSDGLIEAMRWTDSLIFKKKSDSRPPSQLTAMSSGLDKDFYNDVPLAEDVLEPGQSLGNSESMKFDY	MADF_DNA_bdg
UT245-34	pTH10807	F13H6.1	ggcgcgccGTTGCAATTCGTCGTCGTGCATCTCCAGAAGAAGAACTGACTCCACCGCGCAAATCCATGAAAATCGAGGAGGAAGACCAACTGATCGTAGTTGACGATGGTGAGCTGGCCGAACCGGCAGCCCGTAAGCCTAACAACATTAAGAAGGAACGCTGTAACTTCTGCAACAAAGTCTTCACCAACCGTAGCAATCTGATTGTTCACCTGCGCTCTCACACTGGTGAAAAACCGTACAAATGTCAGCTGTGCCCTTATGCGTGTGCGCAGTCTTCTAAACTGACTCGTCACATGCGTACCCACGGCCAGCAGGGCAAAGAAACGTACCACTGCTACATCTGCCGCATGCCGTTTTCTGTACATAGCACCCTGGAGAAACATATGCGCAAATGCG…	VAIRRRASPEEELTPPRKSMKIEEEDQLIVVDDGELAEPAARKPNNIKKERCNFCNKVFTNRSNLIVHLRSHTGEKPYKCQLCPYACAQSSKLTRHMRTHGQQGKETYHCYICRMPFSVHSTLEKHMRKCVVSTQGRREGGSPPERSIRPTPSALAEATSLLALSAPSISVPPQPQASTV	zf-C2H2
UT245-35	pTH10808	T27B1.2	ggcgcgccGAAAACACCCCTGAAATGGTCTTTGGTTCCTTTCCAATCCACTCTGGTTTCTGCACCCAGGTTGTTACCCACACCGACCCGATGAACAACAACAATCAGCCGAAAACCAACGCGAACGGTCGCGCACTGGCTGCGGACCGCAAACGTCCGTACCCGTGTAACCTGTGTTCCTCTAAATTCGGCAGCAAAATGGAACTGGAAGAACACCAAAACTCCCATACTGGCCAGAAACCGTTCGAATGCGACACTTGCAACGCACGTTTCAACCGTCGTAGCACCCTGTGGAACCATAAACGCATCCATTCTGACGCTAAACCATTCGTATGTACGGTGTGCCAGATGACGTTCAAATGGAAAAACAGCCTGAAGTGCCACAAGGATATGCACCAGC…	ENTPEMVFGSFPIHSGFCTQVVTHTDPMNNNNQPKTNANGRALAADRKRPYPCNLCSSKFGSKMELEEHQNSHTGQKPFECDTCNARFNRRSTLWNHKRIHSDAKPFVCTVCQMTFKWKNSLKCHKDMHQRKNETSAHLDNDLRQLTYATAAKRKLQMEQEENGGLPASSSASSVISHP	zf-C2H2
UT245-36	pTH10809	ZK662.4	ggcgcgccGAGCAAGAAATTATTCCTAAACTGTTCCGTCAGCCACGTAAGCAGGTGCTGGAAGCCGATCAGCACGACGGTACTGTCAAAGTTATCGAACAGGAAGATTTTAAACTGCCGACCGTAAAGCCGAGCGAAAACGAAGAATGCGATAACCCGGGCGTATGTTGCTTCTGTTCCAAACGTGGTGACCGTGGTGGCATGCTGCGCGTTCCGCGTTCCGAAGAACGCCTGGCGCGTTGGGTTGATAAACTGGGCCCGGAATTTGAAGCGCGTCTGCATACCAATACCGAAAACCTGATCTGCCGTTCCCACTTCCCGGACGCGGCATTCTCTTCTCGCGGTCGTCTGCTGAAAGGTATGATCCCGGACGCAGCTCCAGAAAAGGTTGAAACCACTT…	EQEIIPKLFRQPRKQVLEADQHDGTVKVIEQEDFKLPTVKPSENEECDNPGVCCFCSKRGDRGGMLRVPRSEERLARWVDKLGPEFEARLHTNTENLICRSHFPDAAFSSRGRLLKGMIPDAAPEKVETTYIIQGNNFLKLKERKSGTDKNSAIDLANMLNPDGVEYTQEEEEEEEYEE	THAP
UT245-37	pTH10810	F49H12.1	ggcgcgccACTCACGGTAGCAACCAGTCTGTTTATCATCACAACCAGCATATGGACGACTCCGAAATGATGATGGATGAACAGGACTATTCCCAGTACCAGATGGGCTTTCCAGAAGAAGATGAGATGGTTGAAGGTATGATGACTCCGCGCGCTGTTCACCAGTGCAACGTATGTAACAAAATCTTTGTATCTTACAAAGGCCTGCAACAGCACGCAGTGATCCATACTGATCAAAAGCCGTTCCGCTGCGACATCTGTTCCAAATCTTTCCGCTTCAAATCTAACCTGTTCGAACACCGTAGCGTTCATACCGGCTTCACCCCGCACGCATGTCCGTACTGCGGTAAAACCTGCCGCCTGAAAGGTAACCTGAAAAAGCACCTGCGTACCCACGTGA…	THGSNQSVYHHNQHMDDSEMMMDEQDYSQYQMGFPEEDEMVEGMMTPRAVHQCNVCNKIFVSYKGLQQHAVIHTDQKPFRCDICSKSFRFKSNLFEHRSVHTGFTPHACPYCGKTCRLKGNLKKHLRTHVTTKEELEAAWRPFASNRRPPADIPDDAIVLRGAGGPYYTPPPRPKKKKL	zf-C2H2
UT245-43	pTH10811	T09D3.4	ggcgcgccATTGATCCTTCTATGTATCCGCGCTACGAATATGCAAACCTGGACATCAGCTCTTTCGAACGTTCCCCGACTTTCGAACAGCCACCGTCTTACCCGACCTATGACCAGCACGTCCAGTTTCTGCCGGAAATTGAGAACAACGGCCCGAAACAGAAATGCCGTGTTTGCAACCTGGAGGCACACGGTATGCACTTCGGCGTTCAGACCTGCCGTCCGTGCGCCGCGTTCTTTCGTCGCATCGTCGTGCTGGATCTGAAGTACACCTGTGTATCTAACACCCAGAAATGCAACGTTGATGGTCGTGGTCGTAACGTGTGTCGTGACTGTCGTTACAAAAAGTGTATCGCGGTTGGCATGACTACTGACAACGTACAATACAACCGTGATAGCC…	IDPSMYPRYEYANLDISSFERSPTFEQPPSYPTYDQHVQFLPEIENNGPKQKCRVCNLEAHGMHFGVQTCRPCAAFFRRIVVLDLKYTCVSNTQKCNVDGRGRNVCRDCRYKKCIAVGMTTDNVQYNRDSHNNKNSSGSGGGRGRGKNKRNVMMMLTDEEEAAGSMMALHR	zf-C4
UT245-44	pTH10812	C50B6.1	ggcgcgccATGTCCCGTCATCATGTAACCAAAGAGGGCGAGAAAAACGGTGAAACCCTGTTCACGCCGGAACAGCTGCAACTGCTGCGTCGTGGTTTTGCGCCGCTGTATCTGCAGGAAGCTTACAAAAACCAGGAAAAAGAACGTAACTGGCGTAAGGAAATCGGTGGCTATAAAATGAAGCGCCAGCGTCTGCCGGCTATCACCGGTCGCCAGAAAGCGATGCTGCTGCAGGTGATGGATCGCACCAAGTGGCCGCAGGGCTCTGTGGATCGTCAGAAAGTTGCAGACAAGATTACCCACCAGTACCGCGTTCACCCAGAAAACCAAATGTACATGCAGAACAGCAAACGCCAGACTCGTGAAAAAATCACTTCTGAGCAGAAATTTCAACTGGAAA…	MSRHHVTKEGEKNGETLFTPEQLQLLRRGFAPLYLQEAYKNQEKERNWRKEIGGYKMKRQRLPAITGRQKAMLLQVMDRTKWPQGSVDRQKVADKITHQYRVHPENQMYMQNSKRQTREKITSEQKFQLEKALLENPKPLMGSVDREHFRREKCPTVRRDQFEHFLKRN	Homeobox
UT245-45	pTH10813	T09E11.2	ggcgcgccAGCGTTTCTAACATGCTGGATCGTATTTCCGGTCTGTCTAAAGATGCTTCCCCGAATAGCACTACTACCATCCAGGAAATCATCACCCTGGAGAAATGTCTGACCTCTAAGGTTTCTGCTCTGTTTCTGATTTGCAAGATGCTGAAAATCCCAGCATGCCCGGTTTGCGACGTACCTTGTCGTATTGAACCGCACTTCGGCGGTATTGCATGCGCAGCGTGTGCGGCGTTTTTCCGCCGTACCGTATCTCTGAACATCGGCTATATGTGCAAACGTGAAAAACTGTGCCGTAAAGCCCGTAAATCCTGTCGTGCTTGCCGTTTCGAGCGTTGTGTGAAATCCGCTGGTCTGCAGCGTGATTACGTGCGCCAACTGCTGACCCCACGCAACA…	SVSNMLDRISGLSKDASPNSTTTIQEIITLEKCLTSKVSALFLICKMLKIPACPVCDVPCRIEPHFGGIACAACAAFFRRTVSLNIGYMCKREKLCRKARKSCRACRFERCVKSAGLQRDYVRQLLTPRNTPLYILNRQDNTGGEIVRAFASPTMPKPEPTPQLGFSDI	zf-C4
UT245-46	pTH10814	C17E7.7	ggcgcgccCTGTATGATTACGATTACGTGCTGAACAACGAAGCCGAAAAATATGACCTGCTGAAGAAATTTTGTAAATTCGTTTCTTCTAAAAAGAAGTGGATTTCTCAGTTCTACTTCAAGCGCATCATGCAGAAATACTCTGACATCATCAAAGACTTCGGCAGCCAACCGAAACAGGTTCTGACTTGTGATGCGTGTAAGATGTTCTTTCGCCGTGTAGTCACGGAAAAACTGGAATATACTTGTAAATGCAGCAACAACTGCTTCGAGGGCTTTTCCGAAGACTCCACCATTTATCCAAAATGCAAAAGCTGCCGTTACCAGGAGTGCCTGAAATTCGGTATGAACTACGCTTTCCGTAAACAGAAACGTCTGCTGGAAATCCGTAACAAAAAAG…	LYDYDYVLNNEAEKYDLLKKFCKFVSSKKKWISQFYFKRIMQKYSDIIKDFGSQPKQVLTCDACKMFFRRVVTEKLEYTCKCSNNCFEGFSEDSTIYPKCKSCRYQECLKFGMNYAFRKQKRLLEIRNKKDDELDAIIDGLRYLDNHRRETLRTKFTISNPTLQE	zf-C4
UT245-47	pTH10815	Y48G9A.11	ggcgcgccGAGCGCCTGAAGAAATGGCCAGAAATGTATCAAGTTCCGCGTAAATGTCGCAAAAGCCAAGACTTTGCGGAAATTCGTCCGGCGGTGGGTTCTGTACGTATCGAATTCTCCAAGAAACCGGAAATCGTTGCCAAACCGCGTATTGTTGTACCGTGCCCAAACTGTGATTTCGTTTTTGGCTCCGGTCGTGCGCTGGCTCAGCACCAGGCGAAACACTCTAAAACTGTTAAATCTGAAATCTCTACCCGTCAACCGGGTTTCCTGTGTCCGATTACCGACTGCACCGCACGCTGCGATTACCAGGCTACCCTGAACGAGCATGTTCGCGCCCAACACGAGAACGAACAAGTTGCTTACGAGACTATGCAGTTTGCCAACTTCAATGAATTTG…	ERLKKWPEMYQVPRKCRKSQDFAEIRPAVGSVRIEFSKKPEIVAKPRIVVPCPNCDFVFGSGRALAQHQAKHSKTVKSEISTRQPGFLCPITDCTARCDYQATLNEHVRAQHENEQVAYETMQFANFNEFERWKENLEYSTSSRFVHTSGRYTTTGKTRRYS	zf-C2H2
UT245-99	pTH10816	F13G11.1	ggcgcgccATGTCTCCGCACATCATCGCGACCGTTACCATCGACGACGAACACCATCATCACCACCACCGTTCTAACGAAAACTACTCTCCGTCTTCTCAGGACATGGACTCTCCGAAACCGAAAGGTCGTATCCTGTACTGCCGTAAATGCGAAGGTCATGGTGAAAAAGTAATCCTGAAAAACCACTCTCCGCAATGCCCGTACATTCTGTGCAACTGTAAAAGCTGTGAAAAACTGAACTATAAACGTCTGAAAAGCTTCAACAAACGTAACAAAGAAAAGATTGAACTGGCGGCAGCCCTGAATGCTAAGCGCCACGCTCCAGAAAGCGGCAGCAGCGTGGATGATGAGGAGGGCTTCTCCCGCCGCTCCTCCTTTTGTTCCAAGACTTCCACGC…	MSPHIIATVTIDDEHHHHHHRSNENYSPSSQDMDSPKPKGRILYCRKCEGHGEKVILKNHSPQCPYILCNCKSCEKLNYKRLKSFNKRNKEKIELAAALNAKRHAPESGSSVDDEEGFSRRSSFCSKTSTPDMDSE	DM
UT245-90	pTH10817	C14B9.6	ggcgcgccACCCGTGCGTTCATCATGGACAAACTGGGTTCTACCCGTGTTGCGGTTAAATTTTGCACCCCGTGCAAAAACGCGCTGACCCGTTGGATCAACGACGTTAACAACAAAGAAGAAACCATCATGGCAGAACTGCTGAACTACGAAGGTCAGGTTGGTTGGACCGACGACGAAAAAACCAAACTGGTCACTCTGATCAACTCTTCTCCGACTCTGGACTGGGTAAGCATTAGCGAAGGTATGAACCGTCGTCCGAACGAATGTAAGATGCAGTATGATGCAATGAACGGTGTAAAGACTCAGCCAATGATTGAAGAAGTGGATGAAGAGGATGGCAACGGCCAAGAGGAGGGCGGCGATGCACTGGTGAATACTCCTACGACGTCCTCCGCTG…	TRAFIMDKLGSTRVAVKFCTPCKNALTRWINDVNNKEETIMAELLNYEGQVGWTDDEKTKLVTLINSSPTLDWVSISEGMNRRPNECKMQYDAMNGVKTQPMIEEVDEEDGNGQEEGGDALVNTPTTSSAAARRSGLARNA	Myb_DNA-binding
UT245-89	pTH10818	C03G6.8	ggcgcgccATGAAAAACCTGAAAATCAAAAAAGTTAAAGAATCTAACAACTTCATCACCCCGATCACCTGCTCTGTTTGCGGTCGTTCTGCGAAAGGTTACCACTACGACGTTATCTCTTGCAAAGGTTGCAAAACCTTCTTCCGTCGTATGTACCTGCTGAAATCTAAAATCATCTGCGGCCTGAACAACAGCTGTTTCGACCTGAAAAACAAAAACGAACCATACCTGCGTTGTCGTGCATGTCGTTATAAAAAATGTATCGACGTCGGCATGAACCGCAACGGCATTCAGAGCAGCGAAAGCAAAAAGGAATTCAACAAGACTCAGAAGCTGAATTTTCAAGTAATGGAATCCGCTGATGATGTGATGAATTCCATTATTGAACGCCTGTCCTATG…	MKNLKIKKVKESNNFITPITCSVCGRSAKGYHYDVISCKGCKTFFRRMYLLKSKIICGLNNSCFDLKNKNEPYLRCRACRYKKCIDVGMNRNGIQSSESKKEFNKTQKLNFQVMESADDVMNSIIERLSYVESKLEIFRTS	zf-C4
UT245-87	pTH10819	DY3.2	ggcgcgccGACTCTGCGCAGGACGAACTGGCGAAATACCGTATCGAATACGACGCGGCGAAAGTTGAAGTTAAAAAACTGAAACCGCAGGTTGAAAAACTGGAACGTGAACTGGCGGGTGCGGAAGAACAGGCACTGCACGCACAGAGCATCGCAGACCAGTCCCAGGCAAAACAGAAAACCCTGCAAGCTCGTAACGACAAACTGGTTGTCGAAAACGACGATCTGAAAAAACAGAACATCACCCTGCGTGATACCGTAGAAGGTCTGAAAAAAGCTGTAGAAGATGAAACCCTGCTGCGTACTGCTGCTAACAACAAAATTAAGGCTCTGGAAGAGGATCTGGCCTTCGCCCTGCAGCAGCACAAGGGCGAGCTGGAGGAGGTGCGCCATAAGCGCC…	DSAQDELAKYRIEYDAAKVEVKKLKPQVEKLERELAGAEEQALHAQSIADQSQAKQKTLQARNDKLVVENDDLKKQNITLRDTVEGLKKAVEDETLLRTAANNKIKALEEDLAFALQQHKGELEEVRHKRQVDMTTYAKQIN	bZIP_1
UT245-80	pTH10820	Y80D3A.4	ggcgcgccATGATCACCCCGTTCTCTTCTTCTCCGTCTTCTTCTACCAGCGACAGCCAGACCCCGGAAATCACCGCGATCGGTTTCAAAAAATGCGCGGTTTGCGGTCTGGACGCGAAAGGTAAACACTTCGGTGCATTCAGCTGCCGTGCATGCGCTGCTTTCTTCCGTCGTGCTAGCACCCAGTCCGCCTCCATCGGTCCGTGCAAAAAATCCCGTACTTGCAACCTGTTCAACGGCAACGGCTGGTTCCAGTGTAAAAAATGTCGTCTGGAACGTTGTTACAAAGTTGGCATGACTATGAAAAACTTCCAGTTTCAGCGCGATCACATCCGCTCCAAAATCGAAATCATTAACAACAAGCTGCCGGAATCCATTGAAAAGCTGGTCGGCCGCCCAT…	MITPFSSSPSSSTSDSQTPEITAIGFKKCAVCGLDAKGKHFGAFSCRACAAFFRRASTQSASIGPCKKSRTCNLFNGNGWFQCKKCRLERCYKVGMTMKNFQFQRDHIRSKIEIINNKLPESIEKLVGRPFFVVHCKPTLIEIHTQQN	zf-C4
UT245-78	pTH10821	C50B6.14	ggcgcgccATGGACGAACCGTCTTGCTCTAACTCTCCGGTTGACCTGCCGGAAATCATCCCGCAGCTGAAAGTTTACGCGGAACGTCCGAAAGACTGCTTCGTTTGCGGTGGTAGCGCGAGCGGTTACCACTACGACGTTCCGGCGTGCAACGGCTGCAAAACCTTCTTCCGTCGTTATGTTATCAGCAAACGTCTGTTCACCTGCAAACTGAACGACGACTGCTTTGATCTGTCCACCCGTGATGTCCCAGTCAAATGTCGCGCATGTCGCATCAACAAATGTTTTGCAGTAGGCATGAACCCTCATGCTCTGGAAGTAGATAAAACTAACACTGATTGTCTGAAAGAAGTGACGAAACGCAAAAACATGATCGGCAACGATGCTGTGAACGAAAAGC…	MDEPSCSNSPVDLPEIIPQLKVYAERPKDCFVCGGSASGYHYDVPACNGCKTFFRRYVISKRLFTCKLNDDCFDLSTRDVPVKCRACRINKCFAVGMNPHALEVDKTNTDCLKEVTKRKNMIGNDAVNEKQLVLNSLESMENKIQKIAD	zf-C4
UT245-73	pTH10822	D1081.2	ggcgcgccGAAGCGGAAGACTTCGCGCAGCTGCTGCAGAAACTGCAGAACGCGTCTCCGGCACTGCCGGAAGGTACCTCTTCTACCCCGACCCCGTCTTCTTCTACCGGTCTGCTGCCGAACGGTAAAAAAACCAAAGGTCGTGTTAAAATCAAAATGGAATACATCAACAACAAACTGCGTCGTTACACCACCTTCAGCAAACGTAAAACCGGTATCATGAAAAAAGCATTCGAACTGAGCACCCTGACTGGTACTCAGGTTATGCTGCTGGTCGCTAGCGAGACTGGTCACGTATACACTTATGCTACTCCGAAGCTGCAGCCGATGATTAGCTCCGACACGGGTAAGGCTATGATTCAGTCCTGCCTGAACGCCCCAGGCGGCGACGGCTCCGATG…	EAEDFAQLLQKLQNASPALPEGTSSTPTPSSSTGLLPNGKKTKGRVKIKMEYINNKLRRYTTFSKRKTGIMKKAFELSTLTGTQVMLLVASETGHVYTYATPKLQPMISSDTGKAMIQSCLNAPGGDGSDVQPSRTEFTFDSGNGGNGMRK	SRF-TF
UT245-66	pTH10823	B0310.2	ggcgcgccAAAATCGATGTTGAATCCGACGAAGGTGAAATTGAAGTGAGCCCAAGCCCGTCCACGGGTGACATCACCGAAAACGAGTCTTCCTCCAGCTCTACCGGCCCGATGATCAGCCCGAACTGTGGCGACGGCGATTGCGCGCTGGAAAAACCGTTTATCTGCATGCATAACAACTGCGGCAAGCGCTTTGCTAACAAGTTCCTGCTGAAAAAGCATATGTTCATTCACACTGGTCTGCGTCCGCACACTTGCCCTCATTGTCACAAAAAATTCAACCGTAAAGATAACCTGCTGCGTCACAAAAAAACTCACTCTCCTACCTCCGCACACCTGGGCCCGATTCTGCCGAAAAATCCGTTCCACGGTATCCCGCAGCTGCCAGTACTGCATAATA…	KIDVESDEGEIEVSPSPSTGDITENESSSSSTGPMISPNCGDGDCALEKPFICMHNNCGKRFANKFLLKKHMFIHTGLRPHTCPHCHKKFNRKDNLLRHKKTHSPTSAHLGPILPKNPFHGIPQLPVLHNIALTQGFSHFHALKMSLETGATA	zf-C2H2
UT245-65	pTH10824	F34D6.2	ggcgcgccAACGTTCTGCGTGACTATTACGACATGGGTAACTTTAAAATCTCTGGTAACAAAGAAAAGCTGGTGGCCCTGACGGGTATGTCTGATCGTCAGATTGAACTGCACCTGCAGAAATACCGTCGCGAGGATAAAAAGAACGGCGTTATTATCCCAAAATCTGTTTACACCCCGGAACAGCACGCTGTGCTGCGTGAGGGTTTCGAGCATTGCTCTTGGCTGAGCAAATCCACTCTGAATAAACTGGCGTCTGAAAGCGGCCTGACTCGCACCCAGGTTTCCACTTGGTTCAGCAAAGAACGTCGTGTCCGTGCAGGCAAGAAATCCAAACGCTCCAAGAAAATCGTGAAAACCGAAACCCCGGCTTTTGTACTGTCTTACCAGCCTCTGGAAC…	NVLRDYYDMGNFKISGNKEKLVALTGMSDRQIELHLQKYRREDKKNGVIIPKSVYTPEQHAVLREGFEHCSWLSKSTLNKLASESGLTRTQVSTWFSKERRVRAGKKSKRSKKIVKTETPAFVLSYQPLEQFLQKQAGEKTRQLVYFSIENILS	Homeobox
UT245-61	pTH10825	F45C12.3	ggcgcgccGCAACTGAAGTAGGTGAATCCGACCGTGCTGTCAATATTGTGCGTGCAATGGACGAAAAAGAGCTGCGCCAGGATGCGGCGACTCTGAAGAAACAGAAAACGCGTCAGTACATGCGCGAATACTACCTGCGCCACCGTGGTCCGCCGGGTCAGCGTAACTCCCGTTGGCCTCAGGAAGTTAACGACCTGCTGGCCGAGGAATACAAGAAAAACAAGACCCCGATCTCTATGGATTTTGACCGTCTGTCTATCGAGACTGGCAAAACCCAGCGCCAGATTAAACAGTGGTTCTGGCGTCATAAAGCGAAACAGAGCACCACCAACTATCAACAACGTGTTACCGCTGAACCATATGCTGTGCGCAAAAGCGAAGAACTGGAAAAACCAGATG…	ATEVGESDRAVNIVRAMDEKELRQDAATLKKQKTRQYMREYYLRHRGPPGQRNSRWPQEVNDLLAEEYKKNKTPISMDFDRLSIETGKTQRQIKQWFWRHKAKQSTTNYQQRVTAEPYAVRKSEELEKPDELEEIKDPREPEKPKPERLMGPEPS	Homeobox
UT245-59	pTH10826	K06B4.10	ggcgcgccATGTTTACTCTGGCTCGCGTGCTGAATAATATCGGTTCTGCTTCTTCTAACGAACCGATTCCGTATTGCCTGATTTGCAGCGAAGTTGCAGATGGTAACCATTTCGGCGTAGCTGCTGCGTGTCGTGCGTGCGCGGCCTTTTTCCGTCGTACCGTGCAGCACAACAAAATCCACGAGTGTGGTCGTAACGGCCAGTGCTTCTTCCTGTCCTGTAAGTTCCTGCTGGTCGGCTTCCAGATCTCCCCACTGTCTAGCGATGCACGTTCTATGTGCAAAGCCTGCCGTTACGGTAAATGTCTGGAAATGGGCATGCAGCGTAGCTCCGTTCAGCAGCGTCGTGAACAACTGGGTAAACGTCTGAACATCTCCGACGACCGCGGCAAGCCTGTTC…	MFTLARVLNNIGSASSNEPIPYCLICSEVADGNHFGVAAACRACAAFFRRTVQHNKIHECGRNGQCFFLSCKFLLVGFQISPLSSDARSMCKACRYGKCLEMGMQRSSVQQRREQLGKRLNISDDRGKPVLNKLRRAYEMLILNRKHVHNRRENQA	zf-C4
UT245-56	pTH10827	T27B7.2	ggcgcgccATGTCTCCGGCATCTTGGTATCTGCATCGTGATTCTAAACTGTCTCCTTTCAGCCTGCTGTACCTGTTCTACCAGTTCCCGAAACACTCTGCGCTGCACAAACCGGCAATGACCAACAGCCCGTTTAGCTGTCGCATCTGTGGTATGAAAGCGCACGGTACCCATTTTGGCGCGGTTACGTGCCGTGCCTGCGCTGCTTTCTTCCGTCGTTCCTCTAAAAGCAAGTGGATTAACAAGAAATGCCAAAGCAAAACCGGCAATAAAGCTCGTTGCTTCTGCCGTCCGTGTCGCCTGCGTCGCTGTCTGGACAACGGTATGGAAGACACTAAATTTCAGTACGGCCGCGATCTGAACCTGCCGGCCGACGACAACCCACTGGTGCCGTCTATTT…	MSPASWYLHRDSKLSPFSLLYLFYQFPKHSALHKPAMTNSPFSCRICGMKAHGTHFGAVTCRACAAFFRRSSKSKWINKKCQSKTGNKARCFCRPCRLRRCLDNGMEDTKFQYGRDLNLPADDNPLVPSISNFVGRPEFLLFCDSKSSGSKIVIDVQP	zf-C4
UT245-55	pTH10828	C41G6.5	ggcgcgccATGGATTATGGTCGTACTCGTCGTAAACGTCTGCTGATGAATGGTAGCGATGAATCCGAAAACCAGTATGCACAGCACTACGTTGAATTTCTGGAAACCATGTCTTATACCAAGTTCGGTGTATGCGCAGTGTGCGGTTTCTCCTGCCAGGTTCAGTACCATTTCGGCGGCGTGGTATGCGGTGCGTGCTCTGCGTTCTTTCGTCGCACTGTTTCCCTGAACATTCGTTACCTGTGCGACGGCGACAACCAATGTAAAAGCATGCTGAAAAAGTGTCGTGCTTGTCGTTTCGAAAGCTGTGTTAAGACCGCTGGCATGAAACGTTCTCTGGTCCGCCGTAAAAAACCAACGATCAAAACGACCCCGCTGTACATCAAAAACCGCGAAACCC…	MDYGRTRRKRLLMNGSDESENQYAQHYVEFLETMSYTKFGVCAVCGFSCQVQYHFGGVVCGACSAFFRRTVSLNIRYLCDGDNQCKSMLKKCRACRFESCVKTAGMKRSLVRRKKPTIKTTPLYIKNRETHVRNEDVLRAFIPSYTHPSPANETVEDK	zf-C4
UT245-152	pTH10829	ZK177.11	ggcgcgccATGGGTGGTGCGAAAGAATGGTCTGGTCTGGGCCGTTGCCAGTTCCACCTGAAACTGGTTACCACCAACTCTACTAACATCATCAAAATGCCGAGCAAAAACCAGGGCAACAGCAAACCAGACTGCCATCGTAACAAAGTGGAACGTCAGCGTCAGTCCGAAATCGACGATGAGATTCAGAAACTGATGTGTTTCCTGCCTGATCGTCGCTTTGGCACGCAGAAGCTGTCCCGCAATCAAATTCTGAAGacctgcagg	MGGAKEWSGLGRCQFHLKLVTTNSTNIIKMPSKNQGNSKPDCHRNKVERQRQSEIDDEIQKLMCFLPDRRFGTQKLSRNQILK	HLH
UT245-153	pTH10830	K08B12.2	ggcgcgccACCCTGCCGCAGGGTACCCAGGTTGTTCTGGAAGCGCAGCTGCTGACCTCTGACGTTGATCACACTATCGAAGAAGTCCGTCAGGAAGTATTCCAGCGTGAACAGCTGAACGGTGGTCTGACTTGCGGTGGCGCATCTCGTAGCAGCAACCGTACGCTGTTCTGCCGCAAATGCGAGGGCCACGGCCAACAAGTGGTGCTGAAGGGCCATGCTTCCCGCTGTCCATTTAACAATTGTTCCacctgcagg	TLPQGTQVVLEAQLLTSDVDHTIEEVRQEVFQREQLNGGLTCGGASRSSNRTLFCRKCEGHGQQVVLKGHASRCPFNNCS	DM
UT245-40	pTH10831	Y39A1C.3	ggcgcgccGATGCAAAACAACCTGCTCGTCGTGGTGGCTTTCGTGGTCGCGGCCGCGGTCGCGGCCGTGGTGGCCACTTCTACCAGCCGCGTCCACCGTACGAAGATCAGATGAAGAAGCTGGAAGAAGACCTGGCCAGCAAGAAAGTTATCGAAACCGGCGTTAAAGGTCACGTGAAATGGTTCTCTGTTCGTGGCCGTTACGGCTTTGTCGCTCGCGACAAACCGACCGACGAAAACGAAGACTTCTTCGTTCACCAGACCGCTATCACCAAATCCTCCACCATCAAATTCTATCTGCGTACCCTGGATGATGATGAACCGGTGGTCTTCGACATTGTAGAAGGCCTGAAAGGCCCGGAAGCGGCGAACGTAACTGGTCCGGATGGCGAGAATGTGC…	DAKQPARRGGFRGRGRGRGRGGHFYQPRPPYEDQMKKLEEDLASKKVIETGVKGHVKWFSVRGRYGFVARDKPTDENEDFFVHQTAITKSSTIKFYLRTLDDDEPVVFDIVEGLKGPEAANVTGPDGENVRGSRFARTLLTHWRTRGRGGARGRGGRGRGAPRQTRDQDGDEKDE	CSD
UT245-143T07C5	pTH10832	T07C5.3	ggcgcgccATGGGTTCTATCTGCGCGACCCTGGTTACCTGCTTCTTCGAAGGTCAGTGGAACCACGGTCCGTTCCTGGAAACCGCGTCTATCGTTGGCATCGCAATCAAATACCTGGTCCTGGAAAAAAACTTCCCAAAATGCCGTCACTGCCGTTTCAACAAATGTGTAGACGTGGGCCTGCTGACCGTGAGCCGTTACACTAAATTCGCCGACCTGATCAAATATCTGTTCTGTCTGGACGCTAACCGCGAACATACTTTCCTGAACTTCAGCATTTCCTCCGATTTTGATACTAACAATTTTCTGGATGAGAAACCTACGCGCTTTATTAAGAAGacctgcagg	MGSICATLVTCFFEGQWNHGPFLETASIVGIAIKYLVLEKNFPKCRHCRFNKCVDVGLLTVSRYTKFADLIKYLFCLDANREHTFLNFSISSDFDTNNFLDEKPTRFIKK	zf-C4
UT245-128	pTH10833	C56E10.4	ggcgcgccATGTGGCAGAAATGCCCGCGTCAGAAACACCTGGGTTTCGACATCCGTGACCAGTCTGAATTCGTTGAACAGATGGCGCTGTCTGTTTTCGTTCTGTTCTTCCTGATCGTTCTGTTCCCGGAACAGGGTTTTATGTGCTTTGTCTCTGGTGCGCGTATCAAATGCCGTTCTTGCCGTCTGGATCGTTGTCTGCAGCAGGGCATGCGCAAAGAAGCGGTAACCAGCGGCATCGTAGGCAACGAAGAGAAAGTGGCACCGCAAACCGCATACCTGGCCAGCATCAGCCTGCCATCCACCTCCACCGCTATTCCTAAGGTGACTGAGACTGCTTCCTGTCTGCGCCAAACGCTGCGCCTGATTacctgcagg	MWQKCPRQKHLGFDIRDQSEFVEQMALSVFVLFFLIVLFPEQGFMCFVSGARIKCRSCRLDRCLQQGMRKEAVTSGIVGNEEKVAPQTAYLASISLPSTSTAIPKVTETASCLRQTLRLI	zf-C4
UT245-127	pTH10834	K06B4.6	ggcgcgccATGAACTGCCTGGTTTGCTCTGCGCGTGCGTTCAACCGTAACTACGGTGTTATGTCTTGCTTCGCATGCAAAATGTTCTTCCGTCGTACCGTCTTCAAAAACATGCTGTTCAACTGCAAATACTTCAAAAACTGTACTATCCACTACAAAACGCATCCGAAATGTCGTGCCTGTCGCTTCCAGAAATGTCTGAACATCGGTATGAAAGCTGCTTCTAAAAACGACCGCATCGTAAGCATCGGCAACTACGAAGACTACAACTTTGACAAACTGCTGAACGATCTGATCGTGAAGAACGATAAGAATTATAGCAATTTTATTGATTTTTATTCCCTGGAGGACCCATCCCTGAAGGATATTacctgcagg	MNCLVCSARAFNRNYGVMSCFACKMFFRRTVFKNMLFNCKYFKNCTIHYKTHPKCRACRFQKCLNIGMKAASKNDRIVSIGNYEDYNFDKLLNDLIVKNDKNYSNFIDFYSLEDPSLKDI	zf-C4
UT245-125	pTH10835	T27B7.3	ggcgcgccATGACCAACACCCTGTTCCTGTGCCGTATCTGCGGTAAAAACGCGCACGGTACCCACTTCGGTGTTATCACTTGCCGTGCGTGCGGTGTTTTCTTCCGTCGTTCTTTCAAATCTAAATGGATCTTCAAAAAATGCAAAAAAGAAGACGAAGGCAAAATCTGCACTTGTAAACCGTGTCGTCTGCAGAAATGTGTCGAAATGGGCATGTCTAGCAAGAACTTCCAATACGACCGCGACGCAATCCTGGCTAAGCACCTGACGCCGAGCATTAGCTATTTTGTAGGCCGCCCGGAGTTTCTGCTGTTTTGTGATCCATCCCATTCCGCCCCTAAGATTCTGATTAATCTGGATGGCCTGGTGTCCacctgcagg	MTNTLFLCRICGKNAHGTHFGVITCRACGVFFRRSFKSKWIFKKCKKEDEGKICTCKPCRLQKCVEMGMSSKNFQYDRDAILAKHLTPSISYFVGRPEFLLFCDPSHSAPKILINLDGLVS	zf-C4
UT245-13	pTH10836	BC49C3.5	ggcgcgccGAAATGTTCTATTCTGAAGGCAACTTTTACCATGATATCTATATGGAGGAGCTGGCGAATCTGGCTGAAACCTCTCACAAAAACGTTCGTGACACTCTGTCCCGTCTGCGTAAGAAAGACGAACGTGCCGGCAAATACGTACCGCCGCCGCCGAAACAGATGTACGAATTCACCTCTGAACAGCGTGGCGCCCTGGACCAGGCATTTCTGGTGACGCCGCAGATGGATTCTGACGGCGCTCGTGAACTGTCCGAAATCACCGGTCTGACGGTGAAACAGATCAACAACTGGTTCTGTAACCAACGTCGTAAAGCGGACGGTCGCTCCGCGGAAAAAGATAAAAAGCGTCGCGAACGTATCCGCGAGGACATGAAAAAGAACGGCCTGGGCC…	EMFYSEGNFYHDIYMEELANLAETSHKNVRDTLSRLRKKDERAGKYVPPPPKQMYEFTSEQRGALDQAFLVTPQMDSDGARELSEITGLTVKQINNWFCNQRRKADGRSAEKDKKRRERIREDMKKNGLGRVGTFRSEAVELFEKEYETMLQLEAIGGGKVRIPYTELVEKTGMERKKIRDWFSKRKGRDKRFLENMENTREVSPQNTQQNIQDILIKIVTQSGTLCSTDC	Homeobox
UT245-14	pTH10837	T22H9.4	ggcgcgccATGTCTTCCAGCTCTCTGTCTTCTAGCTCTAACGCTTCCTCTCTGTCTGCTCCGGAAGGTCTGAGCCCGAATAACTCTCTGTCCCCAGATGTAGGTGCGCAGCGTTTCTTCTCTCAGGGCAAACGTATCCCGAAAGACGTTAAACGTCACTGCGGTATGTGCAAACAGCACGGTGTGTTCGTCGAAACCCGTGGTCATACTTGCGAATACCGTTCTTGTGAGTGCGAACAGTGCGACCTGGTACGTAAACGTCGTGAGATTATGTCTACTCAGATCCGCCTGCGTCGTGAACAGGACAAGAAATTCCAACGCACGAACGACATCAGCGAAGCGAATGTTTTCCCTGGTTTTACTGGCGGCGAGGCCGATGAAAAAGCGGTTATGGAAAACA…	MSSSSLSSSSNASSLSAPEGLSPNNSLSPDVGAQRFFSQGKRIPKDVKRHCGMCKQHGVFVETRGHTCEYRSCECEQCDLVRKRREIMSTQIRLRREQDKKFQRTNDISEANVFPGFTGGEADEKAVMENMNMCYFCQKCKNHNVLVWKKNHKKECQYSSCECQQCNLIDSRRALDRHIKKRKMSIKGNTVEAIAPKSPKKEGSTTASSSSLSSSSGCNSDESASSSD	DM
UT245-102	pTH10838	F57C9.4	ggcgcgccTCTATGGACCTGTCTAACCAGAAACAGATGGAAGAACACTTCCTGAACAAACACGTTGACAAAGAAAAAAAAAAATGCGAAGCGTGCCCGTCTGACCAGTTCCAGCCGCACAACATCGGTCAGCACTACCGTCTGCACACCAACAGCGTTTTCGCGTGCGAACACTGCGGTAAACGTGGTCGTCGTAACTTCCTGAAAACCCACATCCGTACCCACACCGGTGAGCGTCCATACCGTTGCGATACTTGTAGCAAATCCTTTACTGATGCATCCACTCTGCGTCGCCATGGCCTGGTCCATACGGGCGAGAAAAAGTATCAGTGTCCTGTATGTGGCCGCGCTATCGCTCGCAAGGATAATGTGAAGGCCCATATCCGCTCCCATGGCATTC…	SMDLSNQKQMEEHFLNKHVDKEKKKCEACPSDQFQPHNIGQHYRLHTNSVFACEHCGKRGRRNFLKTHIRTHTGERPYRCDTCSKSFTDASTLRRHGLVHTGEKKYQCPVCGRAIARKDNVKAHIRSHGIQI	zf-C2H2
UT245-8	pTH10839	ZK829.5	ggcgcgccATGAATGAACCGACTTACAATTACAACGACTTTCTGATGCCGGCGCTGGCGGACGGTCAACCGGACATCAGCATTGAGATTTCTGAGATTACCAAAAAGCAGTGGAACCAACTGATCGGTATTCACGAAGTTGTGGTTTATAAAGACTGCCGTAAACTGTTCCCGGCTGCTAAATTCTCCGTTCGTGGTCTGGACCCTGCGCTGCTGTATTCTGTTGAGATCTGCTTCGACGTTCTGTCCCCGTTTACCTTCTCCTATAACAAAAAGCTGGAAAAATGGATTCCGACTAAAACCCCGGTCAACTGCCAGTCCTCCGCTCTGTCTAGCATGATCTGCGAAACTGGCGATTGGTTCATGAACGGTGATATGGATTTCGGCGCACTGAACATCA…	MNEPTYNYNDFLMPALADGQPDISIEISEITKKQWNQLIGIHEVVVYKDCRKLFPAAKFSVRGLDPALLYSVEICFDVLSPFTFSYNKKLEKWIPTKTPVNCQSSALSSMICETGDWFMNGDMDFGALNITSSHEKAKEKIEQNRIAVCLSSRTMYQIRVVLYEMQNDELIYLKETKFDEMIFITCTEYRGQVNRELKKSMNRFSRKRKYEISGTKCQRSKRPAKLPVESLDEKELKNAEKGIMSLLESSPSSPSYLYQY	T-box
UT245-10	pTH10840	F28B12.2	ggcgcgccATGGACCTGTCCCAGCTGGTGTTCCAGCAGTCCTCTCCGGACAAAACTGTCTCCCCGGTTAAGTCTGAGGTTGTTGAGGAGACGAAGCCAATCGCATCTTCCCAGCTGACCCTGCACTCCTTCTCTGCTTACGTGAAATGCAACAAAACTTCTCTGCGTACCGAGCTGGTGAAAATCGAAAATACCCTGGAAAAGGATGATATCGACATCTCTGTGTTCTACGAGAAGTACCCGAAACTGCTGCGTGAACTGTTCGAAAAATCCGAGAAAAAAGATGTTTTCTTTCTGGCTAAATGCTGGGCGAACATCAACGTCAGCGACGATGTTCAAAATTGCCAGTATGCCGTTGATTCCTTTTACTCTTCCCGTGAAAAATTCCAGCTGAAAGTGT…	MDLSQLVFQQSSPDKTVSPVKSEVVEETKPIASSQLTLHSFSAYVKCNKTSLRTELVKIENTLEKDDIDISVFYEKYPKLLRELFEKSEKKDVFFLAKCWANINVSDDVQNCQYAVDSFYSSREKFQLKVSTMACSFGNQAVEKIEQYFPIEFDGSYSFILNNSPMCDYMVKFIAELKKLNVIETMNNVLENFTVLQIVTNSETDELLMVLCFVFEVSQEPEPSCSVYRLIDGGGDSDE	TEA
UT245-3	pTH10926	F28C6.1	ggcgcgccCTGTTCCCAAATGATGACACTTCTAGCGGTAAACTGTTCGACTACTTTCTGACGAACACCGAACGTGAAAATGAATCCGAAAATAACATCCCACACCCTTATAACAAAGCTGTCTTCCCTACTTTTGGTGTGCCGGTGTCTAGCGACGGCAACGTGGTTGCAGAAGTGGTTGACGGCCGTCTGCCGGCTGTTGGTACTCGTTCCAAATACGACCTGACCGTAGATGAGCTGCGTCGCCGTTGCGGTGCACCGGAACATATGAATCAATCCGCTCTGTACTGCTTCTTCCGCAAATCTAAGAAAAAGGAAGCTATTAACCGTGTTAAGAAAGTGCTGACCGACTATAACATTACCGTCCGTACCATGCAGCGCCAGCGTAAAGTTACCTGCT…	LFPNDDTSSGKLFDYFLTNTERENESENNIPHPYNKAVFPTFGVPVSSDGNVVAEVVDGRLPAVGTRSKYDLTVDELRRRCGAPEHMNQSALYCFFRKSKKKEAINRVKKVLTDYNITVRTMQRQRKVTCFSPFLEEEATALARDLDSITEEFLPIDAIALEMLEKLIFNNKNLDICLRILKNTNKTITRVIKTLEVRQPKITGQKEKLKGNSLDLSYHNFSLTTHGFGHPNSLSHYRSYQKIVEQAALYCEKMQKGASLPSKEYLIPGQKPFENMSNEFFVEWRMRSYHKKARKEMLDFNQAYSR	AP-2
UT245-12	pTH10927	Y46E12A.4	ggcgcgccATGCAGTGTCATGTTGCTCTGATGGAAAAATCTCTGTGGCGTGAATTTGATTCCCAGTGCAACGAAATGATTATTACTAAAATTGGTCGTAACCTGTTCCCAATCCTGGAATTTGCTTTTAAGGGTCTGTGCGAACACCTGAACTATAAAATCGGTGTTACTATGGAACCGATCTCTTACCAGAAACTGAAATTCACCGCTGGCCGCTGGGAATCTCTGGATATTCAGGAAGAAATGGTTCAACCGAACGAAGTATTCCTGATGAAATCTGGTCGCGAGCTGCTGCAGCGTGGTCTGAAACTGGAAAAACTGAAGCTGACTAACTCCAAAGACGCGCTGCAGAAAAGCGACCAAATGATCCGTGTTCAGTCTATGCGTCAGTACATGCCGG…	MQCHVALMEKSLWREFDSQCNEMIITKIGRNLFPILEFAFKGLCEHLNYKIGVTMEPISYQKLKFTAGRWESLDIQEEMVQPNEVFLMKSGRELLQRGLKLEKLKLTNSKDALQKSDQMIRVQSMRQYMPVLNIYEISPVGAHNQIGKFQFPETKFIAVTAYQSELVKQLKVQKNKFAQGFRESIKSNATSSTKRPLSTTSSNSSPDSTLSMSSENLGHTTKKGRGGGQEIGVL	T-box
UT245-7	#N/A	ZK177.10	ggcgcgccATGTCTTTTAACTACTCCATGAATACTCCGTCTCCGTCTATGCTGAGCTTCGACATGGATATCCCGATCACGGCGTTTCTGCACAACAGCGATGTATTTCAGCTGTTTCACCCGGATATCATGGAGCAGGTGGTCGTTAACAAAGAACGTGTCTTCTTCCCAACCCCGAGCTTTAATGTGCTGAACCTGGAAAGCGACTGCCTGTACAAAATGTCTCTGCGTTTCGACAAAACCAACAACAAACGTTTCCAGTTCAACCGCCAGACCAAACAATGGACGGAATACGACAAGGTTAGCAACCACAAGGAAAGCGAAGTATTCGTGCACCCGTCCGAAATCCGCACCGGCGATGATTGGATGAAATCCCCGGTAGAGTTTTTCATCAAAGTTA…	MSFNYSMNTPSPSMLSFDMDIPITAFLHNSDVFQLFHPDIMEQVVVNKERVFFPTPSFNVLNLESDCLYKMSLRFDKTNNKRFQFNRQTKQWTEYDKVSNHKESEVFVHPSEIRTGDDWMKSPVEFFIKVTNLRSSESDEVICLESQCKYQPTLLIQKVFRDCFGCFQAHGPPVEIKFALLTFIATTRYCSRRIADIKSSLNPFSSQDTKKKNKRNTLKAVSQEENQPIENSSFHQSFSNQYLSKPDLDLKSTTLLQIAPD	T-box
UT245-9	#N/A	T19A5.5	ggcgcgccATGATCGCGTCTACTTCTACGGATAGCCTGGAAACCAATAGCTTTGAACGCTCCACTAAATGCCTGGTGTACTTCCAGAGCGCGCACGGCAACCACTTTGGTATCGACAGCTGCCGCGCTTGCGCCGCTTTCTTCCGTCGCGTGTTTGTGACCCACAAACAGCACTTCAAATGCCAGACCGGCCAGAACCAGTGCGTTCCGGACCCGCGCGGTCGTTGGAATTGTAAAAAGTGTCGCACCGATCGTTGCTTCCAGCTGGGTATGCGTCCAGATTCTAAGATCCTGTATTTCGCGACGTTTCTGAACCTGCAGCTGTTCCGCTACTCTGTCCAACCGCGCTGTATCTTCCAGTGCAGCCCGAAGCTGATTTCTGAAAAATGTCTGGTTTGTG…	MIASTSTDSLETNSFERSTKCLVYFQSAHGNHFGIDSCRACAAFFRRVFVTHKQHFKCQTGQNQCVPDPRGRWNCKKCRTDRCFQLGMRPDSKILYFATFLNLQLFRYSVQPRCIFQCSPKLISEKCLVCDQPSHGNHFGVDSCRACAAFFRRVFVTHKQQYKCINELEQCVPDARGRWKCRKCRTDRCFELGMRPDNIQYNRDMFSCTGEFPKQVIYKSTRIIPSKPECITYFDFSSLLESVENI	zf-C4
UT245-147	#N/A	R11G11.12	ggcgcgccATGCTGATCTCTATCGAATTCTGCAAAATCTGCGACCGTAAATCTCAGGGTATCCACTTCGGTGTTCCGTCTTGCCGTGCGTGCGCGGCGTTCTTCCGTCGTCGTGCAGGTTCTGACCTGGTTGAAAAAAGCTGCATGAACAAAAAATGCGGCAAAGAATTCTTCCTGTGTAAACCGTGTCGTCTGGTTCGTTGTTACGCAGTCGGCATGGACGAGAAAAAATTCCAGTTCGACCGCGATGCCCTGGCTAGCACCGTACTGCTGAATACTATTCCGAAGAGCTTCGATAAGTTTGTAGGCCGCCCGCAATTTGTGCATTTTTGTGATCCATCCGCTCCTTCCACGTCCAAGTTTATTGATGTGCGCacctgcagg	MPCCKVCTAEGCHGTHFGTICCRACAAFFRRTAFSKSFCKPCRLRKCLEVGMETSNFQYHRDSLHDSESSSVFKKLEAKHSKQTISKIPKSFECFVGRPGMILF	zf-C4
