# Supplementary figures and images for: Mapping and analysis of Caenorhabditis elegans transcription factor sequence specificities
Source: eLife journal article supplement (doi:10.7554/elife.06967), 2015-04-23

A

T-Box

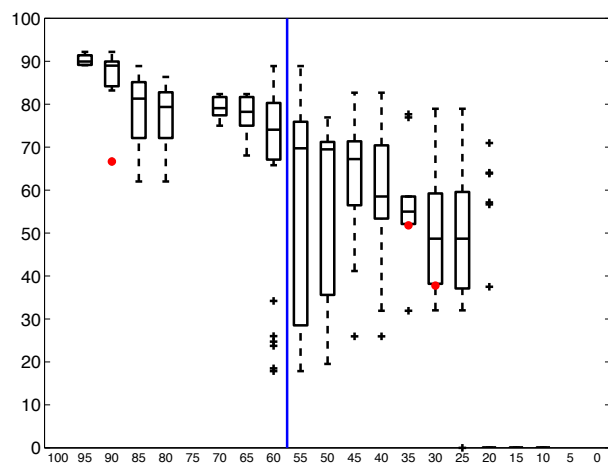

B

CENP-B

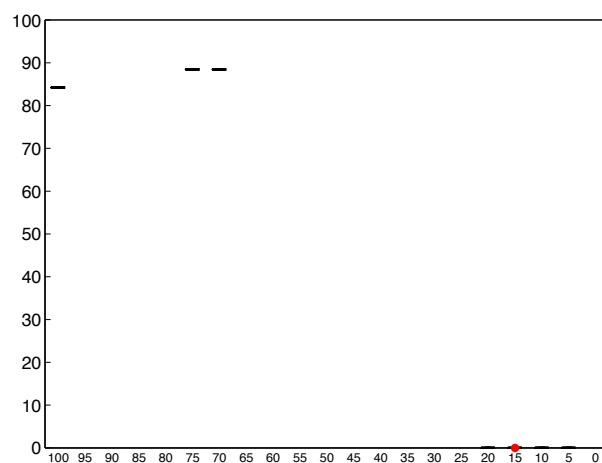

C

CxxC ZF

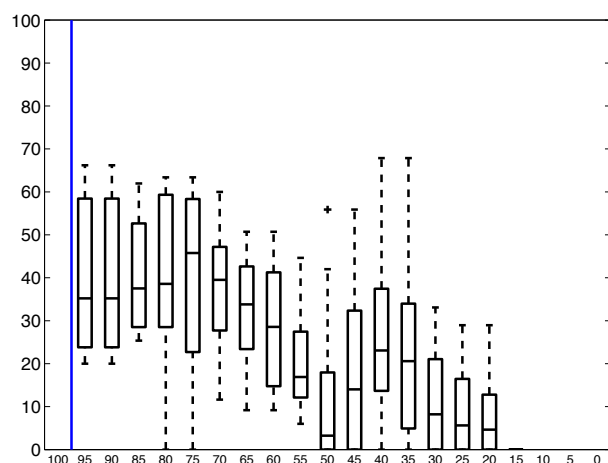

D

HSF

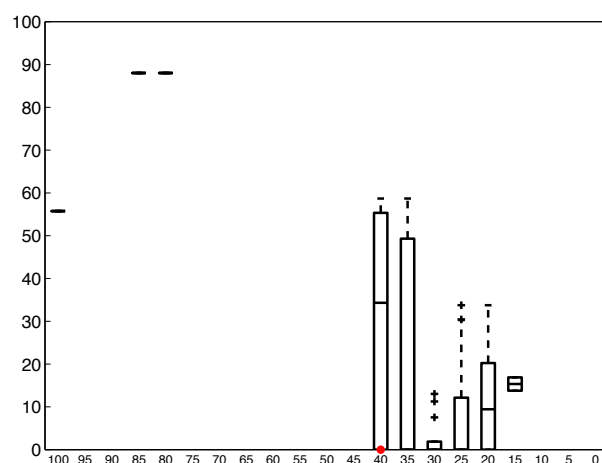

8-mer overlap

DBD %ID

E

SRF

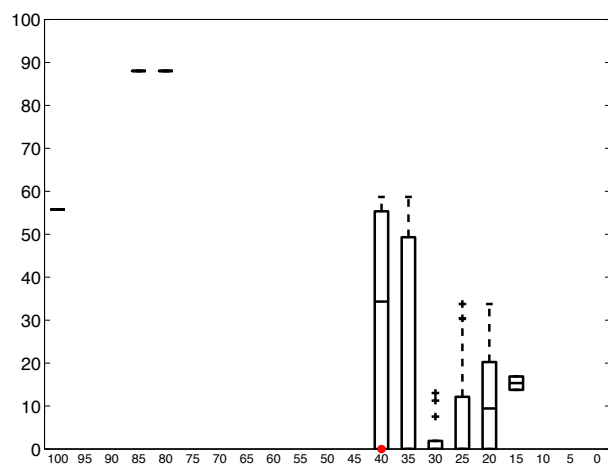

Supplement: supp [file elife-06967-supp-v1.zip]

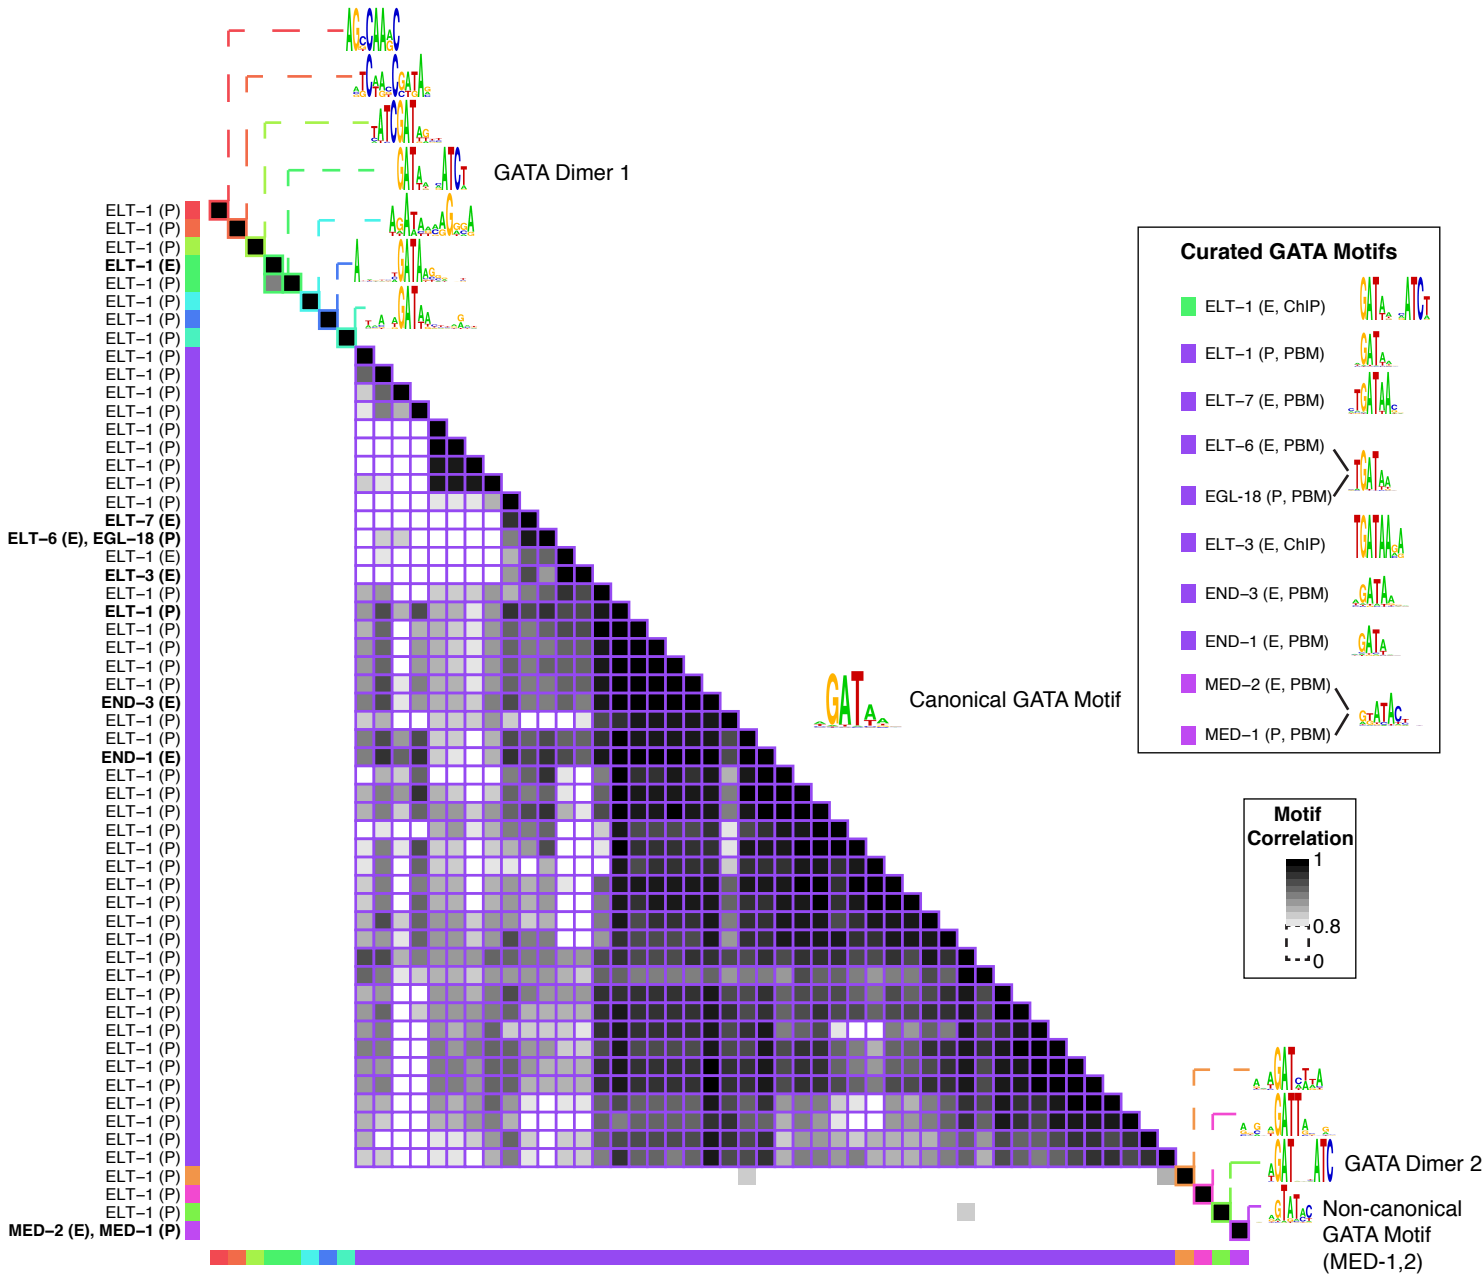

Supplement: supp [file elife-06967-supp-v1.zip]

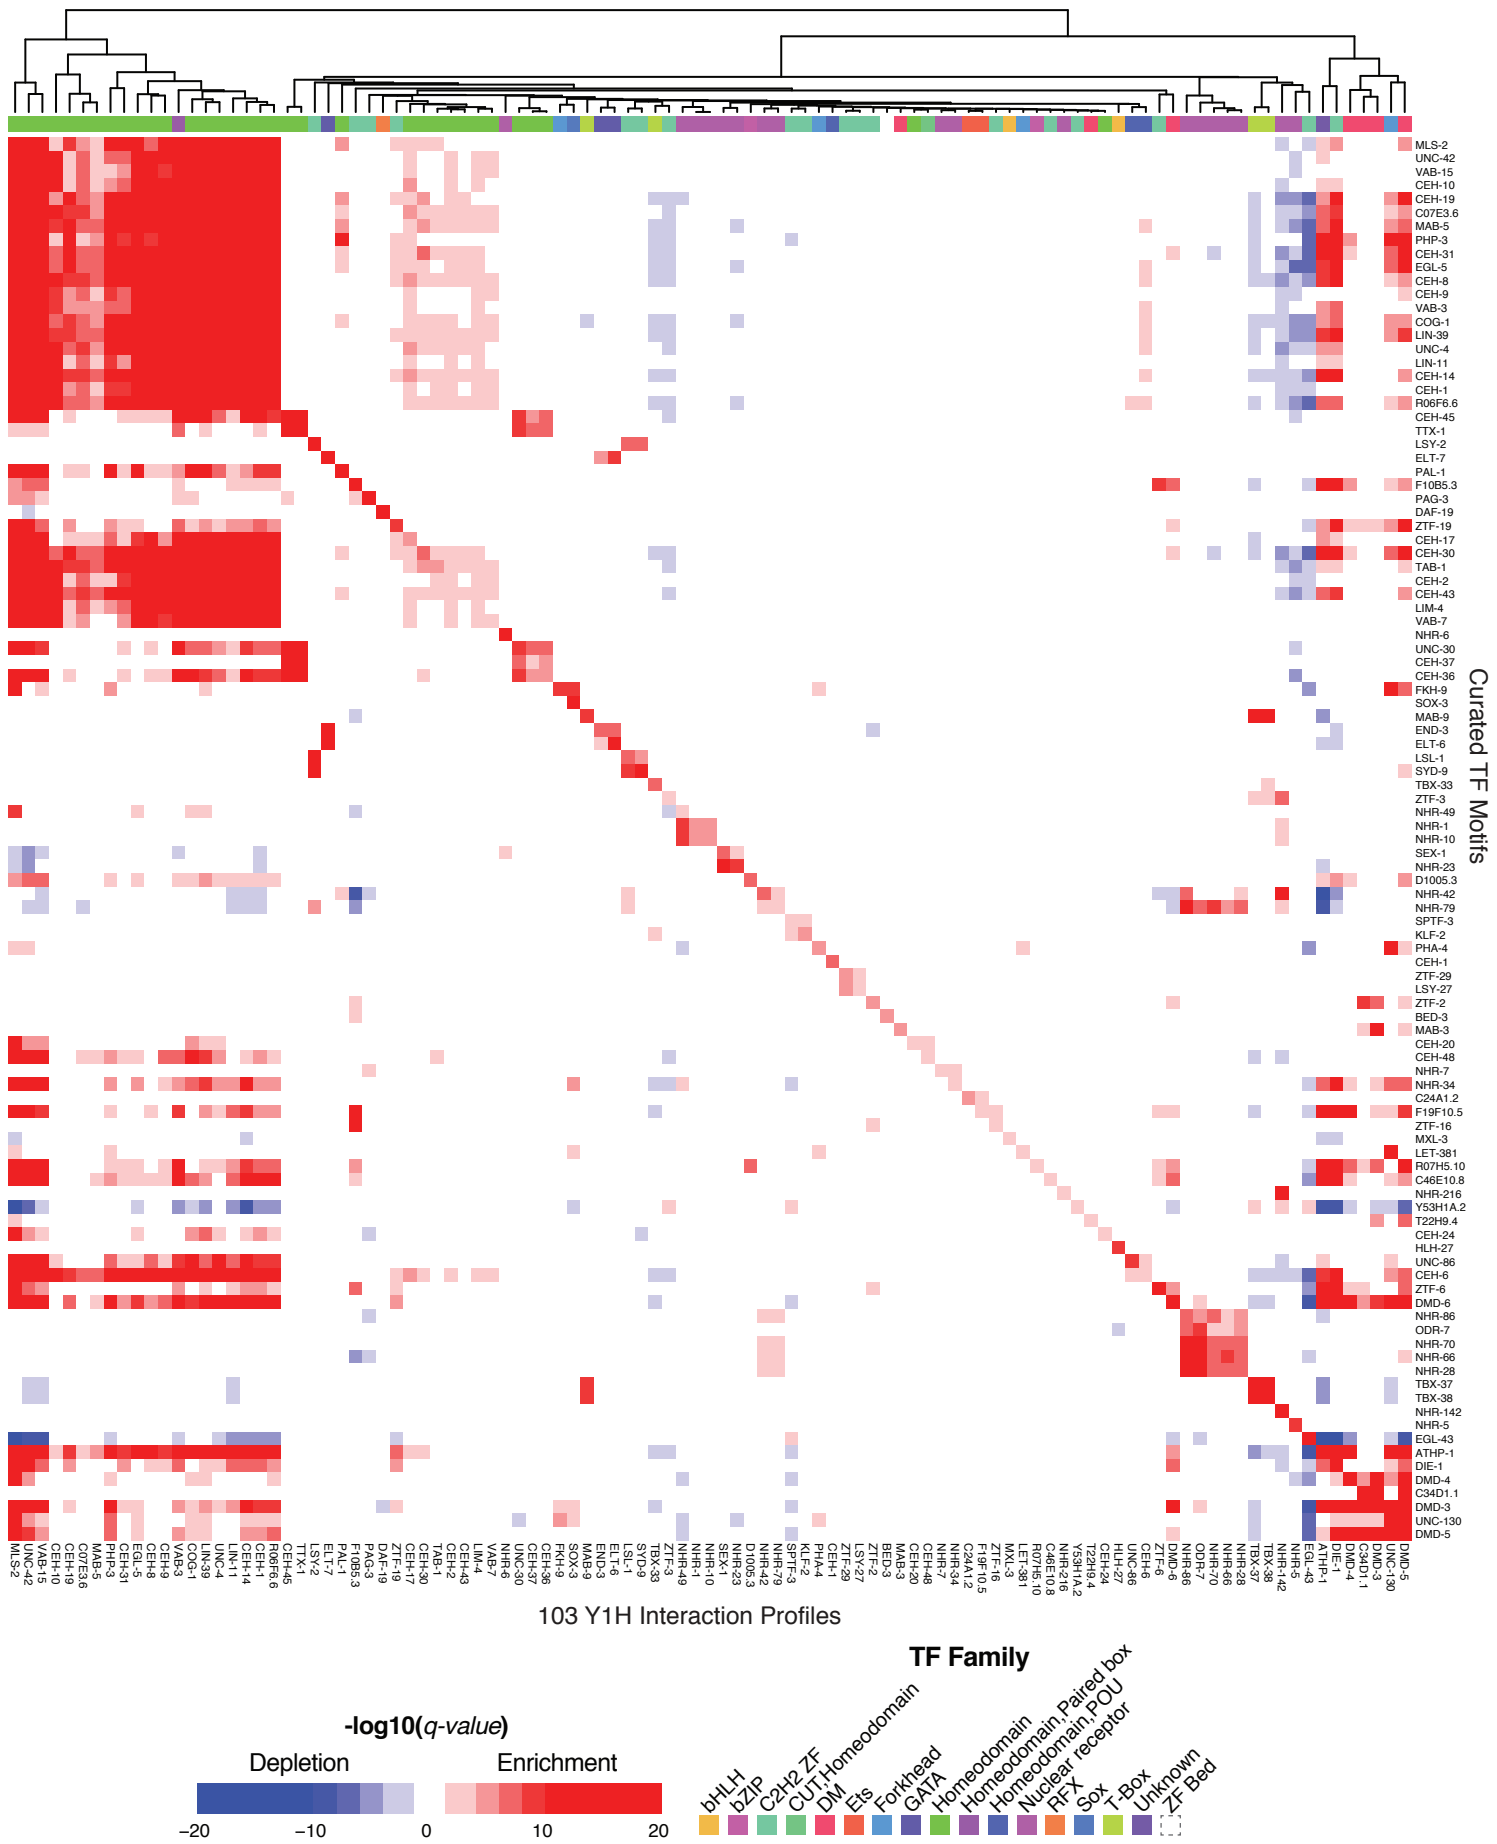

Supplement: supp [file elife-06967-supp-v1.zip]

A

E2F

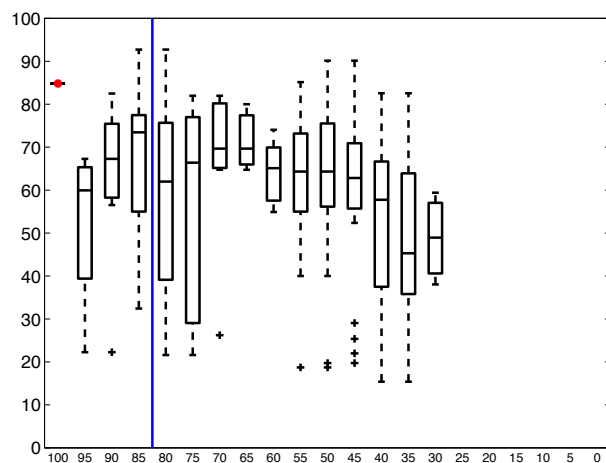

B

Ets

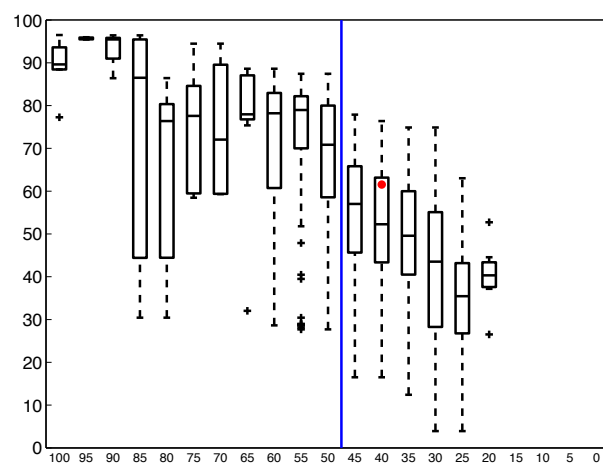

C

Forkhead

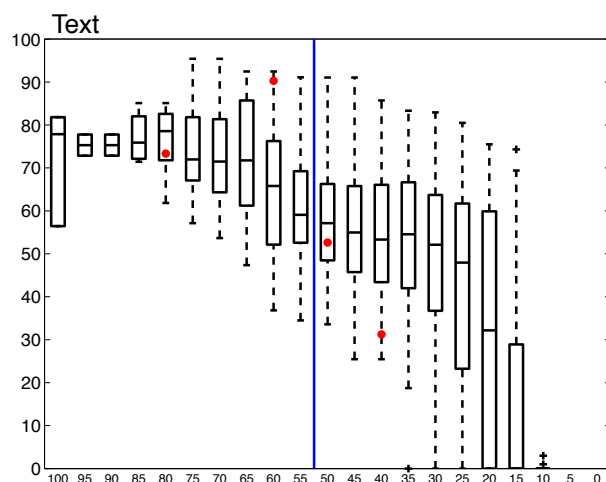

D

GATA

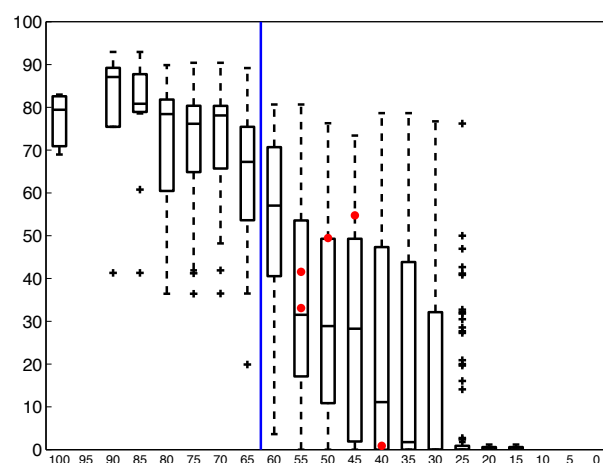

E

HMG Box

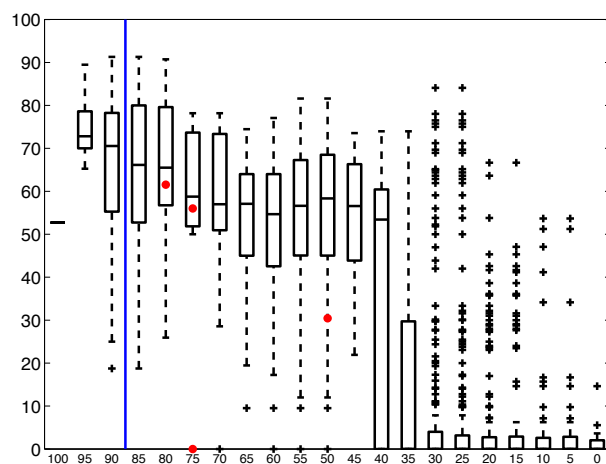

F

Homeodomain

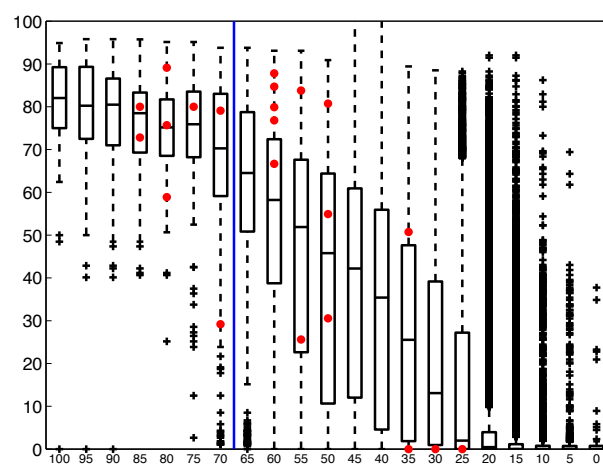

DBD %ID

8-mer overlap

Supplement: supp [file elife-06967-supp-v1.zip]

A

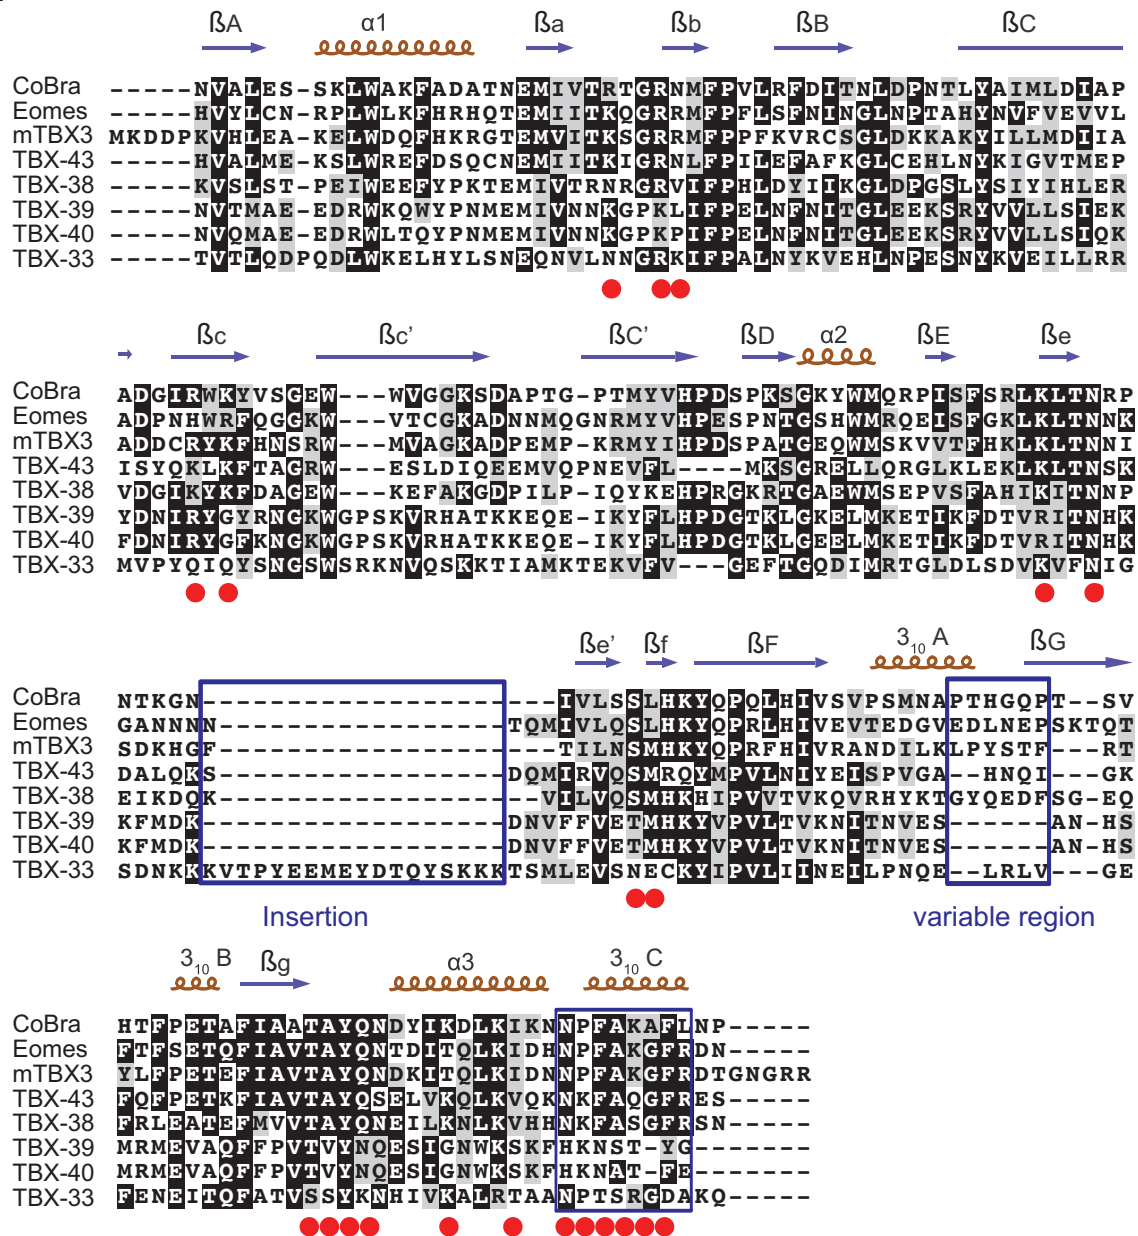

B

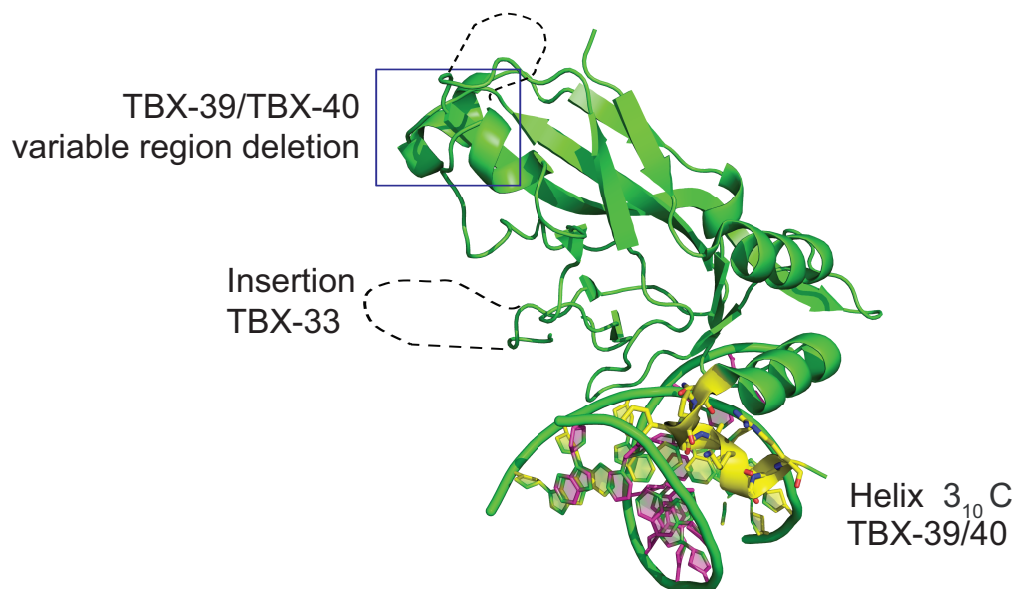

Supplement: supp [file elife-06967-supp-v1.zip]

**A** ARID/BRIGHT

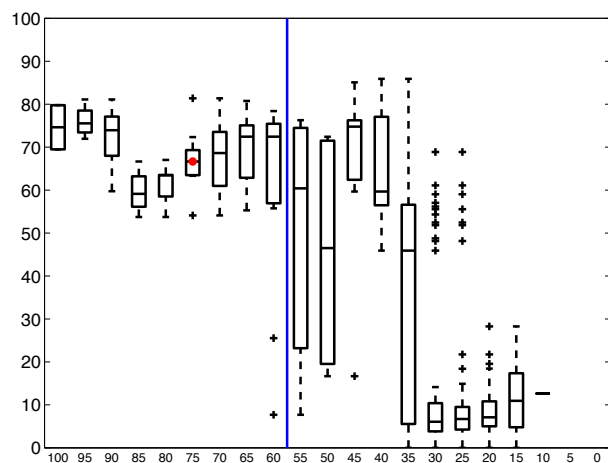

**B** AT-Hook

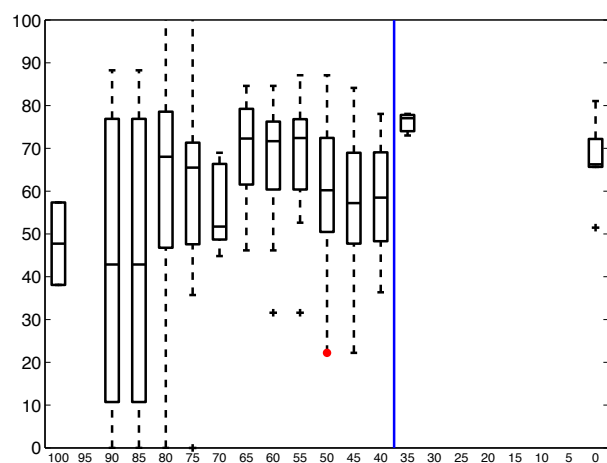

**C** bHLH

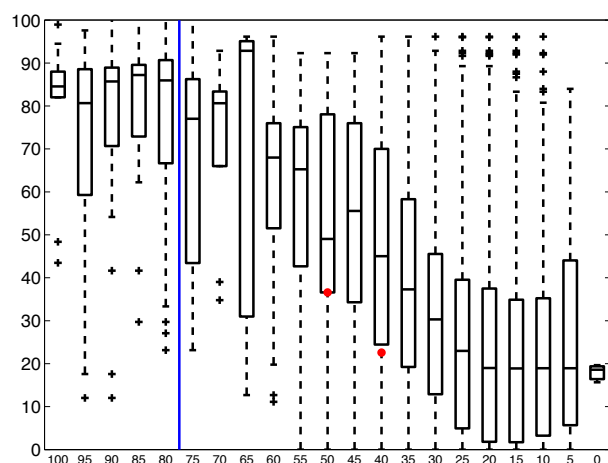

**D** bZIP

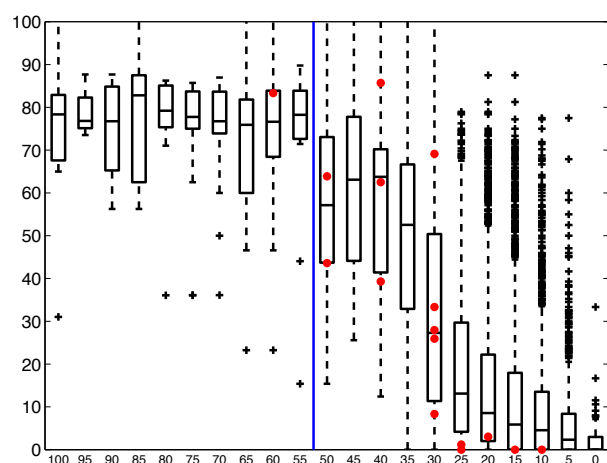

**E** C2H2 ZF

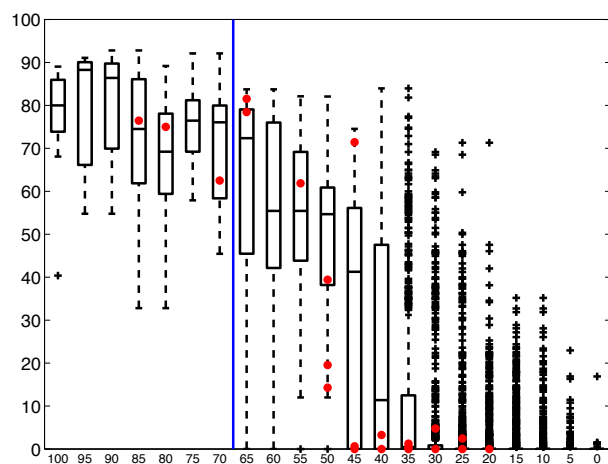

**F** DM

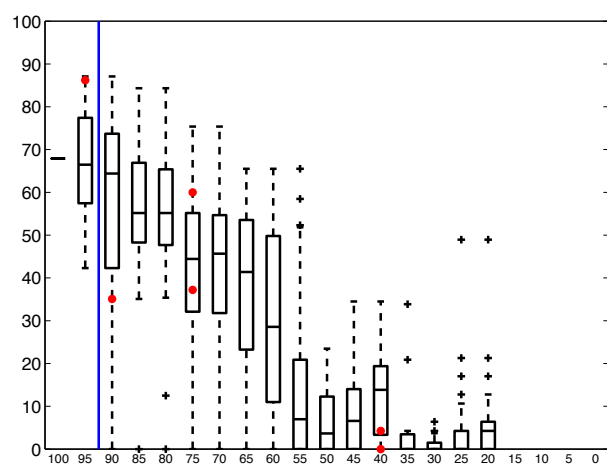

DBD %ID

8-mer overlap

Supplement: supp [file elife-06967-supp-v1.zip]

A

MADF

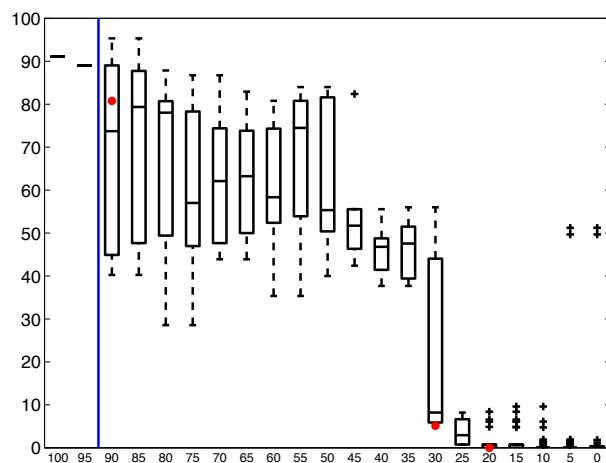

B

NHR

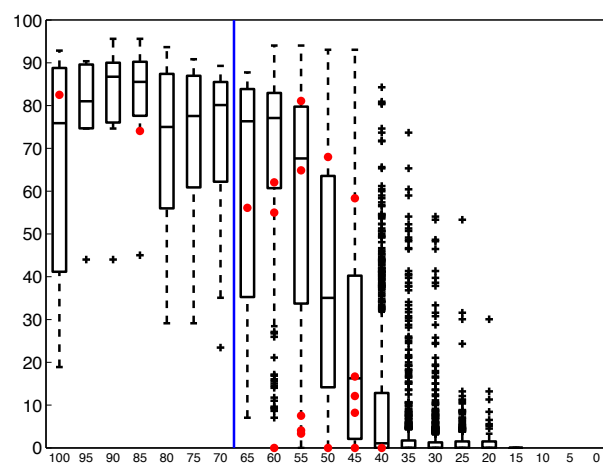

C

Pax

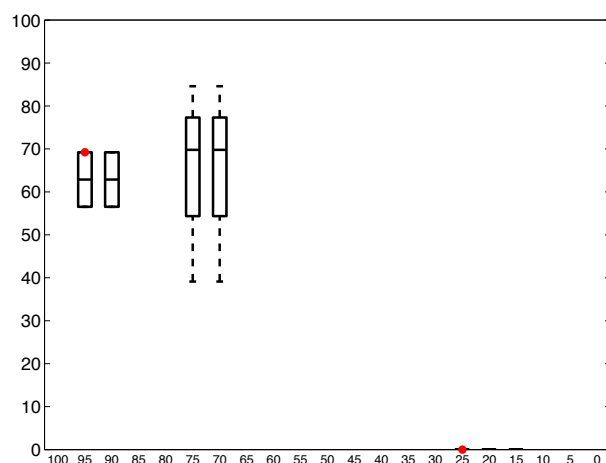

D

Pipsqueak

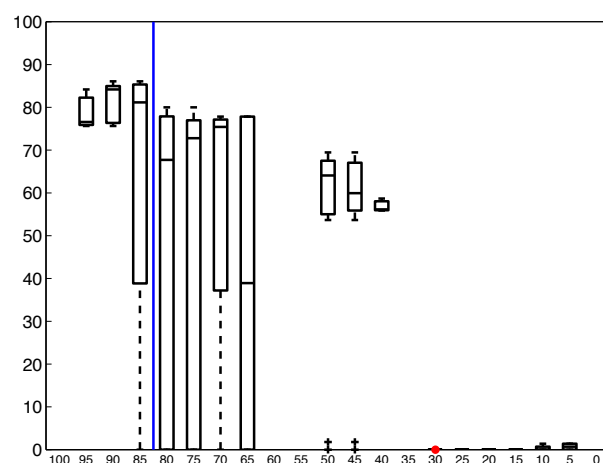

E

RFX

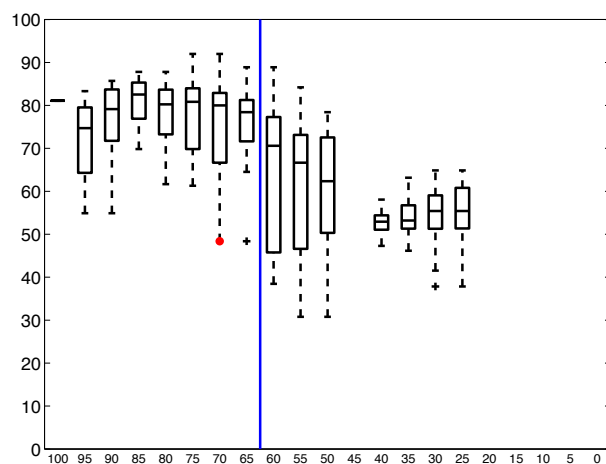

F

SAND

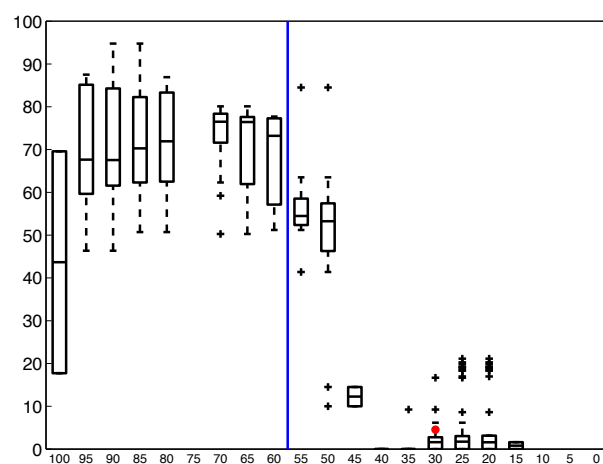

DBD %ID

8-mer overlap

Supplement: supp [file elife-06967-supp-v1.zip]
